# Supplementary material for: Deconstructing cold-induced brown adipocyte neogenesis in mice
Source: eLife. 2022 Jul 18;11:e80167. doi: 10.7554/eLife.80167 (PMC9348851; doi:10.7554/eLife.80167)
Supplement: Figure 4—figure supplement 1—source data 1. [file elife-80167-fig4-figsupp1-data1.xlsx]

## Sheet: Percentages by Animal
Figure 4-figure supplement 1–Source Data 1. Quantification of co-expression of smFISH probe Nnat with probes for Bmper and Pi16 (n=3 animals).
	Bmper+ Nnat+	Bmper-Nnat+	Pi16+ Nnat+
Animal 1	0.734177	0.261603	0.00421941
Animal 2	0.752809	0.247191	0
Animal 3	0.792593	0.207407	0
	0.75986	0.238734	0.00140647

## Sheet: Raw Counts
Figure 4-figure supplement 1–Source Data 1. Quantification of co-expression of smFISH probe Nnat with probes for Bmper and Pi16 (n=3 animals).
	Number of Bmper+Nnat+ Cells	Number of Nnat+Bmper- Cells	Number of Pi16+Nnat+ Cells	Total Cells
Animal 1	174	62	1	237
Animal 2	67	22	0	89
Animal 3	107	28	0	135
