# Supplementary material for: Deconstructing cold-induced brown adipocyte neogenesis in mice
Source: eLife. 2022 Jul 18;11:e80167. doi: 10.7554/eLife.80167 (PMC9348851; doi:10.7554/eLife.80167)
Supplement: Figure 5—figure supplement 1—source data 1. [file elife-80167-fig5-figsupp1-data1.xlsx]

## Sheet: Figure5_figsuppl1_smFISH_Ad
Figure 5-fugure supplement 1–Source Data 1. Quantification of the number of Adrb1 molecules in Nnat+ cells between WT and Adrb1 KO samples
Genotype	Adrb1 Molecules
WT	3
WT	6
WT	3
WT	8
WT	4
WT	6
WT	3
WT	2
WT	5
WT	4
WT	5
WT	10
WT	1
WT	6
WT	4
WT	4
WT	7
WT	4
WT	5
WT	7
WT	8
WT	4
WT	4
WT	5
WT	6
WT	6
WT	3
WT	1
WT	3
WT	3
WT	4
WT	7
WT	5
WT	9
WT	6
WT	8
WT	3
WT	3
WT	7
WT	1
WT	4
WT	9
WT	11
WT	5
WT	3
WT	5
WT	9
WT	8
WT	2
WT	3
WT	4
WT	3
WT	4
WT	8
WT	4
WT	6
WT	9
WT	5
WT	5
WT	7
WT	11
WT	6
WT	6
WT	1
WT	5
WT	10
WT	11
WT	4
WT	4
WT	1
WT	3
WT	12
WT	8
WT	4
WT	7
WT	3
WT	6
WT	4
WT	8
WT	6
WT	6
WT	1
WT	1
WT	14
WT	5
WT	3
WT	10
WT	7
WT	5
WT	3
WT	7
WT	0
WT	6
WT	9
WT	12
WT	6
WT	5
WT	1
WT	2
WT	6
WT	2
WT	0
WT	6
WT	4
WT	2
WT	4
WT	2
WT	3
WT	3
WT	4
WT	2
WT	2
WT	1
WT	5
WT	2
WT	3
WT	2
WT	8
WT	4
WT	1
WT	3
WT	2
WT	2
WT	4
WT	3
WT	3
WT	1
WT	6
WT	0
WT	2
WT	10
WT	4
WT	2
WT	2
WT	0
WT	1
WT	6
WT	5
WT	4
WT	2
WT	5
KO	0
KO	0
KO	1
KO	0
KO	0
KO	0
KO	0
KO	0
KO	0
KO	0
KO	1
KO	0
KO	1
KO	0
KO	0
KO	2
KO	3
KO	0
KO	0
KO	2
KO	0
KO	1
KO	5
KO	1
KO	1
KO	1
KO	0
KO	0
KO	0
KO	0
KO	0
KO	0
KO	3
KO	1
KO	3
KO	2
KO	1
KO	1
KO	1
KO	0
KO	1
KO	0
KO	2
KO	0
KO	0
KO	0
KO	1
KO	2
KO	2
KO	1
KO	1
KO	0
KO	0
KO	1
KO	1
KO	0
KO	0
KO	0
KO	1
KO	1
KO	0
KO	0
KO	1
KO	3
KO	0
KO	0
KO	1
KO	1
KO	0
KO	2
KO	1
KO	0
KO	1
KO	1
KO	1
KO	0
KO	0
KO	0
KO	0
KO	0
KO	0
KO	0
KO	0
KO	1
KO	1
KO	2
KO	3
KO	1
KO	0
KO	0
KO	1
KO	0
KO	0
KO	1
KO	0
KO	0
KO	4
KO	1
KO	0
KO	0
KO	0
KO	1
KO	0
KO	0
KO	0
KO	0
KO	0
KO	2
KO	3
KO	1
KO	2
KO	0
KO	1
KO	1
KO	0
KO	1
KO	1
KO	0
KO	1
KO	0
KO	0
KO	1
KO	2
KO	0
KO	0
KO	1
KO	1
KO	2
KO	3
KO	0
KO	1
KO	1
KO	1
KO	0
KO	0
KO	0
KO	0
KO	1
KO	3
KO	2
KO	3
KO	1
KO	0
KO	1
KO	1
KO	0
KO	1
KO	1
KO	1
KO	1
KO	0
KO	0
KO	0
KO	2
KO	1
KO	0
KO	0
KO	0
KO	1
KO	2
KO	1
KO	0
KO	0
KO	1
KO	0
KO	0
KO	1
KO	0
KO	3
KO	0
KO	1
KO	1
KO	0
KO	0
KO	0
KO	0
KO	1
KO	0
KO	1
KO	2
KO	1
KO	0
KO	2
KO	0
KO	0
KO	1
KO	1
KO	0
KO	0
KO	0
KO	0
KO	1
KO	0
KO	1
KO	1
KO	0
KO	0
KO	0
KO	0
KO	1
KO	0
KO	0
KO	0
KO	3
KO	0
KO	0
KO	0
KO	0
KO	0
KO	0
KO	0
KO	0
KO	0
KO	0
KO	0
KO	1
KO	0
KO	0
KO	1
KO	1
KO	1
KO	0
KO	0
KO	0
KO	0
KO	1
KO	0
KO	0
KO	0
KO	5
KO	0
KO	0
KO	0
KO	3
KO	2
KO	1
KO	0
KO	0
KO	0
KO	0
KO	2
KO	1
KO	0
KO	1
KO	3
KO	1
KO	1
KO	0
KO	0
KO	0
KO	1
KO	1
KO	5
KO	0
KO	0
KO	0
KO	0
KO	2
KO	0
KO	1
KO	0
KO	0
KO	0
KO	0
KO	0
KO	0
KO	0
KO	0
KO	0
KO	0
KO	0
KO	0
KO	1
KO	0
KO	3
KO	0
KO	0
KO	0
KO	0
KO	0
KO	2
KO	0
KO	0
KO	0
KO	1
KO	0
KO	0
KO	2
KO	3
KO	0
KO	2
KO	0
