# Supplementary material for: Deconstructing cold-induced brown adipocyte neogenesis in mice
Source: eLife. 2022 Jul 18;11:e80167. doi: 10.7554/eLife.80167 (PMC9348851; doi:10.7554/eLife.80167)
Supplement: Figure 5—source data 1. — Figure 5—figure supplement 1—source data 1. Quantification of the number of Adrb1 molecules in Nnat+ cells between WT and Adrb1 KO samples. [file elife-80167-fig5-data1.xlsx]

## Sheet: Gpnmb
Figure 5-Source Data 1. Quantitative PCR analysis of proliferation and immune cell activation genes in iBAT of WT or Adrb1 KO mice maintained at room temperature or exposed to cold for four days (n=10-11 animals per condition).
mRNA levels were normalized to %Rplp0.
Gpnmb Expression
	WT_1	WT_2	WT_3	WT_4	WT_5	WT_6	WT_7	WT_8	WT_9	WT_10	WT_11	KO_1	KO_2	KO_3	KO_4	KO_5	KO_6	KO_7	KO_8	KO_9	KO_10	KO_11
RT	0.594819	0.926924	0.845097	0.562733	0.732308	0.4973	1.20904	0.795825	0.349619	0.483143	0.708999	1.0501	1.20068	0.667662	0.716409	0.320232	0.471019	0.704916	0.391981	0.639725	1.13068	0.714756
COLD	1.665	1.49539	0.765172	2.55004	10.3785	12.1301	29.1183	5.10009	5.56812	1.26622	1.7337	5.80457	2.15924	1.26475	1.14382	23.1647	14.0308	1.30181	1.02611	0.837323	3.36481

## Sheet: Birc5
Figure 5-Source Data 1. Quantitative PCR analysis of proliferation and immune cell activation genes in iBAT of WT or Adrb1 KO mice maintained at room temperature or exposed to cold for four days (n=10-11 animals per condition).
mRNA levels were normalized to %Rplp0.
Birc5 Expression
	WT_1	WT_2	WT_3	WT_4	WT_5	WT_6	WT_7	WT_8	WT_9	WT_10	WT_11	KO_1	KO_2	KO_3	KO_4	KO_5	KO_6	KO_7	KO_8	KO_9	KO_10	KO_11
RT	0.0735833	0.129156	0.0672428	0.0794132	0.162351	0.0734984	0.115331	0.225916	0.0776891	0.0695337	0.0894478	0.11427	0.0757395	0.0747831	0.0673983	0.0854085	0.0818347	0.185633	0.0850147	0.117483	0.243252	0.0914328
COLD	0.530536	0.655434	0.278778	1.05985	1.50579	2.20461	1.7337	1.09216	1.18552	0.486504	0.446642	0.55627	0.431427	0.130205	0.707363	1.56611	1.20904	0.552427	0.146827	0.427459	0.534844

## Sheet: Top2a
Figure 5-Source Data 1. Quantitative PCR analysis of proliferation and immune cell activation genes in iBAT of WT or Adrb1 KO mice maintained at room temperature or exposed to cold for four days (n=10-11 animals per condition).
mRNA levels were normalized to %Rplp0.
Top2a Expression
	WT_1	WT_2	WT_3	WT_4	WT_5	WT_6	WT_7	WT_8	WT_9	WT_10	WT_11	KO_1	KO_2	KO_3	KO_4	KO_5	KO_6	KO_7	KO_8	KO_9	KO_10	KO_11
RT	0.015469	0.0344073	0.0290669	0.0230438	0.0418254	0.018481	0.0260758	0.0679455	0.0186958	0.0195574	0.0237465	0.0345666	0.0198763	0.0192214	0.0228582	0.0211557	0.0191549	0.068894	0.0233385	0.0335051	0.101334	0.024927
COLD	0.334603	0.377755	0.125625	0.605916	0.891222	0.968522	0.922651	0.507163	0.601036	0.243252	0.199416	0.295014	0.252413	0.0655553	0.413853	0.939863	0.688816	0.314367	0.0660876	0.222291	0.247504

## Sheet: Trem2
Figure 5-Source Data 1. Quantitative PCR analysis of proliferation and immune cell activation genes in iBAT of WT or Adrb1 KO mice maintained at room temperature or exposed to cold for four days (n=10-11 animals per condition).
mRNA levels were normalized to %Rplp0.
Trem2 Expression
	WT_1	WT_2	WT_3	WT_4	WT_5	WT_6	WT_7	WT_8	WT_9	WT_10	WT_11	KO_1	KO_2	KO_3	KO_4	KO_5	KO_6	KO_7	KO_8	KO_9	KO_10	KO_11
RT	0.00674105	0.015996	0.0087927	0.00929405	0.0108627	0.00404547	0.0107752	0.010147	0.00593662	0.0117098	0.0103841	0.0165793	0.0103961	0.0114688	0.0176261	0.00437103	0.00839564	0.011887	0.00538759	0.00968873	0.0107503	0.0100536
COLD	0.0693732	0.0629575	0.0363691	0.103463	0.113481	0.110633	0.207405	0.0842326	0.0597682	0.0283702	0.0790471	0.144973	0.0743524	0.0218512	0.0565442	0.245794	0.0952055	0.0287995	0.0230704	0.0287331	0.0356618
