# Supplementary material for: Deconstructing cold-induced brown adipocyte neogenesis in mice
Source: eLife. 2022 Jul 18;11:e80167. doi: 10.7554/eLife.80167 (PMC9348851; doi:10.7554/eLife.80167)
Supplement: Figure 8—source data 1. [file elife-80167-fig8-data1.xlsx]

## Sheet: H2Ab1Top2a_SUMMARY
Figure 8–Source Data 1. Quantification of the nearest neighbor (20 µM) to either a H2-Ab1+, Dcn+, or Dcn+Top2A+ cell in the iBAT of cold-exposed mice.
SUMMARY									SUMMARY
H2-Ab1+ Cells					of cells with neighbors				Dcn+Top2a+ Cells				of cells with neighbors
Animal #	# of H2-Ab1 Cells	# of H2-Ab1+ cells with no neighbor	% of cells with no neighbor	Dcn Neighbor	DcnTop2a Neighbor	H2-Ab1 Neighbor			Animal #	# of Dcn+Top2a+ Cells	# Dcn+Top2a+ cells with no neighbor	% of cells with no neighbor	Dcn Neighbor	DcnTop2a Neighbor	H2-Ab1 Neighbor
Animal 1	252	68	26.9841	60.9873	16.9384	22.0743			Animal 1	111	63	56.7568	15.625	42.1181	42.2569
Animal 2	270	147	54.4444	64.3443	12.7049	22.9508			Animal 2	100	64	64	8.33333	41.6667	50
Animal 3	144	38	26.3889	66.8847	17.9128	15.2025			Animal 3	106	63	59.434	15.8915	67.4419	16.6667

## Sheet: H2Ab1Top2a_Animal1
Cells within a 20 um neighborhood of an H2-Ab1+ Cell							Percent of Neighbors that are:					SUMMARY
H2-Ab1+ Cell Number	Dcn Neighbor	DcnTop2a Neighbor	H2-Ab1 Neighbor			Total Number of Neighbors	Dcn Neighbor	DcnTop2a Neighbor	H2-Ab1 Neighbor			H2-Ab1+ Cells					of cells with neighbors
1						0						Animal #	# of H2-Ab1 Cells	# of H2-Ab1+ cells with no neighbor	% of cells with no neighbor	Dcn Neighbor	DcnTop2a Neighbor	H2-Ab1 Neighbor
2		1				1	0	100	0			Animal 1	252	68	26.9841	60.9873	16.9384	22.0743
3			1			1	0	0	100
4			1			1	0	0	100
5						0						Dcn+Top2a+ Cells				of cells with neighbors
6		1				1	0	100	0			Animal #	# of Dcn+Top2a+ Cells	# Dcn+Top2a+ cells with no neighbor	% of cells with no neighbor	Dcn Neighbor	DcnTop2a Neighbor	H2-Ab1 Neighbor
7		1				1	0	100	0			Animal 1	111	63	56.7568	15.625	42.1181	42.2569
8		1				1	0	100	0
9						0
10	1					1	100	0	0
11						0
12	1					1	100	0	0
13		1				1	0	100	0
14	1					1	100	0	0
15						0
16	1					1	100	0	0
17	2					2	100	0	0
18	1					1	100	0	0
19	1					1	100	0	0
20						0
21	1					1	100	0	0
22	2					2	100	0	0
23	1					1	100	0	0
24	1					1	100	0	0
25						0
26						0
27						0
28						0
29	1		1			2	50	0	50
30	1					1	100	0	0
31	1					1	100	0	0
32	1					1	100	0	0
33	1					1	100	0	0
34	1					1	100	0	0
35	1		2			3	33.3333	0	66.6667
36	1		3			4	25	0	75
37	1		1			2	50	0	50
38	1		2			3	33.3333	0	66.6667
39	1					1	100	0	0
40						0
41						0
42		1				1	0	100	0
43	1		1			2	50	0	50
44			1			1	0	0	100
45	1					1	100	0	0
46						0
47	1					1	100	0	0
48	1					1	100	0	0
49		1				1	0	100	0
50						0
51	1					1	100	0	0
52			1			1	0	0	100
53			1			1	0	0	100
54						0
55						0
56			1			1	0	0	100
57			1			1	0	0	100
58	1					1	100	0	0
59	1					1	100	0	0
60	1					1	100	0	0
61		1				1	0	100	0
62		1				1	0	100	0
63	1					1	100	0	0
64						0
65	2					2	100	0	0
66	1	1				2	50	50	0
67	1					1	100	0	0
68	1					1	100	0	0
69						0
70						0
71	1					1	100	0	0
72		1				1	0	100	0
73		1				1	0	100	0
74	1					1	100	0	0
75	1					1	100	0	0
76	1					1	100	0	0
77		1				1	0	100	0
78		1				1	0	100	0
79						0
80	1					1	100	0	0
81						0
82	1					1	100	0	0
83	1					1	100	0	0
84	1					1	100	0	0
85	2					2	100	0	0
86						0
87		2				2	0	100	0
88		1				1	0	100	0
89	1					1	100	0	0
90	1					1	100	0	0
91						0
92	1					1	100	0	0
93		1				1	0	100	0
94						0
95	1					1	100	0	0
96						0
97		1				1	0	100	0
98						0
99	2					2	100	0	0
100		1				1	0	100	0
101	1					1	100	0	0
102		1				1	0	100	0
103	1					1	100	0	0
104						0
105		1				1	0	100	0
106		1				1	0	100	0
107	3					3	100	0	0
108	1					1	100	0	0
109	1					1	100	0	0
110			1			1	0	0	100
111			1			1	0	0	100
112						0
113						0
114	1					1	100	0	0
115		1				1	0	100	0
116						0
117	1					1	100	0	0
118	1					1	100	0	0
119						0
120	2					2	100	0	0
121	1					1	100	0	0
122						0
123						0
124	1		1			2	50	0	50
125	1		1			2	50	0	50
126						0
127						0
128						0
129	1		1			2	50	0	50
130	1		1			2	50	0	50
131	1		1			2	50	0	50
132	1	1	1			3	33.3333	33.3333	33.3333
133	1					1	100	0	0
134						0
135						0
136			1			1	0	0	100
137	1					1	100	0	0
138	1		1			2	50	0	50
139	2					2	100	0	0
140			3			3	0	0	100
141			2			2	0	0	100
142			2			2	0	0	100
143			3			3	0	0	100
144			2			2	0	0	100
145		1	2			3	0	33.3333	66.6667
146			1			1	0	0	100
147	1		1			2	50	0	50
148						0
149						0
150						0
151						0
152		1				1	0	100	0
153	1					1	100	0	0
154						0
155	2		3			5	40	0	60
156	1		2			3	33.3333	0	66.6667
157	2		3			5	40	0	60
158	1		1			2	50	0	50
159	1					1	100	0	0
160	2		1			3	66.6667	0	33.3333
161	2		1			3	66.6667	0	33.3333
162						0
163						0
164						0
165	1	1				2	50	50	0
166	1					1	100	0	0
167	1					1	100	0	0
168						0
169	1					1	100	0	0
170						0
171	1					1	100	0	0
172						0
173	1					1	100	0	0
174	1					1	100	0	0
175						0
176	1					1	100	0	0
177						0
178						0
179		1				1	0	100	0
180	1					1	100	0	0
181	1					1	100	0	0
182	1					1	100	0	0
183		1				1	0	100	0
184						0
185	1					1	100	0	0
186						0
187	1					1	100	0	0
188	1		1			2	50	0	50
189						0
190						0
191	1					1	100	0	0
192			1			1	0	0	100
193	1		1			2	50	0	50
194	1					1	100	0	0
195	1					1	100	0	0
196	1		1			2	50	0	50
197			1			1	0	0	100
198	1		1			2	50	0	50
199			1			1	0	0	100
200	1		1			2	50	0	50
201	1					1	100	0	0
202						0
203			1			1	0	0	100
204		1				1	0	100	0
205		1				1	0	100	0
206	1					1	100	0	0
207						0
208			1			1	0	0	100
209	1					1	100	0	0
210	1					1	100	0	0
211						0
212						0
213	2					2	100	0	0
214		1				1	0	100	0
215	1					1	100	0	0
216	1					1	100	0	0
217	1					1	100	0	0
218	1					1	100	0	0
219		1	1			2	0	50	50
220		1	1			2	0	50	50
221	2					2	100	0	0
222						0
223	1					1	100	0	0
224	1					1	100	0	0
225	1					1	100	0	0
226	1					1	100	0	0
227						0
228	1					1	100	0	0
229						0
230	1		1			2	50	0	50
231	1					1	100	0	0
232	1		1			2	50	0	50
233	1		1			2	50	0	50
234	1		1			2	50	0	50
235			1			1	0	0	100
236	1					1	100	0	0
237	1					1	100	0	0
238	1					1	100	0	0
239						0
240	1					1	100	0	0
241	1					1	100	0	0
242	1		1			2	50	0	50
243	1		1			2	50	0	50
244	1		1			2	50	0	50
245	1		1			2	50	0	50
246						0
247						0
248	1					1	100	0	0
249	1	1				2	50	50	0
250	1					1	100	0	0
251						0
252						0
							60.9873	16.9384	22.0743
Cells within a 20 um neighborhood of an Dcn+Top2a+ Cell							Percent of Neighbors that are:
Dcn+Top2a+ Cell Number	Dcn Neighbor	DcnTop2a Neighbor	H2-Ab1 Neighbor			Total Number of Neighbors	Dcn Neighbor	DcnTop2a Neighbor	H2-Ab1 Neighbor
1			1			1	0	0	100
2			1			1	0	0	100
3			1			1	0	0	100
4			1			1	0	0	100
5			1			1	0	0	100
6			1			1	0	0	100
7			0			0
8			0			0
9			1			1	0	0	100
10			0			0
11			0			0
12			0			0
13			0			0
14			1			1	0	0	100
15	1		1			2	50	0	50
16			0			0
17			0			0
18			0			0
19			0			0
20			0			0
21	1		0			1	100	0	0
22		1	0			1	0	100	0
23		1	0			1	0	100	0
24			0			0
25			1			1	0	0	100
26			0			0
27			0			0
28	1		0			1	100	0	0
29	1		2			3	33.3333	0	66.6667
30			0			0
31			0			0
32			0			0
33		1	0			1	0	100	0
34		1	0			1	0	100	0
35			1			1	0	0	100
36			0			0
37			2			2	0	0	100
38		1	1			2	0	50	50
39	2		1			3	66.6667	0	33.3333
40		1	0			1	0	100	0
41		2	0			2	0	100	0
42		2	0			2	0	100	0
43		1	0			1	0	100	0
44			0			0
45		1	0			1	0	100	0
46		1	0			1	0	100	0
47			0			0
48			0			0
49			0			0
50			0			0
51			0			0
52			0			0
53			0			0
54			0			0
55			0			0
56			0			0
57		1	0			1	0	100	0
58		1	0			1	0	100	0
59		2	1			3	0	66.6667	33.3333
60		4	1			5	0	80	20
61		3	1			4	0	75	25
62		3	1			4	0	75	25
63		3	1			4	0	75	25
64			0			0
65			1			1	0	0	100
66			0			0
67			0			0
68			0			0
69	1		0			1	100	0	0
70			0			0
71			0			0
72			0			0
73			0			0
74			0			0
75			0			0
76			0			0
77			0			0
78			1			1	0	0	100
79	1		1			2	50	0	50
80			0			0
81			0			0
82			0			0
83			1			1	0	0	100
84			0			0
85			0			0
86		1	0			1	0	100	0
87			0			0
88			0			0
89			0			0
90			0			0
91			0			0
92			0			0
93			0			0
94			0			0
95			0			0
96			0			0
97			1			1	0	0	100
98			1			1	0	0	100
99		1	1			2	0	50	50
100		1	0			1	0	100	0
101			0			0
102		1	0			1	0	100	0
103	1	1	0			2	50	50	0
104			0			0
105			0			0
106			0			0
107			0			0
108			0			0
109	1		0			1	100	0	0
110	1		0			1	100	0	0
111			0			0
							15.625	42.1181	42.2569

## Sheet: H2Ab1Top2a_Animal2
Cells within a 20 um neighborhood of an H2-Ab1+ Cell							Percent of Neighbors that are:						SUMMARY
H2-Ab1+ Cell Number	Dcn Neighbor	DcnTop2a Neighbor	H2-Ab1 Neighbor			Total Number of Neighbors	Dcn Neighbor	DcnTop2a Neighbor	H2-Ab1 Neighbor				H2-Ab1+ Cells					of cells with neighbors
1						0							Animal #	# of H2-Ab1 Cells	# of H2-Ab1+ cells with no neighbor	% of cells with no neighbor	Dcn Neighbor	DcnTop2a Neighbor	H2-Ab1 Neighbor
2	1					1	100	0	0				Animal 2	270	147	54.4444	64.3443	12.7049	22.9508
3						0
4	1					1	100	0	0
5	1					1	100	0	0				Dcn+Top2a+ Cells				of cells with neighbors
6			1			1	0	0	100				Animal #	# of Dcn+Top2a+ Cells	# Dcn+Top2a+ cells with no neighbor	% of cells with no neighbor	Dcn Neighbor	DcnTop2a Neighbor	H2-Ab1 Neighbor
7			1			1	0	0	100				Animal 2	100	64	64	8.33333	41.6667	50
8						0
9	1					1	100	0	0
10						0
11						0
12						0
13						0
14	1					1	100	0	0
15	1					1	100	0	0
16						0
17	1					1	100	0	0
18	1					1	100	0	0
19						0
20						0
21						0
22						0
23	1					1	100	0	0
24						0
25	1					1	100	0	0
26			1			1	0	0	100
27	1					1	100	0	0
28	1					1	100	0	0
29	1		2			3	33.3333	0	66.6667
30	1		2			3	33.3333	0	66.6667
31	1		2			3	33.3333	0	66.6667
32	1		1			2	50	0	50
33	1		1			2	50	0	50
34						0
35	1					1	100	0	0
36						0
37						0
38						0
39			1			1	0	0	100
40			1			1	0	0	100
41	1					1	100	0	0
42	1					1	100	0	0
43	2					2	100	0	0
44						0
45						0
46						0
47	1					1	100	0	0
48						0
49						0
50			1			1	0	0	100
51			1			1	0	0	100
52						0
53	1					1	100	0	0
54						0
55			1			1	0	0	100
56			1			1	0	0	100
57						0
58						0
59		2				2	0	100	0
60						0
61						0
62	1		1			2	50	0	50
63			1			1	0	0	100
64						0
65						0
66						0
67						0
68						0
69						0
70		2				2	0	100	0
71	1					1	100	0	0
72	1					1	100	0	0
73						0
74						0
75	1					1	100	0	0
76						0
77						0
78						0
79						0
80	1					1	100	0	0
81						0
82						0
83						0
84						0
85	1					1	100	0	0
86		1				1	0	100	0
87		1				1	0	100	0
88						0
89	1					1	100	0	0
90						0
91		1				1	0	100	0
92	1					1	100	0	0
93						0
94	1		1			2	50	0	50
95						0
96		1				1	0	100	0
97						0
98			1			1	0	0	100
99			1			1	0	0	100
100						0
101						0
102						0
103	1					1	100	0	0
105	1		1			2	50	0	50
106	1					1	100	0	0
107						0
108			1			1	0	0	100
109			1			1	0	0	100
110						0
111		1				1	0	100	0
112						0
113		1				1	0	100	0
114		1				1	0	100	0
115						0
116	1					1	100	0	0
117	1					1	100	0	0
118						0
119						0
120	1					1	100	0	0
121			1			1	0	0	100
122			1			1	0	0	100
123	1					1	100	0	0
124						0
125						0
126	1					1	100	0	0
127		1				1	0	100	0
128						0
129						0
130						0
131						0
132						0
133						0
134	2					2	100	0	0
135						0
136	1					1	100	0	0
137						0
138	1					1	100	0	0
139						0
140	1					1	100	0	0
141						0
142						0
143						0
144						0
145						0
146						0
147						0
148						0
149						0
150		1				1	0	100	0
151	1					1	100	0	0
152		1				1	0	100	0
153						0
154						0
155	1	1				2	50	50	0
156	1					1	100	0	0
157	2					2	100	0	0
158	1					1	100	0	0
159	2					2	100	0	0
160						0
161	1					1	100	0	0
162	1					1	100	0	0
163						0
164	1					1	100	0	0
165						0
166	1					1	100	0	0
167						0
168						0
169		1				1	0	100	0
170						0
171						0
172	1					1	100	0	0
173						0
174						0
175	1		1			2	50	0	50
176			1			1	0	0	100
177	1					1	100	0	0
178						0
179						0
180						0
181	1					1	100	0	0
182						0
183						0
184						0
185						0
186						0
187						0
188						0
189	1					1	100	0	0
190						0
191						0
192						0
193						0
194						0
195						0
196						0
197						0
198	1					1	100	0	0
199						0
200	1					1	100	0	0
201						0
202						0
203	1					1	100	0	0
204						0
205	1					1	100	0	0
206	1					1	100	0	0
207						0
208						0
209	1					1	100	0	0
210	1					1	100	0	0
211	1					1	100	0	0
212	1					1	100	0	0
213						0
214	2					2	100	0	0
215						0
216						0
217						0
218	1					1	100	0	0
219						0
220	1					1	100	0	0
221						0
222		1				1	0	100	0
223						0
224	1					1	100	0	0
225						0
226						0
227	1					1	100	0	0
228						0
229						0
230	1					1	100	0	0
231	1					1	100	0	0
232	1					1	100	0	0
233						0
234	1		1			2	50	0	50
235	1		1			2	50	0	50
236	1					1	100	0	0
237			1			1	0	0	100
238			1			1	0	0	100
239						0
240	1					1	100	0	0
241		1				1	0	100	0
242						0
243						0
244						0
245			1			1	0	0	100
246			2			2	0	0	100
247			1			1	0	0	100
248	1					1	100	0	0
249						0
250						0
251	1					1	100	0	0
252						0
253						0
254						0
255						0
256						0
257						0
258						0
259	1					1	100	0	0
260						0
261	1					1	100	0	0
262						0
263						0
264						0
265	1					1	100	0	0
266						0
267						0
268						0
269						0
270						0
							64.3443	12.7049	22.9508
Cells within a 20 um neighborhood of an Dcn+Top2a+ Cell							Percent of Neighbors that are:
Dcn+Top2a+ Cell Number	Dcn Neighbor	DcnTop2a Neighbor	H2-Ab1 Neighbor			Total Number of Neighbors	Dcn Neighbor	DcnTop2a Neighbor	H2-Ab1 Neighbor
1						0
2						0
3			1			1	0	0	100
4						0
5						0
6						0
7			1			1	0	0	100
8						0
9						0
10	1					1	100	0	0
11						0
12		1	1			2	0	50	50
13		1	1			2	0	50	50
14						0
15			1			1	0	0	100
16			1			1	0	0	100
17						0
18						0
19						0
20						0
21			1			1	0	0	100
22						0
23						0
24						0
25						0
26						0
27			1			1	0	0	100
28						0
29			1			1	0	0	100
30						0
31						0
32	1					1	100	0	0
33						0
34			1			1	0	0	100
35		1				1	0	100	0
36		1				1	0	100	0
37						0
38						0
39						0
40						0
41			1			1	0	0	100
42						0
43						0
44						0
45			1			1	0	0	100
46						0
47			1			1	0	0	100
48		1				1	0	100	0
49		1				1	0	100	0
50						0
51						0
52		1				1	0	100	0
53						0
54						0
55						0
56		1				1	0	100	0
57		1	1			2	0	50	50
58		1	1			2	0	50	50
59						0
60			1			1	0	0	100
61						0
62						0
63						0
64			1			1	0	0	100
65						0
66						0
67						0
68						0
69						0
70						0
71						0
72						0
73		1				1	0	100	0
74		1	1			2	0	50	50
75						0
76						0
77			1			1	0	0	100
78						0
79						0
80						0
81						0
82						0
83						0
84						0
85						0
86						0
87						0
88		1				1	0	100	0
89		1				1	0	100	0
90	1					1	100	0	0
91			1			1	0	0	100
92						0
93						0
94		1				1	0	100	0
95		1				1	0	100	0
96						0
97		1	1			2	0	50	50
98		1				1	0	100	0
99						0
100						0
							8.33333	41.6667	50

## Sheet: H2Ab1Top2a_Animal3
Cells within a 20 um neighborhood of an H2-Ab1+ Cell							Percent of Neighbors that are:						SUMMARY
H2-Ab1+ Cell Number	Dcn Neighbor	DcnTop2a Neighbor	H2-Ab1 Neighbor			Total Number of Neighbors	Dcn Neighbor	DcnTop2a Neighbor	H2-Ab1 Neighbor				H2-Ab1+ Cells					of cells with neighbors
1						0							Animal #	# of H2-Ab1 Cells	# of H2-Ab1+ cells with no neighbor	% of cells with no neighbor	Dcn Neighbor	DcnTop2a Neighbor	H2-Ab1 Neighbor
2	1					1	100	0	0				Animal 3	144	38	26.3889	66.8847	17.9128	15.2025
3	1					1	100	0	0
4	1					1	100	0	0
5	1					1	100	0	0				Dcn+Top2a+ Cells				of cells with neighbors
6	1					1	100	0	0				Animal #	# of Dcn+Top2a+ Cells	# Dcn+Top2a+ cells with no neighbor	% of cells with no neighbor	Dcn Neighbor	DcnTop2a Neighbor	H2-Ab1 Neighbor
7	1					1	100	0	0				Animal 3	106	63	59.434	15.8915	67.4419	16.6667
8						0
9	1					1	100	0	0
10	1					1	100	0	0
11	1					1	100	0	0
12						0
13		1				1	0	100	0
14						0
15						0
16	3					3	100	0	0
17	1	1				2	50	50	0
18						0
19	1	1				2	50	50	0
20						0
21		1				1	0	100	0
22		1				1	0	100	0
23	1					1	100	0	0
24	1					1	100	0	0
25			1			1	0	0	100
26			1			1	0	0	100
27	1					1	100	0	0
28	2	1				3	66.6667	33.3333	0
29			1			1	0	0	100
30			1			1	0	0	100
31		1				1	0	100	0
32		1				1	0	100	0
33	1	1				2	50	50	0
34		1				1	0	100	0
35						0
36	1					1	100	0	0
37			1			1	0	0	100
38			1			1	0	0	100
39	1					1	100	0	0
40	1					1	100	0	0
41		2				2	0	100	0
42	1	1				2	50	50	0
43		1	1			2	0	50	50
44	1		0			1	100	0	0
45	1					1	100	0	0
46	1					1	100	0	0
47	1					1	100	0	0
48	1					1	100	0	0
49	1	1				2	50	50	0
50						0
51			1			1	0	0	100
52						0
53		1				1	0	100	0
54						0
55	1					1	100	0	0
56						0
57	1					1	100	0	0
58	1					1	100	0	0
59		1				1	0	100	0
60						0
61	2		2			4	50	0	50
62	1		3			4	25	0	75
63	2		3			5	40	0	60
64			1			1	0	0	100
65	1					1	100	0	0
66	1					1	100	0	0
67						0
68						0
69	1					1	100	0	0
70	1	1				2	50	50	0
71	1					1	100	0	0
72	1					1	100	0	0
73						0
74	1					1	100	0	0
75						0
76	2		1			3	66.6667	0	33.3333
77	2		1			3	66.6667	0	33.3333
78	1					1	100	0	0
79						0
80	1					1	100	0	0
81		1				1	0	100	0
82						0
83						0
84	1					1	100	0	0
85	1					1	100	0	0
86						0
87						0
88			1			1	0	0	100
89	1					1	100	0	0
90	1					1	100	0	0
91	1					1	100	0	0
92						0
93						0
94	1					1	100	0	0
95	2					2	100	0	0
96	1					1	100	0	0
97		1				1	0	100	0
98						0
99	1					1	100	0	0
100	1					1	100	0	0
101	1					1	100	0	0
102						0
103	2					2	100	0	0
104	1					1	100	0	0
105	1					1	100	0	0
106						0
107						0
108	2		1			3	66.6667	0	33.3333
109	2		1			3	66.6667	0	33.3333
110	1		1			2	50	0	50
111	1					1	100	0	0
112		1	1			2	0	50	50
113	1	1	1			3	33.3333	33.3333	33.3333
114	1	2	1			4	25	50	25
115	1					1	100	0	0
116						0
117	1					1	100	0	0
118	1					1	100	0	0
119	1					1	100	0	0
120			1			1	0	0	100
121			1			1	0	0	100
122	1					1	100	0	0
123						0
124		2				2	0	100	0
125	1					1	100	0	0
126	1					1	100	0	0
127	1					1	100	0	0
128	1					1	100	0	0
129		1				1	0	100	0
130	1					1	100	0	0
131	1					1	100	0	0
132	1					1	100	0	0
133	1					1	100	0	0
134						0
135						0
136						0
137		1				1	0	100	0
138						0
139						0
140						0
141	1					1	100	0	0
142	1					1	100	0	0
143	1					1	100	0	0
144						0
							66.8847	17.9128	15.2025
Cells within a 20 um neighborhood of an Dcn+Top2a+ Cell							Percent of Neighbors that are:
Dcn+Top2a+ Cell Number	Dcn Neighbor	DcnTop2a Neighbor	H2-Ab1 Neighbor			Total Number of Neighbors	Dcn Neighbor	DcnTop2a Neighbor	H2-Ab1 Neighbor
1						0
2						0
3			1			1	0	0	100
4						0
5		1				1	0	100	0
6		1				1	0	100	0
7		1				1	0	100	0
8		1				1	0	100	0
9						0
10						0
11	1					1	100	0	0
12		2				2	0	100	0
13		2				2	0	100	0
14		2				2	0	100	0
15		1				1	0	100	0
16						0
17						0
18						0
19		1				1	0	100	0
20		1				1	0	100	0
21	1	1				2	50	50	0
22						0
23						0
24						0
25						0
26						0
27						0
28						0
29						0
30	1		1			2	50	0	50
31		1				1	0	100	0
32		1				1	0	100	0
33						0
34						0
35		1				1	0	100	0
36						0
37		1				1	0	100	0
38		1				1	0	100	0
39						0
40						0
41		1				1	0	100	0
42						0
43						0
44						0
45		1				1	0	100	0
46						0
47						0
48						0
49		1				1	0	100	0
50		1				1	0	100	0
51						0
52						0
53						0
54	1		2			3	33.3333	0	66.6667
55	1		1			2	50	0	50
56						0
57	1					1	100	0	0
58						0
59			1			1	0	0	100
60						0
61						0
62		1				1	0	100	0
63						0
64						0
65						0
66	1		1			2	50	0	50
67						0
68						0
69						0
70						0
71		1				1	0	100	0
72		1				1	0	100	0
73			1			1	0	0	100
74						0
75						0
76						0
77		1				1	0	100	0
78						0
79		1				1	0	100	0
80						0
81						0
82						0
83						0
84	1		1			2	50	0	50
85	1					1	100	0	0
86						0
87						0
88		2				2	0	100	0
89		2				2	0	100	0
90		2				2	0	100	0
91						0
92			1			1	0	0	100
93						0
94						0
95	1					1	100	0	0
96		1	1			2	0	50	50
97		1				1	0	100	0
98						0
99						0
100						0
101						0
102						0
103						0
104						0
105						0
106						0
							15.8915	67.4419	16.6667
