# Supplementary material for: Deconstructing cold-induced brown adipocyte neogenesis in mice
Source: eLife. 2022 Jul 18;11:e80167. doi: 10.7554/eLife.80167 (PMC9348851; doi:10.7554/eLife.80167)
Supplement: Figure 8—source data 2. [file elife-80167-fig8-data2.xlsx]

## Sheet: H2Ab1Nnat_SUMMARY
Figure 8–Source Data 2. Quantification of the nearest neighbor (20 µM) to either a H2-Ab1+, Dcn+, or Nnat+ cell in the iBAT of cold-exposed mice.
SUMMARY
H2-Ab1+ Cells				of cells with neighbors					Nnat+ Cells				of cells with neighbors
Animal #	# of H2-Ab1+ Cells	# of H2-Ab1+ cells with no neighbor	% of cells with no neighbor	Dcn Neighbor	H2-Ab1 neighbor	Nnat neighbor			Animal #	# of Nnat+ Cells	# Nnat+ cells with no neighbor	% of cells with no neighbor	Dcn Neighbor	H2-Ab1 neighbor	Nnat neighbor
Animal 1	360	93	25.8333	49.5069	34.7628	15.7303			Animal 1	252	109	43.254	10.1981	16.7249	73.0769
Animal 2	224	74	33.0357	68.3445	22.0358	9.61969			Animal 2	112	52	46.4286	18.7222	18.6111	62.6667
Animal 3	212	72	33.9623	61.5714	29.619	8.80952			Animal 3	124	73	58.871	18.3007	11.7647	69.9346

## Sheet: H2Ab1Nnat_Animal1
Cells within a 20 um neighborhood of an H2-Ab1+ Cell							Percent of Neighbors that are:						SUMMARY
H2-Ab1+ Cell Number	Dcn Neighbor	H2-Ab1 neighbor	Nnat neighbor			Total Number of Neighbors	Dcn Neighbor	H2-Ab1 neighbor	Nnat neighbor				H2-Ab1+ Cells				of cells with neighbors
1	1	1				2	50	50	0				Animal #	# of H2-Ab1+ Cells	# of H2-Ab1+ cells with no neighbor	% of cells with no neighbor	Dcn Neighbor	H2-Ab1 neighbor	Nnat neighbor
2	1	1				2	50	50	0				Animal 1	360	93	25.8333	49.5069	34.7628	15.7303
3	1	1				2	50	50	0
4		1				1	0	100	0
5	1					1	100	0	0
6	1					1	100	0	0
7	1					1	100	0	0				Nnat+ Cells				of cells with neighbors
8	1					1	100	0	0				Animal #	# of Nnat+ Cells	# Nnat+ cells with no neighbor	% of cells with no neighbor	Dcn Neighbor	H2-Ab1 neighbor	Nnat neighbor
9	1					1	100	0	0				Animal 1	252	109	43.254	10.1981	16.7249	73.0769
10			1			1	0	0	100
11						0
12			2			2	0	0	100
13		1	1			2	0	50	50
14		2	1			3	0	66.6667	33.3333
15		1	1			2	0	50	50
16	1					1	100	0	0
17	1	2				3	33.3333	66.6667	0
18	2	2				4	50	50	0
19	2	2				4	50	50	0
20	1	2				3	33.3333	66.6667	0
21	1					1	100	0	0
22						0
23	1					1	100	0	0
24	1	1				2	50	50	0
25	1	1				2	50	50	0
26	1					1	100	0	0
27	1					1	100	0	0
28	1					1	100	0	0
29		1				1	0	100	0
30		1				1	0	100	0
31	2	2				4	50	50	0
32	2	2				4	50	50	0
33	2	2				4	50	50	0
34	1					1	100	0	0
35	2	1				3	66.6667	33.3333	0
36	1	1				2	50	50	0
37	1	1				2	50	50	0
38						0
39			3			3	0	0	100
40	1					1	100	0	0
41						0
42						0
43	1					1	100	0	0
44	2					2	100	0	0
45						0
46	1					1	100	0	0
47			2			2	0	0	100
48		1				1	0	100	0
49			1			1	0	0	100
50	1		1			2	50	0	50
51	2		1			3	66.6667	0	33.3333
52	2					2	100	0	0
53	1					1	100	0	0
54	1					1	100	0	0
55	1	1				2	50	50	0
56			1			1	0	0	100
57						0
58						0
59	1					1	100	0	0
60	1					1	100	0	0
61		1				1	0	100	0
62	2					2	100	0	0
63	1					1	100	0	0
64	1	1				2	50	50	0
65	1	1				2	50	50	0
66						0
67						0
68						0
69						0
70	1					1	100	0	0
71	3					3	100	0	0
72	2		1			3	66.6667	0	33.3333
73	1	1				2	50	50	0
74	1	1				2	50	50	0
75	1	1				2	50	50	0
76						0
77						0
78	1					1	100	0	0
79	1	1				2	50	50	0
80	2					2	100	0	0
81			2			2	0	0	100
82						0
83						0
84						0
85						0
86		1				1	0	100	0
87	1					1	100	0	0
88	1					1	100	0	0
89	1	1				2	50	50	0
90	1	1				2	50	50	0
91						0
92	1					1	100	0	0
93						0
94						0
95	1					1	100	0	0
96						0
97	1					1	100	0	0
98		1				1	0	100	0
99		1				1	0	100	0
100	1	1				2	50	50	0
101	1	1	1			3	33.3333	33.3333	33.3333
102		1	1			2	0	50	50
103			1			1	0	0	100
104		1				1	0	100	0
105			1			1	0	0	100
106						0
107	1					1	100	0	0
108						0
109						0
110			1			1	0	0	100
111	1	1				2	50	50	0
112	1	2				3	33.3333	66.6667	0
113	1	1				2	50	50	0
114						0
115	1					1	100	0	0
116						0
117	1					1	100	0	0
118						0
119		1				1	0	100	0
120		1				1	0	100	0
121	1					1	100	0	0
122						0
123			1			1	0	0	100
124	1		1			2	50	0	50
125	1					1	100	0	0
126	1					1	100	0	0
127	1					1	100	0	0
128						0
129						0
130						0
131	1					1	100	0	0
132			1			1	0	0	100
133						0
134						0
135						0
136	1					1	100	0	0
137						0
138						0
139	1					1	100	0	0
140		1				1	0	100	0
141		1				1	0	100	0
142	1	1				2	50	50	0
143	2	2				4	50	50	0
144						0
145	1					1	100	0	0
146	1		1			2	50	0	50
147	1		1			2	50	0	50
148	1					1	100	0	0
149	1					1	100	0	0
150	1					1	100	0	0
151	1		1			2	50	0	50
152	1					1	100	0	0
153						0
154						0
155	1					1	100	0	0
156	1					1	100	0	0
157	1					1	100	0	0
158	2					2	100	0	0
159	1		1			2	50	0	50
160			1			1	0	0	100
161	2	1				3	66.6667	33.3333	0
162	1					1	100	0	0
163	1					1	100	0	0
164	1		1			2	50	0	50
165		1				1	0	100	0
166		1				1	0	100	0
167						0
168	1					1	100	0	0
169			1			1	0	0	100
170		1	1			2	0	50	50
171		1	1			2	0	50	50
172			1			1	0	0	100
173		1				1	0	100	0
174		1				1	0	100	0
175			1			1	0	0	100
176	1					1	100	0	0
177	1	1				2	50	50	0
178	1	1				2	50	50	0
179		1				1	0	100	0
180		2				2	0	100	0
181		2				2	0	100	0
182		1				1	0	100	0
183			1			1	0	0	100
184						0
185	2					2	100	0	0
186						0
187						0
188		2				2	0	100	0
189	1		1			2	50	0	50
190	1		1			2	50	0	50
191			1			1	0	0	100
192		1	1			2	0	50	50
193		2	1			3	0	66.6667	33.3333
194		2	1			3	0	66.6667	33.3333
195		1	1			2	0	50	50
196	1	1				2	50	50	0
197			1			1	0	0	100
198	1	1				2	50	50	0
199	1	1				2	50	50	0
200						0
201		2				2	0	100	0
202	1	1				2	50	50	0
203	1	2				3	33.3333	66.6667	0
204			1			1	0	0	100
205	1					1	100	0	0
206		1	1			2	0	50	50
207		1				1	0	100	0
208			1			1	0	0	100
209						0
210	1					1	100	0	0
211						0
212			2			2	0	0	100
213						0
214						0
215						0
216						0
217		1				1	0	100	0
218		2				2	0	100	0
219						0
220	1					1	100	0	0
221	1					1	100	0	0
222	1					1	100	0	0
223	2	1				3	66.6667	33.3333	0
224						0
225	1	1				2	50	50	0
226	1	1				2	50	50	0
227	1	1				2	50	50	0
228	1	1				2	50	50	0
229		1				1	0	100	0
230		2				2	0	100	0
231		2				2	0	100	0
232		2				2	0	100	0
233	2	3				5	40	60	0
234	1	4				5	20	80	0
235		2				2	0	100	0
236	1	1				2	50	50	0
237	1	3				4	25	75	0
238		2				2	0	100	0
239		1				1	0	100	0
240	1					1	100	0	0
241						0
242		1				1	0	100	0
243		1				1	0	100	0
244						0
245						0
246						0
247	1					1	100	0	0
248	2	1				3	66.6667	33.3333	0
249	1					1	100	0	0
250						0
251						0
252		1				1	0	100	0
253		1				1	0	100	0
254						0
255						0
256		1				1	0	100	0
257		1				1	0	100	0
258		1				1	0	100	0
259			1			1	0	0	100
260						0
261						0
262	1					1	100	0	0
263	2					2	100	0	0
264	1	2				3	33.3333	66.6667	0
265	1	2				3	33.3333	66.6667	0
266	1	2				3	33.3333	66.6667	0
267	1					1	100	0	0
268						0
269						0
270	1					1	100	0	0
271						0
272		1				1	0	100	0
273		2				2	0	100	0
274		1				1	0	100	0
275			1			1	0	0	100
276						0
277	1	1				2	50	50	0
278	1	1				2	50	50	0
279						0
280	1	1				2	50	50	0
281						0
282	2	1				3	66.6667	33.3333	0
283	2	1				3	66.6667	33.3333	0
284	1					1	100	0	0
285						0
286	1					1	100	0	0
287						0
288		1				1	0	100	0
289						0
290	1					1	100	0	0
291						0
292						0
293	1					1	100	0	0
294		1				1	0	100	0
295		1				1	0	100	0
296	2					2	100	0	0
297						0
298						0
299						0
300	1	1				2	50	50	0
301	1	1				2	50	50	0
302	1	1				2	50	50	0
303		1				1	0	100	0
304						0
305	1					1	100	0	0
306	1		1			2	50	0	50
307						0
308	1		1			2	50	0	50
309						0
310		1	1			2	0	50	50
311	1	1	1			3	33.3333	33.3333	33.3333
312						0
313						0
314						0
315		1				1	0	100	0
316		1				1	0	100	0
317						0
318	1	1				2	50	50	0
319	1	1				2	50	50	0
320	1					1	100	0	0
321	1					1	100	0	0
322	1					1	100	0	0
323	2					2	100	0	0
324	1					1	100	0	0
325	2					2	100	0	0
326						0
327	1					1	100	0	0
328						0
329	1	1				2	50	50	0
330	1					1	100	0	0
331	1					1	100	0	0
332	1					1	100	0	0
333	2					2	100	0	0
334	1	1	1			3	33.3333	33.3333	33.3333
335	1					1	100	0	0
336	2					2	100	0	0
337			1			1	0	0	100
338						0
339		1				1	0	100	0
340						0
341	1		1			2	50	0	50
342						0
343						0
344	2	2				4	50	50	0
345	2	1				3	66.6667	33.3333	0
346			1			1	0	0	100
347	1					1	100	0	0
348	1					1	100	0	0
349	1		1			2	50	0	50
350			1			1	0	0	100
351	1					1	100	0	0
352						0
353		1	2			3	0	33.3333	66.6667
354		1	2			3	0	33.3333	66.6667
355	1					1	100	0	0
356		1				1	0	100	0
357		1				1	0	100	0
358						0
359						0
360	1					1	100	0	0
							49.5069	34.7628	15.7303
Cells within a 20 um neighborhood of a Nnat+ Cell							Percent of Neighbors that are:
Nnat+ Cell Number	Dcn Neighbor	H2-Ab1 Neighbor	Nnat Neighbor			Total Number of Neighbors	Dcn Neighbor	H2-Ab1 Neighbor	Nnat Neighbor
1			1			1	0	0	100
2			1			1	0	0	100
3						0
4		1				1	0	100	0
5	1	3				4	25	75	0
6			1			1	0	0	100
7			1			1	0	0	100
8						0
9			2			2	0	0	100
10			2			2	0	0	100
11			2			2	0	0	100
12						0
13						0
14		1	1			2	0	50	50
15						0
16						0
17		1				1	0	100	0
18	1					1	100	0	0
19						0
20			1			1	0	0	100
21			2			2	0	0	100
22			1			1	0	0	100
23						0
24			2			2	0	0	100
25			2			2	0	0	100
26			2			2	0	0	100
27	1					1	100	0	0
28			1			1	0	0	100
29			1			1	0	0	100
30	1		1			2	50	0	50
31	1		1			2	50	0	50
32	1		1			2	50	0	50
33			2			2	0	0	100
34						0
35						0
36						0
37			1			1	0	0	100
38			1			1	0	0	100
39			1			1	0	0	100
40						0
41						0
42						0
43						0
44						0
45	1	1				2	50	50	0
46		2				2	0	100	0
47		2				2	0	100	0
48						0
49		2				2	0	100	0
50			2			2	0	0	100
51			2			2	0	0	100
52			1			1	0	0	100
53						0
54						0
55			1			1	0	0	100
56			1			1	0	0	100
57			1			1	0	0	100
58			1			1	0	0	100
59			1			1	0	0	100
60			1			1	0	0	100
61						0
62						0
63						0
64						0
65			1			1	0	0	100
66						0
67						0
68	1					1	100	0	0
69						0
70						0
71			1			1	0	0	100
72			1			1	0	0	100
73	1	1	1			3	33.3333	33.3333	33.3333
74	1	1	1			3	33.3333	33.3333	33.3333
75			1			1	0	0	100
76			1			1	0	0	100
77						0
78						0
79			1			1	0	0	100
80			1			1	0	0	100
81	1	1				2	50	50	0
82		1				1	0	100	0
83			1			1	0	0	100
84			1			1	0	0	100
85			1			1	0	0	100
86			1			1	0	0	100
87						0
88			1			1	0	0	100
89			2			2	0	0	100
90			1			1	0	0	100
91			1			1	0	0	100
92						0
93						0
94	1		1			2	50	0	50
95			1			1	0	0	100
96			1			1	0	0	100
97						0
98			1			1	0	0	100
99			1			1	0	0	100
100			2			2	0	0	100
101			2			2	0	0	100
102			2			2	0	0	100
103						0
104						0
105						0
106						0
107						0
108						0
109			1			1	0	0	100
110			1			1	0	0	100
111		1				1	0	100	0
112	1		2			3	33.3333	0	66.6667
113			3			3	0	0	100
114	1		2			3	33.3333	0	66.6667
115			3			3	0	0	100
116	1					1	100	0	0
117		1	1			2	0	50	50
118			1			1	0	0	100
119			1			1	0	0	100
120						0
121			2			2	0	0	100
122			2			2	0	0	100
123			2			2	0	0	100
124						0
125			1			1	0	0	100
126			1			1	0	0	100
127						0
128						0
129						0
130						0
131						0
132						0
133						0
134						0
135						0
136						0
137						0
138						0
139	1					1	100	0	0
140			1			1	0	0	100
141			1			1	0	0	100
142						0
143		1				1	0	100	0
144						0
145						0
146						0
147						0
148						0
149						0
150						0
151						0
152						0
153						0
154						0
155						0
156			1			1	0	0	100
157			1			1	0	0	100
158						0
159	1					1	100	0	0
160						0
161						0
162						0
163						0
164			1			1	0	0	100
165			2			2	0	0	100
166			1			1	0	0	100
167						0
168			1			1	0	0	100
169			2			2	0	0	100
170			1			1	0	0	100
171			1			1	0	0	100
172			1			1	0	0	100
173			1			1	0	0	100
174			1			1	0	0	100
175						0
176						0
177						0
178		1				1	0	100	0
179						0
180			1			1	0	0	100
181			1			1	0	0	100
182						0
183						0
184						0
185						0
186		1				1	0	100	0
187			1			1	0	0	100
188			1			1	0	0	100
189						0
190						0
191	1	1				2	50	50	0
192			1			1	0	0	100
193			2			2	0	0	100
194			1			1	0	0	100
195			1			1	0	0	100
196	1		1			2	50	0	50
197	1		1			2	50	0	50
198						0
199			1			1	0	0	100
200			1			1	0	0	100
201		1	1			2	0	50	50
202			1			1	0	0	100
203		1				1	0	100	0
204						0
205						0
206	1					1	100	0	0
207						0
208						0
209						0
210						0
211		1	1			2	0	50	50
212		1	1			2	0	50	50
213	1	1				2	50	50	0
214						0
215			1			1	0	0	100
216			1			1	0	0	100
217						0
218			1			1	0	0	100
219						0
220						0
221						0
222						0
223						0
224						0
225						0
226						0
227			1			1	0	0	100
228			1			1	0	0	100
229						0
230			1			1	0	0	100
231			1			1	0	0	100
232						0
233						0
234						0
235		1				1	0	100	0
236		1				1	0	100	0
237		1				1	0	100	0
238	1					1	100	0	0
239			1			1	0	0	100
240			1			1	0	0	100
241		1				1	0	100	0
242						0
243		1	1			2	0	50	50
244		1	1			2	0	50	50
245						0
246		1				1	0	100	0
247		1				1	0	100	0
248			1			1	0	0	100
249						0
250						0
251						0
252						0
							10.1981	16.7249	73.0769

## Sheet: H2Ab1Nnat_Animal2
Cells within a 20 um neighborhood of an H2-Ab1+ Cell							Percent of Neighbors that are:						SUMMARY
H2-Ab1+ Cell Number	Dcn Neighbor	H2-Ab1 neighbor	Nnat neighbor			Total Number of Neighbors	Dcn Neighbor	H2-Ab1 neighbor	Nnat neighbor				H2-Ab1+ Cells				of cells with neighbors
1	1					1	100	0	0				Animal #	# of H2-Ab1+ Cells	# of H2-Ab1+ cells with no neighbor	% of cells with no neighbor	Dcn Neighbor	H2-Ab1 neighbor	Nnat neighbor
2	1					1	100	0	0				Animal 2	224	74	33.0357	68.3445	22.0358	9.61969
3	1					1	100	0	0
4	1					1	100	0	0
5	2					2	100	0	0
6						0
7						0							Nnat+ Cells				of cells with neighbors
8						0							Animal #	# of Nnat+ Cells	# Nnat+ cells with no neighbor	% of cells with no neighbor	Dcn Neighbor	H2-Ab1 neighbor	Nnat neighbor
9						0							Animal 2	112	52	46.4286	18.7222	18.6111	62.6667
10	1					1	100	0	0
11	1					1	100	0	0
12	1					1	100	0	0
13	1					1	100	0	0
14	1					1	100	0	0
15						0
16						0
17						0
18						0
19						0
20	1					1	100	0	0
21	2	1				3	66.6667	33.3333	0
22	2	1				3	66.6667	33.3333	0
23	2	1				3	66.6667	33.3333	0
24	2	1				3	66.6667	33.3333	0
25	1					1	100	0	0
26			1			1	0	0	100
27	1	2				3	33.3333	66.6667	0
28	1	2				3	33.3333	66.6667	0
29		1				1	0	100	0
30						0
31						0
32		1				1	0	100	0
33	1	1				2	50	50	0
34	1					1	100	0	0
35	2					2	100	0	0
36	1					1	100	0	0
37	1		1			2	50	0	50
38	1		1			2	50	0	50
39						0
40						0
41		1				1	0	100	0
42		1				1	0	100	0
43	1					1	100	0	0
44						0
45						0
46						0
47			1			1	0	0	100
48	1					1	100	0	0
49						0
50						0
51	1					1	100	0	0
52	1					1	100	0	0
53						0
54						0
55						0
56	1					1	100	0	0
57						0
58	2					2	100	0	0
59						0
60						0
61	1					1	100	0	0
62						0
63	2					2	100	0	0
64	1	1				2	50	50	0
65	2					2	100	0	0
66	1					1	100	0	0
67						0
68	1					1	100	0	0
69						0
70						0
71						0
72	1					1	100	0	0
73						0
74		1				1	0	100	0
75		1				1	0	100	0
76	1					1	100	0	0
77						0
78	3	1				4	75	25	0
79	3	1				4	75	25	0
80		1				1	0	100	0
81		1				1	0	100	0
82						0
83	1					1	100	0	0
84			1			1	0	0	100
85	2	1				3	66.6667	33.3333	0
86	2	1				3	66.6667	33.3333	0
87						0
88						0
89	1					1	100	0	0
90	1					1	100	0	0
91		1				1	0	100	0
92		1				1	0	100	0
93						0
94	1					1	100	0	0
95	1					1	100	0	0
96	1					1	100	0	0
97	1					1	100	0	0
98	1					1	100	0	0
99	1					1	100	0	0
100			1			1	0	0	100
101	1					1	100	0	0
102						0
103						0
104						0
105	2					2	100	0	0
106		1				1	0	100	0
107		1				1	0	100	0
108	2	1				3	66.6667	33.3333	0
109	2	1				3	66.6667	33.3333	0
110	1	1				2	50	50	0
111	1	1				2	50	50	0
112		1				1	0	100	0
113		1				1	0	100	0
114						0
115						0
116		1				1	0	100	0
117		1				1	0	100	0
118	1					1	100	0	0
119						0
120	1		1			2	50	0	50
121	2					2	100	0	0
122	2					2	100	0	0
123	2					2	100	0	0
124	1					1	100	0	0
125						0
126	1					1	100	0	0
127						0
128						0
129	1					1	100	0	0
130	1					1	100	0	0
131						0
132						0
133	1					1	100	0	0
134	1					1	100	0	0
135						0
136						0
137	1					1	100	0	0
138		1	1			2	0	50	50
139		1	2			3	0	33.3333	66.6667
140						0
141	1					1	100	0	0
142	2					2	100	0	0
143						0
144						0
145	1					1	100	0	0
146	1					1	100	0	0
147	1					1	100	0	0
148						0
149	1	1				2	50	50	0
150	1	2				3	33.3333	66.6667	0
151	2	1				3	66.6667	33.3333	0
152	2	1				3	66.6667	33.3333	0
153	1					1	100	0	0
154	1					1	100	0	0
155						0
156						0
157	1					1	100	0	0
158	1	1	1			3	33.3333	33.3333	33.3333
159	1	1	1			3	33.3333	33.3333	33.3333
160	1	1	2			4	25	25	50
161	1	1	2			4	25	25	50
162	2					2	100	0	0
163	1					1	100	0	0
164						0
165	1					1	100	0	0
166			1			1	0	0	100
167	1					1	100	0	0
168	1		1			2	50	0	50
169	1					1	100	0	0
170		1				1	0	100	0
171		1				1	0	100	0
172	1					1	100	0	0
173	1					1	100	0	0
174		1	1			2	0	50	50
175		1	1			2	0	50	50
176			1			1	0	0	100
177	1					1	100	0	0
178	1					1	100	0	0
180	1					1	100	0	0
181	1					1	100	0	0
182	1					1	100	0	0
183						0
184	1	1				2	50	50	0
185	1					1	100	0	0
186						0
187		1	1			2	0	50	50
188	1	1				2	50	50	0
189						0
190	1					1	100	0	0
191	2					2	100	0	0
192	1					1	100	0	0
193		1				1	0	100	0
194	1					1	100	0	0
195						0
196	1					1	100	0	0
197			1			1	0	0	100
198	1					1	100	0	0
199						0
200						0
201						0
202	1					1	100	0	0
203						0
204						0
205						0
206						0
207	1					1	100	0	0
208						0
209	1					1	100	0	0
210	1					1	100	0	0
211						0
212	1	1				2	50	50	0
213	1	1				2	50	50	0
214						0
215						0
216	1					1	100	0	0
217	1					1	100	0	0
218						0
219						0
220	1					1	100	0	0
221			1			1	0	0	100
222						0
223						0
224	1					1	100	0	0
							68.3445	22.0358	9.61969
Cells within a 20 um neighborhood of a Nnat+ Cell							Percent of Neighbors that are:
Nnat+ Cell Number	Dcn Neighbor	H2-Ab1 Neighbor	Nnat Neighbor			Total Number of Neighbors	Dcn Neighbor	H2-Ab1 Neighbor	Nnat Neighbor
1						0
2						0
3						0
4						0
5						0
6	1					1	100	0	0
7						0
8						0
9						0
10						0
11						0
12		1				1	0	100	0
13						0
14		1				1	0	100	0
15						0
16		1				1	0	100	0
17	1					1	100	0	0
18						0
19	1					1	100	0	0
20						0
21						0
22		1				1	0	100	0
23						0
24						0
25						0
26						0
27						0
28						0
29			1			1	0	0	100
30		1	1			2	0	50	50
31						0
32						0
33						0
34			1			1	0	0	100
35			1			1	0	0	100
36	1					1	100	0	0
37						0
38			1			1	0	0	100
39			1			1	0	0	100
40						0
41						0
42						0
43						0
44		1				1	0	100	0
45						0
46	1					1	100	0	0
47			1			1	0	0	100
48			1			1	0	0	100
49						0
50			2			2	0	0	100
51			2			2	0	0	100
52			2			2	0	0	100
53		1				1	0	100	0
54			1			1	0	0	100
55			1			1	0	0	100
56						0
57	1		1			2	50	0	50
58			1			1	0	0	100
59						0
60						0
61						0
62						0
63			1			1	0	0	100
64			1			1	0	0	100
65	1					1	100	0	0
66	1		1			2	50	0	50
67			1			1	0	0	100
68						0
69						0
70		1				1	0	100	0
71						0
72						0
73	1					1	100	0	0
74						0
75			1			1	0	0	100
76			1			1	0	0	100
77			1			1	0	0	100
78	1		1			2	50	0	50
79	1	2				3	33.3333	66.6667	0
80			2			2	0	0	100
81			3			3	0	0	100
82			3			3	0	0	100
83			2			2	0	0	100
84			2			2	0	0	100
85			1			1	0	0	100
86	2		3			5	40	0	60
87		1				1	0	100	0
88			1			1	0	0	100
89			2			2	0	0	100
90			2			2	0	0	100
91			1			1	0	0	100
92		2				2	0	100	0
93			1			1	0	0	100
94						0
95						0
96			1			1	0	0	100
97			2			2	0	0	100
98			1			1	0	0	100
99						0
100						0
101						0
102			1			1	0	0	100
103			1			1	0	0	100
104						0
105		1				1	0	100	0
106						0
107	1					1	100	0	0
108						0
109						0
110						0
111	1					1	100	0	0
112						0
							18.7222	18.6111	62.6667

## Sheet: H2Ab1Nnat_Animal3
Cells within a 20 um neighborhood of an H2-Ab1+ Cell							Percent of Neighbors that are:						SUMMARY
H2-Ab1+ Cell Number	Dcn Neighbor	H2-Ab1 neighbor	Nnat neighbor			Total Number of Neighbors	Dcn Neighbor	H2-Ab1 neighbor	Nnat neighbor				H2-Ab1+ Cells				of cells with neighbors
1	1	1	1			3	33.3333	33.3333	33.3333				Animal #	# of H2-Ab1+ Cells	# of H2-Ab1+ cells with no neighbor	% of cells with no neighbor	Dcn Neighbor	H2-Ab1 neighbor	Nnat neighbor
2	2	1				3	66.6667	33.3333	0				Animal 3	212	72	33.9623	61.5714	29.619	8.80952
3	2	1				3	66.6667	33.3333	0
4		2	1			3	0	66.6667	33.3333
5		2	1			3	0	66.6667	33.3333
6		2	1			3	0	66.6667	33.3333
7	1					1	100	0	0				Nnat+ Cells				of cells with neighbors
8	1		1			2	50	0	50				Animal #	# of Nnat+ Cells	# Nnat+ cells with no neighbor	% of cells with no neighbor	Dcn Neighbor	H2-Ab1 neighbor	Nnat neighbor
9	1					1	100	0	0				Animal 3	124	73	58.871	18.3007	11.7647	69.9346
10	3					3	100	0	0
11	1	1	1			3	33.3333	33.3333	33.3333
12	1					1	100	0	0
13	1					1	100	0	0
14						0
15	1	1				2	50	50	0
16	2	1				3	66.6667	33.3333	0
17	1	1				2	50	50	0
18	2	2				4	50	50	0
19	2					2	100	0	0
20	1					1	100	0	0
21	1					1	100	0	0
22						0
23		1				1	0	100	0
24		1				1	0	100	0
25	1					1	100	0	0
26	1	1				2	50	50	0
27		1				1	0	100	0
28	1					1	100	0	0
29						0
30						0
31	2	1				3	66.6667	33.3333	0
32	2	1				3	66.6667	33.3333	0
33	2					2	100	0	0
34	2					2	100	0	0
35	2					2	100	0	0
36						0
37						0
38	1					1	100	0	0
39						0
40						0
41						0
42	1					1	100	0	0
43	1					1	100	0	0
44						0
45	1					1	100	0	0
46						0
47						0
48						0
49						0
50	1					1	100	0	0
51						0
52						0
53			1			1	0	0	100
54	1					1	100	0	0
55	1					1	100	0	0
56						0
57	1					1	100	0	0
58		1				1	0	100	0
59		1				1	0	100	0
60						0
61	3	2				5	60	40	0
62	3	2				5	60	40	0
63	2	2				4	50	50	0
64	2	2				4	50	50	0
65	1	1				2	50	50	0
66		1				1	0	100	0
67	2	1				3	66.6667	33.3333	0
68	1					1	100	0	0
69						0
70	2					2	100	0	0
71						0
72	1					1	100	0	0
73						0
74		1				1	0	100	0
75	1	1				2	50	50	0
76						0
77						0
78						0
79			1			1	0	0	100
80						0
81						0
82						0
83						0
84	1					1	100	0	0
85	1					1	100	0	0
86						0
87	1					1	100	0	0
88	1		1			2	50	0	50
89		1				1	0	100	0
90		1				1	0	100	0
91	1	1				2	50	50	0
92		1				1	0	100	0
93	1					1	100	0	0
94	2					2	100	0	0
95	1					1	100	0	0
96	1					1	100	0	0
97						0
98						0
99	1					1	100	0	0
100						0
101						0
102						0
103	1					1	100	0	0
104						0
105	1					1	100	0	0
106	1					1	100	0	0
107		1				1	0	100	0
108		1				1	0	100	0
109						0
110						0
111						0
112						0
113	1					1	100	0	0
114	1					1	100	0	0
115						0
116		1				1	0	100	0
117						0
1						0
2						0
3						0
4		1				1	0	100	0
5		1				1	0	100	0
6	1	2				3	33.3333	66.6667	0
7	1	2				3	33.3333	66.6667	0
8	1	2				3	33.3333	66.6667	0
9	1					1	100	0	0
10						0
11						0
12	1					1	100	0	0
13						0
14						0
15	1					1	100	0	0
16		1				1	0	100	0
17		1				1	0	100	0
18	1					1	100	0	0
19	1					1	100	0	0
20	1					1	100	0	0
21	1					1	100	0	0
22	1					1	100	0	0
23	1					1	100	0	0
24						0
25	1					1	100	0	0
26						0
27	1					1	100	0	0
28			1			1	0	0	100
29	1					1	100	0	0
30	1					1	100	0	0
31						0
32		1				1	0	100	0
33	1					1	100	0	0
34	1	1				2	50	50	0
35	1					1	100	0	0
36						0
37		1				1	0	100	0
38						0
39						0
40						0
41	1	2				3	33.3333	66.6667	0
42	1	2				3	33.3333	66.6667	0
43	1	2				3	33.3333	66.6667	0
44	2	2				4	50	50	0
45						0
46			1			1	0	0	100
47	1					1	100	0	0
48						0
49	2					2	100	0	0
50		1				1	0	100	0
51		2				2	0	100	0
52		1				1	0	100	0
53	2					2	100	0	0
54	1					1	100	0	0
55	1	1				2	50	50	0
56	1	1				2	50	50	0
57	1					1	100	0	0
58						0
59			1			1	0	0	100
60						0
61	1					1	100	0	0
62	1					1	100	0	0
63	1					1	100	0	0
64			2			2	0	0	100
65						0
66	1					1	100	0	0
67	1		2			3	33.3333	0	66.6667
68						0
69	1					1	100	0	0
70		1	1			2	0	50	50
71		1	1			2	0	50	50
72						0
73		1	1			2	0	50	50
74						0
75						0
76						0
77	1					1	100	0	0
78						0
79						0
80						0
81	1					1	100	0	0
82						0
83			2			2	0	0	100
84						0
85	1	2				3	33.3333	66.6667	0
86	1	2				3	33.3333	66.6667	0
87	1	2				3	33.3333	66.6667	0
88						0
89	1					1	100	0	0
90	1					1	100	0	0
91	1					1	100	0	0
92	1		1			2	50	0	50
93	1					1	100	0	0
94						0
95	2					2	100	0	0
							61.5714	29.619	8.80952
Cells within a 20 um neighborhood of a Nnat+ Cell							Percent of Neighbors that are:
Nnat+ Cell Number	Dcn Neighbor	H2-Ab1 Neighbor	Nnat Neighbor			Total Number of Neighbors	Dcn Neighbor	H2-Ab1 Neighbor	Nnat Neighbor
1			1			1	0	0	100
2			1			1	0	0	100
3						0
4						0
5						0
6	1	1				2	50	50	0
7			2			2	0	0	100
8	1		3			4	25	0	75
9	1		2			3	33.3333	0	66.6667
10						0
11			1			1	0	0	100
12			2			2	0	0	100
13			1			1	0	0	100
14		1				1	0	100	0
15	1		3			4	25	0	75
16						0
17						0
18						0
19						0
20						0
21						0
22						0
23						0
24						0
25						0
26						0
27						0
28						0
29						0
30						0
31	1					1	100	0	0
32						0
33						0
34						0
35						0
36						0
37		1				1	0	100	0
38						0
39						0
40						0
41						0
42						0
43						0
44			1			1	0	0	100
45						0
46			1			1	0	0	100
47			1			1	0	0	100
48						0
49			2			2	0	0	100
50			2			2	0	0	100
51			3			3	0	0	100
52	1		2			3	33.3333	0	66.6667
53			1			1	0	0	100
54			1			1	0	0	100
55						0
56	1					1	100	0	0
57						0
58						0
59						0
60						0
61						0
62			1			1	0	0	100
63			1			1	0	0	100
64			1			1	0	0	100
65			1			1	0	0	100
66						0
67						0
68	1					1	100	0	0
69						0
1						0
2						0
3						0
4						0
5						0
6						0
7						0
8						0
9						0
10	1	1				2	50	50	0
11						0
12			1			1	0	0	100
13			1			1	0	0	100
14			1			1	0	0	100
15			1			1	0	0	100
16		1				1	0	100	0
17			1			1	0	0	100
18			1			1	0	0	100
19						0
20						0
21						0
22						0
23						0
24			1			1	0	0	100
25			1			1	0	0	100
26						0
27			1			1	0	0	100
28		1	1			2	0	50	50
29						0
30						0
31						0
32						0
33						0
34	1	1				2	50	50	0
35	1					1	100	0	0
36		1				1	0	100	0
37						0
38						0
39						0
40						0
41			1			1	0	0	100
42			1			1	0	0	100
43						0
44						0
45	1					1	100	0	0
46	1		1			2	50	0	50
47	1		1			2	50	0	50
48			2			2	0	0	100
49	1		2			3	33.3333	0	66.6667
50	1		2			3	33.3333	0	66.6667
51						0
52						0
53						0
54						0
55						0
							18.3007	11.7647	69.9346
