# Supplementary material for: Deconstructing cold-induced brown adipocyte neogenesis in mice
Source: eLife journal article supplement (doi:10.7554/elife.80167), 2022-07-18
Supplement: supp [file elife-80167-supp-v1.zip]

Figure 2-figure supplement 1

**A**

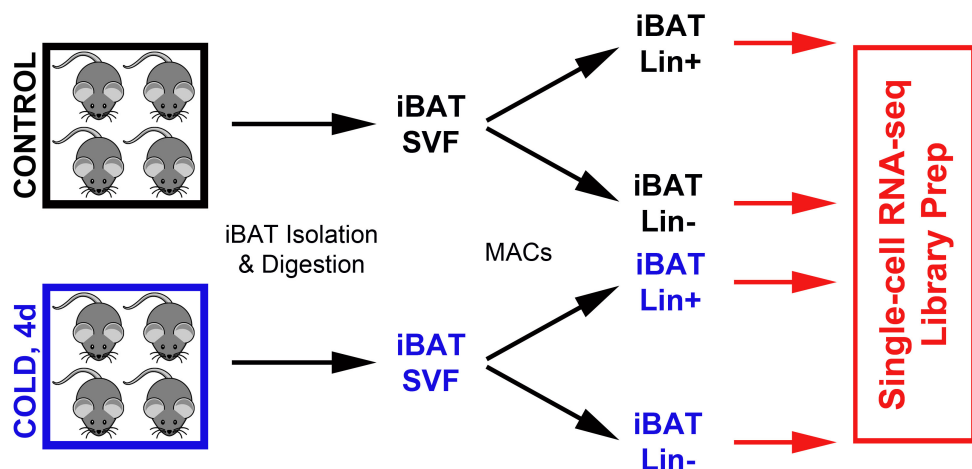

**B**

### Library Processing

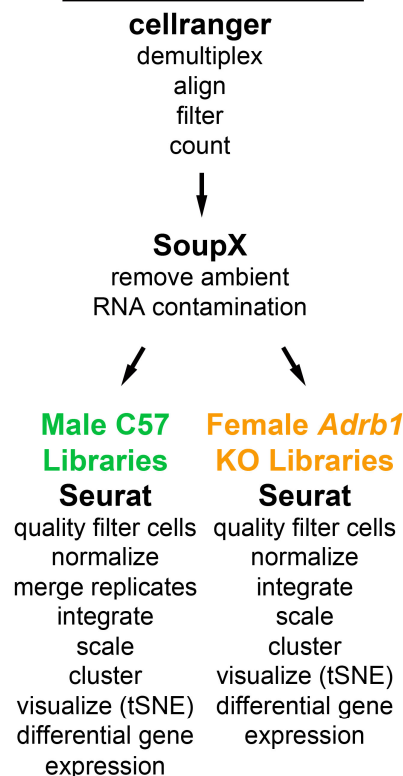

**C**

| Treatment | Sex of Mice | Replicate | Genotype                                                                   | 10X Genomics Single Cell Kit version | Cell Fractions |
|-----------|-------------|-----------|----------------------------------------------------------------------------|--------------------------------------|----------------|
| RT        | Male        | Rep1      | C57Bl/6j                                                                   | v2                                   | Lin+, Lin-     |
| COLD, 4d  | Male        | Rep1      | C57Bl/6j                                                                   | v2                                   | Lin+, Lin-     |
| CL, 4d    | Male        | Rep1      | C57Bl/6j                                                                   | v2                                   | Lin+, Lin-     |
| RT        | Male        | Rep2      | C57Bl/6j                                                                   | v2                                   | Lin+, Lin-     |
| COLD, 4d  | Male        | Rep2      | C57Bl/6j                                                                   | v2                                   | Lin+, Lin-     |
| CL, 4d    | Male        | Rep2      | C57Bl/6j                                                                   | v2                                   | Lin+, Lin-     |
| RT        | Female      | Rep1      | <i>Adrb1<sup>fl/fl</sup>;Pdgfra-CreER<sup>-/-</sup></i> (CON)              | v3                                   | Lin+, Lin-     |
| RT        | Female      | Rep1      | <i>Adrb1<sup>fl/fl</sup>;Pdgfra-CreER<sup>-/-</sup></i> ( <i>Adrb1</i> KO) | v3                                   | Lin+, Lin-     |
| COLD, 4d  | Female      | Rep1      | <i>Adrb1<sup>fl/fl</sup>;Pdgfra-CreER<sup>-/-</sup></i> (CON)              | v2                                   | Lin+, Lin-     |
| COLD, 4d  | Female      | Rep1      | <i>Adrb1<sup>fl/fl</sup>;Pdgfra-CreER<sup>-/-</sup></i> ( <i>Adrb1</i> KO) | v2                                   | Lin+, Lin-     |
