# Supplementary material for: Deconstructing cold-induced brown adipocyte neogenesis in mice
Source: eLife. 2022 Jul 18;11:e80167. doi: 10.7554/eLife.80167 (PMC9348851; doi:10.7554/eLife.80167)
Supplement: Supplementary file 1. [file elife-80167-supp1.xlsx]

## Sheet: INFORMATION
Supplementary File 1. DEGs for each cluster in the CONTROL and COLD Lin- iBAT data.
Related to Figure 2A-B.
List of DEGs define by Seurat by graph-based clustering. Each cluster is a new tab.
iBAT, Lin- cells, CONTROL and COLD libraries.
Differentially expressed genes that define each cluster were identified using a Wilcoxon Rank Sum test in Seurat with the following parameters: min.pct = 0.20, logfc.threshold = 0.2, only.pos = TRUE.

## Sheet: ASC Cluster1
	p_val	avg_logFC	pct.1	pct.2	p_val_adj
Smoc2	0	2.51294	0.673	0.205	0
Gsn	0	1.95534	0.884	0.435	0
Inmt	0	1.82534	0.458	0.098	0
Cxcl14	0	1.74842	0.547	0.242	0
Apod	0	1.43789	0.573	0.29	0
Hsd11b1	0	1.40328	0.522	0.146	0
Dcn	0	1.3598	0.891	0.504	0
Gdf10	0	1.34173	0.293	0.093	0
Crispld2	0	1.27912	0.492	0.131	0
Abca8a	0	1.22448	0.629	0.262	0
F3	0	1.20303	0.622	0.302	0
Penk	0	1.19721	0.275	0.038	0
Lum	0	1.15001	0.755	0.363	0
Clec11a	0	1.14104	0.31	0.081	0
Tgfbi	0	1.12234	0.415	0.16	0
Ccl11	0	1.1204	0.772	0.445	0
Gas6	0	1.10391	0.461	0.214	0
Il11ra1	0	1.07816	0.735	0.411	0
Cfh	0	1.07658	0.229	0.044	0
Podn	0	1.02416	0.445	0.11	0
Angptl1	0	1.00626	0.484	0.204	0
Fbln1	0	0.985452	0.386	0.166	0
Col15a1	0	0.977836	0.683	0.367	0
Entpd2	0	0.969407	0.695	0.361	0
Gpx3	0	0.968066	0.723	0.437	0
Col5a3	0	0.960589	0.572	0.361	0
Col3a1	0	0.939873	0.837	0.485	0
Abi3bp	0	0.933054	0.582	0.272	0
Cygb	0	0.892686	0.73	0.397	0
Svep1	0	0.877503	0.492	0.223	0
Mmp2	0	0.873036	0.731	0.439	0
Dpep1	0	0.868947	0.823	0.481	0
Serpinf1	0	0.851242	0.801	0.517	0
Rbp1	0	0.846112	0.438	0.206	0
Cp	0	0.841022	0.638	0.348	0
Cd302	0	0.840565	0.746	0.48	0
Nmb	0	0.838614	0.317	0.108	0
Nfib	0	0.83308	0.769	0.547	0
Gstt1	0	0.803743	0.562	0.331	0
Prelp	0	0.799113	0.573	0.266	0
Selenop	0	0.797138	0.794	0.606	0
Cst3	0	0.778704	0.728	0.55	0
Lama2	0	0.763428	0.522	0.269	0
Htra3	0	0.762022	0.726	0.455	0
Srpx	0	0.747191	0.694	0.377	0
Nupr1	0	0.737974	0.632	0.411	0
Col6a3	0	0.732677	0.699	0.447	0
Col1a2	0	0.719438	0.826	0.511	0
Col6a2	0	0.711111	0.702	0.45	0
Ecm2	0	0.704589	0.495	0.252	0
Ctsk	0	0.69302	0.526	0.297	0
Ms4a4d	0	0.689519	0.567	0.313	0
Spry1	0	0.687222	0.344	0.138	0
Lhfp	0	0.686337	0.529	0.298	0
Rnase4	0	0.685368	0.768	0.487	0
Lrp1	0	0.681512	0.681	0.44	0
Ogn	0	0.667833	0.671	0.403	0
Gpc3	0	0.661011	0.382	0.157	0
Pdgfra	0	0.652732	0.622	0.357	0
Fbln2	0	0.64807	0.59	0.374	0
Gstm2	0	0.646936	0.547	0.327	0
Bgn	0	0.635795	0.713	0.413	0
Pcolce	0	0.630753	0.799	0.507	0
Spon1	0	0.626686	0.247	0.065	0
Col6a1	0	0.625121	0.763	0.483	0
Cd81	0	0.623443	0.822	0.692	0
Serping1	0	0.620145	0.767	0.521	0
Fkbp7	0	0.619998	0.663	0.441	0
C1s1	0	0.598982	0.643	0.444	0
Cd63	0	0.598249	0.824	0.539	0
Col4a4	0	0.583235	0.21	0.05	0
G0s2	0	0.571722	0.543	0.286	0
Clec3b	0	0.567122	0.797	0.433	0
Abca8b	0	0.560649	0.236	0.063	0
Col5a2	0	0.55316	0.695	0.459	0
Igfbp7	0	0.536789	0.877	0.611	0
Steap4	0	0.527253	0.612	0.337	0
Serpinh1	0	0.486821	0.854	0.582	0
Vwa1	0	0.42874	0.306	0.113	0
Colec12	3.31252e-307	0.650863	0.362	0.171	6.07549e-303
Col4a1	3.64507e-307	0.691553	0.701	0.52	6.68542e-303
Itm2b	1.07608e-305	0.453912	0.846	0.746	1.97364e-301
Bicc1	3.51402e-303	0.623024	0.503	0.287	6.44507e-299
Anxa5	2.8159e-302	0.597367	0.718	0.56	5.16465e-298
Ces1d	1.29471e-294	0.604849	0.232	0.076	2.37463e-290
Cpq	1.53659e-294	0.611577	0.562	0.357	2.81826e-290
Rcn3	1.85826e-288	0.478284	0.713	0.47	3.40823e-284
Mgst1	1.53341e-287	0.563589	0.773	0.585	2.81243e-283
Adm	7.23643e-287	0.573282	0.238	0.078	1.32723e-282
Mmp3	2.17038e-284	1.20556	0.288	0.115	3.9807e-280
Antxr2	3.07094e-276	0.521636	0.42	0.217	5.63241e-272
Sdc2	1.77866e-275	0.576334	0.601	0.403	3.26224e-271
Itm2a	6.33138e-273	0.633338	0.468	0.267	1.16124e-268
Col1a1	1.19502e-263	0.59832	0.69	0.452	2.19179e-259
C1qtnf2	5.91119e-260	0.503993	0.24	0.085	1.08417e-255
Plxdc2	7.55811e-259	0.712666	0.549	0.38	1.38623e-254
Slco2b1	1.0412e-251	0.497106	0.236	0.085	1.90966e-247
Vtn	3.34503e-240	0.348019	0.276	0.108	6.13512e-236
Ggt5	1.40072e-239	0.539023	0.28	0.122	2.56905e-235
C1ra	6.9892e-239	0.516937	0.499	0.313	1.28189e-234
Cyb5a	6.59273e-238	0.472185	0.786	0.657	1.20917e-233
Mfap2	7.96585e-235	0.535508	0.492	0.294	1.46102e-230
Gpm6b	1.1276e-233	0.486283	0.468	0.282	2.06813e-229
Fam198b	1.26901e-232	0.543805	0.394	0.218	2.32749e-228
Il17d	1.28936e-230	0.499806	0.223	0.085	2.36482e-226
Ar	2.2747e-229	0.476964	0.43	0.238	4.17202e-225
Mxra8	2.38982e-225	0.531362	0.567	0.385	4.38317e-221
Col4a2	3.10353e-221	0.548291	0.673	0.512	5.69219e-217
Scn7a	1.47654e-220	0.357204	0.355	0.184	2.70811e-216
Frmd6	3.05076e-219	0.600289	0.369	0.203	5.59541e-215
Gas1	9.52689e-216	0.4453	0.512	0.321	1.74733e-211
Rhoj	1.06556e-215	0.554745	0.641	0.487	1.95434e-211
Kdelr3	8.99233e-214	0.539477	0.482	0.303	1.64928e-209
Creb3l1	1.1247e-213	0.518202	0.37	0.202	2.06281e-209
Osr1	8.96658e-212	0.685506	0.26	0.112	1.64456e-207
Adh1	5.34185e-211	0.600555	0.302	0.148	9.79749e-207
Hspg2	2.73868e-209	0.748559	0.583	0.471	5.023e-205
Scara5	1.1868e-208	0.319518	0.505	0.287	2.17671e-204
Ndn	2.39045e-206	0.505008	0.526	0.35	4.38432e-202
Aebp1	7.62522e-202	0.412153	0.689	0.475	1.39854e-197
Nid2	7.33589e-201	0.534364	0.354	0.199	1.34548e-196
Ank2	7.8551e-201	0.554195	0.264	0.123	1.4407e-196
Cd9	3.22852e-199	0.259944	0.506	0.325	5.92143e-195
C2	1.1597e-198	0.753692	0.282	0.141	2.12701e-194
Fbln7	1.63197e-195	0.707107	0.368	0.215	2.99319e-191
Mgp	2.18893e-194	0.718645	0.368	0.197	4.01472e-190
Sparc	5.49773e-194	0.440362	0.811	0.66	1.00834e-189
Ntf3	7.70737e-194	0.424161	0.269	0.122	1.41361e-189
Sfrp1	2.81958e-192	0.617384	0.291	0.143	5.1714e-188
Amy1	3.458e-191	0.491559	0.203	0.08	6.34231e-187
Laptm4a	2.28586e-188	0.382137	0.819	0.737	4.1925e-184
Gstm1	4.76812e-188	0.428999	0.671	0.531	8.74521e-184
Pdgfrl	1.60631e-186	0.638281	0.205	0.084	2.94613e-182
Ecm1	5.14293e-185	0.490727	0.502	0.318	9.43264e-181
Nav1	2.71452e-184	0.502045	0.532	0.374	4.97871e-180
Igf1	1.21446e-183	0.555835	0.507	0.336	2.22745e-179
Snhg18	4.47711e-182	0.467019	0.502	0.328	8.21147e-178
Itih5	1.58649e-175	0.56979	0.589	0.453	2.90979e-171
Fap	3.2235e-175	0.475999	0.308	0.166	5.91222e-171
Tmed3	3.80612e-175	0.399971	0.693	0.516	6.9808e-171
Meox1	9.90368e-175	0.571688	0.3	0.158	1.81643e-170
Htra1	1.04957e-173	0.479612	0.652	0.511	1.92501e-169
Ccdc80	6.49596e-173	0.44212	0.662	0.498	1.19142e-168
Sc5d	1.23329e-172	0.443667	0.252	0.12	2.26198e-168
Selenom	4.32955e-172	0.455133	0.657	0.534	7.94083e-168
Slc29a1	2.84969e-169	0.474517	0.503	0.348	5.22661e-165
Col5a1	2.53626e-168	0.444793	0.598	0.431	4.65176e-164
Gpnmb	1.13022e-166	0.56994	0.218	0.099	2.07293e-162
Cebpd	4.82946e-165	0.480062	0.603	0.444	8.85771e-161
Emp1	2.03373e-162	0.496504	0.491	0.329	3.73006e-158
Ctsb	2.09256e-160	0.388205	0.746	0.623	3.83796e-156
Arhgap24	3.02755e-160	0.514158	0.293	0.162	5.55284e-156
Mafb	2.86793e-158	0.582686	0.383	0.243	5.26007e-154
Rarres2	3.01372e-155	0.398431	0.71	0.564	5.52747e-151
Sult5a1	1.06681e-154	0.429884	0.357	0.209	1.95663e-150
Fads1	6.19475e-151	0.421528	0.254	0.13	1.13618e-146
Olfml3	1.22911e-149	0.636375	0.331	0.201	2.2543e-145
Aldh1a1	7.87225e-148	0.408583	0.28	0.149	1.44385e-143
Ltbp4	1.00284e-145	0.242789	0.357	0.197	1.8393e-141
Ctsh	5.41633e-145	0.32383	0.625	0.435	9.93409e-141
Rgmb	1.72009e-144	0.444622	0.278	0.15	3.15481e-140
Egfr	2.67709e-143	0.41412	0.414	0.27	4.91005e-139
Scarf2	9.47307e-143	0.431442	0.212	0.101	1.73746e-138
Klf9	7.41e-142	0.402093	0.691	0.562	1.35907e-137
S100a6	7.83821e-141	0.472424	0.705	0.603	1.43761e-136
Scd2	1.05999e-139	0.395815	0.366	0.232	1.94412e-135
Medag	7.00153e-139	0.383832	0.415	0.267	1.28415e-134
Copz2	1.94668e-138	0.460678	0.548	0.409	3.57041e-134
Sparcl1	7.68775e-136	0.380977	0.651	0.531	1.41001e-131
Wnt5a	1.79028e-135	0.370326	0.244	0.123	3.28356e-131
Selenos	4.62636e-135	0.436469	0.545	0.418	8.48521e-131
Fst	7.22282e-135	0.511377	0.525	0.382	1.32474e-130
Clmp	5.62351e-133	0.491079	0.383	0.258	1.03141e-128
Nbl1	1.31665e-132	0.531297	0.426	0.276	2.41486e-128
Ntrk2	9.01099e-131	0.454928	0.361	0.231	1.65271e-126
Cd34	2.13711e-130	0.200302	0.606	0.424	3.91967e-126
Enpp2	1.05916e-129	0.373643	0.51	0.359	1.94261e-125
Pdlim2	8.27983e-129	0.425446	0.404	0.266	1.5186e-124
Celf2	3.60285e-128	0.386099	0.595	0.458	6.608e-124
Lifr	9.70613e-128	0.471319	0.338	0.218	1.7802e-123
Zbtb20	1.11811e-127	0.338414	0.775	0.687	2.05073e-123
Cpxm1	8.4438e-127	0.381074	0.477	0.331	1.54868e-122
Atf5	4.58812e-126	0.442995	0.487	0.36	8.41507e-122
Pid1	6.59409e-123	0.482368	0.233	0.121	1.20942e-118
Fdps	1.6453e-122	0.451554	0.213	0.109	3.01764e-118
Lpl	1.20477e-121	0.271834	0.656	0.495	2.20967e-117
Ctsz	2.25808e-121	0.391491	0.651	0.533	4.14155e-117
Serpine2	3.66111e-119	0.348795	0.478	0.337	6.71484e-115
Vkorc1	9.52575e-119	0.384105	0.608	0.469	1.74712e-114
Fcgrt	3.45398e-118	0.356879	0.661	0.557	6.33495e-114
Tceal9	5.85672e-118	0.36695	0.638	0.501	1.07418e-113
Rcn1	2.41799e-117	0.403524	0.534	0.417	4.43484e-113
Fth1	6.65569e-117	0.378728	0.76	0.705	1.22072e-112
Rora	2.51738e-116	0.316483	0.374	0.248	4.61713e-112
B3gnt9	3.4321e-115	0.396964	0.236	0.13	6.29481e-111
Rrbp1	9.26166e-114	0.352493	0.713	0.61	1.69868e-109
Malat1	7.31614e-113	0.216704	0.836	0.764	1.34185e-108
Ctsl	6.66692e-111	0.328128	0.707	0.591	1.22278e-106
Ifitm2	1.12319e-109	0.325617	0.742	0.665	2.06005e-105
Tmsb10	1.51998e-109	0.347874	0.717	0.609	2.7878e-105
Fkbp9	2.38585e-109	0.37988	0.602	0.483	4.3759e-105
Hexb	4.12381e-109	0.477072	0.408	0.295	7.56348e-105
Lrrc17	8.6324e-109	0.348256	0.265	0.151	1.58327e-104
Lamc1	4.59871e-108	0.37081	0.562	0.443	8.4345e-104
Sod3	1.2632e-106	0.431873	0.42	0.304	2.31684e-102
Mmp14	1.49244e-106	0.331367	0.573	0.429	2.73728e-102
Nid1	6.38338e-104	0.285976	0.677	0.561	1.17078e-99
Gja1	1.27467e-103	0.322179	0.291	0.177	2.33788e-99
Meg3	2.62418e-103	0.255106	0.562	0.412	4.81301e-99
Apoe	4.81032e-103	0.858371	0.472	0.373	8.8226e-99
Hexa	6.47815e-103	0.334161	0.58	0.447	1.18816e-98
Ifngr1	1.2174e-102	0.344887	0.603	0.508	2.23284e-98
Thsd7a	2.12399e-102	0.38737	0.214	0.117	3.89562e-98
Gpr153	8.73622e-102	0.379464	0.238	0.135	1.60231e-97
Tuba1a	2.9965e-101	0.337101	0.671	0.582	5.49588e-97
Ppic	1.19268e-100	0.373282	0.625	0.51	2.18749e-96
Ptges	6.15612e-100	0.407835	0.24	0.143	1.12909e-95
Adamts5	9.55313e-100	0.204956	0.577	0.434	1.75214e-95
Lox	1.23315e-99	0.48192	0.215	0.121	2.26172e-95
Psap	4.1584e-97	0.260172	0.735	0.681	7.62692e-93
Ctsf	1.63705e-94	0.359707	0.252	0.152	3.00252e-90
Dpt	9.5527e-94	0.219782	0.659	0.52	1.75206e-89
Capg	2.70488e-93	0.292583	0.512	0.38	4.96101e-89
Itm2c	1.40971e-91	0.320515	0.608	0.511	2.58554e-87
Tmem159	1.46351e-90	0.345528	0.375	0.264	2.68423e-86
Mxra7	8.43576e-90	0.375878	0.415	0.31	1.5472e-85
Steap3	2.33555e-88	0.350777	0.328	0.225	4.28364e-84
Bmper	4.78189e-87	0.416964	0.374	0.273	8.77046e-83
Mdk	5.26524e-86	0.466104	0.268	0.176	9.65697e-82
Tnfsf12	1.21616e-85	0.293385	0.328	0.22	2.23057e-81
Krtcap2	2.18602e-85	0.31956	0.687	0.602	4.00938e-81
Adamts2	4.56424e-85	0.359098	0.456	0.343	8.37127e-81
Ifi207	8.78739e-84	0.381329	0.415	0.316	1.6117e-79
Lgals1	2.17534e-83	0.218626	0.728	0.62	3.98979e-79
Fxyd1	7.43272e-83	0.201864	0.626	0.527	1.36324e-78
Nenf	9.6207e-82	0.318	0.671	0.593	1.76453e-77
Lysmd2	2.97575e-80	0.356189	0.385	0.284	5.45781e-76
Emp2	5.68453e-80	0.236526	0.263	0.163	1.0426e-75
Tmem45a	7.42398e-80	0.388966	0.221	0.134	1.36163e-75
Tmeff2	8.95828e-80	0.375885	0.379	0.276	1.64304e-75
Adamtsl1	7.89059e-79	0.380811	0.284	0.188	1.44721e-74
Serpine1	2.59679e-78	0.520472	0.293	0.202	4.76278e-74
Ces2g	8.64125e-78	0.409515	0.206	0.124	1.58489e-73
Lpar1	1.77755e-77	0.323972	0.346	0.244	3.2602e-73
Mcrip1	5.31562e-77	0.331765	0.505	0.412	9.74937e-73
Kdelr2	1.12628e-76	0.350726	0.446	0.337	2.06571e-72
Nfix	8.68607e-76	0.346677	0.504	0.414	1.59311e-71
Emp3	2.50447e-75	0.270901	0.581	0.487	4.59344e-71
Adam33	3.92e-75	0.225509	0.239	0.143	7.18968e-71
Srpx2	1.40092e-74	0.34884	0.237	0.151	2.56942e-70
Mrc2	2.08705e-74	0.351935	0.336	0.241	3.82786e-70
Ypel3	3.68564e-74	0.283887	0.592	0.495	6.75984e-70
Prss23	5.05994e-73	0.231886	0.504	0.388	9.28044e-69
Tppp3	7.39646e-73	0.281785	0.473	0.35	1.35658e-68
P3h3	2.77786e-72	0.344154	0.392	0.298	5.09486e-68
Gstm5	1.68974e-71	0.367953	0.411	0.32	3.09916e-67
Ptgfrn	4.32971e-71	0.410617	0.285	0.199	7.94112e-67
Arf4	1.06654e-70	0.279573	0.693	0.624	1.95614e-66
Zfyve21	5.39672e-70	0.384748	0.337	0.254	9.89812e-66
Cyp1b1	8.0435e-70	0.341461	0.377	0.281	1.47526e-65
Rbms3	3.60883e-69	0.363322	0.268	0.18	6.61895e-65
Itpripl2	1.54824e-68	0.357531	0.255	0.171	2.83963e-64
Oat	2.04527e-68	0.352955	0.55	0.477	3.75124e-64
Slc1a5	2.31724e-68	0.350023	0.475	0.394	4.25005e-64
Ddah2	3.38507e-68	0.203689	0.512	0.396	6.20856e-64
Ergic3	6.25776e-68	0.319659	0.591	0.501	1.14774e-63
Pros1	2.19148e-67	0.300695	0.347	0.255	4.0194e-63
Fkbp14	9.65494e-67	0.281293	0.202	0.124	1.77081e-62
Fuca1	2.71794e-66	0.320519	0.501	0.411	4.98498e-62
Cped1	8.41382e-66	0.331224	0.221	0.14	1.54318e-61
Lamb1	5.89883e-64	0.427523	0.475	0.41	1.0819e-59
Rab34	1.45648e-63	0.378861	0.366	0.289	2.67134e-59
Igfbp4	1.49708e-63	0.24819	0.689	0.558	2.7458e-59
Scd1	1.64258e-63	0.239608	0.354	0.269	3.01265e-59
Sgce	3.22281e-63	0.246297	0.437	0.337	5.91096e-59
Marcks	3.29799e-63	0.335875	0.629	0.583	6.04885e-59
Cacna2d1	5.52123e-63	0.312171	0.204	0.129	1.01265e-58
Rabac1	1.13072e-62	0.273844	0.689	0.656	2.07386e-58
Selenok	2.17442e-62	0.326886	0.694	0.665	3.9881e-58
Ghr	3.52417e-62	0.326436	0.212	0.136	6.46369e-58
Msx1	6.17135e-62	0.307349	0.238	0.155	1.13189e-57
Maged2	7.94729e-61	0.335435	0.385	0.295	1.45761e-56
Nrep	8.2316e-61	0.346391	0.237	0.155	1.50976e-56
Adamts12	1.36916e-60	0.362004	0.246	0.169	2.51117e-56
Oaf	3.15528e-60	0.316476	0.528	0.444	5.78711e-56
Pea15a	8.58473e-60	0.213183	0.351	0.258	1.57452e-55
Tecr	1.43506e-59	0.316502	0.518	0.444	2.63204e-55
Txndc5	7.40544e-59	0.288204	0.536	0.45	1.35823e-54
Eif4g3	6.53845e-58	0.382881	0.341	0.264	1.19922e-53
Tm7sf3	2.61872e-57	0.290494	0.243	0.165	4.80299e-53
Zfhx4	3.49603e-57	0.32102	0.298	0.22	6.41207e-53
Fndc3b	1.87874e-55	0.32592	0.373	0.294	3.44579e-51
Zcchc24	2.37911e-55	0.289242	0.251	0.174	4.36352e-51
Cnpy2	2.65986e-55	0.268055	0.619	0.527	4.87845e-51
Man1a	8.25548e-55	0.205268	0.362	0.262	1.51414e-50
Fgfr1	1.49942e-54	0.2492	0.447	0.363	2.7501e-50
Jun	4.45763e-54	0.31591	0.65	0.618	8.17574e-50
Scpep1	5.81474e-54	0.339728	0.341	0.267	1.06648e-49
Gm2a	2.16504e-53	0.221083	0.256	0.179	3.97089e-49
Adk	4.19425e-52	0.308739	0.241	0.172	7.69268e-48
Arl1	1.38742e-51	0.2768	0.579	0.508	2.54467e-47
Ikbip	2.52986e-51	0.340506	0.332	0.262	4.64002e-47
P4ha1	2.84614e-51	0.331648	0.384	0.314	5.2201e-47
Trp53i13	3.6283e-51	0.328241	0.26	0.189	6.65467e-47
Tmem59	5.33249e-51	0.244433	0.696	0.645	9.78032e-47
Slit3	8.81228e-51	0.346518	0.302	0.229	1.61626e-46
Camk2n1	2.75212e-50	0.244102	0.214	0.14	5.04766e-46
Ddr2	5.22985e-49	0.216181	0.44	0.347	9.59207e-45
Herpud1	8.60158e-49	0.279285	0.354	0.277	1.57762e-44
Fam114a1	9.26012e-49	0.302553	0.298	0.226	1.6984e-44
Sra1	2.28825e-48	0.307737	0.482	0.417	4.19687e-44
Sash1	1.51754e-47	0.275691	0.358	0.284	2.78331e-43
Lamp2	6.20582e-47	0.242093	0.596	0.518	1.13821e-42
Eln	8.23569e-47	0.348213	0.256	0.183	1.51051e-42
Tram1	1.82242e-46	0.266081	0.475	0.409	3.34251e-42
Il6st	5.09785e-46	0.257642	0.391	0.321	9.34997e-42
Tmed9	7.33532e-46	0.24963	0.642	0.578	1.34537e-41
Pik3r1	1.12529e-45	0.284298	0.362	0.292	2.0639e-41
Eps8	2.13845e-45	0.260312	0.223	0.155	3.92212e-41
Nucb2	2.316e-45	0.34308	0.325	0.257	4.24778e-41
Slc39a7	8.66347e-45	0.275823	0.384	0.318	1.58897e-40
Gm26802	1.07662e-44	0.300153	0.284	0.214	1.97464e-40
Auts2	1.42471e-44	0.307509	0.217	0.152	2.61306e-40
Amotl1	1.69699e-44	0.30246	0.354	0.286	3.11244e-40
Slc50a1	3.68821e-44	0.234566	0.483	0.406	6.76455e-40
Ltbp1	6.05087e-44	0.238435	0.277	0.203	1.10979e-39
Rgs10	1.88935e-43	0.249817	0.295	0.226	3.46526e-39
Nfia	2.08887e-43	0.305156	0.387	0.313	3.83119e-39
Tmem119	2.27546e-43	0.284634	0.239	0.172	4.17342e-39
Aldh2	2.92437e-43	0.269181	0.54	0.501	5.36358e-39
Hic1	4.15672e-43	0.222619	0.222	0.154	7.62384e-39
Ggh	4.32402e-43	0.260447	0.402	0.327	7.93069e-39
Olfml2b	1.17781e-42	0.310319	0.301	0.231	2.16022e-38
Adam19	1.21515e-42	0.336844	0.217	0.158	2.22872e-38
P4ha2	2.01548e-42	0.270976	0.256	0.189	3.69658e-38
Chst12	2.34779e-42	0.270502	0.286	0.22	4.30608e-38
Sh3d19	3.85499e-42	0.293562	0.259	0.193	7.07045e-38
H1f0	1.08168e-41	0.282497	0.462	0.392	1.9839e-37
Tsc22d3	2.29017e-41	0.274289	0.371	0.301	4.20041e-37
Cyba	7.18657e-41	0.208227	0.6	0.533	1.31809e-36
Sec24d	4.95384e-40	0.269086	0.243	0.18	9.08584e-36
Morf4l2	6.22077e-40	0.228852	0.577	0.504	1.14095e-35
Sdf4	1.3104e-39	0.256352	0.568	0.514	2.40341e-35
Fundc2	3.03095e-39	0.276025	0.51	0.458	5.55907e-35
Lrpap1	4.70954e-39	0.279878	0.435	0.377	8.63776e-35
Atp1a2	1.54051e-38	0.253203	0.25	0.188	2.82545e-34
Il1r1	1.80274e-37	0.295013	0.302	0.242	3.30641e-33
Lamb2	2.1176e-37	0.209412	0.301	0.225	3.88389e-33
Cyth3	2.37131e-37	0.2447	0.267	0.202	4.34923e-33
Cdc42ep5	4.20386e-37	0.294021	0.243	0.184	7.71029e-33
Hmgcs1	7.16912e-37	0.324524	0.219	0.163	1.31489e-32
Tceal8	3.90109e-36	0.26809	0.463	0.401	7.15499e-32
Pofut2	4.4879e-36	0.252809	0.363	0.305	8.23126e-32
Itgb5	4.70857e-36	0.206753	0.352	0.283	8.63599e-32
Gabarapl1	5.56392e-36	0.247157	0.32	0.26	1.02048e-31
Egr1	8.69076e-36	0.341389	0.59	0.576	1.59397e-31
Sfr1	1.24913e-35	0.225599	0.641	0.583	2.29104e-31
Asap1	2.75462e-35	0.218921	0.371	0.303	5.05224e-31
Calu	2.78332e-35	0.214103	0.538	0.474	5.10488e-31
Eva1b	4.25077e-35	0.200452	0.512	0.45	7.79635e-31
Fam102b	1.03388e-34	0.284844	0.229	0.172	1.89625e-30
Cyp20a1	1.5626e-34	0.219399	0.273	0.214	2.86596e-30
Gnptg	3.72237e-34	0.233642	0.211	0.155	6.82721e-30
Nr1d1	6.88421e-34	0.21309	0.209	0.15	1.26263e-29
Prrx1	7.16312e-34	0.26945	0.457	0.394	1.31379e-29
Sec11a	8.64382e-34	0.260893	0.545	0.489	1.58536e-29
Dap	1.5122e-33	0.202616	0.487	0.426	2.77353e-29
Sec22b	2.54508e-33	0.301841	0.389	0.345	4.66793e-29
Pdlim4	3.54842e-33	0.228595	0.282	0.22	6.50816e-29
Por	4.34207e-33	0.297171	0.351	0.302	7.96379e-29
Mme	8.51615e-33	0.308182	0.257	0.206	1.56195e-28
Pten	9.2751e-33	0.269089	0.363	0.313	1.70115e-28
Ddost	1.48799e-32	0.275639	0.574	0.512	2.72912e-28
Igsf10	1.4982e-32	0.29174	0.231	0.176	2.74786e-28
Dpm3	2.09542e-32	0.251082	0.441	0.384	3.84321e-28
Epb41l2	2.29627e-32	0.236901	0.368	0.308	4.21159e-28
Swi5	3.1324e-32	0.206865	0.692	0.625	5.74513e-28
Nnmt	3.31894e-32	0.239444	0.398	0.341	6.08726e-28
Bet1l	6.14209e-32	0.26037	0.22	0.167	1.12652e-27
Vcam1	7.82515e-32	0.248739	0.32	0.261	1.43521e-27
Scn1b	1.09747e-31	0.249371	0.3	0.245	2.01287e-27
Atraid	6.54038e-31	0.250405	0.552	0.511	1.19957e-26
Plod1	9.08919e-31	0.315518	0.347	0.303	1.66705e-26
Fam46a	1.28433e-29	0.264795	0.439	0.384	2.3556e-25
Dpysl3	1.74181e-29	0.255983	0.261	0.208	3.19465e-25
Ginm1	2.59824e-29	0.237458	0.398	0.353	4.76544e-25
B4galt1	4.13771e-29	0.291875	0.256	0.207	7.58897e-25
Tmed1	4.87862e-29	0.270489	0.326	0.279	8.94788e-25
Dnajc3	6.44617e-29	0.254474	0.487	0.452	1.18229e-24
Ift20	2.90229e-28	0.233209	0.495	0.444	5.32309e-24
Ube2e2	3.09855e-28	0.242548	0.203	0.154	5.68304e-24
Mageh1	1.30932e-27	0.201017	0.262	0.206	2.40142e-23
Cxxc5	1.71587e-27	0.234173	0.262	0.212	3.14708e-23
Yipf5	2.35354e-27	0.256114	0.327	0.278	4.31663e-23
Nfic	6.81551e-27	0.258145	0.42	0.383	1.25003e-22
Rin2	6.83075e-27	0.250003	0.218	0.171	1.25283e-22
Twsg1	7.03476e-27	0.233584	0.218	0.167	1.29025e-22
H2-M3	1.44374e-26	0.215099	0.244	0.194	2.64796e-22
Tmem167	1.61929e-26	0.222451	0.548	0.485	2.96993e-22
Ssbp2	1.82927e-26	0.223417	0.272	0.221	3.35506e-22
Golim4	3.78661e-26	0.232545	0.333	0.285	6.94502e-22
Rnd3	3.86595e-26	0.21449	0.205	0.157	7.09053e-22
Rab2a	4.42463e-26	0.212914	0.624	0.596	8.11521e-22
Xbp1	9.36822e-26	0.200789	0.429	0.378	1.71823e-21
Pnp	2.10769e-25	0.227019	0.453	0.397	3.86571e-21
Yipf3	6.61641e-25	0.214953	0.4	0.358	1.21352e-20
Gaa	8.91146e-25	0.248905	0.357	0.313	1.63445e-20
Jade1	2.38038e-24	0.266062	0.22	0.178	4.36585e-20
Pkd2	2.59817e-24	0.24349	0.237	0.19	4.7653e-20
Sec31a	4.2492e-23	0.249235	0.351	0.313	7.79347e-19
Ski	8.27117e-23	0.202707	0.258	0.21	1.51701e-18
Tgfbr3	1.86264e-22	0.221713	0.374	0.333	3.41627e-18
Erlec1	2.52205e-22	0.225278	0.369	0.327	4.62569e-18
Drap1	3.85306e-22	0.217982	0.481	0.442	7.0669e-18
Erg28	4.56738e-22	0.261701	0.259	0.219	8.37704e-18
Sfxn1	2.55171e-21	0.233516	0.444	0.409	4.68009e-17
2900097C17Rik	3.06028e-21	0.244689	0.348	0.313	5.61286e-17
Spcs1	7.59279e-21	0.217087	0.641	0.597	1.39259e-16
Prrc1	1.56486e-20	0.246405	0.205	0.165	2.87012e-16
Spred1	1.61686e-20	0.219643	0.232	0.191	2.96548e-16
Gpr180	2.49841e-20	0.207093	0.225	0.184	4.58233e-16
Cldn15	3.51674e-20	0.203225	0.249	0.206	6.45005e-16
Ebpl	4.1097e-20	0.218822	0.236	0.196	7.53761e-16
Vamp4	6.05837e-19	0.230873	0.217	0.178	1.11117e-14
Copa	8.73478e-19	0.215196	0.373	0.339	1.60205e-14
Crtap	1.19872e-18	0.239894	0.355	0.321	2.19858e-14
Chpf	4.06756e-18	0.316006	0.287	0.258	7.46031e-14
Adam23	4.79362e-18	0.216661	0.243	0.207	8.79197e-14
H13	5.72777e-18	0.240242	0.415	0.394	1.05053e-13
Tusc3	1.15268e-17	0.206126	0.3	0.266	2.11413e-13
Dapk1	3.19272e-17	0.275704	0.29	0.259	5.85576e-13
Arl3	1.24451e-16	0.23724	0.361	0.334	2.28256e-12
Serf1	1.37792e-16	0.292802	0.256	0.228	2.52724e-12
Fkbp10	3.04376e-16	0.211854	0.32	0.287	5.58257e-12
Cdk2ap2	6.58286e-16	0.214983	0.417	0.396	1.20736e-11
Yif1a	2.19438e-15	0.254609	0.347	0.329	4.02471e-11
Svil	2.54613e-15	0.218661	0.226	0.193	4.66986e-11
Cxcl16	7.87428e-15	0.213003	0.223	0.189	1.44422e-10
Smim1	1.20463e-14	0.206112	0.238	0.204	2.20942e-10
Tvp23b	3.44823e-14	0.218109	0.233	0.203	6.3244e-10
Ier3ip1	3.4709e-14	0.201802	0.396	0.374	6.36598e-10
Maged1	9.05563e-14	0.204222	0.45	0.421	1.66089e-09
Ntan1	1.26594e-13	0.20019	0.37	0.348	2.32187e-09
Bcl7c	1.40236e-13	0.220344	0.368	0.352	2.57207e-09
Nrip1	4.47394e-13	0.201702	0.278	0.25	8.20564e-09
C4b	6.25285e-13	0.51016	0.21	0.187	1.14683e-08
Lrp6	2.04534e-12	0.246807	0.256	0.232	3.75135e-08
Aga	2.44101e-11	0.240457	0.274	0.253	4.47706e-07
P3h4	3.94422e-11	0.233012	0.291	0.273	7.2341e-07
Gadd45g	1.26749e-10	0.4362	0.417	0.408	2.32471e-06
Sned1	4.15719e-10	0.279548	0.207	0.183	7.6247e-06
Asph	5.21104e-10	0.200984	0.244	0.222	9.55758e-06
Chic2	3.41355e-09	0.204091	0.401	0.392	6.2608e-05
Mrps28	4.63682e-09	0.211929	0.326	0.313	8.50438e-05
Eri3	2.48331e-07	0.203428	0.243	0.229	0.00455464
Snx9	5.09272e-07	0.219406	0.278	0.267	0.00934056
Dnajc25	1.54467e-05	0.220388	0.256	0.25	0.283308
Cxcl13	0.00036059	0.458558	0.176	0.202	1
Man2a1	0.00140627	0.207988	0.255	0.253	1

## Sheet: ASC Cluster2
	p_val	avg_logFC	pct.1	pct.2	p_val_adj
Pi16	0	3.72228	0.907	0.079	0
Sbsn	0	2.61395	0.647	0.068	0
Igfbp6	0	2.33821	0.959	0.236	0
Fn1	0	2.12755	0.932	0.239	0
Pcolce2	0	2.10354	0.896	0.168	0
Dmkn	0	2.07449	0.397	0.018	0
Plpp3	0	1.9997	0.946	0.523	0
Sema3c	0	1.92753	0.714	0.051	0
Anxa3	0	1.89176	0.832	0.189	0
Ugdh	0	1.84432	0.747	0.242	0
Mfap5	0	1.8374	0.909	0.315	0
Pcsk6	0	1.83023	0.762	0.114	0
Ackr3	0	1.80417	0.769	0.128	0
Cd55	0	1.80235	0.695	0.106	0
Cd248	0	1.77465	0.809	0.228	0
Fbn1	0	1.75423	0.85	0.376	0
Procr	0	1.75402	0.763	0.182	0
Timp2	0	1.71649	0.947	0.475	0
Krtdap	0	1.70589	0.329	0.009	0
Pla1a	0	1.6978	0.793	0.261	0
Col14a1	0	1.67827	0.772	0.135	0
Clec3b	0	1.67823	0.975	0.425	0
Fndc1	0	1.67717	0.774	0.168	0
Anxa1	0	1.66092	0.875	0.4	0
Efemp1	0	1.6487	0.773	0.264	0
Dpp4	0	1.6413	0.616	0.037	0
C3	0	1.63827	0.9	0.403	0
Emilin2	0	1.57461	0.692	0.137	0
Creb5	0	1.55299	0.647	0.09	0
Gfpt2	0	1.5264	0.65	0.128	0
Sfrp2	0	1.50242	0.612	0.08	0
Cxcl13	0	1.48397	0.428	0.149	0
Metrnl	0	1.44975	0.702	0.222	0
Dpt	0	1.44826	0.939	0.474	0
Adamts5	0	1.42663	0.858	0.389	0
Igfbp5	0	1.4127	0.69	0.342	0
Has1	0	1.41156	0.381	0.061	0
Il1r2	0	1.38796	0.38	0.049	0
Scara5	0	1.38648	0.785	0.248	0
Lrrn4cl	0	1.37339	0.615	0.113	0
Cadm3	0	1.35456	0.542	0.065	0
Cd34	0	1.33665	0.855	0.388	0
Ace	0	1.33138	0.722	0.206	0
Axl	0	1.331	0.799	0.381	0
Efhd1	0	1.31856	0.5	0.042	0
Qpct	0	1.27113	0.607	0.145	0
Opcml	0	1.24628	0.442	0.027	0
Ecm1	0	1.2441	0.714	0.289	0
Ptgs2	0	1.23338	0.295	0.032	0
Adgrd1	0	1.22924	0.481	0.056	0
Tmem100	0	1.22473	0.537	0.105	0
Car8	0	1.16371	0.378	0.021	0
Islr	0	1.1617	0.689	0.289	0
Serping1	0	1.12463	0.9	0.514	0
Jpt1	0	1.12296	0.809	0.445	0
Mt2	0	1.1177	0.632	0.339	0
Stmn4	0	1.10731	0.313	0.01	0
Aldh1a3	0	1.08783	0.287	0.012	0
Man1a	0	1.08622	0.637	0.215	0
Fstl1	0	1.08344	0.896	0.529	0
Tppp3	0	1.07879	0.723	0.31	0
Tnxb	0	1.07135	0.735	0.369	0
Serpinb6a	0	1.07126	0.849	0.505	0
Smpd3	0	1.06461	0.327	0.016	0
Ogn	0	1.06384	0.814	0.395	0
Tgfbr2	0	1.06045	0.656	0.278	0
Ifi27l2a	0	1.05964	0.816	0.377	0
1700019D03Rik	0	1.04719	0.355	0.028	0
Ahnak2	0	1.04304	0.57	0.195	0
S100a10	0	1.04256	0.875	0.579	0
Dact2	0	1.03354	0.261	0.012	0
Ly6a	0	1.00479	0.935	0.547	0
Scara3	0	0.99764	0.486	0.139	0
Uqcc2	0	0.988269	0.702	0.422	0
Adam33	0	0.984074	0.423	0.113	0
Il18	0	0.979494	0.364	0.059	0
Flrt2	0	0.975769	0.383	0.076	0
Dbn1	0	0.968929	0.46	0.148	0
Zfp385a	0	0.968502	0.394	0.086	0
Ddr2	0	0.965468	0.65	0.312	0
Nid1	0	0.958663	0.844	0.536	0
Gas7	0	0.947066	0.374	0.09	0
Ppp1r14b	0	0.939514	0.651	0.329	0
Lurap1l	0	0.933813	0.345	0.046	0
Ahnak	0	0.930185	0.838	0.576	0
Il33	0	0.925373	0.315	0.06	0
Uap1	0	0.916697	0.549	0.274	0
Igfbp4	0	0.915915	0.893	0.527	0
Lgi2	0	0.914228	0.431	0.117	0
Antxr1	0	0.909796	0.5	0.192	0
Pamr1	0	0.905807	0.325	0.039	0
Marcks	0	0.898609	0.8	0.552	0
Nbl1	0	0.895917	0.627	0.248	0
Errfi1	0	0.890954	0.569	0.278	0
S100a11	0	0.882984	0.853	0.621	0
Aebp1	0	0.87954	0.805	0.469	0
Plat	0	0.876256	0.533	0.204	0
Lbp	0	0.87376	0.449	0.192	0
Prss23	0	0.863211	0.653	0.367	0
Bmp1	0	0.860794	0.624	0.352	0
Gstm1	0	0.860743	0.789	0.518	0
Vegfd	0	0.85585	0.363	0.12	0
Vasn	0	0.855783	0.411	0.139	0
Klf4	0	0.832065	0.741	0.435	0
Uchl1	0	0.829136	0.247	0.027	0
Rnase4	0	0.827129	0.844	0.493	0
Ildr2	0	0.823782	0.256	0.026	0
Zyx	0	0.819889	0.499	0.194	0
Ptgis	0	0.811844	0.305	0.054	0
Prrx1	0	0.811278	0.643	0.362	0
Ddah2	0	0.804569	0.673	0.372	0
Mustn1	0	0.799106	0.561	0.099	0
Basp1	0	0.796724	0.451	0.209	0
Prkg2	0	0.788928	0.204	0.025	0
Nova1	0	0.784972	0.315	0.069	0
Limch1	0	0.78444	0.35	0.062	0
Galnt16	0	0.776687	0.3	0.048	0
Tmem158	0	0.759753	0.292	0.077	0
Medag	0	0.756186	0.524	0.256	0
Ly6c1	0	0.754607	0.863	0.357	0
Fyn	0	0.749123	0.435	0.169	0
Thbs3	0	0.745529	0.337	0.082	0
Tmeff2	0	0.732556	0.528	0.254	0
Fez1	0	0.730719	0.322	0.061	0
Arhgap20	0	0.729054	0.317	0.087	0
Aif1l	0	0.727761	0.227	0.032	0
Loxl1	0	0.721229	0.725	0.436	0
Ablim1	0	0.719438	0.579	0.244	0
Slc43a3	0	0.713788	0.687	0.479	0
Arl4d	0	0.71178	0.255	0.039	0
Ar	0	0.706569	0.493	0.241	0
Dact1	0	0.702774	0.292	0.075	0
Heg1	0	0.697207	0.553	0.28	0
Clip4	0	0.690179	0.214	0.018	0
Maf	0	0.677538	0.294	0.1	0
S100a13	0	0.677302	0.739	0.563	0
Sirpa	0	0.676356	0.278	0.087	0
Cdon	0	0.674147	0.259	0.06	0
Slco3a1	0	0.670041	0.355	0.133	0
Trio	0	0.665216	0.296	0.101	0
Gpc3	0	0.661912	0.417	0.168	0
Adamtsl4	0	0.660711	0.21	0.023	0
Adamts2	0	0.656874	0.57	0.329	0
Lsp1	0	0.65538	0.509	0.193	0
S100a6	0	0.653395	0.826	0.586	0
Calml4	0	0.652083	0.245	0.049	0
Rps4x	0	0.652044	0.884	0.676	0
Olfml2b	0	0.643327	0.439	0.209	0
Chst1	0	0.643224	0.227	0.042	0
Pde8a	0	0.637606	0.276	0.083	0
Mmp23	0	0.636951	0.562	0.314	0
Rpl13	0	0.628247	0.94	0.718	0
Ptgs1	0	0.623103	0.218	0.04	0
Rpl30	0	0.621446	0.817	0.665	0
Rps24	0	0.618386	0.91	0.715	0
Rpl35a	0	0.617759	0.873	0.719	0
Rps15	0	0.613703	0.835	0.666	0
Osr1	0	0.60444	0.336	0.108	0
Rpl21	0	0.60213	0.836	0.694	0
Rps3a1	0	0.586409	0.919	0.705	0
Rpl23	0	0.569514	0.898	0.711	0
Gda	0	0.564331	0.268	0.075	0
Ctsl	0	0.561408	0.806	0.58	0
Tek	0	0.555617	0.357	0.134	0
Rps20	0	0.555338	0.873	0.682	0
Eef1a1	0	0.550588	0.934	0.767	0
Rps5	0	0.541651	0.911	0.707	0
Fth1	0	0.514108	0.869	0.687	0
Rps23	0	0.478036	0.924	0.757	0
Sema3b	0	0.47161	0.208	0.048	0
Sfrp4	0	0.470289	0.248	0.053	0
Lamc1	1.53102e-303	0.624663	0.655	0.433	2.80803e-299
Blvrb	3.6224e-302	0.670255	0.574	0.361	6.64383e-298
Vldlr	8.42691e-302	0.661054	0.317	0.12	1.54558e-297
Ntn1	8.88466e-302	0.558008	0.25	0.075	1.62954e-297
Rps14	9.59922e-302	0.459902	0.908	0.752	1.76059e-297
Rpl23a	3.69582e-290	0.478267	0.899	0.737	6.7785e-286
Lpar1	3.0722e-289	0.659089	0.451	0.231	5.63472e-285
Dnm1	7.4615e-283	0.507829	0.202	0.054	1.36851e-278
Pdpn	1.01513e-280	0.623527	0.309	0.12	1.86186e-276
Abi3bp	3.895e-274	0.487875	0.546	0.303	7.14382e-270
Gpx3	2.15954e-273	0.561869	0.722	0.46	3.96081e-269
Fgfr1	2.82259e-272	0.680192	0.551	0.349	5.17692e-268
Fbln1	1.58117e-268	0.575321	0.398	0.18	2.90003e-264
Il1rl2	5.7243e-262	0.590589	0.243	0.081	1.04989e-257
Nenf	6.54759e-262	0.572667	0.758	0.582	1.20089e-257
Rps11	1.83663e-261	0.412209	0.876	0.713	3.36856e-257
Agpat4	2.52863e-257	0.629726	0.358	0.165	4.63775e-253
Myof	3.81024e-257	0.550624	0.223	0.07	6.98837e-253
Ltbp1	7.62026e-257	0.633704	0.386	0.187	1.39763e-252
Rpl37a	1.37694e-250	0.578725	0.824	0.669	2.52544e-246
Ccdc80	4.31402e-250	0.572102	0.72	0.499	7.91234e-246
Kdelc2	1.54314e-249	0.65285	0.348	0.162	2.83027e-245
Rpl17	6.93693e-247	0.44157	0.863	0.721	1.2723e-242
Rps10	1.77828e-245	0.490913	0.813	0.652	3.26154e-241
Atox1	1.2126e-242	0.616075	0.708	0.557	2.22404e-238
Rps26	8.87378e-241	0.541291	0.8	0.633	1.62754e-236
S100a16	1.16739e-240	0.538936	0.698	0.507	2.14111e-236
Rps27a	1.73155e-240	0.43809	0.883	0.707	3.17584e-236
Rspo3	7.06002e-240	0.626896	0.229	0.078	1.29488e-235
Tshz2	3.56108e-239	0.59266	0.592	0.402	6.53138e-235
Emp3	4.42506e-235	0.60665	0.665	0.477	8.11601e-231
Tnfaip6	4.99558e-235	1.0423	0.493	0.299	9.16239e-231
Ebf2	5.11702e-234	0.646042	0.551	0.37	9.38512e-230
Ebf1	5.2513e-234	0.542561	0.754	0.618	9.63141e-230
Thy1	1.8505e-233	0.716732	0.523	0.333	3.39399e-229
Txn1	1.91903e-233	0.57962	0.775	0.618	3.51968e-229
Rps8	1.70772e-231	0.467069	0.819	0.654	3.13214e-227
Epdr1	7.05628e-231	0.519398	0.232	0.081	1.29419e-226
Rps29	1.31877e-227	0.486886	0.83	0.702	2.41875e-223
Rpl31	1.4471e-226	0.481414	0.808	0.666	2.65412e-222
Tgfbr3	9.21244e-225	0.642361	0.497	0.312	1.68965e-220
Plce1	1.12235e-224	0.455988	0.224	0.075	2.0585e-220
Ang	1.30402e-224	0.586762	0.34	0.162	2.3917e-220
Rpl26	8.98724e-224	0.433419	0.839	0.69	1.64835e-219
Rps17	2.65784e-223	0.432706	0.865	0.719	4.87475e-219
Antxr2	5.97108e-222	0.56804	0.426	0.232	1.09516e-217
Ifi204	2.14322e-221	0.552717	0.594	0.389	3.93088e-217
Cpq	8.5652e-218	0.532901	0.568	0.371	1.57094e-213
Rps15a	1.90206e-215	0.39005	0.871	0.71	3.48857e-211
Cd47	1.95203e-215	0.490632	0.766	0.625	3.58021e-211
Vat1	1.68914e-214	0.565501	0.499	0.313	3.09805e-210
Tpt1	2.54488e-214	0.402761	0.882	0.752	4.66757e-210
Kif2a	5.72104e-212	0.617357	0.345	0.175	1.0493e-207
Rpl37	5.0665e-211	0.459971	0.829	0.691	9.29247e-207
Lrrc17	8.10486e-211	0.574719	0.319	0.149	1.48651e-206
Smim14	1.87105e-210	0.541228	0.671	0.516	3.43169e-206
Crip1	1.84556e-209	0.346798	0.727	0.534	3.38494e-205
Csf1	6.6548e-208	0.600153	0.432	0.252	1.22056e-203
Pygl	7.2937e-207	0.511112	0.205	0.07	1.33774e-202
Plac8	1.67505e-206	0.481938	0.38	0.182	3.0722e-202
Rpl5	4.16218e-205	0.488385	0.772	0.612	7.63385e-201
Cebpd	1.6963e-204	0.609396	0.639	0.449	3.11118e-200
Rpl4	2.46543e-204	0.391649	0.849	0.691	4.52185e-200
Rpl7	1.74374e-201	0.409698	0.836	0.68	3.1982e-197
Rpl34	7.42011e-201	0.397186	0.852	0.723	1.36092e-196
Sod3	5.0064e-199	0.528149	0.482	0.3	9.18224e-195
Nfix	2.19955e-198	0.556912	0.571	0.407	4.03419e-194
Camk2n1	3.75066e-198	0.48049	0.295	0.129	6.87909e-194
Rplp1	8.09697e-197	0.46395	0.79	0.638	1.48507e-192
Rps25	6.41162e-196	0.437245	0.823	0.685	1.17596e-191
Glud1	5.05998e-195	0.558775	0.504	0.333	9.28051e-191
Ckb	1.67458e-194	0.344998	0.517	0.311	3.07135e-190
C1ra	5.95115e-191	0.511344	0.509	0.326	1.0915e-186
Rps28	1.20567e-189	0.455741	0.805	0.663	2.21131e-185
Lama4	3.17318e-189	0.568369	0.5	0.334	5.81993e-185
Vgll3	1.17486e-187	0.531079	0.234	0.093	2.15481e-183
Triobp	1.39592e-184	0.497648	0.364	0.194	2.56026e-180
Galnt15	2.87776e-182	0.407628	0.22	0.081	5.2781e-178
Csrp2	2.23997e-181	0.558212	0.501	0.333	4.10833e-177
Fhl1	1.99373e-178	0.515425	0.416	0.248	3.6567e-174
Add3	4.40999e-178	0.536345	0.484	0.32	8.08837e-174
Rpl27a	8.1528e-176	0.345163	0.872	0.736	1.4953e-171
Rps7	4.40237e-175	0.379298	0.848	0.715	8.07438e-171
Rps3	1.41031e-171	0.298584	0.887	0.724	2.58665e-167
Cavin3	7.21496e-171	0.426488	0.767	0.617	1.3233e-166
Rpl14	3.41987e-170	0.355881	0.833	0.68	6.27239e-166
Sulf2	7.83836e-168	0.531907	0.25	0.113	1.43763e-163
Wnt5a	5.57414e-166	0.536219	0.27	0.127	1.02235e-161
Htra1	9.40866e-166	0.467501	0.682	0.516	1.72564e-161
Vim	6.34759e-164	0.296464	0.846	0.673	1.16421e-159
Rps18	1.7671e-163	0.349582	0.834	0.69	3.24104e-159
Fbln5	3.77526e-163	0.221286	0.498	0.306	6.9242e-159
Tubb6	8.58442e-163	0.518295	0.458	0.292	1.57447e-158
Rpl32	3.87567e-162	0.279035	0.89	0.722	7.10837e-158
Ndn	1.95783e-161	0.498027	0.524	0.365	3.59086e-157
Eef1b2	2.13013e-161	0.414081	0.764	0.609	3.90687e-157
Rab7b	1.72062e-160	0.462827	0.233	0.101	3.15579e-156
Klf3	3.63323e-160	0.468708	0.454	0.289	6.66371e-156
Sat1	3.73334e-160	0.541038	0.593	0.438	6.84731e-156
Nupr1	6.07443e-160	0.399928	0.62	0.43	1.11411e-155
Lrp1	3.81829e-159	0.401154	0.643	0.467	7.00313e-155
Htra3	2.44256e-158	0.320625	0.704	0.48	4.4799e-154
Bag1	2.86076e-155	0.503663	0.591	0.46	5.24692e-151
Gngt2	1.45785e-154	0.418524	0.344	0.184	2.67384e-150
St3gal2	1.13207e-153	0.49405	0.277	0.137	2.07634e-149
Zbtb20	6.35963e-153	0.381485	0.81	0.687	1.16642e-148
Sulf1	7.19404e-153	0.500551	0.279	0.139	1.31946e-148
Anpep	2.47115e-152	0.456635	0.268	0.128	4.53234e-148
Vcan	4.24144e-152	0.563778	0.36	0.215	7.77922e-148
Slc4a4	6.49167e-152	0.52758	0.237	0.109	1.19064e-147
Rpl38	1.48127e-151	0.434282	0.758	0.63	2.7168e-147
Nfkbia	5.03198e-151	0.45207	0.679	0.55	9.22916e-147
Rps19	1.64636e-150	0.30671	0.864	0.711	3.01958e-146
Rpl36a	9.23826e-150	0.52349	0.681	0.562	1.69439e-145
Rpl36	9.69665e-150	0.372393	0.814	0.703	1.77846e-145
Naaa	1.1273e-148	0.443646	0.351	0.204	2.06759e-144
Carhsp1	1.00786e-147	0.542563	0.448	0.307	1.84851e-143
Ptx3	1.07614e-147	0.753709	0.218	0.095	1.97375e-143
Serpinf1	2.1799e-147	0.261296	0.784	0.543	3.99815e-143
Rpl28	4.86055e-147	0.358329	0.816	0.678	8.91474e-143
Edem2	9.39263e-146	0.492189	0.288	0.151	1.7227e-141
Rpsa	2.6016e-145	0.267846	0.81	0.62	4.7716e-141
Snx21	1.69129e-144	0.513923	0.292	0.156	3.10199e-140
Rplp2	1.07941e-143	0.409555	0.796	0.678	1.97975e-139
Sntb2	5.15941e-143	0.509259	0.47	0.327	9.46287e-139
Cpne8	1.39667e-142	0.388603	0.226	0.099	2.56163e-138
Rps13	1.35176e-141	0.34378	0.817	0.678	2.47926e-137
Hspb8	5.62177e-140	0.573463	0.327	0.193	1.03109e-135
Lamb2	3.30804e-138	0.364699	0.377	0.215	6.06728e-134
Gnpnat1	1.11122e-137	0.548709	0.309	0.179	2.0381e-133
Actg1	1.80013e-137	0.355698	0.764	0.623	3.30161e-133
Anxa2	3.02388e-137	0.411561	0.729	0.578	5.5461e-133
Twsg1	1.0082e-136	0.479669	0.291	0.156	1.84914e-132
Rps16	1.086e-136	0.282816	0.868	0.736	1.99183e-132
C1s1	2.08019e-136	0.411623	0.615	0.465	3.81528e-132
Rpl8	3.02824e-136	0.288284	0.831	0.696	5.5541e-132
Rpl35	5.55668e-136	0.485747	0.648	0.529	1.01915e-131
Plxdc2	2.58124e-135	0.348288	0.56	0.391	4.73426e-131
Ifi205	3.99876e-134	0.53164	0.38	0.237	7.33412e-130
Rpl22	4.52049e-134	0.435484	0.741	0.624	8.29103e-130
Hdac7	1.76041e-133	0.423639	0.292	0.155	3.22876e-129
C4b	1.2787e-130	0.563241	0.305	0.17	2.34527e-126
Dtnbp1	5.4027e-130	0.488734	0.461	0.335	9.9091e-126
Rock2	5.53406e-129	0.442979	0.476	0.336	1.015e-124
Rpl11	6.21485e-129	0.369287	0.803	0.699	1.13987e-124
Rpl39	1.96904e-128	0.351771	0.797	0.67	3.61141e-124
Col1a1	8.61237e-128	0.245108	0.696	0.469	1.57959e-123
Egfr	1.96789e-125	0.50738	0.417	0.281	3.60931e-121
Akr1b8	1.0015e-124	0.593342	0.264	0.145	1.83685e-120
Meg3	1.33032e-124	0.370251	0.603	0.416	2.43994e-120
Efemp2	1.98209e-124	0.438189	0.554	0.421	3.63536e-120
Rbpj	4.47366e-123	0.462487	0.288	0.161	8.20515e-119
Nptn	1.19733e-122	0.441547	0.517	0.394	2.19603e-118
Itgb5	1.69016e-121	0.466771	0.411	0.277	3.09992e-117
Il6	5.78196e-120	0.692591	0.205	0.094	1.06047e-115
Agap1	3.88051e-119	0.387352	0.216	0.102	7.11725e-115
Ybx3	1.4556e-117	0.423161	0.547	0.414	2.66972e-113
Rarres2	5.08248e-114	0.257566	0.761	0.565	9.32178e-110
Fau	7.19577e-114	0.314623	0.78	0.69	1.31978e-109
Cyr61	6.76738e-112	0.318094	0.49	0.332	1.2412e-107
Rps9	3.93874e-111	0.292584	0.818	0.668	7.22404e-107
Ramp2	1.45834e-109	0.259905	0.671	0.531	2.67474e-105
Diaph1	1.207e-106	0.389438	0.26	0.143	2.21377e-102
Prelp	1.56952e-106	0.330009	0.46	0.312	2.87866e-102
Mt1	9.81518e-106	0.631207	0.549	0.413	1.8002e-101
Ext1	3.48305e-105	0.438942	0.257	0.145	6.38826e-101
Pfdn5	6.40033e-103	0.347922	0.75	0.681	1.17388e-98
Atf3	8.53418e-103	0.417057	0.466	0.331	1.56525e-98
Pmepa1	1.13328e-102	0.368481	0.23	0.12	2.07854e-98
Ugp2	1.30563e-102	0.456924	0.361	0.245	2.39466e-98
Hsp90b1	4.89309e-102	0.286492	0.82	0.698	8.97441e-98
Rpl18a	9.25746e-100	0.213771	0.857	0.719	1.69791e-95
Npr1	2.54733e-99	0.410304	0.271	0.159	4.67206e-95
Adamtsl1	3.49847e-98	0.403005	0.31	0.19	6.41654e-94
Rack1	5.14144e-98	0.295608	0.746	0.615	9.42991e-94
Itih5	6.03158e-98	0.317823	0.6	0.461	1.10625e-93
Mrpl33	3.422e-97	0.397584	0.568	0.454	6.27629e-93
Fxyd1	6.58802e-97	0.253633	0.654	0.529	1.20831e-92
Ralbp1	1.34747e-96	0.38385	0.542	0.442	2.47139e-92
Rpl24	1.66702e-94	0.272215	0.822	0.715	3.05748e-90
Thbd	2.76983e-94	0.327018	0.301	0.178	5.08015e-90
Mtch1	6.06814e-93	0.406728	0.541	0.435	1.11296e-88
Cyb5a	4.00638e-92	0.273883	0.789	0.666	7.3481e-88
Atp2b1	1.20705e-91	0.353508	0.498	0.385	2.21386e-87
C1qtnf1	3.82644e-91	0.343635	0.208	0.108	7.01807e-87
Samhd1	1.10116e-89	0.381217	0.357	0.241	2.01963e-85
Tmsb10	4.35335e-89	0.212919	0.772	0.606	7.98449e-85
Calu	6.48481e-88	0.393669	0.573	0.472	1.18938e-83
Sdc2	1.21059e-87	0.371752	0.544	0.43	2.22034e-83
Rhoq	1.28145e-85	0.450115	0.245	0.146	2.35031e-81
Dpysl3	4.96164e-85	0.409242	0.309	0.202	9.10014e-81
Rpl12	8.765e-85	0.223233	0.778	0.629	1.60759e-80
Rps2	1.34557e-84	0.242338	0.771	0.636	2.46791e-80
Fam46a	1.72485e-84	0.378031	0.492	0.377	3.16355e-80
Slc44a1	4.47666e-83	0.351064	0.275	0.169	8.21064e-79
Fam129a	7.22796e-79	0.366982	0.322	0.217	1.32568e-74
Cxcl1	3.33696e-78	0.656961	0.446	0.328	6.12032e-74
Gpx1	1.02473e-76	0.383927	0.589	0.5	1.87945e-72
Trim35	3.34041e-76	0.379542	0.364	0.259	6.12664e-72
Cd164	1.26715e-75	0.407533	0.429	0.339	2.32409e-71
Glul	4.95362e-75	0.242224	0.507	0.399	9.08543e-71
Pid1	3.74909e-74	0.26903	0.23	0.131	6.87621e-70
Cast	1.74848e-73	0.364436	0.426	0.332	3.20689e-69
Gem	5.00243e-73	0.377377	0.341	0.236	9.17495e-69
Zbtb16	6.40731e-73	0.3555	0.221	0.13	1.17516e-68
Loxl2	2.85021e-71	0.356029	0.426	0.326	5.22757e-67
Use1	1.58153e-70	0.371482	0.543	0.463	2.90069e-66
Steap3	1.59331e-70	0.399168	0.327	0.233	2.92229e-66
Trip10	2.34378e-70	0.341744	0.316	0.218	4.29872e-66
Arl4a	2.89658e-70	0.313677	0.419	0.315	5.31261e-66
Slit3	6.93011e-70	0.354881	0.327	0.23	1.27105e-65
Clip1	1.17492e-69	0.385484	0.285	0.191	2.15492e-65
Nav1	3.12199e-68	0.301095	0.495	0.394	5.72603e-64
Tmem43	4.7762e-67	0.390118	0.232	0.146	8.76003e-63
Klhl13	1.61787e-66	0.351147	0.202	0.119	2.96734e-62
Smim1	4.87704e-66	0.377392	0.288	0.197	8.94498e-62
Serpine2	1.29728e-65	0.293252	0.459	0.352	2.37933e-61
Aig1	2.26321e-65	0.301599	0.271	0.176	4.15095e-61
Gprc5b	3.30648e-65	0.378274	0.244	0.157	6.06441e-61
Dlgap4	6.71926e-65	0.33293	0.324	0.23	1.23238e-60
Epb41l2	6.55556e-64	0.363868	0.397	0.307	1.20235e-59
Rps21	1.72279e-63	0.320984	0.709	0.625	3.15976e-59
Xdh	1.24865e-62	0.314365	0.331	0.238	2.29015e-58
Cltb	1.66841e-62	0.272446	0.467	0.374	3.06004e-58
Ccnl1	3.79479e-62	0.373974	0.563	0.49	6.96003e-58
Lima1	6.59255e-62	0.321052	0.469	0.381	1.20914e-57
Pam	2.00532e-61	0.356896	0.35	0.252	3.67796e-57
Fcgrt	3.83232e-61	0.259364	0.663	0.564	7.02885e-57
Nfe2l2	3.22247e-59	0.34203	0.387	0.302	5.91033e-55
Zeb1	7.21597e-59	0.338142	0.342	0.255	1.32348e-54
Fkbp2	8.45427e-59	0.34256	0.508	0.436	1.5506e-54
Bicc1	1.08339e-58	0.279187	0.419	0.321	1.98704e-54
Lamp1	1.69055e-58	0.241479	0.738	0.669	3.10064e-54
Kcnq1ot1	2.28576e-58	0.354664	0.477	0.399	4.19231e-54
Sult5a1	8.3683e-57	0.333795	0.319	0.228	1.53483e-52
Nucb2	2.36699e-56	0.322107	0.344	0.258	4.3413e-52
Samd4b	2.43291e-56	0.340491	0.225	0.145	4.4622e-52
Cmtm3	5.70665e-55	0.327383	0.405	0.323	1.04666e-50
Jak1	1.16332e-54	0.295108	0.524	0.454	2.13365e-50
Rnh1	1.49965e-54	0.318942	0.488	0.409	2.7505e-50
Stx4a	1.60755e-54	0.338552	0.401	0.317	2.94842e-50
Eef2	4.34361e-54	0.269108	0.728	0.672	7.96662e-50
Ptp4a2	1.78499e-53	0.293923	0.556	0.492	3.27384e-49
Efcab14	6.19729e-53	0.329821	0.268	0.188	1.13664e-48
Zfhx4	2.17879e-50	0.387665	0.3	0.225	3.99612e-46
Thbs2	5.25436e-50	0.332525	0.235	0.157	9.63702e-46
Rbms3	1.48368e-49	0.285075	0.268	0.187	2.72121e-45
Sec14l1	5.64931e-49	0.257954	0.219	0.143	1.03614e-44
Zbp1	6.52724e-49	0.384036	0.256	0.18	1.19716e-44
Rhoc	1.8163e-48	0.251449	0.596	0.514	3.33128e-44
Prdx5	6.42886e-48	0.326675	0.591	0.531	1.17912e-43
Fuca1	5.69392e-47	0.292016	0.491	0.42	1.04432e-42
Apbb2	1.93379e-46	0.22473	0.241	0.159	3.54677e-42
Sdf2l1	1.48557e-45	0.354745	0.316	0.246	2.72469e-41
Camk2d	2.07385e-45	0.316346	0.351	0.278	3.80366e-41
Rpl7a	7.77817e-45	0.289188	0.564	0.506	1.42659e-40
Palm	2.52834e-43	0.271861	0.269	0.196	4.63723e-39
Nqo2	3.65012e-42	0.325659	0.213	0.148	6.69468e-38
Aldh1a1	1.8416e-41	0.230671	0.24	0.167	3.37768e-37
Slc29a1	2.75771e-41	0.232827	0.449	0.371	5.05791e-37
Aida	9.16917e-41	0.290672	0.375	0.309	1.68172e-36
Foxo1	9.44595e-41	0.309688	0.255	0.186	1.73248e-36
Ptgfrn	1.83746e-40	0.297662	0.277	0.208	3.37009e-36
Rhoa	8.52831e-40	0.241043	0.644	0.609	1.56418e-35
Capg	7.81751e-39	0.204341	0.483	0.396	1.43381e-34
Eef1d	8.59961e-38	0.25629	0.628	0.56	1.57725e-33
Lysmd2	6.18742e-37	0.267445	0.363	0.297	1.13484e-32
Rpn2	1.42115e-36	0.252328	0.624	0.565	2.60653e-32
Txndc5	2.51282e-36	0.244555	0.525	0.459	4.60877e-32
Sspn	2.61519e-36	0.291301	0.218	0.156	4.79652e-32
Galnt1	4.14405e-36	0.333976	0.267	0.208	7.6006e-32
Thra	6.41659e-36	0.272763	0.38	0.318	1.17687e-31
Rap1b	9.5195e-36	0.223808	0.542	0.492	1.74597e-31
Sh3d19	1.97829e-35	0.298043	0.26	0.198	3.62839e-31
Mindy2	7.99943e-35	0.241981	0.262	0.195	1.46718e-30
Golim4	9.00918e-35	0.323873	0.343	0.287	1.65237e-30
Gm10073	2.47743e-34	0.323561	0.344	0.293	4.54385e-30
Tns2	2.51115e-34	0.25999	0.261	0.196	4.60571e-30
Lamp2	1.43006e-33	0.203833	0.586	0.526	2.62288e-29
Ctdsp2	2.7839e-33	0.278925	0.34	0.28	5.10596e-29
Lamb1	4.41746e-32	0.210321	0.479	0.414	8.10207e-28
Sash1	6.13795e-32	0.273942	0.351	0.291	1.12576e-27
Tmem159	4.01556e-31	0.256182	0.34	0.279	7.36493e-27
Celf2	4.7954e-31	0.201624	0.547	0.479	8.79524e-27
Lgals9	2.74866e-30	0.257442	0.375	0.323	5.04132e-26
Pnp	1.41268e-29	0.267363	0.458	0.401	2.591e-25
Etfa	1.42509e-29	0.208105	0.481	0.428	2.61376e-25
Dhrs7	2.32984e-28	0.233562	0.412	0.361	4.27316e-24
Rps27rt	5.49896e-28	0.211005	0.346	0.287	1.00856e-23
Pdlim2	1.64152e-27	0.231518	0.348	0.288	3.0107e-23
Ifi211	4.01783e-27	0.277486	0.207	0.156	7.3691e-23
Aes	7.20662e-27	0.206428	0.543	0.511	1.32177e-22
Ski	2.2787e-26	0.240601	0.266	0.212	4.17937e-22
2022-03-02	4.30755e-26	0.213285	0.377	0.327	7.90048e-22
Slc1a5	1.37635e-25	0.237646	0.451	0.405	2.52437e-21
Pbx1	8.2148e-25	0.274592	0.286	0.237	1.50668e-20
Dap	1.10963e-24	0.222523	0.48	0.433	2.03518e-20
Cndp2	8.77449e-24	0.269103	0.288	0.245	1.60933e-19
Atp6v1e1	1.09252e-22	0.250063	0.37	0.335	2.0038e-18
Dapk1	1.43501e-21	0.24817	0.303	0.258	2.63194e-17
Rpl9	2.80691e-21	0.248061	0.33	0.293	5.14816e-17
Man2a1	1.29319e-20	0.280063	0.288	0.247	2.37185e-16
Sqor	1.59486e-20	0.243996	0.243	0.2	2.92513e-16
Ergic1	2.41369e-19	0.292317	0.234	0.196	4.42694e-15
Bin1	7.41996e-19	0.229931	0.232	0.19	1.36089e-14
Ifi207	1.77048e-18	0.218496	0.371	0.333	3.24723e-14
Ube2r2	8.00369e-18	0.233594	0.401	0.377	1.46796e-13
Abca1	9.14905e-18	0.248022	0.21	0.17	1.67803e-13
Mrpl23	3.16437e-17	0.211851	0.439	0.415	5.80378e-13
Cyfip1	4.2895e-17	0.227311	0.245	0.206	7.86737e-13
Cebpb	6.00615e-17	0.216749	0.494	0.441	1.10159e-12
Npepps	1.44587e-16	0.248378	0.235	0.199	2.65187e-12
Fam102b	3.7568e-16	0.221454	0.217	0.179	6.89034e-12
Grb10	5.99631e-16	0.238932	0.261	0.225	1.09978e-11
Chp1	1.12311e-15	0.261047	0.292	0.265	2.0599e-11
BC005537	5.33103e-15	0.21174	0.371	0.349	9.77765e-11
Mrpl52	7.15315e-15	0.230732	0.461	0.436	1.31196e-10
Nckap1	1.13766e-14	0.227385	0.257	0.226	2.08657e-10
Rpl10-ps3	4.30699e-14	0.249823	0.209	0.178	7.89945e-10
Aldh7a1	5.13318e-14	0.249319	0.216	0.186	9.41477e-10
Sh3gl1	6.26771e-14	0.211307	0.26	0.228	1.14956e-09
Cnih1	6.76321e-14	0.244751	0.362	0.347	1.24044e-09
Chst12	9.03023e-14	0.205789	0.261	0.23	1.65623e-09
Glipr2	1.31673e-13	0.216521	0.24	0.208	2.41501e-09
Wls	3.21323e-13	0.204556	0.296	0.269	5.89339e-09
Ptp4a1	4.15915e-13	0.229389	0.298	0.273	7.6283e-09
Fndc3b	8.04839e-13	0.207159	0.335	0.308	1.47615e-08
Ppa1	2.58674e-12	0.22503	0.29	0.265	4.74434e-08
Pdcd6ip	2.93735e-11	0.205696	0.259	0.234	5.38739e-07
Nisch	6.31944e-11	0.208122	0.384	0.365	1.15905e-06
Mia3	1.78208e-10	0.216699	0.278	0.257	3.26851e-06
Twist1	9.46826e-10	0.222409	0.205	0.182	1.73657e-05
Eif4b	5.21826e-09	0.206947	0.311	0.301	9.57081e-05
Nsa2	9.87742e-09	0.207077	0.323	0.313	0.000181162
Eif4e	0.00113824	0.25873	0.298	0.308	1
Socs3	0.0259111	0.222504	0.403	0.412	1

## Sheet: ASC Cluster3
	p_val	avg_logFC	pct.1	pct.2	p_val_adj
Cxcl9	0	1.55341	0.767	0.167	0
Timp1	0	1.50976	0.667	0.157	0
Saa3	0	1.43783	0.239	0.047	0
Lpl	0	1.36595	0.93	0.442	0
Ccl2	0	1.34858	0.402	0.136	0
Cxcl10	0	1.30726	0.487	0.104	0
Tmem176b	0	1.27197	0.901	0.31	0
Tmem176a	0	1.26931	0.843	0.241	0
Ccl7	0	1.19535	0.475	0.182	0
Npc2	0	1.16597	0.903	0.483	0
Col6a1	0	1.07992	0.954	0.456	0
Bgn	0	1.07545	0.934	0.38	0
Serpinh1	0	1.07453	0.981	0.568	0
Cd63	0	1.04061	0.964	0.523	0
Ctsh	0	1.02137	0.883	0.388	0
Lgals3bp	0	1.01035	0.897	0.384	0
Col6a3	0	0.993772	0.934	0.408	0
Enpp2	0	0.98953	0.832	0.294	0
Col6a2	0	0.951011	0.928	0.413	0
B2m	0	0.937254	0.971	0.695	0
Cpxm1	0	0.915893	0.779	0.271	0
Lum	0	0.907139	0.893	0.355	0
Cyp1b1	0	0.907128	0.76	0.2	0
Rcn3	0	0.9044	0.895	0.443	0
H2-K1	0	0.895969	0.911	0.555	0
Isg15	0	0.870782	0.638	0.314	0
Pcolce	0	0.857466	0.921	0.496	0
Ifit3	0	0.854467	0.452	0.162	0
Col15a1	0	0.839308	0.913	0.333	0
Ftl1	0	0.834496	0.945	0.587	0
Col1a1	0	0.821797	0.899	0.418	0
Col1a2	0	0.820568	0.961	0.499	0
Lypd1	0	0.812554	0.442	0.084	0
Col4a1	0	0.811516	0.943	0.475	0
Col5a2	0	0.804883	0.909	0.424	0
Ifit1	0	0.803429	0.474	0.156	0
Col3a1	0	0.781067	0.963	0.477	0
Bmper	0	0.778515	0.702	0.205	0
Srpx	0	0.777487	0.828	0.364	0
Serf2	0	0.776411	0.937	0.636	0
Sparc	0	0.775878	0.977	0.631	0
Fbln7	0	0.764396	0.613	0.168	0
AW112010	0	0.757924	0.745	0.388	0
Cthrc1	0	0.745469	0.37	0.068	0
Adam12	0	0.740497	0.507	0.102	0
Rplp0	0	0.735253	0.953	0.644	0
Fst	0	0.729579	0.76	0.336	0
Rarres2	0	0.722	0.918	0.525	0
Bst2	0	0.718795	0.813	0.503	0
Calr	0	0.716837	0.885	0.557	0
Vcam1	0	0.706606	0.651	0.19	0
Col5a1	0	0.703401	0.855	0.382	0
Ifitm3	0	0.701683	0.941	0.639	0
Mmp14	0	0.694554	0.822	0.381	0
Fgf10	0	0.692635	0.471	0.111	0
H2-Q7	0	0.687104	0.737	0.291	0
Ubd	0	0.684437	0.267	0.039	0
Cstb	0	0.681364	0.816	0.451	0
Iigp1	0	0.679867	0.687	0.296	0
Ccl8	0	0.670536	0.334	0.105	0
P4hb	0	0.668106	0.854	0.446	0
Ppib	0	0.666298	0.936	0.652	0
Apoe	0	0.660615	0.719	0.323	0
Gpx7	0	0.660358	0.799	0.347	0
Igf1	0	0.659915	0.682	0.306	0
Creg1	0	0.659586	0.775	0.356	0
Grn	0	0.656489	0.855	0.46	0
Col4a2	0	0.656303	0.922	0.465	0
Thbs1	0	0.645932	0.377	0.091	0
Ctsc	0	0.638263	0.502	0.119	0
Mt1	0	0.638112	0.683	0.379	0
Dpep1	0	0.634048	0.879	0.488	0
Fkbp11	0	0.633442	0.6	0.183	0
Cp	0	0.626495	0.817	0.324	0
Angptl4	0	0.623315	0.756	0.31	0
Sned1	0	0.623219	0.486	0.121	0
Mfap2	0	0.622824	0.661	0.267	0
Tmem119	0	0.621158	0.487	0.12	0
Ccl11	0	0.620109	0.899	0.435	0
Tmed3	0	0.617663	0.896	0.48	0
Plin2	0	0.6172	0.773	0.371	0
H2-D1	0	0.615809	0.939	0.671	0
Irf7	0	0.615227	0.644	0.249	0
Mgst1	0	0.613641	0.931	0.56	0
Lgals1	0	0.611691	0.921	0.582	0
Rrbp1	0	0.608103	0.931	0.566	0
Lgmn	0	0.605879	0.615	0.22	0
Rpl10a	0	0.604101	0.919	0.604	0
H2-T22	0	0.603508	0.8	0.394	0
Pdia6	0	0.595086	0.837	0.506	0
Ssr4	0	0.586805	0.824	0.482	0
Vkorc1	0	0.574966	0.834	0.425	0
Col18a1	0	0.574594	0.589	0.193	0
P2rx4	0	0.560096	0.565	0.191	0
Dclk1	0	0.554992	0.577	0.192	0
Hexa	0	0.554858	0.805	0.404	0
Cxcl1	0	0.55458	0.586	0.293	0
Loxl1	0	0.552034	0.841	0.403	0
Retsat	0	0.547259	0.417	0.105	0
C1qtnf6	0	0.546636	0.589	0.192	0
Serpinf1	0	0.541169	0.934	0.504	0
Gm4951	0	0.533183	0.404	0.11	0
Cxcl16	0	0.530872	0.49	0.131	0
Htra3	0	0.529106	0.854	0.441	0
Cnpy2	0	0.526148	0.861	0.477	0
Pdia3	0	0.522796	0.923	0.624	0
Mdk	0	0.52173	0.459	0.138	0
Fkbp10	0	0.51945	0.61	0.223	0
Snhg18	0	0.516921	0.683	0.297	0
Mmp2	0	0.514269	0.875	0.423	0
Ctsb	0	0.505062	0.887	0.598	0
Ppic	0	0.504949	0.853	0.465	0
Ssr2	0	0.504801	0.843	0.479	0
Gabarap	0	0.50417	0.885	0.583	0
Hsp90b1	0	0.503483	0.913	0.674	0
Ifi204	0	0.502904	0.75	0.349	0
Kdelr3	0	0.498899	0.681	0.268	0
Peg3	0	0.498539	0.356	0.091	0
Arpc1b	0	0.4974	0.9	0.591	0
Pdgfra	0	0.495482	0.763	0.34	0
Adam23	0	0.494732	0.507	0.149	0
Ly6e	0	0.493633	0.895	0.595	0
Rpl22l1	0	0.486748	0.907	0.605	0
Sec61b	0	0.485428	0.839	0.519	0
Emilin1	0	0.484237	0.514	0.156	0
Itm2b	0	0.483081	0.959	0.726	0
Maged2	0	0.482001	0.603	0.251	0
Tmem167	0	0.480804	0.819	0.427	0
Mt2	0	0.479945	0.637	0.332	0
Tmsb10	0	0.472368	0.903	0.573	0
Scarb2	0	0.471337	0.656	0.262	0
Ifitm2	0	0.470246	0.93	0.627	0
Mme	0	0.466788	0.477	0.159	0
Cmbl	0	0.464151	0.416	0.138	0
Rpl41	0	0.463107	0.892	0.587	0
Tceal9	0	0.461638	0.82	0.468	0
Txndc5	0	0.455808	0.801	0.394	0
Maged1	0	0.454898	0.739	0.356	0
Hist1h2bc	0	0.453941	0.718	0.35	0
Hmox1	0	0.453086	0.397	0.13	0
Oasl2	0	0.451194	0.504	0.166	0
Ddost	0	0.448488	0.834	0.456	0
Rpl15	0	0.447127	0.911	0.635	0
Rab13	0	0.444211	0.517	0.174	0
P3h1	0	0.443419	0.483	0.157	0
Rps6	0	0.443164	0.944	0.694	0
Rpl3	0	0.442899	0.927	0.673	0
Ccdc80	0	0.441616	0.881	0.458	0
Ctsz	0	0.440229	0.84	0.497	0
Ifi203	0	0.43982	0.681	0.322	0
Ms4a4d	0	0.43796	0.68	0.302	0
Fkbp9	0	0.437878	0.817	0.441	0
Ckap4	0	0.43667	0.699	0.311	0
Casp4	0	0.434156	0.429	0.131	0
Slc1a3	0	0.433488	0.371	0.116	0
Oaf	0	0.432273	0.777	0.393	0
Ostc	0	0.424475	0.807	0.454	0
Mrc2	0	0.42431	0.539	0.2	0
Sec61g	0	0.423297	0.834	0.525	0
Fkbp7	0	0.422559	0.8	0.423	0
Tmed9	0	0.42065	0.852	0.534	0
Trabd2b	0	0.417966	0.297	0.07	0
Aprt	0	0.416322	0.676	0.301	0
Ifi207	0	0.416094	0.644	0.27	0
Erp29	0	0.415645	0.813	0.44	0
Ryk	0	0.414749	0.552	0.212	0
Rpl6	0	0.413438	0.945	0.694	0
Rpl12	0	0.412334	0.897	0.599	0
Sdc1	0	0.412088	0.342	0.09	0
Ctsk	0	0.41205	0.639	0.285	0
Olfml3	0	0.411598	0.502	0.169	0
Col5a3	0	0.411072	0.781	0.326	0
Mmp19	0	0.410808	0.386	0.113	0
Igsf10	0	0.410676	0.434	0.133	0
Akr1b3	0	0.407592	0.735	0.397	0
Ifit3b	0	0.407421	0.216	0.047	0
Lman1	0	0.407227	0.758	0.387	0
Loxl2	0	0.402728	0.64	0.275	0
Pdia4	0	0.4012	0.619	0.285	0
Plod1	0	0.400754	0.612	0.245	0
Lhx8	0	0.398117	0.247	0.051	0
Rpl32	0	0.398038	0.954	0.704	0
Tnfaip6	0	0.396262	0.614	0.267	0
Meox1	0	0.3947	0.415	0.141	0
Arf5	0	0.393172	0.866	0.556	0
Hdlbp	0	0.392276	0.73	0.375	0
Adamts12	0	0.392272	0.401	0.139	0
Rnf213	0	0.390053	0.437	0.152	0
Mydgf	0	0.390017	0.76	0.382	0
Rtp4	0	0.38608	0.617	0.261	0
Ccnd2	0	0.384407	0.763	0.408	0
Mxra8	0	0.38358	0.73	0.359	0
Gpm6b	0	0.382726	0.691	0.242	0
Efemp2	0	0.37992	0.756	0.372	0
Sparcl1	0	0.379282	0.89	0.484	0
Sox4	0	0.375605	0.474	0.183	0
Rcn1	0	0.375079	0.758	0.372	0
Fcgrt	0	0.369773	0.858	0.518	0
Bsg	0	0.368155	0.895	0.627	0
Crtap	0	0.368096	0.599	0.268	0
Fth1	0	0.367605	0.962	0.662	0
Slfn5	0	0.36619	0.836	0.449	0
Sar1a	0	0.365516	0.769	0.415	0
Ifi44	0	0.365409	0.243	0.053	0
Fscn1	0	0.363242	0.607	0.228	0
Fam46a	0	0.362355	0.683	0.331	0
Fstl1	0	0.361788	0.903	0.52	0
Srm	0	0.361252	0.566	0.25	0
Tpt1	0	0.358932	0.963	0.73	0
Gsto1	0	0.358537	0.425	0.142	0
F3	0	0.355902	0.717	0.299	0
Il1r1	0	0.353972	0.499	0.2	0
Postn	0	0.353327	0.724	0.272	0
Surf4	0	0.352617	0.651	0.314	0
Ap3s1	0	0.349449	0.73	0.346	0
Spcs1	0	0.347984	0.854	0.551	0
Capg	0	0.345223	0.687	0.348	0
Gaa	0	0.344538	0.59	0.263	0
Mafb	0	0.343847	0.505	0.224	0
Scn1b	0	0.341786	0.51	0.2	0
Ergic3	0	0.341781	0.811	0.456	0
Aspn	0	0.341697	0.795	0.41	0
Arf4	0	0.338629	0.883	0.585	0
Npdc1	0	0.337244	0.737	0.386	0
Serf1	0	0.3364	0.479	0.179	0
Il11ra1	0	0.335782	0.829	0.408	0
Sh3bgrl3	0	0.334636	0.798	0.478	0
Chpf	0	0.334445	0.521	0.206	0
Colgalt1	0	0.334154	0.621	0.282	0
Mmp23	0	0.334058	0.646	0.29	0
Eva1b	0	0.333757	0.776	0.394	0
Tceal8	0	0.331655	0.691	0.353	0
Praf2	0	0.331531	0.47	0.173	0
Pofut2	0	0.326601	0.567	0.262	0
P3h4	0	0.325684	0.517	0.222	0
Arl1	0	0.324332	0.791	0.464	0
P4ha1	0	0.324219	0.595	0.27	0
Krtcap2	0	0.323501	0.881	0.563	0
Zbp1	0	0.321357	0.394	0.147	0
Phf11d	0	0.319227	0.388	0.142	0
Clmp	0	0.318718	0.544	0.229	0
Cd302	0	0.318477	0.845	0.472	0
Mndal	0	0.316562	0.668	0.336	0
Dapk1	0	0.316141	0.494	0.214	0
Thbs2	0	0.314906	0.356	0.127	0
Ifi205	0	0.314373	0.489	0.209	0
Pdia5	0	0.313712	0.332	0.103	0
Aoc3	0	0.313273	0.509	0.201	0
Lamp2	0	0.312178	0.799	0.476	0
Fdxr	0	0.310658	0.273	0.074	0
Serp1	0	0.310484	0.673	0.347	0
Mlec	0	0.310132	0.593	0.273	0
Traf4	0	0.309147	0.348	0.123	0
Tmem106a	0	0.309136	0.377	0.132	0
Stat1	0	0.308526	0.481	0.205	0
C1qtnf12	0	0.308041	0.443	0.179	0
Copz2	0	0.307431	0.716	0.379	0
Dap	0	0.307124	0.709	0.379	0
Por	0	0.306902	0.557	0.258	0
Bcat1	0	0.306668	0.253	0.067	0
Grina	0	0.305445	0.627	0.299	0
Csad	0	0.305385	0.381	0.148	0
Celf2	0	0.305344	0.76	0.429	0
Fzd1	0	0.305267	0.298	0.093	0
H2-Q6	0	0.303818	0.42	0.153	0
Idh1	0	0.300172	0.59	0.276	0
Glb1	0	0.298	0.356	0.12	0
Layn	0	0.296679	0.255	0.068	0
Ift20	0	0.296655	0.72	0.396	0
Aebp1	0	0.295169	0.839	0.454	0
Lmo4	0	0.293403	0.591	0.244	0
Rbp1	0	0.292483	0.499	0.206	0
Chid1	0	0.291589	0.34	0.122	0
Htatip2	0	0.290406	0.446	0.175	0
Sra1	0	0.2889	0.7	0.371	0
Nid2	0	0.285523	0.445	0.187	0
Tusc5	0	0.284402	0.256	0.071	0
Tfpi	0	0.282951	0.463	0.189	0
Pld3	0	0.281044	0.41	0.15	0
Gusb	0	0.280548	0.493	0.215	0
Prkar2b	0	0.279132	0.43	0.136	0
P3h3	0	0.276415	0.573	0.263	0
Lamb1	0	0.274307	0.717	0.358	0
Sec22b	0	0.262988	0.618	0.295	0
Eif4ebp1	0	0.262976	0.691	0.346	0
Itih5	0	0.258822	0.764	0.421	0
Cxcl14	0	0.257253	0.663	0.234	0
Igfbp7	0	0.257042	0.953	0.609	0
Nnmt	0	0.249682	0.623	0.293	0
Xaf1	0	0.249003	0.515	0.22	0
Acp5	0	0.236477	0.261	0.078	0
Angptl2	0	0.233831	0.719	0.352	0
Apod	0	0.231257	0.609	0.298	0
Hspg2	0	0.22944	0.793	0.429	0
Enpep	0	0.225876	0.424	0.166	0
Entpd2	0	0.225767	0.724	0.374	0
Cygb	0	0.220788	0.847	0.39	0
Gpx3	0	0.204652	0.801	0.436	0
Dnajb1	5.18556e-308	0.498532	0.55	0.277	9.51083e-304
2022-03-05	1.24504e-306	0.214504	0.606	0.282	2.28353e-302
Svbp	1.72549e-305	0.25665	0.658	0.338	3.16472e-301
Htra1	3.52264e-305	0.276505	0.826	0.48	6.46087e-301
Ttc3	7.18018e-304	0.272768	0.571	0.278	1.31692e-299
Tmed2	1.17527e-303	0.350369	0.864	0.56	2.15557e-299
2022-09-08	2.11726e-303	0.248807	0.54	0.251	3.88326e-299
Ost4	8.18759e-303	0.355578	0.827	0.527	1.50169e-298
Prdx4	9.29228e-302	0.33242	0.738	0.435	1.7043e-297
Serpine1	3.09254e-301	0.302241	0.426	0.177	5.67202e-297
1110008F13Rik	1.1835e-298	0.226196	0.729	0.381	2.17067e-294
Apex1	1.27774e-298	0.286618	0.373	0.145	2.34351e-294
Gstm2	2.65013e-298	0.245633	0.629	0.321	4.8606e-294
Egr2	6.27786e-298	0.302256	0.294	0.099	1.15142e-293
Apoc1	1.53217e-297	0.395728	0.236	0.068	2.81015e-293
Pabpc1	2.54941e-295	0.353156	0.823	0.532	4.67587e-291
Enc1	8.43388e-295	0.271131	0.215	0.057	1.54686e-290
Gstm5	1.34909e-294	0.266844	0.577	0.287	2.47436e-290
Tcf7l2	1.87348e-293	0.2387	0.431	0.181	3.43614e-289
Mxra7	4.21558e-293	0.270969	0.575	0.28	7.73179e-289
Iah1	8.18778e-292	0.266147	0.609	0.31	1.50172e-287
Rps3a1	2.29871e-291	0.336916	0.95	0.694	4.21607e-287
Kdelr1	3.58298e-291	0.269252	0.751	0.421	6.57154e-287
Mif	1.15427e-289	0.372838	0.689	0.382	2.11705e-285
Rps28	9.8462e-288	0.351745	0.899	0.638	1.80589e-283
Scpep1	3.99472e-286	0.271309	0.505	0.234	7.32671e-282
Nupr1	3.98063e-284	0.240151	0.743	0.398	7.30087e-280
Rps9	1.07283e-283	0.33492	0.925	0.64	1.96767e-279
Prrx2	3.64702e-283	0.26352	0.28	0.092	6.68899e-279
Igsf8	4.42421e-283	0.278998	0.435	0.19	8.11444e-279
Rps2	2.36129e-282	0.391112	0.873	0.61	4.33085e-278
Cdk4	6.48577e-282	0.230418	0.697	0.359	1.18955e-277
Cdc42ep5	3.22948e-281	0.223776	0.388	0.154	5.92319e-277
Srpx2	5.64146e-280	0.273943	0.346	0.132	1.0347e-275
Erlec1	7.35405e-280	0.264577	0.57	0.284	1.34881e-275
Rpl24	1.12525e-279	0.343787	0.935	0.687	2.06382e-275
Gstt1	2.92168e-279	0.231849	0.633	0.328	5.35865e-275
Rps19	1.9604e-277	0.343782	0.943	0.69	3.59557e-273
Eef1g	1.75582e-276	0.394516	0.844	0.588	3.22034e-272
Rpl39	5.31017e-275	0.347921	0.903	0.643	9.73938e-271
Trafd1	3.06716e-274	0.216355	0.407	0.17	5.62547e-270
Eif1a	9.73922e-274	0.251982	0.482	0.225	1.78627e-269
Ifih1	1.91035e-273	0.315674	0.358	0.143	3.50378e-269
Glmp	3.859e-273	0.235563	0.577	0.29	7.07779e-269
Slc38a10	6.60068e-273	0.25121	0.507	0.242	1.21063e-268
Nucb1	7.21381e-273	0.233176	0.702	0.382	1.32308e-268
Naa50	8.75756e-273	0.206273	0.527	0.242	1.60622e-268
Anxa5	9.07265e-273	0.345684	0.822	0.545	1.66401e-268
Morf4l2	2.17219e-272	0.264322	0.777	0.463	3.98401e-268
Fap	2.44691e-272	0.26129	0.386	0.157	4.48788e-268
Tnfaip2	5.20513e-272	0.266724	0.316	0.116	9.54673e-268
H13	5.60788e-272	0.230825	0.646	0.343	1.02854e-267
Sdf2	5.75287e-272	0.235432	0.602	0.314	1.05513e-267
Yipf5	1.07445e-269	0.238517	0.503	0.241	1.97065e-265
Tfpi2	1.29787e-269	0.236924	0.22	0.063	2.38042e-265
Mrpl17	1.93658e-269	0.240579	0.647	0.335	3.55188e-265
Plod3	2.00959e-269	0.231576	0.386	0.161	3.68579e-265
Rps27a	7.08902e-269	0.321879	0.944	0.689	1.3002e-264
Tspan31	5.1053e-268	0.208792	0.522	0.251	9.36363e-264
Vcan	6.71382e-268	0.241184	0.441	0.194	1.23138e-263
Icam1	8.05631e-268	0.201599	0.429	0.185	1.47761e-263
Sec11a	1.11278e-267	0.237525	0.758	0.444	2.04095e-263
Fam114a1	1.07091e-266	0.22448	0.447	0.196	1.96416e-262
Cd320	4.74447e-266	0.28437	0.323	0.125	8.70183e-262
Dram1	8.94122e-265	0.271712	0.28	0.098	1.63991e-260
Hspa5	9.82339e-265	0.486641	0.819	0.581	1.80171e-260
Rhoj	5.84967e-264	0.235826	0.795	0.461	1.07289e-259
Ikbip	8.89708e-263	0.212934	0.493	0.23	1.63181e-258
Daxx	6.78149e-260	0.241823	0.303	0.113	1.24379e-255
Rtraf	1.10862e-259	0.26431	0.837	0.526	2.03332e-255
Ptov1	6.0795e-259	0.225976	0.678	0.371	1.11504e-254
Ifi27l2a	3.78709e-258	0.462149	0.666	0.401	6.94591e-254
Mosmo	9.61303e-258	0.255633	0.313	0.12	1.76313e-253
Cope	2.51588e-255	0.251618	0.749	0.452	4.61437e-251
Thsd7a	1.24435e-254	0.240803	0.293	0.105	2.28226e-250
Kdelr2	3.91223e-254	0.320139	0.579	0.313	7.17543e-250
Rps3	8.58927e-254	0.300985	0.947	0.707	1.57536e-249
Tor1aip2	7.46046e-253	0.230005	0.437	0.2	1.36832e-248
Cyb5a	1.82096e-252	0.307227	0.899	0.639	3.33983e-248
Il3ra	6.26786e-252	0.21303	0.432	0.192	1.14959e-247
Selenom	4.26476e-251	0.229929	0.838	0.5	7.822e-247
Tor3a	6.76075e-251	0.229814	0.359	0.147	1.23999e-246
Twist2	4.42901e-250	0.250995	0.26	0.089	8.12324e-246
Socs1	5.98539e-250	0.277362	0.447	0.208	1.09778e-245
Copb2	7.90402e-250	0.234763	0.558	0.287	1.44968e-245
Ggt5	2.10043e-249	0.228783	0.321	0.122	3.8524e-245
Nav3	4.56422e-249	0.259463	0.266	0.095	8.37123e-245
Clip3	1.9602e-248	0.208577	0.258	0.086	3.5952e-244
Prdx2	3.20241e-248	0.313363	0.764	0.486	5.87353e-244
Rpl18a	4.04866e-248	0.315351	0.941	0.697	7.42564e-244
Pnp	2.1204e-247	0.243412	0.637	0.359	3.88903e-243
Sfxn1	1.89226e-246	0.214919	0.669	0.359	3.47059e-242
Rps15a	1.35198e-245	0.288768	0.936	0.692	2.47967e-241
Pon3	2.47642e-245	0.227141	0.249	0.084	4.542e-241
Prelid1	3.49949e-245	0.22463	0.711	0.4	6.41842e-241
Vmp1	1.60873e-244	0.200635	0.412	0.185	2.95057e-240
Uhrf2	2.81873e-244	0.225037	0.458	0.216	5.16983e-240
2810004N23Rik	1.28335e-243	0.224703	0.349	0.146	2.35379e-239
Rpl13	4.20931e-243	0.31147	0.964	0.708	7.7203e-239
S100a6	1.52913e-242	0.257734	0.886	0.567	2.80458e-238
Slc35b2	2.04368e-242	0.223885	0.461	0.22	3.74831e-238
Rps4x	4.84625e-241	0.300628	0.935	0.66	8.88851e-237
Adamts4	7.86165e-241	0.249724	0.231	0.074	1.4419e-236
Eef1a1	1.02053e-239	0.302996	0.969	0.755	1.87175e-235
Osmr	1.55985e-239	0.222001	0.365	0.154	2.86093e-235
Wipi1	2.81274e-239	0.213013	0.406	0.18	5.15885e-235
Irgm2	7.27063e-239	0.229082	0.264	0.093	1.33351e-234
Lox	7.48822e-238	0.226156	0.292	0.108	1.37341e-233
Glt8d1	5.57347e-237	0.202993	0.339	0.138	1.02223e-232
Ifi47	1.82093e-236	0.240172	0.284	0.104	3.33976e-232
Eif2ak2	2.41136e-236	0.237715	0.343	0.144	4.42267e-232
Rexo2	1.26162e-235	0.263242	0.779	0.477	2.31394e-231
Irgm1	1.05098e-234	0.216827	0.409	0.183	1.92759e-230
Serpinb6a	1.56806e-234	0.226732	0.818	0.504	2.87599e-230
Snai1	2.02927e-234	0.244283	0.255	0.09	3.72189e-230
Sh3pxd2a	1.52568e-233	0.245419	0.329	0.137	2.79825e-229
Grb14	1.58401e-233	0.299971	0.243	0.086	2.90524e-229
Lrrc59	2.15925e-233	0.216282	0.482	0.231	3.96029e-229
Slfn8	3.71256e-233	0.236408	0.207	0.064	6.80921e-229
Hacd1	1.04058e-232	0.21237	0.404	0.183	1.90853e-228
Vim	3.14335e-232	0.351634	0.894	0.659	5.76522e-228
Ctsa	1.03707e-229	0.20312	0.464	0.224	1.90208e-225
Pebp1	1.20879e-229	0.292084	0.788	0.513	2.21705e-225
Rpl26	2.5457e-229	0.293451	0.932	0.665	4.66907e-225
Baiap2	4.14637e-229	0.215317	0.317	0.128	7.60486e-225
Tapbp	4.54632e-229	0.229027	0.781	0.487	8.3384e-225
Colec12	3.67543e-228	0.202277	0.394	0.175	6.74111e-224
Chmp4b	2.04211e-227	0.210642	0.709	0.41	3.74544e-223
Apbb1ip	5.13022e-227	0.201471	0.352	0.148	9.40934e-223
P2ry14	7.19943e-227	0.213081	0.207	0.064	1.32045e-222
Sfr1	1.92707e-226	0.223645	0.839	0.542	3.53444e-222
Rpl4	2.00747e-226	0.307537	0.918	0.672	3.6819e-222
Ctsl	5.00391e-225	0.34153	0.827	0.571	9.17767e-221
Rpsa	3.04522e-224	0.311019	0.863	0.604	5.58524e-220
Ptx3	3.47554e-224	0.367639	0.246	0.086	6.37448e-220
1110065P20Rik	1.52405e-223	0.219046	0.419	0.198	2.79526e-219
Pgm2	1.71644e-223	0.229519	0.342	0.148	3.14813e-219
Swi5	7.51735e-223	0.298836	0.842	0.595	1.37876e-218
Selenow	7.96338e-223	0.251201	0.933	0.712	1.46056e-218
H2-Q10	5.75749e-222	0.200034	0.251	0.09	1.05598e-217
Gmppa	1.40774e-221	0.206047	0.332	0.139	2.58194e-217
Ifngr2	1.42647e-220	0.203458	0.368	0.162	2.61628e-216
Rpl7	2.34365e-220	0.297609	0.909	0.66	4.29848e-216
Sec61a1	4.42676e-219	0.215656	0.492	0.253	8.11912e-215
Rab2a	5.15699e-219	0.208783	0.848	0.547	9.45844e-215
Atraid	1.87956e-218	0.203469	0.758	0.467	3.4473e-214
Meg3	3.55714e-218	0.24023	0.672	0.396	6.52415e-214
Rpl19	7.73211e-218	0.278381	0.927	0.679	1.41815e-213
Uap1l1	8.41035e-218	0.239408	0.299	0.12	1.54254e-213
Ifi211	1.73878e-217	0.209547	0.317	0.13	3.1891e-213
Eef1b2	2.1198e-217	0.273159	0.85	0.586	3.88793e-213
Ephx2	1.52941e-216	0.205853	0.28	0.11	2.8051e-212
Gnl3	1.07993e-214	0.238012	0.41	0.196	1.98069e-210
Car13	1.47243e-214	0.230622	0.228	0.081	2.70058e-210
Map1lc3b	3.06255e-214	0.232817	0.849	0.572	5.61702e-210
Rhoc	6.87213e-211	0.22497	0.767	0.474	1.26042e-206
Dnajc25	7.401e-211	0.201735	0.431	0.21	1.35742e-206
Rpn2	2.86575e-208	0.234229	0.801	0.524	5.25607e-204
Eif3f	2.71664e-202	0.241717	0.86	0.604	4.98259e-198
Trim30a	1.28972e-201	0.201468	0.353	0.156	2.36547e-197
Psma4	3.01073e-201	0.207453	0.764	0.475	5.52199e-197
Sec13	3.25128e-200	0.202417	0.58	0.328	5.96317e-196
H2-T23	8.1295e-200	0.229978	0.675	0.402	1.49103e-195
Slc5a3	2.03245e-197	0.281861	0.222	0.082	3.72772e-193
Plod2	1.8894e-194	0.209383	0.272	0.111	3.46536e-190
Zbtb20	1.74385e-192	0.23193	0.907	0.662	3.1984e-188
Prdx1	5.29503e-192	0.355815	0.813	0.609	9.71161e-188
Myc	1.09211e-191	0.211882	0.329	0.148	2.00303e-187
Nedd4	1.5361e-191	0.231559	0.878	0.607	2.81736e-187
Fgfrl1	2.65457e-191	0.233053	0.201	0.071	4.86874e-187
Edf1	1.23517e-190	0.29435	0.793	0.564	2.26542e-186
Manf	1.09621e-189	0.327395	0.719	0.447	2.01056e-185
Nrep	2.11155e-189	0.304114	0.318	0.142	3.87279e-185
Psap	2.81946e-189	0.223283	0.88	0.652	5.17117e-185
Capns1	8.90465e-189	0.224958	0.844	0.584	1.6332e-184
Npm1	5.64081e-186	0.280929	0.807	0.59	1.03458e-181
Psmb2	1.22154e-185	0.223716	0.802	0.531	2.24042e-181
Plac8	2.4417e-185	0.761384	0.361	0.182	4.47833e-181
Cavin3	3.04554e-184	0.207665	0.869	0.591	5.58582e-180
Rps8	1.37763e-182	0.250312	0.898	0.632	2.52671e-178
Arxes2	2.58813e-180	0.224952	0.231	0.089	4.7469e-176
Adamts15	3.02388e-180	0.206316	0.21	0.077	5.5461e-176
Btf3	5.01689e-180	0.256328	0.859	0.618	9.20148e-176
Rps18	3.20712e-179	0.247002	0.909	0.67	5.88218e-175
Rps5	5.58243e-179	0.248874	0.942	0.696	1.02387e-174
Sult5a1	2.41171e-177	0.253927	0.405	0.207	4.42331e-173
Rpl27a	7.65376e-177	0.246798	0.938	0.718	1.40378e-172
Rpl23	5.9991e-176	0.207955	0.94	0.697	1.1003e-171
Sqstm1	9.65215e-176	0.235009	0.683	0.431	1.7703e-171
Gbp2	6.61392e-173	0.234224	0.412	0.209	1.21306e-168
Selenof	7.57392e-173	0.211608	0.9	0.669	1.38913e-168
Rpl28	3.23745e-165	0.245575	0.888	0.659	5.9378e-161
Arxes1	1.49724e-163	0.235133	0.202	0.077	2.74609e-159
Rpl23a	4.09625e-160	0.206863	0.947	0.722	7.51293e-156
Rpl14	1.82943e-157	0.219673	0.902	0.66	3.35535e-153
Rack1	1.02957e-154	0.212983	0.838	0.591	1.88834e-150
Rpl13a	5.45938e-153	0.230455	0.793	0.56	1.0013e-148
Creld2	1.07094e-152	0.24176	0.336	0.166	1.96422e-148
Igfbp4	3.40598e-148	0.233321	0.781	0.544	6.2469e-144
Ddit3	1.71461e-145	0.215264	0.395	0.211	3.14476e-141
Rpl37	4.59115e-140	0.208352	0.893	0.673	8.42064e-136
Rpl18	5.15594e-139	0.201982	0.885	0.65	9.45652e-135
Gpx4	7.51132e-135	0.203389	0.839	0.616	1.37765e-130
Tspo	1.18644e-134	0.240224	0.767	0.577	2.17606e-130
Naca	3.24903e-131	0.201838	0.861	0.64	5.95904e-127
Ly6a	1.37324e-124	0.216075	0.788	0.571	2.51867e-120
Anxa2	8.63301e-122	0.237782	0.762	0.567	1.58338e-117
Ifi27	3.87671e-118	0.236711	0.643	0.456	7.11028e-114
Eif5a	4.52077e-107	0.236334	0.728	0.549	8.29154e-103

## Sheet: VSMC
	p_val	avg_logFC	pct.1	pct.2	p_val_adj
Acta2	0	4.07663	0.52	0.074	0
Rgs5	0	3.93814	0.734	0.059	0
Tagln	0	3.64983	0.535	0.06	0
Myl9	0	3.50567	0.779	0.145	0
Tpm2	0	3.48887	0.778	0.119	0
Kcnj8	0	3.0049	0.494	0.016	0
Myh11	0	2.91046	0.477	0.015	0
Ppp1r14a	0	2.61997	0.833	0.073	0
Mylk	0	2.47799	0.592	0.06	0
Tpm1	0	2.42005	0.632	0.286	0
Art3	0	2.38977	0.592	0.084	0
Ndufa4l2	0	2.33559	0.829	0.229	0
Sncg	0	2.33369	0.456	0.078	0
Higd1b	0	2.30319	0.535	0.024	0
Mnd1	0	2.30067	0.526	0.057	0
Rgs4	0	2.23932	0.635	0.009	0
Mfge8	0	2.23391	0.886	0.424	0
Rasl11a	0	2.10642	0.635	0.054	0
Lmod1	0	2.10017	0.426	0.008	0
Notch3	0	2.09099	0.736	0.076	0
Abcc9	0	2.07765	0.454	0.024	0
Postn	0	2.05499	0.828	0.309	0
Cox4i2	0	1.92015	0.576	0.055	0
Gucy1a1	0	1.91542	0.647	0.043	0
Gucy1b1	0	1.75838	0.568	0.052	0
Olfr558	0	1.72841	0.424	0.003	0
2022-09-04	0	1.72191	0.611	0.206	0
Id4	0	1.70314	0.426	0.073	0
Pdgfrb	0	1.7024	0.696	0.259	0
Myo1b	0	1.67424	0.585	0.118	0
Gja4	0	1.6666	0.588	0.037	0
Heyl	0	1.63468	0.528	0.059	0
Flna	0	1.62464	0.531	0.26	0
Tsc22d1	0	1.61759	0.826	0.362	0
Csrp1	0	1.61678	0.58	0.271	0
Cald1	0	1.59791	0.918	0.596	0
Vtn	0	1.58294	0.464	0.116	0
Nrip2	0	1.57371	0.344	0.005	0
Pcp4l1	0	1.49006	0.319	0.007	0
Ppp1r12a	0	1.47987	0.637	0.292	0
Rasgrp2	0	1.47185	0.553	0.073	0
Pdgfa	0	1.44816	0.473	0.05	0
Mcam	0	1.44501	0.472	0.028	0
Itga1	0	1.43936	0.635	0.135	0
Cpe	0	1.43733	0.449	0.071	0
Agtr1a	0	1.40985	0.426	0.099	0
Vstm4	0	1.37944	0.382	0.058	0
Itga7	0	1.3734	0.398	0.02	0
Ngf	0	1.37265	0.39	0.025	0
Carmn	0	1.36474	0.364	0.034	0
Tinagl1	0	1.36188	0.749	0.135	0
Rasl12	0	1.35889	0.462	0.078	0
Oaz2	0	1.35085	0.731	0.366	0
Atp1b1	0	1.34935	0.26	0.025	0
Bcam	0	1.33059	0.534	0.081	0
Nostrin	0	1.32734	0.306	0.019	0
Btbd3	0	1.32254	0.432	0.07	0
Tbx5	0	1.32033	0.323	0.009	0
Ano1	0	1.31418	0.362	0.003	0
Dtx3	0	1.31331	0.456	0.13	0
Map3k20	0	1.30528	0.381	0.096	0
Gjc1	0	1.30386	0.471	0.12	0
Atp1b2	0	1.29255	0.387	0.019	0
Aspn	0	1.28633	0.845	0.446	0
Tnfrsf21	0	1.26056	0.315	0.042	0
Hopx	0	1.25566	0.319	0.015	0
Tbx2	0	1.22484	0.363	0.025	0
Ppp1r12b	0	1.20367	0.325	0.057	0
Cystm1	0	1.1996	0.393	0.088	0
Rbpms2	0	1.19921	0.314	0.03	0
Cog7	0	1.1938	0.364	0.069	0
Sorbs2	0	1.191	0.237	0.024	0
Uba2	0	1.18094	0.527	0.213	0
P2rx1	0	1.18083	0.25	0.005	0
Des	0	1.16303	0.34	0.046	0
Fbxl22	0	1.1627	0.227	0.012	0
S1pr3	0	1.15692	0.415	0.106	0
Cspg4	0	1.14824	0.336	0.03	0
F8a	0	1.14203	0.262	0.043	0
Ndrg2	0	1.1382	0.529	0.198	0
Foxs1	0	1.13553	0.31	0.034	0
Tns1	0	1.13479	0.641	0.285	0
Calm2	0	1.13411	0.775	0.578	0
Gng11	0	1.12599	0.788	0.425	0
Rasd1	0	1.12443	0.268	0.044	0
Ednrb	0	1.11835	0.271	0.038	0
Slc12a2	0	1.1179	0.255	0.03	0
Mamdc2	0	1.11457	0.296	0.008	0
Fam110a	0	1.11185	0.249	0.023	0
Serpini1	0	1.10645	0.287	0.007	0
Mef2c	0	1.10493	0.492	0.136	0
Pde10a	0	1.088	0.273	0.052	0
Fermt2	0	1.08602	0.731	0.504	0
Lbh	0	1.08263	0.328	0.085	0
Chn1	0	1.07964	0.301	0.044	0
Myl1	0	1.07103	0.223	0.024	0
Vasp	0	1.05831	0.557	0.277	0
Dapk2	0	1.05545	0.252	0.039	0
Inpp4b	0	1.0544	0.296	0.013	0
Kcnk3	0	1.03972	0.287	0.029	0
Malat1	0	1.03171	0.923	0.767	0
Synpo2	0	1.02791	0.232	0.018	0
Sorbs1	0	1.01709	0.357	0.085	0
Timp4	0	1.01471	0.499	0.104	0
Ccdc3	0	1.01348	0.32	0.048	0
Ajuba	0	1.01062	0.24	0.011	0
Arhgdib	0	1.00592	0.333	0.087	0
Pdlim3	0	0.996366	0.21	0.004	0
Pde3a	0	0.981758	0.337	0.098	0
Hoxb3os	0	0.98087	0.281	0.041	0
Arhgef17	0	0.979099	0.294	0.052	0
Bcar3	0	0.968803	0.266	0.03	0
Parm1	0	0.957786	0.257	0.017	0
Epas1	0	0.955512	0.533	0.185	0
Crim1	0	0.954282	0.353	0.069	0
Lgalsl	0	0.940727	0.342	0.087	0
Hrct1	0	0.940174	0.453	0.167	0
Tspan15	0	0.939442	0.296	0.064	0
Ednra	0	0.939071	0.266	0.038	0
Slc2a4	0	0.929442	0.262	0.036	0
Tspan12	0	0.920488	0.37	0.114	0
Casq2	0	0.911365	0.203	0.001	0
Hspb2	0	0.899595	0.246	0.024	0
Tnfaip8	0	0.899484	0.369	0.116	0
Nr2f2	0	0.898204	0.365	0.111	0
Wtip	0	0.884349	0.256	0.058	0
Gcnt2	0	0.876406	0.237	0.028	0
Esam	0	0.875136	0.617	0.144	0
Fry	0	0.874313	0.27	0.039	0
Igfbp7	0	0.872716	0.909	0.649	0
Nrarp	0	0.869253	0.273	0.031	0
Egflam	0	0.859123	0.21	0.016	0
Cbfa2t3	0	0.85513	0.344	0.096	0
Bcas3	0	0.852379	0.22	0.036	0
Sgip1	0	0.850232	0.219	0.014	0
Fam107b	0	0.848548	0.255	0.031	0
Mrvi1	0	0.837522	0.233	0.029	0
Tbc1d1	0	0.833008	0.26	0.045	0
Rnf152	0	0.831922	0.233	0.022	0
Cobll1	0	0.828848	0.234	0.024	0
Slc11a1	0	0.821847	0.201	0.03	0
Daam2	0	0.81923	0.217	0.013	0
Filip1	0	0.73616	0.228	0.04	0
Nes	0	0.699827	0.266	0.057	0
Mustn1	1.33656e-307	1.64395	0.41	0.153	2.45138e-303
Fam162a	4.9505e-307	1.13866	0.66	0.408	9.07971e-303
Ckb	5.66618e-300	1.20172	0.597	0.321	1.03923e-295
Dmd	1.62429e-296	0.719317	0.221	0.044	2.97911e-292
Col8a1	3.47502e-294	0.710552	0.246	0.052	6.37353e-290
Nexn	6.13314e-292	0.852523	0.21	0.041	1.12488e-287
Sparcl1	3.05231e-288	0.953793	0.807	0.535	5.59823e-284
Ift43	2.50427e-287	0.951346	0.451	0.191	4.59308e-283
Tm4sf1	1.4568e-285	0.478009	0.624	0.294	2.67192e-281
Fads3	5.05362e-282	0.90071	0.318	0.098	9.26885e-278
Rtn4rl1	3.32555e-279	0.91982	0.292	0.083	6.0994e-275
Rbpms	8.78841e-277	0.984737	0.585	0.334	1.61188e-272
Apold1	2.07349e-276	0.723608	0.287	0.073	3.80299e-272
Pacsin3	4.02068e-275	0.850637	0.226	0.051	7.37434e-271
Actn4	5.62258e-273	0.904601	0.567	0.308	1.03124e-268
Enpep	5.73146e-268	1.13715	0.436	0.192	1.05121e-263
2022-09-07	5.68349e-265	0.879024	0.783	0.615	1.04241e-260
Rcsd1	6.36809e-265	0.583283	0.208	0.042	1.16797e-260
Ldhb	4.67847e-260	1.16741	0.516	0.262	8.58079e-256
Steap4	2.21636e-257	1.3889	0.597	0.382	4.06502e-253
Myl6	1.61131e-256	1.47195	0.766	0.677	2.9553e-252
Phlda3	4.82402e-255	0.997414	0.492	0.245	8.84774e-251
Ptp4a3	8.25502e-253	1.1407	0.424	0.185	1.51405e-248
Map1lc3a	6.28846e-249	0.881928	0.721	0.509	1.15337e-244
Aoc3	6.28008e-242	1.02528	0.47	0.237	1.15183e-237
Rrad	3.46778e-239	1.02699	0.267	0.077	6.36026e-235
Actn1	2.68034e-235	0.937547	0.267	0.08	4.91602e-231
Jam3	3.04484e-229	0.941346	0.378	0.154	5.58454e-225
Syne2	8.49304e-227	0.774268	0.371	0.145	1.55771e-222
2010111I01Rik	3.11619e-219	0.753652	0.282	0.089	5.7154e-215
Mtus1	2.35516e-218	0.861196	0.301	0.104	4.31961e-214
Itgb1	1.36582e-213	0.78942	0.705	0.542	2.50506e-209
Hspb1	6.13665e-210	0.812722	0.647	0.406	1.12552e-205
Atp2a2	3.00074e-208	1.01476	0.451	0.241	5.50365e-204
Filip1l	5.85922e-207	1.07687	0.432	0.211	1.07464e-202
Jag1	3.2975e-206	0.691112	0.264	0.084	6.04795e-202
Mgst3	2.05335e-205	1.00338	0.422	0.208	3.76605e-201
Itpr1	1.44372e-203	0.770439	0.295	0.104	2.64792e-199
Alpl	2.32653e-201	0.899232	0.274	0.094	4.26709e-197
Vcl	5.50594e-201	0.83041	0.328	0.129	1.00984e-196
Zfp467	1.7947e-199	0.729458	0.282	0.097	3.29166e-195
Snrk	7.83948e-195	0.7281	0.538	0.311	1.43784e-190
Cnn2	7.09205e-194	0.670846	0.377	0.158	1.30075e-189
Serpine2	9.28837e-194	0.754847	0.579	0.349	1.70358e-189
Igfbp5	2.01151e-193	0.524553	0.655	0.375	3.6893e-189
Prkar1a	3.39628e-188	0.783191	0.631	0.462	6.22912e-184
Spry4	1.55164e-187	0.74467	0.216	0.063	2.84586e-183
Ech1	6.32105e-187	0.716933	0.697	0.514	1.15934e-182
Cyp4b1	4.47929e-186	0.716627	0.287	0.099	8.21547e-182
Tmem38b	1.00254e-184	0.693309	0.229	0.071	1.83876e-180
Dstn	5.4645e-184	1.6507	0.588	0.452	1.00224e-179
Adcy6	3.7324e-183	0.77594	0.262	0.092	6.8456e-179
Mgp	6.54534e-182	1.61869	0.428	0.218	1.20048e-177
Pfkp	1.09262e-181	1.12871	0.421	0.221	2.00397e-177
Sort1	4.35272e-180	0.660501	0.213	0.064	7.98332e-176
Pnpla2	1.46535e-179	0.88086	0.397	0.19	2.6876e-175
Adap2	2.12905e-178	0.766306	0.201	0.058	3.90489e-174
Dgkh	3.64516e-178	0.616446	0.209	0.06	6.68558e-174
Tcf15	1.77435e-176	0.220035	0.348	0.124	3.25434e-172
Dbp	4.2972e-176	0.699581	0.392	0.178	7.88149e-172
Pdzd2	1.22433e-173	1.07182	0.386	0.187	2.24555e-169
Ppp1r12c	4.35705e-172	0.686938	0.262	0.094	7.99127e-168
Lpp	5.72567e-170	0.930791	0.487	0.301	1.05015e-165
Palld	1.50529e-169	1.14115	0.355	0.172	2.76085e-165
Rhob	2.27633e-168	0.937184	0.58	0.396	4.17502e-164
Bzw2	8.91939e-167	0.929458	0.375	0.188	1.63591e-162
Fez2	2.23159e-164	0.669522	0.416	0.209	4.09296e-160
4930523C07Rik	2.81145e-163	0.703833	0.501	0.294	5.15649e-159
Pear1	4.84875e-161	0.706832	0.252	0.091	8.8931e-157
Unc45a	2.60621e-159	0.618419	0.217	0.071	4.78006e-155
Zfhx3	1.9649e-158	0.760032	0.38	0.193	3.60382e-154
Plce1	9.00394e-155	0.64452	0.244	0.086	1.65141e-150
Limd1	3.47058e-152	0.706616	0.362	0.178	6.36539e-148
Mast4	3.48573e-149	0.727088	0.409	0.218	6.39318e-145
Angptl2	3.07965e-148	1.34588	0.539	0.409	5.64838e-144
Gnb4	3.42517e-148	0.762138	0.382	0.196	6.2821e-144
Lims1	4.09661e-146	0.741263	0.515	0.339	7.51359e-142
Ate1	5.60204e-145	0.646359	0.278	0.114	1.02747e-140
Rock1	1.23139e-136	0.75485	0.48	0.311	2.25849e-132
Stom	1.04503e-134	0.56812	0.233	0.087	1.9167e-130
Ppp1cb	3.1199e-134	0.816372	0.493	0.337	5.72221e-130
Efhd2	1.84892e-132	0.693081	0.307	0.141	3.3911e-128
Asap2	1.96947e-132	0.669012	0.28	0.121	3.6122e-128
Cxcl12	4.79264e-129	0.899788	0.6	0.437	8.79018e-125
Hes1	1.98636e-128	0.681072	0.46	0.278	3.64319e-124
Crip1	2.70271e-128	1.42767	0.638	0.559	4.95704e-124
Igfbp3	7.6555e-127	1.15834	0.278	0.121	1.4041e-122
Ppp2r1a	3.77471e-126	0.731991	0.451	0.289	6.92319e-122
Epn2	8.58691e-125	0.646757	0.317	0.154	1.57492e-120
Inpp5a	8.60604e-125	0.577136	0.23	0.09	1.57843e-120
Cd151	1.35545e-124	0.617898	0.549	0.385	2.48603e-120
H3f3b	3.64234e-121	0.550894	0.761	0.67	6.68042e-117
Rab3a	1.02492e-120	0.615235	0.205	0.076	1.87981e-116
Atp5b	8.77135e-113	0.508474	0.683	0.541	1.60875e-108
Tprgl	1.36435e-112	0.550018	0.583	0.438	2.50235e-108
Mob2	5.8347e-112	0.681241	0.328	0.174	1.07014e-107
Ets1	1.36821e-110	0.540872	0.302	0.142	2.50943e-106
Atp2b4	1.86611e-110	0.57427	0.251	0.109	3.42264e-106
Actb	5.01606e-110	0.767303	0.449	0.264	9.19995e-106
Camk2g	1.03233e-109	0.580398	0.238	0.102	1.8934e-105
Il34	7.14304e-109	0.702026	0.233	0.1	1.3101e-104
Rsu1	1.11573e-108	0.637365	0.54	0.402	2.04637e-104
Phlda1	1.83176e-108	1.16381	0.532	0.409	3.35962e-104
Cdc42ep4	1.43768e-106	0.630077	0.25	0.113	2.63685e-102
Nr4a1	4.5129e-105	0.645472	0.384	0.218	8.27711e-101
Tspan3	8.96241e-105	0.608085	0.597	0.476	1.64379e-100
Id1	9.96497e-105	0.294423	0.449	0.26	1.82767e-100
Pbxip1	2.71509e-104	0.787923	0.392	0.246	4.97974e-100
Tln1	3.29434e-104	0.627122	0.465	0.321	6.04215e-100
Aldoa	9.87101e-104	0.52593	0.72	0.581	1.81044e-99
Crip2	9.11387e-103	0.459666	0.708	0.558	1.67158e-98
Mat2a	5.16325e-102	0.685073	0.609	0.49	9.46991e-98
Adgrf5	2.82776e-101	0.379147	0.288	0.128	5.18639e-97
Luzp1	1.24636e-99	0.568236	0.439	0.285	2.28594e-95
Atp5g3	3.17932e-98	0.604179	0.606	0.493	5.83119e-94
Ebf1	4.62868e-98	0.596398	0.733	0.632	8.48946e-94
Cd81	3.46634e-97	0.480803	0.805	0.714	6.35762e-93
Aplp2	3.06546e-96	0.406347	0.68	0.554	5.62235e-92
Cox8a	1.3489e-95	0.636585	0.672	0.578	2.47402e-91
Adcy3	2.26981e-95	0.627656	0.213	0.093	4.16305e-91
Btg1	5.19444e-95	0.534026	0.601	0.467	9.52712e-91
Ptms	1.40026e-93	0.564788	0.65	0.555	2.56821e-89
Suclg1	6.52487e-93	0.564798	0.504	0.363	1.19673e-88
Hspa1a	7.72027e-93	0.650366	0.412	0.248	1.41597e-88
Meg3	8.67124e-93	0.97415	0.558	0.436	1.59039e-88
Nr1h3	4.17088e-92	0.962106	0.338	0.213	7.64981e-88
Pkig	2.66091e-90	0.677702	0.409	0.277	4.88038e-86
Ass1	2.37692e-89	0.777076	0.239	0.115	4.35951e-85
Pde4b	8.29431e-88	0.54464	0.223	0.102	1.52126e-83
Gpx8	1.35749e-86	0.935748	0.617	0.518	2.48976e-82
Nab1	5.4807e-86	0.566248	0.271	0.143	1.00522e-81
Pdlim1	1.33929e-85	0.602786	0.334	0.194	2.45639e-81
Laptm4b	7.65429e-84	0.548245	0.215	0.098	1.40387e-79
Mprip	1.83882e-83	0.614888	0.453	0.33	3.37259e-79
Hoxb2	2.83389e-83	0.603829	0.246	0.125	5.19763e-79
Fosb	3.12456e-83	0.789574	0.581	0.48	5.73075e-79
Gpsm3	5.50765e-82	0.72103	0.333	0.205	1.01016e-77
Tgfb1i1	2.9609e-81	0.568223	0.343	0.21	5.43059e-77
Airn	3.4783e-79	0.588277	0.215	0.102	6.37954e-75
Myadm	7.08718e-79	0.590257	0.478	0.357	1.29986e-74
Tob2	2.43921e-78	0.589917	0.376	0.247	4.47375e-74
Btg2	9.80734e-78	0.643159	0.655	0.579	1.79876e-73
Ywhaq	4.567e-77	0.4662	0.654	0.568	8.37634e-73
Atpif1	1.73188e-76	0.560243	0.612	0.504	3.17644e-72
Marveld1	9.70176e-74	0.581314	0.261	0.144	1.7794e-69
Fos	1.27084e-72	0.704181	0.668	0.634	2.33086e-68
Coq10b	1.78444e-72	0.515087	0.33	0.202	3.27285e-68
Plcb4	4.52679e-72	0.425346	0.278	0.15	8.30258e-68
Pten	4.03428e-71	0.598477	0.428	0.314	7.39927e-67
Selenow	2.6786e-70	0.555318	0.765	0.752	4.91281e-66
Errfi1	3.42797e-69	0.585067	0.441	0.315	6.28724e-65
Arhgef25	4.57763e-69	0.569523	0.252	0.14	8.39584e-65
Mef2a	3.0835e-68	0.493769	0.319	0.193	5.65545e-64
Txnip	4.85639e-68	0.425328	0.623	0.511	8.90711e-64
Mdh1	5.96498e-67	0.41665	0.535	0.416	1.09404e-62
Ubr1	6.34257e-67	0.534769	0.208	0.104	1.16329e-62
Ntf3	7.7566e-67	0.509677	0.262	0.146	1.42264e-62
Csnk1e	2.52449e-66	0.607521	0.301	0.186	4.63017e-62
Crispld2	4.9564e-66	0.379816	0.337	0.203	9.09054e-62
Fam174a	8.62788e-66	0.61829	0.367	0.252	1.58244e-61
Klf9	5.39783e-65	0.405327	0.672	0.584	9.90016e-61
BC028528	1.52861e-64	0.420938	0.222	0.113	2.80362e-60
Plekhg2	2.38522e-64	0.481094	0.214	0.11	4.37474e-60
Cygb	4.44815e-64	0.83125	0.537	0.468	8.15835e-60
Gm26802	9.9375e-64	0.678106	0.336	0.22	1.82264e-59
Gas1	1.01642e-63	0.993977	0.452	0.357	1.86421e-59
Dhrs3	2.01493e-63	0.359562	0.291	0.17	3.69558e-59
Emp2	1.32433e-62	0.493927	0.292	0.176	2.42896e-58
Zc2hc1a	2.06363e-62	0.478086	0.227	0.122	3.78491e-58
Nbeal1	1.97482e-61	0.508554	0.356	0.238	3.62201e-57
Pls3	4.59343e-61	0.410032	0.354	0.232	8.42481e-57
Smpdl3a	1.50404e-60	0.606006	0.43	0.326	2.75856e-56
Pparg	2.57555e-60	0.489063	0.391	0.276	4.72381e-56
Cers4	7.38588e-60	0.404454	0.209	0.106	1.35464e-55
Notch1	1.39473e-59	0.467811	0.237	0.131	2.55808e-55
Pon2	2.70218e-59	0.604528	0.362	0.258	4.95607e-55
Eps8	8.07504e-59	0.681302	0.264	0.162	1.48104e-54
Pdcd10	1.63017e-58	0.527084	0.385	0.279	2.9899e-54
Gamt	1.09495e-57	0.515682	0.249	0.146	2.00825e-53
Dab2ip	4.75589e-56	0.413834	0.228	0.125	8.72278e-52
Tubb4b	9.32427e-56	0.393001	0.532	0.417	1.71016e-51
Esyt1	1.30123e-55	0.499282	0.3	0.192	2.38659e-51
mt-Nd4	1.79546e-55	0.811373	0.203	0.105	3.29305e-51
Slmap	7.2441e-55	0.53658	0.257	0.158	1.32864e-50
Rbm39	3.33871e-54	0.358349	0.749	0.714	6.12353e-50
Camk1	6.44096e-54	0.508504	0.44	0.35	1.18134e-49
Dnajb4	1.8052e-53	0.511402	0.23	0.133	3.31091e-49
Ehd4	4.05362e-53	0.214091	0.211	0.112	7.43474e-49
B230219D22Rik	2.25925e-52	0.498338	0.369	0.269	4.14369e-48
Atp5a1	2.50364e-52	0.37052	0.586	0.482	4.59193e-48
Dynll1	2.81687e-52	0.441712	0.705	0.666	5.16642e-48
Pacsin2	4.41698e-52	0.468605	0.231	0.134	8.10118e-48
Ndufs2	2.68126e-51	0.46267	0.488	0.399	4.9177e-47
1110059E24Rik	7.40396e-51	0.467719	0.223	0.129	1.35796e-46
Sult1a1	2.32199e-50	0.455699	0.277	0.171	4.25875e-46
Dusp1	3.77759e-50	0.54419	0.61	0.521	6.92847e-46
Slc38a2	4.94913e-49	0.547356	0.489	0.408	9.07721e-45
Slc25a5	3.2407e-48	0.286847	0.597	0.482	5.94376e-44
Lamb2	8.02789e-48	0.440149	0.338	0.233	1.4724e-43
Ktn1	1.16914e-47	0.489626	0.302	0.203	2.14432e-43
Il15ra	9.65783e-47	0.545165	0.216	0.129	1.77134e-42
Cited2	1.70329e-46	0.612017	0.386	0.295	3.124e-42
Ccdc107	5.24029e-46	0.540712	0.258	0.169	9.61122e-42
Pck2	4.30474e-45	0.570609	0.292	0.204	7.89531e-41
Idh3g	5.38314e-45	0.43737	0.409	0.323	9.87322e-41
Emd	8.81408e-45	0.492634	0.298	0.207	1.61659e-40
Pttg1	1.44811e-44	0.436527	0.404	0.319	2.65598e-40
Msn	1.53352e-44	0.420387	0.461	0.377	2.81263e-40
Idh2	1.63874e-44	0.508413	0.422	0.34	3.00562e-40
Crtc3	3.22051e-44	0.454281	0.239	0.148	5.90674e-40
Mapre2	5.51444e-44	0.447865	0.25	0.159	1.0114e-39
Tmod3	6.96694e-42	0.434462	0.358	0.266	1.27781e-37
Slc25a4	3.4431e-41	0.411018	0.69	0.646	6.31498e-37
Rock2	4.44413e-41	0.441329	0.43	0.352	8.15098e-37
Id3	8.5059e-41	0.420512	0.614	0.54	1.56007e-36
Cryab	1.33445e-40	0.368783	0.386	0.311	2.44751e-36
Utrn	1.3516e-40	0.350372	0.341	0.243	2.47898e-36
Pik3ca	1.7621e-40	0.475416	0.242	0.157	3.23186e-36
Prex2	5.19255e-40	0.31945	0.213	0.123	9.52365e-36
Sdhc	1.82093e-39	0.492279	0.403	0.332	3.33977e-35
Nsmce4a	2.23158e-39	0.453269	0.359	0.275	4.09293e-35
Ctnna1	4.22101e-39	0.324566	0.375	0.283	7.74175e-35
Frmd4a	4.47337e-39	0.435109	0.224	0.14	8.20461e-35
Snx18	6.58915e-39	0.442515	0.292	0.205	1.20852e-34
Sipa1	7.80391e-39	0.508628	0.235	0.152	1.43132e-34
Serinc3	1.32652e-38	0.257765	0.557	0.481	2.43298e-34
Hoxb4	2.07547e-38	0.476313	0.233	0.152	3.80661e-34
Dnajc8	3.66605e-38	0.437392	0.465	0.402	6.7239e-34
Son	1.73409e-37	0.425615	0.591	0.559	3.18049e-33
Gipc1	8.35979e-37	0.458458	0.253	0.175	1.53327e-32
Lrrfip1	1.22525e-36	0.417549	0.255	0.172	2.24724e-32
Eif4a2	1.7874e-36	0.378786	0.569	0.513	3.27828e-32
Pid1	1.64456e-34	0.411846	0.221	0.14	3.01629e-30
4931406P16Rik	2.63843e-34	0.388946	0.216	0.137	4.83915e-30
Mid1ip1	6.21031e-34	0.36256	0.205	0.128	1.13903e-29
Hoxc4	6.92597e-34	0.571313	0.221	0.15	1.27029e-29
Myh9	1.35941e-33	0.414097	0.261	0.18	2.49329e-29
Wdr1	3.17045e-33	0.489862	0.343	0.275	5.81492e-29
Dpysl2	7.24001e-33	0.642665	0.346	0.28	1.32789e-28
Sf3b1	2.07776e-32	0.377433	0.544	0.509	3.81083e-28
Tcp11l2	8.70684e-32	0.453791	0.254	0.177	1.59692e-27
2022-09-11	9.05648e-32	0.444447	0.376	0.309	1.66105e-27
Kif5b	1.34892e-31	0.37877	0.542	0.514	2.47405e-27
Raph1	1.79115e-31	0.581132	0.253	0.182	3.28515e-27
Smim12	4.14793e-31	0.411985	0.232	0.159	7.60773e-27
Ralb	4.17314e-31	0.493868	0.254	0.183	7.65396e-27
Csrp2	7.59979e-31	0.555716	0.41	0.356	1.39388e-26
Eva1b	1.31608e-30	0.501451	0.502	0.461	2.41382e-26
Hif1a	1.49529e-30	0.405723	0.234	0.161	2.74251e-26
Tpi1	2.42597e-30	0.322188	0.501	0.425	4.44947e-26
Timp3	5.4926e-30	0.367568	0.599	0.533	1.0074e-25
Tgfb1	6.07658e-30	0.321874	0.214	0.138	1.11451e-25
Herc1	7.2863e-30	0.46387	0.231	0.159	1.33638e-25
Rap1a	2.53676e-29	0.3678	0.535	0.506	4.65267e-25
Ndufs7	3.21808e-29	0.306999	0.539	0.475	5.90228e-25
Ubc	4.45587e-29	0.438818	0.598	0.567	8.17252e-25
Chd6	1.8001e-28	0.394706	0.24	0.169	3.30157e-24
Map2k1	2.62907e-28	0.470862	0.245	0.178	4.82198e-24
Igf2r	4.90476e-28	0.484222	0.277	0.21	8.99583e-24
S100a1	1.02099e-27	0.348923	0.506	0.449	1.8726e-23
Purb	2.32495e-27	0.402826	0.286	0.218	4.26418e-23
Pja2	4.00901e-27	0.37167	0.26	0.191	7.35293e-23
Uqcrb	4.72815e-27	0.285047	0.612	0.567	8.67191e-23
Iscu	1.57809e-26	0.363034	0.478	0.442	2.89438e-22
Clstn1	1.84395e-26	0.386852	0.252	0.182	3.38199e-22
Rsbn1l	4.28399e-26	0.401042	0.283	0.215	7.85726e-22
Fzd4	6.56227e-26	0.423188	0.294	0.229	1.20359e-21
Dlc1	1.42944e-25	0.406884	0.439	0.39	2.62173e-21
Aig1	3.8559e-25	0.33799	0.257	0.186	7.07211e-21
Hadhb	5.84783e-25	0.355934	0.359	0.299	1.07255e-20
Ubb	9.04515e-25	0.302975	0.686	0.703	1.65897e-20
Pdcl3	1.07321e-24	0.358155	0.371	0.314	1.96837e-20
Fxyd1	1.1909e-24	0.333367	0.576	0.547	2.18423e-20
Slc25a3	2.78758e-24	0.258197	0.656	0.601	5.11271e-20
Cox7a2	4.27827e-24	0.308111	0.577	0.53	7.84678e-20
Adamts1	4.32559e-24	0.578339	0.43	0.391	7.93357e-20
Srrm2	4.65211e-24	0.344577	0.617	0.594	8.53244e-20
Rras	5.52478e-24	0.361635	0.41	0.362	1.0133e-19
Ddx5	1.49164e-23	0.265921	0.667	0.661	2.73582e-19
Cuedc1	7.89671e-23	0.338326	0.209	0.145	1.44834e-18
Hnrnpk	2.78888e-22	0.309306	0.668	0.628	5.11509e-18
Hnrnpl	2.90791e-22	0.389856	0.291	0.234	5.3334e-18
Dag1	4.28244e-22	0.386806	0.427	0.392	7.85443e-18
Gdi1	4.90298e-22	0.295979	0.218	0.156	8.99255e-18
Apbb2	1.55202e-21	0.263559	0.233	0.167	2.84657e-17
Ncor1	6.33988e-21	0.329199	0.531	0.519	1.1628e-16
Uqcr11	7.99269e-21	0.282398	0.546	0.491	1.46594e-16
Fus	1.13673e-20	0.312068	0.629	0.624	2.08488e-16
Nedd4	2.21781e-20	0.25817	0.682	0.654	4.06768e-16
Pnisr	2.43945e-20	0.405876	0.365	0.32	4.47419e-16
Mbnl2	4.0852e-20	0.320743	0.449	0.417	7.49266e-16
Dctn6	4.9524e-20	0.350997	0.266	0.21	9.08319e-16
Mob4	7.64618e-20	0.34579	0.283	0.229	1.40239e-15
Ppp1r15a	7.9194e-20	0.437864	0.465	0.435	1.4525e-15
Map1b	8.5782e-20	0.491914	0.278	0.226	1.57333e-15
Zfand5	1.36552e-19	0.331685	0.474	0.451	2.50449e-15
Vdac2	1.6481e-19	0.293793	0.5	0.463	3.02277e-15
Ndufb7	1.79039e-19	0.312473	0.511	0.483	3.28375e-15
Nr1d1	1.92458e-19	0.315269	0.218	0.159	3.52987e-15
Oxct1	2.49912e-19	0.413584	0.361	0.324	4.58363e-15
Ndufs5	6.75736e-19	0.279924	0.549	0.507	1.23937e-14
Blvra	6.96455e-19	0.41641	0.234	0.184	1.27737e-14
Cfap20	3.17719e-18	0.466733	0.273	0.229	5.82728e-14
Lhfp	7.94999e-18	0.341527	0.393	0.347	1.45811e-13
Cdkn2d	9.32844e-18	0.313732	0.22	0.166	1.71093e-13
Tns2	1.01199e-17	0.296369	0.257	0.202	1.85609e-13
Tnfaip1	1.05092e-17	0.340161	0.242	0.188	1.92749e-13
Ehd1	1.4759e-17	0.281656	0.364	0.319	2.70695e-13
Elovl5	2.29398e-17	0.257028	0.214	0.158	4.20738e-13
Adgre5	2.43816e-17	0.314155	0.222	0.17	4.47182e-13
Rab11b	3.85834e-17	0.316632	0.429	0.404	7.07659e-13
Cisd3	5.06128e-17	0.38959	0.24	0.195	9.28289e-13
Ndufa5	5.1864e-17	0.326202	0.456	0.433	9.51238e-13
Dynlt3	6.79159e-17	0.29593	0.32	0.272	1.24565e-12
Gsk3b	7.78268e-17	0.356721	0.343	0.302	1.42742e-12
Msrb1	1.30451e-16	0.461457	0.323	0.293	2.3926e-12
Hebp1	1.57518e-16	0.385055	0.27	0.228	2.88905e-12
Uqcr10	2.26898e-16	0.270377	0.523	0.485	4.16154e-12
Csnk1a1	3.1088e-16	0.305117	0.534	0.533	5.70186e-12
Thap3	4.16358e-16	0.34358	0.212	0.163	7.63642e-12
Borcs7	4.54003e-16	0.416904	0.221	0.177	8.32687e-12
Tmem109	4.89046e-16	0.325071	0.313	0.27	8.9696e-12
Nudt4	5.02731e-16	0.40405	0.311	0.273	9.22059e-12
Rcn2	6.02962e-16	0.373493	0.405	0.383	1.10589e-11
Tuba1a	6.26804e-16	0.362744	0.626	0.6	1.14962e-11
Rheb	7.68381e-16	0.278034	0.543	0.54	1.40929e-11
Rsrc2	1.27855e-15	0.349135	0.41	0.385	2.34499e-11
Tax1bp1	1.29877e-15	0.288889	0.528	0.523	2.38208e-11
Acadm	1.76515e-15	0.311323	0.339	0.3	3.23745e-11
Pkm	1.97855e-15	0.27687	0.519	0.496	3.62887e-11
Sdha	2.53511e-15	0.344741	0.402	0.373	4.64964e-11
Serinc1	8.62061e-15	0.324097	0.469	0.457	1.58111e-10
Pnkd	1.04766e-14	0.303112	0.338	0.303	1.92151e-10
Cox6a1	1.06525e-14	0.275179	0.635	0.625	1.95377e-10
Uqcrc2	1.53385e-14	0.240595	0.41	0.368	2.81323e-10
Kmt2e	1.76485e-14	0.289569	0.412	0.383	3.23691e-10
Syf2	1.89808e-14	0.276584	0.378	0.343	3.48128e-10
Srsf5	2.44782e-14	0.242879	0.525	0.502	4.48955e-10
Jun	3.87576e-14	0.457976	0.607	0.627	7.10854e-10
Cirbp	5.58777e-14	0.253479	0.289	0.24	1.02485e-09
Hcfc1r1	5.69768e-14	0.403229	0.452	0.451	1.04501e-09
Mcur1	5.89925e-14	0.391988	0.215	0.175	1.08198e-09
Rab14	7.68114e-14	0.317478	0.52	0.52	1.4088e-09
Zeb1	1.30177e-13	0.322327	0.308	0.266	2.38757e-09
Pold4	2.49883e-13	0.37101	0.25	0.211	4.5831e-09
Arhgap5	4.10792e-13	0.291293	0.295	0.255	7.53434e-09
Macf1	4.35924e-13	0.316782	0.35	0.32	7.99527e-09
Mlf2	1.10481e-12	0.306685	0.449	0.442	2.02633e-08
Uqcrc1	1.36462e-12	0.248236	0.451	0.422	2.50286e-08
Celf1	1.42038e-12	0.325123	0.235	0.195	2.60512e-08
Ppp2r5a	2.21317e-12	0.269194	0.267	0.226	4.05918e-08
Lrrc58	2.88935e-12	0.35574	0.361	0.339	5.29935e-08
Ndufa12	3.08117e-12	0.262533	0.456	0.426	5.65117e-08
Clk1	3.34559e-12	0.279283	0.334	0.3	6.13615e-08
Esyt2	4.14973e-12	0.289121	0.239	0.198	7.61102e-08
Vamp5	4.83963e-12	0.27841	0.209	0.166	8.87637e-08
Dst	6.0138e-12	0.241882	0.276	0.233	1.10299e-07
Maf1	7.32737e-12	0.251401	0.297	0.26	1.34391e-07
Parva	1.11448e-11	0.325939	0.246	0.21	2.04407e-07
Brd3	1.18149e-11	0.38856	0.239	0.205	2.16697e-07
Pgrmc1	1.6388e-11	0.298257	0.395	0.377	3.00573e-07
mt-Nd5	2.08303e-11	0.210566	0.214	0.166	3.82049e-07
Sh3bgrl	2.17196e-11	0.43462	0.382	0.375	3.98359e-07
Gnaq	2.58043e-11	0.310957	0.204	0.165	4.73276e-07
Ssbp2	3.18824e-11	0.294498	0.265	0.229	5.84755e-07
Ecm2	3.85792e-11	0.321436	0.338	0.306	7.07582e-07
Ehd2	4.40213e-11	0.247867	0.379	0.358	8.07394e-07
Lzts2	5.46914e-11	0.281836	0.296	0.263	1.0031e-06
Ypel3	5.78321e-11	0.263159	0.535	0.516	1.0607e-06
Ndufa11	8.28674e-11	0.266323	0.488	0.479	1.51987e-06
Tsc22d4	1.50558e-10	0.293397	0.228	0.192	2.76139e-06
Fmc1	1.63705e-10	0.325657	0.305	0.28	3.00251e-06
Acaa2	1.69262e-10	0.276716	0.405	0.391	3.10443e-06
Selenof	1.72955e-10	0.261107	0.698	0.713	3.17216e-06
Bnip2	1.73099e-10	0.254837	0.333	0.31	3.17481e-06
Wbp2	1.74053e-10	0.258835	0.201	0.163	3.19231e-06
Morf4l1	2.1554e-10	0.241851	0.692	0.703	3.95323e-06
Eif4ebp2	2.26342e-10	0.281969	0.21	0.175	4.15133e-06
Eif1b	2.51039e-10	0.320218	0.376	0.366	4.6043e-06
Nptn	3.10569e-10	0.26885	0.421	0.414	5.69614e-06
Map7d1	4.51038e-10	0.242867	0.255	0.22	8.27249e-06
Snrnp70	4.51947e-10	0.321415	0.432	0.431	8.28916e-06
Ndufs8	4.97093e-10	0.260925	0.37	0.354	9.11718e-06
Fam76a	6.14695e-10	0.270452	0.244	0.21	1.12741e-05
Ppp2r2a	6.55107e-10	0.276959	0.274	0.245	1.20153e-05
Ndufb6	8.11459e-10	0.222223	0.476	0.462	1.4883e-05
Ndufb8	1.04056e-09	0.217349	0.488	0.481	1.90849e-05
Tspan4	1.06448e-09	0.294137	0.346	0.327	1.95235e-05
Atf3	1.3119e-09	0.530063	0.366	0.352	2.40616e-05
Cyr61	1.52702e-09	0.326838	0.387	0.355	2.80071e-05
Klhl24	1.75015e-09	0.237733	0.266	0.23	3.20995e-05
Gna11	2.09707e-09	0.2364	0.326	0.301	3.84624e-05
Zfp644	2.11789e-09	0.269674	0.233	0.199	3.88443e-05
Aco2	2.38652e-09	0.214561	0.302	0.27	4.37711e-05
Smc1a	3.26682e-09	0.26454	0.393	0.383	5.99167e-05
Sh3glb2	4.27347e-09	0.327725	0.242	0.214	7.83798e-05
Sucla2	4.47836e-09	0.264487	0.273	0.246	8.21375e-05
Rnf11	5.04667e-09	0.286001	0.251	0.224	9.25609e-05
Col18a1	9.91617e-09	0.295614	0.289	0.264	0.000181872
Arhgap10	1.34987e-08	0.254153	0.206	0.173	0.000247579
Vasn	1.57402e-08	0.211514	0.216	0.182	0.000288691
Cldn15	2.0665e-08	0.296059	0.243	0.213	0.000379017
Vdac1	3.52276e-08	0.285926	0.354	0.34	0.000646109
Nemf	4.08223e-08	0.29271	0.215	0.186	0.000748722
Cbx6	4.6127e-08	0.257941	0.241	0.213	0.000846015
Iqgap1	4.80928e-08	0.26903	0.345	0.331	0.000882069
Anxa6	4.87314e-08	0.286831	0.362	0.36	0.000893783
Ywhaz	6.05233e-08	0.261248	0.346	0.336	0.00111006
Gpi1	6.9972e-08	0.272147	0.401	0.396	0.00128336
Fbxw2	1.02061e-07	0.262375	0.288	0.266	0.0018719
Ndfip2	1.47261e-07	0.227706	0.221	0.193	0.00270091
Gabarapl2	1.95933e-07	0.226358	0.502	0.518	0.00359361
Hmox2	2.11823e-07	0.33422	0.237	0.218	0.00388504
Hnrnph2	2.64169e-07	0.282236	0.239	0.216	0.00484512
Vps28	5.08854e-07	0.231246	0.394	0.394	0.00933289
2022-09-08	5.53999e-07	0.327214	0.314	0.304	0.0101609
Pdha1	6.15942e-07	0.293521	0.295	0.283	0.011297
Arid4a	6.37377e-07	0.287261	0.206	0.181	0.0116901
Bclaf1	6.75195e-07	0.29363	0.35	0.347	0.0123838
Tnfrsf1a	7.79694e-07	0.290184	0.433	0.444	0.0143004
Rsrp1	8.41701e-07	0.226756	0.545	0.538	0.0154376
Cox6c	1.09343e-06	0.264439	0.611	0.634	0.0200546
Ywhab	1.19386e-06	0.24335	0.486	0.502	0.0218967
Raly	1.76403e-06	0.247848	0.39	0.394	0.0323542
Mkln1	1.91858e-06	0.270405	0.246	0.225	0.0351886
Nipbl	1.99773e-06	0.258682	0.312	0.301	0.0366404
Chd3	3.13504e-06	0.204641	0.225	0.199	0.0574998
Srrm1	3.28535e-06	0.246367	0.407	0.408	0.0602566
Ankrd12	3.33981e-06	0.212613	0.297	0.277	0.0612554
Vamp8	3.39393e-06	0.210803	0.384	0.379	0.0622482
Top2b	3.98607e-06	0.273897	0.262	0.248	0.0731086
Psma1	4.65363e-06	0.212971	0.443	0.443	0.0853522
Phip	4.91515e-06	0.303978	0.265	0.249	0.0901488
Vezf1	7.26469e-06	0.236314	0.231	0.21	0.133242
Cldnd1	8.93876e-06	0.268541	0.282	0.269	0.163946
Atrx	1.04282e-05	0.234639	0.416	0.424	0.191264
Bmpr2	1.5421e-05	0.201017	0.203	0.179	0.282836
Vbp1	1.82857e-05	0.281252	0.219	0.203	0.335378
Rbms3	2.62235e-05	0.241879	0.219	0.199	0.480966
Eif4e3	3.00274e-05	0.293181	0.234	0.22	0.550732
Cavin1	3.0194e-05	0.378089	0.477	0.542	0.553788
Ddx3y	3.20476e-05	0.271759	0.276	0.263	0.587785
Cfl2	3.45897e-05	0.256064	0.278	0.27	0.63441
Zeb2	4.1579e-05	0.307757	0.402	0.414	0.7626
Prmt1	5.58878e-05	0.228543	0.328	0.32	1
Prpf4b	6.58586e-05	0.277753	0.234	0.219	1
Arid4b	6.77011e-05	0.231911	0.248	0.232	1
Lmbrd1	7.00131e-05	0.241904	0.201	0.182	1
Krit1	7.95459e-05	0.2709	0.243	0.229	1
Ndufb2	9.77743e-05	0.260152	0.355	0.357	1
Cyp20a1	0.000140572	0.314999	0.236	0.227	1
Ndufs3	0.000148242	0.217242	0.418	0.428	1
Tra2a	0.000158802	0.252615	0.302	0.298	1
Cyth3	0.000171333	0.276729	0.229	0.216	1
Laptm4a	0.00018411	0.228345	0.72	0.76	1
Ube3a	0.000219256	0.272834	0.344	0.354	1
Zfp36	0.000235308	0.219461	0.397	0.393	1
Rrp1	0.000300948	0.228903	0.312	0.315	1
Ilk	0.000311509	0.261919	0.381	0.394	1
Hadha	0.000430035	0.247393	0.266	0.264	1
Polr2c	0.000471653	0.219722	0.318	0.323	1
Arid1a	0.000519584	0.26026	0.222	0.212	1
Atp1a2	0.000535138	0.296503	0.212	0.201	1
Coro1b	0.000535809	0.372256	0.293	0.303	1
Ostf1	0.00056136	0.286827	0.442	0.473	1
Pop5	0.000561988	0.207624	0.258	0.25	1
Hagh	0.000658615	0.299494	0.245	0.242	1
Prpf38b	0.000938048	0.244687	0.258	0.256	1
Strn3	0.0010611	0.221785	0.257	0.251	1
Ube2d2a	0.00112824	0.206571	0.428	0.452	1
Bod1l	0.00120062	0.243461	0.298	0.3	1
Pbx1	0.00135632	0.230091	0.252	0.244	1
Ndufv1	0.0014215	0.219734	0.314	0.319	1
Josd2	0.00148104	0.298345	0.251	0.252	1
Psma6	0.00175934	0.203833	0.417	0.435	1
Kif1b	0.0018607	0.20439	0.249	0.241	1
Rbm42	0.00191943	0.223104	0.267	0.266	1
Wls	0.00208494	0.25574	0.272	0.273	1
Ash1l	0.0022589	0.207961	0.297	0.299	1
Mrps6	0.00309941	0.283007	0.216	0.212	1
Ddx39b	0.00326054	0.235224	0.335	0.343	1
Ankrd11	0.00335782	0.224813	0.375	0.395	1
Ssu72	0.0034374	0.203879	0.356	0.37	1
Esf1	0.00349493	0.23791	0.21	0.203	1
Rassf1	0.00473173	0.206736	0.254	0.248	1
Pcm1	0.00568542	0.233626	0.203	0.196	1
Chrac1	0.00661479	0.236612	0.281	0.287	1
Luc7l2	0.00685397	0.218475	0.46	0.494	1
Gapdh	0.0073584	0.213004	0.396	0.412	1
Vapa	0.00822352	0.204495	0.403	0.431	1
Gatad2b	0.00843306	0.235858	0.215	0.21	1
Zbtb7a	0.0087165	0.224186	0.312	0.32	1
Mier1	0.0136669	0.222182	0.255	0.256	1
Tcn2	0.0136986	0.218563	0.287	0.29	1
Rab18	0.0137534	0.209706	0.366	0.391	1
Actr10	0.014666	0.209195	0.249	0.252	1
Setd5	0.0162129	0.21105	0.236	0.236	1
Ik	0.0164654	0.20346	0.245	0.248	1
Ssbp4	0.0165876	0.228296	0.241	0.243	1
Rbms1	0.0167441	0.201018	0.534	0.575	1
Hnrnpr	0.0177983	0.244415	0.311	0.327	1
Mtfr1l	0.0185577	0.283356	0.243	0.25	1
Tnrc6c	0.0188657	0.203578	0.246	0.246	1
Dync1i2	0.0190324	0.214278	0.216	0.214	1
Hook3	0.0195603	0.204971	0.28	0.284	1
Idh3b	0.0225358	0.203977	0.291	0.3	1
Tra2b	0.0246293	0.230255	0.403	0.435	1
Tnfsf12	0.0445358	0.241422	0.242	0.245	1
Pcdh19	0.048273	0.26342	0.224	0.228	1
Hp1bp3	0.0579401	0.206743	0.321	0.342	1
Lsm8	0.0692522	0.210633	0.25	0.259	1
Nktr	0.0967834	0.203355	0.349	0.375	1
Aamp	0.100277	0.225892	0.329	0.36	1
Sgce	0.110473	0.224436	0.34	0.362	1
Blmh	0.113243	0.221889	0.212	0.218	1
Cdk12	0.117553	0.215496	0.21	0.216	1
Ccnl2	0.119143	0.205139	0.282	0.297	1
Acly	0.143384	0.226178	0.223	0.231	1
Fh1	0.148742	0.208066	0.213	0.22	1
Srek1	0.176941	0.246473	0.209	0.217	1
Armcx3	0.205286	0.246783	0.214	0.224	1
Nbdy	0.207979	0.227075	0.267	0.284	1
Tpgs1	0.236168	0.210311	0.218	0.229	1
Smc3	0.240954	0.203751	0.307	0.334	1
Tcf7l2	0.271675	0.272187	0.217	0.228	1
Gtf2a2	0.27716	0.201509	0.342	0.372	1
Ilf2	0.28177	0.217012	0.222	0.234	1
Eif4a3	0.293665	0.21178	0.215	0.227	1
Ube2v2	0.324641	0.219879	0.224	0.239	1
Rbm4b	0.327322	0.234006	0.21	0.221	1
Serpine1	0.36752	0.293349	0.203	0.225	1
Diablo	0.441297	0.239808	0.201	0.215	1
Cpne3	0.509527	0.203457	0.264	0.288	1
Bub3	0.510291	0.218363	0.274	0.299	1
Glo1	0.617244	0.224288	0.271	0.31	1
Ccnd2	0.627102	0.272562	0.417	0.479	1
Yipf4	0.650375	0.213782	0.323	0.363	1
Cavin3	0.77469	0.232267	0.555	0.651	1
M6pr	0.792302	0.21358	0.223	0.245	1
Tnxb	0.990635	0.231226	0.392	0.434	1

## Sheet: VEC
	p_val	avg_logFC	pct.1	pct.2	p_val_adj
Gpihbp1	0	3.39949	0.855	0.058	0
Aqp1	0	2.86267	0.446	0.034	0
Fabp4	0	2.84336	0.963	0.22	0
Cd36	0	2.83585	0.91	0.203	0
Cldn5	0	2.70564	0.676	0.038	0
Egfl7	0	2.63038	0.832	0.072	0
Tm4sf1	0	2.57323	0.788	0.237	0
Rbp7	0	2.488	0.549	0.046	0
Cavin2	0	2.46775	0.873	0.293	0
Cdh5	0	2.44099	0.761	0.035	0
Cd300lg	0	2.43209	0.722	0.057	0
Id1	0	2.39366	0.754	0.189	0
Flt1	0	2.36125	0.7	0.034	0
Tspan13	0	2.32807	0.742	0.057	0
Kdr	0	2.2641	0.617	0.023	0
Mgll	0	2.25766	0.793	0.208	0
Sox18	0	2.21869	0.62	0.034	0
Pecam1	0	2.19331	0.698	0.07	0
Btnl9	0	2.19177	0.552	0.022	0
Tcf15	0	2.18625	0.624	0.055	0
Ptprb	0	2.14797	0.605	0.029	0
Rgcc	0	2.09036	0.76	0.198	0
Emcn	0	2.08647	0.571	0.028	0
Cav1	0	2.08519	0.828	0.31	0
Car4	0	2.06941	0.451	0.055	0
Cav2	0	1.99317	0.658	0.115	0
8430408G22Rik	0	1.95733	0.388	0.027	0
Esam	0	1.94798	0.725	0.086	0
Slc9a3r2	0	1.94627	0.721	0.235	0
C1qtnf9	0	1.92323	0.514	0.017	0
Icam2	0	1.92288	0.554	0.031	0
mt-Nd1	0	1.91198	0.298	0.059	0
Cyyr1	0	1.88563	0.529	0.018	0
Slc6a6	0	1.85987	0.536	0.143	0
Adgrf5	0	1.85397	0.6	0.058	0
Tcim	0	1.81432	0.449	0.034	0
Rflnb	0	1.80931	0.482	0.044	0
Sox17	0	1.79224	0.403	0.02	0
Sgk1	0	1.75695	0.574	0.22	0
Klf2	0	1.75273	0.82	0.37	0
Ushbp1	0	1.74392	0.49	0.025	0
Cdkn1c	0	1.737	0.56	0.245	0
Timp4	0	1.7348	0.495	0.073	0
Myct1	0	1.7225	0.465	0.016	0
Adgrl4	0	1.71588	0.458	0.016	0
Hspb1	0	1.70955	0.805	0.358	0
Cd93	0	1.70571	0.48	0.023	0
Ctla2a	0	1.7024	0.457	0.056	0
Aqp7	0	1.69344	0.445	0.043	0
Jam2	0	1.68102	0.539	0.103	0
S1pr1	0	1.67924	0.454	0.023	0
Tspan7	0	1.67317	0.528	0.093	0
Srgn	0	1.67111	0.717	0.127	0
Kank3	0	1.66546	0.463	0.031	0
Tinagl1	0	1.63783	0.652	0.104	0
Ly6c1	0	1.63712	0.88	0.36	0
Gng11	0	1.6207	0.801	0.394	0
Mmrn2	0	1.61416	0.441	0.026	0
Stmn2	0	1.60925	0.269	0.023	0
Eng	0	1.60805	0.623	0.255	0
Ecscr	0	1.60714	0.549	0.108	0
Cd200	0	1.60713	0.507	0.072	0
Rasip1	0	1.60258	0.435	0.016	0
Kitl	0	1.58364	0.5	0.087	0
Lims2	0	1.57127	0.627	0.198	0
mt-Nd2	0	1.55144	0.214	0.033	0
Podxl	0	1.54467	0.397	0.019	0
Afdn	0	1.51906	0.464	0.119	0
Plk2	0	1.50688	0.453	0.102	0
Hspa1a	0	1.4656	0.447	0.228	0
Gimap6	0	1.45723	0.497	0.076	0
Apold1	0	1.44093	0.354	0.043	0
Palmd	0	1.43574	0.344	0.012	0
Lpar6	0	1.43036	0.37	0.08	0
Epas1	0	1.40929	0.531	0.157	0
Arhgap31	0	1.39721	0.453	0.103	0
Pim3	0	1.38541	0.477	0.2	0
Itga6	0	1.3473	0.363	0.03	0
Tmem88	0	1.33316	0.39	0.09	0
Efna1	0	1.32605	0.321	0.034	0
Unc45b	0	1.32382	0.363	0.047	0
Tie1	0	1.32255	0.331	0.011	0
Tmsb4x	0	1.30871	0.932	0.477	0
Fabp5	0	1.28216	0.642	0.153	0
Rsad2	0	1.28028	0.338	0.12	0
Arid5b	0	1.26987	0.48	0.196	0
Aplp2	0	1.25851	0.763	0.529	0
Serinc3	0	1.2405	0.699	0.448	0
Cdh13	0	1.23248	0.333	0.039	0
Fli1	0	1.22917	0.323	0.033	0
Nrp1	0	1.22899	0.549	0.297	0
Id3	0	1.22593	0.797	0.501	0
Scarb1	0	1.2188	0.313	0.057	0
Cyp4b1	0	1.21855	0.348	0.072	0
Adgrg1	0	1.21628	0.299	0.011	0
Itpkb	0	1.21613	0.396	0.098	0
Calm1	0	1.20785	0.903	0.689	0
Efnb1	0	1.19906	0.341	0.092	0
Ets2	0	1.19774	0.33	0.076	0
Prex2	0	1.17549	0.377	0.086	0
Grrp1	0	1.16485	0.25	0.009	0
Arhgef15	0	1.15989	0.276	0.01	0
Tmcc3	0	1.14796	0.399	0.157	0
Cxcl12	0	1.13698	0.613	0.421	0
Smco4	0	1.12153	0.4	0.194	0
Tgm2	0	1.1112	0.348	0.123	0
Abcg2	0	1.11005	0.34	0.125	0
Ramp2	0	1.10065	0.74	0.52	0
Clec14a	0	1.09927	0.291	0.068	0
Clic5	0	1.09132	0.262	0.015	0
Thrsp	0	1.08896	0.373	0.089	0
Ablim3	0	1.07315	0.243	0.01	0
Cracr2b	0	1.07133	0.26	0.018	0
Clec1a	0	1.05918	0.314	0.077	0
Tcf4	0	1.05867	0.717	0.531	0
Rasgrp3	0	1.05516	0.236	0.01	0
Gimap4	0	1.0551	0.305	0.027	0
Smagp	0	1.0535	0.266	0.023	0
Afap1l1	0	1.05043	0.243	0.011	0
Ly6e	0	1.04774	0.892	0.606	0
Ltbp4	0	1.04761	0.424	0.199	0
Hspa12b	0	1.04371	0.27	0.039	0
Elk3	0	1.04184	0.323	0.091	0
Sptbn1	0	1.03881	0.761	0.61	0
Eva1a	0	1.0302	0.214	0.008	0
Cmtm8	0	1.02583	0.239	0.017	0
Pdgfb	0	0.994353	0.23	0.019	0
Uaca	0	0.99303	0.325	0.126	0
Crip2	0	0.989465	0.754	0.537	0
Etl4	0	0.985347	0.224	0.018	0
Fam181b	0	0.980443	0.214	0.01	0
Bcam	0	0.97861	0.352	0.079	0
Arhgap18	0	0.976712	0.245	0.07	0
Pkp4	0	0.969092	0.24	0.033	0
Cd38	0	0.965446	0.223	0.031	0
Ybx1	0	0.963137	0.833	0.688	0
Sema6a	0	0.953709	0.227	0.034	0
Myl12a	0	0.943297	0.78	0.647	0
Itga1	0	0.927881	0.401	0.139	0
Gata2	0	0.925861	0.217	0.01	0
Mef2c	0	0.907433	0.362	0.132	0
Fnbp1l	0	0.896946	0.217	0.038	0
Ndrg1	0	0.895631	0.362	0.125	0
Ggta1	0	0.879256	0.214	0.025	0
Ets1	0	0.870521	0.341	0.122	0
Lmcd1	0	0.850565	0.208	0.025	0
Txnip	0	0.835488	0.682	0.491	0
Lrrc8c	0	0.835338	0.222	0.052	0
Gimap1	0	0.834069	0.231	0.024	0
Cdc42ep3	0	0.813259	0.25	0.061	0
Lmo1	7.49747e-307	0.980837	0.314	0.123	1.37511e-302
mt-Nd3	1.16525e-302	0.870996	0.219	0.057	2.13718e-298
Jup	2.08425e-298	0.983786	0.371	0.169	3.82273e-294
mt-Nd4	6.25429e-294	1.20886	0.27	0.085	1.1471e-289
Ppp1r2	2.98048e-293	1.01609	0.608	0.476	5.4665e-289
mt-Co2	6.73425e-293	1.31867	0.202	0.049	1.23513e-288
Ptma	6.85783e-292	0.618879	0.817	0.686	1.25779e-287
Myo10	3.80959e-283	0.888632	0.238	0.074	6.98718e-279
Tmem204	3.99466e-281	0.782895	0.24	0.073	7.3266e-277
Anp32a	1.76066e-276	1.01782	0.566	0.434	3.22923e-272
Sult1a1	4.95347e-275	0.993247	0.343	0.15	9.08516e-271
Dock9	3.48348e-271	0.826428	0.242	0.079	6.38904e-267
Ldb2	5.26065e-271	0.778201	0.207	0.058	9.64856e-267
Ctnnbip1	9.7784e-260	1.03143	0.376	0.194	1.79346e-255
Pcdh1	1.10236e-258	0.766006	0.207	0.059	2.02183e-254
Bvht	2.69451e-257	0.764678	0.209	0.061	4.94201e-253
B4galt4	6.87721e-257	0.797743	0.204	0.059	1.26135e-252
Plpp1	7.57648e-255	1.20965	0.499	0.336	1.3896e-250
Dusp3	2.21664e-254	0.95523	0.356	0.173	4.06553e-250
Btg2	4.1719e-247	0.991622	0.683	0.568	7.65168e-243
Plcb4	4.42574e-243	0.867848	0.31	0.133	8.11725e-239
Gnai2	1.14867e-240	0.826667	0.654	0.598	2.10678e-236
mt-Nd5	3.24623e-239	0.870766	0.328	0.141	5.95392e-235
Tanc1	2.35788e-234	0.806367	0.241	0.086	4.32459e-230
Tmod3	1.35516e-228	0.937784	0.417	0.248	2.48551e-224
mt-Atp6	1.75094e-223	1.2954	0.214	0.068	3.21139e-219
Tjp1	5.09708e-222	0.82119	0.265	0.108	9.34856e-218
Dab2ip	1.62972e-220	0.821704	0.267	0.109	2.98906e-216
Ucp2	6.16996e-219	0.723624	0.249	0.094	1.13163e-214
Ctnna1	3.57358e-211	0.896339	0.424	0.266	6.5543e-207
Utrn	5.11711e-209	0.864314	0.393	0.226	9.3853e-205
Tek	1.60982e-205	0.755314	0.311	0.145	2.95256e-201
Ablim1	3.41848e-200	0.716597	0.449	0.272	6.26983e-196
Pitpnc1	6.9962e-200	0.742114	0.218	0.079	1.28317e-195
Meox2	1.17154e-199	0.791778	0.314	0.151	2.14872e-195
Luzp1	8.39586e-197	0.856097	0.426	0.275	1.53988e-192
Nck1	8.0713e-196	0.974355	0.369	0.217	1.48036e-191
Slfn5	5.84565e-195	0.782536	0.622	0.502	1.07215e-190
Fam212a	8.13372e-194	0.833166	0.24	0.098	1.49181e-189
H2-D1	5.90084e-193	0.38218	0.849	0.697	1.08227e-188
Jcad	6.42301e-190	0.690082	0.217	0.081	1.17804e-185
Sh3bp5	1.35986e-186	0.855902	0.254	0.112	2.49412e-182
4931406P16Rik	1.38142e-184	0.795743	0.267	0.121	2.53366e-180
Pltp	4.83522e-184	0.809881	0.217	0.083	8.86827e-180
Wasf2	2.08716e-183	0.846426	0.515	0.408	3.82807e-179
Mapk3	5.35543e-182	0.909511	0.461	0.342	9.8224e-178
Acvrl1	1.02311e-179	0.861916	0.363	0.216	1.87648e-175
Rgs3	1.22322e-176	0.736764	0.23	0.095	2.24351e-172
Sorbs1	8.27646e-176	0.64007	0.225	0.088	1.51798e-171
Cbfa2t3	2.07837e-172	0.632279	0.235	0.096	3.81193e-168
Tgfb1	1.75249e-171	0.712511	0.266	0.123	3.21423e-167
Fryl	5.49416e-171	0.705587	0.201	0.076	1.00768e-166
Cdkn1a	2.00611e-170	0.893366	0.452	0.305	3.6794e-166
Cd81	1.75278e-169	0.42728	0.811	0.706	3.21478e-165
Ccdc85b	2.28593e-168	0.827206	0.29	0.148	4.19262e-164
Adam15	2.14149e-165	0.863289	0.347	0.206	3.92771e-161
Ddit4	2.64611e-164	0.807254	0.252	0.117	4.85322e-160
Atp5j	1.09637e-163	0.601912	0.727	0.672	2.01086e-159
Dhrs3	1.40488e-163	0.881252	0.299	0.158	2.57668e-159
Snrk	1.49082e-157	0.794124	0.439	0.311	2.73432e-153
Mpzl1	3.55914e-156	0.799043	0.248	0.117	6.52781e-152
Bst2	7.49159e-155	0.565136	0.682	0.538	1.37403e-150
Sh3glb1	5.29212e-151	0.75552	0.6	0.573	9.70627e-147
Gstt2	4.83279e-150	0.920262	0.305	0.172	8.86382e-146
Ubc	1.49993e-149	0.687289	0.659	0.554	2.75102e-145
Pdzd2	1.59842e-148	0.857914	0.322	0.183	2.93167e-144
Tagln2	2.73451e-146	0.648046	0.566	0.461	5.01537e-142
Pls3	2.54484e-145	0.823539	0.354	0.222	4.6675e-141
Timp3	7.17014e-145	0.55072	0.631	0.522	1.31508e-140
Tubb4b	9.95589e-143	0.793221	0.511	0.412	1.82601e-138
Gngt2	2.06406e-142	0.847776	0.323	0.19	3.7857e-138
Ece1	4.83063e-140	0.816942	0.346	0.219	8.85986e-136
Hpcal1	9.59665e-140	0.726827	0.274	0.144	1.76012e-135
Arpc3	4.47229e-139	0.675008	0.608	0.571	8.20263e-135
Myl12b	4.71391e-136	0.786528	0.522	0.457	8.64579e-132
Ddx5	8.13451e-136	0.541244	0.706	0.653	1.49195e-131
Ctnnb1	1.74407e-132	0.823952	0.469	0.39	3.19879e-128
Chchd10	2.47206e-132	0.545675	0.265	0.131	4.53401e-128
Tsc22d1	6.52822e-129	0.641393	0.498	0.386	1.19734e-124
Rab11a	1.17066e-128	0.816829	0.455	0.368	2.1471e-124
Klf4	5.91005e-128	0.595522	0.599	0.466	1.08396e-123
Sypl	7.5423e-124	0.789321	0.385	0.277	1.38333e-119
Ehd2	1.13755e-117	0.781133	0.431	0.347	2.08638e-113
Pnpla2	3.23507e-117	0.650147	0.314	0.188	5.93345e-113
Cyr61	5.24753e-116	0.812807	0.459	0.339	9.6245e-112
Dusp1	7.26358e-116	0.642805	0.605	0.515	1.33221e-111
Apbb2	2.36938e-115	0.652806	0.274	0.154	4.34567e-111
Ehd1	3.28885e-115	0.815147	0.402	0.309	6.03207e-111
Fam43a	4.63909e-115	0.722663	0.242	0.129	8.50856e-111
Notch1	2.61712e-112	0.66559	0.234	0.124	4.80006e-108
Cavin1	2.81687e-108	0.649924	0.568	0.53	5.16642e-104
2022-09-04	2.97915e-107	0.523576	0.347	0.223	5.46406e-103
Hyal2	3.19045e-107	0.684427	0.203	0.102	5.85161e-103
mt-Nd4l	3.20585e-107	0.771356	0.307	0.19	5.87986e-103
Gnas	2.12396e-106	0.418682	0.759	0.75	3.89555e-102
Thbd	4.54347e-105	0.689784	0.296	0.18	8.33319e-101
Fez2	1.79754e-101	0.666363	0.32	0.21	3.29688e-97
Socs2	3.37825e-101	0.604435	0.213	0.109	6.19605e-97
BC028528	7.25207e-100	0.632831	0.208	0.107	1.3301e-95
Msn	2.97948e-98	0.690616	0.447	0.372	5.46467e-94
Dram2	7.83047e-98	0.73841	0.263	0.16	1.43619e-93
Gm42418	1.12862e-97	0.225583	0.613	0.456	2.07e-93
Cd151	6.10041e-97	0.684646	0.458	0.388	1.11888e-92
Pparg	2.64372e-95	0.805477	0.363	0.272	4.84884e-91
Vamp5	6.84855e-95	0.69719	0.257	0.154	1.25609e-90
Kctd10	4.3398e-94	0.701578	0.26	0.159	7.95962e-90
Fmo1	2.21643e-91	0.732667	0.227	0.13	4.06515e-87
Ercc1	6.00399e-91	0.700369	0.248	0.15	1.10119e-86
Rdx	1.38791e-90	0.803291	0.483	0.458	2.54557e-86
Tnfaip1	4.63033e-90	0.700965	0.277	0.178	8.49248e-86
Hrct1	1.0286e-88	0.686426	0.278	0.176	1.88655e-84
Klf7	3.21526e-87	0.700105	0.367	0.278	5.89711e-83
Ly6a	7.6637e-86	0.25661	0.752	0.585	1.4056e-81
Tmbim6	2.41384e-84	0.513671	0.638	0.651	4.42723e-80
Clic1	2.1314e-80	0.565036	0.568	0.552	3.9092e-76
Ptp4a3	7.15612e-80	0.584094	0.287	0.191	1.3125e-75
Tns1	4.13598e-78	0.545258	0.395	0.302	7.5858e-74
Fcho2	1.822e-71	0.626911	0.22	0.134	3.34173e-67
Dnaja1	4.44361e-70	0.4977	0.593	0.57	8.15003e-66
Actn4	8.82676e-70	0.673056	0.385	0.321	1.61892e-65
H2-T23	2.82596e-67	0.549458	0.497	0.445	5.18309e-63
Rhoa	3.1229e-67	0.5083	0.61	0.616	5.72771e-63
Ier3	8.38386e-67	0.848139	0.345	0.268	1.53768e-62
Xiap	1.00519e-66	0.647463	0.251	0.168	1.84362e-62
Sptan1	2.22569e-66	0.619069	0.312	0.233	4.08214e-62
Arhgap29	4.28167e-66	0.686608	0.316	0.241	7.85301e-62
Plvap	1.05497e-64	1.41811	0.211	0.134	1.93492e-60
Elovl5	1.07605e-64	0.591406	0.234	0.15	1.97358e-60
Wwtr1	3.52096e-62	0.614372	0.277	0.199	6.45779e-58
Lmo2	4.65704e-62	0.566914	0.201	0.122	8.54148e-58
Gna11	1.81419e-61	0.678289	0.353	0.294	3.3274e-57
Rbm39	2.87816e-60	0.396815	0.686	0.723	5.27883e-56
S100a16	5.2464e-59	0.431995	0.57	0.533	9.62242e-55
Cox5a	2.1449e-58	0.251716	0.485	0.397	3.93397e-54
Tob1	1.15855e-57	0.651359	0.295	0.222	2.1249e-53
Hnrnpf	2.22525e-57	0.533118	0.533	0.519	4.08134e-53
Ptbp3	4.26921e-57	0.634718	0.306	0.236	7.83016e-53
Tpm3	1.5297e-55	0.624158	0.406	0.372	2.80562e-51
App	1.28477e-54	0.472607	0.567	0.574	2.3564e-50
Hspa8	1.11134e-53	0.328444	0.682	0.626	2.03832e-49
Ppfibp1	7.50113e-53	0.651056	0.366	0.318	1.37578e-48
Tmem140	3.22299e-52	0.617009	0.36	0.303	5.91129e-48
Adipor2	6.64768e-52	0.589258	0.221	0.152	1.21925e-47
Srsf5	8.46876e-52	0.554611	0.515	0.502	1.55326e-47
Klf13	3.64755e-51	0.624829	0.409	0.377	6.68998e-47
Fkbp1a	2.38638e-50	0.478578	0.617	0.651	4.37686e-46
Il6st	4.54967e-49	0.21841	0.206	0.361	8.34456e-45
Psmb8	4.73027e-49	0.491919	0.534	0.521	8.67579e-45
Gbp7	6.9292e-48	0.591803	0.268	0.202	1.27088e-43
Cd2ap	9.80284e-47	0.625162	0.252	0.188	1.79794e-42
Mef2a	2.25052e-46	0.533322	0.262	0.194	4.12768e-42
H3f3a	2.99745e-45	0.376374	0.697	0.701	5.49762e-41
Cnn3	4.75861e-45	0.540652	0.42	0.392	8.72776e-41
Taf7	7.38795e-44	0.58039	0.219	0.155	1.35502e-39
Tpm4	2.49158e-42	0.51149	0.521	0.529	4.5698e-38
Wwc2	5.34172e-42	0.576523	0.259	0.199	9.79725e-38
Dst	6.2688e-42	0.536951	0.287	0.228	1.14976e-37
Adipor1	1.76066e-40	0.603099	0.365	0.337	3.22922e-36
Rac1	2.44934e-40	0.455066	0.556	0.592	4.49234e-36
Il10rb	5.73355e-40	0.546332	0.246	0.185	1.05159e-35
Ier2	1.93467e-38	0.501857	0.521	0.477	3.54837e-34
Bnip2	1.42477e-37	0.589029	0.34	0.306	2.61316e-33
Chmp5	1.93024e-37	0.602992	0.366	0.342	3.54025e-33
Vamp3	1.12268e-34	0.575421	0.242	0.192	2.05911e-30
Arl6ip1	1.50195e-34	0.445545	0.516	0.543	2.75473e-30
Slc3a2	1.52915e-34	0.609188	0.339	0.307	2.80461e-30
Ywhah	3.77235e-34	0.570297	0.41	0.404	6.91887e-30
Rtl8a	4.29249e-34	0.540907	0.221	0.166	7.87286e-30
Ndufa8	9.4758e-34	0.551269	0.486	0.5	1.73796e-29
Iigp1	2.49399e-33	0.594363	0.404	0.362	4.57422e-29
Mylip	3.94535e-33	0.53456	0.219	0.166	7.23618e-29
H3f3b	5.26871e-33	0.29279	0.682	0.677	9.66334e-29
Foxp1	5.92535e-32	0.553222	0.29	0.244	1.08677e-27
Tmed5	1.56785e-31	0.601722	0.382	0.374	2.8756e-27
Psme1	5.31935e-31	0.521291	0.451	0.463	9.75622e-27
Btg1	1.47754e-30	0.399498	0.48	0.479	2.70996e-26
Tubb2a	1.96778e-29	0.588175	0.339	0.311	3.6091e-25
Ppp2r5a	3.01729e-29	0.564908	0.264	0.223	5.53402e-25
Syne2	8.84464e-29	0.463477	0.209	0.157	1.62219e-24
Tpst2	3.90238e-27	0.55739	0.236	0.194	7.15735e-23
Rap1a	1.13021e-26	0.497004	0.478	0.514	2.07292e-22
Foxn3	3.6587e-26	0.527793	0.305	0.275	6.71043e-22
Ier5	4.36492e-26	0.504864	0.383	0.357	8.0057e-22
Kif5b	2.38763e-25	0.473247	0.482	0.522	4.37915e-21
Cyb5r3	3.24167e-25	0.591946	0.369	0.371	5.94555e-21
Osbpl9	4.91019e-25	0.485052	0.218	0.175	9.00579e-21
Adamts1	8.87059e-25	0.651539	0.395	0.395	1.62695e-20
Gabarapl2	3.73081e-24	0.484823	0.478	0.524	6.84268e-20
S100a1	4.82409e-24	0.484886	0.448	0.455	8.84786e-20
Ndufc2	1.72443e-22	0.397014	0.506	0.523	3.16278e-18
Fus	3.22502e-22	0.42359	0.564	0.636	5.91502e-18
Heg1	5.74585e-22	0.536441	0.34	0.323	1.05385e-17
Tprgl	7.84092e-22	0.443271	0.437	0.453	1.4381e-17
Cltb	9.0357e-22	0.495819	0.384	0.39	1.65724e-17
Cfl1	8.40962e-21	0.284216	0.641	0.655	1.54241e-16
Epn2	1.11102e-20	0.418799	0.203	0.162	2.03772e-16
Mast4	1.54804e-20	0.512742	0.261	0.23	2.83927e-16
Sod1	3.2582e-20	0.518347	0.383	0.394	5.97586e-16
H2-Q4	3.79853e-20	0.542667	0.289	0.268	6.96688e-16
Kras	5.29047e-20	0.471358	0.249	0.217	9.70325e-16
Glul	9.35939e-20	0.811231	0.392	0.421	1.71661e-15
Baz2b	9.57578e-20	0.484128	0.221	0.186	1.75629e-15
Ccser2	1.01167e-18	0.460404	0.297	0.275	1.85551e-14
Nop53	1.04556e-17	0.442762	0.459	0.505	1.91765e-13
Pcmtd1	1.17829e-17	0.472411	0.283	0.263	2.16111e-13
Cwc15	1.56759e-17	0.210793	0.277	0.404	2.87511e-13
Cmpk1	3.28407e-17	0.201784	0.259	0.379	6.02331e-13
Myh9	4.49522e-17	0.445545	0.214	0.182	8.24468e-13
Uqcc3	1.69969e-16	0.210057	0.255	0.371	3.11741e-12
Nudt4	3.25355e-16	0.286006	0.198	0.292	5.96733e-12
Clec2d	4.83166e-16	0.509949	0.229	0.203	8.86175e-12
Ndufs8	4.88154e-16	0.209008	0.258	0.374	8.95324e-12
Rbm8a	6.52294e-16	0.222169	0.266	0.384	1.19637e-11
Fermt2	1.48403e-15	0.337566	0.483	0.532	2.72187e-11
Ctbp1	2.38945e-15	0.204623	0.272	0.391	4.38249e-11
Psmb10	2.4756e-15	0.468668	0.397	0.422	4.5405e-11
Pdlim1	2.81331e-15	0.41589	0.232	0.202	5.15989e-11
Tmem59	3.03194e-15	0.276586	0.612	0.665	5.56089e-11
Uqcrb	3.51384e-15	0.290647	0.565	0.572	6.44474e-11
Klhl24	3.89686e-15	0.465028	0.252	0.23	7.14724e-11
1110038F14Rik	4.09696e-15	0.215542	0.172	0.252	7.51423e-11
Rnf187	5.40026e-15	0.204952	0.269	0.386	9.90463e-11
Bud31	9.29362e-15	0.227267	0.242	0.347	1.70454e-10
Ywhaq	1.37794e-14	0.431785	0.512	0.588	2.52728e-10
Psmb9	2.41559e-14	0.477275	0.345	0.35	4.43043e-10
Stx12	5.72606e-14	0.467631	0.254	0.237	1.05022e-09
Ddx50	6.90605e-14	0.204213	0.263	0.376	1.26664e-09
Mndal	8.00872e-14	0.465135	0.389	0.4	1.46888e-09
Psmc3	1.53566e-13	0.217542	0.297	0.422	2.81655e-09
Fbln5	4.50916e-13	0.941697	0.322	0.341	8.27025e-09
Pnrc2	5.03406e-13	0.22063	0.182	0.259	9.23296e-09
Mapre1	5.81101e-13	0.212191	0.295	0.419	1.0658e-08
Gbp2	8.29313e-13	0.477616	0.261	0.243	1.52104e-08
Klf3	9.65458e-13	0.41307	0.32	0.316	1.77075e-08
Cript	1.37195e-12	0.211654	0.211	0.3	2.51629e-08
Sbno2	1.6531e-12	0.488772	0.238	0.219	3.03194e-08
Rbm7	2.31547e-12	0.209399	0.21	0.296	4.2468e-08
Lamtor5	2.52954e-12	0.20907	0.358	0.505	4.63943e-08
Ktn1	3.13534e-12	0.401585	0.23	0.209	5.75052e-08
Serinc1	4.23349e-12	0.204339	0.344	0.479	7.76464e-08
Psmd12	6.6937e-12	0.223944	0.23	0.323	1.22769e-07
Arf6	1.51415e-11	0.21753	0.185	0.26	2.77711e-07
Fscn1	1.74076e-11	0.245319	0.223	0.312	3.19272e-07
Snx3	1.8024e-11	0.426121	0.473	0.546	3.30578e-07
Rtn3	1.96087e-11	0.22225	0.294	0.414	3.59643e-07
Irf1	2.35882e-11	0.479937	0.348	0.356	4.3263e-07
Ddrgk1	2.38227e-11	0.254263	0.276	0.386	4.36933e-07
Tap2	2.61926e-11	0.480275	0.298	0.299	4.80398e-07
Nadk	3.10852e-11	0.210611	0.186	0.261	5.70135e-07
Psma6	3.16367e-11	0.206671	0.327	0.453	5.80248e-07
Ostf1	3.76896e-11	0.409286	0.427	0.478	6.91265e-07
Fkbp3	4.14922e-11	0.231441	0.289	0.397	7.61009e-07
Bzw1	4.451e-11	0.219216	0.256	0.357	8.16358e-07
Sertad1	7.78517e-11	0.567045	0.35	0.37	1.42788e-06
Gemin7	7.95009e-11	0.222293	0.197	0.273	1.45813e-06
Psmc4	9.56596e-11	0.220316	0.253	0.35	1.75449e-06
Syf2	1.05147e-10	0.414099	0.336	0.348	1.9285e-06
Tsg101	2.54177e-10	0.209263	0.185	0.256	4.66186e-06
Gnb2	6.16782e-10	0.317622	0.568	0.629	1.13124e-05
Pdcl3	7.97822e-10	0.216101	0.244	0.333	1.46329e-05
Hes1	1.04211e-09	0.480174	0.295	0.294	1.91133e-05
Xaf1	1.888e-09	0.48696	0.275	0.275	3.46277e-05
Dazap2	2.20655e-09	0.447024	0.299	0.304	4.04704e-05
Akap9	2.55055e-09	0.218499	0.219	0.299	4.67796e-05
Golga7	2.73738e-09	0.20819	0.183	0.249	5.02064e-05
Cr1l	2.91618e-09	0.465316	0.303	0.311	5.34856e-05
Tpst1	3.20233e-09	0.251132	0.299	0.409	5.87339e-05
Atox1	3.34391e-09	0.284731	0.535	0.592	6.13307e-05
Akap12	7.5617e-09	0.410795	0.262	0.253	0.000138689
Tra2a	8.9645e-09	0.212016	0.232	0.311	0.000164418
Wbp4	9.00877e-09	0.223395	0.211	0.286	0.00016523
Chmp2a	9.94533e-09	0.42849	0.433	0.492	0.000182407
Utp3	1.30872e-08	0.207075	0.152	0.207	0.000240033
Rraga	1.44215e-08	0.204759	0.21	0.284	0.000264505
Mxd4	2.07306e-08	0.39772	0.444	0.508	0.000380221
Rrp1	2.83621e-08	0.229317	0.243	0.328	0.000520189
Ash1l	2.87042e-08	0.200885	0.233	0.311	0.000526463
Ccnl2	3.78606e-08	0.259965	0.228	0.308	0.000694401
Gsk3b	4.05057e-08	0.202561	0.239	0.318	0.000742915
Fbxw2	4.49185e-08	0.428621	0.267	0.269	0.00082385
Arpp19	4.8166e-08	0.24212	0.322	0.436	0.000883413
S100a13	4.92137e-08	0.230483	0.551	0.6	0.000902628
B230219D22Rik	7.13768e-08	0.207268	0.217	0.289	0.00130912
Arpc2	7.45919e-08	0.288204	0.518	0.587	0.00136809
Vps28	8.10038e-08	0.239345	0.302	0.411	0.00148569
Qk	1.00246e-07	0.424559	0.274	0.277	0.00183861
2022-03-02	1.10922e-07	0.256545	0.298	0.404	0.00203443
Tspan4	1.11453e-07	0.424907	0.316	0.331	0.00204416
Tax1bp3	1.20027e-07	0.240065	0.296	0.397	0.00220141
Spag9	1.29391e-07	0.41782	0.296	0.304	0.00237316
Psma1	1.43905e-07	0.216146	0.347	0.461	0.00263937
Rbm42	1.44515e-07	0.220874	0.208	0.277	0.00265056
Rassf1	1.49422e-07	0.417435	0.252	0.248	0.00274055
Ppp1r11	2.35685e-07	0.236734	0.217	0.29	0.00432271
Ubl3	5.31897e-07	0.360225	0.248	0.245	0.00975552
Rab11b	7.02888e-07	0.227796	0.315	0.423	0.0128917
Bod1l	8.37142e-07	0.226749	0.237	0.311	0.015354
Cbx1	1.06626e-06	0.23806	0.276	0.367	0.0195562
Wnk1	1.12585e-06	0.22683	0.281	0.371	0.0206491
Prrc2c	1.18233e-06	0.234293	0.314	0.422	0.0216851
Nmi	1.20718e-06	0.41765	0.217	0.211	0.022141
Ankrd12	1.21378e-06	0.397356	0.276	0.279	0.0222619
AY036118	1.2497e-06	0.252312	0.312	0.403	0.0229208
Amotl2	1.33044e-06	0.213623	0.156	0.205	0.0244016
Eln	1.38368e-06	0.392291	0.158	0.207	0.0253781
Klf6	1.88424e-06	0.25731	0.504	0.54	0.0345588
Mprip	1.97149e-06	0.221415	0.268	0.354	0.0361592
Mkln1	1.98274e-06	0.223786	0.18	0.236	0.0363655
Dbp	2.07775e-06	0.332083	0.209	0.195	0.0381081
Rsu1	2.21635e-06	0.226125	0.324	0.431	0.04065
Rbck1	3.08373e-06	0.219104	0.172	0.225	0.0565588
Itgb1	6.5961e-06	0.322357	0.479	0.571	0.120979
Rab6a	7.50414e-06	0.239035	0.281	0.37	0.137633
Capn2	8.7786e-06	0.426315	0.308	0.332	0.161008
Bax	8.91923e-06	0.279346	0.348	0.467	0.163588
Maf1	1.07605e-05	0.223237	0.212	0.272	0.197359
Nipbl	1.18839e-05	0.200869	0.241	0.313	0.217962
Sppl2a	1.3019e-05	0.381692	0.201	0.192	0.238782
Raly	1.42376e-05	0.21767	0.311	0.409	0.261133
Arf1	1.49469e-05	0.295094	0.549	0.636	0.274141
Rhob	1.50705e-05	0.427147	0.38	0.419	0.276408
Junb	1.57342e-05	0.254463	0.519	0.542	0.288582
Leprot	1.98282e-05	0.23764	0.235	0.303	0.363669
Sdcbp	2.06028e-05	0.246676	0.37	0.492	0.377876
Cdc42	2.68498e-05	0.251259	0.57	0.636	0.492452
Pnkd	2.76093e-05	0.28867	0.244	0.318	0.506382
Dnajb6	3.70342e-05	0.262142	0.297	0.389	0.679244
Pkn2	3.7807e-05	0.245531	0.272	0.354	0.693419
Ppp1cb	4.05825e-05	0.240964	0.281	0.364	0.744323
Atrx	4.33102e-05	0.424505	0.379	0.431	0.794352
Arid4b	4.99074e-05	0.21554	0.191	0.242	0.915352
Vgll4	5.11007e-05	0.205825	0.166	0.212	0.937238
Hnrnpk	5.1595e-05	0.244763	0.564	0.644	0.946304
Clic4	5.33653e-05	0.435521	0.398	0.467	0.978773
1810037I17Rik	7.78907e-05	0.364065	0.432	0.505	1
Jun	8.07236e-05	0.310526	0.591	0.632	1
Elovl1	8.28592e-05	0.252014	0.21	0.269	1
Map7d1	8.45479e-05	0.378006	0.222	0.223	1
Ccdc47	0.000135237	0.252851	0.17	0.216	1
Son	0.000155834	0.319191	0.489	0.575	1
Smchd1	0.000178372	0.211554	0.173	0.218	1
Smpdl3a	0.000211208	0.262304	0.274	0.347	1
Tpr	0.000249853	0.241108	0.379	0.503	1
Top1	0.000260348	0.30406	0.336	0.44	1
Ccnd3	0.000265355	0.404144	0.279	0.298	1
Arhgap5	0.000265946	0.432838	0.248	0.261	1
Rap1b	0.000292949	0.22837	0.395	0.52	1
Sec62	0.000308763	0.20372	0.436	0.566	1
Picalm	0.000438543	0.461478	0.254	0.27	1
Psmc1	0.000496739	0.2801	0.207	0.264	1
Mgat1	0.000678142	0.24168	0.163	0.203	1
Kmt2e	0.000757845	0.357931	0.349	0.392	1
Thoc2	0.000766669	0.282118	0.258	0.331	1
Hnrnpa3	0.000842242	0.244201	0.379	0.491	1
Nfe2l1	0.00090642	0.35307	0.225	0.232	1
Cers5	0.000968004	0.229751	0.178	0.221	1
Arhgdia	0.00114662	0.34953	0.461	0.558	1
Tmbim4	0.00115549	0.291344	0.282	0.364	1
Gbp3	0.00142555	0.443102	0.209	0.213	1
Zcchc6	0.00142962	0.384458	0.253	0.269	1
Rsrc2	0.00152246	0.26997	0.311	0.401	1
Zfp36	0.00161265	0.3227	0.377	0.397	1
Rab5c	0.00164694	0.421137	0.323	0.365	1
Cirbp	0.00170015	0.200906	0.206	0.251	1
Xdh	0.0017418	0.320353	0.209	0.262	1
Nfe2l2	0.00189481	0.270153	0.259	0.327	1
Saraf	0.00257557	0.362152	0.384	0.449	1
Rbm25	0.00259571	0.281337	0.353	0.463	1
Sf3b1	0.00275089	0.349554	0.436	0.526	1
Cyfip1	0.00289248	0.205596	0.179	0.219	1
Atp1b3	0.00304147	0.402477	0.262	0.282	1
Icam1	0.00344465	0.437413	0.226	0.231	1
Sugt1	0.00446332	0.281914	0.281	0.357	1
Ubald2	0.00478698	0.364027	0.264	0.284	1
Oaz2	0.00507229	0.353118	0.356	0.406	1
Dbnl	0.00539947	0.241657	0.18	0.221	1
Prr13	0.00543584	0.241396	0.333	0.42	1
Pgrmc1	0.00575	0.391657	0.339	0.386	1
Prpf4b	0.00607797	0.260025	0.185	0.227	1
Mier1	0.00683965	0.252321	0.214	0.263	1
Abhd17a	0.00716131	0.322415	0.252	0.321	1
Ppp3ca	0.00721493	0.276276	0.272	0.342	1
Lzts2	0.00760392	0.399833	0.25	0.269	1
Dynlt3	0.00990447	0.267458	0.233	0.285	1
Ei24	0.0100334	0.295123	0.201	0.25	1
Gadd45g	0.0124354	0.208721	0.399	0.412	1
Filip1l	0.0129302	0.203098	0.229	0.231	1
Arpc5	0.0168634	0.271064	0.385	0.499	1
Smc1a	0.0180607	0.287035	0.314	0.397	1
Wsb1	0.0183861	0.24379	0.189	0.227	1
N4bp2l2	0.0186798	0.268759	0.217	0.264	1
Ddx6	0.0228547	0.245421	0.221	0.266	1
Gnb1	0.0230527	0.383463	0.382	0.45	1
Dnttip2	0.0234467	0.320131	0.214	0.264	1
Rbx1	0.0244371	0.200737	0.474	0.596	1
Hras	0.0269104	0.277682	0.2	0.242	1
Sp100	0.0278096	0.36187	0.272	0.299	1
Rnf4	0.0283815	0.301288	0.178	0.215	1
Spop	0.0323583	0.353468	0.338	0.391	1
Nol7	0.0325074	0.261196	0.295	0.367	1
Smu1	0.0342228	0.275257	0.177	0.212	1
Hprt	0.0345935	0.403564	0.238	0.26	1
Slc38a2	0.03532	0.213934	0.347	0.428	1
Hist1h2bc	0.0361021	0.250882	0.355	0.43	1
Rsbn1l	0.0458406	0.219785	0.191	0.226	1
Gja1	0.0460978	0.402047	0.196	0.205	1
Hexim1	0.0463761	0.286868	0.21	0.253	1
Cldn15	0.0466446	0.327961	0.208	0.217	1
Gm12216	0.0467492	0.451942	0.306	0.337	1
Ifi35	0.0500627	0.450294	0.289	0.329	1
Atp1a1	0.059903	0.369019	0.232	0.251	1
Kif1b	0.0660824	0.264006	0.209	0.248	1
Nbeal1	0.06611	0.262547	0.215	0.255	1
Ssu72	0.070073	0.406448	0.321	0.378	1
Fzd4	0.0751151	0.2527	0.204	0.241	1
Rock1	0.0763102	0.243629	0.276	0.336	1
Tsnax	0.0770224	0.383905	0.201	0.215	1
Vasp	0.0796883	0.206781	0.26	0.31	1
Nap1l4	0.0798357	0.319093	0.212	0.256	1
Eif4a2	0.08355	0.323116	0.441	0.532	1
Cdk12	0.0875665	0.27217	0.187	0.221	1
Tmpo	0.111348	0.292546	0.209	0.219	1
Ifngr1	0.113239	0.222054	0.441	0.547	1
Tacc1	0.11598	0.372653	0.246	0.272	1
Zfand5	0.120685	0.304345	0.369	0.469	1
Irf7	0.172733	0.227829	0.289	0.328	1
Macf1	0.173031	0.340202	0.289	0.329	1
Srrm2	0.184354	0.206093	0.488	0.616	1
Ddx3x	0.185555	0.333403	0.395	0.481	1
Sbds	0.189841	0.377094	0.295	0.34	1
Psma7	0.191587	0.215978	0.511	0.617	1
Arglu1	0.191834	0.424093	0.311	0.362	1
Lgals9	0.193895	0.354213	0.279	0.341	1
Tmem50a	0.211153	0.26417	0.472	0.57	1
Rnf130	0.217127	0.274976	0.207	0.221	1
Tnfrsf1a	0.226009	0.328733	0.379	0.455	1
Pak1ip1	0.236547	0.372396	0.186	0.202	1
Ssh2	0.238082	0.38693	0.197	0.212	1
Arhgef12	0.24192	0.301808	0.25	0.297	1
Reep3	0.269902	0.315228	0.286	0.345	1
Capza2	0.292436	0.361667	0.375	0.456	1
Ccdc12	0.298344	0.370598	0.386	0.476	1
Vamp8	0.308091	0.291135	0.32	0.391	1
Bcl10	0.312947	0.387821	0.203	0.224	1
Ube2d3	0.317562	0.202454	0.516	0.649	1
Hadhb	0.317678	0.370092	0.272	0.311	1
Higd2a	0.365397	0.370433	0.337	0.405	1
Map4	0.372274	0.326248	0.213	0.235	1
Tapbp	0.376929	0.249944	0.451	0.558	1
Mbnl2	0.385183	0.302039	0.348	0.433	1
Pea15a	0.393356	0.299026	0.254	0.284	1
Tcn2	0.425519	0.355419	0.26	0.295	1
Anxa7	0.434675	0.327033	0.305	0.374	1
Phf20l1	0.43952	0.311876	0.193	0.221	1
Ndel1	0.441394	0.345084	0.247	0.279	1
Ifi203	0.445907	0.259199	0.338	0.398	1
Hmg20b	0.461646	0.389186	0.24	0.274	1
Elf1	0.491301	0.257993	0.224	0.256	1
Srsf2	0.493121	0.330724	0.394	0.472	1
Palm	0.507356	0.339346	0.193	0.211	1
Trim47	0.50937	0.371561	0.239	0.27	1
Bnip3l	0.567949	0.280066	0.418	0.528	1
Arl6ip5	0.568386	0.338697	0.382	0.468	1
Mob4	0.569761	0.322661	0.206	0.239	1
Tmem123	0.586335	0.330307	0.226	0.255	1
Pdcd10	0.640141	0.288802	0.253	0.295	1
Rbpms	0.645427	0.320002	0.313	0.365	1
Slc50a1	0.683422	0.357466	0.354	0.436	1
H2-Q6	0.773254	0.286505	0.188	0.205	1
Cdk11b	0.792997	0.259806	0.202	0.228	1
Irgm1	0.824724	0.308905	0.203	0.229	1
H1f0	0.881246	0.270644	0.356	0.418	1
Srsf3	0.885552	0.29255	0.42	0.504	1
Rtp4	0.915555	0.352793	0.29	0.334	1
Irf2	0.919902	0.330105	0.189	0.212	1
Tmem109	0.920991	0.337281	0.24	0.28	1
Cebpg	0.931055	0.369442	0.24	0.278	1
Nras	0.94062	0.305649	0.191	0.215	1
Clk1	0.950589	0.330877	0.267	0.31	1
Ppp1r15a	0.954684	0.375741	0.376	0.449	1
Pak2	0.959003	0.311659	0.215	0.245	1
Triobp	0.95983	0.281865	0.203	0.226	1
Prkar1a	0.972954	0.267134	0.398	0.491	1
Dnajc8	0.987862	0.33089	0.344	0.42	1
1700020I14Rik	0.995459	0.346774	0.272	0.322	1

## Sheet: Schwann
	p_val	avg_logFC	pct.1	pct.2	p_val_adj
Mpz	0	4.76906	0.622	0.006	0
Mbp	0	3.98129	0.841	0.029	0
Plp1	0	3.62334	0.921	0.01	0
Kcna1	0	3.58633	0.854	0.002	0
Gatm	0	3.20551	0.837	0.009	0
Cryab	0	3.10367	0.954	0.307	0
Cnp	0	3.05971	0.891	0.105	0
Cd9	0	3.04134	0.977	0.357	0
Gfra3	0	2.85245	0.626	0.002	0
Mal	0	2.69279	0.701	0.002	0
Matn2	0	2.69177	0.685	0.091	0
Vwa1	0	2.64173	0.762	0.148	0
Ptn	0	2.54148	0.589	0.012	0
Gpm6b	0	2.39705	0.912	0.315	0
S100b	0	2.33563	0.678	0.035	0
Gpr37l1	0	2.2449	0.543	0.001	0
Ncmap	0	2.19684	0.219	0.002	0
Egfl8	0	2.17427	0.57	0.023	0
Aspa	0	2.16589	0.612	0.063	0
Cd59a	0	2.1651	0.678	0.064	0
Kcna2	0	2.16378	0.564	0.037	0
Cadm1	0	2.05365	0.551	0.024	0
Sema3b	0	2.04508	0.628	0.065	0
Sostdc1	0	2.02005	0.457	0.001	0
Nrn1	0	1.98135	0.499	0.003	0
Prx	0	1.97043	0.211	0.005	0
Cdh19	0	1.96242	0.522	0.015	0
Ank3	0	1.9478	0.518	0.018	0
Plekhb1	0	1.91401	0.459	0.002	0
Pllp	0	1.87463	0.209	0.009	0
Art3	0	1.83622	0.829	0.117	0
Fcgr2b	0	1.8297	0.392	0.005	0
Chl1	0	1.81875	0.463	0.002	0
Pdgfa	0	1.80799	0.57	0.08	0
Cadm4	0	1.73844	0.482	0.002	0
Fabp7	0	1.73287	0.359	0.005	0
Gfra2	0	1.63119	0.443	0.013	0
Cmtm5	0	1.62706	0.415	0	0
Paqr6	0	1.58257	0.384	0.008	0
Sfrp5	0	1.57719	0.428	0.005	0
Hmgcs2	0	1.56278	0.38	0.022	0
Aatk	0	1.55089	0.388	0.012	0
Snca	0	1.53868	0.367	0.004	0
Klk8	0	1.53534	0.415	0.02	0
Ncam1	0	1.50777	0.38	0.02	0
Iqgap2	0	1.46881	0.42	0.036	0
Sox10	0	1.45504	0.359	0.001	0
Gas2l3	0	1.36736	0.282	0.017	0
Ttyh1	0	1.35249	0.33	0.003	0
L1cam	0	1.28476	0.338	0.005	0
Slitrk6	0	1.27969	0.309	0.001	0
Dlgap1	0	1.26989	0.313	0.004	0
Alcam	0	1.25349	0.311	0.009	0
Ptprz1	0	1.24142	0.284	0.001	0
Edil3	0	1.22763	0.296	0.001	0
Gm2115	0	1.215	0.271	0	0
Cadm2	0	1.19404	0.267	0.001	0
Csmd1	0	1.18969	0.288	0.005	0
Fam89a	0	1.1805	0.305	0.022	0
Dhh	0	1.17911	0.267	0.008	0
Gjc3	0	1.16465	0.259	0.001	0
Mboat2	0	1.14501	0.267	0.005	0
Wnt6	0	1.13775	0.265	0.006	0
Shpk	0	1.13629	0.269	0.013	0
Itgb8	0	1.12853	0.255	0.005	0
Retreg1	0	1.11761	0.288	0.016	0
Kcna6	0	1.10115	0.248	0.001	0
Serpind1	0	1.09384	0.225	0	0
Slc35f1	0	1.06851	0.251	0.002	0
Erbb3	0	1.05433	0.244	0.003	0
Nkd2	0	1.04152	0.253	0.011	0
Nkain4	0	1.02308	0.232	0.004	0
Foxd3	0	0.98992	0.234	0	0
Moxd1	0	0.97449	0.242	0.003	0
Insc	0	0.972149	0.219	0.002	0
Zfp536	0	0.954815	0.217	0	0
Rasgef1c	0	0.952903	0.228	0	0
Adgrg6	0	0.870789	0.211	0.003	0
Lpcat2	1.03448e-305	0.936194	0.253	0.015	1.89734e-301
Cyp2j9	2.20886e-302	1.24863	0.342	0.03	4.05126e-298
Fam178b	1.43334e-286	1.81645	0.219	0.013	2.62888e-282
Ndrg1	8.17044e-280	2.11618	0.699	0.153	1.49854e-275
Hbegf	6.14081e-263	1.48304	0.426	0.055	1.12629e-258
Prnp	1.96951e-257	2.95554	0.808	0.294	3.61229e-253
S100a4	1.59702e-256	1.88935	0.574	0.11	2.92909e-252
Tspan15	3.36434e-245	1.36268	0.495	0.078	6.17053e-241
Sorbs2	4.19563e-234	1.04717	0.344	0.038	7.6952e-230
Matn4	2.1185e-229	0.968778	0.217	0.016	3.88555e-225
Lgi4	5.62603e-228	1.43489	0.47	0.079	1.03187e-223
Dbi	1.30874e-214	2.59632	0.889	0.442	2.40036e-210
Rxrg	9.26526e-212	1.08508	0.288	0.031	1.69934e-207
Adam11	1.44851e-202	1.00104	0.232	0.021	2.65671e-198
Fgl2	2.18342e-197	2.39218	0.582	0.147	4.0046e-193
Pmp22	5.97765e-197	3.14341	0.885	0.474	1.09636e-192
Scn7a	3.91754e-190	2.33625	0.656	0.216	7.18516e-186
Stmn1	5.24497e-184	1.72155	0.656	0.181	9.6198e-180
Gtdc1	1.52147e-181	1.02071	0.232	0.023	2.79054e-177
Ngfr	2.01423e-179	0.872928	0.209	0.019	3.69431e-175
Fign	1.94043e-175	1.05254	0.242	0.026	3.55895e-171
Limch1	3.41291e-159	1.4691	0.472	0.104	6.25962e-155
Fxyd1	3.29474e-153	1.81501	0.848	0.545	6.04288e-149
Pou3f1	3.23092e-150	1.02346	0.203	0.021	5.92583e-146
Emp2	1.94864e-147	1.40881	0.58	0.18	3.574e-143
Sfrp1	8.6085e-144	1.70914	0.553	0.171	1.57888e-139
Tmod2	9.21766e-144	1.27542	0.434	0.098	1.69061e-139
Hspb2	1.9723e-142	0.935487	0.276	0.039	3.61739e-138
Mcam	2.9418e-141	0.989473	0.355	0.063	5.39556e-137
Csrp1	4.8407e-141	1.36452	0.706	0.292	8.87833e-137
Syt11	1.79568e-134	0.987233	0.28	0.044	3.29345e-130
Rtkn	5.98131e-133	0.973805	0.255	0.037	1.09703e-128
Malat1	1.31248e-131	1.06463	0.948	0.778	2.40723e-127
Fbxo7	8.49677e-126	1.07935	0.338	0.067	1.55839e-121
Snta1	6.17733e-125	1.01961	0.282	0.048	1.13298e-120
Mid1ip1	1.04957e-121	1.27698	0.463	0.129	1.92502e-117
Atp6v0e2	5.65308e-119	0.75763	0.211	0.028	1.03683e-114
Enho	2.13798e-118	1.0438	0.284	0.051	3.92126e-114
Fez1	5.10897e-115	1.14216	0.405	0.099	9.37036e-111
Endod1	3.59618e-112	0.882251	0.261	0.044	6.59575e-108
Scd2	9.42664e-108	1.82394	0.597	0.258	1.72894e-103
Cnn3	1.37702e-106	1.41341	0.704	0.392	2.52559e-102
Mrgprf	1.77786e-103	0.988709	0.309	0.066	3.26078e-99
Shisa4	2.42016e-102	1.06252	0.313	0.069	4.43882e-98
Itm2a	4.7533e-102	1.25533	0.658	0.308	8.71803e-98
Deptor	9.38775e-99	1.27065	0.426	0.131	1.72181e-94
Slc44a1	5.65549e-93	1.19883	0.495	0.181	1.03727e-88
Tubb2b	2.7329e-91	1.14032	0.286	0.064	5.0124e-87
Atp1a2	7.92665e-90	1.29306	0.507	0.197	1.45383e-85
Afap1l2	1.28459e-89	0.790061	0.223	0.04	2.35606e-85
Cyp2j6	9.75483e-89	1.08663	0.349	0.095	1.78913e-84
Sat1	2.14453e-88	1.39661	0.729	0.46	3.93328e-84
Cpe	1.60061e-85	0.917603	0.372	0.1	2.93567e-81
Apoe	3.24876e-85	1.67419	0.676	0.391	5.95855e-81
Sdc4	1.32403e-84	1.29225	0.459	0.172	2.42839e-80
Secisbp2l	1.81771e-84	1.63848	0.384	0.12	3.33387e-80
Lbh	2.39321e-84	0.992449	0.361	0.103	4.38938e-80
Tuba1a	1.11137e-80	1.31343	0.789	0.599	2.03837e-76
Stard13	6.88527e-79	0.729621	0.236	0.049	1.26283e-74
Dst	3.06643e-78	1.10805	0.534	0.232	5.62414e-74
Tax1bp3	1.19004e-77	1.18419	0.641	0.377	2.18265e-73
Itga6	4.96899e-77	0.766258	0.313	0.079	9.11362e-73
Gng2	2.07241e-76	0.988781	0.257	0.059	3.801e-72
Dmd	6.87681e-76	0.874368	0.253	0.056	1.26128e-71
Megf9	1.49287e-75	1.10503	0.351	0.108	2.73806e-71
Gas7	1.55228e-73	1.0617	0.397	0.133	2.84703e-69
Prex2	2.00274e-72	0.773585	0.399	0.127	3.67323e-68
Pcbp4	7.91207e-68	1.10414	0.434	0.177	1.45115e-63
Dhrs1	2.92206e-67	1.22904	0.407	0.16	5.35935e-63
Arpc1a	5.65887e-67	1.31397	0.647	0.416	1.03789e-62
Ccnd1	8.19995e-67	0.807868	0.263	0.066	1.50395e-62
Lhfpl2	8.93573e-66	0.824992	0.217	0.049	1.6389e-61
Ptpre	2.1715e-65	1.05704	0.217	0.049	3.98276e-61
Stx7	3.18061e-65	1.0924	0.449	0.191	5.83355e-61
Ptk2	1.00257e-62	0.920188	0.347	0.116	1.83882e-58
Ldhb	1.59053e-61	1.21923	0.547	0.28	2.91719e-57
Asap2	2.24891e-61	0.999324	0.367	0.131	4.12472e-57
Sorbs1	5.15519e-61	0.774337	0.336	0.106	9.45514e-57
Lgals3	1.95554e-60	1.4681	0.426	0.181	3.58666e-56
Prkca	4.25064e-56	0.918046	0.282	0.087	7.7961e-52
Tsc22d4	3.0092e-55	1.1926	0.428	0.191	5.51917e-51
Cdkn2c	2.37636e-54	0.956835	0.319	0.113	4.35848e-50
Grb14	3.63009e-54	1.03825	0.313	0.111	6.65795e-50
Utrn	7.48105e-54	0.983677	0.501	0.247	1.3721e-49
Cttnbp2nl	1.84902e-53	0.787214	0.248	0.072	3.3913e-49
Efhd1	1.33149e-52	0.754282	0.336	0.115	2.44209e-48
Fxyd6	2.40123e-52	1.60429	0.209	0.055	4.40409e-48
Cystm1	1.36724e-50	0.745212	0.322	0.112	2.50765e-46
Metrn	3.01545e-50	0.865896	0.265	0.085	5.53064e-46
Ndrg2	1.68105e-49	0.892542	0.457	0.223	3.08321e-45
Pdlim4	6.64282e-49	1.23037	0.443	0.231	1.21836e-44
Aldh1a1	8.30156e-47	1.277	0.386	0.176	1.52259e-42
Adam23	2.41686e-46	1.05236	0.426	0.212	4.43276e-42
Anxa5	6.48444e-45	1.15936	0.706	0.595	1.18931e-40
Olfml2b	1.0444e-44	1.02525	0.459	0.244	1.91553e-40
Ckb	8.91345e-44	0.911321	0.568	0.342	1.63482e-39
Nr4a2	4.82488e-43	0.978093	0.223	0.067	8.84932e-39
Gulp1	2.81138e-42	0.768803	0.294	0.111	5.15635e-38
Col16a1	3.90856e-42	0.820826	0.265	0.094	7.16868e-38
Sirt2	5.44282e-42	0.995121	0.461	0.255	9.98267e-38
Laptm4b	6.68558e-40	0.722046	0.282	0.106	1.2262e-35
Vim	7.10846e-40	0.819509	0.779	0.701	1.30376e-35
Itpk1	9.47466e-40	0.839986	0.263	0.097	1.73775e-35
Zeb2	1.85012e-39	1.00982	0.578	0.41	3.3933e-35
Tmem50a	4.30368e-38	0.832177	0.681	0.553	7.89338e-34
Arpc1b	9.5292e-37	0.993269	0.724	0.647	1.74775e-32
Qk	2.27064e-36	1.06136	0.463	0.274	4.16457e-32
Phlda3	4.44418e-36	0.780789	0.459	0.264	8.15106e-32
Itgav	6.53895e-36	0.83009	0.311	0.135	1.19931e-31
Tubb5	8.33127e-36	1.0476	0.605	0.44	1.52804e-31
Frmd8	1.15427e-35	0.617991	0.232	0.082	2.11704e-31
Slc31a2	1.94327e-35	0.765178	0.259	0.099	3.56416e-31
Col27a1	1.98182e-35	0.930729	0.307	0.135	3.63486e-31
Vgll3	8.22501e-35	0.777916	0.282	0.114	1.50855e-30
Cd200	3.55685e-34	0.455283	0.336	0.137	6.52362e-30
Phgdh	1.95023e-33	0.906356	0.372	0.189	3.57693e-29
Abi3bp	3.74127e-33	0.84586	0.522	0.341	6.86186e-29
Tecr	1.25132e-32	0.91737	0.589	0.459	2.29505e-28
Bcl2	1.5883e-32	0.747583	0.267	0.108	2.9131e-28
Prss23	2.05403e-32	0.741836	0.589	0.412	3.76729e-28
Postn	5.54979e-32	1.01082	0.53	0.353	1.01789e-27
Msmo1	6.37232e-32	0.839394	0.244	0.095	1.16875e-27
Frmd4a	4.03997e-31	0.872924	0.311	0.145	7.4097e-27
Asrgl1	2.47307e-30	0.663125	0.205	0.074	4.53585e-26
Abca8b	5.0929e-30	0.73265	0.248	0.1	9.34088e-26
Cdc42ep3	9.38134e-30	0.625647	0.234	0.088	1.72063e-25
Fabp5	3.15951e-27	0.339784	0.443	0.226	5.79486e-23
Map1b	6.28535e-27	0.770047	0.392	0.228	1.1528e-22
Tppp3	1.77161e-26	0.568293	0.578	0.375	3.24932e-22
Cadm3	2.06721e-26	0.626246	0.307	0.142	3.79147e-22
Srebf1	2.5798e-26	0.880864	0.296	0.149	4.73162e-22
Adam10	6.56694e-26	0.788923	0.296	0.145	1.20444e-21
Dag1	7.30618e-26	0.825457	0.52	0.393	1.34003e-21
Fads1	8.39597e-26	0.805984	0.307	0.156	1.5399e-21
Capg	1.91871e-25	0.825085	0.537	0.408	3.51911e-21
Cdkn1a	8.8844e-25	0.855185	0.497	0.325	1.62949e-20
Agap1	9.70483e-25	0.586861	0.261	0.118	1.77996e-20
Epdr1	2.13339e-24	0.680647	0.238	0.104	3.91284e-20
Fam213b	2.68725e-24	0.755209	0.255	0.12	4.92868e-20
Plce1	9.51361e-24	0.596826	0.23	0.097	1.74489e-19
Tmem237	1.7759e-23	0.611376	0.23	0.101	3.25717e-19
Cd151	2.70846e-23	0.683685	0.522	0.397	4.96759e-19
Crip2	4.21441e-23	0.590473	0.678	0.569	7.72965e-19
Plat	1.44139e-22	0.772397	0.407	0.256	2.64366e-18
Ccser2	2.84933e-22	0.908441	0.418	0.276	5.22595e-18
Rhoc	9.59472e-22	0.753813	0.599	0.527	1.75977e-17
Pea15a	2.17073e-21	0.833433	0.415	0.277	3.98134e-17
Ephx2	3.5575e-21	0.859089	0.267	0.139	6.52482e-17
Mocs2	5.87921e-21	0.754525	0.445	0.315	1.07831e-16
Ctnna1	1.30707e-20	0.651166	0.428	0.288	2.39729e-16
Ivns1abp	1.71904e-20	0.773253	0.259	0.133	3.15288e-16
H3f3b	9.18771e-20	0.569058	0.741	0.677	1.68512e-15
Snx1	1.58109e-19	0.706182	0.342	0.21	2.89988e-15
Ndfip2	3.84454e-19	0.708622	0.328	0.193	7.05128e-15
Pik3ip1	6.38956e-19	0.634672	0.238	0.117	1.17191e-14
Col18a1	9.22787e-19	0.79621	0.386	0.264	1.69248e-14
Ninj1	2.82328e-18	0.617531	0.269	0.148	5.17818e-14
Fam129a	3.76586e-18	0.69968	0.357	0.232	6.90697e-14
Sgcb	5.96238e-18	0.597369	0.282	0.16	1.09356e-13
Bhlhe40	3.52512e-17	0.615063	0.251	0.131	6.46542e-13
Pmepa1	3.76339e-17	0.551404	0.257	0.136	6.90244e-13
Rnd3	4.82754e-17	0.653649	0.286	0.166	8.85419e-13
Marcksl1	6.26759e-17	0.574005	0.24	0.125	1.14954e-12
Ahnak2	1.0175e-16	0.524691	0.39	0.255	1.86619e-12
Ywhae	1.05631e-16	0.578745	0.622	0.573	1.93738e-12
Adk	1.25953e-16	0.622786	0.305	0.186	2.3101e-12
Rsu1	1.77181e-16	0.639171	0.497	0.413	3.24968e-12
Tln2	2.66307e-16	0.510678	0.217	0.109	4.88433e-12
Dynlrb1	7.94537e-16	0.62735	0.624	0.566	1.45726e-11
Timp3	9.4859e-16	0.415203	0.656	0.537	1.73981e-11
Plekha5	2.22873e-15	0.578581	0.248	0.139	4.08772e-11
Lmna	4.92027e-15	0.593219	0.559	0.484	9.02428e-11
Tmbim6	1.03131e-14	0.46246	0.674	0.648	1.89152e-10
Arl8a	1.22198e-14	0.673948	0.255	0.147	2.24123e-10
Snx7	1.97969e-14	0.562437	0.223	0.12	3.63096e-10
Ifit3	2.05988e-14	1.03604	0.334	0.214	3.77802e-10
Selenom	4.88127e-14	0.558367	0.626	0.561	8.95273e-10
Cpne8	5.57763e-14	0.494472	0.223	0.119	1.02299e-09
Itch	5.62751e-14	0.507654	0.207	0.108	1.03214e-09
Apod	5.99856e-14	0.63179	0.482	0.354	1.1002e-09
Tm7sf3	1.482e-13	0.587923	0.286	0.181	2.71814e-09
Higd2a	2.22749e-13	0.702419	0.472	0.393	4.08544e-09
Lamp1	3.27138e-13	0.511805	0.662	0.681	6.00004e-09
Map1lc3a	6.75588e-13	0.552228	0.576	0.527	1.2391e-08
Sncg	1.59465e-12	0.740805	0.205	0.11	2.92474e-08
C4b	1.91862e-12	0.49832	0.303	0.191	3.51893e-08
Vcl	2.58651e-12	0.457907	0.244	0.145	4.74393e-08
Pmvk	6.26995e-12	0.581511	0.203	0.113	1.14997e-07
Jam3	7.0936e-12	0.554786	0.273	0.173	1.30104e-07
Papss1	1.20349e-11	0.656551	0.255	0.162	2.20732e-07
Clstn1	2.10689e-11	0.66817	0.282	0.186	3.86424e-07
Flot1	4.71092e-11	0.571947	0.286	0.193	8.64031e-07
Atp1a1	9.45896e-11	0.612244	0.334	0.246	1.73487e-06
Rnf7	1.0993e-10	0.794011	0.503	0.462	2.01623e-06
Tspan17	1.10124e-10	0.657566	0.236	0.148	2.01979e-06
Cuedc2	1.24817e-10	0.725724	0.355	0.273	2.28927e-06
Ube2e3	1.3371e-10	0.523046	0.361	0.275	2.45237e-06
Tagln2	1.97497e-10	0.62936	0.516	0.477	3.6223e-06
Plec	2.74334e-10	0.454432	0.246	0.155	5.03157e-06
Mbnl2	3.55467e-10	0.526752	0.474	0.419	6.51961e-06
Dynlt3	3.77236e-10	0.576832	0.357	0.275	6.91888e-06
Nop16	4.47921e-10	0.52879	0.211	0.129	8.21531e-06
Cfl2	5.95073e-10	0.536095	0.347	0.269	1.09142e-05
Cltb	1.26407e-09	0.63257	0.447	0.388	2.31843e-05
Fos	1.34613e-09	0.354581	0.413	0.641	2.46893e-05
Hook3	1.42091e-09	0.59642	0.359	0.282	2.60609e-05
Dock7	3.06824e-09	0.521403	0.217	0.136	5.62746e-05
Ten1	3.80462e-09	0.367091	0.209	0.127	6.97804e-05
Npdc1	4.81245e-09	0.56169	0.484	0.451	8.82651e-05
Ywhah	5.0154e-09	0.481076	0.457	0.404	9.19874e-05
Slc44a2	5.03707e-09	0.422462	0.209	0.128	9.23849e-05
Tuba1b	5.63781e-09	0.501201	0.589	0.536	0.000103403
Ss18l2	6.05457e-09	0.66067	0.24	0.162	0.000111047
Tspan3	6.17747e-09	0.61642	0.509	0.486	0.000113301
Atp6v1g1	6.19002e-09	0.448693	0.576	0.558	0.000113531
Josd2	9.47646e-09	0.581305	0.324	0.251	0.000173808
Zfp706	1.01865e-08	0.508831	0.474	0.429	0.00018683
Tubb2a	4.05722e-08	0.549958	0.376	0.315	0.000744134
Fnta	4.84428e-08	0.507321	0.357	0.294	0.00088849
Selenof	7.79096e-08	0.379996	0.678	0.713	0.00142894
Gamt	1.11707e-07	0.484241	0.225	0.154	0.00204881
Sgce	1.17571e-07	0.495686	0.413	0.359	0.00215638
Mpc1	1.69657e-07	0.409629	0.52	0.474	0.00311168
Taldo1	1.77985e-07	0.489279	0.443	0.38	0.00326443
Celf2	1.97996e-07	0.540519	0.514	0.49	0.00363145
Anxa2	2.32287e-07	0.481368	0.608	0.603	0.00426038
Fbxo3	3.32768e-07	0.529445	0.205	0.138	0.00610331
Hmgcs1	3.39202e-07	0.904779	0.24	0.175	0.0062213
Tmbim1	4.23052e-07	0.459871	0.259	0.187	0.00775919
Rnf5	4.51806e-07	0.555356	0.242	0.176	0.00828658
Mindy2	6.09988e-07	0.465919	0.276	0.205	0.0111878
Eif1	6.34008e-07	0.508152	0.714	0.756	0.0116283
Raly	7.43785e-07	0.515265	0.43	0.393	0.0136418
Taf13	1.0804e-06	0.495086	0.217	0.151	0.0198156
Comt	1.27495e-06	0.512618	0.499	0.487	0.0233839
Tprgl	1.38637e-06	0.446715	0.489	0.45	0.0254274
Pdlim1	1.4077e-06	0.32476	0.28	0.206	0.0258185
Asah1	1.5114e-06	0.416262	0.37	0.311	0.0277207
Sparc	2.22511e-06	0.395104	0.695	0.695	0.0408107
Nid2	2.32416e-06	0.460097	0.296	0.234	0.0426275
Ywhaq	3.17778e-06	0.397124	0.572	0.576	0.0582836
Lmo4	3.59099e-06	0.452803	0.357	0.308	0.0658624
Stard3nl	4.43658e-06	0.436526	0.292	0.232	0.0813712
Hnrnpk	4.51829e-06	0.356101	0.614	0.632	0.0828699
Scarb2	4.80238e-06	0.577217	0.372	0.334	0.0880805
Syf2	6.05881e-06	0.486246	0.39	0.346	0.111125
Tmed10	6.1543e-06	0.411101	0.601	0.622	0.112876
Vapa	6.91489e-06	0.50169	0.447	0.428	0.126826
B4gat1	7.43926e-06	0.413762	0.215	0.153	0.136444
Acyp2	8.20291e-06	0.494742	0.242	0.184	0.15045
Lpar1	1.79107e-05	0.470423	0.319	0.267	0.328501
Foxp1	1.83491e-05	0.364533	0.309	0.25	0.336542
Rnf13	2.19956e-05	0.58283	0.29	0.24	0.403421
Nr4a1	2.27603e-05	0.397116	0.303	0.232	0.417447
Abca8a	2.4085e-05	0.382097	0.401	0.346	0.441744
Pon2	2.70196e-05	0.357635	0.317	0.266	0.495566
Rap1a	2.76063e-05	0.45531	0.503	0.509	0.506327
Zfand6	3.11582e-05	0.43373	0.384	0.348	0.571472
Lysmd2	3.29179e-05	0.43733	0.353	0.307	0.603747
Pnisr	4.31051e-05	0.508206	0.357	0.324	0.79059
Dnajc7	6.03391e-05	0.547384	0.248	0.199	1
Rhoa	6.3277e-05	0.36	0.595	0.616	1
Itgb1	7.04351e-05	0.404648	0.52	0.557	1
Mapk3	8.29314e-05	0.434424	0.395	0.36	1
Cfl1	8.51731e-05	0.36531	0.61	0.654	1
1500011K16Rik	0.000102125	0.421835	0.263	0.217	1
Tmem205	0.000103289	0.415766	0.319	0.281	1
Smim15	0.000176966	0.423564	0.238	0.191	1
Cers2	0.00018809	0.526384	0.296	0.261	1
1810037I17Rik	0.000220634	0.461469	0.486	0.494	1
Card19	0.000238922	0.317977	0.234	0.183	1
Degs1	0.000292498	0.434034	0.388	0.38	1
9530068E07Rik	0.000349233	0.418336	0.38	0.362	1
Msn	0.000444197	0.420034	0.397	0.384	1
Ppt1	0.00050154	0.350385	0.267	0.223	1
Prdx6	0.000535934	0.497067	0.493	0.494	1
Ddah2	0.00062609	0.33625	0.445	0.422	1
Trim35	0.000633934	0.427283	0.313	0.276	1
Pam	0.000645727	0.424144	0.305	0.268	1
Vamp8	0.000653963	0.349086	0.397	0.379	1
Marcks	0.000837226	0.339672	0.559	0.594	1
Anxa1	0.000981785	0.255498	0.511	0.479	1
Azin1	0.00107588	0.357145	0.221	0.18	1
Saraf	0.00114194	0.35597	0.438	0.439	1
Scd1	0.00156402	0.462808	0.315	0.288	1
Il10rb	0.00157275	0.299337	0.236	0.194	1
Ifi27l2a	0.00169771	0.573467	0.474	0.45	1
Ctsc	0.0018488	0.321364	0.228	0.189	1
Eid1	0.00185397	0.425339	0.322	0.294	1
Cirbp	0.00249159	0.443225	0.28	0.244	1
Mff	0.00261925	0.391575	0.317	0.293	1
Itfg1	0.00264013	0.394811	0.242	0.21	1
Wipi1	0.00270738	0.435991	0.253	0.221	1
Emc7	0.00286477	0.366591	0.472	0.486	1
Cdc42ep5	0.0031765	0.30924	0.232	0.197	1
Dync1i2	0.0037693	0.399988	0.244	0.213	1
Pkig	0.00474741	0.368436	0.313	0.288	1
Bsg	0.00493957	0.221622	0.639	0.677	1
Cyfip1	0.00587957	0.362566	0.244	0.212	1
Syne2	0.00600202	0.23154	0.203	0.165	1
Kras	0.00636616	0.245996	0.154	0.223	1
Kif5b	0.0065879	0.253925	0.382	0.518	1
Rcn1	0.00680044	0.30431	0.447	0.444	1
App	0.00716802	0.286589	0.539	0.573	1
Cldnd1	0.00741289	0.446798	0.288	0.27	1
Snapin	0.00794391	0.415403	0.257	0.231	1
Glo1	0.00814458	0.42951	0.315	0.306	1
Gbp7	0.00910499	0.357764	0.24	0.212	1
Cdc42se1	0.00961832	0.418214	0.221	0.194	1
Brk1	0.00964431	0.366708	0.474	0.498	1
Ptms	0.0107607	0.212098	0.438	0.566	1
Nfic	0.0109984	0.345131	0.386	0.391	1
Slco3a1	0.0113794	0.262737	0.205	0.169	1
Pla2g16	0.0127429	0.523845	0.386	0.376	1
Dpysl2	0.0139008	0.418347	0.301	0.285	1
Tmem9b	0.0142136	0.385029	0.301	0.285	1
Litaf	0.0143241	0.342474	0.271	0.252	1
Rtn4	0.0143506	0.38569	0.474	0.509	1
Txndc12	0.0143925	0.32331	0.221	0.196	1
Gbp2	0.0158918	0.583936	0.267	0.246	1
Nol7	0.015908	0.326089	0.359	0.355	1
Evi5	0.0172572	0.330493	0.213	0.188	1
Tkt	0.0182754	0.454349	0.355	0.358	1
Manbal	0.018996	0.325676	0.255	0.235	1
Ppp2r2a	0.0191849	0.413472	0.263	0.247	1
Gstm5	0.0196295	0.36432	0.342	0.341	1
Rnf187	0.0202592	0.201738	0.28	0.369	1
Pdlim7	0.022539	0.335593	0.223	0.198	1
Itih5	0.0230071	0.297356	0.468	0.485	1
Srp14	0.0243734	0.330275	0.526	0.577	1
Siva1	0.0263532	0.310024	0.303	0.291	1
Abhd14a	0.0266386	0.434961	0.219	0.202	1
Ktn1	0.0276288	0.391682	0.232	0.212	1
Mgst3	0.0285114	0.364354	0.246	0.227	1
Xaf1	0.0337487	0.401382	0.286	0.275	1
Maf1	0.0360284	0.367768	0.276	0.263	1
Arl3	0.0365822	0.40721	0.338	0.34	1
Cdc42	0.0378372	0.221625	0.587	0.627	1
Mrpl33	0.0380388	0.39721	0.441	0.473	1
B2m	0.0396917	0.219439	0.622	0.748	1
Ifit1	0.0401939	0.608621	0.24	0.215	1
Rab10	0.0418032	0.376144	0.349	0.363	1
Gltp	0.0436119	0.339552	0.269	0.258	1
Pebp1	0.0460462	0.351058	0.555	0.564	1
Snapc5	0.0562248	0.302157	0.292	0.288	1
Vbp1	0.0567679	0.333593	0.221	0.204	1
Snx6	0.0582827	0.330247	0.309	0.311	1
Emp3	0.0594339	0.326835	0.47	0.509	1
Tmem5	0.0609487	0.288719	0.244	0.232	1
Map4	0.0669632	0.409763	0.24	0.231	1
Vgll4	0.0692558	0.367386	0.215	0.204	1
Hadha	0.0711438	0.213117	0.205	0.265	1
Lmbrd1	0.073761	0.265691	0.203	0.184	1
Gbp3	0.0755026	0.35448	0.223	0.213	1
Tgfb1i1	0.0790022	0.257031	0.234	0.221	1
Zmat5	0.0835167	0.295671	0.213	0.199	1
Rab34	0.0873566	0.286929	0.301	0.307	1
Calm2	0.0907033	0.232584	0.555	0.596	1
Ggh	0.0919746	0.331875	0.332	0.345	1
Kif1b	0.0981472	0.366057	0.246	0.242	1
Hax1	0.104121	0.219015	0.165	0.211	1
Sptssa	0.106187	0.292413	0.407	0.433	1
Foxo1	0.109716	0.226803	0.211	0.197	1
Atp1b3	0.116003	0.537051	0.276	0.279	1
Clic4	0.116731	0.360726	0.411	0.457	1
Rex1bd	0.118885	0.27764	0.386	0.412	1
Rbbp4	0.119368	0.32758	0.276	0.275	1
Rsrp1	0.119393	0.316202	0.509	0.539	1
Glod4	0.121086	0.355976	0.207	0.198	1
Mlf2	0.134121	0.338857	0.411	0.443	1
Cfap20	0.137749	0.273128	0.238	0.233	1
Emc10	0.138961	0.284963	0.436	0.48	1
Wdr1	0.14059	0.2774	0.284	0.281	1
Fth1	0.148538	0.683915	0.699	0.718	1
Serinc1	0.148757	0.341749	0.418	0.459	1
Gm16286	0.150011	0.228261	0.232	0.291	1
Ssbp2	0.15038	0.211145	0.186	0.233	1
Son	0.155781	0.237047	0.507	0.562	1
Rbm5	0.158072	0.219788	0.198	0.246	1
Spcs2	0.176181	0.254347	0.451	0.488	1
Prpf4b	0.180862	0.211026	0.175	0.221	1
Vezf1	0.183113	0.261496	0.217	0.212	1
Bub3	0.184593	0.267588	0.29	0.297	1
Uqcc2	0.185026	0.225632	0.43	0.469	1
Ccdc47	0.186167	0.396054	0.213	0.209	1
Rock2	0.188114	0.242542	0.342	0.359	1
S100a16	0.188497	0.240683	0.495	0.54	1
Rab14	0.190316	0.303617	0.459	0.521	1
Hadh	0.195199	0.271859	0.324	0.33	1
Nudc	0.198357	0.228533	0.309	0.384	1
Serpine2	0.201873	0.228533	0.307	0.371	1
Ap2m1	0.204903	0.295007	0.438	0.488	1
Vma21	0.204996	0.223437	0.173	0.214	1
Tmed4	0.205771	0.25648	0.211	0.203	1
Entpd2	0.206071	0.22883	0.43	0.439	1
Vdac3	0.224213	0.229029	0.424	0.458	1
Gabarapl2	0.225696	0.304015	0.463	0.518	1
Fkbp3	0.227651	0.225006	0.322	0.381	1
Hnrnpdl	0.231637	0.214845	0.338	0.415	1
Mpnd	0.242159	0.201673	0.175	0.213	1
Plin3	0.257722	0.220885	0.213	0.26	1
Mpv17	0.259007	0.223607	0.196	0.237	1
Psip1	0.262232	0.348616	0.286	0.301	1
Tmed7	0.266036	0.316579	0.29	0.306	1
Sec11c	0.266977	0.326566	0.263	0.273	1
Add1	0.280248	0.351181	0.225	0.227	1
Nap1l4	0.285833	0.203965	0.207	0.25	1
Pdrg1	0.286649	0.294314	0.221	0.221	1
Asph	0.288993	0.345772	0.221	0.227	1
Atp6ap1	0.29103	0.30063	0.328	0.348	1
Mrpl13	0.293583	0.368311	0.259	0.273	1
Fkbp1a	0.296946	0.20483	0.568	0.647	1
Capn2	0.302353	0.239538	0.309	0.329	1
Ctso	0.303088	0.217763	0.242	0.239	1
Zfyve21	0.307604	0.329418	0.261	0.274	1
Slc3a2	0.309339	0.336835	0.257	0.313	1
Mrps25	0.313386	0.210789	0.175	0.211	1
Magt1	0.317026	0.342737	0.24	0.25	1
Mdh1	0.318757	0.223164	0.399	0.427	1
C1qtnf12	0.323334	0.280394	0.225	0.228	1
Ypel3	0.324613	0.267278	0.482	0.518	1
Mrpl48	0.327403	0.307672	0.265	0.279	1
Adipor1	0.328656	0.281162	0.317	0.342	1
Commd1	0.335234	0.314987	0.334	0.371	1
Slc48a1	0.336117	0.262901	0.205	0.205	1
Capns1	0.34187	0.283606	0.53	0.634	1
Dhrs7	0.342445	0.242877	0.307	0.371	1
Chpt1	0.343789	0.221258	0.196	0.238	1
Dek	0.349985	0.268892	0.365	0.39	1
Prpf19	0.352567	0.267546	0.209	0.211	1
Sptan1	0.355768	0.26127	0.244	0.246	1
Pja1	0.359454	0.239541	0.182	0.215	1
Dynll1	0.374053	0.298053	0.61	0.671	1
Tvp23b	0.385274	0.20901	0.177	0.211	1
Hnrnpl	0.387484	0.212234	0.203	0.24	1
Psmc2	0.387707	0.25616	0.299	0.319	1
Tbcb	0.399154	0.302856	0.336	0.372	1
Eif1b	0.410958	0.270699	0.336	0.367	1
Neat1	0.413864	0.332109	0.374	0.439	1
Hsbp1	0.415168	0.26835	0.486	0.546	1
Aamdc	0.424873	0.343583	0.217	0.222	1
Psmc6	0.429502	0.294721	0.326	0.354	1
Stk25	0.431851	0.247898	0.225	0.23	1
H2-Q4	0.433884	0.236228	0.261	0.271	1
Pmm1	0.439758	0.301901	0.219	0.228	1
M6pr	0.445622	0.26778	0.234	0.243	1
Chmp5	0.45315	0.259838	0.324	0.346	1
Eif4a2	0.465028	0.322803	0.455	0.519	1
Isg15	0.465222	0.228614	0.336	0.375	1
Pik3r1	0.484575	0.263742	0.292	0.309	1
2610001J05Rik	0.484755	0.294427	0.353	0.389	1
Zbtb20	0.489521	0.225819	0.62	0.709	1
Tsg101	0.496179	0.263246	0.236	0.245	1
Thra	0.498422	0.260278	0.278	0.33	1
Dctn2	0.502636	0.277416	0.365	0.404	1
Psmc1	0.503426	0.226178	0.215	0.255	1
Utp11	0.516228	0.340718	0.238	0.251	1
Paics	0.518079	0.317254	0.228	0.24	1
Osgep	0.526822	0.228893	0.219	0.256	1
Gsk3b	0.538485	0.221387	0.257	0.306	1
Mrpl58	0.550553	0.2119	0.24	0.284	1
Arhgap5	0.551318	0.345082	0.24	0.259	1
Psma6	0.559931	0.220121	0.382	0.434	1
Ptov1	0.560728	0.211601	0.367	0.429	1
Khdrbs1	0.565563	0.214578	0.257	0.298	1
BC031181	0.567147	0.292177	0.347	0.382	1
Camk2d	0.567782	0.291136	0.271	0.291	1
Rab7	0.569358	0.244839	0.374	0.453	1
Tmbim4	0.587126	0.288954	0.299	0.352	1
Snx10	0.600073	0.21646	0.188	0.217	1
Pa2g4	0.616325	0.207791	0.255	0.292	1
Sdha	0.640381	0.237765	0.344	0.376	1
Bnip3l	0.641128	0.265872	0.451	0.512	1
Pfdn1	0.656457	0.2751	0.303	0.344	1
Rab5a	0.664149	0.276646	0.232	0.245	1
Atp6ap2	0.673508	0.219848	0.225	0.239	1
Hsd17b12	0.685471	0.270711	0.211	0.224	1
Wdr61	0.687956	0.21443	0.209	0.237	1
Nabp2	0.691005	0.216861	0.194	0.221	1
Lsm14a	0.710484	0.33195	0.19	0.201	1
Supt4a	0.711366	0.308124	0.317	0.354	1
Mesd	0.713219	0.264776	0.23	0.267	1
Cops9	0.728667	0.271737	0.359	0.421	1
Psmb10	0.738226	0.309994	0.349	0.419	1
Hpf1	0.759906	0.213261	0.184	0.206	1
Txnl1	0.764285	0.201861	0.311	0.359	1
Rab6a	0.774772	0.253539	0.305	0.357	1
Leprot	0.777147	0.216871	0.257	0.293	1
Cetn3	0.77723	0.259297	0.361	0.415	1
Atp6v1e1	0.780276	0.243873	0.299	0.341	1
Sec62	0.794528	0.24416	0.472	0.547	1
Ndufv2	0.796341	0.235778	0.401	0.448	1
Fis1	0.798619	0.273954	0.424	0.501	1
Ankrd12	0.805675	0.353708	0.255	0.279	1
Golga7	0.81406	0.281617	0.219	0.239	1
Ppp3ca	0.817559	0.345245	0.296	0.331	1
Ttc14	0.817873	0.298145	0.192	0.207	1
Hmgb1	0.819822	0.236164	0.47	0.533	1
Psmb7	0.823556	0.216077	0.378	0.429	1
Hmgn3	0.828697	0.225824	0.276	0.313	1
Tsc22d3	0.835373	0.309153	0.292	0.318	1
Ndufb4	0.842831	0.231897	0.403	0.46	1
Selenot	0.84424	0.256477	0.269	0.309	1
Tln1	0.848307	0.202348	0.294	0.334	1
Eci1	0.849036	0.202495	0.236	0.264	1
Rrp1	0.858562	0.267388	0.273	0.315	1
Taok1	0.863692	0.2134	0.2	0.22	1
Sbds	0.863871	0.26705	0.29	0.334	1
Parva	0.86615	0.269301	0.198	0.214	1
Polr2f	0.880847	0.230721	0.37	0.428	1
H2-D1	0.884924	0.26833	0.591	0.723	1
Psmc3	0.893541	0.286298	0.344	0.403	1
Snw1	0.89385	0.238753	0.265	0.296	1
Frmd6	0.902732	0.247456	0.223	0.241	1
Os9	0.909981	0.246823	0.282	0.317	1
Sar1b	0.928219	0.212483	0.273	0.314	1
Ccdc59	0.939608	0.234552	0.255	0.282	1
Akap9	0.94891	0.202818	0.261	0.287	1
Anapc16	0.950769	0.308843	0.259	0.29	1
Pigp	0.956509	0.264297	0.353	0.408	1
Lgmn	0.958849	0.202189	0.267	0.293	1
Clptm1	0.960102	0.303921	0.217	0.241	1
Elovl1	0.960157	0.460591	0.23	0.261	1
Rsbn1l	0.971298	0.250914	0.203	0.221	1
Clcn4	0.981952	0.267928	0.215	0.235	1
Tmem33	0.989514	0.273995	0.221	0.247	1
Rnf130	0.993238	0.241394	0.203	0.219	1
Hnrnpr	0.996011	0.242564	0.286	0.327	1

## Sheet: ProlifDiff
	p_val	avg_logFC	pct.1	pct.2	p_val_adj
Car3	0	3.72387	0.594	0.05	0
Adipoq	0	2.16077	0.584	0.051	0
H2afz	0	2.03364	0.935	0.352	0
Hspd1	0	2.00645	0.824	0.284	0
Nnat	0	1.80796	0.538	0.083	0
Fabp5	0	1.77682	0.616	0.187	0
Cox5a	0	1.69635	0.829	0.364	0
Ran	0	1.69009	0.96	0.426	0
Hspe1	0	1.68718	0.87	0.444	0
Birc5	0	1.64245	0.735	0.025	0
Stmn1	0	1.63637	0.798	0.121	0
Pclaf	0	1.59132	0.724	0.022	0
Cks2	0	1.56895	0.781	0.092	0
Gpd1	0	1.54545	0.52	0.055	0
Idh3a	0	1.50232	0.707	0.185	0
Slc25a5	0	1.48926	0.888	0.448	0
Top2a	0	1.46477	0.568	0.02	0
Cyc1	0	1.44882	0.798	0.339	0
Cenpa	0	1.42963	0.588	0.037	0
Ndufab1	0	1.37683	0.849	0.4	0
Atp5b	0	1.36806	0.877	0.517	0
Atp5o.1	0	1.34668	0.852	0.418	0
Ube2c	0	1.31738	0.557	0.019	0
Cdca3	0	1.30442	0.664	0.018	0
Chchd10	0	1.3025	0.379	0.127	0
Tk1	0	1.29158	0.692	0.016	0
Ube2s	0	1.28591	0.858	0.411	0
Selenoh	0	1.24749	0.883	0.221	0
Ak2	0	1.24218	0.791	0.193	0
Rbp4	0	1.23861	0.696	0.133	0
Mrpl12	0	1.23463	0.8	0.275	0
Npm1	0	1.23134	0.926	0.598	0
Uqcrfs1	0	1.22933	0.788	0.38	0
Cenpf	0	1.2291	0.491	0.01	0
Hmgb2	0	1.22686	0.751	0.214	0
Acsl1	0	1.21607	0.555	0.067	0
Mdh2	0	1.21215	0.846	0.42	0
Chchd2	0	1.20329	0.927	0.585	0
Atp5f1	0	1.19587	0.9	0.534	0
Dbi	0	1.18591	0.767	0.414	0
Cdc20	0	1.18574	0.482	0.015	0
Cox4i1	0	1.18415	0.891	0.582	0
Mki67	0	1.18313	0.569	0.012	0
Mcrip2	0	1.17941	0.648	0.104	0
Tubb5	0	1.1677	0.77	0.406	0
Rrm2	0	1.16309	0.581	0.017	0
Prkar2b	0	1.16227	0.733	0.13	0
Ranbp1	0	1.15464	0.915	0.434	0
Cox8a	0	1.14916	0.911	0.551	0
Phgdh	0	1.14233	0.742	0.131	0
Anp32b	0	1.13629	0.916	0.441	0
Cdk1	0	1.13578	0.562	0.025	0
Ndufb9	0	1.13375	0.857	0.496	0
Phb2	0	1.13359	0.831	0.379	0
Cycs	0	1.13274	0.77	0.259	0
Nme1	0	1.12815	0.897	0.392	0
Uqcrq	0	1.12364	0.834	0.42	0
Etfb	0	1.11302	0.806	0.422	0
Hspa9	0	1.11112	0.778	0.284	0
Mif	0	1.10574	0.856	0.392	0
Sod2	0	1.09371	0.759	0.318	0
Atp5a1	0	1.08969	0.828	0.454	0
Eif5a	0	1.08753	0.917	0.545	0
Ccnb2	0	1.08404	0.556	0.021	0
G0s2	0	1.08342	0.649	0.312	0
Smc4	0	1.08322	0.748	0.15	0
Smc2	0	1.07814	0.659	0.069	0
C1qbp	0	1.0774	0.784	0.274	0
Atp5d	0	1.07024	0.847	0.497	0
Cks1b	0	1.07017	0.87	0.269	0
Sdhd	0	1.05481	0.799	0.335	0
Cebpa	0	1.04978	0.666	0.113	0
Mrpl18	0	1.04749	0.869	0.329	0
Agpat2	0	1.03585	0.631	0.14	0
Cenpm	0	1.0316	0.661	0.017	0
Plin1	0	1.03151	0.523	0.038	0
Nhp2	0	1.02181	0.833	0.253	0
Cdca8	0	1.01418	0.518	0.014	0
Ndufb10	0	1.0044	0.825	0.498	0
Hsp90aa1	0	1.00075	0.949	0.601	0
Tomm20	0	1.00036	0.862	0.44	0
Tpi1	0	0.997271	0.805	0.39	0
Eif4ebp1	0	0.996042	0.825	0.363	0
Mrap	0	0.993809	0.566	0.065	0
Ncl	0	0.988948	0.849	0.44	0
Pla2g16	0	0.985611	0.763	0.333	0
Hmmr	0	0.981758	0.444	0.005	0
Ppia	0	0.979621	0.973	0.715	0
Mdh1	0	0.969312	0.739	0.392	0
Prc1	0	0.963632	0.39	0.008	0
Dctpp1	0	0.96285	0.756	0.134	0
Cox7c	0	0.956772	0.902	0.538	0
Timm8a1	0	0.955926	0.676	0.097	0
Scp2	0	0.954546	0.796	0.463	0
Uqcr10	0	0.945633	0.83	0.45	0
Aco2	0	0.942846	0.688	0.227	0
Tuba1b	0	0.940214	0.857	0.501	0
Grpel1	0	0.93701	0.814	0.283	0
Tpx2	0	0.931095	0.472	0.009	0
Pgam1	0	0.92916	0.847	0.379	0
Ndufa4	0	0.926948	0.923	0.557	0
Hp	0	0.92287	0.336	0.048	0
Rpsa	0	0.920983	0.944	0.619	0
Cox6b1	0	0.919078	0.874	0.545	0
Ccna2	0	0.918803	0.491	0.007	0
Arxes2	0	0.915176	0.589	0.062	0
Ifi27	0	0.911827	0.795	0.457	0
Uqcr11	0	0.90269	0.776	0.464	0
Tyms	0	0.900544	0.631	0.063	0
Dtymk	0	0.896907	0.833	0.214	0
Atp5h	0	0.896442	0.858	0.55	0
H2afx	0	0.895474	0.593	0.087	0
Hsp90ab1	0	0.895113	0.965	0.769	0
Knstrn	0	0.894001	0.501	0.014	0
Hint1	0	0.890175	0.949	0.558	0
Nucks1	0	0.887543	0.885	0.342	0
Cox7b	0	0.883055	0.806	0.44	0
Set	0	0.882497	0.87	0.378	0
Ldha	0	0.881734	0.876	0.508	0
Cenpe	0	0.881207	0.384	0.009	0
Tomm5	0	0.878986	0.816	0.425	0
Mpc2	0	0.873302	0.806	0.474	0
Tomm40	0	0.873054	0.757	0.196	0
Hmgb3	0	0.872116	0.662	0.062	0
Ndufb5	0	0.867417	0.845	0.478	0
Pgk1	0	0.865512	0.83	0.316	0
Ndufb6	0	0.862108	0.8	0.426	0
Atp5l	0	0.861768	0.895	0.548	0
Ndufc2	0	0.859788	0.836	0.485	0
Hadh	0	0.859737	0.747	0.283	0
Cox7a2	0	0.855069	0.885	0.495	0
Ndufs7	0	0.854155	0.797	0.445	0
Sdhb	0	0.845935	0.842	0.449	0
Serbp1	0	0.844238	0.906	0.526	0
Immt	0	0.843038	0.773	0.214	0
Spc24	0	0.841237	0.562	0.017	0
Mrpl42	0	0.840843	0.877	0.379	0
Atp5c1	0	0.833305	0.881	0.521	0
Eef1g	0	0.830785	0.919	0.604	0
Ccnb1	0	0.827149	0.39	0.007	0
Rpl10a	0	0.826835	0.934	0.632	0
Uqcrc2	0	0.820442	0.718	0.333	0
Naa50	0	0.816186	0.828	0.235	0
Cox5b	0	0.813519	0.831	0.472	0
Arxes1	0	0.812797	0.54	0.051	0
Eif4a1	0	0.812741	0.876	0.526	0
Hnrnpa1	0	0.812242	0.87	0.4	0
Dut	0	0.811427	0.71	0.146	0
Rps2	0	0.807252	0.933	0.628	0
Timm13	0	0.807219	0.853	0.454	0
Rplp0	0	0.804624	0.949	0.673	0
Tubb6	0	0.796415	0.687	0.279	0
Uqcrc1	0	0.794483	0.777	0.385	0
Cacybp	0	0.791315	0.807	0.256	0
Rpl15	0	0.790088	0.946	0.657	0
Ndufv2	0	0.78989	0.81	0.406	0
Cs	0	0.789875	0.728	0.197	0
Slc25a3	0	0.786948	0.891	0.574	0
Rrm1	0	0.786931	0.589	0.055	0
Glrx5	0	0.779709	0.828	0.308	0
Pmf1	0	0.776852	0.609	0.05	0
Tcp1	0	0.773822	0.854	0.33	0
Mrpl20	0	0.772686	0.842	0.369	0
Eno1	0	0.771473	0.7	0.201	0
Pimreg	0	0.760855	0.415	0.006	0
Cdk4	0	0.760639	0.872	0.371	0
Hdgf	0	0.756212	0.865	0.36	0
Gmnn	0	0.756015	0.534	0.031	0
Adig	0	0.755386	0.377	0.02	0
Cluh	0	0.75384	0.534	0.055	0
Rpl18	0	0.753272	0.94	0.666	0
2010107E04Rik	0	0.753204	0.811	0.419	0
Srm	0	0.752727	0.77	0.257	0
H2afv	0	0.751607	0.84	0.447	0
Ndufa8	0	0.748391	0.829	0.461	0
Ndufa12	0	0.748268	0.801	0.387	0
Cisd1	0	0.747985	0.779	0.235	0
Ptma	0	0.74776	0.944	0.68	0
Echs1	0	0.747719	0.747	0.254	0
Hmgn1	0	0.747586	0.92	0.551	0
Snrpd1	0	0.747258	0.847	0.293	0
Rack1	0	0.746554	0.914	0.606	0
Spc25	0	0.745547	0.395	0.009	0
Slc25a4	0	0.740233	0.93	0.619	0
Lockd	0	0.737931	0.414	0.021	0
Lsm2	0	0.734886	0.761	0.177	0
Pbk	0	0.733329	0.409	0.005	0
Slfn9	0	0.732084	0.491	0.049	0
Mtch2	0	0.726776	0.818	0.354	0
Cox14	0	0.726516	0.857	0.43	0
Vdac1	0	0.726237	0.821	0.287	0
Timm50	0	0.726179	0.692	0.133	0
Mrpl51	0	0.725646	0.849	0.348	0
Rpl8	0	0.724791	0.942	0.694	0
Retn	0	0.719427	0.241	0.012	0
Cdkn3	0	0.71803	0.384	0.01	0
Bola3	0	0.717844	0.814	0.309	0
Rpl3	0	0.716836	0.949	0.695	0
Ppp1r1a	0	0.715889	0.45	0.034	0
Rps27l	0	0.715864	0.904	0.533	0
Atp5g1	0	0.714267	0.886	0.521	0
Rpl14	0	0.712728	0.945	0.678	0
Lipe	0	0.71015	0.519	0.081	0
Tomm22	0	0.709329	0.839	0.391	0
Nt5dc2	0	0.709268	0.578	0.057	0
Reep6	0	0.701848	0.494	0.044	0
Ndufb8	0	0.700917	0.839	0.442	0
Rpl19	0	0.700534	0.952	0.699	0
Hmgn2	0	0.699794	0.691	0.141	0
Slc25a10	0	0.699414	0.555	0.055	0
Mrps36	0	0.697046	0.751	0.256	0
Hnrnpab	0	0.694	0.876	0.374	0
Fh1	0	0.692918	0.682	0.168	0
Cebpb	0	0.691708	0.801	0.411	0
Ppp1r14b	0	0.690471	0.817	0.334	0
Racgap1	0	0.689267	0.398	0.012	0
Ndufs2	0	0.688362	0.786	0.365	0
Tmem120a	0	0.686475	0.56	0.11	0
Lrrc59	0	0.682779	0.784	0.221	0
Mrps16	0	0.682718	0.803	0.313	0
Atp5g2	0	0.680087	0.917	0.533	0
Mmd	0	0.679471	0.56	0.075	0
Txn2	0	0.677656	0.818	0.364	0
Npm3	0	0.673178	0.785	0.239	0
Gins2	0	0.672553	0.478	0.028	0
Vdac2	0	0.671092	0.839	0.425	0
Rps3	0	0.66897	0.955	0.729	0
Naca	0	0.667672	0.932	0.653	0
Hnrnpa2b1	0	0.666296	0.921	0.554	0
Cenpw	0	0.66464	0.493	0.022	0
Pa2g4	0	0.663979	0.76	0.239	0
Pebp1	0	0.663596	0.887	0.528	0
Lsm4	0	0.662451	0.868	0.362	0
Lyar	0	0.660844	0.718	0.182	0
Acat1	0	0.660672	0.819	0.353	0
Nap1l1	0	0.660536	0.873	0.433	0
Nnmt	0	0.659715	0.761	0.309	0
Rpl13a	0	0.659115	0.889	0.572	0
Btf3	0	0.658696	0.919	0.634	0
Cox7a1	0	0.658302	0.362	0.058	0
Esco2	0	0.65573	0.343	0.004	0
Snrpf	0	0.655002	0.864	0.398	0
Mxd3	0	0.653382	0.325	0.006	0
Minos1	0	0.6525	0.842	0.488	0
Ndufaf4	0	0.651734	0.621	0.13	0
2022-03-05	0	0.65019	0.82	0.289	0
Siva1	0	0.646604	0.763	0.238	0
Ndufa10	0	0.644189	0.783	0.291	0
Tufm	0	0.644072	0.616	0.124	0
Dnajc15	0	0.643913	0.712	0.208	0
Suclg1	0	0.643584	0.718	0.337	0
Prmt1	0	0.641996	0.776	0.269	0
Atad3a	0	0.640254	0.557	0.078	0
Etfa	0	0.637824	0.776	0.399	0
Emc6	0	0.636647	0.742	0.229	0
Rpl12	0	0.635677	0.922	0.624	0
Gsto1	0	0.635004	0.66	0.143	0
Eef1b2	0	0.634966	0.922	0.603	0
Mrpl34	0	0.629529	0.697	0.222	0
Timm10	0	0.628013	0.589	0.117	0
Snrpe	0	0.625582	0.881	0.433	0
Idh2	0	0.624744	0.815	0.295	0
Fkbp4	0	0.624473	0.759	0.242	0
Rps8	0	0.623304	0.934	0.653	0
Timm17a	0	0.622712	0.813	0.33	0
Dnajc9	0	0.62224	0.603	0.087	0
Ckap2l	0	0.62163	0.339	0.006	0
Timm9	0	0.618548	0.602	0.11	0
Cct3	0	0.618491	0.796	0.303	0
Dlat	0	0.617713	0.569	0.11	0
Rps9	0	0.616877	0.938	0.666	0
Hist1h1e	0	0.616094	0.305	0.035	0
Lmnb1	0	0.615843	0.476	0.041	0
Gapdh	0	0.615046	0.825	0.364	0
Atpaf2	0	0.611932	0.511	0.064	0
Eci1	0	0.610741	0.669	0.218	0
Cmc2	0	0.610726	0.644	0.112	0
Pabpc1	0	0.609865	0.918	0.549	0
Tmpo	0	0.609012	0.66	0.168	0
Rpl6	0	0.608985	0.948	0.718	0
Rpl32	0	0.607171	0.958	0.727	0
Ndufs5	0	0.604382	0.83	0.475	0
Nudt19	0	0.603045	0.62	0.121	0
Rpl41	0	0.602448	0.942	0.611	0
Asf1b	0	0.598667	0.397	0.01	0
Pgp	0	0.596871	0.733	0.199	0
Alyref	0	0.596655	0.715	0.18	0
Mrpl15	0	0.595235	0.718	0.209	0
Uhrf1	0	0.592505	0.384	0.012	0
Nop10	0	0.59212	0.827	0.436	0
Rps6	0	0.592115	0.954	0.716	0
Oaz1	0	0.5913	0.951	0.668	0
Ndufs3	0	0.590181	0.789	0.387	0
Higd1a	0	0.588765	0.774	0.307	0
Cdkn2c	0	0.587415	0.5	0.074	0
Ndufc1	0	0.581857	0.829	0.423	0
Lig1	0	0.581023	0.423	0.038	0
Rfc4	0	0.580568	0.482	0.043	0
Rpl24	0	0.580244	0.952	0.708	0
Hnrnpu	0	0.579364	0.901	0.497	0
Dek	0	0.577937	0.797	0.345	0
Tst	0	0.577615	0.476	0.066	0
Hmgb1	0	0.576537	0.883	0.493	0
Ldhb	0	0.576422	0.693	0.239	0
Cct5	0	0.575506	0.842	0.445	0
Tmem147	0	0.574458	0.784	0.364	0
1110008F13Rik	0	0.572706	0.817	0.404	0
Cct2	0	0.571765	0.792	0.298	0
Rpl7	0	0.571757	0.931	0.681	0
Hist1h1b	0	0.571576	0.223	0.002	0
Acadl	0	0.571315	0.718	0.258	0
Samm50	0	0.568982	0.691	0.22	0
Ccdc34	0	0.568155	0.652	0.163	0
Mcm7	0	0.567845	0.479	0.05	0
Snu13	0	0.566404	0.848	0.424	0
Plk1	0	0.562287	0.307	0.006	0
Prelid3b	0	0.56199	0.668	0.154	0
Eif1ad	0	0.561805	0.568	0.097	0
Ezh2	0	0.561233	0.476	0.056	0
Apex1	0	0.56097	0.632	0.138	0
Naa10	0	0.560715	0.666	0.169	0
Mrpl30	0	0.559892	0.842	0.385	0
Rps5	0	0.55953	0.95	0.718	0
Fkbp3	0	0.558787	0.815	0.332	0
Pgls	0	0.558416	0.822	0.387	0
Mcm5	0	0.556833	0.401	0.021	0
Chchd3	0	0.556595	0.716	0.233	0
Ppa1	0	0.553164	0.724	0.219	0
Rps27a	0	0.551669	0.955	0.712	0
Rpl4	0	0.551306	0.936	0.693	0
Gpx4	0	0.550857	0.937	0.626	0
Mrpl28	0	0.549741	0.775	0.247	0
Rps13	0	0.549739	0.942	0.674	0
Reep5	0	0.549503	0.893	0.529	0
Anln	0	0.547534	0.336	0.01	0
Mcm6	0	0.546475	0.43	0.055	0
Eif1ax	0	0.54576	0.793	0.279	0
1700037H04Rik	0	0.543927	0.477	0.061	0
Tomm70a	0	0.543284	0.651	0.153	0
Usmg5	0	0.542761	0.773	0.392	0
Rpl28	0	0.541943	0.938	0.675	0
Atp5k	0	0.541418	0.712	0.264	0
Knl1	0	0.540905	0.314	0.004	0
Tmem14c	0	0.540615	0.834	0.408	0
Sdhc	0	0.540308	0.768	0.29	0
Dgat1	0	0.538777	0.456	0.07	0
Rps17	0	0.538588	0.947	0.721	0
Pdhb	0	0.538399	0.642	0.203	0
Nolc1	0	0.538298	0.631	0.149	0
Tacc3	0	0.53783	0.359	0.014	0
Chchd4	0	0.53529	0.54	0.085	0
Polr1d	0	0.535039	0.864	0.498	0
U2af1	0	0.534077	0.835	0.378	0
Idh3b	0	0.533673	0.699	0.254	0
Tmem70	0	0.531749	0.619	0.15	0
Slc36a2	0	0.531032	0.333	0.018	0
Mrps7	0	0.530901	0.714	0.21	0
Aspm	0	0.53017	0.283	0.004	0
Ckap2	0	0.528744	0.282	0.007	0
Rpl29	0	0.527757	0.916	0.657	0
Coq7	0	0.527053	0.616	0.118	0
Rps16	0	0.525782	0.952	0.737	0
Hells	0	0.525579	0.329	0.015	0
Rangap1	0	0.525514	0.515	0.066	0
Ifrd2	0	0.524377	0.498	0.063	0
Anp32e	0	0.520873	0.68	0.168	0
Mrpl55	0	0.520479	0.686	0.194	0
Aurkb	0	0.520462	0.304	0.008	0
Rpl18a	0	0.520385	0.944	0.72	0
Mad2l1	0	0.518211	0.39	0.018	0
Rfc5	0	0.517948	0.438	0.036	0
Kif22	0	0.515087	0.298	0.005	0
Pole3	0	0.514504	0.671	0.156	0
Tkt	0	0.51448	0.735	0.316	0
Psmb2	0	0.514352	0.889	0.546	0
Cidec	0	0.514352	0.255	0.014	0
Ssrp1	0	0.513155	0.767	0.263	0
Ybx1	0	0.512172	0.946	0.685	0
Poldip2	0	0.511435	0.694	0.192	0
Vegfb	0	0.511371	0.522	0.08	0
Prdx3	0	0.511122	0.72	0.237	0
Lsm5	0	0.511007	0.72	0.212	0
Ghitm	0	0.510511	0.782	0.344	0
Rps19	0	0.507854	0.955	0.712	0
Pcx	0	0.507075	0.381	0.027	0
Cct8	0	0.5044	0.777	0.336	0
Pfdn6	0	0.504088	0.769	0.263	0
Nasp	0	0.503184	0.608	0.143	0
Atad2	0	0.502979	0.427	0.05	0
Rps10	0	0.502355	0.931	0.651	0
Fuom	0	0.502201	0.511	0.087	0
Ptges3	0	0.499585	0.809	0.32	0
Rpl22l1	0	0.499026	0.937	0.631	0
Gcsh	0	0.497849	0.651	0.166	0
Slc25a19	0	0.497472	0.411	0.059	0
Rps11	0	0.49708	0.948	0.717	0
Comtd1	0	0.495525	0.485	0.072	0
Psma4	0	0.494906	0.869	0.491	0
Mrpl17	0	0.493013	0.835	0.343	0
Ndufa5	0	0.492401	0.794	0.395	0
G3bp1	0	0.492214	0.814	0.344	0
Hadha	0	0.491081	0.649	0.221	0
Rps3a1	0	0.49035	0.953	0.718	0
Mrto4	0	0.489612	0.539	0.105	0
Usp1	0	0.489562	0.602	0.137	0
Nusap1	0	0.489325	0.262	0.008	0
Adrb3	0	0.489058	0.258	0.006	0
Gm45716	0	0.488818	0.353	0.022	0
Mrps17	0	0.488535	0.793	0.29	0
Kif20b	0	0.488335	0.285	0.009	0
Tcf19	0	0.488154	0.33	0.026	0
Ap3s1	0	0.487739	0.845	0.37	0
Rpl27a	0	0.486664	0.95	0.737	0
Dhfr	0	0.486547	0.385	0.03	0
Prps1	0	0.486349	0.489	0.074	0
Dlst	0	0.486146	0.562	0.129	0
Nop56	0	0.485804	0.653	0.192	0
Kif20a	0	0.483014	0.285	0.005	0
Incenp	0	0.48292	0.314	0.016	0
Kmt5a	0	0.481234	0.537	0.093	0
Dgat2	0	0.481017	0.298	0.032	0
Lsm3	0	0.480598	0.709	0.213	0
Pnpla2	0	0.479966	0.548	0.17	0
Rsl1d1	0	0.476752	0.695	0.213	0
Cct7	0	0.476054	0.811	0.365	0
Mrpl35	0	0.474972	0.697	0.195	0
Orc6	0	0.474836	0.586	0.13	0
Hat1	0	0.473291	0.472	0.071	0
Stip1	0	0.471641	0.58	0.12	0
Aurka	0	0.471363	0.275	0.006	0
Nop58	0	0.471327	0.729	0.246	0
Gadd45gip1	0	0.470225	0.739	0.238	0
Nuf2	0	0.469276	0.286	0.004	0
Banf1	0	0.469109	0.815	0.301	0
Snrpb	0	0.469096	0.881	0.528	0
Sgo2a	0	0.468617	0.284	0.005	0
Mrps26	0	0.468594	0.71	0.237	0
Nudc	0	0.466773	0.8	0.336	0
Lman2	0	0.464347	0.825	0.372	0
Atp1a2	0	0.462908	0.557	0.163	0
Glrx3	0	0.462607	0.84	0.398	0
Psma5	0	0.461835	0.868	0.452	0
Mthfd2	0	0.461474	0.435	0.062	0
Apoo	0	0.461341	0.484	0.086	0
Aco1	0	0.461275	0.556	0.117	0
Psmb3	0	0.461057	0.839	0.462	0
Ube2m	0	0.460876	0.739	0.23	0
Hmgn5	0	0.460329	0.519	0.092	0
Acp1	0	0.460091	0.829	0.335	0
Gmps	0	0.459473	0.575	0.134	0
Cenpq	0	0.459404	0.33	0.016	0
Rfc2	0	0.459316	0.559	0.116	0
Mrps5	0	0.457373	0.594	0.139	0
Dld	0	0.456893	0.628	0.174	0
Lgals12	0	0.456799	0.333	0.012	0
Idh3g	0	0.456765	0.725	0.287	0
Hist1h4i	0	0.45612	0.343	0.025	0
Kpnb1	0	0.454384	0.673	0.173	0
Mcm3	0	0.454033	0.39	0.043	0
Eif2s1	0	0.453866	0.7	0.202	0
Pabpc4	0	0.452675	0.557	0.118	0
Fxn	0	0.451053	0.458	0.064	0
Psat1	0	0.450444	0.478	0.071	0
Eef1e1	0	0.45033	0.498	0.086	0
Ppp1ca	0	0.449498	0.876	0.548	0
Rrs1	0	0.449393	0.568	0.132	0
Mrps14	0	0.447083	0.83	0.418	0
Mrpl36	0	0.446718	0.737	0.268	0
Mrpl21	0	0.446241	0.697	0.219	0
Mrps12	0	0.445822	0.769	0.268	0
Hspa4	0	0.44529	0.68	0.205	0
Ppargc1b	0	0.443298	0.319	0.021	0
Ddx39	0	0.443256	0.567	0.11	0
Gpi1	0	0.442625	0.767	0.355	0
Kif11	0	0.442055	0.267	0.004	0
Fitm2	0	0.441704	0.427	0.059	0
Cat	0	0.441534	0.62	0.192	0
Mrps34	0	0.440703	0.67	0.22	0
Atp5g3	0	0.439889	0.854	0.464	0
Anapc15	0	0.437495	0.456	0.058	0
Gspt1	0	0.436594	0.74	0.249	0
Cmbl	0	0.436244	0.57	0.147	0
Rnaseh2c	0	0.435312	0.763	0.254	0
Rpa3	0	0.435264	0.652	0.172	0
Eif3i	0	0.435227	0.86	0.467	0
Mis18bp1	0	0.43493	0.247	0.004	0
Gfer	0	0.434446	0.527	0.098	0
Gemin6	0	0.434083	0.421	0.05	0
Pdap1	0	0.431162	0.819	0.348	0
Rbbp7	0	0.429785	0.811	0.342	0
C330027C09Rik	0	0.429435	0.282	0.006	0
Rpa2	0	0.427872	0.411	0.061	0
Gnpat	0	0.426646	0.496	0.095	0
Mrps18b	0	0.425801	0.54	0.108	0
Ppil1	0	0.425061	0.505	0.083	0
Arl4a	0	0.424608	0.678	0.294	0
Lap3	0	0.424578	0.629	0.178	0
Coq9	0	0.424074	0.504	0.117	0
Ppif	0	0.423949	0.374	0.038	0
Ung	0	0.423613	0.274	0.018	0
Eif3l	0	0.422213	0.735	0.26	0
Naa20	0	0.421685	0.774	0.295	0
Ola1	0	0.421604	0.626	0.174	0
Fam213a	0	0.421083	0.326	0.043	0
Ndufb3	0	0.420884	0.79	0.39	0
Ptges2	0	0.419087	0.43	0.064	0
Dpy30	0	0.418616	0.699	0.214	0
Mrps25	0	0.418576	0.632	0.164	0
Srsf7	0	0.418038	0.745	0.305	0
Dkc1	0	0.416237	0.518	0.112	0
Mrpl47	0	0.416164	0.433	0.068	0
Mrpl41	0	0.415644	0.628	0.178	0
Fam96a	0	0.414998	0.685	0.194	0
Diaph3	0	0.413738	0.253	0.008	0
Haus4	0	0.412438	0.394	0.043	0
Fcor	0	0.411706	0.277	0.016	0
Coq5	0	0.411116	0.434	0.074	0
Car13	0	0.410571	0.442	0.071	0
Uchl3	0	0.409082	0.6	0.143	0
Metap2	0	0.409068	0.83	0.353	0
Impdh2	0	0.408738	0.765	0.316	0
Dynll2	0	0.408532	0.733	0.244	0
Fbl	0	0.408388	0.692	0.23	0
Ncapg	0	0.408079	0.243	0.003	0
Phf5a	0	0.407482	0.723	0.224	0
Rad51ap1	0	0.407458	0.274	0.007	0
Cyb5b	0	0.40677	0.634	0.171	0
Kif23	0	0.406288	0.217	0.01	0
Nudt5	0	0.406264	0.544	0.109	0
Slc25a11	0	0.405407	0.664	0.222	0
Nudt21	0	0.405181	0.736	0.243	0
Tipin	0	0.404755	0.588	0.16	0
Nudcd2	0	0.404543	0.707	0.219	0
Hibch	0	0.403005	0.401	0.063	0
Ddt	0	0.402288	0.689	0.265	0
Mbd3	0	0.401927	0.749	0.278	0
Bckdhb	0	0.401401	0.44	0.072	0
Emc9	0	0.400746	0.52	0.116	0
Eprs	0	0.400592	0.807	0.338	0
Rangrf	0	0.399842	0.449	0.077	0
Isoc1	0	0.399132	0.467	0.086	0
Mrpl32	0	0.398617	0.718	0.23	0
Psmb7	0	0.398085	0.818	0.385	0
Sfxn1	0	0.395988	0.815	0.372	0
Srsf1	0	0.395505	0.638	0.177	0
1700021F05Rik	0	0.392483	0.573	0.14	0
Mrps15	0	0.390886	0.716	0.225	0
Adipor2	0	0.39022	0.516	0.123	0
Snrpd2	0	0.388164	0.85	0.454	0
Mrps22	0	0.387155	0.401	0.054	0
Ybx3	0	0.386709	0.814	0.394	0
Hibadh	0	0.38651	0.679	0.247	0
BC003965	0	0.386502	0.581	0.148	0
Mrps35	0	0.386213	0.505	0.111	0
Gnl3	0	0.386099	0.618	0.193	0
Mrpl2	0	0.385605	0.606	0.16	0
Snrpd3	0	0.385588	0.757	0.306	0
Pycrl	0	0.384847	0.473	0.089	0
Mrps33	0	0.384367	0.824	0.415	0
Jagn1	0	0.384281	0.587	0.168	0
Phb	0	0.383946	0.558	0.142	0
Slc1a3	0	0.38388	0.51	0.124	0
Adam12	0	0.383156	0.557	0.135	0
0610012G03Rik	0	0.381722	0.775	0.339	0
Ruvbl2	0	0.381203	0.478	0.091	0
Dhrs4	0	0.380945	0.624	0.168	0
Mrpl38	0	0.380824	0.555	0.132	0
Mrps18a	0	0.380792	0.758	0.297	0
Clspn	0	0.380071	0.258	0.01	0
Wdr18	0	0.379774	0.546	0.122	0
Sdha	0	0.379304	0.744	0.334	0
Fam136a	0	0.378817	0.484	0.099	0
Ndufa9	0	0.378728	0.648	0.231	0
Mrps6	0	0.378727	0.615	0.167	0
C1qtnf12	0	0.378447	0.632	0.183	0
Pank3	0	0.378049	0.43	0.086	0
Mrpl11	0	0.377766	0.624	0.178	0
Hnrnpc	0	0.377684	0.837	0.404	0
Hpf1	0	0.377614	0.602	0.162	0
Snrpa1	0	0.377409	0.648	0.184	0
Mtx2	0	0.377312	0.634	0.179	0
Depdc1a	0	0.377017	0.22	0.002	0
Nsd2	0	0.376212	0.371	0.053	0
Fam13a	0	0.375901	0.302	0.062	0
Parp1	0	0.375677	0.459	0.079	0
Mrpl57	0	0.375646	0.731	0.257	0
Shmt1	0	0.375323	0.291	0.008	0
Strap	0	0.375147	0.752	0.284	0
Prim1	0	0.375129	0.323	0.026	0
Coa3	0	0.375019	0.824	0.395	0
Vars	0	0.374978	0.48	0.085	0
Aifm2	0	0.374853	0.327	0.047	0
Wdr12	0	0.374815	0.418	0.066	0
Ogdh	0	0.373588	0.6	0.183	0
Lsm6	0	0.373559	0.774	0.289	0
Sae1	0	0.373115	0.623	0.182	0
Syce2	0	0.373052	0.323	0.023	0
Cd320	0	0.372877	0.524	0.121	0
Psph	0	0.37249	0.448	0.083	0
Bub1b	0	0.372268	0.252	0.005	0
Cpt2	0	0.372237	0.43	0.092	0
Clpp	0	0.371991	0.665	0.217	0
Ak6	0	0.371622	0.552	0.128	0
Timm44	0	0.371431	0.493	0.105	0
Stard7	0	0.371279	0.474	0.093	0
Uck1	0	0.371265	0.477	0.112	0
Pde3b	0	0.37082	0.328	0.031	0
Ccdc58	0	0.370423	0.464	0.089	0
Abhd5	0	0.370314	0.5	0.121	0
Txnl4a	0	0.370185	0.65	0.2	0
Hsd17b10	0	0.369917	0.758	0.317	0
Mcm2	0	0.369617	0.292	0.022	0
Lsm12	0	0.369133	0.647	0.178	0
Ndufv1	0	0.368377	0.707	0.275	0
Ipo5	0	0.368124	0.511	0.103	0
Ndufs8	0	0.367475	0.753	0.311	0
Ccne1	0	0.366657	0.268	0.01	0
Denr	0	0.366556	0.756	0.289	0
Cenpk	0	0.364592	0.257	0.009	0
Pop5	0	0.364551	0.625	0.209	0
1110008P14Rik	0	0.363221	0.525	0.168	0
Dbf4	0	0.362367	0.269	0.016	0
Slc19a1	0	0.362129	0.324	0.031	0
Sucla2	0	0.361858	0.603	0.209	0
Pin1	0	0.361267	0.736	0.26	0
Ncapg2	0	0.359875	0.277	0.016	0
Tmem97	0	0.358606	0.526	0.122	0
Caprin1	0	0.358486	0.711	0.244	0
Eny2	0	0.358065	0.816	0.372	0
Gar1	0	0.357407	0.611	0.173	0
Sssca1	0	0.356833	0.544	0.124	0
Mrpl19	0	0.356446	0.438	0.078	0
Cdv3	0	0.356034	0.702	0.237	0
Fam111a	0	0.355389	0.466	0.119	0
Rad21	0	0.35381	0.559	0.167	0
Rcc2	0	0.353743	0.431	0.073	0
Pold2	0	0.353046	0.452	0.085	0
Shcbp1	0	0.352524	0.226	0.004	0
Tfdp1	0	0.3524	0.442	0.083	0
Bcat2	0	0.352291	0.474	0.104	0
Chchd1	0	0.352228	0.791	0.341	0
Dnaja3	0	0.351564	0.444	0.09	0
Stoml2	0	0.351388	0.667	0.216	0
Mrpl49	0	0.351041	0.502	0.096	0
Mrpl3	0	0.350956	0.509	0.118	0
Psmg1	0	0.350744	0.482	0.11	0
Ndc1	0	0.350321	0.315	0.022	0
Prlr	0	0.350094	0.252	0.019	0
Fen1	0	0.349804	0.282	0.023	0
Etfdh	0	0.349393	0.466	0.115	0
Paics	0	0.349335	0.635	0.196	0
Plk4	0	0.348868	0.285	0.021	0
Afg3l2	0	0.348117	0.41	0.078	0
Tsfm	0	0.346996	0.565	0.147	0
Sephs2	0	0.346595	0.428	0.079	0
Hnrnpd	0	0.345943	0.668	0.245	0
Cenpn	0	0.345297	0.255	0.007	0
Zfp91	0	0.344958	0.697	0.249	0
Sf3b5	0	0.344059	0.826	0.399	0
Cenpp	0	0.343794	0.253	0.007	0
Fam162a	0	0.343377	0.807	0.388	0
Mrps11	0	0.343235	0.557	0.137	0
Tardbp	0	0.342523	0.611	0.168	0
Nxt1	0	0.342492	0.477	0.112	0
Psmc3ip	0	0.342188	0.293	0.018	0
Mpp6	0	0.341709	0.483	0.098	0
Ephx2	0	0.339949	0.439	0.108	0
Chaf1a	0	0.339472	0.255	0.014	0
Emc8	0	0.339135	0.604	0.161	0
Mlec	0	0.33882	0.773	0.283	0
Eif4g1	0	0.338256	0.741	0.29	0
Apoc1	0	0.337703	0.31	0.076	0
Topbp1	0	0.336046	0.368	0.054	0
Psip1	0	0.335528	0.693	0.257	0
Cenph	0	0.335224	0.238	0.004	0
Rfc1	0	0.334361	0.593	0.176	0
Ubl4a	0	0.334161	0.633	0.186	0
Mtfp1	0	0.333941	0.261	0.015	0
Mrps23	0	0.333736	0.559	0.147	0
Mrpl45	0	0.333636	0.471	0.103	0
Mrps30	0	0.332586	0.539	0.13	0
Eloc	0	0.332412	0.833	0.405	0
Smoc1	0	0.33229	0.28	0.029	0
Ncapd2	0	0.332262	0.273	0.017	0
Dnajc19	0	0.332226	0.776	0.321	0
Cops6	0	0.332155	0.793	0.336	0
Cdca2	0	0.331965	0.218	0.004	0
Cib2	0	0.331503	0.245	0.044	0
Gpatch4	0	0.331052	0.408	0.08	0
Qdpr	0	0.331023	0.596	0.187	0
Got2	0	0.330675	0.553	0.158	0
Ptcd3	0	0.330616	0.353	0.048	0
Impa2	0	0.330321	0.314	0.03	0
Nop16	0	0.330177	0.456	0.094	0
Rpa1	0	0.330024	0.398	0.063	0
Psme3	0	0.329533	0.484	0.104	0
Crls1	0	0.329215	0.45	0.093	0
Ect2	0	0.329201	0.205	0.003	0
Pgm2	0	0.328946	0.53	0.145	0
Eif4e2	0	0.328711	0.719	0.26	0
Cisd2	0	0.328122	0.759	0.284	0
Sgta	0	0.327988	0.704	0.258	0
Mrps10	0	0.327648	0.552	0.14	0
Mrpl16	0	0.326728	0.457	0.1	0
Rad51	0	0.326221	0.224	0.005	0
Dbt	0	0.326086	0.385	0.065	0
Itpk1	0	0.325449	0.398	0.067	0
Ddx39b	0	0.324588	0.727	0.299	0
Dazap1	0	0.324543	0.708	0.24	0
Letm1	0	0.323995	0.498	0.13	0
Pfkl	0	0.323098	0.467	0.098	0
Mrpl13	0	0.322492	0.699	0.225	0
Dnph1	0	0.322186	0.249	0.011	0
Lpgat1	0	0.321746	0.471	0.112	0
Pdha1	0	0.321198	0.645	0.244	0
Traf4	0	0.320306	0.506	0.126	0
Rabggtb	0	0.320278	0.534	0.142	0
Exosc8	0	0.320039	0.524	0.126	0
Syncrip	0	0.319827	0.691	0.238	0
Rgcc	0	0.319777	0.645	0.246	0
Cdt1	0	0.319689	0.25	0.016	0
Jpt2	0	0.319449	0.318	0.043	0
Zfp106	0	0.319149	0.575	0.177	0
Cbx5	0	0.318991	0.581	0.176	0
Ndufaf6	0	0.317766	0.362	0.052	0
Bscl2	0	0.317759	0.619	0.2	0
Hirip3	0	0.317558	0.3	0.038	0
Taf10	0	0.31703	0.726	0.265	0
Itpa	0	0.316839	0.529	0.137	0
Lsm8	0	0.315371	0.645	0.215	0
Nrm	0	0.315155	0.321	0.039	0
Cenps	0	0.314289	0.24	0.009	0
Gfm1	0	0.314158	0.377	0.063	0
Mrpl22	0	0.313949	0.534	0.133	0
Itgb3bp	0	0.313602	0.424	0.084	0
Uchl5	0	0.312059	0.464	0.093	0
Cnih4	0	0.311278	0.759	0.293	0
Mcm4	0	0.311235	0.303	0.041	0
Fabp4	0	0.310916	0.687	0.297	0
Arhgap11a	0	0.309802	0.209	0.007	0
Atic	0	0.309751	0.457	0.105	0
Abhd11	0	0.309452	0.522	0.141	0
Melk	0	0.309352	0.21	0.003	0
Odc1	0	0.309019	0.617	0.183	0
Ssbp1	0	0.308695	0.679	0.229	0
Slc25a39	0	0.307937	0.574	0.177	0
Gm47283	0	0.307508	0.528	0.145	0
Snhg6	0	0.306695	0.574	0.191	0
Haus8	0	0.306498	0.342	0.042	0
Isca2	0	0.306288	0.509	0.131	0
Tmem126a	0	0.306271	0.681	0.241	0
Ebna1bp2	0	0.305696	0.67	0.238	0
Hacd2	0	0.304952	0.577	0.18	0
Ndufs1	0	0.304438	0.494	0.125	0
Pradc1	0	0.303937	0.4	0.071	0
Pcna	0	0.303209	0.365	0.068	0
Ahsa1	0	0.302993	0.625	0.205	0
Med9	0	0.300929	0.491	0.117	0
Cenpx	0	0.300847	0.739	0.277	0
Gtf3a	0	0.300556	0.599	0.179	0
Pole4	0	0.299981	0.655	0.207	0
Noc2l	0	0.299081	0.39	0.073	0
Timm22	0	0.299054	0.563	0.143	0
Tmem11	0	0.298973	0.605	0.183	0
Aurkaip1	0	0.298493	0.793	0.353	0
Hsph1	0	0.298228	0.374	0.077	0
Mrpl37	0	0.298051	0.398	0.077	0
Txnrd1	0	0.297404	0.556	0.154	0
Thyn1	0	0.297382	0.413	0.074	0
Lzic	0	0.297009	0.386	0.068	0
Ppm1g	0	0.295682	0.57	0.161	0
Hdhd2	0	0.294539	0.493	0.124	0
Ubac1	0	0.294389	0.43	0.091	0
Prkaca	0	0.293096	0.539	0.151	0
Ppid	0	0.292355	0.549	0.169	0
Ipo7	0	0.292246	0.425	0.086	0
Hsd17b12	0	0.292095	0.601	0.181	0
Pdhx	0	0.290942	0.309	0.043	0
Dnmt1	0	0.290503	0.318	0.048	0
Mrpl14	0	0.290472	0.777	0.331	0
Acads	0	0.290186	0.516	0.153	0
Snrnp25	0	0.289955	0.421	0.076	0
Ube2t	0	0.289528	0.204	0.007	0
Cinp	0	0.289503	0.443	0.101	0
4931406C07Rik	0	0.288611	0.374	0.09	0
Trp53	0	0.288588	0.657	0.226	0
Cox19	0	0.288508	0.543	0.156	0
Smarcc1	0	0.288277	0.497	0.131	0
Dohh	0	0.288123	0.562	0.152	0
Rpl7l1	0	0.287538	0.614	0.2	0
Cops3	0	0.287486	0.531	0.147	0
Tmem37	0	0.287151	0.325	0.055	0
Cdca7	0	0.286047	0.252	0.021	0
Akap1	0	0.285602	0.312	0.044	0
Kars	0	0.285439	0.535	0.148	0
Ciapin1	0	0.284979	0.433	0.093	0
Trip13	0	0.284398	0.211	0.007	0
Rcc1	0	0.28425	0.276	0.029	0
Mrpl54	0	0.283817	0.761	0.326	0
Mrpl50	0	0.283477	0.528	0.134	0
Ywhag	0	0.283338	0.626	0.201	0
Dctd	0	0.282489	0.248	0.023	0
Fam69b	0	0.282248	0.354	0.081	0
Adhfe1	0	0.282002	0.279	0.045	0
A530016L24Rik	0	0.281656	0.217	0.01	0
Gtpbp4	0	0.280623	0.553	0.164	0
2310061I04Rik	0	0.27987	0.313	0.053	0
Dnajc2	0	0.279315	0.52	0.141	0
Mrpl40	0	0.279103	0.565	0.173	0
Cox18	0	0.2791	0.374	0.068	0
Mecr	0	0.278867	0.352	0.061	0
Gps1	0	0.278799	0.599	0.201	0
Gale	0	0.278562	0.232	0.015	0
D10Jhu81e	0	0.277976	0.549	0.176	0
Ncaph2	0	0.277167	0.499	0.129	0
Grb14	0	0.276842	0.371	0.086	0
Pdss1	0	0.276654	0.253	0.018	0
Tmx2	0	0.276168	0.47	0.109	0
Tubg1	0	0.276013	0.348	0.054	0
Ppih	0	0.275773	0.35	0.053	0
Wdr77	0	0.275089	0.402	0.082	0
Hccs	0	0.27408	0.378	0.064	0
Cenpv	0	0.273976	0.352	0.071	0
Pgd	0	0.273848	0.532	0.162	0
Srsf6	0	0.273789	0.736	0.316	0
Nup43	0	0.273457	0.273	0.031	0
Pex16	0	0.273103	0.402	0.092	0
Fam216a	0	0.272138	0.421	0.097	0
Mrpl46	0	0.271395	0.45	0.104	0
Mrpl9	0	0.271179	0.489	0.136	0
Noct	0	0.270953	0.285	0.043	0
Eif3b	0	0.270379	0.659	0.22	0
Gins4	0	0.270134	0.429	0.1	0
4930579G24Rik	0	0.269401	0.234	0.025	0
Trap1	0	0.26921	0.458	0.113	0
Rnf126	0	0.268613	0.452	0.105	0
Thop1	0	0.268517	0.319	0.053	0
Slc25a51	0	0.268376	0.535	0.173	0
Txnl1	0	0.268066	0.756	0.313	0
Ddx21	0	0.267113	0.455	0.117	0
Rbm17	0	0.265974	0.665	0.232	0
Dnaja2	0	0.26575	0.743	0.302	0
Sac3d1	0	0.265728	0.415	0.087	0
Dcun1d5	0	0.265549	0.761	0.317	0
Aifm1	0	0.265359	0.362	0.067	0
Ube2a	0	0.265176	0.647	0.212	0
Nifk	0	0.265028	0.428	0.096	0
Tank	0	0.264497	0.424	0.098	0
Eif2b1	0	0.26391	0.421	0.092	0
Adsl	0	0.263616	0.432	0.096	0
Rfc3	0	0.263516	0.264	0.036	0
Exosc4	0	0.263513	0.57	0.179	0
Ptrh2	0	0.262876	0.405	0.089	0
Coq6	0	0.262254	0.333	0.05	0
Ss18l2	0	0.26217	0.482	0.128	0
Dhrs7b	0	0.261618	0.447	0.102	0
Letmd1	0	0.260749	0.285	0.053	0
Dot1l	0	0.260585	0.343	0.055	0
Srpk1	0	0.26038	0.576	0.162	0
Tfam	0	0.260026	0.443	0.102	0
Cd1d1	0	0.259867	0.236	0.03	0
Hspa14	0	0.259053	0.448	0.113	0
Mpdu1	0	0.258946	0.548	0.161	0
Hdac2	0	0.258825	0.633	0.216	0
Galk1	0	0.258805	0.551	0.184	0
Apip	0	0.258379	0.464	0.109	0
2810004N23Rik	0	0.258338	0.514	0.146	0
Hmbs	0	0.257517	0.49	0.123	0
Abce1	0	0.257511	0.469	0.117	0
Ube2f	0	0.257482	0.517	0.141	0
Gart	0	0.257299	0.369	0.071	0
Erh	0	0.256881	0.496	0.132	0
Dtl	0	0.256714	0.204	0.012	0
Shmt2	0	0.256425	0.362	0.069	0
Ncbp1	0	0.255505	0.33	0.059	0
Mak16	0	0.254921	0.435	0.102	0
Wdr75	0	0.254912	0.388	0.079	0
Smarca5	0	0.254712	0.728	0.287	0
Elof1	0	0.254415	0.712	0.274	0
Mgat4b	0	0.253507	0.537	0.153	0
Oxnad1	0	0.253154	0.29	0.046	0
Larp1b	0	0.253004	0.338	0.058	0
Timm21	0	0.252317	0.456	0.112	0
Exosc5	0	0.252025	0.492	0.131	0
Rnaseh2b	0	0.251636	0.363	0.078	0
Orc2	0	0.251574	0.299	0.048	0
Grsf1	0	0.25152	0.406	0.091	0
Rnps1	0	0.251067	0.544	0.157	0
Tmed5	0	0.250019	0.777	0.33	0
Ppan	0	0.248967	0.394	0.085	0
Pmpcb	0	0.248706	0.514	0.143	0
Gys1	0	0.248507	0.248	0.027	0
Fgfrl1	0	0.248285	0.344	0.067	0
Oxct1	0	0.248071	0.719	0.284	0
Rwdd4a	0	0.247826	0.42	0.093	0
Ubtf	0	0.246185	0.653	0.24	0
Pola1	0	0.24601	0.248	0.026	0
Ncapd3	0	0.245888	0.288	0.042	0
Ftsj3	0	0.245162	0.361	0.075	0
Cox10	0	0.242595	0.306	0.049	0
1190007I07Rik	0	0.242421	0.324	0.062	0
Ssna1	0	0.242155	0.684	0.269	0
Tex30	0	0.242068	0.309	0.045	0
Etf1	0	0.241609	0.61	0.204	0
Fzr1	0	0.241456	0.335	0.069	0
Pno1	0	0.241455	0.356	0.071	0
Car2	0	0.241419	0.202	0.02	0
Hjurp	0	0.240904	0.412	0.105	0
Nsun2	0	0.240848	0.493	0.142	0
Fam210a	0	0.24073	0.31	0.055	0
Cdc34	0	0.24036	0.432	0.101	0
Gars	0	0.239839	0.566	0.183	0
Retsat	0	0.239672	0.461	0.13	0
Rps19bp1	0	0.239371	0.486	0.126	0
Mrps27	0	0.238511	0.263	0.039	0
Usp14	0	0.238095	0.459	0.115	0
Pih1d1	0	0.237865	0.5	0.147	0
Rcl1	0	0.237533	0.429	0.102	0
Nubp1	0	0.237422	0.429	0.095	0
Hcar1	0	0.237386	0.214	0.016	0
Mtx1	0	0.235777	0.492	0.132	0
Htra2	0	0.234607	0.523	0.157	0
Aimp2	0	0.234064	0.437	0.111	0
Ppp2r1b	0	0.2332	0.268	0.038	0
Pbdc1	0	0.232866	0.551	0.181	0
Stk16	0	0.232466	0.562	0.172	0
Ecsit	0	0.232256	0.351	0.067	0
Grwd1	0	0.232083	0.292	0.046	0
Ipo9	0	0.232035	0.352	0.072	0
Metrn	0	0.231931	0.321	0.062	0
Pex13	0	0.231683	0.451	0.122	0
Ormdl3	0	0.231572	0.565	0.187	0
Ncbp2	0	0.231175	0.492	0.148	0
Pus1	0	0.231168	0.351	0.072	0
Pparg	0	0.230904	0.667	0.244	0
Mthfd1	0	0.230875	0.261	0.036	0
Nup37	0	0.230594	0.307	0.054	0
Dis3	0	0.2304	0.265	0.042	0
Thrap3	0	0.230345	0.665	0.252	0
Mybbp1a	0	0.230102	0.396	0.098	0
Foxred1	0	0.230061	0.307	0.052	0
Thoc3	0	0.229849	0.447	0.108	0
Wdr43	0	0.229766	0.39	0.093	0
Esrra	0	0.229726	0.32	0.062	0
Memo1	0	0.229531	0.341	0.077	0
Lsm1	0	0.229483	0.603	0.21	0
Mettl9	0	0.229436	0.693	0.27	0
Psmd3	0	0.229074	0.609	0.2	0
Ckap5	0	0.228972	0.332	0.079	0
H2afy	0	0.228936	0.711	0.274	0
Lage3	0	0.228914	0.65	0.236	0
Eif4e	0	0.227371	0.689	0.264	0
Oxld1	0	0.22686	0.272	0.047	0
Srsf10	0	0.226726	0.635	0.211	0
Larp7	0	0.225794	0.394	0.094	0
Slc5a3	0	0.225123	0.344	0.082	0
Ctps	0	0.224435	0.308	0.053	0
Larp1	0	0.224357	0.432	0.112	0
Psmd6	0	0.22408	0.693	0.276	0
Fubp1	0	0.223753	0.651	0.242	0
Hipk2	0	0.223746	0.238	0.029	0
Clybl	0	0.223683	0.275	0.055	0
Ptpa	0	0.223423	0.558	0.173	0
Txndc12	0	0.223218	0.517	0.161	0
Clns1a	0	0.223135	0.575	0.19	0
Pla2g12a	0	0.22223	0.403	0.107	0
H1fx	0	0.221546	0.249	0.051	0
Pex11a	0	0.221355	0.271	0.05	0
Chchd6	0	0.221125	0.426	0.107	0
Larp4	0	0.220246	0.42	0.103	0
Mis18a	0	0.220096	0.29	0.048	0
Haus1	0	0.219465	0.287	0.046	0
Rad50	0	0.219384	0.455	0.14	0
Pex14	0	0.218847	0.424	0.11	0
Opa1	0	0.21879	0.33	0.069	0
Mcts2	0	0.218207	0.283	0.05	0
Hras	0	0.217925	0.597	0.195	0
Yars2	0	0.217802	0.282	0.046	0
Slc16a1	0	0.217505	0.268	0.041	0
Taf1d	0	0.217494	0.543	0.175	0
Coq3	0	0.217442	0.256	0.04	0
Aoc3	0	0.217312	0.618	0.217	0
Carnmt1	0	0.216945	0.464	0.121	0
Uck2	0	0.216719	0.239	0.028	0
Nup50	0	0.215726	0.342	0.073	0
Asns	0	0.215708	0.327	0.076	0
Maz	0	0.215369	0.435	0.117	0
Mcur1	0	0.215343	0.486	0.144	0
Coq2	0	0.215202	0.58	0.185	0
Cmss1	0	0.21511	0.315	0.056	0
9130401M01Rik	0	0.214513	0.466	0.141	0
Mrps2	0	0.213755	0.242	0.031	0
Slc35b2	0	0.213479	0.623	0.225	0
Mrpl10	0	0.211841	0.424	0.109	0
Abcf1	0	0.211811	0.632	0.227	0
Mrpl43	0	0.211408	0.638	0.221	0
Clpb	0	0.211339	0.323	0.063	0
Nip7	0	0.210352	0.441	0.127	0
Rpp14	0	0.209708	0.441	0.118	0
Cse1l	0	0.209618	0.277	0.045	0
Ptcd2	0	0.209272	0.352	0.076	0
1110004E09Rik	0	0.209063	0.399	0.098	0
Abcf2	0	0.208984	0.362	0.087	0
Epb41l1	0	0.208815	0.392	0.105	0
Nadk	0	0.208687	0.6	0.21	0
Zmynd19	0	0.20837	0.23	0.034	0
Coa5	0	0.208268	0.383	0.098	0
Rbbp8	0	0.207277	0.252	0.044	0
Maip1	0	0.206729	0.388	0.097	0
Ivns1abp	0	0.206178	0.414	0.104	0
Nup62	0	0.205059	0.328	0.071	0
Bri3bp	0	0.204253	0.358	0.09	0
Alg8	0	0.2042	0.219	0.026	0
Pkmyt1	0	0.20417	0.208	0.026	0
Tcerg1	0	0.204073	0.478	0.135	0
Mrps9	0	0.204036	0.414	0.109	0
Tlcd1	0	0.203948	0.332	0.081	0
Baz1a	0	0.203162	0.445	0.117	0
Sik2	0	0.20316	0.263	0.046	0
Rnf5	0	0.203088	0.492	0.142	0
Tysnd1	0	0.202937	0.31	0.067	0
Rmnd1	0	0.202829	0.267	0.05	0
Ndufaf5	0	0.202602	0.242	0.037	0
Psmd14	0	0.202452	0.59	0.201	0
Ddx1	0	0.202312	0.531	0.172	0
Mrpl58	0	0.201411	0.654	0.242	0
Pold1	0	0.201289	0.211	0.024	0
Parl	0	0.200582	0.534	0.173	0
Gpaa1	0	0.200573	0.416	0.1	0
Pmpca	0	0.200536	0.341	0.076	0
Smarca4	0	0.200033	0.46	0.124	0
Atp5j2	8.74622e-308	0.677465	0.834	0.522	1.60414e-303
Slirp	1.20285e-307	0.263456	0.709	0.302	2.20614e-303
Ndufb7	1.26433e-307	0.529248	0.813	0.449	2.31891e-303
Hikeshi	2.26114e-307	0.23494	0.722	0.294	4.14715e-303
Chpt1	8.08563e-307	0.326318	0.561	0.201	1.48299e-302
Reep4	4.82324e-306	0.215404	0.253	0.054	8.8463e-302
Prdx2	5.23591e-305	0.456633	0.856	0.502	9.60318e-301
Fdx1	1.05351e-303	0.226364	0.666	0.26	1.93225e-299
Cct4	1.20935e-303	0.385588	0.81	0.413	2.21807e-299
Psmb5	2.94396e-303	0.426853	0.801	0.433	5.39952e-299
Ndufs4	7.26791e-303	0.424178	0.798	0.413	1.33301e-298
Hspa8	7.89227e-302	0.653481	0.875	0.608	1.44752e-297
Acadm	2.07872e-301	0.603928	0.625	0.267	3.81258e-297
Carhsp1	7.95953e-300	0.228972	0.71	0.288	1.45986e-295
Psmd1	1.09144e-299	0.203834	0.584	0.211	2.00182e-295
Ppdpf	1.67641e-299	0.294828	0.757	0.339	3.0747e-295
Acot13	1.13844e-298	0.219156	0.502	0.17	2.088e-294
Emg1	1.18886e-298	0.324215	0.787	0.378	2.1805e-294
Gtf2a2	1.522e-298	0.225145	0.759	0.326	2.79149e-294
Nono	1.56279e-298	0.20588	0.703	0.284	2.86631e-294
Sdc1	4.22764e-298	0.254754	0.377	0.11	7.75392e-294
Lpl	8.42832e-298	0.441677	0.893	0.492	1.54584e-293
Cdkn2d	1.14052e-297	0.346701	0.435	0.141	2.09182e-293
2410015M20Rik	2.29802e-297	0.44492	0.786	0.411	4.21479e-293
Ptgr2	6.6554e-297	0.200925	0.373	0.105	1.22067e-292
Thoc7	2.00026e-296	0.247806	0.727	0.305	3.66867e-292
Ube2i	7.75373e-296	0.290942	0.824	0.388	1.42211e-291
Hnrnpf	3.55119e-295	0.385888	0.85	0.484	6.51323e-291
Vdac3	9.1692e-295	0.364125	0.807	0.418	1.68172e-290
Cisd3	1.87599e-294	0.217109	0.493	0.166	3.44075e-290
Commd1	1.94099e-294	0.268148	0.753	0.328	3.55997e-290
Naa38	2.16474e-292	0.232725	0.666	0.268	3.97036e-288
Psmd12	5.90607e-292	0.202959	0.676	0.267	1.08323e-287
Psmd13	7.80365e-292	0.204546	0.652	0.252	1.43127e-287
Spg21	5.9604e-291	0.204188	0.632	0.242	1.0932e-286
Psma3	1.80813e-290	0.433591	0.891	0.56	3.31629e-286
Hint2	2.83945e-289	0.205489	0.567	0.207	5.20784e-285
Ripk3	8.35513e-289	0.217397	0.269	0.063	1.53241e-284
Lypd1	1.70954e-288	0.383943	0.394	0.123	3.13547e-284
Endog	1.90405e-288	0.224473	0.434	0.138	3.49221e-284
Ube2l3	3.8307e-288	0.266514	0.798	0.361	7.02588e-284
Ndufs6	6.65556e-288	0.427243	0.778	0.404	1.2207e-283
Uqcrh	8.43687e-288	0.66706	0.851	0.579	1.54741e-283
Ndufb4	1.11352e-286	0.441467	0.791	0.422	2.04231e-282
Fam104a	1.02515e-285	0.223553	0.761	0.325	1.88023e-281
Uqcrb	1.87024e-285	0.644499	0.831	0.542	3.4302e-281
Eif3c	3.38692e-285	0.290951	0.813	0.388	6.21195e-281
Stub1	8.85761e-285	0.323932	0.812	0.408	1.62457e-280
Rpl5	3.21209e-284	0.471415	0.895	0.61	5.89129e-280
Ube2k	2.01829e-282	0.231517	0.755	0.327	3.70175e-278
Slbp	2.22995e-282	0.211323	0.567	0.211	4.08995e-278
Psmb6	3.56725e-281	0.408834	0.856	0.516	6.54269e-277
St13	4.73034e-281	0.208976	0.733	0.312	8.67591e-277
Aldoa	4.36053e-279	0.789287	0.801	0.57	7.99765e-275
Acadvl	2.93848e-278	0.355642	0.597	0.238	5.38946e-274
Ube3a	3.49653e-278	0.218527	0.732	0.311	6.41299e-274
Mcee	4.99519e-278	0.246542	0.582	0.219	9.16168e-274
Mlf2	8.98093e-278	0.278514	0.831	0.4	1.64719e-273
Ckap4	7.31964e-276	0.561203	0.706	0.347	1.3425e-271
Ctsc	1.50099e-275	0.297751	0.461	0.16	2.75296e-271
Lamtor1	4.62705e-275	0.217505	0.77	0.339	8.48646e-271
Cbx1	5.10036e-275	0.200603	0.738	0.31	9.35457e-271
Psma1	1.39398e-274	0.350362	0.787	0.405	2.5567e-270
Atp5j	2.33152e-274	0.382106	0.931	0.652	4.27625e-270
Rplp1	4.9279e-274	0.437431	0.938	0.633	9.03827e-270
Zcrb1	1.12214e-271	0.235613	0.767	0.346	2.05812e-267
Mocs2	4.38643e-271	0.219045	0.672	0.278	8.04514e-267
Cox6a1	4.91945e-271	0.519518	0.883	0.597	9.02276e-267
Prelid1	8.43504e-270	0.297088	0.833	0.416	1.54707e-265
Mpc1	1.48262e-269	0.676736	0.76	0.443	2.71927e-265
Ube2n	8.93537e-269	0.226528	0.768	0.344	1.63884e-264
Psmd7	9.79975e-266	0.339508	0.841	0.453	1.79737e-261
Zfp706	2.11808e-265	0.251238	0.804	0.388	3.88477e-261
Ndufb11	3.21468e-265	0.428888	0.851	0.512	5.89605e-261
Eif3a	6.64628e-265	0.298584	0.848	0.441	1.21899e-260
Rpl13	5.19029e-264	0.438836	0.952	0.733	9.51952e-260
Mrps24	5.34561e-264	0.3144	0.839	0.443	9.80438e-260
Rexo2	6.60748e-264	0.376604	0.863	0.496	1.21188e-259
Sumo2	2.11375e-263	0.443778	0.91	0.651	3.87683e-259
Rpl23	1.10679e-262	0.407538	0.954	0.718	2.02997e-258
Fmc1	1.67213e-261	0.246862	0.607	0.246	3.06685e-257
Decr1	1.34606e-260	0.251993	0.503	0.179	2.46881e-256
Swi5	5.04921e-258	0.389592	0.92	0.61	9.26075e-254
Eif2s2	2.22476e-257	0.315806	0.827	0.435	4.08044e-253
Timm8b	2.32077e-257	0.301576	0.734	0.347	4.25652e-253
Pcbp1	7.34195e-256	0.33613	0.836	0.472	1.34659e-251
Cox6c	1.04229e-255	0.540664	0.884	0.604	1.91166e-251
Manf	1.27329e-255	0.374798	0.822	0.462	2.33534e-251
Ndufb2	3.09628e-255	0.285826	0.694	0.32	5.67889e-251
Rps4x	1.31327e-254	0.427679	0.943	0.685	2.40867e-250
Srsf2	6.95786e-252	0.32601	0.777	0.425	1.27614e-247
Eif5	1.32885e-251	0.374979	0.868	0.543	2.43724e-247
Hnrnpa3	9.59836e-251	0.291048	0.814	0.435	1.76044e-246
Eef1d	1.49176e-250	0.400747	0.858	0.539	2.73604e-246
Rpl39	1.88177e-249	0.459022	0.934	0.664	3.45135e-245
Rpl26	1.96501e-249	0.430511	0.939	0.69	3.60402e-245
Cwc15	1.34569e-248	0.217376	0.741	0.345	2.46814e-244
Canx	6.37969e-245	0.283824	0.865	0.475	1.1701e-240
H2-Q7	3.92098e-244	0.43955	0.685	0.339	7.19146e-240
Mrfap1	4.74781e-244	0.383927	0.904	0.571	8.70797e-240
Rplp2	1.03581e-242	0.40721	0.925	0.672	1.89978e-238
Taldo1	1.90581e-241	0.520329	0.67	0.349	3.49545e-237
Gm4951	2.10633e-241	0.240046	0.403	0.138	3.86322e-237
Hadhb	2.9008e-241	0.323545	0.624	0.269	5.32035e-237
Nedd8	8.00083e-240	0.330801	0.847	0.501	1.46743e-235
Srsf3	8.14113e-239	0.341699	0.8	0.456	1.49316e-234
Bub3	7.05764e-237	0.222593	0.616	0.261	1.29444e-232
Polr2f	6.22097e-236	0.252124	0.77	0.388	1.14099e-231
Tubb4b	9.69795e-234	0.398475	0.728	0.394	1.7787e-229
Tma7	3.89281e-233	0.315046	0.853	0.504	7.13981e-229
Rps18	2.71701e-232	0.437561	0.928	0.69	4.98327e-228
Rpl31	3.83316e-231	0.412945	0.928	0.663	7.0304e-227
Rps15a	1.49206e-230	0.388933	0.948	0.713	2.73659e-226
Ndufa11	3.58536e-229	0.369082	0.791	0.445	6.5759e-225
Ndufa2	1.2244e-227	0.36944	0.867	0.555	2.24567e-223
Rpl11	2.69209e-226	0.385353	0.932	0.692	4.93755e-222
Me1	2.10863e-225	0.352418	0.273	0.076	3.86744e-221
Ywhae	2.24178e-224	0.330732	0.866	0.541	4.11166e-220
Rps25	2.74848e-222	0.389419	0.936	0.683	5.04099e-218
Rpl23a	2.78464e-222	0.362435	0.96	0.742	5.1073e-218
Ywhab	5.19356e-221	0.263562	0.845	0.462	9.52551e-217
Fkbp2	5.25885e-221	0.226923	0.813	0.407	9.64526e-217
Cnbp	1.42778e-217	0.375085	0.866	0.576	2.61868e-213
Psma6	5.40412e-217	0.245892	0.772	0.395	9.9117e-213
Elovl6	2.03253e-216	0.201572	0.233	0.06	3.72785e-212
Prdx1	4.35168e-215	0.435313	0.881	0.621	7.98142e-211
Psma7	8.45318e-214	0.336218	0.872	0.571	1.5504e-209
Rps20	7.21368e-213	0.363941	0.941	0.688	1.32306e-208
Akr1b3	1.44962e-208	0.276552	0.788	0.423	2.65874e-204
Npc2	7.77397e-202	0.455398	0.826	0.531	1.42582e-197
Ubd	1.35667e-201	0.311344	0.231	0.064	2.48827e-197
Rps23	4.65079e-200	0.356963	0.952	0.766	8.53002e-196
Park7	9.19024e-198	0.358287	0.824	0.541	1.68558e-193
Ssb	9.66935e-197	0.269522	0.853	0.503	1.77345e-192
Psmb4	2.1781e-196	0.275002	0.793	0.458	3.99485e-192
Rps7	8.88691e-193	0.321682	0.94	0.715	1.62995e-188
Anapc11	3.75648e-192	0.214395	0.79	0.421	6.88975e-188
Rps15	4.55445e-188	0.329251	0.927	0.668	8.35332e-184
Atpif1	1.45865e-184	0.250713	0.819	0.479	2.6753e-180
H3f3a	1.92761e-182	0.297958	0.925	0.676	3.53544e-178
Cfl1	1.18283e-181	0.304799	0.903	0.625	2.16944e-177
Psma2	3.63524e-179	0.278737	0.839	0.536	6.6674e-175
Fasn	1.69125e-178	0.435039	0.284	0.092	3.10192e-174
Rbm3	3.25227e-178	0.248102	0.844	0.518	5.96499e-174
Eif3k	1.05614e-174	0.255786	0.858	0.548	1.93706e-170
S100a1	5.57013e-174	0.247177	0.736	0.422	1.02162e-169
Tmed2	1.65495e-173	0.314662	0.883	0.586	3.03534e-169
Edf1	1.83924e-173	0.285708	0.88	0.576	3.37335e-169
Rps21	2.77839e-172	0.295912	0.89	0.611	5.09584e-168
Lgals1	2.18001e-171	0.433292	0.932	0.613	3.99836e-167
Smdt1	3.29248e-171	0.27485	0.857	0.547	6.03873e-167
Rpl36	2.61555e-167	0.360011	0.916	0.7	4.79718e-163
Rtraf	4.84085e-167	0.249495	0.862	0.552	8.8786e-163
Ssr2	1.00328e-165	0.261475	0.84	0.513	1.84012e-161
Rpl30	4.42337e-165	0.254081	0.926	0.664	8.1129e-161
Atp5e	6.86021e-164	0.314591	0.865	0.56	1.25823e-159
Rpl22	3.75495e-159	0.249817	0.896	0.616	6.88695e-155
Saa3	4.15235e-158	0.597533	0.216	0.068	7.61582e-154
Pcbp2	4.75875e-152	0.214637	0.849	0.539	8.72803e-148
Eef1a1	5.93006e-149	0.289397	0.96	0.776	1.08763e-144
Ndufa13	9.42281e-148	0.27873	0.869	0.588	1.72824e-143
Bst2	1.47016e-146	0.327911	0.806	0.533	2.69642e-142
mt-Atp6	4.95222e-146	0.524839	0.227	0.076	9.08287e-142
Rps26	2.15346e-145	0.285914	0.901	0.634	3.94965e-141
Rps28	2.65174e-145	0.271774	0.926	0.66	4.86356e-141
Arl6ip1	2.9351e-143	0.493397	0.807	0.509	5.38327e-139
Ssr4	7.2364e-143	0.236651	0.83	0.514	1.32723e-138
Pkm	7.67274e-136	0.281309	0.762	0.469	1.40726e-131
Tspo	7.15583e-134	0.263875	0.859	0.584	1.31245e-129
Jpt1	2.17533e-131	0.211247	0.781	0.475	3.98976e-127
Rpl37a	2.61378e-131	0.215155	0.931	0.669	4.79394e-127
Erp29	7.16376e-129	0.211136	0.778	0.479	1.31391e-124
P4hb	3.08303e-125	0.246387	0.781	0.493	5.65458e-121
Rpl17	3.12542e-125	0.230643	0.94	0.723	5.73233e-121
Rps24	9.61749e-125	0.205611	0.948	0.725	1.76394e-120
Rpl37	1.47528e-123	0.273169	0.921	0.691	2.70581e-119
Acaa2	3.03878e-123	0.30297	0.648	0.363	5.57344e-119
Ndufa6	5.24157e-122	0.304714	0.769	0.509	9.61357e-118
Gng5	5.705e-121	0.225261	0.903	0.632	1.04635e-116
Rpl34	1.11286e-118	0.250775	0.939	0.723	2.04109e-114
Cox7a2l	1.39139e-117	0.218957	0.843	0.585	2.55195e-113
Gpx8	2.02958e-111	0.228047	0.735	0.504	3.72246e-107
Lmna	6.43736e-111	0.279051	0.717	0.46	1.18068e-106
Cxcl10	3.47144e-108	0.349681	0.328	0.158	6.36696e-104
Txn1	5.36159e-107	0.208139	0.878	0.619	9.83369e-103
Rps14	4.89254e-106	0.21218	0.943	0.76	8.97341e-102
Cbx3	1.34752e-101	0.216585	0.51	0.291	2.47149e-97
Cxcl9	7.52637e-101	0.27282	0.461	0.257	1.38041e-96
Gpx7	3.0449e-100	0.265716	0.66	0.405	5.58465e-96
Ifi27l2a	2.28768e-90	0.228533	0.661	0.427	4.19584e-86
Timp1	1.58898e-79	0.707071	0.385	0.237	2.91435e-75
Thrsp	1.51155e-66	0.70115	0.24	0.121	2.77234e-62
Dynll1	6.1907e-54	0.225787	0.826	0.653	1.13544e-49
mt-Co1	1.59912e-49	0.230082	0.221	0.118	2.93294e-45
Calm2	2.22855e-46	0.202776	0.755	0.578	4.08738e-42
Vim	7.31739e-37	0.206359	0.862	0.684	1.34208e-32
Ccl2	1.76955e-29	0.595586	0.258	0.177	3.24553e-25
Scd1	2.6867e-24	0.812331	0.403	0.276	4.92768e-20

## Sheet: Immune
	p_val	avg_logFC	pct.1	pct.2	p_val_adj
Cd74	0	4.52467	0.335	0.012	0
H2-Aa	0	3.85253	0.304	0.016	0
H2-Ab1	0	3.84583	0.301	0.023	0
Ccl5	0	3.52659	0.327	0.039	0
H2-Eb1	0	3.50266	0.303	0.03	0
Cd52	0	3.13607	0.805	0.009	0
Rgs2	0	3.05778	0.737	0.065	0
Ccl4	0	2.77287	0.231	0.004	0
Coro1a	0	2.68077	0.786	0.008	0
Nkg7	0	2.64955	0.299	0.003	0
Rac2	0	2.42655	0.666	0.004	0
Ltb	0	2.28299	0.447	0.004	0
Areg	0	2.27123	0.235	0.003	0
Fcer1g	0	2.26776	0.445	0.011	0
Tyrobp	0	2.23199	0.426	0.007	0
Rgs1	0	2.22443	0.396	0.005	0
Ptprcap	0	2.17745	0.505	0.004	0
Trbc2	0	2.17504	0.385	0.002	0
Laptm5	0	2.17139	0.656	0.005	0
Tnfaip3	0	2.16849	0.481	0.039	0
Irf8	0	2.11663	0.351	0.05	0
Tmsb4x	0	2.0979	0.951	0.526	0
Emb	0	2.08486	0.431	0.044	0
Cd53	0	2.07837	0.602	0.002	0
Ptprc	0	2.04897	0.59	0.003	0
Selplg	0	2.01641	0.61	0.012	0
Pim1	0	2.00755	0.663	0.166	0
Ptpn18	0	1.96897	0.614	0.027	0
Ccr2	0	1.9512	0.482	0.002	0
Vps37b	0	1.93866	0.455	0.034	0
Ighm	0	1.91887	0.36	0.022	0
Ms4a4b	0	1.82821	0.24	0.007	0
Dennd4a	0	1.81154	0.523	0.038	0
Samsn1	0	1.80983	0.398	0.003	0
Il7r	0	1.80927	0.327	0.001	0
Gmfg	0	1.75903	0.501	0.007	0
Il2rg	0	1.74546	0.43	0.022	0
Gata3	0	1.7386	0.297	0.013	0
Klrk1	0	1.73419	0.326	0.001	0
Srgn	0	1.72153	0.828	0.186	0
Hcst	0	1.69236	0.356	0.002	0
Lcp1	0	1.67126	0.481	0.008	0
Trbc1	0	1.66523	0.277	0.002	0
H2-DMa	0	1.66041	0.29	0.019	0
Arhgdib	0	1.6544	0.658	0.079	0
Sh3bgrl3	0	1.64877	0.896	0.518	0
Sub1	0	1.64873	0.799	0.469	0
Stk17b	0	1.64324	0.467	0.04	0
Epsti1	0	1.62066	0.352	0.015	0
Ctss	0	1.59993	0.312	0.004	0
Traf1	0	1.57864	0.366	0.008	0
Cxcr6	0	1.5755	0.26	0.001	0
Cd7	0	1.56649	0.201	0.001	0
Tnfrsf18	0	1.56603	0.344	0.003	0
Cd69	0	1.56238	0.271	0.002	0
Alox5ap	0	1.51661	0.243	0.005	0
Gimap3	0	1.5039	0.275	0.001	0
Il2rb	0	1.50103	0.239	0.002	0
Cd37	0	1.49765	0.404	0.003	0
Dusp5	0	1.48929	0.417	0.046	0
Skap1	0	1.48619	0.306	0.001	0
Nfkbid	0	1.48507	0.327	0.005	0
Cytip	0	1.47213	0.39	0.002	0
Fxyd5	0	1.44612	0.73	0.329	0
Neurl3	0	1.42782	0.291	0.008	0
H2-DMb1	0	1.39909	0.235	0.016	0
Plbd1	0	1.39766	0.207	0.008	0
Fyb	0	1.39606	0.324	0.019	0
Slc38a1	0	1.36598	0.343	0.002	0
Klrd1	0	1.36153	0.213	0.001	0
Tespa1	0	1.35898	0.28	0.002	0
Cd48	0	1.35349	0.353	0.001	0
Itgb7	0	1.35256	0.421	0.034	0
Itk	0	1.33014	0.243	0.001	0
Arhgap45	0	1.30333	0.328	0.005	0
Cd83	0	1.30143	0.238	0.011	0
Cd82	0	1.29923	0.378	0.07	0
Pfn1	0	1.29628	0.894	0.677	0
Csrnp1	0	1.27928	0.4	0.087	0
Nabp1	0	1.26965	0.33	0.066	0
Nr4a2	0	1.26681	0.364	0.053	0
Napsa	0	1.2666	0.277	0.002	0
Gpr132	0	1.26428	0.311	0.001	0
2022-09-01	0	1.24574	0.303	0.044	0
Ucp2	0	1.2141	0.446	0.1	0
Apobec3	0	1.20903	0.468	0.127	0
Fam49b	0	1.19762	0.404	0.071	0
Dok2	0	1.194	0.237	0.002	0
Gpr183	0	1.18747	0.219	0.001	0
Arhgap30	0	1.15773	0.323	0.001	0
Fau	0	1.15637	0.914	0.694	0
Hcls1	0	1.15122	0.346	0.012	0
Bcl2a1b	0	1.15075	0.211	0.001	0
Itgb2	0	1.13688	0.296	0.002	0
Gpr171	0	1.12393	0.25	0.002	0
Cnn2	0	1.11928	0.511	0.159	0
Rel	0	1.10404	0.285	0.033	0
Fam107b	0	1.07673	0.303	0.037	0
Sla	0	1.06592	0.27	0.002	0
Cyth4	0	1.05815	0.269	0.001	0
B4galnt1	0	1.05318	0.289	0.027	0
Pmaip1	0	1.0322	0.214	0.005	0
Spi1	0	1.02293	0.245	0.001	0
St8sia4	0	1.0211	0.312	0.028	0
Fam105a	0	1.01714	0.285	0.011	0
Rps11	0	1.01393	0.896	0.731	0
Cd24a	0	1.00319	0.223	0.027	0
Ezr	0	0.99758	0.301	0.025	0
Fermt3	0	0.983467	0.253	0.004	0
Mpeg1	0	0.972208	0.217	0.013	0
Snx20	0	0.965047	0.256	0.004	0
Arhgap15	0	0.958352	0.258	0.013	0
Ptpn6	0	0.955603	0.243	0.003	0
Glipr1	0	0.946166	0.243	0.002	0
Dock2	0	0.939685	0.226	0.001	0
Plek	0	0.939496	0.234	0.007	0
Dock10	0	0.924233	0.316	0.057	0
Tbc1d10c	0	0.918539	0.213	0.002	0
Ikzf1	0	0.916345	0.206	0.001	0
Jaml	0	0.910938	0.211	0.001	0
Itga4	0	0.899733	0.213	0.005	0
Myo1g	0	0.894491	0.227	0.003	0
Nr4a3	0	0.894337	0.213	0.019	0
Sema4a	0	0.8906	0.231	0.018	0
Tuba4a	0	0.881706	0.226	0.028	0
Evi2a	0	0.868962	0.243	0.022	0
Arhgap9	0	0.836696	0.205	0.002	0
Unc119	0	0.834682	0.252	0.031	0
Tes	0	0.743197	0.208	0.019	0
Ncf4	0	0.733194	0.203	0.002	0
Lsp1	2.07118e-304	1.61805	0.568	0.228	3.79875e-300
Cotl1	4.54675e-301	1.32477	0.625	0.279	8.33919e-297
Nr4a1	1.38434e-294	1.45544	0.574	0.214	2.53901e-290
Btg1	3.64256e-294	1.49705	0.764	0.463	6.68082e-290
Ctla2a	1.80381e-293	1.24759	0.409	0.102	3.30837e-289
Spint2	8.7207e-291	0.743094	0.221	0.031	1.59946e-286
Gimap5	2.09411e-276	0.983184	0.221	0.033	3.84081e-272
Gimap1	6.13614e-276	0.986773	0.258	0.045	1.12543e-271
Id2	2.16625e-274	1.55525	0.693	0.383	3.97312e-270
Ramp1	4.08327e-267	0.984583	0.325	0.071	7.48912e-263
Actr3	7.69889e-261	1.24755	0.675	0.39	1.41205e-256
Crem	3.74525e-254	1.38651	0.352	0.093	6.86916e-250
Evl	3.37431e-252	0.983159	0.309	0.071	6.18881e-248
Shisa5	2.05092e-251	1.44326	0.764	0.502	3.7616e-247
Ankrd44	4.67022e-245	0.893603	0.301	0.068	8.56565e-241
Rps16	1.03459e-242	0.874489	0.906	0.75	1.89754e-238
Gng2	4.03014e-241	0.818877	0.258	0.052	7.39167e-237
Limd2	1.26104e-234	1.20155	0.467	0.174	2.31287e-230
Rpl19	1.22472e-231	0.827342	0.897	0.715	2.24626e-227
S100a4	2.77154e-224	1.28949	0.356	0.104	5.08328e-220
Hmgb2	2.39388e-212	1.33953	0.566	0.251	4.39061e-208
Rpl18a	2.52692e-207	0.789546	0.895	0.734	4.63462e-203
Rps3	5.17905e-207	0.754354	0.908	0.743	9.4989e-203
Rps13	2.92957e-204	0.865995	0.872	0.692	5.37313e-200
Rps24	8.85636e-199	0.837953	0.913	0.739	1.62434e-194
Cyba	1.3096e-193	1.07097	0.748	0.538	2.40193e-189
Arpc2	5.89189e-188	0.995001	0.754	0.567	1.08063e-183
2022-09-06	1.7741e-186	0.901204	0.333	0.105	3.25388e-182
Gimap6	1.21488e-184	1.1241	0.379	0.129	2.22822e-180
Gimap4	1.54454e-181	1.22077	0.249	0.061	2.83285e-177
Rpl32	6.99048e-180	0.742762	0.894	0.742	1.28212e-175
Psmb8	7.69206e-178	1.01876	0.721	0.512	1.4108e-173
Rcsd1	5.74388e-173	0.700982	0.217	0.047	1.05348e-168
Efhd2	8.10158e-172	0.920034	0.386	0.143	1.48591e-167
Gpsm3	9.21811e-172	0.870765	0.469	0.202	1.69069e-167
Junb	2.74951e-170	1.31745	0.748	0.526	5.04287e-166
Tgfb1	2.01208e-169	0.86042	0.376	0.132	3.69036e-165
Tm6sf1	6.80205e-166	0.536733	0.205	0.043	1.24756e-161
Rpsa	3.23406e-159	0.770178	0.84	0.641	5.9316e-155
Actg1	2.28949e-157	1.17586	0.777	0.639	4.19915e-153
Lrrfip1	1.60915e-155	0.874277	0.41	0.167	2.95135e-151
Rpl17	4.98736e-155	0.728256	0.873	0.738	9.14732e-151
Phf11b	3.78021e-151	0.729533	0.216	0.054	6.93329e-147
Nfkb1	3.48214e-148	1.39077	0.44	0.205	6.38659e-144
Fnbp1	9.76455e-145	0.618638	0.224	0.059	1.79092e-140
Ddx5	2.82316e-144	0.983007	0.818	0.653	5.17795e-140
Rpl18	9.38566e-143	0.708964	0.844	0.686	1.72142e-138
Rps14	3.61451e-140	0.624948	0.904	0.771	6.62937e-136
Slc9a3r1	8.21934e-140	0.727846	0.223	0.06	1.50751e-135
Rps6	6.3069e-139	0.64876	0.856	0.734	1.15675e-134
Tnfaip8	1.68728e-137	0.799035	0.342	0.128	3.09463e-133
Lgals3	2.88041e-137	1.70085	0.384	0.174	5.28297e-133
H3f3b	1.24719e-136	0.91171	0.805	0.671	2.28747e-132
Actb	3.95435e-135	1.48473	0.507	0.268	7.25267e-131
Rps15a	4.65559e-134	0.707403	0.873	0.73	8.53882e-130
Slfn2	4.18612e-133	0.844592	0.301	0.107	7.67776e-129
Tagln2	1.31571e-131	0.913391	0.676	0.467	2.41314e-127
Zfp36l2	7.75484e-129	1.13544	0.579	0.373	1.42232e-124
Rps9	3.63648e-128	0.681896	0.826	0.686	6.66967e-124
Rps10	5.59894e-128	0.71648	0.82	0.671	1.0269e-123
Arhgef6	1.01852e-125	0.681795	0.209	0.057	1.86808e-121
Clic1	5.35743e-124	0.782629	0.705	0.546	9.82606e-120
Arpc3	1.88651e-123	0.754259	0.717	0.569	3.46004e-119
H2-Q7	1.96072e-123	0.908323	0.597	0.362	3.59615e-119
Ets1	1.14737e-113	0.870458	0.344	0.146	2.10439e-109
Rps18	4.32962e-113	0.680883	0.838	0.707	7.94095e-109
H2afy	4.4759e-113	0.912867	0.498	0.308	8.20926e-109
Nfkbia	2.89749e-109	1.43005	0.699	0.564	5.31429e-105
Rpl8	1.10392e-107	0.636113	0.838	0.712	2.0247e-103
Rps7	2.02295e-106	0.695814	0.846	0.731	3.71029e-102
Rpl12	9.10214e-103	0.725063	0.793	0.646	1.66942e-98
Sec11c	1.3279e-102	0.824382	0.457	0.262	2.43549e-98
Stk24	2.21267e-102	0.792974	0.364	0.17	4.05826e-98
Ahcyl2	1.15726e-100	0.615448	0.201	0.063	2.12254e-96
Rplp2	3.04089e-100	0.712457	0.816	0.691	5.5773e-96
Gadd45b	2.51828e-97	1.59656	0.479	0.311	4.61877e-93
Cdc42ep3	6.11053e-97	0.600955	0.238	0.082	1.12073e-92
Crlf3	2.12266e-96	0.68724	0.21	0.069	3.89316e-92
Tspan13	2.43159e-96	0.220718	0.38	0.152	4.45978e-92
Rps5	2.14338e-91	0.500416	0.846	0.736	3.93118e-87
Pnrc1	3.69842e-90	0.963051	0.662	0.514	6.78327e-86
Rbm3	5.68518e-89	0.73179	0.679	0.544	1.04272e-84
Baz1a	6.52178e-88	0.707177	0.309	0.141	1.19616e-83
Ier5	1.95226e-87	0.796018	0.541	0.352	3.58065e-83
Elf1	1.82621e-85	0.859305	0.423	0.242	3.34945e-81
Csk	1.97708e-85	0.700591	0.31	0.142	3.62615e-81
Hspa8	4.54198e-85	0.811419	0.731	0.629	8.33044e-81
Rbm39	5.11436e-85	0.614909	0.808	0.712	9.38025e-81
Samhd1	6.16787e-82	0.822925	0.433	0.251	1.13125e-77
Rpl3	1.29464e-81	0.549112	0.801	0.716	2.3745e-77
Furin	2.3774e-80	1.07136	0.256	0.111	4.36038e-76
Rpl23	2.65354e-80	0.529585	0.856	0.736	4.86685e-76
H2afz	3.76853e-80	1.00988	0.572	0.401	6.91186e-76
Syngr2	1.02955e-79	1.01572	0.358	0.198	1.8883e-75
Zc3hav1	1.74198e-79	0.88624	0.344	0.177	3.19497e-75
Bhlhe40	6.31905e-79	0.781055	0.278	0.125	1.15898e-74
Rpl34	1.73851e-78	0.538011	0.835	0.74	3.1886e-74
Spty2d1	8.55598e-78	0.831444	0.311	0.15	1.56925e-73
Rps29	2.46824e-76	0.54661	0.814	0.719	4.52699e-72
Rps19	1.21414e-73	0.531739	0.826	0.732	2.22685e-69
Fosl2	2.62921e-73	0.898555	0.276	0.129	4.82224e-69
Iqgap1	6.58013e-72	0.7439	0.487	0.324	1.20686e-67
Capzb	9.10452e-72	0.728184	0.602	0.491	1.66986e-67
Lmnb1	1.70219e-71	0.513787	0.204	0.078	3.12199e-67
Rpl14	1.71703e-71	0.533243	0.803	0.7	3.14921e-67
Isy1	2.06467e-71	0.783673	0.261	0.121	3.78682e-67
Ppp1r18	7.9422e-71	0.648612	0.27	0.124	1.45668e-66
Gm2a	1.17475e-70	1.0436	0.335	0.189	2.15461e-66
Eef1a1	2.04567e-68	0.409664	0.883	0.79	3.75197e-64
Rpl37a	2.322e-68	0.540576	0.801	0.689	4.25877e-64
Rpl4	3.56659e-68	0.480546	0.808	0.713	6.54149e-64
Psme1	1.03528e-67	0.779016	0.563	0.455	1.89881e-63
Bcl2	6.4157e-67	0.905955	0.233	0.104	1.1767e-62
Cd44	4.75649e-66	0.678239	0.275	0.133	8.72389e-62
Itpkb	8.53028e-66	0.657696	0.287	0.137	1.56454e-61
Rps23	8.79228e-66	0.431044	0.883	0.779	1.61259e-61
Serinc3	1.52005e-65	0.62742	0.62	0.48	2.78792e-61
Klf6	7.46523e-65	0.869874	0.648	0.528	1.3692e-60
Rps3a1	1.07708e-64	0.42541	0.849	0.735	1.97547e-60
Hilpda	8.17518e-64	1.47874	0.269	0.139	1.49941e-59
Vasp	1.60065e-63	0.619325	0.455	0.294	2.93576e-59
Dbnl	1.76527e-63	0.604393	0.36	0.207	3.23768e-59
Rpl38	4.34116e-63	0.589655	0.739	0.647	7.96212e-59
Rpl30	5.05854e-62	0.537366	0.783	0.685	9.27786e-58
Nop53	8.66856e-61	0.724329	0.603	0.492	1.5899e-56
Rpl27a	1.66311e-60	0.451009	0.833	0.755	3.05032e-56
Crlf2	2.15074e-60	0.529043	0.243	0.111	3.94468e-56
Prcp	6.35802e-60	0.517395	0.271	0.131	1.16612e-55
Taldo1	1.09387e-59	0.735906	0.503	0.374	2.00627e-55
Peli1	1.39226e-59	0.617044	0.287	0.145	2.55355e-55
Twf2	2.42491e-59	0.470352	0.256	0.121	4.44753e-55
Slc3a2	1.05695e-58	0.608119	0.456	0.304	1.93854e-54
Fgl2	3.13166e-58	0.460116	0.293	0.147	5.74378e-54
Arpc5	6.16325e-58	0.597909	0.576	0.476	1.1304e-53
Tob2	7.9555e-58	0.79531	0.397	0.251	1.45912e-53
Cdc42se2	1.3121e-57	0.554465	0.241	0.113	2.40653e-53
Rrad	2.2396e-57	0.84191	0.205	0.088	4.10764e-53
Coq10b	6.17169e-57	0.704234	0.353	0.206	1.13195e-52
Ikbkb	8.74077e-56	0.486582	0.223	0.1	1.60314e-51
Rps27a	1.6839e-54	0.391611	0.823	0.731	3.08844e-50
Pkn1	7.1991e-54	0.475391	0.213	0.095	1.32039e-49
Sp110	9.31241e-54	0.465834	0.222	0.102	1.70799e-49
Sirt7	8.8749e-53	0.500266	0.208	0.093	1.62774e-48
Cfl1	5.67533e-52	0.548078	0.702	0.65	1.04091e-47
Rps15	1.71397e-51	0.483619	0.787	0.689	3.14359e-47
Rpl13	2.51774e-51	0.378584	0.852	0.75	4.61778e-47
Rpl36	8.27383e-51	0.487581	0.799	0.717	1.5175e-46
Mkrn1	1.31263e-50	0.584182	0.32	0.186	2.4075e-46
Grb2	3.06e-50	0.547368	0.318	0.185	5.61235e-46
Pabpc1	4.23918e-50	0.520701	0.691	0.58	7.77508e-46
Ifrd1	1.09191e-49	0.950783	0.415	0.289	2.00267e-45
Hnrnpf	1.41899e-49	0.552035	0.619	0.515	2.60256e-45
Rpl23a	2.59728e-49	0.377522	0.853	0.759	4.76366e-45
Mbnl1	2.90919e-49	0.655509	0.507	0.395	5.33575e-45
Jund	6.92377e-49	0.753967	0.707	0.629	1.26989e-44
H2-K1	2.12665e-48	0.484072	0.732	0.615	3.90049e-44
Rplp1	6.15626e-48	0.597678	0.752	0.659	1.12912e-43
Tap1	3.82899e-47	0.553811	0.324	0.197	7.02276e-43
Rpl5	5.7428e-47	0.540614	0.729	0.634	1.05329e-42
Rpl39	8.13432e-47	0.434087	0.79	0.686	1.49192e-42
Cnot6l	1.06336e-46	0.798161	0.269	0.152	1.95031e-42
Cdk11b	1.18707e-46	0.861642	0.344	0.218	2.1772e-42
Pycard	1.526e-46	0.60215	0.36	0.229	2.79884e-42
Rpl35a	8.14875e-46	0.38876	0.808	0.741	1.49456e-41
Rps26	3.79692e-45	0.456779	0.747	0.656	6.96394e-41
Abracl	3.86102e-45	0.581778	0.461	0.347	7.08149e-41
H2-D1	2.22817e-44	0.32135	0.832	0.715	4.08668e-40
Rpl6	3.75981e-44	0.40353	0.804	0.737	6.89588e-40
Psap	1.29744e-43	0.53495	0.399	0.71	2.37964e-39
H2-Q6	3.55625e-42	0.661092	0.314	0.196	6.52251e-38
Apbb1ip	6.66752e-42	0.599245	0.301	0.18	1.22289e-37
Tpt1	5.02366e-41	0.385928	0.84	0.77	9.2139e-37
Gna13	1.17951e-40	0.536118	0.268	0.153	2.16335e-36
Ivns1abp	2.63147e-40	0.55737	0.237	0.13	4.82638e-36
Rpl22	2.75092e-40	0.445124	0.712	0.64	5.04546e-36
Psmb9	3.1476e-40	0.766227	0.434	0.344	5.77302e-36
Dnaja1	1.63219e-38	0.967042	0.623	0.571	2.99359e-34
Ppp1cc	1.5696e-37	0.755166	0.507	0.422	2.87881e-33
Ube2d3	3.45306e-37	0.453342	0.681	0.626	6.33326e-33
Rack1	8.57165e-37	0.445887	0.713	0.633	1.57213e-32
H2-T23	1.00958e-36	0.39473	0.567	0.446	1.85166e-32
Rps20	1.07786e-36	0.417255	0.787	0.71	1.9769e-32
Chd2	1.21991e-36	0.646399	0.269	0.162	2.23744e-32
Man2b1	1.37444e-36	0.543517	0.283	0.175	2.52087e-32
Kctd12	2.09329e-36	0.527052	0.28	0.168	3.8393e-32
Atp2b1	4.30116e-36	0.619374	0.493	0.399	7.88877e-32
Rapgef6	5.81977e-36	0.616587	0.213	0.116	1.0674e-31
Gltp	8.91816e-36	0.52341	0.36	0.252	1.63568e-31
Smchd1	1.50066e-35	0.556045	0.314	0.205	2.75235e-31
Ass1	3.54989e-35	0.411219	0.225	0.121	6.51086e-31
Npm1	5.48614e-35	0.34164	0.722	0.625	1.00621e-30
Rpl21	6.20379e-35	0.425155	0.781	0.714	1.13784e-30
Bloc1s2	6.79401e-35	0.442077	0.241	0.139	1.24609e-30
Rpl26	8.58233e-35	0.347439	0.78	0.711	1.57409e-30
Rpl11	2.12974e-34	0.422398	0.778	0.713	3.90615e-30
Ptma	3.32044e-34	0.508527	0.746	0.704	6.09001e-30
Calm1	9.61259e-34	0.451064	0.754	0.721	1.76305e-29
Eif3h	1.05863e-32	0.455504	0.64	0.578	1.94164e-28
Diaph1	1.06997e-32	0.535423	0.259	0.157	1.96243e-28
Commd8	1.57866e-32	0.517865	0.307	0.203	2.89541e-28
Uvrag	2.9398e-32	0.340745	0.201	0.107	5.39189e-28
Srsf5	2.00614e-31	0.562873	0.576	0.5	3.67945e-27
Ankrd11	2.2343e-31	0.601215	0.477	0.388	4.09792e-27
Unc93b1	5.02867e-31	0.502573	0.247	0.153	9.22308e-27
Adgre5	1.60676e-30	0.570481	0.267	0.169	2.94695e-26
Nt5c	3.58795e-30	0.49993	0.342	0.238	6.58067e-26
Rps25	1.21602e-29	0.340646	0.759	0.705	2.23031e-25
Ppp1r11	1.63168e-29	0.508289	0.368	0.273	2.99267e-25
Leprotl1	6.36631e-29	0.55527	0.325	0.23	1.16764e-24
Actr2	1.33923e-28	0.469136	0.348	0.249	2.45628e-24
Tln1	1.49655e-28	0.476323	0.425	0.329	2.74483e-24
4930523C07Rik	2.35964e-28	0.602059	0.398	0.308	4.32781e-24
M6pr	1.15223e-27	0.4788	0.333	0.238	2.1133e-23
Ptbp3	1.22346e-27	0.405423	0.346	0.242	2.24395e-23
Tsc22d3	3.40488e-27	0.611792	0.408	0.312	6.24489e-23
Rps27rt	4.2107e-27	0.5859	0.381	0.293	7.72284e-23
Tpm3	4.31202e-27	0.420881	0.459	0.373	7.90867e-23
Serp1	6.18352e-27	0.573955	0.473	0.404	1.13412e-22
AW112010	8.97756e-27	1.07721	0.512	0.451	1.64657e-22
Nrip1	1.08058e-26	0.76745	0.335	0.252	1.9819e-22
Ptpn1	1.29623e-26	0.464131	0.243	0.152	2.37741e-22
Btg2	1.56468e-26	0.435702	0.65	0.582	2.86977e-22
Msn	2.24392e-26	0.425982	0.471	0.379	4.11557e-22
Rap1b	2.83246e-26	0.472049	0.563	0.497	5.19502e-22
Zcchc11	6.10779e-26	0.542153	0.231	0.146	1.12023e-21
Eef1b2	7.00574e-26	0.362578	0.711	0.631	1.28492e-21
Dnajc15	4.39705e-25	0.506722	0.346	0.254	8.06463e-21
H3f3a	4.9011e-25	0.41648	0.725	0.699	8.98911e-21
Sp100	5.65207e-25	0.459547	0.385	0.29	1.03665e-20
Ly6e	6.82708e-25	0.294123	0.733	0.646	1.25216e-20
Ldha	1.40572e-24	0.43593	0.622	0.541	2.57822e-20
Arid4a	2.94086e-24	0.38767	0.27	0.178	5.39383e-20
Pfdn5	6.44404e-24	0.34698	0.726	0.691	1.1819e-19
Rplp0	3.48208e-23	0.242267	0.793	0.696	6.38649e-19
Ppp1r12a	5.43472e-23	0.395986	0.411	0.317	9.96782e-19
Zyx	8.02005e-23	0.434529	0.333	0.24	1.47096e-18
Rps21	1.4664e-22	0.429156	0.669	0.637	2.68953e-18
Prr13	4.79669e-22	0.434722	0.479	0.403	8.79761e-18
Arpc4	5.90591e-22	0.392029	0.296	0.212	1.0832e-17
Ppp1r15a	7.12974e-22	0.613462	0.5	0.434	1.30767e-17
Btf3	8.02099e-22	0.346161	0.691	0.661	1.47113e-17
Sf3b1	1.37211e-21	0.409845	0.562	0.509	2.51659e-17
Rsbn1l	1.86147e-21	0.421297	0.303	0.216	3.41413e-17
Eif3f	2.71668e-21	0.371125	0.683	0.649	4.98266e-17
Khdrbs1	3.07791e-21	0.39922	0.374	0.293	5.64519e-17
Rora	4.59369e-21	1.06418	0.326	0.274	8.42529e-17
Rpl37	5.5743e-21	0.297332	0.756	0.712	1.02238e-16
Cst3	9.09756e-21	1.55841	0.342	0.605	1.66858e-16
Itsn2	1.14788e-20	0.370329	0.231	0.149	2.10533e-16
Ppp1ca	9.39319e-20	0.412542	0.605	0.58	1.7228e-15
Ywhah	1.8728e-19	0.450513	0.459	0.402	3.43491e-15
Birc2	2.46507e-19	0.482216	0.217	0.145	4.52119e-15
Necap2	3.00201e-19	0.314707	0.229	0.152	5.50599e-15
Acot7	3.94795e-19	0.492353	0.209	0.139	7.24094e-15
Tmsb10	5.66991e-19	0.307167	0.703	0.63	1.03992e-14
Skap2	3.68107e-18	0.351553	0.233	0.16	6.75144e-14
Vamp8	3.95662e-18	0.397641	0.437	0.377	7.25684e-14
2022-09-09	3.98454e-18	0.425988	0.229	0.158	7.30805e-14
Akap13	5.20194e-18	0.476393	0.39	0.319	9.54087e-14
Arhgef1	6.6301e-18	0.465892	0.221	0.151	1.21603e-13
Cmtm7	1.15539e-17	0.518775	0.315	0.249	2.11909e-13
Supt4a	1.68093e-17	0.477214	0.407	0.35	3.08299e-13
Rgs10	1.90189e-17	0.617316	0.297	0.239	3.48826e-13
Zfp36	2.39213e-17	0.656667	0.457	0.39	4.38741e-13
Cdc42	4.06826e-17	0.326551	0.648	0.625	7.46159e-13
Dnajc2	5.43792e-17	0.430048	0.245	0.175	9.97368e-13
Cox7a2l	7.82235e-17	0.360855	0.644	0.609	1.4347e-12
Taok3	1.0546e-16	0.35543	0.239	0.166	1.93424e-12
Ubald2	1.06711e-16	0.453536	0.345	0.277	1.95719e-12
Ywhaz	2.12926e-16	0.41152	0.396	0.334	3.90527e-12
Pole4	2.3203e-16	0.497206	0.312	0.248	4.25567e-12
Ncl	5.27503e-16	0.351519	0.545	0.477	9.67493e-12
Saraf	7.60721e-16	0.506938	0.478	0.436	1.39524e-11
Smc4	1.19926e-15	0.435792	0.276	0.207	2.19955e-11
Lmo4	1.3791e-15	1.04121	0.348	0.306	2.52941e-11
Dnajc7	1.72495e-15	0.389845	0.265	0.196	3.16373e-11
Ostf1	2.09107e-15	0.369653	0.5	0.468	3.83523e-11
Clk1	4.63854e-15	0.441821	0.36	0.3	8.50755e-11
Eif3e	7.98813e-15	0.416426	0.549	0.522	1.4651e-10
Plac8	8.48514e-14	0.717199	0.28	0.212	1.55626e-09
Pitpna	1.13012e-13	0.383368	0.327	0.274	2.07275e-09
Rab8a	1.29534e-13	0.371202	0.269	0.207	2.37578e-09
Kdm6b	3.65674e-13	0.518626	0.267	0.207	6.70682e-09
Rhog	3.99412e-13	0.341111	0.211	0.151	7.32562e-09
Eef2	4.47192e-13	0.308503	0.705	0.68	8.20196e-09
Rps4x	7.60424e-13	0.204573	0.763	0.708	1.39469e-08
Rgcc	8.14303e-13	0.52589	0.357	0.282	1.49351e-08
Jmjd1c	8.32717e-13	0.392823	0.303	0.243	1.52729e-08
Rpl13a	9.36703e-13	0.281748	0.641	0.601	1.71801e-08
Rps28	1.06094e-12	0.246343	0.733	0.684	1.94588e-08
Rpl15	1.94558e-12	0.25971	0.725	0.684	3.56838e-08
Oaz1	2.00812e-12	0.266947	0.702	0.696	3.68309e-08
Prpf38b	2.33007e-12	0.334811	0.309	0.253	4.27358e-08
Wdr1	2.53425e-12	0.312412	0.339	0.278	4.64807e-08
Ppt1	2.88674e-12	0.745418	0.263	0.222	5.29458e-08
Sfpq	3.70659e-12	0.426167	0.446	0.409	6.79825e-08
Slbp	4.14948e-12	0.422577	0.296	0.244	7.61057e-08
Gpi1	4.55007e-12	0.321934	0.444	0.393	8.34528e-08
Tmpo	4.80814e-12	0.302433	0.277	0.214	8.81861e-08
Odc1	4.87968e-12	0.689271	0.273	0.224	8.94982e-08
Uhrf2	5.95521e-12	0.611183	0.308	0.258	1.09224e-07
Trim30a	6.20778e-12	0.315647	0.251	0.189	1.13857e-07
Ctsc	1.09666e-11	0.325044	0.245	0.187	2.01138e-07
Snx5	1.30031e-11	0.381951	0.295	0.242	2.3849e-07
Pnn	1.37045e-11	0.415915	0.339	0.29	2.51355e-07
Fosb	5.04053e-11	0.711456	0.515	0.488	9.24483e-07
Anp32b	5.17599e-11	0.288609	0.52	0.486	9.49329e-07
Eif3m	5.7876e-11	0.360904	0.462	0.435	1.0615e-06
Serbp1	1.21556e-10	0.320181	0.592	0.563	2.22946e-06
Prrc2c	1.21981e-10	0.431682	0.434	0.403	2.23724e-06
Ptp4a2	3.14735e-10	0.347916	0.519	0.501	5.77255e-06
Rpl10a	3.26109e-10	0.210084	0.7	0.66	5.98116e-06
Tiparp	4.03326e-10	0.368911	0.215	0.166	7.3974e-06
Pak2	4.62523e-10	0.347014	0.289	0.237	8.48314e-06
Nono	5.09116e-10	0.331877	0.368	0.324	9.33769e-06
Srpk1	7.05303e-10	0.42333	0.247	0.201	1.2936e-05
Ppm1m	8.4904e-10	0.342856	0.209	0.163	1.55722e-05
Fam96a	9.81187e-10	0.347887	0.291	0.241	1.79959e-05
Ppm1g	1.47611e-09	0.348656	0.249	0.199	2.70734e-05
Cdkn1a	2.0586e-09	0.364924	0.376	0.326	3.77568e-05
Arf6	2.51347e-09	0.329897	0.293	0.245	4.60995e-05
Pkm	3.26866e-09	0.325327	0.517	0.497	5.99505e-05
Tma7	4.26693e-09	0.279533	0.562	0.538	7.82598e-05
Rpl7	6.00725e-09	0.223406	0.734	0.705	0.000110179
Dazap2	6.24658e-09	0.298777	0.344	0.301	0.000114568
Pold4	7.60132e-09	0.290451	0.261	0.212	0.000139416
Xrn2	1.37409e-08	0.410841	0.264	0.22	0.000252023
Rbfa	2.13051e-08	0.433504	0.216	0.175	0.000390758
Esyt1	2.22627e-08	0.378958	0.244	0.2	0.000408321
Fbl	3.37114e-08	0.327435	0.314	0.274	0.0006183
Ccnd2	3.39492e-08	0.448901	0.473	0.474	0.000622662
Spcs2	3.51406e-08	0.350919	0.489	0.488	0.000644513
Srsf2	4.81678e-08	0.31329	0.484	0.459	0.000883446
Capza2	6.03807e-08	0.32022	0.443	0.443	0.00110744
Gm9493	6.62724e-08	0.324692	0.245	0.205	0.0012155
Set	6.62737e-08	0.305936	0.455	0.426	0.00121553
Cdc42se1	8.33246e-08	0.260499	0.237	0.193	0.00152826
Ppia	8.59707e-08	0.200293	0.74	0.741	0.00157679
Nsd3	9.69374e-08	0.419321	0.279	0.241	0.00177793
Dek	1.00105e-07	0.288212	0.419	0.388	0.00183603
Crip1	1.14945e-07	0.265765	0.572	0.566	0.00210821
Tra2b	1.25745e-07	0.389226	0.445	0.431	0.00230628
Lmna	1.43667e-07	0.288473	0.374	0.492	0.002635
Srrm2	1.5467e-07	0.280263	0.593	0.596	0.00283681
Slc38a2	1.80197e-07	0.420848	0.433	0.414	0.00330499
Emd	1.81247e-07	0.256664	0.257	0.213	0.00332424
Rpl29	2.02646e-07	0.233911	0.701	0.682	0.00371673
Cnbp	2.05772e-07	0.319624	0.605	0.605	0.00377406
Ythdc1	2.42111e-07	0.472667	0.283	0.25	0.00444055
Sin3b	2.8586e-07	0.303531	0.341	0.304	0.00524296
Hnrnpa1	5.9081e-07	0.250729	0.47	0.446	0.010836
Srsf3	6.10249e-07	0.283725	0.503	0.49	0.0111926
Capza1	6.64056e-07	0.276965	0.241	0.203	0.0121794
Gm26917	7.65186e-07	0.361854	0.254	0.22	0.0140343
Ppp4c	8.74529e-07	0.305975	0.33	0.299	0.0160397
Ifngr1	1.05499e-06	0.499744	0.511	0.531	0.0193496
Ier2	1.57407e-06	0.272952	0.519	0.482	0.0288701
Lsm4	2.25532e-06	0.284923	0.43	0.412	0.0413648
Tsc22d4	2.40552e-06	0.304323	0.229	0.194	0.0441197
Raly	2.50271e-06	0.289634	0.413	0.393	0.0459021
Selenot	2.61172e-06	0.344986	0.334	0.307	0.0479016
Ncor1	3.04449e-06	0.323788	0.522	0.52	0.0558391
Eif3k	3.96155e-06	0.232051	0.573	0.579	0.0726587
Tomm20	4.43752e-06	0.204734	0.504	0.481	0.0813885
Csnk2b	4.99309e-06	0.253599	0.33	0.299	0.0915783
Ube2l3	5.42602e-06	0.280634	0.417	0.404	0.0995185
Eif1	5.53492e-06	0.264856	0.739	0.756	0.101516
Ccnd3	6.00135e-06	0.342124	0.318	0.294	0.110071
Rbpj	7.31062e-06	0.255971	0.217	0.181	0.134084
Wnk1	7.38215e-06	0.378355	0.371	0.356	0.135396
Tpr	8.87417e-06	0.269965	0.49	0.483	0.162761
Anp32e	1.04058e-05	0.322367	0.247	0.217	0.190852
Plp2	1.28699e-05	0.273803	0.219	0.185	0.236047
Rbm25	1.58994e-05	0.296961	0.452	0.445	0.29161
Nsa2	1.61069e-05	0.30933	0.335	0.314	0.295417
Ccdc12	1.9409e-05	0.236438	0.458	0.462	0.35598
Atp5g2	4.06447e-05	0.210581	0.572	0.571	0.745465
Psma1	4.8756e-05	0.244039	0.451	0.443	0.894233
Dusp11	4.92596e-05	0.351616	0.254	0.23	0.90347
Stat1	5.23723e-05	0.373779	0.28	0.255	0.96056
Sf1	5.34575e-05	0.239452	0.207	0.176	0.980464
Polr1d	6.87217e-05	0.24658	0.523	0.535	1
Nudt21	7.40078e-05	0.279269	0.312	0.291	1
Dnajb6	0.000103508	0.276033	0.382	0.374	1
Ubl5	0.000118676	0.28756	0.497	0.515	1
Dnajc8	0.000121117	0.251483	0.412	0.408	1
Gtf2b	0.000123417	0.270902	0.213	0.186	1
Card19	0.000133955	0.235504	0.213	0.182	1
Mcl1	0.000160056	0.247873	0.347	0.332	1
Got2	0.000161465	0.201266	0.225	0.196	1
Rtf2	0.000181441	0.231301	0.223	0.196	1
Mndal	0.000187373	0.284306	0.413	0.397	1
Nol7	0.000199507	0.218411	0.375	0.354	1
Cdk2ap2	0.000203364	0.315974	0.402	0.401	1
Safb2	0.000225588	0.280331	0.203	0.175	1
Snrpe	0.000273539	0.23643	0.479	0.478	1
Myh9	0.000287616	0.230066	0.215	0.185	1
Herpud1	0.000350952	0.279066	0.311	0.294	1
Adss	0.000355515	0.235207	0.207	0.182	1
Arhgdia	0.000373186	0.208879	0.513	0.545	1
Prdx6	0.000533103	0.578834	0.475	0.495	1
Eif2s1	0.000603085	0.228232	0.275	0.251	1
Rnf130	0.000686173	0.260199	0.241	0.218	1
Plekhj1	0.000731896	0.254242	0.324	0.305	1
Jak1	0.000739181	0.386673	0.447	0.466	1
Fkbp3	0.000866064	0.315187	0.382	0.38	1
Taf1d	0.000878358	0.265433	0.233	0.211	1
Cirbp	0.000993632	0.359604	0.26	0.243	1
Hprt	0.0010643	0.243837	0.276	0.256	1
Pomp	0.00129566	0.244962	0.512	0.556	1
Gtpbp4	0.00130241	0.233113	0.223	0.202	1
Ckb	0.00144678	0.230541	0.269	0.35	1
Ube2i	0.00150599	0.243772	0.434	0.432	1
Snrpf	0.0015862	0.233926	0.444	0.445	1
Rpl36al	0.0017362	0.224487	0.311	0.3	1
Tpst2	0.0018347	0.282114	0.219	0.199	1
Slc25a3	0.00188811	0.203928	0.606	0.606	1
Sptssa	0.0021698	0.388173	0.416	0.434	1
Anxa6	0.00217215	0.308925	0.356	0.361	1
Hnrnpa3	0.00230094	0.225425	0.463	0.474	1
Sf3b6	0.00253066	0.238732	0.414	0.419	1
Hnrnpd	0.00312391	0.248712	0.299	0.286	1
Gpbp1	0.00420292	0.225091	0.229	0.21	1
Pik3r1	0.00429699	0.208268	0.253	0.312	1
Snrpd3	0.00551382	0.238438	0.36	0.351	1
Zfp36l1	0.00718574	0.260439	0.439	0.525	1
Sdf2l1	0.0077036	0.408951	0.263	0.257	1
Llph	0.00773723	0.234465	0.293	0.285	1
Ccnl1	0.0077559	0.214259	0.489	0.503	1
Emg1	0.00853124	0.292773	0.41	0.419	1
Pdcd10	0.00887571	0.200873	0.3	0.288	1
Ogt	0.00896336	0.329351	0.249	0.24	1
Rpl35	0.00954042	0.207864	0.528	0.55	1
Ptbp1	0.0100317	0.253273	0.235	0.222	1
Gabarapl2	0.0100539	0.259095	0.49	0.518	1
Trir	0.0104094	0.262006	0.426	0.436	1
Arid1a	0.0112479	0.230777	0.227	0.212	1
Psme2	0.0118723	0.315043	0.457	0.492	1
Acin1	0.0168043	0.247417	0.336	0.336	1
Commd7	0.019139	0.236187	0.237	0.226	1
Rpl36a	0.0195681	0.207271	0.557	0.583	1
Arpc5l	0.0214978	0.229135	0.324	0.324	1
Naaa	0.0239779	1.0488	0.217	0.23	1
Vps28	0.0260645	0.231481	0.389	0.394	1
Commd4	0.0272086	0.261382	0.241	0.231	1
Foxp1	0.0353735	0.236028	0.263	0.251	1
Gls	0.0451798	0.25102	0.238	0.23	1
Vgll4	0.0465297	0.381041	0.207	0.204	1
Dad1	0.0544703	0.282829	0.543	0.62	1
Bclaf1	0.0551226	0.239118	0.342	0.347	1
Mettl23	0.062366	0.300114	0.243	0.242	1
Zfand6	0.0662235	0.238262	0.344	0.349	1
Ppp2ca	0.071257	0.214233	0.366	0.373	1
Glipr2	0.0750009	0.39899	0.211	0.214	1
Rbbp4	0.0924649	0.250194	0.273	0.275	1
Lsm5	0.112502	0.210698	0.263	0.263	1
Hnrnpm	0.119521	0.212701	0.295	0.292	1
Sltm	0.121902	0.23656	0.243	0.242	1
Ewsr1	0.123315	0.251135	0.33	0.34	1
Gpx1	0.133793	0.329783	0.415	0.521	1
Clint1	0.140507	0.238375	0.216	0.214	1
Ddx3y	0.190117	0.314822	0.259	0.265	1
Wac	0.192571	0.325401	0.259	0.265	1
Cdc37	0.198325	0.200328	0.42	0.441	1
Taf6l	0.199787	0.202074	0.245	0.245	1
Rnaseh2c	0.211602	0.309634	0.291	0.306	1
Sumo1	0.222657	0.210019	0.472	0.505	1
Arid4b	0.263502	0.234039	0.231	0.234	1
Eif3d	0.290419	0.200543	0.273	0.279	1
Gdi2	0.296887	0.274381	0.469	0.537	1
Snrnp70	0.300576	0.25096	0.4	0.433	1
Mia2	0.30527	0.212374	0.227	0.231	1
Cetn2	0.307993	0.233692	0.207	0.212	1
Snrpc	0.311325	0.253818	0.346	0.368	1
Ddx46	0.348645	0.209964	0.244	0.247	1
Hnrnpdl	0.349847	0.240054	0.39	0.415	1
Mien1	0.467284	0.205068	0.312	0.33	1
Plgrkt	0.468801	0.217377	0.238	0.268	1
Npm3	0.469036	0.267208	0.281	0.295	1
Thy1	0.471311	0.203401	0.318	0.367	1
Hnrnpl	0.478964	0.205054	0.232	0.239	1
Phip	0.503027	0.229835	0.239	0.251	1
2810474O19Rik	0.507503	0.230562	0.229	0.239	1
Gm10073	0.529133	0.272476	0.285	0.303	1
Ptp4a1	0.542696	0.232946	0.249	0.278	1
Tax1bp1	0.585792	0.20447	0.479	0.526	1
Aff4	0.614763	0.33173	0.199	0.212	1
H2afj	0.619145	0.264757	0.32	0.349	1
Nfkbiz	0.628888	0.43372	0.302	0.346	1
Churc1	0.636597	0.207406	0.289	0.308	1
Cited2	0.6429	0.325419	0.281	0.304	1
Tmem123	0.74272	0.618329	0.231	0.252	1
Phf3	0.798218	0.228036	0.2	0.211	1
Bzw1	0.809074	0.214795	0.318	0.343	1
Chd4	0.838102	0.234367	0.35	0.389	1
Eprs	0.918087	0.36507	0.347	0.387	1
Chd3	0.957863	0.23473	0.188	0.202	1
Dut	0.973087	0.204123	0.189	0.203	1
