# Supplementary material for: Deconstructing cold-induced brown adipocyte neogenesis in mice
Source: eLife. 2022 Jul 18;11:e80167. doi: 10.7554/eLife.80167 (PMC9348851; doi:10.7554/eLife.80167)
Supplement: Supplementary file 2. [file elife-80167-supp2.xlsx]

## Sheet: INFORMATION
Supplementary File 2. DEGs for each cluster in the reclustered CONTROL and COLD ASC iBAT data.
Related to Figure 2C-E.
List of DEGs define by Seurat by graph-based clustering. Each cluster is a new tab.
iBAT, ASCs only, CONTROL and COLD libraries.
Differentially expressed genes that define each cluster were identified using a Wilcoxon Rank Sum test in Seurat with the following parameters: min.pct = 0.20, logfc.threshold = 0.2, only.pos = TRUE.

## Sheet: ASC1_quiescent
	p_val	avg_logFC	pct.1	pct.2	p_val_adj
Smoc2	0	2.38086	0.971	0.542	0
Cxcl14	0	1.68282	0.846	0.551	0
Hsd11b1	0	1.49172	0.822	0.375	0
Crispld2	0	1.4818	0.769	0.277	0
Apoe	0	1.27114	0.871	0.648	0
Col5a3	0	1.21129	0.942	0.668	0
Gsn	0	1.20911	0.98	0.848	0
Abca8a	0	1.18656	0.954	0.589	0
Vwa1	0	1.1818	0.725	0.321	0
Sparcl1	0	1.18164	0.947	0.655	0
Fdps	0	1.10135	0.746	0.399	0
Lum	0	1.08529	0.971	0.733	0
Sc5d	0	1.02381	0.746	0.379	0
Ces1d	0	0.98514	0.71	0.367	0
Meg3	0	0.979508	0.92	0.673	0
Hmgcs1	0	0.979191	0.745	0.443	0
Scd2	0	0.972171	0.831	0.481	0
Spon1	0	0.926662	0.7	0.283	0
Tuba1a	0	0.924798	0.979	0.786	0
Angptl1	0	0.912865	0.738	0.406	0
Ndufa4l2	0	0.889505	0.764	0.425	0
Dcn	0	0.886628	0.969	0.861	0
Mafb	0	0.864708	0.797	0.545	0
Podn	0	0.863771	0.774	0.399	0
Nmb	0	0.860767	0.694	0.374	0
Actb	0	0.758722	0.826	0.424	0
G0s2	0	0.723135	0.881	0.596	0
Msmo1	0	0.719365	0.65	0.324	0
Sqle	0	0.674378	0.64	0.358	0
Ecm2	0	0.6311	0.799	0.487	0
Idi1	0	0.609653	0.657	0.409	0
2022-09-04	0	0.595141	0.658	0.341	0
Acsl3	0	0.592146	0.666	0.36	0
Dbi	0	0.575781	0.935	0.652	0
Spry2	0	0.523606	0.574	0.287	0
Insig1	0	0.480829	0.629	0.339	0
Adm	0	0.462712	0.617	0.3	0
Alkal2	0	0.42227	0.589	0.296	0
Cldn15	7.75321e-304	0.84449	0.689	0.442	1.55064e-300
Cst3	1.49286e-297	0.471004	0.971	0.752	2.98571e-294
Dlk1	6.42697e-297	0.719028	0.478	0.212	1.28539e-293
Fdft1	6.03682e-296	0.43182	0.572	0.33	1.20736e-292
Col4a3	2.50288e-294	0.385228	0.491	0.211	5.00577e-291
Meox1	9.78042e-292	0.765691	0.672	0.37	1.95608e-288
Col4a4	9.05465e-289	0.498989	0.526	0.211	1.81093e-285
Tm4sf1	2.31908e-287	0.2489	0.726	0.484	4.63817e-284
Avpr1a	1.91887e-274	0.3036	0.479	0.183	3.83773e-271
Mest	5.87075e-269	0.46367	0.57	0.322	1.17415e-265
Itm2a	4.34152e-266	0.625587	0.754	0.468	8.68303e-263
Nim1k	1.25012e-265	0.211004	0.482	0.252	2.50024e-262
Ubc	1.00665e-262	0.713482	0.944	0.772	2.0133e-259
Gpc3	8.3323e-260	0.40535	0.725	0.413	1.66646e-256
Pmvk	3.08767e-254	0.512578	0.586	0.348	6.17533e-251
Ltbp4	1.16539e-251	0.397994	0.662	0.383	2.33078e-248
Gng11	1.28164e-248	0.419075	0.8	0.543	2.56329e-245
AW112010	7.0963e-248	0.558059	0.885	0.666	1.41926e-244
Cyp51	2.23777e-242	0.358073	0.583	0.371	4.47554e-239
Trf	6.86179e-240	0.75948	0.619	0.368	1.37236e-236
Vtn	2.63854e-236	0.786544	0.531	0.231	5.27707e-233
Abca8b	7.58745e-231	0.613732	0.591	0.329	1.51749e-227
Myl9	1.40505e-225	0.27932	0.62	0.393	2.81009e-222
Nsdhl	1.6253e-223	0.621326	0.55	0.311	3.2506e-220
Scd1	1.46685e-222	0.668937	0.768	0.584	2.9337e-219
Spry1	1.15115e-210	0.814432	0.562	0.266	2.30231e-207
Lpl	1.22455e-208	0.423558	0.943	0.816	2.4491e-205
Mvd	2.53253e-207	0.30429	0.489	0.286	5.06506e-204
Ctsk	7.44815e-206	0.521959	0.804	0.548	1.48963e-202
S100a6	1.48729e-205	0.768706	0.972	0.815	2.97458e-202
Acss2	5.67901e-200	0.36586	0.492	0.283	1.1358e-196
Fasn	1.23122e-199	0.290286	0.584	0.389	2.46243e-196
Cebpd	1.9348e-187	0.480711	0.932	0.696	3.86961e-184
Col6a6	1.47963e-185	0.644225	0.503	0.254	2.95925e-182
Crip2	1.32973e-179	0.554138	0.889	0.709	2.65947e-176
Gm14964	5.19681e-179	0.554126	0.472	0.194	1.03936e-175
F3	6.10296e-169	0.373567	0.83	0.62	1.22059e-165
Gadd45b	1.79423e-168	0.421796	0.793	0.635	3.58845e-165
Slc39a1	6.63495e-167	0.231094	0.565	0.339	1.32699e-163
Pappa	1.32134e-165	0.37124	0.47	0.205	2.64269e-162
Slc9a3r2	5.73514e-163	0.254463	0.627	0.4	1.14703e-159
Sult1a1	8.67213e-161	0.344279	0.548	0.32	1.73443e-157
Ret	1.27016e-156	0.381026	0.459	0.253	2.54032e-153
Blnk	1.68326e-156	0.537941	0.47	0.213	3.36652e-153
Dusp1	4.45886e-150	0.521347	0.891	0.69	8.91772e-147
Acly	2.79618e-149	0.292642	0.657	0.439	5.59237e-146
Hspa1a	3.75255e-147	0.390425	0.67	0.529	7.50511e-144
Apod	1.48244e-146	0.900652	0.788	0.527	2.96487e-143
Ldlr	3.91162e-144	0.403821	0.549	0.347	7.82325e-141
H3f3b	5.22432e-143	0.558098	0.976	0.859	1.04486e-139
Nfia	6.02121e-143	0.279699	0.767	0.548	1.20424e-139
Txnip	1.82565e-140	0.573486	0.774	0.584	3.6513e-137
Sgk1	7.66372e-139	0.224121	0.636	0.428	1.53274e-135
Adap2	3.84005e-129	0.26064	0.432	0.181	7.6801e-126
Cpxm1	1.40919e-127	0.31845	0.837	0.641	2.81838e-124
Lsamp	6.89039e-126	0.519349	0.484	0.231	1.37808e-122
Junb	4.85131e-124	0.388482	0.922	0.798	9.70261e-121
Gm13889	6.46033e-121	0.246313	0.424	0.204	1.29207e-117
Ddt	2.58045e-116	0.311679	0.682	0.473	5.16091e-113
Srsf2	7.92412e-114	0.26223	0.87	0.733	1.58482e-110
Ifi27	4.61338e-108	0.298387	0.916	0.727	9.22676e-105
H2-Q10	1.33193e-107	0.729606	0.5	0.306	2.66387e-104
Timp3	1.15344e-106	0.549233	0.834	0.654	2.30688e-103
Msc	1.82368e-106	0.389154	0.438	0.217	3.64736e-103
Lamc3	3.57599e-106	0.367918	0.447	0.228	7.15198e-103
Mfge8	1.80261e-103	0.339751	0.796	0.619	3.60522e-100
Calm2	2.78637e-102	0.332843	0.914	0.758	5.57275e-99
Gm42418	1.13588e-97	0.216645	0.844	0.715	2.27176e-94
Mdk	2.47569e-96	0.414983	0.617	0.447	4.95138e-93
Fibin	3.92495e-96	0.312444	0.435	0.24	7.8499e-93
Vcam1	1.66628e-95	0.355625	0.682	0.499	3.33256e-92
Myoc	5.6608e-95	0.403181	0.421	0.251	1.13216e-91
Ier2	1.97255e-92	0.669587	0.875	0.735	3.9451e-89
Aldoa	1.35016e-88	0.250893	0.919	0.748	2.70031e-85
Zfp36	1.20008e-87	0.252142	0.827	0.652	2.40015e-84
Sh3bgrl3	9.92137e-87	0.326573	0.88	0.733	1.98427e-83
Ntf3	9.69587e-85	0.628202	0.48	0.248	1.93917e-81
Gm12216	3.40751e-81	0.209234	0.731	0.546	6.81502e-78
Fst	7.45078e-81	0.425423	0.821	0.672	1.49016e-77
Nnmt	5.86512e-80	0.291831	0.759	0.615	1.17302e-76
Fbln7	2.16487e-76	0.733689	0.572	0.449	4.32974e-73
Tmem97	1.56405e-73	0.326482	0.551	0.415	3.1281e-70
Ndufs5	7.43017e-73	0.232438	0.842	0.682	1.48603e-69
Kdelr2	4.38943e-70	0.36366	0.721	0.566	8.77887e-67
Atp1a2	2.46027e-66	0.389518	0.547	0.383	4.92055e-63
Hmgb1	8.49158e-66	0.265642	0.846	0.702	1.69832e-62
Aplp2	1.49085e-65	0.240461	0.852	0.709	2.9817e-62
Gm13715	7.54063e-65	0.331643	0.353	0.134	1.50813e-61
Abi3bp	9.6325e-64	0.207657	0.668	0.485	1.9265e-60
P2ry14	1.56034e-61	0.311794	0.392	0.219	3.12068e-58
Herpud1	1.22972e-57	0.284596	0.58	0.427	2.45944e-54
Cystm1	3.22328e-49	0.440208	0.44	0.287	6.44657e-46
Sqstm1	9.55722e-46	0.235007	0.732	0.595	1.91144e-42
Tslp	1.01113e-41	0.213221	0.348	0.203	2.02226e-38
Rasgrp2	3.2777e-41	0.283029	0.427	0.319	6.55541e-38
Nrxn2	1.23888e-38	0.444701	0.397	0.217	2.47776e-35
Bmp5	9.20608e-38	0.596951	0.42	0.268	1.84122e-34
2022-09-06	2.00244e-36	0.250182	0.49	0.386	4.00488e-33
Ppp1r14a	2.98512e-35	0.202396	0.359	0.229	5.97025e-32
Clec14a	4.89096e-30	0.400372	0.405	0.276	9.78191e-27
Plin2	2.18541e-29	0.274042	0.693	0.64	4.37082e-26
Col27a1	1.10278e-28	0.272744	0.523	0.434	2.20556e-25
Lox	6.35433e-27	0.268798	0.45	0.32	1.27087e-23
Nrep	1.07833e-25	0.328626	0.483	0.377	2.15666e-22
Serpine1	4.48494e-25	0.595239	0.522	0.431	8.96988e-22
Ftl1	5.08771e-21	0.319657	0.989	0.912	1.01754e-17
H1f0	5.2513e-18	0.206615	0.619	0.545	1.05026e-14
Higd1b	2.3879e-15	0.259087	0.303	0.16	4.77581e-12
Adh1	2.59572e-13	0.389159	0.428	0.311	5.19144e-10
Dnajb1	9.83654e-13	0.249248	0.7	0.639	1.96731e-09
Plvap	2.22797e-12	0.235652	0.421	0.338	4.45594e-09
Fosb	4.84525e-11	0.432513	0.795	0.742	9.6905e-08
Clec1a	3.3794e-07	0.431784	0.35	0.233	0.00067588
Cd82	3.41019e-06	0.230506	0.356	0.262	0.00682037
Hmcn2	0.000110001	0.382011	0.311	0.264	0.220002
Sox9	0.037884	0.301143	0.384	0.33	1
Hpgd	0.242362	0.284073	0.282	0.176	1
Gstt2	0.245479	0.295035	0.35	0.287	1
Il34	0.772106	0.291387	0.313	0.239	1

## Sheet: ASC1_coldactivated
	p_val	avg_logFC	pct.1	pct.2	p_val_adj
Cxcl9	0	1.46518	0.768	0.464	0
Timp1	0	1.30611	0.733	0.411	0
Tmem176a	0	1.18117	0.817	0.52	0
Tmem176b	0	1.08429	0.886	0.599	0
Isg15	0	1.01759	0.753	0.521	0
Bst2	0	0.930478	0.835	0.631	0
Postn	0	0.901434	0.734	0.525	0
Iigp1	0	0.862828	0.744	0.508	0
B2m	0	0.839426	0.96	0.882	0
H2-K1	0	0.8385	0.918	0.806	0
H2-Q7	0	0.829218	0.779	0.52	0
Lpl	0	0.825811	0.909	0.814	0
Angptl4	0	0.780755	0.743	0.39	0
Irf7	0	0.75293	0.68	0.441	0
Vcam1	0	0.651076	0.705	0.469	0
Sh3bgrl3	0	0.627994	0.865	0.722	0
Ctsc	0	0.609392	0.593	0.31	0
Lgmn	0	0.604649	0.649	0.401	0
Mndal	0	0.588976	0.743	0.511	0
Tnc	0	0.557184	0.475	0.215	0
Rtp4	0	0.526798	0.679	0.429	0
Cxcl16	0	0.479097	0.608	0.355	0
Sparcl1	0	0.46695	0.872	0.65	0
Lum	0	0.415901	0.909	0.729	0
Ifi203	9.0525e-308	0.644285	0.692	0.471	1.8105e-304
Cxcl10	4.63336e-297	1.2592	0.634	0.459	9.26672e-294
Plin2	1.62611e-296	0.616411	0.782	0.601	3.25221e-293
Col18a1	1.38335e-289	0.622395	0.629	0.425	2.76671e-286
Stat1	2.07553e-287	0.476052	0.605	0.394	4.15106e-284
Plpp1	4.14322e-274	0.460627	0.669	0.45	8.28644e-271
Tmem119	1.84127e-270	0.519902	0.588	0.372	3.68254e-267
Cpxm1	8.01896e-260	0.57085	0.785	0.638	1.60379e-256
Oasl2	1.656e-259	0.46271	0.55	0.316	3.31199e-256
Meox1	9.68138e-239	0.315337	0.606	0.361	1.93628e-235
Thbs1	1.72882e-231	0.654689	0.534	0.354	3.45764e-228
Hist1h2bc	1.37293e-223	0.522063	0.755	0.593	2.74586e-220
Rnf213	3.27935e-216	0.432339	0.527	0.337	6.5587e-213
AW112010	5.8615e-215	0.702965	0.787	0.678	1.1723e-211
Hmox1	1.05731e-213	0.438415	0.548	0.357	2.11462e-210
Pdia4	6.47007e-208	0.376491	0.701	0.504	1.29401e-204
Phf11d	1.47666e-206	0.401256	0.494	0.313	2.95333e-203
Ifit3	3.18738e-206	0.906364	0.557	0.387	6.37476e-203
Zbp1	1.26969e-204	0.312384	0.518	0.325	2.53939e-201
Ccnd2	3.72059e-201	0.455688	0.777	0.594	7.44119e-198
Cstb	3.96291e-198	0.486376	0.784	0.651	7.92582e-195
S1pr3	5.9317e-194	0.343894	0.495	0.337	1.18634e-190
Cthrc1	3.54119e-193	0.746719	0.435	0.211	7.08238e-190
Fbln7	8.29927e-189	0.525151	0.611	0.42	1.65985e-185
Palld	1.35619e-186	0.462464	0.466	0.269	2.71237e-183
Ifit1	2.90035e-185	0.820389	0.533	0.344	5.8007e-182
H2-T23	1.13475e-179	0.426693	0.667	0.488	2.2695e-176
Aspn	6.87416e-177	0.389717	0.791	0.636	1.37483e-173
Adam12	4.35705e-175	0.546364	0.55	0.398	8.7141e-172
Psmb8	1.63966e-172	0.407392	0.821	0.713	3.27932e-169
Lypd1	8.45959e-172	0.605818	0.541	0.393	1.69192e-168
Fkbp11	5.72574e-169	0.404995	0.595	0.416	1.14515e-165
Sdc1	1.50422e-168	0.416274	0.539	0.384	3.00844e-165
Maged2	7.71226e-168	0.353545	0.64	0.457	1.54245e-164
Tap1	3.31966e-160	0.345629	0.534	0.396	6.63933e-157
Tpm2	4.02351e-156	0.269226	0.549	0.442	8.04703e-153
Saa3	1.51982e-155	1.23678	0.464	0.293	3.03964e-152
Slc9a3r2	1.64057e-153	0.371549	0.546	0.405	3.28114e-150
Irgm1	1.71366e-148	0.355031	0.496	0.345	3.42731e-145
Sned1	6.83463e-146	0.534153	0.52	0.361	1.36693e-142
Xaf1	3.41586e-141	0.39678	0.548	0.41	6.83172e-138
Aoc3	1.71109e-139	0.343465	0.586	0.448	3.42219e-136
Peg3	8.41935e-134	0.483694	0.394	0.211	1.68387e-130
Gbp2	9.86492e-134	0.426416	0.524	0.379	1.97298e-130
Ccl7	1.50788e-132	0.902039	0.647	0.541	3.01575e-129
Icam1	1.48555e-130	0.367604	0.517	0.357	2.9711e-127
Cotl1	3.68777e-127	0.320464	0.605	0.465	7.37553e-124
mt-Co1	3.64273e-126	0.486024	0.6	0.54	7.28545e-123
Ccl2	2.1938e-125	1.09064	0.602	0.497	4.3876e-122
Ifi47	3.98962e-125	0.3764	0.391	0.243	7.97924e-122
Retsat	2.38681e-122	0.423512	0.469	0.338	4.77363e-119
Uhrf2	6.41701e-121	0.348539	0.547	0.413	1.2834e-117
Gbp7	8.75456e-121	0.331137	0.49	0.356	1.75091e-117
Trabd2b	1.87044e-120	0.3617	0.478	0.313	3.74087e-117
Ifi44	2.67451e-118	0.425978	0.373	0.17	5.34902e-115
Fgf10	2.21836e-117	0.463351	0.566	0.46	4.43671e-114
Sox4	2.66166e-114	0.382495	0.495	0.349	5.32331e-111
Fst	2.05879e-113	0.392472	0.765	0.676	4.11759e-110
Lox	1.28754e-111	0.213473	0.447	0.306	2.57508e-108
Trim30a	4.74746e-110	0.281458	0.454	0.316	9.49492e-107
Ubd	3.32241e-107	0.645135	0.375	0.16	6.64482e-104
Gm4951	1.2937e-106	0.407974	0.508	0.393	2.5874e-103
Egr2	4.4661e-104	0.33271	0.527	0.437	8.93219e-101
Gbp3	1.19551e-101	0.3264	0.473	0.353	2.39102e-98
Hbb-bs	1.28416e-100	0.491489	0.148	0.301	2.56832e-97
Serpine1	6.88456e-96	0.226079	0.54	0.413	1.37691e-92
Hilpda	3.36364e-95	0.201914	0.459	0.344	6.72728e-92
Igf1	8.47591e-95	0.347382	0.746	0.662	1.69518e-91
Pim1	1.06591e-91	0.281977	0.436	0.313	2.13183e-88
Tpm1	5.94948e-85	0.213687	0.586	0.479	1.1899e-81
Irgm2	4.50479e-82	0.237666	0.325	0.201	9.00959e-79
Hsp90b1	7.63379e-78	0.255838	0.903	0.886	1.52676e-74
Marcksl1	5.98829e-76	0.341329	0.406	0.304	1.19766e-72
Adamts4	1.03644e-75	0.303833	0.413	0.307	2.07289e-72
Gm26917	9.8029e-73	0.268595	0.6	0.526	1.96058e-69
Acta2	3.1133e-69	0.28366	0.48	0.407	6.2266e-66
Dnajb1	1.69701e-67	0.384104	0.682	0.638	3.39402e-64
Sqstm1	6.19288e-67	0.20795	0.69	0.595	1.23858e-63
Mdk	6.53392e-64	0.289692	0.539	0.456	1.30678e-60
Lmna	9.38206e-64	0.207204	0.786	0.684	1.87641e-60
Tor3a	9.8857e-62	0.273753	0.425	0.33	1.97714e-58
Tgm2	1.92609e-60	0.200124	0.411	0.322	3.85218e-57
Igtp	8.36003e-60	0.297514	0.403	0.317	1.67201e-56
Ifih1	1.04477e-58	0.32312	0.488	0.412	2.08955e-55
Id2	1.15738e-53	0.231019	0.603	0.526	2.31476e-50
Ccl19	2.84619e-53	0.258708	0.42	0.34	5.69238e-50
Hist1h1c	5.94528e-53	0.217213	0.461	0.378	1.18906e-49
Psmb9	3.39355e-51	0.244044	0.606	0.546	6.78711e-48
Mafb	7.54349e-49	0.213719	0.629	0.579	1.5087e-45
Hspa5	3.394e-47	0.246752	0.881	0.885	6.78799e-44
Dnm3os	1.11832e-46	0.263706	0.379	0.314	2.23664e-43
Ptx3	2.5318e-45	0.238984	0.461	0.377	5.0636e-42
H2-Q6	1.73009e-43	0.440264	0.498	0.444	3.46019e-40
Ccl8	9.97372e-42	0.486702	0.348	0.242	1.99474e-38
Cdh11	1.05423e-41	0.210355	0.319	0.193	2.10846e-38
Tusc5	4.17872e-39	0.276696	0.384	0.274	8.35744e-36
Fzd1	9.4867e-39	0.257108	0.394	0.31	1.89734e-35
Lhx8	7.53876e-37	0.300604	0.336	0.255	1.50775e-33
2022-09-09	1.85396e-33	0.20991	0.422	0.366	3.70792e-30
Ifit3b	1.38502e-30	0.415162	0.324	0.251	2.77004e-27
Slfn2	7.68169e-27	0.221801	0.3	0.21	1.53634e-23
Slc5a3	4.28002e-25	0.212807	0.468	0.451	8.56003e-22
Ass1	9.73387e-24	0.331974	0.43	0.386	1.94677e-20
Snai1	1.04969e-23	0.236833	0.408	0.362	2.09938e-20
Plin4	1.45277e-20	0.238239	0.307	0.233	2.90553e-17
Olfm2	2.36189e-20	0.22562	0.239	0.203	4.72378e-17
Cmbl	9.14205e-19	0.303891	0.453	0.431	1.82841e-15
Tagln	7.41782e-18	0.235658	0.406	0.394	1.48356e-14
Sgk1	4.78421e-17	0.234632	0.483	0.462	9.56843e-14
Gm42418	3.59585e-16	0.225353	0.729	0.743	7.19171e-13
Thbs2	7.89734e-16	0.201173	0.374	0.314	1.57947e-12
Creb3l3	2.35472e-15	0.232623	0.235	0.135	4.70943e-12
Socs1	1.26232e-14	0.21966	0.487	0.466	2.52463e-11
Rsad2	2.33143e-12	0.622117	0.352	0.3	4.66286e-09
Daxx	1.14828e-09	0.207676	0.406	0.393	2.29657e-06
Mmp11	4.62278e-08	0.21536	0.251	0.285	9.24555e-05
Plac8	1.90818e-06	0.587658	0.421	0.387	0.00381636
Nrep	2.34428e-05	0.251476	0.407	0.393	0.0468856
Ccl5	0.000267784	0.4661	0.286	0.261	0.535568
Hspb1	0.0131972	0.239618	0.574	0.59	1
Apoc1	0.0384981	0.271787	0.282	0.301	1
Ltc4s	0.206353	0.308246	0.246	0.103	1
mt-Co3	0.889466	0.296074	0.417	0.4	1

## Sheet: ASC2
	p_val	avg_logFC	pct.1	pct.2	p_val_adj
Pi16	0	3.67234	0.962	0.437	0
Sbsn	0	2.6256	0.791	0.364	0
Anxa3	0	2.06123	0.835	0.426	0
Igfbp6	0	2.05792	0.975	0.546	0
Dmkn	0	2.03054	0.611	0.197	0
Fn1	0	2.02761	0.966	0.52	0
Ackr3	0	1.88861	0.81	0.38	0
Sema3c	0	1.8689	0.746	0.251	0
Ugdh	0	1.84057	0.846	0.515	0
Cd55	0	1.82857	0.791	0.386	0
Cd248	0	1.77413	0.865	0.506	0
Pcolce2	0	1.73999	0.895	0.455	0
Igfbp5	0	1.69262	0.842	0.542	0
Pcsk6	0	1.68904	0.804	0.367	0
Ly6c1	0	1.64717	0.868	0.454	0
Procr	0	1.62895	0.796	0.457	0
Krtdap	0	1.60383	0.506	0.138	0
Creb5	0	1.53813	0.709	0.247	0
Emilin2	0	1.52276	0.793	0.393	0
Pla1a	0	1.51956	0.838	0.525	0
Dpp4	0	1.5129	0.639	0.223	0
Gfpt2	0	1.48607	0.776	0.372	0
Fbn1	0	1.48039	0.878	0.701	0
Mfap5	0	1.47539	0.927	0.632	0
Tmsb4x	0	1.43233	0.927	0.573	0
Col14a1	0	1.42838	0.836	0.373	0
Fndc1	0	1.42341	0.79	0.391	0
Il1r2	0	1.40349	0.507	0.203	0
Efhd1	0	1.38087	0.603	0.249	0
Has1	0	1.35053	0.59	0.283	0
Cadm3	0	1.33042	0.648	0.261	0
Anxa1	0	1.31145	0.891	0.723	0
Mustn1	0	1.30845	0.634	0.255	0
Ptgs2	0	1.30219	0.59	0.256	0
Stmn4	0	1.2697	0.584	0.12	0
Metrnl	0	1.24359	0.708	0.387	0
Tmem100	0	1.24125	0.689	0.311	0
Opcml	0	1.2412	0.545	0.152	0
Ace	0	1.21805	0.77	0.424	0
Lrrn4cl	0	1.20365	0.704	0.356	0
Sfrp2	0	1.18512	0.681	0.299	0
Clec3b	0	1.17706	0.985	0.737	0
Adgrd1	0	1.16523	0.584	0.213	0
Klf4	0	1.14477	0.91	0.596	0
Mt2	0	1.13	0.846	0.675	0
Limch1	0	1.10148	0.515	0.169	0
Smpd3	0	1.0787	0.566	0.176	0
Il33	0	1.03139	0.622	0.347	0
Il18	0	1.00696	0.574	0.302	0
Ecm1	0	0.979287	0.778	0.609	0
Tppp3	0	0.968814	0.807	0.553	0
Flrt2	0	0.964637	0.515	0.233	0
Ly6a	0	0.933294	0.94	0.74	0
Ckb	0	0.910843	0.702	0.496	0
Gas7	0	0.892558	0.561	0.308	0
Tmem158	0	0.863463	0.547	0.273	0
Pamr1	0	0.849105	0.496	0.2	0
Aif1l	0	0.828822	0.476	0.141	0
Nbl1	0	0.704688	0.694	0.479	0
Adamts16	0	0.576525	0.434	0.029	0
Timp3	0	0.496644	0.85	0.635	0
Slc6a13	0	0.281076	0.418	0.078	0
Mgll	2.86569e-298	0.851518	0.581	0.371	5.73139e-295
Lgi3	1.70317e-290	0.41468	0.427	0.171	3.40634e-287
Klf2	9.94535e-283	0.911879	0.739	0.544	1.98907e-279
Ecscr	7.53315e-263	0.65909	0.49	0.277	1.50663e-259
Errfi1	7.8198e-257	0.947397	0.685	0.535	1.56396e-253
Cyr61	1.09188e-246	0.759813	0.713	0.546	2.18376e-243
Iqgap2	3.51287e-244	0.353857	0.398	0.151	7.02573e-241
Dact2	1.44796e-243	1.06733	0.476	0.234	2.89592e-240
Aldh1a3	1.43169e-224	1.05015	0.433	0.109	2.86339e-221
Ppp1r14b	2.54139e-224	0.732598	0.729	0.627	5.08278e-221
Has2	9.96384e-211	0.376786	0.422	0.222	1.99277e-207
Wnt2	8.8364e-208	0.546529	0.381	0.085	1.76728e-204
Gm12840	8.30258e-207	0.36688	0.376	0.119	1.66052e-203
Arl4d	4.72441e-206	0.872151	0.459	0.249	9.44882e-203
Ifi27l2a	6.10912e-202	0.548386	0.808	0.648	1.22182e-198
Nptx2	4.92002e-200	0.232008	0.333	0.032	9.84003e-197
1700019D03Rik	1.0006e-197	0.955992	0.431	0.152	2.00121e-194
Akr1c18	6.54123e-191	0.689222	0.371	0.069	1.30825e-187
Crip1	5.94851e-184	0.699912	0.823	0.739	1.1897e-180
Car8	1.02383e-182	1.08481	0.459	0.161	2.04766e-179
Ackr1	1.59278e-180	0.649227	0.426	0.193	3.18555e-177
Atf3	1.6221e-173	0.707804	0.732	0.629	3.2442e-170
Plk2	3.19478e-171	0.446932	0.49	0.345	6.38956e-168
Bmp3	2.05691e-168	0.449575	0.346	0.039	4.11381e-165
Cxcl2	2.73359e-164	0.445626	0.447	0.291	5.46718e-161
Gm17056	7.58017e-164	0.496952	0.48	0.32	1.51603e-160
Itgb7	4.38632e-161	0.782823	0.403	0.14	8.77263e-158
Fez1	5.24579e-157	0.881537	0.441	0.221	1.04916e-153
Ndrg1	1.86595e-153	0.351751	0.474	0.3	3.7319e-150
Bmp7	1.20204e-149	0.572735	0.35	0.05	2.40408e-146
Sat1	1.22019e-141	0.627907	0.78	0.694	2.44038e-138
Col12a1	2.31288e-138	0.317385	0.194	0.295	4.62576e-135
Actb	1.5612e-137	0.349523	0.66	0.449	3.12239e-134
Gem	3.85452e-136	0.345959	0.6	0.427	7.70903e-133
Gan	9.28161e-136	0.598195	0.423	0.266	1.85632e-132
Nr4a1	4.79435e-126	0.537185	0.596	0.474	9.5887e-123
Dusp1	1.95596e-117	0.325077	0.82	0.698	3.91192e-114
Tgfb2	1.24124e-112	0.42661	0.39	0.22	2.48247e-109
Plac8	6.20143e-109	0.369692	0.531	0.352	1.24029e-105
Sfrp4	1.83993e-94	0.369855	0.404	0.209	3.67987e-91
Sult1e1	3.9015e-90	0.422357	0.321	0.101	7.80299e-87
Thbd	2.20328e-88	0.528238	0.488	0.367	4.40656e-85
Tnfaip6	1.9229e-87	0.8744	0.727	0.683	3.8458e-84
Lurap1l	5.60804e-87	0.872855	0.407	0.216	1.12161e-83
Ptgis	2.26343e-86	0.726409	0.431	0.289	4.52686e-83
Omd	4.14952e-85	0.211436	0.37	0.235	8.29903e-82
Actg1	3.31137e-84	0.4053	0.811	0.82	6.62274e-81
Dkk2	1.6961e-81	0.224178	0.369	0.195	3.3922e-78
Ier5	3.77714e-78	0.461555	0.725	0.679	7.55429e-75
Cdkn1c	2.64095e-72	0.60642	0.505	0.392	5.2819e-69
Vegfd	1.16295e-71	0.67847	0.431	0.29	2.3259e-68
Il6	3.52147e-71	0.604117	0.508	0.413	7.04294e-68
Abi3bp	2.08973e-68	0.277123	0.605	0.492	4.17945e-65
Chst1	4.92289e-67	0.74375	0.396	0.187	9.84577e-64
Lsmem1	1.54067e-66	0.337027	0.46	0.393	3.08135e-63
Glul	4.74137e-66	0.521565	0.675	0.628	9.48274e-63
Cdkn1a	3.69442e-63	0.547652	0.612	0.539	7.38885e-60
Tubb6	3.48766e-62	0.340412	0.619	0.544	6.97532e-59
Osr2	2.00298e-61	0.421207	0.353	0.228	4.00596e-58
Ildr2	2.03259e-60	0.76244	0.374	0.195	4.06518e-57
Matn4	4.929e-59	0.20708	0.215	0.232	9.85799e-56
Osr1	1.83701e-57	0.335638	0.39	0.235	3.67402e-54
Cxcl1	3.33609e-48	0.527132	0.76	0.687	6.67218e-45
Nov	2.68875e-45	0.587633	0.308	0.094	5.3775e-42
Zbp1	2.82094e-45	0.211855	0.308	0.401	5.64188e-42
Neat1	2.57245e-43	0.359215	0.662	0.585	5.14491e-40
Filip1l	9.93959e-42	0.35163	0.509	0.434	1.98792e-38
Gda	3.7729e-39	0.59326	0.337	0.192	7.54581e-36
Adamts1	7.97159e-39	0.397914	0.669	0.622	1.59432e-35
Gm31378	4.63568e-32	0.420263	0.349	0.191	9.27136e-29
Ier3	7.24564e-31	0.415085	0.627	0.573	1.44913e-27
Duoxa1	1.45426e-28	0.295095	0.284	0.057	2.90852e-25
Rcan1	1.1658e-27	0.245263	0.405	0.349	2.33159e-24
Cxcl13	9.18681e-26	1.05439	0.469	0.415	1.83736e-22
Cebpd	1.66806e-23	0.29512	0.742	0.74	3.33613e-20
H19	5.95176e-23	0.215724	0.308	0.197	1.19035e-19
Edn1	1.02714e-21	0.482273	0.215	0.1	2.05428e-18
Mt1	9.94834e-20	0.482515	0.82	0.773	1.98967e-16
Ppp1r15a	2.73793e-17	0.260201	0.719	0.705	5.47585e-14
Rspo3	1.37184e-15	0.512135	0.381	0.313	2.74367e-12
Junb	1.80087e-15	0.256726	0.85	0.812	3.60173e-12
Prkg2	2.42104e-14	0.729391	0.296	0.129	4.84208e-11
Tubb2a	2.51342e-14	0.269829	0.554	0.533	5.02684e-11
Prg4	4.9486e-14	0.468448	0.227	0.187	9.8972e-11
Lgals3	1.05906e-13	0.238382	0.275	0.311	2.11813e-10
Ptgs1	2.12846e-13	0.580779	0.316	0.211	4.25691e-10
Uchl1	7.36038e-13	0.700673	0.332	0.201	1.47208e-09
Cotl1	1.61561e-08	0.206421	0.515	0.5	3.23122e-05
Ramp1	6.33597e-08	0.399118	0.293	0.2	0.000126719
Gpc3	1.62438e-07	0.378761	0.48	0.47	0.000324877
Myoc	5.77024e-07	0.201318	0.32	0.271	0.00115405
Sdf2l1	1.23289e-06	0.207915	0.423	0.492	0.00246579
Ptx3	4.45919e-06	0.597565	0.418	0.395	0.00891839
Tob1	8.22177e-06	0.208011	0.554	0.537	0.0164435
Usp18	2.4125e-05	0.208352	0.313	0.337	0.04825
Zfp36	0.00044027	0.206287	0.695	0.682	0.880539
Gap43	0.0151592	0.359999	0.248	0.052	1
Ifrd1	0.0369605	0.312303	0.601	0.619	1
Tubb2b	0.213496	0.39643	0.271	0.207	1
Tnfsf9	0.282118	0.285963	0.388	0.387	1
Arl4a	0.385735	0.201556	0.506	0.546	1
Hs3st1	0.691136	0.325716	0.23	0.129	1

## Sheet: ASC3
	p_val	avg_logFC	pct.1	pct.2	p_val_adj
Mgp	0	2.11337	0.806	0.42	0
Inmt	0	2.10305	0.729	0.36	0
Gdf10	0	1.99821	0.725	0.237	0
Cst3	0	1.88845	0.977	0.77	0
C7	0	1.54453	0.707	0.28	0
Cd9	0	1.49178	0.811	0.462	0
Cilp	0	1.30728	0.562	0.191	0
Fhl2	0	0.480312	0.565	0.212	0
Gsn	1.65975e-298	0.836824	0.981	0.859	3.3195e-295
Chrdl1	4.8041e-292	1.4467	0.563	0.122	9.6082e-289
Mfap4	1.75474e-276	1.469	0.591	0.244	3.50947e-273
Gas6	3.316e-276	1.78295	0.696	0.398	6.632e-273
Cpe	5.65782e-275	1.30554	0.573	0.208	1.13156e-271
Fbln1	3.13945e-266	1.43325	0.7	0.391	6.2789e-263
Nbl1	7.99246e-260	1.0491	0.799	0.497	1.59849e-256
Penk	2.25661e-258	1.63317	0.609	0.233	4.51323e-255
Cfh	6.67426e-233	1.71554	0.62	0.267	1.33485e-229
Gadd45g	2.59307e-230	1.33627	0.859	0.692	5.18614e-227
Arhgdib	1.76674e-217	1.0203	0.522	0.173	3.53348e-214
Cryab	1.2625e-210	0.861994	0.774	0.492	2.52499e-207
Fxyd6	5.45487e-203	0.76918	0.527	0.229	1.09097e-199
Dkk2	3.94923e-193	0.225357	0.505	0.204	7.89847e-190
Tgfbi	8.75777e-191	1.42098	0.65	0.386	1.75155e-187
Nkain4	3.77825e-187	0.258269	0.409	0.09	7.55649e-184
Dcn	4.16426e-186	0.601509	0.965	0.871	8.32852e-183
Abi3bp	1.68645e-177	0.940376	0.716	0.494	3.37291e-174
Abcc9	1.59251e-163	0.616712	0.474	0.182	3.18502e-160
Apod	2.22368e-160	1.0378	0.792	0.549	4.44736e-157
Klf5	2.41803e-157	0.661164	0.456	0.128	4.83605e-154
Wisp2	2.20195e-154	0.71515	0.45	0.114	4.4039e-151
Pcdh11x	1.32399e-153	0.214967	0.418	0.099	2.64798e-150
Agt	2.15009e-146	0.468203	0.51	0.237	4.30017e-143
mt-Nd1	6.02333e-145	0.216249	0.603	0.386	1.20467e-141
Igfbp6	1.84025e-144	0.476148	0.891	0.62	3.68051e-141
C1qtnf3	1.3656e-138	0.574275	0.417	0.082	2.7312e-135
Sfrp1	8.11084e-137	0.998373	0.68	0.465	1.62217e-133
F3	4.43985e-133	1.08786	0.769	0.646	8.8797e-130
Rspo1	4.28761e-132	0.508108	0.442	0.129	8.57522e-129
Col14a1	2.94629e-130	0.537429	0.719	0.457	5.89257e-127
Olfml3	2.7099e-127	0.875933	0.66	0.421	5.4198e-124
Serpinb1a	3.29873e-125	0.358019	0.52	0.287	6.59747e-122
Gm13305	6.1572e-124	0.277278	0.438	0.184	1.23144e-120
Pltp	1.00372e-123	0.426891	0.502	0.254	2.00744e-120
Clec11a	1.87949e-122	1.49512	0.558	0.304	3.75898e-119
C4b	4.3982e-122	0.945448	0.608	0.362	8.79639e-119
Osr1	2.37436e-119	1.15365	0.525	0.24	4.74872e-116
Cxcl12	1.40498e-118	1.34691	0.735	0.623	2.80996e-115
Gas1	1.12132e-116	0.892628	0.74	0.604	2.24264e-113
Ecm1	1.87513e-113	0.91044	0.752	0.638	3.75025e-110
Col8a1	4.38557e-112	0.303798	0.455	0.205	8.77114e-109
Omd	1.49342e-111	0.37636	0.474	0.242	2.98685e-108
Fgl2	2.83231e-110	0.701682	0.561	0.32	5.66463e-107
Ecm2	5.98585e-108	0.703522	0.721	0.524	1.19717e-104
Clec1a	7.27328e-106	0.399668	0.485	0.226	1.45466e-102
Kcnj8	2.32365e-104	0.287795	0.428	0.202	4.6473e-101
Rbp1	2.38517e-104	1.09008	0.643	0.487	4.77034e-101
Gnai1	8.85542e-102	0.213886	0.234	0.307	1.77108e-98
Cpxm2	1.59204e-94	0.51209	0.494	0.28	3.18407e-91
Igf1	4.01611e-92	0.779266	0.791	0.671	8.03222e-89
Epha3	5.27706e-86	0.634251	0.403	0.083	1.05541e-82
Fmo2	9.07916e-85	1.52202	0.5	0.214	1.81583e-81
Id3	2.12927e-83	0.768539	0.865	0.733	4.25854e-80
Vit	1.41735e-79	1.12294	0.48	0.19	2.83469e-76
Cldn22	1.56999e-78	0.409436	0.34	0.027	3.13999e-75
Clec3b	1.64752e-75	0.328536	0.911	0.783	3.29504e-72
Itgbl1	4.1413e-74	1.1252	0.427	0.148	8.28259e-71
Pcsk5	4.97555e-68	0.427999	0.439	0.222	9.9511e-65
Sult1a1	2.22343e-67	0.387935	0.525	0.342	4.44686e-64
Eln	6.7671e-66	0.905919	0.593	0.405	1.35342e-62
Grem2	8.7826e-65	0.384394	0.222	0.054	1.75652e-61
Adm	2.338e-63	0.546125	0.523	0.34	4.67601e-60
Pdgfrl	4.34108e-61	0.951778	0.439	0.217	8.68216e-58
C2	4.83185e-59	1.07301	0.509	0.333	9.66371e-56
Ier3	3.84696e-58	0.372124	0.702	0.571	7.69392e-55
Podn	1.91992e-57	0.605165	0.611	0.452	3.83984e-54
Nr2f2	1.8561e-56	0.964227	0.455	0.247	3.71221e-53
Spp1	8.01368e-56	0.218385	0.369	0.197	1.60274e-52
Wfdc1	1.74334e-50	0.387023	0.422	0.216	3.48667e-47
Fam180a	7.99112e-50	0.21305	0.298	0.033	1.59822e-46
Ltbp4	1.85762e-49	0.828482	0.557	0.42	3.71523e-46
Pcolce2	4.66604e-47	0.368139	0.695	0.546	9.33208e-44
Col1a1	5.97879e-47	0.77039	0.943	0.849	1.19576e-43
Igfbp3	6.24711e-46	1.36677	0.431	0.217	1.24942e-42
Crip1	1.88219e-45	0.479243	0.9	0.742	3.76438e-42
Serpinb6c	1.44209e-43	0.256588	0.35	0.087	2.88419e-40
Gabra3	4.46091e-43	0.55789	0.41	0.188	8.92183e-40
Scg3	1.87856e-41	0.267833	0.385	0.187	3.75713e-38
Matn2	2.94117e-41	0.518311	0.471	0.309	5.88235e-38
Id4	1.30732e-40	0.395055	0.484	0.338	2.61464e-37
Cdh11	3.96956e-40	0.289149	0.239	0.226	7.93913e-37
Adh1	1.07661e-39	0.458034	0.49	0.313	2.15323e-36
Hmcn2	2.45769e-37	0.547574	0.432	0.252	4.91538e-34
Phlda3	4.74258e-36	0.539481	0.62	0.482	9.48516e-33
Gpc3	7.97432e-36	0.548493	0.581	0.459	1.59486e-32
Emp1	1.6555e-35	0.564893	0.723	0.616	3.31099e-32
Ramp1	1.59838e-34	0.45216	0.253	0.218	3.19675e-31
Abca8a	1.31077e-33	0.3662	0.762	0.645	2.62154e-30
Plscr2	1.46793e-33	0.204956	0.425	0.287	2.93587e-30
Dusp1	3.68703e-33	0.405199	0.822	0.716	7.37406e-30
Nr4a1	3.43809e-32	0.530758	0.6	0.492	6.87619e-29
Tsc22d1	3.4816e-32	0.323891	0.668	0.53	6.96321e-29
Angpt2	3.01336e-30	0.259414	0.32	0.049	6.02673e-27
Phlda1	7.40484e-30	0.521163	0.8	0.714	1.48097e-26
Hs3st1	1.86344e-29	0.233431	0.205	0.147	3.72688e-26
Gpnmb	2.09752e-29	0.701331	0.401	0.216	4.19503e-26
Ralgps2	4.73695e-29	0.363658	0.379	0.203	9.47391e-26
Ccdc3	5.57486e-29	0.455041	0.392	0.24	1.11497e-25
Mmp3	1.03707e-28	1.21368	0.443	0.273	2.07414e-25
Sfrp4	1.21706e-27	1.60445	0.438	0.234	2.43412e-24
Bhlhe40	2.34266e-27	0.261881	0.325	0.365	4.68532e-24
Plcxd3	1.00959e-23	0.386071	0.356	0.1	2.01919e-20
Pi15	4.26392e-23	0.373012	0.258	0.143	8.52784e-20
Ism1	9.28557e-23	0.491453	0.347	0.132	1.85711e-19
Icam1	8.74603e-22	0.329401	0.514	0.386	1.74921e-18
Lmo7	4.75704e-21	0.247169	0.294	0.112	9.51408e-18
Thbd	2.62159e-20	0.320151	0.362	0.401	5.24319e-17
Clu	4.78864e-20	0.512205	0.378	0.233	9.57728e-17
Ifitm1	1.93715e-19	0.57653	0.359	0.188	3.87431e-16
Sfrp2	1.49133e-18	1.23429	0.487	0.381	2.98266e-15
Ighm	1.90632e-18	0.250867	0.449	0.323	3.81264e-15
Nmb	1.43762e-17	0.415912	0.537	0.422	2.87524e-14
Cav2	4.22411e-17	0.209326	0.459	0.352	8.44821e-14
Slc2a1	1.89674e-16	0.304651	0.352	0.231	3.79348e-13
Id2	7.48763e-16	0.686992	0.582	0.543	1.49753e-12
Vtn	1.72202e-15	0.400654	0.299	0.287	3.44404e-12
Cfb	2.58328e-15	0.239905	0.368	0.252	5.16656e-12
Hmgcs2	1.32882e-14	0.464735	0.309	0.082	2.65765e-11
Lox	2.25053e-14	0.327668	0.446	0.331	4.50107e-11
Shox2	8.83781e-14	0.379703	0.225	0.165	1.76756e-10
Calm2	1.27295e-13	0.305703	0.846	0.78	2.54591e-10
Ace	2.66149e-13	0.218815	0.604	0.497	5.32299e-10
Tm4sf1	1.25691e-12	0.385834	0.605	0.52	2.51383e-09
Serpina3n	3.89864e-12	0.357056	0.372	0.231	7.79729e-09
Acp5	1.28821e-11	0.323031	0.306	0.307	2.57642e-08
Alkal2	2.46979e-11	0.211416	0.357	0.352	4.93957e-08
Wnt6	7.01574e-11	0.259175	0.234	0.075	1.40315e-07
Junb	9.15097e-10	0.337902	0.875	0.815	1.83019e-06
Prg4	3.11499e-09	0.450523	0.331	0.18	6.22998e-06
Sat1	4.84861e-09	0.294167	0.753	0.71	9.69722e-06
Sned1	1.29509e-08	0.304238	0.49	0.394	2.59018e-05
Ppm1n	3.31197e-08	0.207648	0.303	0.287	6.62394e-05
Ftl1	5.80769e-07	0.317008	0.959	0.922	0.00116154
Herpud1	1.21597e-06	0.356602	0.525	0.447	0.00243195
Rbp4	1.85793e-06	0.391337	0.443	0.474	0.00371587
Socs3	3.19396e-06	0.212547	0.772	0.728	0.00638792
Ppp1r15a	9.31367e-06	0.247905	0.756	0.702	0.0186273
Myl9	1.49408e-05	0.329186	0.498	0.428	0.0298817
Ndrg1	1.69618e-05	0.349698	0.431	0.331	0.0339236
Col4a4	3.74757e-05	0.293455	0.295	0.268	0.0749514
Ccl8	3.79643e-05	0.215918	0.275	0.271	0.0759286
Sdc4	4.95422e-05	0.203009	0.436	0.352	0.0990844
Cpz	9.36499e-05	0.5093	0.327	0.214	0.1873
Cd44	0.000120078	0.248283	0.411	0.325	0.240157
Cav1	0.000550559	0.342996	0.6	0.584	1
Ndrg2	0.00113603	0.47391	0.486	0.435	1
Myoc	0.00120277	0.36501	0.347	0.275	1
Ctgf	0.00183293	0.604007	0.333	0.187	1
Thbs4	0.00440457	0.642047	0.303	0.173	1
AC130815.2	0.0146292	0.283434	0.289	0.219	1
Cdh13	0.0168902	0.514161	0.317	0.171	1
Ctsk	0.0417644	0.236373	0.621	0.594	1
Cxcl13	0.0814959	0.942271	0.432	0.428	1
Bambi	0.082813	0.221653	0.372	0.34	1
Maged2	0.0838887	0.267577	0.495	0.509	1
Arl4a	0.0936725	0.330736	0.514	0.539	1
Avpr1a	0.115172	0.398888	0.32	0.229	1
Dbp	0.147795	0.328774	0.423	0.365	1
Angptl1	0.30566	0.227346	0.47	0.469	1
Il6	0.315474	0.216011	0.481	0.43	1
Srgn	0.405794	0.24731	0.402	0.357	1
H1f0	0.405848	0.321082	0.558	0.559	1
Tspan11	0.53761	0.730746	0.328	0.171	1
Gm26802	0.538846	0.418504	0.316	0.292	1
Errfi1	0.857181	0.248297	0.57	0.572	1
Sult1e1	0.992122	0.300694	0.296	0.137	1

## Sheet: Prolif_Nondiff
	p_val	avg_logFC	pct.1	pct.2	p_val_adj
Stmn1	0	2.22752	0.924	0.41	0
H2afz	0	1.9173	0.98	0.688	0
Cks2	0	1.74129	0.855	0.434	0
Birc5	0	1.60203	0.831	0.373	0
Top2a	0	1.59119	0.722	0.236	0
Cenpf	0	1.56805	0.701	0.183	0
Pclaf	0	1.50389	0.84	0.35	0
Mki67	0	1.47586	0.766	0.205	0
Hmgb2	0	1.4483	0.878	0.461	0
Smc4	0	1.41378	0.881	0.395	0
Selenoh	0	1.28004	0.914	0.491	0
Hmmr	0	1.26932	0.674	0.124	0
Smc2	0	1.26796	0.812	0.326	0
Tpx2	0	1.16053	0.669	0.193	0
Tk1	0	1.12024	0.76	0.261	0
Cenpm	0	1.02244	0.748	0.312	0
Ccna2	0	1.01897	0.647	0.125	0
Knl1	0	0.765264	0.574	0.102	0
Cep55	0	0.485019	0.458	0.047	0
Tubb5	5.83614e-301	1.52247	0.913	0.642	1.16723e-297
Dlgap5	7.48463e-300	0.483406	0.463	0.087	1.49693e-296
Ube2s	1.68905e-297	1.35347	0.94	0.69	3.3781e-294
Cdca3	5.25252e-293	1.25268	0.73	0.316	1.0505e-289
Pimreg	2.90206e-291	0.866736	0.57	0.134	5.80412e-288
Mxd3	5.3061e-291	0.974069	0.603	0.181	1.06122e-287
Racgap1	6.64681e-291	0.953096	0.634	0.199	1.32936e-287
Spc24	2.39497e-290	0.963447	0.678	0.235	4.78995e-287
Cdca8	3.92815e-289	1.207	0.701	0.289	7.85631e-286
Ska1	1.05676e-286	0.445404	0.438	0.063	2.11352e-283
Ran	3.16229e-284	1.00366	0.966	0.719	6.32458e-281
Knstrn	1.32067e-278	1.13196	0.675	0.266	2.64134e-275
Mis18bp1	7.48832e-277	0.593038	0.479	0.088	1.49766e-273
Cdk1	1.25553e-264	1.22691	0.688	0.28	2.51106e-261
Tubb6	4.66035e-264	1.1341	0.894	0.544	9.3207e-261
Pbk	2.07054e-263	0.71947	0.56	0.147	4.14109e-260
Cks1b	2.55113e-260	0.958412	0.917	0.575	5.10225e-257
Tagln2	1.35779e-259	1.08589	0.92	0.691	2.71558e-256
H2afv	2.89803e-257	1.13873	0.922	0.652	5.79606e-254
Cdc20	3.73443e-256	1.42865	0.668	0.28	7.46886e-253
Cenpe	3.89001e-256	1.24404	0.613	0.196	7.78002e-253
Ptma	6.84513e-250	0.831384	0.972	0.884	1.36903e-246
Spc25	2.93237e-249	0.857785	0.58	0.152	5.86474e-246
Cenpa	3.58605e-249	1.77487	0.717	0.388	7.1721e-246
Tuba1b	5.36252e-248	1.09541	0.924	0.708	1.0725e-244
Nuf2	1.09139e-247	0.662327	0.504	0.101	2.18277e-244
Kif11	6.78236e-243	0.572217	0.502	0.123	1.35647e-239
Ccnb2	1.23796e-236	1.27835	0.663	0.283	2.47592e-233
Prc1	2.122e-235	1.22663	0.592	0.177	4.24401e-232
Anp32b	1.98964e-233	0.896075	0.948	0.721	3.97928e-230
Aspm	2.04702e-231	0.788618	0.553	0.19	4.09403e-228
Esco2	1.28295e-230	0.574545	0.485	0.107	2.56591e-227
Timp1	4.29501e-230	1.33642	0.845	0.481	8.59003e-227
Ube2c	4.26409e-229	1.61395	0.666	0.306	8.52818e-226
Anln	7.02683e-229	0.775105	0.583	0.211	1.40537e-225
Kif20b	7.62172e-226	0.737307	0.53	0.151	1.52434e-222
Sgo2a	1.33236e-225	0.642803	0.483	0.085	2.66473e-222
H2afx	1.35143e-225	1.1061	0.708	0.342	2.70287e-222
Ccnb1	2.18274e-224	1.0222	0.582	0.211	4.36548e-221
Kif22	5.86894e-224	0.639499	0.512	0.117	1.17379e-220
Kif4	3.58829e-223	0.376457	0.435	0.079	7.17659e-220
Tmpo	6.65544e-217	1.03861	0.786	0.468	1.33109e-213
Ckap2	1.01166e-214	0.814078	0.566	0.211	2.02332e-211
Nucks1	5.29264e-214	0.875694	0.887	0.594	1.05853e-210
Cdkn3	4.6307e-212	0.974259	0.605	0.254	9.26139e-209
Lmnb1	5.3902e-211	0.835323	0.653	0.312	1.07804e-207
Tyms	1.70879e-210	0.880874	0.696	0.331	3.41757e-207
Dek	1.43324e-208	0.839709	0.868	0.493	2.86649e-205
Kif23	4.79223e-208	0.727117	0.483	0.104	9.58447e-205
Ccdc34	4.83255e-208	0.839562	0.77	0.388	9.66511e-205
Lsm2	7.98776e-207	0.748434	0.811	0.451	1.59755e-203
Melk	5.35195e-206	0.445411	0.421	0.067	1.07039e-202
C330027C09Rik	3.03517e-205	0.619196	0.516	0.152	6.07034e-202
Ckap2l	1.08684e-200	0.877233	0.569	0.206	2.17368e-197
Diaph3	7.01459e-199	0.653974	0.54	0.2	1.40292e-195
Slfn9	3.92087e-198	0.788325	0.675	0.34	7.84173e-195
Ranbp1	6.34902e-198	0.808074	0.933	0.693	1.2698e-194
Dnajc9	6.24295e-188	0.681412	0.687	0.34	1.24859e-184
Hist1h1b	1.40755e-187	0.382009	0.393	0.083	2.8151e-184
Kif15	1.2176e-184	0.372556	0.421	0.081	2.43521e-181
Bub1b	2.58441e-184	0.501199	0.462	0.122	5.16882e-181
Calm2	7.79009e-181	0.924936	0.919	0.781	1.55802e-177
H2-Q7	1.96633e-177	0.895491	0.853	0.577	3.93265e-174
Hmgb1	1.26322e-174	0.680474	0.925	0.718	2.52644e-171
Cdca2	1.77668e-174	0.395632	0.432	0.109	3.55335e-171
Plk1	5.4187e-174	0.708083	0.518	0.192	1.08374e-170
Rad51ap1	2.23499e-168	0.450321	0.459	0.121	4.46997e-165
Asf1b	1.96084e-165	0.481957	0.495	0.149	3.92168e-162
Ssrp1	6.14377e-162	0.631479	0.824	0.515	1.22875e-158
Ndc80	1.05042e-160	0.435352	0.395	0.077	2.10084e-157
Bst2	1.82553e-160	0.802755	0.911	0.675	3.65107e-157
Hmgn2	1.87947e-160	0.7895	0.745	0.455	3.75893e-157
Hdgf	1.11589e-158	0.706462	0.87	0.559	2.23178e-155
Lmna	7.27507e-158	0.762554	0.905	0.702	1.45501e-154
Cdkn2d	1.90113e-156	0.819228	0.641	0.347	3.80225e-153
Ppia	2.47466e-155	0.638173	0.967	0.86	4.94932e-152
Alyref	1.64033e-153	0.589323	0.734	0.402	3.28067e-150
Depdc1a	1.01173e-152	0.51747	0.401	0.076	2.02347e-149
Cenpn	3.18626e-152	0.463082	0.494	0.197	6.37252e-149
Lockd	1.13224e-151	0.868268	0.541	0.216	2.26449e-148
Pmf1	7.53936e-150	0.696365	0.653	0.409	1.50787e-146
Cdkn2c	8.0148e-148	0.752752	0.597	0.307	1.60296e-144
Kif2c	1.17706e-142	0.43762	0.391	0.082	2.35412e-139
Fam83d	6.37069e-141	0.30799	0.347	0.082	1.27414e-137
Sh3bgrl3	5.3666e-138	0.6975	0.912	0.753	1.07332e-134
Aurkb	3.13449e-136	0.551051	0.473	0.159	6.26899e-133
Mns1	5.3338e-136	0.356749	0.38	0.077	1.06676e-132
Plk4	9.46982e-136	0.524879	0.542	0.297	1.89396e-132
Ezh2	1.34476e-134	0.516731	0.57	0.295	2.68952e-131
Cdca5	5.5301e-134	0.215231	0.336	0.05	1.10602e-130
Hjurp	2.17028e-133	0.484456	0.576	0.276	4.34057e-130
Shcbp1	6.47666e-133	0.46102	0.433	0.125	1.29533e-129
Rrm2	6.18268e-131	0.59198	0.614	0.361	1.23654e-127
Usp1	8.35756e-131	0.55205	0.672	0.378	1.67151e-127
Dtymk	1.42211e-130	0.519166	0.802	0.49	2.84423e-127
Snrpd1	1.17552e-129	0.521615	0.857	0.598	2.35105e-126
Gins2	1.24452e-127	0.606449	0.56	0.285	2.48904e-124
Gmnn	5.55525e-127	0.575397	0.58	0.321	1.11105e-123
Lig1	1.26194e-124	0.555274	0.549	0.299	2.52388e-121
Cenpq	1.29471e-124	0.619687	0.546	0.308	2.58942e-121
Ncapg	1.39766e-124	0.465178	0.412	0.101	2.79532e-121
Anp32e	1.47569e-124	0.561937	0.709	0.454	2.95137e-121
Rangap1	1.91013e-124	0.581775	0.569	0.302	3.82026e-121
Rad21	5.67493e-124	0.590508	0.642	0.362	1.13499e-120
Ube2t	2.00159e-122	0.320799	0.399	0.107	4.00318e-119
Mis18a	1.90602e-121	0.454265	0.501	0.248	3.81204e-118
Rrm1	2.4127e-121	0.622146	0.579	0.32	4.82539e-118
Nxt1	3.06686e-119	0.456924	0.592	0.319	6.13372e-116
Tubb4b	6.81583e-119	0.888533	0.81	0.622	1.36317e-115
Tipin	1.07462e-118	0.439315	0.682	0.391	2.14924e-115
Dut	1.45143e-118	0.542363	0.71	0.438	2.90287e-115
Spdl1	7.92367e-118	0.334106	0.359	0.084	1.58473e-114
Hnrnpab	2.19978e-117	0.509351	0.868	0.618	4.39956e-114
Incenp	4.87554e-117	0.519026	0.468	0.218	9.75107e-114
Tacc3	5.41354e-117	0.684354	0.513	0.238	1.08271e-113
Cdk4	7.56233e-115	0.52497	0.886	0.668	1.51247e-111
Sapcd2	1.11947e-114	0.258637	0.276	0.027	2.23893e-111
Rfc2	3.07168e-114	0.494097	0.642	0.385	6.14335e-111
Aurka	1.48481e-112	0.578548	0.473	0.221	2.96961e-109
Bub3	2.08399e-109	0.531838	0.684	0.405	4.16797e-106
Naa50	1.01399e-106	0.510693	0.791	0.518	2.02798e-103
Lsm5	2.03448e-104	0.463078	0.671	0.39	4.06897e-101
Prr11	9.49968e-104	0.374725	0.363	0.105	1.89994e-100
Bub1	2.18698e-103	0.377685	0.378	0.09	4.37395e-100
Nusap1	5.26293e-103	0.736707	0.447	0.17	1.05259e-99
Nsd2	4.9136e-101	0.483197	0.539	0.314	9.82721e-98
Tnc	4.04169e-99	0.880376	0.539	0.273	8.08337e-96
H2-Q6	8.299e-98	0.606687	0.67	0.447	1.6598e-94
Fam111a	1.65591e-97	0.433534	0.613	0.369	3.31183e-94
Fen1	5.06652e-97	0.406753	0.466	0.248	1.0133e-93
Gemin6	6.83449e-97	0.338629	0.504	0.287	1.3669e-93
Dhfr	2.11216e-94	0.466865	0.526	0.335	4.22433e-91
H3f3b	4.69011e-94	0.472678	0.944	0.878	9.38023e-91
Kifc1	8.30235e-94	0.232287	0.293	0.05	1.66047e-90
Cit	9.97993e-94	0.387887	0.411	0.16	1.99599e-90
Rfc5	4.38294e-93	0.542143	0.535	0.324	8.76588e-90
Rfc4	4.48552e-93	0.41758	0.54	0.327	8.97104e-90
Atad2	8.92471e-93	0.561847	0.531	0.326	1.78494e-89
Arhgap11a	1.37593e-92	0.438479	0.426	0.187	2.75187e-89
Tmem176b	2.22286e-92	0.477453	0.876	0.667	4.44572e-89
Pgp	2.30524e-91	0.423772	0.706	0.461	4.61048e-88
Anapc15	4.67049e-91	0.52941	0.558	0.358	9.34097e-88
Emp1	1.08247e-90	0.43793	0.835	0.617	2.16494e-87
Ctsc	3.06407e-90	0.529624	0.623	0.375	6.12814e-87
Nek2	6.82374e-90	0.34153	0.331	0.052	1.36475e-86
Ccl2	6.97941e-89	1.17732	0.69	0.517	1.39588e-85
Cxcl9	1.98719e-88	0.663078	0.743	0.537	3.97438e-85
Hnrnpa1	2.37908e-88	0.495033	0.869	0.708	4.75815e-85
Mad2l1	6.58455e-87	0.556863	0.466	0.227	1.31691e-83
Ect2	9.90833e-87	0.416331	0.372	0.107	1.98167e-83
Tmem176a	1.14748e-86	0.564594	0.803	0.591	2.29496e-83
Sae1	1.2013e-86	0.461324	0.658	0.435	2.40259e-83
2022-03-05	7.37575e-86	0.413941	0.791	0.535	1.47515e-82
Mrpl18	8.87725e-86	0.337765	0.81	0.516	1.77545e-82
Tuba1a	5.51088e-85	0.389337	0.941	0.816	1.10218e-81
Haus8	7.43183e-85	0.284367	0.455	0.269	1.48637e-81
Lrrc59	4.02803e-84	0.394248	0.716	0.455	8.05607e-81
Bok	8.01631e-83	0.453519	0.483	0.272	1.60326e-79
Lsm3	2.33638e-82	0.373232	0.686	0.44	4.67275e-79
Lypd1	2.50366e-82	0.506355	0.624	0.423	5.00733e-79
Angptl4	3.10357e-82	0.493919	0.762	0.472	6.20714e-79
Dctpp1	4.22003e-82	0.341035	0.661	0.423	8.44006e-79
Zbp1	6.02196e-82	0.385496	0.598	0.366	1.20439e-78
Set	6.60441e-82	0.399763	0.822	0.567	1.32088e-78
Cmc2	1.43763e-81	0.351392	0.57	0.349	2.87526e-78
Rpa2	1.47012e-81	0.437489	0.511	0.31	2.94024e-78
Plpp1	8.10911e-80	0.388169	0.747	0.497	1.62182e-76
Hnrnpf	1.76697e-79	0.415704	0.867	0.688	3.53393e-76
Arl6ip1	2.00024e-79	1.02424	0.822	0.681	4.00049e-76
Mcm7	6.02746e-79	0.36412	0.497	0.297	1.20549e-75
Srsf7	1.70531e-78	0.388048	0.815	0.639	3.41062e-75
Actg1	2.25596e-78	0.635024	0.909	0.813	4.51192e-75
Kif20a	1.68065e-77	0.658169	0.436	0.179	3.3613e-74
Adam12	5.09847e-75	0.378643	0.634	0.429	1.01969e-71
U2af1	1.57152e-74	0.355272	0.823	0.604	3.14303e-71
Hmgb3	5.01873e-74	0.39608	0.527	0.316	1.00375e-70
Lsm4	1.09191e-73	0.34683	0.847	0.667	2.18382e-70
Rtp4	1.57049e-73	0.323755	0.734	0.485	3.14098e-70
Ddx39	1.50801e-72	0.373169	0.56	0.385	3.01601e-69
Lyar	1.9363e-72	0.302501	0.652	0.415	3.87261e-69
Cacybp	4.97641e-72	0.32842	0.749	0.522	9.95281e-69
Dscc1	5.70801e-72	0.223232	0.35	0.111	1.1416e-68
Hat1	5.79046e-72	0.457254	0.556	0.391	1.15809e-68
Isg15	2.73858e-71	0.619749	0.749	0.576	5.47716e-68
Fbxo5	4.0303e-71	0.340787	0.401	0.212	8.0606e-68
Tpm2	5.31872e-71	0.442124	0.609	0.464	1.06374e-67
Mthfd2	7.56649e-71	0.317903	0.528	0.374	1.5133e-67
Gbp3	2.05099e-70	0.338502	0.585	0.375	4.10199e-67
Csrp1	1.9168e-69	0.309061	0.634	0.433	3.8336e-66
Tnfrsf12a	2.0973e-69	0.251647	0.546	0.364	4.1946e-66
Cxcl10	2.78908e-69	0.712432	0.672	0.498	5.57816e-66
Hsp90aa1	1.11353e-68	0.370839	0.917	0.795	2.22706e-65
Cd44	1.44958e-68	0.278874	0.522	0.325	2.89916e-65
Psrc1	2.59782e-68	0.420828	0.375	0.134	5.19565e-65
Psmb8	8.91929e-68	0.404492	0.869	0.736	1.78386e-64
Irf7	6.10133e-67	0.44376	0.715	0.495	1.22027e-63
Lgmn	3.87366e-66	0.373724	0.69	0.457	7.74731e-63
Serbp1	1.83563e-65	0.370088	0.888	0.745	3.67125e-62
Eif2s1	2.01259e-65	0.22789	0.629	0.403	4.02519e-62
Siva1	2.14153e-65	0.415529	0.703	0.49	4.28305e-62
Hnrnpa2b1	2.18856e-65	0.378078	0.896	0.801	4.37712e-62
Cxcl16	2.94796e-65	0.329989	0.629	0.413	5.89593e-62
Snrpe	3.4554e-65	0.335903	0.838	0.655	6.91081e-62
Cotl1	4.08627e-65	0.379452	0.702	0.493	8.17254e-62
Uhrf2	1.48982e-64	0.431956	0.645	0.439	2.97964e-61
Fzd1	1.98913e-64	0.344042	0.526	0.322	3.97825e-61
Sgo1	3.681e-64	0.307563	0.349	0.122	7.362e-61
Cenpp	6.98705e-64	0.369058	0.398	0.184	1.39741e-60
Cdc25c	1.9527e-63	0.327064	0.316	0.056	3.90539e-60
Ncapg2	2.88176e-62	0.366029	0.453	0.287	5.76352e-59
Cenph	6.5159e-62	0.365029	0.38	0.137	1.30318e-58
Postn	1.1124e-61	0.477843	0.741	0.574	2.22481e-58
Pa2g4	4.2489e-61	0.225331	0.699	0.482	8.49779e-58
G3bp1	2.0082e-60	0.314607	0.787	0.603	4.01639e-57
Neil3	4.99548e-60	0.342731	0.307	0.049	9.99096e-57
Mcm6	8.80231e-60	0.471488	0.451	0.284	1.76046e-56
Haus4	3.85934e-59	0.435527	0.436	0.258	7.71868e-56
Cthrc1	3.98151e-59	0.541398	0.482	0.261	7.96301e-56
Tcp1	4.64748e-59	0.263178	0.8	0.582	9.29497e-56
Sdc1	8.26037e-59	0.492941	0.583	0.418	1.65207e-55
Rpa1	1.20016e-58	0.326159	0.442	0.286	2.40032e-55
Cenpw	6.57417e-58	0.482948	0.453	0.28	1.31483e-54
Ubald2	1.04246e-57	0.466673	0.638	0.479	2.08492e-54
Stat1	2.88337e-57	0.296891	0.635	0.442	5.76674e-54
Hist1h4i	3.12771e-57	0.357316	0.443	0.271	6.25542e-54
Iqgap3	2.05364e-56	0.230543	0.27	0.043	4.10728e-53
Tap1	3.32236e-56	0.300657	0.593	0.425	6.64473e-53
Rnf213	3.41902e-56	0.273825	0.572	0.379	6.83803e-53
Nup43	9.61203e-56	0.211655	0.394	0.255	1.92241e-52
Gas2l3	1.33665e-55	0.33744	0.339	0.121	2.6733e-52
Ndc1	1.42194e-55	0.337876	0.461	0.329	2.84388e-52
Clspn	9.19145e-55	0.412607	0.411	0.213	1.83829e-51
Ankle1	1.5995e-54	0.247548	0.328	0.097	3.199e-51
Tmem119	4.10587e-54	0.385698	0.608	0.422	8.21173e-51
Tcf19	4.32661e-54	0.500662	0.468	0.313	8.65322e-51
Mpp6	9.25145e-54	0.21989	0.505	0.345	1.85029e-50
2022-09-09	9.52676e-54	0.371638	0.526	0.374	1.90535e-50
Ddx39b	2.91383e-53	0.262463	0.703	0.512	5.82766e-50
Mcm4	5.02031e-53	0.300728	0.438	0.3	1.00406e-49
Iigp1	7.13119e-53	0.308715	0.759	0.563	1.42624e-49
Phf11d	7.38095e-53	0.315077	0.529	0.354	1.47619e-49
Uhrf1	1.20658e-51	0.36931	0.428	0.213	2.41316e-48
Snrpa1	3.66907e-51	0.280555	0.625	0.463	7.33813e-48
Mrpl51	4.32826e-51	0.252975	0.767	0.55	8.65651e-48
Npm3	9.35216e-51	0.289393	0.744	0.586	1.87043e-47
Ripk3	9.73604e-51	0.357848	0.436	0.287	1.94721e-47
Cdc45	1.02655e-50	0.217169	0.343	0.158	2.0531e-47
Pold2	1.25934e-50	0.231991	0.488	0.341	2.51868e-47
Manf	1.90494e-50	0.331558	0.863	0.731	3.80988e-47
Mrpl42	2.13873e-50	0.213126	0.801	0.57	4.27746e-47
Ccnd2	3.90552e-50	0.376055	0.812	0.635	7.81103e-47
Hsp90ab1	4.38032e-50	0.277074	0.948	0.892	8.76064e-47
Xaf1	5.70023e-50	0.31598	0.614	0.439	1.14005e-46
Impdh2	9.34166e-50	0.209117	0.769	0.561	1.86833e-46
Prim1	1.17151e-49	0.34215	0.459	0.34	2.34302e-46
Oasl2	1.25436e-49	0.24155	0.565	0.37	2.50873e-46
Nme1	3.30766e-49	0.32342	0.829	0.724	6.61532e-46
Rnaseh2c	5.36187e-49	0.268076	0.707	0.552	1.07237e-45
Tor3a	3.95671e-48	0.213917	0.52	0.347	7.91342e-45
Mndal	4.05799e-48	0.282313	0.747	0.565	8.11598e-45
Plin2	1.37284e-47	0.29091	0.792	0.643	2.74568e-44
Topbp1	3.09639e-47	0.328066	0.474	0.348	6.19277e-44
Atp5g3	2.67448e-46	0.25523	0.828	0.644	5.34895e-43
Trip13	5.83734e-46	0.311948	0.362	0.176	1.16747e-42
Nt5dc2	1.32316e-45	0.381211	0.509	0.383	2.64631e-42
Pfdn6	4.1083e-45	0.202593	0.719	0.547	8.21659e-42
Ubd	1.03965e-44	0.529429	0.422	0.208	2.0793e-41
Srsf1	3.16208e-44	0.313689	0.606	0.469	6.32416e-41
Dbf4	3.2459e-44	0.511871	0.414	0.256	6.49181e-41
Idh2	5.14182e-44	0.346196	0.727	0.59	1.02836e-40
Cenps	8.53841e-44	0.345981	0.384	0.181	1.70768e-40
Psmb9	2.77529e-43	0.336317	0.697	0.555	5.55057e-40
Psma1	8.60029e-43	0.231671	0.776	0.586	1.72006e-39
Chaf1a	1.07031e-42	0.344102	0.394	0.255	2.14062e-39
S1pr3	1.19059e-42	0.32878	0.5	0.374	2.38117e-39
Trim59	3.86798e-42	0.343102	0.382	0.217	7.73597e-39
Nop58	6.27766e-42	0.200254	0.709	0.555	1.25553e-38
Tuba1c	1.03143e-41	0.257475	0.381	0.261	2.06285e-38
Mcm3	1.06654e-41	0.412132	0.452	0.338	2.13307e-38
Npm1	1.3709e-41	0.230975	0.893	0.77	2.7418e-38
Orc6	1.53001e-41	0.242497	0.531	0.394	3.06002e-38
H2-K1	1.57421e-41	0.310624	0.889	0.834	3.14842e-38
Lbh	1.76132e-41	0.225637	0.437	0.315	3.52263e-38
Plvap	3.38122e-41	0.268539	0.49	0.346	6.76243e-38
Pycard	9.50488e-41	0.336138	0.555	0.405	1.90098e-37
Srsf3	1.57922e-39	0.265765	0.845	0.739	3.15843e-36
Chaf1b	1.28984e-38	0.313909	0.357	0.178	2.57968e-35
Eif5a	1.91987e-38	0.274567	0.903	0.815	3.83974e-35
Snrpf	4.62984e-38	0.216711	0.788	0.638	9.25968e-35
Cstb	1.86297e-37	0.304536	0.819	0.68	3.72593e-34
Cited1	3.79047e-37	0.223787	0.402	0.288	7.58095e-34
Slbp	4.16408e-37	0.332699	0.558	0.418	8.32815e-34
H1f0	5.29815e-37	0.3736	0.711	0.55	1.05963e-33
Nasp	6.70545e-36	0.358264	0.576	0.477	1.34109e-32
Ccl7	6.77401e-36	0.480395	0.667	0.565	1.3548e-32
Vars	3.25091e-35	0.214077	0.512	0.415	6.50183e-32
Baz1a	5.05513e-35	0.208527	0.469	0.353	1.01103e-31
Col18a1	6.2074e-35	0.323192	0.616	0.474	1.24148e-31
Creld2	1.02541e-34	0.221898	0.591	0.471	2.05081e-31
Tpm1	1.40636e-34	0.27935	0.623	0.502	2.81273e-31
Hist1h1e	5.95666e-34	0.509463	0.511	0.447	1.19133e-30
Mcm2	7.75492e-34	0.264164	0.394	0.277	1.55098e-30
Cldn5	1.06221e-33	0.482972	0.214	0.386	2.12443e-30
Ppil1	5.71857e-33	0.261198	0.467	0.348	1.14371e-29
Lmnb2	8.23452e-33	0.256139	0.374	0.274	1.6469e-29
Hirip3	6.74811e-32	0.308311	0.406	0.318	1.34962e-28
Car13	1.23968e-31	0.264977	0.431	0.314	2.47936e-28
Dnmt1	2.31513e-31	0.277277	0.414	0.319	4.63027e-28
Ifi44	3.00644e-30	0.26327	0.378	0.217	6.01288e-27
Saa3	3.04453e-30	0.88364	0.449	0.334	6.08906e-27
Tgm2	1.59417e-29	0.204893	0.447	0.341	3.18834e-26
Rfc3	3.27001e-29	0.286357	0.387	0.298	6.54001e-26
Palld	7.67647e-29	0.220469	0.457	0.316	1.53529e-25
Ncaph	5.60259e-27	0.260721	0.293	0.096	1.12052e-23
Hspa8	6.60696e-27	0.292425	0.87	0.831	1.32139e-23
Ass1	1.1193e-26	0.487081	0.473	0.394	2.2386e-23
Dnph1	1.15753e-26	0.210024	0.337	0.173	2.31506e-23
Trabd2b	1.83648e-26	0.274975	0.475	0.352	3.67296e-23
Mcm5	3.24664e-26	0.442933	0.424	0.315	6.49329e-23
Pcna	1.81305e-25	0.313668	0.434	0.347	3.6261e-22
Cenpu	1.54685e-24	0.269373	0.328	0.181	3.0937e-21
Nrm	4.67476e-24	0.341066	0.405	0.318	9.34952e-21
Brca2	1.74083e-22	0.253414	0.374	0.287	3.48166e-19
Psat1	2.32526e-22	0.254075	0.449	0.375	4.65052e-19
Pola1	1.8829e-21	0.248321	0.401	0.341	3.76579e-18
Tubb2a	3.26095e-21	0.225742	0.614	0.534	6.52189e-18
Adamts4	7.9792e-21	0.212682	0.418	0.332	1.59584e-17
Thbs1	2.02711e-20	0.285289	0.485	0.399	4.05422e-17
Rad51	6.59029e-20	0.345406	0.338	0.159	1.31806e-16
Ccl9	1.64182e-19	0.249667	0.316	0.204	3.28363e-16
Mms22l	6.91177e-19	0.219093	0.3	0.163	1.38235e-15
Rsad2	1.00406e-18	0.329977	0.386	0.311	2.00813e-15
Psmc3ip	1.74435e-18	0.258503	0.364	0.29	3.48869e-15
Rad54l	7.72007e-18	0.219997	0.288	0.119	1.54401e-14
Cenpk	5.37317e-17	0.31971	0.347	0.251	1.07463e-13
Ncapd3	7.29233e-16	0.245156	0.298	0.222	1.45847e-12
Tubb3	3.25111e-14	0.21718	0.332	0.277	6.50221e-11
Nes	9.59206e-14	0.214834	0.323	0.223	1.91841e-10
Ncapd2	1.24379e-12	0.375245	0.355	0.29	2.48758e-09
Noct	5.21794e-11	0.219943	0.353	0.297	1.04359e-07
Oip5	5.46681e-11	0.208366	0.275	0.135	1.09336e-07
Dtl	9.3239e-11	0.218477	0.282	0.178	1.86478e-07
Ccne1	1.79558e-09	0.204323	0.32	0.217	3.59117e-06
H1fx	2.46086e-09	0.267779	0.322	0.284	4.92173e-06
Bora	1.23052e-08	0.236416	0.298	0.254	2.46104e-05
Zfp367	1.83047e-08	0.302454	0.293	0.238	3.66094e-05
Troap	2.34476e-07	0.222068	0.249	0.09	0.000468952
Tagln	2.16883e-06	0.409688	0.296	0.403	0.00433766
Acta2	6.14505e-06	0.625149	0.418	0.428	0.0122901
Hells	1.94595e-05	0.372011	0.368	0.318	0.038919
Syce2	3.44818e-05	0.289063	0.344	0.33	0.0689636
Gpihbp1	5.7829e-05	0.241498	0.302	0.392	0.115658
Egfl7	0.000364435	0.249977	0.321	0.408	0.728869
Spp1	0.00117754	0.327905	0.259	0.214	1
Ung	0.0107996	0.241981	0.322	0.291	1
Cdt1	0.114521	0.233882	0.299	0.259	1
Tm4sf1	0.116653	0.209583	0.462	0.534	1
H2-M2	0.137975	0.201079	0.232	0.124	1
Ccl5	0.167127	0.852664	0.227	0.27	1
Cma1	0.643364	0.830557	0.278	0.332	1
Mastl	0.816473	0.207969	0.24	0.186	1
Spag5	0.893071	0.223968	0.223	0.103	1

## Sheet: Prolif_Diff
	p_val	avg_logFC	pct.1	pct.2	p_val_adj
Car3	0	4.60602	0.923	0.188	0
Fabp4	0	4.03688	0.946	0.381	0
Fabp5	0	3.29591	0.91	0.411	0
Adipoq	0	2.54705	0.872	0.345	0
Hspd1	0	2.34767	0.982	0.519	0
Cox5a	0	2.14385	0.942	0.593	0
Rgcc	0	2.10878	0.939	0.489	0
Nnat	0	2.00155	0.793	0.463	0
Slc25a5	0	1.90084	0.981	0.654	0
Idh3a	0	1.88842	0.925	0.408	0
Chchd10	0	1.84621	0.623	0.295	0
Cyc1	0	1.84163	0.946	0.542	0
Gpd1	0	1.81851	0.785	0.288	0
Hspe1	0	1.81735	0.978	0.645	0
Atp5b	0	1.72225	0.963	0.7	0
Ndufab1	0	1.68029	0.948	0.551	0
Uqcrfs1	0	1.6111	0.92	0.498	0
Mdh2	0	1.56385	0.952	0.572	0
Ran	0	1.55561	0.981	0.698	0
Acsl1	0	1.52957	0.829	0.283	0
Mrpl12	0	1.51922	0.957	0.514	0
Atp5o.1	0	1.49682	0.931	0.644	0
Mcrip2	0	1.4696	0.907	0.363	0
H2afz	0	1.45712	0.897	0.677	0
Ak2	0	1.4545	0.934	0.444	0
Npm1	0	1.4427	0.978	0.748	0
Etfb	0	1.42771	0.916	0.545	0
C1qbp	0	1.41248	0.958	0.472	0
Atp5f1	0	1.4064	0.97	0.696	0
Phb2	0	1.39079	0.968	0.603	0
Cycs	0	1.3893	0.871	0.474	0
Rbp4	0	1.37674	0.916	0.41	0
Prkar2b	0	1.37501	0.928	0.412	0
Agpat2	0	1.35441	0.866	0.394	0
Atp5d	0	1.35255	0.968	0.703	0
Sdhd	0	1.3515	0.901	0.479	0
Ndufb9	0	1.3456	0.94	0.688	0
Sod2	0	1.34095	0.915	0.577	0
Phgdh	0	1.33695	0.92	0.441	0
Tomm20	0	1.33673	0.973	0.603	0
Atp5a1	0	1.33389	0.945	0.7	0
Pla2g16	0	1.32865	0.922	0.56	0
Chchd2	0	1.32561	0.981	0.825	0
Hspa9	0	1.32504	0.939	0.549	0
Plin1	0	1.30868	0.829	0.344	0
Dbi	0	1.29629	0.906	0.678	0
Cebpa	0	1.29109	0.905	0.412	0
Cox4i1	0	1.27741	0.966	0.796	0
Ncl	0	1.27386	0.95	0.688	0
Cox8a	0	1.27025	0.969	0.752	0
G0s2	0	1.26786	0.901	0.616	0
Mdh1	0	1.26469	0.825	0.534	0
Mif	0	1.25221	0.969	0.64	0
Scp2	0	1.24638	0.948	0.654	0
Ndufs7	0	1.23118	0.923	0.571	0
Tpi1	0	1.22963	0.939	0.613	0
Ndufb10	0	1.22881	0.934	0.662	0
Aco2	0	1.20978	0.825	0.425	0
Mrap	0	1.19976	0.822	0.327	0
Mrpl18	0	1.18669	0.928	0.477	0
Uqcrq	0	1.18533	0.902	0.657	0
Hadh	0	1.17335	0.915	0.495	0
Nhp2	0	1.17325	0.955	0.514	0
Grpel1	0	1.15672	0.926	0.53	0
Ndufc2	0	1.15048	0.919	0.641	0
Timm8a1	0	1.13732	0.873	0.363	0
Ldha	0	1.13433	0.972	0.713	0
Eif4ebp1	0	1.13339	0.955	0.615	0
Sdhb	0	1.13012	0.921	0.582	0
Tomm40	0	1.12967	0.921	0.435	0
Pnpla2	0	1.11932	0.794	0.38	0
Rrm2	0	1.11848	0.694	0.33	0
Ndufa8	0	1.11734	0.944	0.669	0
Uqcrc2	0	1.11623	0.852	0.511	0
Ldhb	0	1.10636	0.857	0.474	0
Pgam1	0	1.10611	0.943	0.57	0
Uqcrc1	0	1.10199	0.906	0.562	0
Aldoa	0	1.09544	0.978	0.753	0
Atp5h	0	1.09287	0.944	0.737	0
Arxes2	0	1.09149	0.83	0.333	0
Immt	0	1.08656	0.899	0.398	0
Birc5	0	1.08167	0.7	0.355	0
Eif5a	0	1.0774	0.98	0.798	0
Ndufb5	0	1.07655	0.931	0.628	0
Ndufb6	0	1.07246	0.89	0.565	0
Pclaf	0	1.06691	0.711	0.33	0
Nme1	0	1.06382	0.96	0.697	0
Lipe	0	1.06036	0.787	0.351	0
Tomm5	0	1.05898	0.955	0.607	0
Mpc2	0	1.05268	0.917	0.636	0
Ppia	0	1.04891	0.989	0.849	0
Cox6b1	0	1.04703	0.937	0.716	0
Set	0	1.04579	0.936	0.531	0
Pgk1	0	1.04017	0.927	0.552	0
Uqcr11	0	1.04011	0.905	0.627	0
Slc25a3	0	1.0364	0.974	0.773	0
Atp5c1	0	1.0363	0.969	0.729	0
Arxes1	0	1.03063	0.804	0.311	0
Suclg1	0	1.03043	0.881	0.5	0
Dctpp1	0	1.02702	0.875	0.375	0
Serbp1	0	1.02431	0.972	0.722	0
Hmgb2	0	1.02378	0.739	0.447	0
Hsp90ab1	0	1.01904	0.989	0.882	0
Eno1	0	1.01889	0.872	0.382	0
Uqcr10	0	1.01163	0.894	0.667	0
Hsp90aa1	0	1.00976	0.973	0.778	0
Ranbp1	0	1.00767	0.947	0.672	0
Cs	0	1.00377	0.895	0.426	0
Ndufv2	0	0.997051	0.914	0.641	0
Anp32b	0	0.99487	0.949	0.703	0
Mrpl42	0	0.983115	0.945	0.532	0
Hmgb3	0	0.982946	0.759	0.268	0
Vdac2	0	0.978885	0.929	0.558	0
Eif4a1	0	0.971755	0.961	0.78	0
Ndufs2	0	0.968555	0.912	0.582	0
Tk1	0	0.965046	0.728	0.227	0
Cox7b	0	0.964411	0.906	0.649	0
Ppp1r1a	0	0.961996	0.737	0.282	0
Reep6	0	0.96025	0.769	0.238	0
Ndufa12	0	0.957292	0.912	0.591	0
Cisd1	0	0.956184	0.933	0.474	0
Cluh	0	0.948026	0.798	0.309	0
Hspa8	0	0.94701	0.948	0.817	0
Adig	0	0.944001	0.653	0.304	0
Tomm22	0	0.941683	0.927	0.575	0
Cox5b	0	0.939891	0.918	0.646	0
Glrx5	0	0.938096	0.943	0.533	0
Cacybp	0	0.93693	0.913	0.481	0
Echs1	0	0.932177	0.913	0.514	0
Cox7c	0	0.92893	0.944	0.758	0
Mrpl20	0	0.928651	0.946	0.589	0
Ndufa4	0	0.928567	0.954	0.744	0
Top2a	0	0.926232	0.598	0.215	0
Fh1	0	0.919625	0.825	0.351	0
Emc6	0	0.918666	0.899	0.393	0
Timm13	0	0.905737	0.942	0.658	0
Prmt1	0	0.904335	0.918	0.504	0
Ndufa10	0	0.899659	0.897	0.471	0
Taldo1	0	0.894613	0.841	0.571	0
Cdca3	0	0.890515	0.687	0.29	0
Tcp1	0	0.885831	0.941	0.546	0
Txn2	0	0.884692	0.947	0.567	0
Timm50	0	0.883743	0.859	0.365	0
Cox7a2	0	0.883425	0.91	0.702	0
Ndufaf4	0	0.883166	0.845	0.373	0
Mtch2	0	0.881967	0.926	0.552	0
Acadm	0	0.878495	0.762	0.413	0
Mrps36	0	0.875984	0.873	0.415	0
Uqcrb	0	0.875425	0.881	0.666	0
Eci1	0	0.873928	0.861	0.446	0
Timm17a	0	0.868979	0.92	0.479	0
Vdac1	0	0.863476	0.912	0.529	0
Cct3	0	0.863219	0.924	0.523	0
Pa2g4	0	0.858962	0.878	0.44	0
Fkbp4	0	0.855346	0.902	0.503	0
Dnajc15	0	0.855261	0.853	0.392	0
Timm10	0	0.855126	0.793	0.342	0
Srm	0	0.850417	0.91	0.499	0
Dtymk	0	0.847601	0.898	0.452	0
Mrpl34	0	0.845757	0.839	0.423	0
Ndufs3	0	0.842183	0.902	0.563	0
Cd36	0	0.835506	0.761	0.452	0
Ube2s	0	0.830277	0.881	0.679	0
Gsto1	0	0.82951	0.859	0.366	0
Cks2	0	0.827257	0.777	0.412	0
Cox14	0	0.823372	0.946	0.619	0
Atad3a	0	0.82325	0.806	0.353	0
Ndufb8	0	0.822887	0.899	0.645	0
Selenoh	0	0.812898	0.881	0.463	0
Bola3	0	0.811993	0.91	0.489	0
Pparg	0	0.808058	0.854	0.419	0
Mmd	0	0.807961	0.73	0.339	0
Mrpl15	0	0.804395	0.879	0.43	0
Tmem120a	0	0.801878	0.771	0.392	0
Naa10	0	0.796304	0.866	0.347	0
Tufm	0	0.793198	0.825	0.388	0
Tmem147	0	0.792859	0.94	0.56	0
Fkbp3	0	0.791439	0.915	0.515	0
Idh3b	0	0.791179	0.841	0.419	0
Cav1	0	0.79007	0.851	0.55	0
Timm9	0	0.786723	0.785	0.379	0
Atp5l	0	0.783988	0.939	0.771	0
Hnrnpa1	0	0.782414	0.938	0.686	0
Atpaf2	0	0.781979	0.735	0.311	0
Slc25a10	0	0.778345	0.727	0.32	0
Dlat	0	0.775656	0.76	0.384	0
Sdhc	0	0.76879	0.887	0.474	0
Mrpl51	0	0.768462	0.904	0.515	0
Dut	0	0.768414	0.797	0.405	0
Naa50	0	0.765833	0.891	0.483	0
Stmn1	0	0.764049	0.759	0.393	0
Acat1	0	0.763033	0.932	0.6	0
Nudt19	0	0.758655	0.803	0.342	0
Lyar	0	0.752477	0.836	0.371	0
Acadl	0	0.750366	0.797	0.406	0
Ndufb7	0	0.748636	0.887	0.598	0
Samm50	0	0.745675	0.853	0.433	0
Atp1a2	0	0.743822	0.786	0.363	0
Tst	0	0.740021	0.709	0.312	0
Ppp1r14b	0	0.739201	0.951	0.611	0
Uqcrh	0	0.737803	0.92	0.729	0
Mrps16	0	0.737736	0.907	0.557	0
Nolc1	0	0.736051	0.804	0.412	0
Npm3	0	0.732525	0.907	0.551	0
Cct2	0	0.732012	0.919	0.574	0
Adipor2	0	0.731729	0.748	0.345	0
Snu13	0	0.730167	0.942	0.656	0
Chchd3	0	0.730145	0.851	0.461	0
Ptma	0	0.721761	0.963	0.878	0
Cidec	0	0.721086	0.528	0.221	0
Pim3	0	0.720389	0.789	0.384	0
Slc36a2	0	0.716924	0.605	0.161	0
Tmem70	0	0.716264	0.801	0.34	0
Prdx3	0	0.71319	0.877	0.438	0
Chchd4	0	0.712334	0.742	0.337	0
Pdhb	0	0.710955	0.798	0.329	0
Gmnn	0	0.70958	0.608	0.297	0
Nt5dc2	0	0.703206	0.71	0.345	0
Cenpm	0	0.701713	0.706	0.284	0
Prelid3b	0	0.701194	0.795	0.338	0
Cdk4	0	0.70084	0.929	0.645	0
Gapdh	0	0.700514	0.897	0.601	0
Tomm70a	0	0.700232	0.822	0.378	0
Cct7	0	0.694238	0.906	0.53	0
Eif1ad	0	0.694096	0.704	0.309	0
Mrpl55	0	0.69407	0.838	0.398	0
Apex1	0	0.693002	0.806	0.394	0
Cks1b	0	0.691962	0.881	0.554	0
Hadha	0	0.688533	0.802	0.502	0
Snrpd1	0	0.687817	0.894	0.573	0
Nop56	0	0.68744	0.814	0.436	0
2022-03-05	0	0.68617	0.892	0.502	0
Rsl1d1	0	0.683736	0.869	0.462	0
Cdk1	0	0.679851	0.605	0.26	0
Mrps7	0	0.679159	0.852	0.379	0
Smc4	0	0.677465	0.744	0.376	0
Gpi1	0	0.677135	0.896	0.55	0
Cct8	0	0.676731	0.909	0.531	0
Idh3g	0	0.675427	0.832	0.506	0
1700037H04Rik	0	0.674942	0.693	0.321	0
Pmf1	0	0.671059	0.689	0.385	0
U2af1	0	0.668899	0.912	0.575	0
Mki67	0	0.666917	0.584	0.186	0
Nnmt	0	0.663847	0.879	0.61	0
Rrs1	0	0.661669	0.783	0.344	0
Dlst	0	0.658748	0.744	0.36	0
Higd1a	0	0.657729	0.847	0.497	0
Hnrnpab	0	0.656234	0.919	0.591	0
Smc2	0	0.654462	0.651	0.311	0
Ifrd2	0	0.650392	0.717	0.327	0
Rrm1	0	0.649813	0.648	0.29	0
Arl4a	0	0.649149	0.866	0.491	0
Mrps26	0	0.644453	0.864	0.452	0
Pgp	0	0.642304	0.854	0.421	0
Lsm4	0	0.640662	0.923	0.643	0
Lrrc59	0	0.639933	0.864	0.415	0
Gm45716	0	0.6365	0.593	0.256	0
Eef1e1	0	0.635541	0.721	0.338	0
Slc25a19	0	0.634881	0.636	0.331	0
Comtd1	0	0.634011	0.728	0.343	0
Tyms	0	0.632884	0.694	0.303	0
Ghitm	0	0.632741	0.872	0.518	0
Nop10	0	0.632071	0.928	0.639	0
Pop5	0	0.6317	0.796	0.364	0
Idh2	0	0.630549	0.899	0.556	0
Dld	0	0.627256	0.762	0.375	0
Apoo	0	0.62658	0.678	0.259	0
Mrps5	0	0.623313	0.758	0.339	0
Cenpa	0	0.620758	0.632	0.374	0
Gmps	0	0.62057	0.781	0.375	0
Cat	0	0.619258	0.786	0.381	0
Hnrnpa2b1	0	0.619072	0.95	0.786	0
Mrps34	0	0.61778	0.835	0.451	0
Fbl	0	0.615597	0.842	0.451	0
Lgals12	0	0.615251	0.602	0.147	0
Tsfm	0	0.612075	0.723	0.321	0
Pfkl	0	0.611525	0.691	0.296	0
Sdha	0	0.606285	0.884	0.513	0
G3bp1	0	0.605862	0.899	0.573	0
Atp5k	0	0.605011	0.775	0.39	0
Poldip2	0	0.60378	0.858	0.451	0
Mrto4	0	0.602607	0.723	0.395	0
Prps1	0	0.600158	0.658	0.331	0
Cmc2	0	0.597885	0.718	0.311	0
Tkt	0	0.597722	0.894	0.565	0
Ppargc1b	0	0.596827	0.562	0.17	0
Gadd45gip1	0	0.59672	0.875	0.478	0
Rps27l	0	0.594913	0.942	0.728	0
Lsm2	0	0.594005	0.785	0.427	0
H2afx	0	0.593653	0.642	0.322	0
Adrb3	0	0.590815	0.511	0.146	0
Mrpl21	0	0.590511	0.82	0.39	0
Fuom	0	0.589415	0.668	0.24	0
Orc6	0	0.586679	0.738	0.355	0
Rangrf	0	0.586273	0.694	0.36	0
2410015M20Rik	0	0.585669	0.893	0.574	0
Hspa4	0	0.584143	0.822	0.456	0
Dkc1	0	0.583719	0.695	0.336	0
Hdgf	0	0.582753	0.892	0.532	0
Coq7	0	0.581469	0.724	0.352	0
Pfdn6	0	0.581283	0.866	0.513	0
Jagn1	0	0.580291	0.781	0.376	0
Fitm2	0	0.580124	0.621	0.279	0
Mrpl41	0	0.579967	0.795	0.418	0
Vegfb	0	0.579772	0.735	0.378	0
Eif2s1	0	0.579111	0.805	0.361	0
Ndufs8	0	0.575883	0.845	0.522	0
Ppa1	0	0.573093	0.844	0.501	0
Siva1	0	0.572432	0.849	0.454	0
Gnpat	0	0.5722	0.687	0.292	0
Mrps18b	0	0.568626	0.735	0.364	0
BC003965	0	0.568438	0.777	0.371	0
Hibch	0	0.568283	0.637	0.373	0
Gcsh	0	0.567845	0.832	0.421	0
Uhrf1	0	0.565222	0.555	0.179	0
Stip1	0	0.56185	0.713	0.343	0
Mrpl35	0	0.560544	0.821	0.437	0
Ccna2	0	0.558649	0.523	0.101	0
Nucks1	0	0.558393	0.888	0.571	0
Aco1	0	0.557789	0.746	0.366	0
Slc25a11	0	0.556949	0.804	0.46	0
Kmt5a	0	0.556411	0.707	0.372	0
Coq5	0	0.554286	0.666	0.307	0
Mcm7	0	0.554146	0.607	0.266	0
Hmgn5	0	0.553575	0.674	0.296	0
Ddt	0	0.553395	0.83	0.47	0
Cmbl	0	0.552525	0.741	0.395	0
Rfc4	0	0.54971	0.635	0.297	0
Mrps35	0	0.545784	0.719	0.353	0
Coq9	0	0.545077	0.687	0.369	0
Prlr	0	0.542983	0.52	0.189	0
Ppif	0	0.541671	0.612	0.305	0
Lap3	0	0.539636	0.813	0.429	0
Snrpf	0	0.538822	0.894	0.612	0
Dpy30	0	0.538657	0.81	0.43	0
Hist1h1b	0	0.536794	0.381	0.061	0
Phb	0	0.534919	0.778	0.484	0
Mrps6	0	0.533909	0.788	0.451	0
Mrpl38	0	0.532606	0.735	0.419	0
Mrpl2	0	0.532038	0.787	0.38	0
Sephs2	0	0.529369	0.639	0.342	0
Gins2	0	0.528853	0.581	0.26	0
Mrpl47	0	0.52656	0.607	0.302	0
Bzw2	0	0.520593	0.722	0.365	0
Ccnb2	0	0.520269	0.595	0.263	0
Fam136a	0	0.520215	0.718	0.372	0
Wdr12	0	0.519928	0.631	0.307	0
Ube2m	0	0.519358	0.84	0.436	0
Gtpbp4	0	0.519051	0.725	0.351	0
Ptges2	0	0.518297	0.642	0.33	0
Asf1b	0	0.516267	0.526	0.117	0
Pabpc4	0	0.515237	0.73	0.408	0
Gfer	0	0.515157	0.702	0.35	0
Stard7	0	0.512282	0.66	0.28	0
Cenpf	0	0.509051	0.539	0.165	0
Letm1	0	0.508208	0.681	0.31	0
Dnajc9	0	0.508171	0.665	0.316	0
Abhd5	0	0.508059	0.683	0.322	0
Cyb5b	0	0.507509	0.788	0.471	0
Ogdh	0	0.505338	0.751	0.394	0
Wdr18	0	0.500513	0.714	0.383	0
Pbk	0	0.497294	0.489	0.124	0
Slc19a1	0	0.496291	0.574	0.269	0
Spc24	0	0.496092	0.616	0.209	0
Esco2	0	0.493766	0.422	0.086	0
Nudt5	0	0.493086	0.711	0.317	0
Uck1	0	0.491149	0.667	0.344	0
Fxn	0	0.48972	0.61	0.272	0
Ddx39	0	0.489199	0.692	0.353	0
Hmmr	0	0.487899	0.512	0.103	0
Alyref	0	0.48778	0.77	0.371	0
Pycrl	0	0.487736	0.642	0.272	0
Sssca1	0	0.485962	0.711	0.321	0
Timm44	0	0.481172	0.663	0.281	0
Ndufs1	0	0.4804	0.677	0.32	0
Mcm6	0	0.47442	0.562	0.256	0
Afg3l2	0	0.474273	0.642	0.36	0
Ebna1bp2	0	0.472752	0.824	0.473	0
Shmt1	0	0.465369	0.517	0.198	0
Ppid	0	0.465244	0.724	0.384	0
Rcc2	0	0.465127	0.609	0.283	0
Pimreg	0	0.4644	0.549	0.103	0
Bckdhb	0	0.461906	0.645	0.327	0
Ccdc58	0	0.450456	0.653	0.308	0
Ccnb1	0	0.445725	0.518	0.191	0
Psph	0	0.445682	0.635	0.3	0
Ppp2r5a	0	0.445354	0.733	0.394	0
Car2	0	0.444359	0.489	0.198	0
Mtfp1	0	0.444188	0.522	0.244	0
Parp1	0	0.442497	0.642	0.315	0
Rangap1	0	0.442099	0.595	0.277	0
Knstrn	0	0.441166	0.567	0.249	0
Impa2	0	0.44024	0.571	0.254	0
Spc25	0	0.437476	0.512	0.128	0
Odc1	0	0.436527	0.788	0.436	0
Mrpl46	0	0.43012	0.652	0.319	0
Gfm1	0	0.422596	0.587	0.284	0
Tmx2	0	0.41493	0.636	0.316	0
Gemin6	0	0.411945	0.568	0.262	0
Mak16	0	0.401633	0.617	0.291	0
Lpgat1	0	0.391302	0.662	0.338	0
Tfrc	0	0.330381	0.454	0.149	0
Pxmp2	0	0.308429	0.432	0.143	0
Ffar4	0	0.30312	0.397	0.078	0
Rad51ap1	0	0.288998	0.416	0.101	0
Knl1	0	0.283706	0.421	0.086	0
Lrr1	0	0.206635	0.361	0.07	0
Aoc3	9.10528e-308	0.49244	0.783	0.445	1.82106e-304
Ndufs5	1.94524e-306	0.68394	0.89	0.688	3.89048e-303
Hsph1	3.22474e-306	0.39133	0.601	0.314	6.44948e-303
Nop58	9.32642e-306	0.480241	0.843	0.525	1.86528e-302
Pde3b	4.23583e-303	0.496036	0.509	0.201	8.47167e-300
Dbt	5.36845e-303	0.455848	0.598	0.31	1.07369e-299
Ndufa9	6.91557e-302	0.534658	0.769	0.423	1.38311e-298
Hcar1	2.38645e-301	0.359922	0.449	0.145	4.7729e-298
Atp5g3	1.05776e-300	0.554844	0.896	0.62	2.11553e-297
Lig1	1.3015e-300	0.455775	0.552	0.279	2.60299e-297
Mpc1	4.60681e-300	0.831589	0.846	0.595	9.21363e-297
Impdh2	7.30764e-299	0.500677	0.865	0.531	1.46153e-295
Ndufb3	1.65673e-297	0.557307	0.862	0.529	3.31345e-294
Sgo2a	3.00763e-297	0.213418	0.376	0.069	6.01526e-294
Rnaseh2c	8.71376e-296	0.466387	0.823	0.524	1.74275e-292
Emc9	9.65182e-296	0.414221	0.69	0.384	1.93036e-292
Pex16	6.00781e-295	0.400209	0.625	0.335	1.20156e-291
Ppil1	1.87556e-293	0.444609	0.619	0.318	3.75112e-290
Ephx2	4.41123e-293	0.507712	0.628	0.316	8.82246e-290
Gar1	6.50197e-293	0.451624	0.746	0.436	1.30039e-289
Srsf1	6.90619e-293	0.422827	0.752	0.438	1.38124e-289
Hnrnpf	2.48188e-292	0.531257	0.903	0.669	4.96377e-289
Ndufv1	5.29501e-292	0.528318	0.818	0.477	1.059e-288
Nop16	1.40882e-290	0.474968	0.639	0.355	2.81764e-287
Cavin2	1.47797e-290	0.541467	0.745	0.422	2.95593e-287
Snrpa1	2.77375e-290	0.414036	0.75	0.433	5.54751e-287
Cebpb	8.12561e-290	0.664373	0.915	0.739	1.62512e-286
Kcnk3	3.88042e-288	0.422158	0.419	0.142	7.76083e-285
2010107E04Rik	7.02295e-288	0.646459	0.87	0.69	1.40459e-284
Ndufs6	4.13759e-286	0.562607	0.865	0.563	8.27518e-283
Ezh2	1.29706e-285	0.466003	0.564	0.275	2.59412e-282
Dgat1	3.81282e-285	0.640972	0.613	0.333	7.62563e-282
Lsm5	5.72201e-285	0.410098	0.727	0.36	1.1444e-281
Etfdh	3.41545e-283	0.458757	0.623	0.31	6.83091e-280
Tmem238	3.56091e-283	0.385431	0.622	0.339	7.12182e-280
Ndufc1	1.85338e-281	0.583886	0.867	0.557	3.70675e-278
Dgat2	7.45935e-281	0.615567	0.516	0.254	1.49187e-277
Cenpw	1.70289e-280	0.47518	0.536	0.255	3.40578e-277
Ube2c	1.73072e-280	0.703347	0.585	0.289	3.46145e-277
Tpx2	3.30143e-278	0.460076	0.504	0.178	6.60286e-275
Etfa	7.94636e-278	0.736236	0.856	0.546	1.58927e-274
Crip2	1.09052e-277	0.510148	0.916	0.72	2.18104e-274
Ccne1	2.98372e-276	0.35442	0.472	0.188	5.96744e-273
Psma1	6.13412e-276	0.518028	0.863	0.559	1.22682e-272
Ddx21	8.37664e-275	0.43277	0.634	0.346	1.67533e-271
Pank3	3.04242e-274	0.475414	0.611	0.321	6.08485e-271
Akap1	3.21213e-274	0.426196	0.534	0.276	6.42427e-271
Snrpe	4.98248e-274	0.49123	0.894	0.633	9.96496e-271
Snrpd3	9.93831e-273	0.46418	0.823	0.468	1.98766e-269
Usp1	1.91638e-270	0.419738	0.663	0.356	3.83276e-267
Hp	4.587e-270	1.04815	0.549	0.292	9.17401e-267
Anp32e	3.38954e-269	0.39445	0.732	0.431	6.77909e-266
Ruvbl2	1.88815e-268	0.469177	0.63	0.362	3.7763e-265
Ncapg	2.03879e-268	0.240541	0.354	0.085	4.07758e-265
Itpk1	3.99889e-268	0.50497	0.594	0.34	7.99779e-265
Gnl3	1.13993e-267	0.46202	0.77	0.482	2.27987e-264
Ciapin1	2.94584e-267	0.411484	0.617	0.345	5.89168e-264
Rabggtb	4.19575e-267	0.374176	0.69	0.392	8.39151e-264
Mcm5	3.07077e-266	0.476092	0.543	0.29	6.14155e-263
Crls1	2.05332e-265	0.377883	0.583	0.264	4.10665e-262
Ndufaf6	7.91487e-265	0.404047	0.591	0.357	1.58297e-261
Ppp2r1b	8.44031e-265	0.321607	0.472	0.222	1.68806e-261
Taf1d	1.18278e-264	0.374445	0.663	0.346	2.36556e-261
Cpt2	1.94283e-261	0.429925	0.592	0.29	3.88567e-258
Ddx39b	2.92393e-261	0.421754	0.813	0.482	5.84786e-258
Psmb5	3.90757e-261	0.506924	0.891	0.671	7.81515e-258
Kif11	5.70924e-261	0.250758	0.378	0.111	1.14185e-257
Usmg5	1.36559e-260	0.556533	0.829	0.552	2.73118e-257
Ndufb4	2.80641e-260	0.530408	0.878	0.598	5.61283e-257
Bub1b	9.65962e-259	0.203255	0.392	0.106	1.93192e-255
Minos1	1.35366e-258	0.608547	0.875	0.7	2.70732e-255
Pcx	1.62295e-257	0.554171	0.539	0.249	3.24591e-254
Dnaja3	7.50935e-255	0.458713	0.617	0.355	1.50187e-251
Vars	2.98084e-254	0.443723	0.633	0.391	5.96167e-251
Psat1	2.99451e-254	0.424186	0.607	0.348	5.98902e-251
Atp5j2	1.81208e-251	0.686613	0.871	0.696	3.62416e-248
Sucla2	4.19825e-251	0.507266	0.721	0.408	8.39651e-248
Ssrp1	9.67225e-251	0.424427	0.799	0.495	1.93445e-247
Cdc20	2.1198e-250	0.59053	0.532	0.269	4.23961e-247
Id1	6.08684e-249	0.576017	0.679	0.471	1.21737e-245
Slc1a3	1.28011e-248	0.405597	0.681	0.392	2.56022e-245
Hmgn2	4.81854e-248	0.344921	0.725	0.435	9.63708e-245
Cox7a1	4.84274e-248	0.702762	0.533	0.265	9.68549e-245
Mthfd2	1.78343e-247	0.431664	0.596	0.353	3.56686e-244
Mpp6	8.31796e-246	0.345011	0.607	0.318	1.66359e-242
Retn	1.21263e-244	0.710458	0.469	0.203	2.42526e-241
Ppargc1a	1.8349e-244	0.359265	0.416	0.15	3.6698e-241
Cd1d1	3.55463e-242	0.3692	0.437	0.18	7.10927e-239
Ndufa5	9.52263e-242	0.548067	0.829	0.546	1.90453e-238
Wdr43	9.18451e-240	0.364081	0.572	0.311	1.8369e-236
Lsm3	1.33076e-239	0.392846	0.736	0.414	2.66151e-236
Mrps22	1.62537e-239	0.476168	0.561	0.304	3.25074e-236
Hadhb	1.26408e-237	0.619015	0.719	0.42	2.52816e-234
Cdkn2c	4.46569e-236	0.39791	0.559	0.29	8.93138e-233
Tmem97	5.09378e-235	0.347513	0.678	0.408	1.01876e-231
Tspan12	8.63178e-234	0.391145	0.57	0.352	1.72636e-230
Haus8	4.2274e-233	0.313169	0.49	0.249	8.4548e-230
Nasp	7.06292e-233	0.442983	0.698	0.452	1.41258e-229
C330027C09Rik	8.27381e-233	0.207013	0.386	0.142	1.65476e-229
Fam213a	2.85865e-230	0.544413	0.562	0.348	5.7173e-227
Ndrg2	1.11397e-227	0.372813	0.684	0.407	2.22795e-224
Chpt1	1.1339e-226	0.361812	0.756	0.494	2.26779e-223
Atic	7.37818e-226	0.393032	0.64	0.394	1.47564e-222
Dot1l	1.07978e-225	0.349589	0.525	0.292	2.15955e-222
Grb14	2.65898e-225	0.450145	0.603	0.36	5.31797e-222
Baz1a	2.86418e-225	0.338522	0.585	0.328	5.72836e-222
Cdca8	3.67419e-225	0.540761	0.536	0.279	7.34838e-222
Haus4	1.38404e-223	0.348651	0.486	0.238	2.76807e-220
Ifi27	2.45342e-223	0.737478	0.881	0.746	4.90684e-220
S100a1	1.41501e-221	0.484852	0.854	0.644	2.83002e-218
Noc2l	1.68076e-221	0.421552	0.561	0.324	3.36151e-218
Tipin	4.63501e-221	0.313628	0.667	0.371	9.27002e-218
Anapc15	6.00388e-221	0.314963	0.565	0.342	1.20078e-217
Wfdc21	7.64438e-221	0.24706	0.304	0.04	1.52888e-217
Gpatch4	2.42199e-220	0.434325	0.597	0.37	4.84399e-217
Pdhx	1.2704e-219	0.383391	0.481	0.241	2.5408e-216
Car13	3.65253e-218	0.326202	0.552	0.289	7.30507e-215
Acadvl	1.51449e-216	0.552584	0.714	0.415	3.02898e-213
Aplp2	4.6399e-216	0.413935	0.884	0.716	9.2798e-213
Snhg6	4.03743e-215	0.327385	0.658	0.34	8.07486e-212
Hist1h4i	8.30134e-215	0.411305	0.488	0.251	1.66027e-211
Gys1	8.831e-215	0.325262	0.456	0.218	1.7662e-211
Aifm2	1.24958e-214	0.448931	0.519	0.289	2.49916e-211
2310061I04Rik	3.39962e-214	0.377554	0.561	0.36	6.79924e-211
Pold2	5.39748e-214	0.354094	0.573	0.318	1.0795e-210
Cenpe	9.47268e-214	0.338881	0.441	0.187	1.89454e-210
Hat1	3.8223e-213	0.415896	0.592	0.374	7.64459e-210
Ccne2	7.05507e-213	0.217514	0.342	0.08	1.41101e-209
Smoc1	2.19475e-212	0.487224	0.496	0.259	4.3895e-209
Srsf7	2.83887e-212	0.439203	0.829	0.624	5.67774e-209
Slfn9	4.86488e-212	0.460947	0.559	0.33	9.72975e-209
Kif22	1.6333e-211	0.254312	0.382	0.105	3.2666e-208
Cox6c	2.62191e-211	0.503415	0.912	0.757	5.24382e-208
1110008P14Rik	2.78564e-211	0.457534	0.672	0.397	5.57129e-208
Tmpo	7.18096e-211	0.368413	0.697	0.456	1.43619e-207
Incenp	1.01695e-210	0.313548	0.439	0.202	2.03391e-207
A530016L24Rik	7.14919e-210	0.406821	0.451	0.207	1.42984e-206
Prc1	3.74384e-209	0.409498	0.44	0.165	7.48769e-206
Dnph1	1.72485e-207	0.329615	0.424	0.148	3.4497e-204
Mcm3	2.79669e-203	0.411756	0.528	0.319	5.59337e-200
Tank	7.62184e-203	0.35874	0.592	0.372	1.52437e-199
Fmc1	2.80262e-201	0.368259	0.679	0.359	5.60524e-198
4931406C07Rik	4.23605e-200	0.388274	0.57	0.356	8.47211e-197
Rfc2	1.97236e-198	0.354782	0.611	0.369	3.94472e-195
Mad2l1	1.09272e-196	0.356511	0.444	0.211	2.18545e-193
Bcat2	2.48078e-196	0.387148	0.617	0.398	4.96157e-193
Cdc45	3.81906e-196	0.206	0.37	0.139	7.63812e-193
Dek	4.90493e-196	0.446851	0.769	0.478	9.80986e-193
Plk1	1.01465e-195	0.298066	0.427	0.179	2.02931e-192
Lmnb1	3.01492e-195	0.33477	0.521	0.304	6.02983e-192
Rpa1	2.20535e-194	0.293017	0.492	0.267	4.41069e-191
Cenps	1.77344e-193	0.223793	0.403	0.163	3.54687e-190
Pex11a	3.29056e-193	0.325921	0.457	0.216	6.58112e-190
Tspan18	9.90634e-192	0.286251	0.459	0.268	1.98127e-188
Chaf1a	1.0001e-191	0.255086	0.434	0.238	2.00021e-188
Mgll	1.27829e-191	0.220137	0.64	0.393	2.55657e-188
Ndufa6	1.77645e-190	0.487748	0.852	0.613	3.5529e-187
Grwd1	1.01767e-187	0.331041	0.472	0.261	2.03534e-184
Fam69b	1.51144e-184	0.374385	0.565	0.355	3.02289e-181
Uchl5	1.6081e-183	0.362331	0.587	0.376	3.2162e-180
Atad2	4.29605e-183	0.359896	0.518	0.312	8.5921e-180
Fcor	2.79535e-182	0.436634	0.41	0.143	5.5907e-179
Cav2	7.92092e-182	0.291816	0.528	0.342	1.58418e-178
Hells	8.261e-182	0.454964	0.497	0.296	1.6522e-178
Gm47283	1.10009e-180	0.327539	0.646	0.413	2.20018e-177
Ptcd3	3.7973e-179	0.405947	0.541	0.353	7.59461e-176
Srsf3	6.7267e-179	0.388936	0.877	0.727	1.34534e-175
Gale	2.25797e-178	0.376338	0.468	0.26	4.51594e-175
Ncapd3	1.93979e-177	0.243071	0.402	0.202	3.87958e-174
Aurkb	3.18881e-177	0.336418	0.398	0.145	6.37761e-174
Cenpu	1.00736e-176	0.225325	0.385	0.162	2.01472e-173
Esrra	1.39941e-176	0.352759	0.509	0.3	2.79883e-173
Nup43	4.97818e-176	0.269154	0.435	0.238	9.95636e-173
Cdkn3	7.79381e-175	0.26582	0.462	0.246	1.55876e-171
Mis18bp1	1.70664e-171	0.214834	0.322	0.079	3.41327e-168
Dtl	2.39467e-168	0.218364	0.368	0.158	4.78934e-165
Acaa2	3.62375e-168	0.589884	0.77	0.499	7.2475e-165
Adam12	2.11485e-166	0.301665	0.645	0.411	4.2297e-163
Fam13a	3.37205e-166	0.450586	0.474	0.282	6.74411e-163
Topbp1	3.26661e-164	0.334934	0.512	0.333	6.53322e-161
Lpin1	5.23053e-164	0.264985	0.471	0.274	1.04611e-160
Sae1	1.10735e-163	0.216951	0.667	0.416	2.21469e-160
Dhfr	4.41527e-162	0.3422	0.504	0.324	8.83054e-159
Rfc5	2.343e-156	0.360845	0.499	0.312	4.686e-153
Kif20b	7.71917e-155	0.20968	0.361	0.145	1.54383e-151
Ung	3.3092e-154	0.448527	0.458	0.27	6.6184e-151
Nxt1	3.37516e-153	0.256006	0.524	0.307	6.75032e-150
Hipk2	2.91068e-152	0.310555	0.445	0.285	5.82137e-149
Dbf4	2.73621e-151	0.232803	0.415	0.243	5.47242e-148
Nrm	3.21091e-151	0.256883	0.464	0.303	6.42181e-148
Ndufb2	3.38651e-151	0.268396	0.753	0.478	6.77302e-148
Anln	1.05279e-150	0.271893	0.419	0.204	2.10558e-147
Gnai1	2.18258e-150	0.317078	0.464	0.276	4.36515e-147
Cdt1	2.82098e-148	0.290433	0.425	0.239	5.64196e-145
Syce2	5.81891e-147	0.299142	0.475	0.311	1.16378e-143
Asns	2.80742e-144	0.273807	0.484	0.305	5.61484e-141
Cib2	4.19209e-144	0.429782	0.465	0.313	8.38418e-141
Adhfe1	1.33042e-143	0.34696	0.457	0.278	2.66085e-140
Prim1	1.52793e-143	0.331009	0.484	0.328	3.05587e-140
Cenpp	9.48344e-143	0.228721	0.386	0.169	1.89669e-139
Fignl1	1.82296e-142	0.203914	0.341	0.121	3.64592e-139
Thrsp	8.18655e-142	1.04546	0.481	0.337	1.63731e-138
mt-Atp6	2.39248e-140	1.5355	0.56	0.417	4.78495e-137
Tmem37	8.36395e-140	0.366066	0.503	0.304	1.67279e-136
Srsf2	1.45255e-139	0.340883	0.86	0.745	2.9051e-136
Pdss1	2.88619e-139	0.312469	0.436	0.246	5.77237e-136
C130074G19Rik	5.31844e-137	0.266286	0.383	0.186	1.06369e-133
Mthfd1	5.4462e-137	0.305969	0.456	0.302	1.08924e-133
Cfd	5.58721e-137	1.21752	0.382	0.238	1.11744e-133
Dctd	1.17124e-136	0.383729	0.45	0.242	2.34248e-133
Aurka	1.47887e-136	0.294473	0.412	0.21	2.95774e-133
Clstn3	3.83369e-135	0.261414	0.348	0.147	7.66738e-132
Rpa2	5.02827e-135	0.346381	0.477	0.299	1.00565e-131
N4bp2l1	6.53726e-135	0.27137	0.464	0.302	1.30745e-131
Tuba1b	2.3861e-134	0.480132	0.814	0.706	4.7722e-131
Mcm4	6.13297e-133	0.266314	0.442	0.289	1.22659e-129
Tubb4b	7.23239e-133	0.403286	0.775	0.612	1.44648e-129
Dnmt1	1.07818e-132	0.269692	0.458	0.306	2.15635e-129
Noct	3.62601e-132	0.2607	0.457	0.278	7.25202e-129
Nsd2	3.38109e-131	0.233538	0.463	0.307	6.76218e-128
Mcm2	1.20015e-129	0.347689	0.425	0.264	2.40029e-126
Chaf1b	1.37585e-128	0.21133	0.355	0.164	2.7517e-125
Acox1	2.25267e-127	0.321983	0.536	0.366	4.50534e-124
Cdca7	2.42649e-127	0.330466	0.409	0.23	4.85299e-124
Ckap2l	9.25e-125	0.258726	0.403	0.2	1.85e-121
Aqp7	1.06341e-124	0.313127	0.396	0.222	2.12683e-121
Tacc3	7.14245e-124	0.234888	0.41	0.231	1.42849e-120
3110043O21Rik	1.93016e-122	0.277284	0.398	0.251	3.86032e-119
Racgap1	1.89447e-119	0.292034	0.415	0.195	3.78895e-116
Fam213b	3.85947e-118	0.234256	0.496	0.321	7.71894e-115
Lpl	3.76161e-117	0.246076	0.961	0.823	7.52322e-114
Hmgb1	4.87621e-117	0.245529	0.873	0.71	9.75242e-114
Psmc3ip	1.38702e-116	0.315887	0.432	0.274	2.77404e-113
Pdk4	1.66814e-115	0.252432	0.371	0.239	3.33627e-112
Pcna	3.70863e-115	0.240534	0.478	0.334	7.41726e-112
Rasd1	6.58241e-115	0.287063	0.399	0.253	1.31648e-111
Cenpk	1.72608e-111	0.252403	0.395	0.237	3.45216e-108
Slc16a1	4.05354e-111	0.312223	0.483	0.368	8.10709e-108
mt-Cytb	4.03526e-110	1.02831	0.517	0.412	8.07052e-107
Pck1	8.83456e-110	0.549742	0.388	0.257	1.76691e-106
Hist1h1e	3.23358e-109	0.561123	0.532	0.439	6.46717e-106
Sub1	2.67342e-108	0.278347	0.838	0.728	5.34684e-105
Slc5a3	2.63951e-104	0.339549	0.552	0.442	5.27901e-101
Tob1	1.12683e-103	0.220254	0.663	0.525	2.25367e-100
Fen1	2.68328e-103	0.254996	0.379	0.243	5.36655e-100
Lockd	4.24573e-103	0.265672	0.389	0.211	8.49147e-100
Sik2	4.26824e-103	0.320788	0.424	0.282	8.53649e-100
Cox8b	7.71721e-103	0.219776	0.334	0.219	1.54344e-99
Uck2	2.47737e-102	0.294033	0.427	0.273	4.95475e-99
Me1	4.01351e-99	0.220014	0.474	0.348	8.02701e-96
2022-09-06	9.90708e-94	0.285051	0.509	0.392	1.98142e-90
Coq8a	2.02636e-93	0.358722	0.363	0.239	4.05272e-90
Ccnd2	2.05019e-93	0.245546	0.799	0.623	4.10039e-90
Ndc1	3.60522e-92	0.283336	0.44	0.322	7.21043e-89
Plin4	7.70294e-92	0.219085	0.38	0.236	1.54059e-88
Ankef1	7.99248e-91	0.297071	0.377	0.186	1.5985e-87
Rad51	1.09437e-89	0.211495	0.302	0.15	2.18874e-86
mt-Nd4	1.91855e-88	0.726344	0.55	0.502	3.83709e-85
Ube2t	2.41638e-88	0.205415	0.29	0.099	4.83276e-85
Clspn	1.94988e-87	0.246439	0.362	0.204	3.89976e-84
Tubb5	2.80465e-87	0.533966	0.732	0.645	5.6093e-84
Tenm4	7.37478e-86	0.228922	0.339	0.152	1.47496e-82
Sorbs1	8.20769e-81	0.213613	0.369	0.275	1.64154e-77
Rfc3	4.87692e-79	0.218935	0.386	0.291	9.75384e-76
Arl6ip1	1.98261e-78	0.237322	0.844	0.667	3.96523e-75
Tcf19	5.73954e-72	0.297328	0.411	0.309	1.14791e-68
Cenpq	1.70192e-70	0.239985	0.422	0.307	3.40385e-67
Hirip3	9.51604e-60	0.232991	0.399	0.313	1.90321e-56
Aspm	3.39893e-56	0.252819	0.338	0.191	6.79785e-53
Car5b	1.52494e-51	0.240949	0.391	0.343	3.04987e-48
mt-Nd5	2.65871e-46	0.243866	0.601	0.581	5.31742e-43
Apoc1	4.33039e-40	0.283586	0.361	0.287	8.66078e-37
Mxd3	4.26589e-37	0.200159	0.325	0.186	8.53178e-34
Ncapg2	6.56976e-37	0.226926	0.369	0.286	1.31395e-33
Plin5	1.58765e-34	0.231346	0.305	0.189	3.17529e-31
mt-Co3	2.38594e-32	1.096	0.454	0.398	4.77187e-29
mt-Co2	2.82686e-32	1.29215	0.41	0.354	5.65373e-29
Lypd1	9.41809e-32	0.294939	0.479	0.427	1.88362e-28
Gk	4.17114e-31	0.300941	0.354	0.303	8.34229e-28
Fndc5	5.88065e-28	0.246719	0.364	0.303	1.17613e-24
mt-Nd2	5.62515e-23	0.548347	0.342	0.287	1.12503e-19
Sncg	6.41701e-17	0.202284	0.314	0.306	1.2834e-13
Elovl3	2.69958e-10	0.246038	0.275	0.25	5.39916e-07
mt-Co1	1.09303e-09	0.764196	0.528	0.56	2.18606e-06
mt-Nd1	1.49822e-06	1.06826	0.379	0.415	0.00299643
Ucp1	9.18087e-05	1.82606	0.26	0.291	0.183617
Cidea	0.00894232	0.580247	0.301	0.378	1
Gmpr	0.0790633	0.51786	0.228	0.248	1
Fabp3	0.0968474	0.467142	0.291	0.359	1
Cdo1	0.418209	0.232594	0.271	0.334	1
