# Supplementary material for: Deconstructing cold-induced brown adipocyte neogenesis in mice
Source: eLife. 2022 Jul 18;11:e80167. doi: 10.7554/eLife.80167 (PMC9348851; doi:10.7554/eLife.80167)
Supplement: Supplementary file 3. [file elife-80167-supp3.xlsx]

## Sheet: INFORMATION
Supplementary File 3. DEGs for each cluster in the WT and Adrb1 KO Lin- iBAT data.
Related to Figure 5A-B.
List of DEGs define by Seurat by graph-based clustering. Each cluster is a new tab.
iBAT, Lin- cells, WT and Adrb1 KO, CONTROL and COLD libraries.
Differentially expressed genes that define each cluster were identified using a Wilcoxon Rank Sum test in Seurat with the following parameters: min.pct = 0.20, logfc.threshold = 0.2, only.pos = TRUE.

## Sheet: ASC1
	p_val	avg_logFC	pct.1	pct.2	p_val_adj
Lpl	0	2.08233	0.943	0.359	0
Col4a1	0	1.66749	0.946	0.38	0
Cxcl14	0	1.5963	0.621	0.104	0
Col15a1	0	1.49366	0.914	0.262	0
Col6a3	0	1.41721	0.935	0.43	0
Timp1	0	1.36207	0.427	0.155	0
Cxcl9	0	1.35563	0.513	0.082	0
Col4a2	0	1.3299	0.916	0.359	0
Smoc2	0	1.26646	0.693	0.225	0
Plin2	0	1.19543	0.768	0.257	0
Col6a1	0	1.12359	0.952	0.526	0
Tmem176b	0	1.11378	0.726	0.255	0
Sparcl1	0	1.09799	0.909	0.466	0
Apoe	0	1.05452	0.668	0.316	0
Serpinh1	0	1.02176	0.955	0.614	0
Cd63	0	1.0155	0.939	0.624	0
Enpp2	0	1.00925	0.745	0.166	0
Col5a3	0	1.00789	0.854	0.325	0
Col6a2	0	0.993503	0.931	0.47	0
Meox1	0	0.962465	0.584	0.085	0
Tmem176a	0	0.947039	0.642	0.226	0
Hspg2	0	0.934827	0.852	0.421	0
Bmper	0	0.933809	0.637	0.091	0
Dpep1	0	0.925881	0.848	0.473	0
Lum	0	0.922851	0.887	0.478	0
Mafb	0	0.914141	0.595	0.161	0
Lgals1	0	0.910251	0.897	0.602	0
Ccl11	0	0.906738	0.878	0.502	0
Pcolce	0	0.905468	0.89	0.46	0
Rarres2	0	0.841005	0.898	0.618	0
Vcam1	0	0.838367	0.658	0.156	0
Thbs1	0	0.826733	0.516	0.135	0
Cyp1b1	0	0.812463	0.708	0.187	0
Fst	0	0.803749	0.656	0.313	0
Serf2	0	0.803646	0.925	0.724	0
Cp	0	0.794428	0.757	0.261	0
Serpine1	0	0.786835	0.538	0.174	0
B2m	0	0.755102	0.912	0.72	0
Fbln7	0	0.751233	0.549	0.129	0
Ctsh	0	0.746257	0.811	0.415	0
Tnc	0	0.742683	0.298	0.066	0
Cstb	0	0.730636	0.713	0.405	0
Tmsb10	0	0.727843	0.912	0.663	0
G0s2	0	0.714948	0.523	0.197	0
Angptl4	0	0.709295	0.627	0.333	0
Cpxm1	0	0.705468	0.682	0.25	0
Srpx	0	0.693636	0.728	0.304	0
Ctsc	0	0.689766	0.484	0.097	0
Lypd1	0	0.682337	0.337	0.046	0
Lamb1	0	0.680794	0.786	0.329	0
Aldoa	0	0.679936	0.83	0.535	0
Nid2	0	0.677813	0.516	0.1	0
Ftl1	0	0.651857	0.951	0.762	0
Sec61g	0	0.64751	0.752	0.472	0
Fgf10	0	0.64479	0.441	0.075	0
Npc2	0	0.63785	0.85	0.566	0
Rcn3	0	0.637631	0.843	0.497	0
Mme	0	0.637067	0.502	0.085	0
Plod1	0	0.635937	0.651	0.2	0
Lgals3bp	0	0.630926	0.693	0.336	0
Col5a2	0	0.630638	0.885	0.498	0
Snhg18	0	0.630462	0.71	0.294	0
Fscn1	0	0.629103	0.624	0.162	0
Anxa5	0	0.623413	0.881	0.608	0
Fkbp11	0	0.621286	0.57	0.201	0
Adam23	0	0.619028	0.53	0.096	0
Mgst1	0	0.614952	0.896	0.576	0
Hmox1	0	0.611426	0.447	0.115	0
Ssr2	0	0.608998	0.731	0.421	0
Rrbp1	0	0.606717	0.923	0.676	0
Gpx7	0	0.605121	0.69	0.327	0
Cldn15	0	0.593964	0.437	0.067	0
Kdelr3	0	0.592948	0.713	0.292	0
Rhoj	0	0.592004	0.833	0.454	0
Plxdc2	0	0.58568	0.785	0.415	0
Sparc	0	0.578921	0.953	0.687	0
Spry1	0	0.565309	0.527	0.143	0
Abca8a	0	0.559055	0.728	0.355	0
Angptl2	0	0.554693	0.748	0.332	0
Vkorc1	0	0.554638	0.733	0.427	0
Emilin1	0	0.550313	0.552	0.166	0
Fkbp10	0	0.542627	0.618	0.238	0
H2-Q10	0	0.534173	0.326	0.042	0
Lgmn	0	0.526654	0.579	0.238	0
Tmem167	0	0.523086	0.748	0.41	0
Mmp14	0	0.522329	0.825	0.454	0
Mdk	0	0.514679	0.446	0.107	0
Col5a1	0	0.513261	0.843	0.459	0
Adam12	0	0.512557	0.388	0.062	0
Ms4a4d	0	0.511681	0.683	0.264	0
Slfn5	0	0.511326	0.846	0.495	0
Col3a1	0	0.507235	0.933	0.556	0
Serpinf1	0	0.505245	0.911	0.578	0
Tmem119	0	0.493657	0.531	0.166	0
Adamts12	0	0.493604	0.517	0.173	0
Svep1	0	0.492496	0.574	0.181	0
Steap4	0	0.480096	0.648	0.236	0
Eva1b	0	0.474645	0.714	0.335	0
Col18a1	0	0.473748	0.565	0.193	0
Lifr	0	0.4731	0.513	0.185	0
Ifitm2	0	0.469164	0.924	0.718	0
Slc1a3	0	0.463756	0.359	0.063	0
Mxra8	0	0.454324	0.758	0.386	0
Trabd2b	0	0.452479	0.362	0.064	0
Ifi207	0	0.432032	0.681	0.3	0
Bgn	0	0.431927	0.864	0.414	0
Angptl1	0	0.430698	0.498	0.177	0
Sned1	0	0.422987	0.456	0.161	0
Nr1h3	0	0.420913	0.458	0.105	0
Colec12	0	0.420416	0.466	0.159	0
Mrc2	0	0.419662	0.613	0.231	0
AW112010	0	0.413289	0.608	0.27	0
P3h1	0	0.411154	0.5	0.163	0
Gpm6b	0	0.410648	0.668	0.242	0
Enpep	0	0.409878	0.461	0.115	0
Sdc1	0	0.409059	0.377	0.092	0
Gpr153	0	0.407299	0.435	0.125	0
Traf4	0	0.404261	0.367	0.075	0
Pofut2	0	0.397135	0.633	0.264	0
Cxcl16	0	0.396298	0.494	0.154	0
C1qtnf6	0	0.393962	0.575	0.214	0
Il1r1	0	0.3937	0.556	0.222	0
Pappa	0	0.392595	0.202	0.026	0
Clmp	0	0.392155	0.588	0.233	0
Mmp19	0	0.381203	0.432	0.131	0
Frmd4a	0	0.380006	0.426	0.126	0
Serf1	0	0.374586	0.534	0.194	0
Adamts4	0	0.374033	0.301	0.065	0
Ggt5	0	0.373325	0.354	0.095	0
Retsat	0	0.363464	0.314	0.068	0
Snai1	0	0.360036	0.342	0.081	0
2022-09-11	0	0.355108	0.672	0.292	0
Col27a1	0	0.352381	0.34	0.075	0
Itm2a	0	0.351959	0.629	0.254	0
Olfm2	0	0.348506	0.202	0.016	0
Prkar2b	0	0.345214	0.333	0.071	0
Pdgfrb	0	0.341753	0.629	0.24	0
Aoc3	0	0.331361	0.495	0.152	0
Ptgir	0	0.316994	0.267	0.049	0
Adcyap1r1	0	0.307204	0.293	0.061	0
Tusc5	0	0.303625	0.258	0.04	0
C1qtnf12	0	0.301707	0.453	0.155	0
Bcat1	0	0.299354	0.295	0.06	0
Pparg	0	0.298531	0.42	0.116	0
Ndufa4l2	0	0.290172	0.568	0.195	0
Rgs10	0	0.261772	0.485	0.157	0
Spaar	0	0.254559	0.259	0.048	0
Ppib	1.25546e-306	0.497275	0.913	0.694	2.34444e-302
Arpc1b	5.03804e-304	0.482207	0.881	0.647	9.40803e-300
Fap	6.78366e-304	0.403614	0.48	0.176	1.26678e-299
Ccl2	1.84945e-303	1.50711	0.323	0.095	3.45367e-299
Oaf	3.63275e-303	0.491329	0.781	0.435	6.78381e-299
Ccnd2	3.71581e-303	0.432008	0.687	0.338	6.93891e-299
Ryk	4.98946e-303	0.374422	0.672	0.312	9.31732e-299
Plpp1	1.11713e-302	0.279483	0.579	0.24	2.08613e-298
Gsto1	2.09658e-300	0.254645	0.354	0.102	3.91515e-296
P3h4	2.16162e-299	0.343308	0.535	0.215	4.0366e-295
Mif	3.26994e-299	0.661472	0.646	0.345	6.10629e-295
Ppic	5.76771e-299	0.43369	0.793	0.453	1.07706e-294
Srm	1.26604e-296	0.466581	0.579	0.265	2.3642e-292
Jade1	9.97121e-295	0.364857	0.44	0.155	1.86202e-290
Idh1	4.53964e-293	0.352888	0.583	0.249	8.47733e-289
Sh3bgrl3	1.09675e-292	0.402535	0.763	0.465	2.04807e-288
Creb3l1	4.17813e-288	0.349374	0.522	0.206	7.80225e-284
Ada	3.68864e-286	0.217222	0.216	0.04	6.88816e-282
Ifi204	2.23766e-285	0.396235	0.734	0.371	4.17861e-281
Loxl2	8.70215e-285	0.347747	0.692	0.325	1.62504e-280
Gpx3	3.43872e-284	0.278954	0.809	0.447	6.42147e-280
Creg1	6.41207e-284	0.415992	0.699	0.359	1.19739e-279
Ccdc80	2.80665e-282	0.38171	0.812	0.45	5.24113e-278
Erp29	6.32167e-282	0.459718	0.746	0.44	1.18051e-277
P2ry14	7.12983e-282	0.279735	0.219	0.042	1.33142e-277
P4ha1	7.7138e-282	0.356854	0.664	0.311	1.44047e-277
Adam19	5.67967e-279	0.314371	0.351	0.107	1.06062e-274
Pdgfra	8.07642e-278	0.438759	0.757	0.39	1.50819e-273
Rnf144a	1.29407e-275	0.240962	0.298	0.079	2.41654e-271
Arhgap24	5.51684e-275	0.313558	0.324	0.092	1.03022e-270
Crtap	2.40354e-274	0.360087	0.627	0.293	4.48837e-270
Ifi27	7.73135e-274	0.522383	0.759	0.475	1.44375e-269
Ap3s1	1.76012e-272	0.395954	0.665	0.34	3.28685e-268
Tceal9	1.83464e-272	0.462262	0.773	0.476	3.42601e-268
Cxcl1	1.66361e-271	0.730536	0.584	0.296	3.10663e-267
Cyth3	1.87422e-271	0.371805	0.567	0.246	3.49991e-267
Ifi211	1.59434e-269	0.278744	0.399	0.135	2.97726e-265
Scarb2	2.14695e-269	0.328834	0.597	0.271	4.00922e-265
Mt1	2.52945e-269	1.00293	0.643	0.375	4.72349e-265
Il17d	2.64235e-269	0.337287	0.285	0.076	4.93432e-265
Col1a2	5.97384e-269	0.303236	0.93	0.597	1.11555e-264
Tmed3	5.76312e-268	0.440181	0.837	0.556	1.0762e-263
Layn	6.68943e-268	0.245802	0.283	0.074	1.24918e-263
Ost4	1.45288e-267	0.581068	0.745	0.497	2.7131e-263
Ccdc71l	3.561e-266	0.25944	0.356	0.112	6.6498e-262
Nnmt	3.28398e-265	0.339576	0.56	0.245	6.13251e-261
H2-Q7	2.10479e-264	0.206169	0.487	0.19	3.93048e-260
Swi5	2.98611e-264	0.459743	0.826	0.58	5.57627e-260
Tfpi	3.13676e-264	0.250188	0.466	0.176	5.85759e-260
Egfr	6.68476e-264	0.339501	0.569	0.242	1.24831e-259
Lrrc59	2.80847e-263	0.367177	0.54	0.24	5.24455e-259
Sec22b	4.1017e-263	0.348294	0.623	0.297	7.65952e-259
Acot7	8.87953e-263	0.200814	0.349	0.109	1.65816e-258
Lama2	2.18993e-261	0.534718	0.667	0.331	4.08947e-257
Cd302	3.13084e-259	0.37319	0.806	0.473	5.84653e-255
Nrep	1.31615e-257	0.428695	0.331	0.105	2.45778e-253
P4hb	1.66011e-257	0.473427	0.781	0.495	3.10009e-253
Ckap4	4.47549e-257	0.431045	0.684	0.367	8.35753e-253
Calr	1.34097e-256	0.512816	0.861	0.631	2.50412e-252
2310039H08Rik	7.6293e-256	0.286525	0.505	0.21	1.4247e-251
Tmed9	4.13794e-255	0.435726	0.827	0.575	7.72719e-251
Rplp0	1.31113e-254	0.524437	0.935	0.799	2.44841e-250
Cnpy2	2.50307e-253	0.407727	0.791	0.507	4.67424e-249
Cd81	6.63925e-253	0.373323	0.915	0.723	1.23981e-248
P2rx4	6.35265e-252	0.307762	0.489	0.2	1.18629e-247
Lman1	2.08555e-251	0.411867	0.724	0.409	3.89455e-247
Pth1r	2.75222e-251	0.2103	0.308	0.09	5.13949e-247
Car13	3.80681e-251	0.205255	0.229	0.052	7.10884e-247
Pycr1	1.82613e-250	0.226032	0.246	0.06	3.41011e-246
Ldha	2.27209e-250	0.562141	0.722	0.455	4.24291e-246
Casp4	1.13025e-249	0.272605	0.419	0.153	2.11062e-245
Csad	8.83853e-249	0.264987	0.371	0.127	1.65051e-244
Por	1.14409e-248	0.310158	0.572	0.258	2.13648e-244
Chpf	4.5827e-248	0.299054	0.5	0.207	8.55774e-244
Pgm2	1.44333e-247	0.237656	0.337	0.107	2.69527e-243
2022-09-09	3.19835e-247	0.20325	0.365	0.121	5.97259e-243
Mmp2	1.5477e-246	0.484169	0.813	0.502	2.89017e-242
Krtcap2	3.56623e-246	0.430892	0.839	0.603	6.65957e-242
Itpripl2	1.81886e-245	0.289386	0.501	0.207	3.39654e-241
Mydgf	2.0253e-245	0.377452	0.691	0.392	3.78205e-241
Itih5	2.84519e-245	0.552353	0.8	0.458	5.3131e-241
Praf2	4.55941e-243	0.263177	0.492	0.202	8.51423e-239
Surf4	7.02596e-243	0.350852	0.673	0.354	1.31203e-238
Fam49a	9.17815e-242	0.257994	0.251	0.064	1.71393e-237
Tril	5.2808e-241	0.278036	0.333	0.108	9.86136e-237
Mfap2	2.27586e-240	0.388742	0.586	0.278	4.24994e-236
Fdxr	2.96065e-240	0.234845	0.235	0.058	5.52871e-236
Scn1b	3.60675e-240	0.288029	0.545	0.24	6.73524e-236
Tmed2	7.03236e-239	0.418441	0.828	0.588	1.31322e-234
P4ha2	2.10684e-238	0.268198	0.474	0.19	3.93432e-234
Thsd7a	3.03627e-238	0.284769	0.267	0.073	5.66993e-234
Eif4ebp1	5.19458e-238	0.396223	0.63	0.333	9.70036e-234
Cyb5a	8.68533e-238	0.403888	0.891	0.658	1.6219e-233
Apex1	1.90999e-237	0.232593	0.358	0.123	3.56672e-233
Kdelr2	4.53941e-237	0.525453	0.644	0.356	8.47689e-233
Loxl1	1.09076e-236	0.403746	0.802	0.486	2.03689e-232
Ptges	1.13017e-236	0.269212	0.385	0.137	2.11048e-232
P3h3	2.22983e-236	0.260461	0.611	0.281	4.16398e-232
Fam43a	5.20669e-236	0.210487	0.31	0.096	9.72298e-232
Egr2	1.1973e-235	0.279496	0.304	0.094	2.23584e-231
Sec61b	5.07441e-235	0.566176	0.756	0.517	9.47595e-231
Col1a1	5.8178e-235	0.236855	0.896	0.544	1.08642e-230
Svbp	1.54503e-234	0.339388	0.65	0.342	2.88519e-230
Ssr4	2.52604e-234	0.450133	0.787	0.528	4.71713e-230
Eps8	4.36034e-234	0.26735	0.426	0.165	8.14249e-230
Il11ra1	1.41593e-233	0.268897	0.773	0.435	2.64411e-229
Maged1	1.67116e-233	0.381154	0.7	0.396	3.12073e-229
Eif4g3	2.23559e-233	0.363428	0.572	0.266	4.17474e-229
Fam46a	2.51951e-233	0.396686	0.685	0.362	4.70493e-229
H2-K1	2.71022e-233	0.432234	0.846	0.604	5.06107e-229
Arl1	1.53439e-232	0.383946	0.784	0.503	2.86533e-228
Fkbp7	4.60603e-232	0.359316	0.724	0.411	8.6013e-228
Smad3	4.89009e-232	0.243601	0.262	0.072	9.13176e-228
1110065P20Rik	3.48651e-230	0.235861	0.469	0.193	6.51071e-226
Tfpi2	1.99827e-227	0.223337	0.294	0.089	3.73157e-223
Rpl22l1	2.30232e-227	0.494785	0.875	0.697	4.29935e-223
Tmem106a	7.05392e-227	0.228439	0.359	0.125	1.31725e-222
Sult5a1	2.94036e-226	0.370562	0.49	0.213	5.49084e-222
Sh3pxd2a	1.5444e-225	0.254038	0.357	0.126	2.88401e-221
Scarf2	4.58345e-225	0.235222	0.358	0.125	8.55914e-221
B3gnt9	8.85919e-225	0.247441	0.382	0.139	1.65436e-220
Srpx2	1.59346e-224	0.237861	0.371	0.132	2.97562e-220
Yipf5	1.77225e-222	0.262856	0.587	0.279	3.30951e-218
Sfxn1	1.90037e-222	0.300967	0.674	0.353	3.54875e-218
Ifitm3	5.71574e-222	0.459331	0.889	0.707	1.06736e-217
Cxcl10	7.45877e-222	1.05103	0.251	0.073	1.39285e-217
Cdc42ep5	1.84011e-221	0.222209	0.455	0.185	3.43622e-217
Igf1	2.40868e-221	0.371399	0.543	0.251	4.49797e-217
Rem1	5.33074e-221	0.208965	0.223	0.055	9.95462e-217
H13	7.06996e-221	0.318167	0.652	0.347	1.32024e-216
Tnfaip2	2.35786e-220	0.257752	0.345	0.121	4.40307e-216
Scd1	2.43335e-220	0.351849	0.496	0.221	4.54404e-216
Colgalt1	2.99883e-220	0.296721	0.641	0.325	5.60001e-216
Ntf3	1.25388e-219	0.333923	0.269	0.08	2.3415e-215
Cald1	1.59072e-219	0.38118	0.879	0.637	2.9705e-215
Arf4	3.27423e-219	0.390638	0.852	0.616	6.11429e-215
Cks1b	5.15414e-219	0.223459	0.548	0.246	9.62485e-215
S100a1	1.43473e-218	0.360776	0.601	0.317	2.67922e-214
H2-D1	4.61619e-218	0.475961	0.887	0.721	8.62028e-214
Csgalnact1	6.27067e-218	0.217948	0.202	0.046	1.17099e-213
Prrx2	6.85493e-218	0.23892	0.349	0.123	1.28009e-213
Ctsk	8.91022e-218	0.26733	0.661	0.33	1.66389e-213
Spcs1	5.79352e-217	0.387687	0.758	0.512	1.08188e-212
Txndc5	7.9454e-217	0.349374	0.762	0.458	1.48372e-212
Cmbl	8.43503e-217	0.261702	0.263	0.078	1.57516e-212
2022-03-05	9.62929e-217	0.283997	0.558	0.266	1.79817e-212
Nmb	1.19909e-216	0.396851	0.241	0.066	2.23919e-212
Il3ra	3.53423e-216	0.233375	0.442	0.179	6.59983e-212
Hacd1	5.58341e-216	0.247582	0.417	0.164	1.04265e-211
Tceal8	6.97262e-216	0.345168	0.656	0.363	1.30207e-211
Maged2	7.98529e-215	0.317637	0.614	0.308	1.49117e-210
Yif1a	8.06887e-215	0.246767	0.586	0.285	1.50678e-210
2022-09-08	1.31443e-214	0.241445	0.592	0.28	2.45457e-210
Cdh11	1.35505e-214	0.23227	0.268	0.079	2.53041e-210
Glt8d1	1.65605e-214	0.216225	0.413	0.161	3.0925e-210
2610524H06Rik	3.65338e-214	0.207375	0.302	0.097	6.82233e-210
Cndp2	8.16625e-214	0.255023	0.502	0.222	1.52497e-209
Ank2	9.06611e-214	0.255671	0.358	0.129	1.69301e-209
Tmem97	1.68068e-213	0.208473	0.308	0.102	3.1385e-209
Nudcd2	1.90987e-211	0.208787	0.504	0.222	3.56649e-207
Spred1	2.63257e-211	0.278144	0.491	0.217	4.91606e-207
Fads1	5.91585e-211	0.25454	0.334	0.117	1.10473e-206
Rab13	2.26409e-209	0.232601	0.456	0.193	4.22796e-205
Rcn1	5.71609e-209	0.32398	0.739	0.435	1.06742e-204
Tmem263	9.46524e-209	0.223799	0.43	0.173	1.76754e-204
Adh1	8.54812e-208	0.278968	0.304	0.101	1.59628e-203
Arfgap1	2.82424e-207	0.217174	0.36	0.132	5.27399e-203
Prorsd1	3.90953e-206	0.20185	0.396	0.154	7.30066e-202
Tmed1	2.93042e-205	0.218402	0.535	0.245	5.47226e-201
2810004N23Rik	1.01453e-204	0.203435	0.365	0.136	1.89453e-200
Iigp1	3.0275e-204	0.549348	0.482	0.234	5.65355e-200
Fam162a	1.68626e-202	0.258915	0.638	0.342	3.14892e-198
Sar1a	6.96631e-200	0.32627	0.762	0.481	1.30089e-195
Rbp4	7.86905e-200	0.243022	0.375	0.147	1.46947e-195
Dnajc25	1.51599e-199	0.220716	0.513	0.232	2.83097e-195
Rpl41	2.63449e-198	0.602965	0.865	0.727	4.91965e-194
Sec24d	1.28042e-197	0.200511	0.477	0.208	2.39105e-193
1110008F13Rik	4.91068e-197	0.296207	0.649	0.361	9.1702e-193
Tspan31	1.51104e-196	0.207914	0.557	0.266	2.82172e-192
Nid1	5.46515e-196	0.290559	0.907	0.606	1.02056e-191
Dclk1	8.57212e-196	0.269788	0.563	0.272	1.60076e-191
Fam198b	1.88907e-195	0.218747	0.433	0.181	3.52764e-191
Dtx4	4.39091e-195	0.2136	0.261	0.08	8.19958e-191
Snhg6	8.38266e-195	0.232877	0.415	0.173	1.56538e-190
Serp1	1.82973e-194	0.321676	0.639	0.367	3.41684e-190
Atf5	1.87404e-194	0.353892	0.666	0.364	3.49958e-190
Ass1	2.35652e-194	0.357377	0.277	0.092	4.40056e-190
Akr1b3	4.71367e-194	0.3484	0.643	0.363	8.80231e-190
Sec13	8.87129e-194	0.266701	0.585	0.302	1.65663e-189
Cmpk1	9.76606e-194	0.214401	0.591	0.296	1.82371e-189
Rab34	7.35457e-193	0.21422	0.533	0.249	1.37339e-188
Atp9a	3.27609e-192	0.212536	0.398	0.163	6.11778e-188
Poldip2	1.16707e-191	0.201389	0.418	0.174	2.17939e-187
Mageh1	1.27668e-191	0.216465	0.448	0.192	2.38408e-187
Idh2	2.07193e-191	0.217467	0.536	0.256	3.86912e-187
Naa50	2.46713e-191	0.236675	0.571	0.282	4.60712e-187
Mt2	3.13828e-191	0.887954	0.481	0.257	5.86043e-187
Gstt1	1.23929e-190	0.341345	0.604	0.319	2.31425e-186
Peg3	7.75688e-190	0.29588	0.371	0.148	1.44852e-185
Sra1	2.71869e-189	0.258932	0.67	0.384	5.07688e-185
Ifngr2	8.9019e-189	0.210959	0.474	0.211	1.66234e-184
Ctsb	1.1125e-187	0.356222	0.873	0.649	2.07749e-183
Pdia6	2.04433e-187	0.423604	0.775	0.537	3.81758e-183
Ift20	6.94795e-186	0.321577	0.703	0.435	1.29746e-181
Osmr	7.40521e-186	0.238246	0.44	0.193	1.38285e-181
Mxra7	1.25093e-185	0.233169	0.692	0.373	2.336e-181
Htra3	6.81658e-184	0.464218	0.8	0.522	1.27293e-179
Ccl7	9.03267e-184	1.11631	0.361	0.166	1.68676e-179
Grn	1.72584e-183	0.357226	0.748	0.478	3.22283e-179
H2-M3	1.74183e-183	0.204481	0.378	0.152	3.25268e-179
Fzd1	3.44868e-183	0.203866	0.37	0.146	6.44007e-179
Snrk	7.03391e-183	0.254211	0.518	0.245	1.31351e-178
Oasl2	5.08869e-181	0.247094	0.403	0.173	9.50261e-177
Gm12216	1.02229e-180	0.311189	0.454	0.21	1.90902e-176
Rexo2	1.29185e-180	0.350103	0.728	0.482	2.4124e-176
Scand1	4.61879e-180	0.26677	0.707	0.411	8.62513e-176
Cebpa	2.70153e-179	0.208659	0.27	0.092	5.04485e-175
Mrpl17	3.15601e-179	0.252302	0.58	0.309	5.89353e-175
Eif1ax	3.16266e-178	0.231641	0.569	0.289	5.90595e-174
Pcdh7	4.90106e-178	0.22369	0.388	0.159	9.15223e-174
Nav1	6.84229e-177	0.33184	0.72	0.41	1.27773e-172
Aprt	3.26928e-176	0.28007	0.636	0.361	6.10505e-172
Pdia4	3.80435e-176	0.263548	0.599	0.315	7.10424e-172
Ppdpf	4.74898e-176	0.221326	0.574	0.296	8.86824e-172
Copz2	5.11743e-176	0.250329	0.668	0.382	9.55628e-172
B4galt5	2.52735e-175	0.217596	0.251	0.082	4.71958e-171
Arf5	2.87815e-175	0.327815	0.851	0.636	5.37466e-171
Dlc1	4.82899e-175	0.217034	0.641	0.334	9.01766e-171
Rps2	5.27846e-175	0.492039	0.862	0.713	9.857e-171
Ssr1	8.37927e-175	0.232069	0.62	0.332	1.56475e-170
Gm4951	2.20831e-174	0.256372	0.273	0.096	4.12379e-170
H2-T22	6.61087e-174	0.32383	0.623	0.35	1.23451e-169
Cox14	1.17227e-172	0.284624	0.657	0.385	2.18909e-168
Ostc	1.75511e-172	0.36393	0.751	0.517	3.27749e-168
Igsf10	5.24155e-172	0.227158	0.446	0.198	9.78808e-168
Nme1	1.54075e-171	0.393885	0.596	0.36	2.87719e-167
Lamtor1	4.26136e-171	0.207871	0.617	0.327	7.95766e-167
Acvr2a	4.90943e-171	0.252276	0.317	0.121	9.16787e-167
Cthrc1	4.95177e-171	0.326484	0.289	0.108	9.24693e-167
Hexa	1.22817e-170	0.284509	0.716	0.429	2.29348e-166
Ikbip	7.51178e-170	0.206039	0.602	0.308	1.40275e-165
Iah1	1.46102e-169	0.214048	0.623	0.331	2.72832e-165
Rpl31	6.94947e-169	0.434266	0.807	0.635	1.29774e-164
Sc5d	6.96689e-169	0.248441	0.273	0.098	1.301e-164
Gpx8	2.92932e-168	0.221585	0.723	0.449	5.47022e-164
Ifi205	7.29923e-168	0.204602	0.503	0.239	1.36306e-163
Mlec	1.10256e-167	0.208731	0.587	0.303	2.05893e-163
Cdc26	1.3524e-167	0.222124	0.603	0.322	2.52547e-163
Slc39a7	9.42741e-166	0.216953	0.617	0.327	1.76047e-161
Tpm4	2.18018e-164	0.367476	0.754	0.529	4.07128e-160
Ctsz	8.98652e-164	0.284053	0.821	0.568	1.67814e-159
Eif1a	9.23757e-164	0.208531	0.536	0.27	1.72502e-159
Morf4l2	1.75587e-162	0.297288	0.725	0.48	3.27891e-158
Tnfrsf1a	2.79796e-162	0.240195	0.667	0.385	5.22491e-158
Atp5g1	1.80239e-161	0.345773	0.752	0.527	3.36578e-157
Rnase4	3.60074e-161	0.313495	0.881	0.603	6.72402e-157
Prrc1	5.84774e-161	0.202288	0.396	0.172	1.09201e-156
Isg15	9.61896e-161	0.619963	0.465	0.247	1.79625e-156
Gpx4	8.47848e-160	0.333629	0.851	0.663	1.58327e-155
Txn2	4.13084e-159	0.251419	0.601	0.34	7.71393e-155
Map4k4	5.45682e-159	0.242671	0.624	0.338	1.01901e-154
Cmtm3	6.38671e-159	0.202033	0.589	0.31	1.19265e-154
Ddit3	1.04581e-157	0.23726	0.401	0.179	1.95295e-153
Tcf7l2	1.19187e-157	0.234091	0.447	0.212	2.22569e-153
Selenos	3.09765e-157	0.220454	0.694	0.41	5.78456e-153
Pdap1	5.22497e-157	0.249991	0.652	0.377	9.7571e-153
Gng5	8.02143e-155	0.323899	0.857	0.677	1.49792e-150
Selenow	1.18935e-154	0.291722	0.918	0.753	2.22099e-150
Rpl29	1.5457e-154	0.378601	0.832	0.658	2.88643e-150
Meg3	8.21846e-154	0.34936	0.735	0.505	1.53472e-149
Efemp2	2.79278e-153	0.259133	0.653	0.392	5.21523e-149
H2afj	7.71291e-153	0.243646	0.591	0.333	1.44031e-148
Hspe1	4.00235e-152	0.421234	0.675	0.458	7.47398e-148
Fkbp9	5.76929e-150	0.250392	0.78	0.504	1.07736e-145
Cacna2d1	1.67873e-149	0.203665	0.375	0.165	3.13486e-145
Eif5a	4.96129e-149	0.449857	0.763	0.576	9.26472e-145
Copb2	9.32678e-149	0.204417	0.642	0.359	1.74168e-144
Rpl39	1.60227e-148	0.380408	0.886	0.743	2.99208e-144
Rtp4	1.88065e-148	0.216652	0.441	0.216	3.51193e-144
Hic1	5.426e-148	0.203528	0.401	0.183	1.01325e-143
Ssh2	7.86387e-148	0.203142	0.408	0.188	1.4685e-143
Ier3ip1	4.14302e-145	0.212652	0.61	0.355	7.73668e-141
Tmem258	5.87616e-144	0.304269	0.612	0.39	1.09731e-139
Mndal	6.56997e-144	0.226758	0.568	0.308	1.22688e-139
Ifi203	1.16427e-143	0.287873	0.576	0.323	2.17415e-139
Psmb2	1.62618e-142	0.299244	0.709	0.477	3.03672e-138
Glrx3	1.80643e-142	0.214849	0.65	0.383	3.37333e-138
Uqcrq	3.0102e-142	0.360165	0.64	0.423	5.62124e-138
Psma4	4.88238e-141	0.271154	0.709	0.473	9.11737e-137
Selenom	9.52971e-141	0.24069	0.845	0.611	1.77958e-136
Sec11a	3.57901e-140	0.235705	0.717	0.468	6.68344e-136
Rps18	5.32421e-140	0.368646	0.904	0.766	9.94242e-136
Rab2a	1.65379e-139	0.259201	0.839	0.617	3.08829e-135
Hdlbp	2.89894e-139	0.252014	0.757	0.48	5.41349e-135
Rhoc	1.96217e-137	0.296708	0.736	0.509	3.66416e-133
Mrpl52	2.91927e-135	0.263082	0.656	0.422	5.45145e-131
Prdx1	1.56617e-134	0.328072	0.824	0.644	2.92467e-130
Kdelr1	1.0404e-133	0.223784	0.723	0.469	1.94284e-129
Hspa5	1.37839e-132	0.40318	0.831	0.648	2.57401e-128
Lamc1	1.44924e-131	0.239434	0.758	0.469	2.70631e-127
Phlda1	1.70639e-130	0.423697	0.598	0.385	3.18651e-126
Xbp1	1.7374e-130	0.202977	0.667	0.412	3.24443e-126
Rps17	2.375e-129	0.344322	0.883	0.755	4.43507e-125
Eif6	3.26576e-128	0.209051	0.579	0.338	6.09848e-124
Ndufa4	4.49574e-128	0.317398	0.788	0.598	8.39535e-124
Ranbp1	1.3998e-127	0.252977	0.651	0.43	2.61398e-123
Manf	1.46232e-127	0.395577	0.624	0.423	2.73074e-123
Cdk4	6.79841e-127	0.225777	0.604	0.36	1.26954e-122
Rpl23a	1.01163e-126	0.324835	0.916	0.797	1.88911e-122
Chchd2	2.33942e-126	0.326227	0.843	0.696	4.36863e-122
Prelid1	1.11405e-124	0.266478	0.649	0.425	2.08038e-120
Rpl13a	3.87875e-124	0.343679	0.708	0.521	7.24318e-120
Psap	1.20322e-123	0.337341	0.895	0.746	2.2469e-119
Selenof	1.78453e-123	0.24772	0.879	0.702	3.33244e-119
Fcgrt	1.8525e-123	0.245631	0.83	0.584	3.45935e-119
Rpl32	4.03931e-121	0.321526	0.94	0.831	7.54301e-117
Eef1g	1.39402e-120	0.349682	0.82	0.665	2.60318e-116
Rtraf	2.48655e-120	0.24174	0.747	0.529	4.64339e-116
Lrp1	3.77317e-119	0.209455	0.812	0.523	7.04602e-115
Pebp1	8.49857e-115	0.23803	0.787	0.583	1.58702e-110
2010107E04Rik	3.47668e-113	0.2384	0.605	0.393	6.49235e-109
Rpl15	3.72477e-113	0.306945	0.901	0.783	6.95564e-109
Ecm2	7.98873e-113	0.226329	0.449	0.239	1.49182e-108
Dnajb1	2.98162e-112	0.393289	0.479	0.299	5.56788e-108
Tuba1a	1.1791e-111	0.264464	0.838	0.66	2.20185e-107
Pgk1	1.67758e-111	0.205743	0.533	0.311	3.13271e-107
Rpl10a	2.13125e-108	0.307334	0.892	0.749	3.9799e-104
Htra1	4.75792e-108	0.283432	0.784	0.542	8.88493e-104
Abca9	6.6539e-108	0.242637	0.268	0.12	1.24255e-103
Dad1	2.98544e-107	0.23126	0.792	0.602	5.57502e-103
Hsp90b1	3.64312e-107	0.297379	0.887	0.722	6.80316e-103
Sod2	6.66823e-106	0.434519	0.497	0.312	1.24522e-101
Capg	2.71903e-105	0.202058	0.676	0.443	5.07751e-101
Edf1	4.31493e-104	0.261824	0.753	0.557	8.05771e-100
Cfl1	1.00186e-103	0.263699	0.836	0.68	1.87087e-99
Atp5e	1.21764e-102	0.252949	0.774	0.592	2.27382e-98
Elob	3.3149e-102	0.239534	0.815	0.639	6.19025e-98
Rps28	1.41184e-101	0.246949	0.846	0.697	2.63647e-97
Rpl24	1.6545e-101	0.268107	0.924	0.811	3.08961e-97
Capns1	9.23404e-101	0.21637	0.825	0.637	1.72436e-96
Dcn	1.14617e-100	0.280756	0.897	0.656	2.14035e-96
Gapdh	7.04799e-100	0.235926	0.57	0.372	1.31614e-95
Rps15a	3.11067e-99	0.269125	0.933	0.83	5.80886e-95
Gabarap	1.7669e-98	0.260669	0.875	0.727	3.29951e-94
Irf7	7.02603e-98	0.270063	0.358	0.191	1.31204e-93
Rplp1	2.05473e-96	0.292617	0.886	0.753	3.83699e-92
Rpl6	3.53379e-96	0.248318	0.923	0.807	6.59901e-92
Rps27l	6.54381e-96	0.258403	0.726	0.535	1.22199e-91
Nupr1	1.39873e-94	0.260882	0.634	0.435	2.612e-90
Cox8a	1.77143e-94	0.20494	0.842	0.657	3.30798e-90
Itm2b	2.25037e-94	0.273693	0.926	0.881	4.20234e-90
Rpl37	1.91665e-93	0.24166	0.893	0.77	3.57915e-89
Psma3	5.10568e-93	0.210024	0.754	0.573	9.53434e-89
Rpl34	9.75646e-92	0.230406	0.926	0.818	1.82192e-87
Sem1	9.18047e-90	0.205317	0.812	0.645	1.71436e-85
Cebpb	1.11405e-89	0.29445	0.615	0.43	2.08038e-85
Etfb	1.98632e-89	0.223191	0.628	0.438	3.70926e-85
Cdc42	9.80516e-89	0.201745	0.842	0.67	1.83102e-84
S100a6	1.02112e-88	0.254266	0.881	0.745	1.90685e-84
Bst2	2.77025e-88	0.43041	0.61	0.442	5.17316e-84
Mrfap1	1.18395e-87	0.20467	0.799	0.614	2.21091e-83
Rpl35	1.21781e-86	0.223099	0.691	0.512	2.27413e-82
Rpl11	8.63509e-84	0.221321	0.893	0.767	1.61252e-79
Pdia3	3.58218e-82	0.21207	0.858	0.695	6.68937e-78
Hsd11b1	1.21056e-81	0.274435	0.353	0.197	2.2606e-77
Rpl36	1.5625e-80	0.209424	0.887	0.74	2.91781e-76
Rps6	6.40062e-80	0.235847	0.933	0.843	1.19525e-75
Npm1	1.7488e-77	0.272464	0.803	0.666	3.26571e-73
Ifit3	3.54967e-77	0.473507	0.265	0.139	6.62865e-73
Slc25a5	6.62393e-76	0.310089	0.577	0.424	1.23695e-71
Rps26	5.71289e-75	0.23405	0.86	0.724	1.06682e-70
Rplp2	2.04278e-71	0.213687	0.839	0.723	3.81469e-67
Klf9	8.37617e-65	0.217916	0.783	0.593	1.56417e-60
Ifit1	1.62025e-53	0.268521	0.269	0.156	3.02566e-49
Gsn	2.5312e-45	0.357024	0.721	0.647	4.72675e-41
Slc39a1	3.3996e-25	0.295819	0.252	0.181	6.34841e-21
Gm26917	1.14809e-23	0.332973	0.367	0.251	2.14394e-19
Txnip	0.000815766	0.230322	0.641	0.62	1

## Sheet: ASC2
	p_val	avg_logFC	pct.1	pct.2	p_val_adj
Fn1	0	2.50231	0.945	0.303	0
Pi16	0	2.50118	0.875	0.174	0
Smpd3	0	1.99347	0.623	0.052	0
Sema3c	0	1.9674	0.833	0.136	0
Anxa3	0	1.83298	0.894	0.284	0
Sbsn	0	1.80947	0.526	0.107	0
Cd55	0	1.78195	0.78	0.174	0
Plpp3	0	1.76409	0.963	0.606	0
Daglb	0	1.70631	0.525	0.092	0
Igfbp5	0	1.70292	0.802	0.318	0
Pla1a	0	1.69983	0.77	0.196	0
Fbn1	0	1.65113	0.903	0.473	0
Creb5	0	1.6272	0.772	0.182	0
Ackr3	0	1.60473	0.802	0.209	0
Dpp4	0	1.58978	0.707	0.088	0
Pcsk6	0	1.53771	0.733	0.155	0
Fndc1	0	1.52405	0.832	0.243	0
Ugdh	0	1.51656	0.782	0.315	0
C3	0	1.50662	0.904	0.399	0
Cd248	0	1.49563	0.846	0.312	0
Mrgprg	0	1.46997	0.313	0.011	0
Dmkn	0	1.42806	0.228	0.025	0
Col6a5	0	1.41791	0.244	0.019	0
Igfbp6	0	1.38752	0.966	0.406	0
Efemp1	0	1.38403	0.802	0.276	0
Marcks	0	1.34636	0.934	0.624	0
Gfpt2	0	1.34615	0.679	0.227	0
Ifi27l2a	0	1.34232	0.781	0.311	0
Col14a1	0	1.33095	0.902	0.326	0
Pcolce2	0	1.32049	0.896	0.313	0
Tgfbr2	0	1.30661	0.826	0.425	0
Emilin2	0	1.29942	0.715	0.224	0
Adamts5	0	1.28433	0.857	0.416	0
Gas7	0	1.28385	0.611	0.167	0
Ptx3	0	1.28053	0.431	0.117	0
Car8	0	1.2784	0.532	0.05	0
Gan	0	1.27501	0.406	0.091	0
Timp2	0	1.27486	0.971	0.642	0
Dpt	0	1.26888	0.97	0.545	0
Procr	0	1.26102	0.626	0.2	0
Cd34	0	1.23628	0.938	0.49	0
Mfap5	0	1.20382	0.938	0.469	0
Axl	0	1.19587	0.831	0.443	0
Fstl1	0	1.18049	0.951	0.634	0
Clec3b	0	1.17602	0.982	0.501	0
Opcml	0	1.17487	0.521	0.068	0
Anxa1	0	1.16901	0.915	0.523	0
Tnfaip6	0	1.1594	0.623	0.292	0
Aif1l	0	1.15738	0.469	0.052	0
Aldh1a3	0	1.15693	0.423	0.037	0
Efhd1	0	1.14061	0.506	0.058	0
Lrrn4cl	0	1.13492	0.587	0.144	0
Basp1	0	1.1289	0.682	0.297	0
Metrnl	0	1.11911	0.669	0.311	0
Akr1c18	0	1.11547	0.285	0.011	0
Adgrd1	0	1.09784	0.526	0.102	0
Tmem100	0	1.06167	0.625	0.188	0
Scara5	0	1.0222	0.737	0.298	0
Man1a	0	1.00288	0.733	0.347	0
Ly6c1	0	0.994332	0.831	0.34	0
Ppp1r14b	0	0.985269	0.758	0.43	0
Nov	0	0.973674	0.323	0.037	0
Nid1	0	0.967491	0.92	0.588	0
Scara3	0	0.961975	0.602	0.231	0
Sfrp2	0	0.958294	0.48	0.103	0
Islr	0	0.946399	0.731	0.353	0
Ly6a	0	0.946278	0.958	0.572	0
Ddr2	0	0.892439	0.74	0.445	0
Ogn	0	0.89141	0.866	0.455	0
Prrx1	0	0.88964	0.782	0.468	0
Cadm3	0	0.884344	0.471	0.113	0
Flrt2	0	0.87107	0.468	0.151	0
1700019D03Rik	0	0.859679	0.381	0.052	0
Ebf2	0	0.856701	0.614	0.355	0
Maf	0	0.849165	0.459	0.124	0
Nova1	0	0.848371	0.393	0.096	0
Trio	0	0.848063	0.476	0.181	0
Pde8a	0	0.847898	0.444	0.125	0
Serpinb6a	0	0.842487	0.889	0.606	0
Cmah	0	0.839426	0.344	0.052	0
Jpt1	0	0.833288	0.751	0.471	0
Plat	0	0.830059	0.614	0.305	0
Fgfr1	0	0.828255	0.724	0.457	0
Ptgis	0	0.826922	0.424	0.099	0
Antxr1	0	0.82691	0.619	0.294	0
Qpct	0	0.8264	0.535	0.219	0
Tnxb	0	0.819285	0.79	0.45	0
Prss23	0	0.809461	0.731	0.442	0
Il33	0	0.806965	0.399	0.145	0
Zfp385a	0	0.804195	0.4	0.126	0
Arl4d	0	0.789108	0.36	0.063	0
Pamr1	0	0.788867	0.394	0.094	0
Ltbp1	0	0.786478	0.472	0.177	0
Ext1	0	0.78364	0.457	0.216	0
Vasn	0	0.778977	0.478	0.226	0
Nhsl1	0	0.773126	0.328	0.059	0
Fyn	0	0.772665	0.555	0.265	0
Islr2	0	0.757671	0.277	0.019	0
Tppp3	0	0.745954	0.717	0.368	0
Dbn1	0	0.743743	0.497	0.234	0
Dact2	0	0.740017	0.233	0.023	0
Itga11	0	0.738415	0.335	0.067	0
Ace	0	0.737371	0.523	0.213	0
Rbpj	0	0.736637	0.498	0.243	0
Galnt16	0	0.733681	0.346	0.066	0
Heg1	0	0.724814	0.669	0.395	0
Lsp1	0	0.721251	0.624	0.295	0
Myof	0	0.710322	0.388	0.135	0
Wnt2	0	0.708851	0.275	0.038	0
Lurap1l	0	0.707022	0.336	0.076	0
Zyx	0	0.705297	0.572	0.312	0
Bmp1	0	0.702671	0.627	0.397	0
Il13ra1	0	0.700448	0.337	0.108	0
S100a16	0	0.695455	0.79	0.57	0
Ebf1	0	0.692008	0.858	0.627	0
S100a10	0	0.690523	0.904	0.679	0
Gpc6	0	0.678357	0.372	0.137	0
Sirpa	0	0.666794	0.366	0.136	0
S100a13	0	0.665613	0.801	0.621	0
Medag	0	0.659914	0.643	0.391	0
Duoxa1	0	0.654821	0.233	0.012	0
Gda	0	0.654615	0.366	0.109	0
Clip4	0	0.653947	0.308	0.074	0
Uchl1	0	0.649032	0.259	0.042	0
Limch1	0	0.639081	0.354	0.082	0
Ildr2	0	0.6319	0.278	0.061	0
Ddah2	0	0.621163	0.703	0.483	0
Ecm1	0	0.614021	0.723	0.427	0
Sytl2	0	0.602942	0.248	0.033	0
Arhgef28	0	0.590644	0.266	0.061	0
Ston2	0	0.588564	0.237	0.038	0
Fez1	0	0.577361	0.316	0.088	0
Duox1	0	0.570447	0.202	0.008	0
Ahnak	0	0.565975	0.904	0.723	0
Nbl1	0	0.56528	0.713	0.382	0
Osr2	0	0.547068	0.222	0.038	0
Adamtsl4	0	0.536771	0.233	0.049	0
Zbtb20	0	0.530262	0.911	0.765	0
Klf4	0	0.499135	0.858	0.576	0
Rps4x	0	0.4677	0.956	0.812	0
Mustn1	0	0.45022	0.383	0.121	0
Rps3a1	0	0.408265	0.964	0.834	0
Plau	6.39675e-308	0.657033	0.268	0.069	1.19453e-303
Ablim1	1.13988e-307	0.571758	0.656	0.378	2.12862e-303
S100a6	2.65224e-306	0.531793	0.948	0.716	4.9528e-302
Cd47	1.14879e-301	0.519346	0.865	0.702	2.14526e-297
Il6ra	2.40744e-299	0.607496	0.299	0.091	4.49565e-295
Htra3	1.28453e-298	0.466173	0.806	0.507	2.39873e-294
Fhl1	3.30943e-298	0.639806	0.566	0.312	6.18004e-294
Slc4a4	1.64012e-297	0.697017	0.383	0.153	3.06277e-293
S100a11	6.3614e-297	0.592496	0.884	0.697	1.18793e-292
Il18	3.1861e-295	0.564552	0.23	0.053	5.94973e-291
Glce	8.64461e-295	0.61837	0.282	0.082	1.61429e-290
Fgf2	8.58265e-286	0.54269	0.242	0.059	1.60272e-281
Rpl30	6.00941e-284	0.433866	0.94	0.806	1.1222e-279
Rnase4	2.6806e-282	0.480177	0.87	0.594	5.00576e-278
Ahnak2	7.11705e-282	0.633023	0.581	0.33	1.32904e-277
Tek	2.27242e-281	0.588399	0.363	0.136	4.24351e-277
Rps24	8.20393e-279	0.374648	0.968	0.831	1.532e-274
Sulf1	3.36716e-278	0.656569	0.422	0.195	6.28783e-274
Rpl5	1.5596e-273	0.468631	0.899	0.75	2.9124e-269
Rps15	8.72881e-272	0.485585	0.941	0.774	1.63002e-267
Rpl13	1.33996e-266	0.358321	0.974	0.853	2.50223e-262
Uqcc2	1.18497e-263	0.768569	0.636	0.449	2.21282e-259
Plxdc2	3.12741e-262	0.521624	0.677	0.435	5.84012e-258
Loxl1	1.34198e-261	0.474281	0.765	0.484	2.50602e-257
Tshz2	2.11799e-261	0.578938	0.661	0.456	3.95513e-257
Antxr2	1.4503e-257	0.617318	0.515	0.284	2.70829e-253
Postn	2.09454e-253	1.26232	0.58	0.343	3.91135e-249
Uap1	9.52816e-251	0.808228	0.542	0.353	1.77929e-246
Meg3	7.02229e-249	0.587602	0.75	0.489	1.31134e-244
Il4ra	7.73936e-249	0.657292	0.357	0.152	1.44525e-244
Serping1	4.30575e-244	0.385054	0.91	0.623	8.04056e-240
Pygl	2.10718e-243	0.519093	0.267	0.086	3.93495e-239
Cxcl13	4.23989e-235	1.17821	0.346	0.136	7.91757e-231
Gstm1	5.54574e-233	0.527978	0.793	0.6	1.03561e-228
Sema3b	2.35923e-231	0.423568	0.243	0.071	4.40563e-227
Lama4	1.44904e-229	0.607978	0.558	0.362	2.70594e-225
Gngt2	4.27243e-229	0.541571	0.439	0.224	7.97834e-225
Errfi1	6.48931e-227	0.6758	0.602	0.398	1.21181e-222
Sod3	7.1333e-225	0.562433	0.57	0.356	1.33207e-220
Lgi2	1.35234e-223	0.592059	0.349	0.151	2.52537e-219
Rps10	6.09006e-223	0.348973	0.935	0.797	1.13726e-218
Ptgs2	1.10925e-222	0.710612	0.206	0.054	2.07141e-218
Gpc3	1.91516e-220	0.427623	0.552	0.307	3.57636e-216
Osr1	1.27234e-219	0.373649	0.457	0.213	2.37596e-215
St3gal2	8.14143e-219	0.568613	0.391	0.192	1.52033e-214
Arhgap20	5.87729e-218	0.546653	0.319	0.127	1.09753e-213
Glud1	1.3493e-216	0.583426	0.61	0.445	2.51967e-212
Rock2	7.68601e-215	0.592141	0.66	0.497	1.43529e-210
Myh10	1.03681e-214	0.542478	0.299	0.118	1.93614e-210
Vcan	1.89822e-213	0.640813	0.477	0.282	3.54473e-209
Pdpn	1.10549e-207	0.571402	0.376	0.183	2.06439e-203
Rps8	6.59571e-206	0.356128	0.943	0.779	1.23168e-201
Dcbld2	1.78905e-203	0.537092	0.327	0.145	3.34088e-199
Vegfd	3.15713e-201	0.582306	0.295	0.119	5.89563e-197
Has1	7.01707e-201	0.79643	0.29	0.116	1.31037e-196
Ptgs1	5.45761e-200	0.450081	0.225	0.069	1.01915e-195
Arsi	1.96688e-199	0.469627	0.248	0.087	3.67295e-195
Plxna1	3.21286e-198	0.485351	0.245	0.086	5.99969e-194
Rpl23	1.13586e-197	0.335781	0.962	0.829	2.1211e-193
Psd3	2.67467e-195	0.495259	0.271	0.104	4.99468e-191
Rab7b	8.45292e-195	0.51544	0.334	0.153	1.5785e-190
Kif2a	3.37011e-194	0.58421	0.416	0.232	6.29335e-190
Aspn	1.11996e-193	0.478295	0.59	0.369	2.09142e-189
Ifi204	2.41714e-189	0.497709	0.605	0.399	4.51377e-185
Hdac7	4.19876e-189	0.564998	0.382	0.2	7.84076e-185
Rpl37a	2.62139e-188	0.47395	0.933	0.776	4.89519e-184
Tgfb2	3.7824e-188	0.494481	0.279	0.109	7.06326e-184
Rps20	1.21737e-187	0.315908	0.953	0.798	2.27332e-183
Dact1	6.16905e-186	0.49439	0.34	0.153	1.15201e-181
Lamc1	9.78377e-186	0.494881	0.66	0.489	1.82702e-181
Csrp2	1.13409e-185	0.415398	0.637	0.435	2.11781e-181
Grb10	6.31262e-182	0.585728	0.469	0.296	1.17882e-177
Agpat4	3.36384e-178	0.56548	0.4	0.226	6.28163e-174
Rps5	1.34663e-177	0.333552	0.956	0.835	2.5147e-173
C1qtnf1	3.93609e-176	0.483514	0.329	0.153	7.35025e-172
Rab32	7.45963e-174	0.430421	0.201	0.065	1.39301e-169
Slco3a1	1.79101e-173	0.495066	0.377	0.198	3.34453e-169
Thbs3	2.77306e-173	0.440603	0.363	0.174	5.17841e-169
Npr1	2.89316e-173	0.524083	0.352	0.181	5.40268e-169
Eef1b2	6.76578e-173	0.371685	0.862	0.714	1.26344e-168
Ar	1.49564e-171	0.483618	0.539	0.347	2.79296e-167
Calu	1.66225e-171	0.4727	0.696	0.544	3.10409e-167
Flnb	1.8778e-165	0.435107	0.293	0.13	3.50661e-161
Irak3	2.5757e-163	0.470349	0.287	0.128	4.80986e-159
Klf3	7.72572e-163	0.496665	0.532	0.362	1.4427e-158
Ybx3	1.00936e-161	0.442017	0.688	0.563	1.88488e-157
Vgll3	5.2971e-161	0.496181	0.316	0.153	9.89181e-157
Vldlr	6.23035e-161	0.512847	0.304	0.143	1.16345e-156
Dpysl3	1.35921e-160	0.521257	0.481	0.317	2.53819e-156
Rps26	8.18366e-160	0.36763	0.884	0.71	1.52822e-155
Dnm1	8.99363e-160	0.441251	0.234	0.091	1.67947e-155
Tpt1	1.2793e-159	0.252859	0.969	0.879	2.38896e-155
Rack1	3.93166e-159	0.340617	0.869	0.745	7.34198e-155
Epb41l3	8.90026e-159	0.439884	0.255	0.107	1.66203e-154
Xdh	1.95535e-158	0.490948	0.448	0.281	3.65143e-154
Gnpnat1	2.02364e-157	0.581207	0.405	0.251	3.77895e-153
Abi3bp	6.26698e-153	0.430761	0.57	0.373	1.17029e-148
Epb41l2	2.3156e-152	0.478427	0.577	0.428	4.32416e-148
Rpl7	3.25111e-152	0.313487	0.919	0.803	6.07112e-148
Dock4	3.61377e-152	0.421911	0.21	0.077	6.74835e-148
Nptn	5.36114e-149	0.483442	0.587	0.457	1.00114e-144
Fgf18	6.87366e-149	0.408792	0.225	0.088	1.28359e-144
Itih5	9.3101e-149	0.365325	0.656	0.491	1.73857e-144
Rpl35a	2.05034e-148	0.359757	0.958	0.837	3.8288e-144
Aebp1	2.61871e-148	0.334807	0.761	0.56	4.89017e-144
Col12a1	6.67697e-148	0.551783	0.24	0.1	1.24686e-143
Add3	9.18123e-148	0.44311	0.574	0.412	1.7145e-143
Kdelc2	1.45627e-143	0.492642	0.372	0.216	2.71944e-139
Lamb1	3.07938e-143	0.373664	0.563	0.384	5.75043e-139
Lima1	4.11703e-142	0.43302	0.668	0.553	7.68814e-138
Plce1	1.64647e-141	0.396929	0.24	0.099	3.07462e-137
Mmp14	5.50448e-141	0.452468	0.657	0.494	1.02791e-136
Lrrc17	8.47337e-140	0.445852	0.321	0.167	1.58232e-135
Stxbp6	1.68458e-138	0.379185	0.231	0.095	3.14578e-134
Rps27a	2.66513e-137	0.292873	0.955	0.816	4.97686e-133
Triobp	9.29448e-137	0.498974	0.393	0.243	1.73565e-132
Cavin1	9.61386e-137	0.378866	0.724	0.574	1.79529e-132
Rhoq	3.93112e-136	0.497601	0.373	0.223	7.34098e-132
Flnc	2.05636e-134	0.44572	0.268	0.13	3.84005e-130
Thy1	1.23912e-133	0.464341	0.545	0.373	2.31394e-129
Thbs2	3.53049e-133	0.424927	0.325	0.171	6.59285e-129
Vat1	7.8741e-132	0.449477	0.562	0.427	1.47041e-127
Rps11	1.96868e-131	0.255179	0.949	0.833	3.67632e-127
Megf9	5.52772e-131	0.396271	0.235	0.102	1.03225e-126
Lpar1	1.20162e-130	0.461012	0.468	0.318	2.2439e-126
Crip1	1.41304e-130	0.296359	0.846	0.669	2.63871e-126
Ugp2	6.90763e-130	0.47166	0.474	0.338	1.28993e-125
Htra1	1.0788e-129	0.290376	0.732	0.549	2.01455e-125
Adamts2	2.42337e-129	0.391394	0.589	0.439	4.5254e-125
Tgfbr3	2.79724e-128	0.464195	0.541	0.402	5.22357e-124
Cast	3.273e-128	0.446528	0.577	0.455	6.11201e-124
Bag1	7.22774e-128	0.41638	0.628	0.513	1.34971e-123
Oaf	3.34789e-127	0.341516	0.647	0.464	6.25185e-123
Gxylt2	4.61216e-127	0.420769	0.365	0.206	8.61275e-123
Steap3	8.17002e-126	0.476473	0.442	0.297	1.52567e-121
Nfix	9.71395e-124	0.349586	0.703	0.576	1.81398e-119
Fam129a	2.17425e-123	0.429443	0.431	0.282	4.06019e-119
Fam171b	1.23526e-122	0.439131	0.224	0.101	2.30672e-118
Sulf2	1.54669e-121	0.385292	0.262	0.126	2.88829e-117
Atp2b1	1.89986e-121	0.387468	0.606	0.485	3.5478e-117
Gprc5b	8.47683e-121	0.461009	0.326	0.188	1.58296e-116
Rps14	1.08931e-120	0.263946	0.967	0.869	2.03418e-116
Rpl22	2.15621e-120	0.326119	0.86	0.744	4.02651e-116
Dock11	9.80754e-120	0.366233	0.225	0.099	1.83146e-115
Mmp23	3.44747e-118	0.325886	0.529	0.366	6.4378e-114
Sntb2	4.68679e-118	0.454545	0.523	0.403	8.75212e-114
Anpep	1.8021e-117	0.426096	0.332	0.189	3.36525e-113
Spon2	1.42915e-116	0.379203	0.269	0.133	2.66879e-112
Rhou	1.17834e-115	0.44727	0.257	0.131	2.20043e-111
Tmeff2	7.29259e-113	0.376521	0.464	0.315	1.36182e-108
Prkca	1.12928e-112	0.353298	0.251	0.122	2.10882e-108
Sdc2	1.55949e-111	0.408266	0.606	0.482	2.9122e-107
Lbp	6.05677e-110	0.549774	0.353	0.22	1.13104e-105
Cdkn1c	1.58805e-107	0.408077	0.37	0.223	2.96552e-103
Mt2	7.84078e-107	0.277419	0.441	0.26	1.46419e-102
Rplp1	1.14719e-106	0.264163	0.904	0.74	2.14225e-102
Nav1	1.3553e-105	0.383483	0.575	0.445	2.53089e-101
Smim14	6.23412e-105	0.372977	0.68	0.585	1.16416e-100
Srgap1	1.76388e-103	0.3994	0.238	0.12	3.29388e-99
Emp3	1.15771e-101	0.344402	0.728	0.605	2.16191e-97
Smurf2	4.23582e-101	0.402969	0.251	0.132	7.90997e-97
Dtnbp1	3.86661e-100	0.424314	0.504	0.396	7.2205e-96
Clip1	5.13258e-100	0.420337	0.377	0.251	9.58457e-96
C1s1	1.88944e-99	0.284694	0.687	0.529	3.52834e-95
Csf1	3.04734e-99	0.400179	0.474	0.347	5.6906e-95
Cpne8	9.80823e-99	0.314251	0.24	0.118	1.83159e-94
Dsel	3.27584e-97	0.406836	0.274	0.154	6.11731e-93
Tubb2b	4.48193e-97	0.351802	0.247	0.127	8.36955e-93
Fam126a	1.67289e-96	0.351711	0.213	0.102	3.12396e-92
Nenf	3.59702e-95	0.282568	0.773	0.655	6.71707e-91
Sec14l1	6.49441e-94	0.418304	0.343	0.223	1.21277e-89
Sfrp4	3.56343e-93	0.359326	0.293	0.152	6.65434e-89
Zfhx4	4.37889e-93	0.414424	0.392	0.268	8.17713e-89
Sord	2.41072e-92	0.38592	0.223	0.112	4.50178e-88
Plekho2	3.66626e-92	0.357381	0.252	0.137	6.84637e-88
Celf2	9.95169e-92	0.321679	0.645	0.527	1.85838e-87
Abca1	1.00035e-91	0.424135	0.324	0.2	1.86806e-87
Il1rl2	1.57059e-91	0.404849	0.213	0.108	2.93292e-87
Xist	1.82921e-90	0.268798	0.834	0.755	3.41587e-86
Jak1	2.11397e-90	0.373749	0.631	0.557	3.94762e-86
Reck	9.41878e-90	0.344379	0.214	0.105	1.75886e-85
Adam33	3.47642e-89	0.415116	0.293	0.169	6.49186e-85
Ehd1	3.80226e-88	0.342668	0.455	0.341	7.10034e-84
Plac8	5.33773e-88	0.587756	0.341	0.206	9.96767e-84
Zeb1	4.2373e-86	0.384614	0.418	0.297	7.91273e-82
Rhoa	4.4802e-86	0.291777	0.778	0.702	8.36632e-82
Itgb5	1.18913e-85	0.40574	0.47	0.368	2.22057e-81
Lrp1	1.31543e-85	0.253989	0.694	0.55	2.45644e-81
Ptp4a2	2.67323e-85	0.334777	0.675	0.605	4.99199e-81
Arhgap29	3.22287e-85	0.405247	0.411	0.297	6.01839e-81
Kcnq1ot1	5.51401e-84	0.522276	0.56	0.47	1.02969e-79
Notch2	3.12784e-83	0.419192	0.207	0.106	5.84093e-79
Adamtsl1	5.25734e-83	0.363266	0.36	0.235	9.81756e-79
Txn1	6.25815e-83	0.340641	0.762	0.66	1.16865e-78
Spag9	5.21492e-82	0.359305	0.532	0.435	9.73834e-78
Tubb6	8.67115e-80	0.295886	0.477	0.347	1.61925e-75
Galnt1	1.05658e-79	0.40715	0.384	0.279	1.97306e-75
Naaa	4.49879e-79	0.37498	0.313	0.203	8.40104e-75
Zeb2	6.47445e-79	0.328618	0.587	0.488	1.20904e-74
Lars2	7.93107e-79	0.432832	0.399	0.275	1.48105e-74
Cdon	1.72876e-78	0.329296	0.26	0.147	3.22829e-74
Sash1	4.20942e-78	0.392723	0.455	0.354	7.86067e-74
Olfml2b	5.77818e-78	0.263711	0.444	0.311	1.07902e-73
Tbc1d12	7.03438e-78	0.317198	0.204	0.105	1.3136e-73
Csgalnact2	1.55743e-76	0.389982	0.278	0.173	2.90835e-72
C1galt1	1.45109e-75	0.365032	0.249	0.146	2.70977e-71
Sh3pxd2b	4.49101e-75	0.436249	0.297	0.196	8.38651e-71
Epdr1	1.21361e-73	0.327697	0.235	0.132	2.2663e-69
Nin	1.24038e-73	0.338925	0.239	0.137	2.31628e-69
Gm42418	1.52213e-73	0.666597	0.764	0.715	2.84242e-69
Col5a1	4.26614e-73	0.314885	0.637	0.511	7.9666e-69
Rpl21	1.03219e-72	0.286348	0.882	0.786	1.92752e-68
Dock7	1.6704e-72	0.386708	0.318	0.214	3.1193e-68
Blvrb	1.10707e-71	0.357932	0.522	0.438	2.06735e-67
Nisch	7.30568e-70	0.356013	0.536	0.467	1.36426e-65
Loxl2	1.11115e-69	0.405896	0.474	0.382	2.07496e-65
Cavin3	8.18136e-69	0.258328	0.751	0.638	1.52779e-64
Ang	4.31957e-67	0.418637	0.332	0.239	8.06636e-63
Nav3	1.03068e-66	0.366958	0.207	0.119	1.92469e-62
Pxdn	7.34378e-66	0.343932	0.252	0.156	1.37138e-61
Klhl13	1.10395e-63	0.32506	0.249	0.154	2.06152e-59
Slc43a3	1.85567e-63	0.339123	0.58	0.492	3.46527e-59
Rps29	9.42774e-63	0.317596	0.852	0.758	1.76054e-58
Snx21	9.81026e-63	0.363076	0.265	0.173	1.83197e-58
Diaph1	2.43401e-62	0.305574	0.331	0.229	4.54526e-58
Sh3d19	2.94331e-62	0.35463	0.369	0.274	5.49634e-58
Apbb2	5.32902e-62	0.296664	0.31	0.207	9.95142e-58
Tspan5	1.87646e-60	0.27512	0.221	0.13	3.5041e-56
Twsg1	2.29553e-60	0.347097	0.339	0.242	4.28668e-56
Rbms3	2.35254e-60	0.333006	0.404	0.311	4.39314e-56
Cpq	6.22663e-60	0.324024	0.475	0.384	1.16276e-55
Rpl38	7.1886e-60	0.303852	0.767	0.662	1.3424e-55
Cep170	2.56656e-59	0.365422	0.306	0.216	4.79279e-55
Tshz1	3.37895e-59	0.332342	0.238	0.149	6.30986e-55
C4b	4.99792e-59	0.346263	0.256	0.159	9.33312e-55
Tmem43	1.07174e-58	0.335223	0.272	0.182	2.00137e-54
Wls	4.6023e-58	0.336695	0.415	0.334	8.59433e-54
Twist1	3.20954e-57	0.353867	0.336	0.248	5.99349e-53
Pcsk5	2.17023e-56	0.290888	0.211	0.124	4.05268e-52
Nedd4	4.63415e-56	0.254192	0.802	0.749	8.65381e-52
Zfp36l1	7.32663e-56	0.302763	0.703	0.628	1.36818e-51
Nckap1	1.32748e-55	0.354194	0.394	0.316	2.47893e-51
Rap1b	1.43841e-55	0.264683	0.614	0.555	2.68609e-51
Slc25a24	3.49408e-55	0.306311	0.217	0.132	6.52484e-51
Tacc2	9.68091e-55	0.300733	0.235	0.147	1.80781e-50
Cmip	2.01956e-54	0.274051	0.249	0.159	3.77133e-50
Carhsp1	3.02793e-54	0.379603	0.41	0.337	5.65436e-50
Rps6ka3	1.04189e-53	0.354698	0.309	0.225	1.94563e-49
Dapk1	2.64917e-53	0.381564	0.364	0.284	4.94705e-49
Akr1b8	3.79466e-53	0.392681	0.286	0.206	7.08615e-49
Fam102b	2.37795e-52	0.308814	0.341	0.252	4.44059e-48
Rps28	8.73733e-52	0.272125	0.819	0.699	1.63161e-47
Atox1	9.44609e-52	0.25482	0.661	0.579	1.76396e-47
Mylip	2.0446e-50	0.290725	0.28	0.192	3.81809e-46
Dclk1	1.84608e-49	0.346364	0.396	0.315	3.44736e-45
Pxn	2.5101e-49	0.285825	0.241	0.158	4.68735e-45
Slc44a1	3.25067e-49	0.287984	0.325	0.243	6.07031e-45
Ralbp1	4.518e-49	0.263547	0.605	0.553	8.43692e-45
Man2a1	5.67344e-49	0.311196	0.42	0.344	1.05946e-44
Clec2d	4.4348e-48	0.288394	0.384	0.301	8.28155e-44
Agap1	5.97105e-48	0.279617	0.254	0.171	1.11503e-43
Camk2n1	1.36992e-47	0.32833	0.352	0.269	2.55818e-43
Zfhx3	1.45004e-47	0.312652	0.36	0.281	2.70781e-43
Ctdsp2	2.15889e-46	0.334746	0.466	0.412	4.03151e-42
Stk38	1.66549e-44	0.311313	0.322	0.245	3.11014e-40
Cyfip1	2.90493e-44	0.302921	0.379	0.306	5.42467e-40
Arl4a	3.20738e-44	0.317671	0.423	0.349	5.98947e-40
Abl1	4.14899e-44	0.275009	0.228	0.153	7.74783e-40
Golim4	6.434e-44	0.307978	0.453	0.395	1.20148e-39
Nmt2	1.52237e-43	0.264892	0.203	0.13	2.84287e-39
Mia3	1.72508e-43	0.346818	0.406	0.344	3.22141e-39
Clasp1	4.02354e-43	0.277726	0.206	0.134	7.51355e-39
Samd4b	1.13105e-42	0.323483	0.297	0.226	2.11212e-38
Trip10	4.98382e-41	0.295365	0.354	0.288	9.30679e-37
Aida	4.26181e-40	0.306668	0.434	0.375	7.9585e-36
Efcab14	5.27875e-40	0.299559	0.316	0.247	9.85754e-36
Fer	9.04935e-40	0.268573	0.239	0.166	1.68988e-35
Adam17	1.22062e-39	0.310876	0.253	0.183	2.27938e-35
Ssc5d	3.54343e-39	0.297872	0.222	0.153	6.617e-35
Pde3a	4.86156e-39	0.270747	0.227	0.154	9.07848e-35
Ptgfrn	1.67214e-38	0.302404	0.346	0.28	3.12256e-34
Sspn	5.67441e-38	0.282718	0.267	0.195	1.05964e-33
Pmm1	6.87036e-38	0.425262	0.341	0.289	1.28297e-33
Wipf1	9.30971e-38	0.260275	0.297	0.223	1.7385e-33
Ifi205	9.96895e-38	0.313693	0.35	0.279	1.8616e-33
Thra	1.53561e-37	0.283554	0.434	0.377	2.86759e-33
Lrch3	2.4444e-37	0.286528	0.242	0.171	4.56467e-33
Micu1	1.89284e-36	0.264393	0.224	0.158	3.53469e-32
Cdc42ep2	4.34145e-36	0.281796	0.304	0.237	8.10723e-32
Cmtm3	2.76185e-35	0.265784	0.415	0.356	5.15748e-31
Taok3	1.41209e-34	0.263148	0.289	0.222	2.63694e-30
Ppa1	1.44373e-33	0.330019	0.336	0.281	2.69602e-29
Nfe2l2	1.36229e-31	0.285742	0.409	0.365	2.54393e-27
Rala	2.33746e-31	0.266768	0.478	0.448	4.36497e-27
Arhgap42	4.03945e-31	0.250418	0.206	0.146	7.54328e-27
Prdx5	2.07862e-30	0.264499	0.604	0.565	3.88161e-26
BC005537	6.72874e-30	0.266843	0.473	0.442	1.25652e-25
Col6a2	5.23975e-29	0.276906	0.653	0.542	9.78471e-25
Trim30a	1.65842e-27	0.295506	0.261	0.204	3.09693e-23
Atp6v1e1	5.64747e-27	0.285793	0.391	0.353	1.05461e-22
Pgm3	6.0916e-27	0.250827	0.213	0.16	1.13755e-22
Ergic1	6.51783e-27	0.280882	0.284	0.234	1.21714e-22
Arhgap21	2.4171e-26	0.272987	0.251	0.194	4.5137e-22
Egfr	3.99914e-26	0.262609	0.35	0.301	7.46799e-22
Acadsb	5.8123e-26	0.273118	0.275	0.224	1.08539e-21
Lgals9	5.93458e-25	0.265592	0.37	0.327	1.10822e-20
Abi1	1.36391e-23	0.253393	0.265	0.216	2.54696e-19
Zbp1	1.4481e-22	0.293601	0.231	0.18	2.70419e-18
Dlgap4	2.56398e-22	0.259292	0.357	0.321	4.78798e-18
mt-Co1	1.76196e-05	0.285999	0.217	0.193	0.329028

## Sheet: ASC3
	p_val	avg_logFC	pct.1	pct.2	p_val_adj
Apod	0	2.33491	0.698	0.203	0
Inmt	0	2.0306	0.594	0.095	0
Mgp	0	1.95757	0.684	0.195	0
Gdf10	0	1.858	0.602	0.104	0
Mfap4	0	1.79192	0.352	0.065	0
Cygb	0	1.76521	0.915	0.396	0
F3	0	1.76239	0.752	0.326	0
Fbln1	0	1.75599	0.783	0.21	0
Mmp3	0	1.71187	0.41	0.11	0
Tgfbi	0	1.59218	0.671	0.149	0
Cfh	0	1.51478	0.596	0.081	0
Cst3	0	1.45693	0.9	0.682	0
Rbp1	0	1.37989	0.718	0.273	0
Bgn	0	1.35094	0.856	0.419	0
Gas6	0	1.32012	0.643	0.247	0
Fmo2	0	1.31638	0.483	0.06	0
Clec11a	0	1.27595	0.494	0.098	0
Itgbl1	0	1.26487	0.443	0.031	0
Igfbp4	0	1.22023	0.884	0.571	0
Pdgfrl	0	1.19456	0.409	0.091	0
Gsn	0	1.18811	0.978	0.577	0
Tspan11	0	1.16918	0.413	0.042	0
Sfrp4	0	1.16722	0.396	0.131	0
Igfbp7	0	1.16282	0.938	0.57	0
Col1a1	0	1.13364	0.859	0.556	0
Serping1	0	1.10814	0.96	0.624	0
Dcn	0	1.09935	0.98	0.635	0
Entpd2	0	1.09681	0.724	0.341	0
Il11ra1	0	1.09581	0.812	0.426	0
Col1a2	0	1.06947	0.919	0.601	0
Chrdl1	0	1.06319	0.432	0.084	0
C2	0	1.05005	0.463	0.103	0
Selenop	0	1.0475	0.893	0.609	0
Penk	0	1.04086	0.28	0.053	0
Pid1	0	1.01487	0.504	0.12	0
Serpinf1	0	1.00923	0.927	0.575	0
Podn	0	0.985788	0.504	0.141	0
C7	0	0.974542	0.24	0.004	0
Olfml3	0	0.973873	0.49	0.206	0
Vit	0	0.960374	0.383	0.047	0
Osr1	0	0.957258	0.529	0.205	0
Ltbp4	0	0.917127	0.713	0.333	0
Nbl1	0	0.887457	0.714	0.398	0
Gpc3	0	0.863221	0.625	0.3	0
Igf1	0	0.853696	0.556	0.249	0
Lum	0	0.828008	0.865	0.486	0
Cd302	0	0.805572	0.799	0.477	0
Fth1	0	0.771987	0.946	0.823	0
Ntrk2	0	0.764333	0.513	0.213	0
Gas1	0	0.759252	0.618	0.341	0
Abca8a	0	0.754051	0.712	0.362	0
Gpnmb	0	0.750243	0.33	0.087	0
Pcolce	0	0.744465	0.856	0.472	0
Abi3bp	0	0.744343	0.682	0.352	0
Smoc2	0	0.742565	0.599	0.253	0
Ecm1	0	0.738975	0.736	0.438	0
Meox2	0	0.737531	0.443	0.16	0
Aebp1	0	0.72785	0.808	0.557	0
Nr2f2	0	0.708705	0.412	0.151	0
Epha3	0	0.7085	0.25	0.01	0
Srpx	0	0.69205	0.639	0.331	0
Ctsl	0	0.680886	0.873	0.664	0
Dkk3	0	0.659062	0.26	0.038	0
Gabra3	0	0.62647	0.271	0.04	0
Ppl	0	0.596603	0.27	0.05	0
Spock2	0	0.591708	0.259	0.044	0
Cpe	0	0.570183	0.328	0.087	0
Clec3b	0	0.534877	0.92	0.542	0
Abcc9	0	0.51093	0.277	0.037	0
Igfbp6	0	0.390906	0.917	0.447	0
Cd9	0	0.374343	0.834	0.424	0
Olfml2b	9.50548e-306	0.709453	0.556	0.287	1.77505e-301
Pcolce2	6.20296e-298	0.491092	0.745	0.383	1.15834e-293
Ifitm1	7.84776e-298	1.08886	0.237	0.051	1.46549e-293
C1s1	8.30291e-297	0.612906	0.773	0.513	1.55049e-292
Nfib	2.66374e-296	0.667502	0.804	0.622	4.97426e-292
Pmepa1	1.36331e-293	0.73609	0.523	0.261	2.54585e-289
Col3a1	3.2192e-290	0.709082	0.845	0.582	6.01153e-286
Gstm1	2.50265e-286	0.536826	0.847	0.594	4.67345e-282
Hexb	2.18438e-284	0.687687	0.568	0.324	4.07912e-280
Itm2b	1.09847e-282	0.424892	0.956	0.873	2.05128e-278
Bicc1	2.58037e-278	0.681381	0.643	0.398	4.81858e-274
Lamb2	4.45967e-273	0.619353	0.556	0.291	8.32798e-269
Rcn3	6.15288e-273	0.629757	0.778	0.517	1.14899e-268
Cxcl12	2.92783e-269	0.900649	0.666	0.408	5.46743e-265
C1qtnf2	1.28045e-255	0.621409	0.322	0.11	2.39112e-251
Wnt5a	4.96534e-254	0.686542	0.395	0.165	9.27227e-250
Fgf7	6.34155e-249	0.568954	0.333	0.121	1.18422e-244
Hmcn2	5.58142e-247	0.577941	0.225	0.054	1.04227e-242
Col4a4	2.09054e-239	0.542553	0.214	0.051	3.90388e-235
Svep1	8.48782e-216	0.639728	0.438	0.221	1.58501e-211
C1qtnf7	3.0207e-212	0.538725	0.303	0.111	5.64085e-208
Lrp1	1.19215e-211	0.489803	0.76	0.539	2.22622e-207
Cped1	8.73451e-211	0.653693	0.422	0.209	1.63108e-206
C1ra	3.37914e-204	0.577183	0.57	0.357	6.3102e-200
Steap4	9.97561e-204	0.523136	0.514	0.275	1.86285e-199
Nfix	6.80145e-202	0.562989	0.727	0.575	1.2701e-197
Ndrg2	1.75083e-200	0.603407	0.391	0.182	3.2695e-196
Serpinh1	3.73462e-198	0.400845	0.89	0.634	6.97404e-194
Gxylt2	3.7928e-198	0.546053	0.419	0.199	7.08268e-194
Ctsz	4.50288e-194	0.495946	0.774	0.582	8.40868e-190
Csrp2	4.94866e-191	0.60452	0.648	0.442	9.24113e-187
Dbp	3.64326e-189	0.631449	0.461	0.25	6.80342e-185
Gstm2	1.51411e-188	0.569013	0.605	0.396	2.82745e-184
Col14a1	3.14499e-187	0.435098	0.693	0.412	5.87295e-183
Ndn	6.32265e-183	0.533144	0.623	0.428	1.18069e-178
Nupr1	5.50451e-181	0.476253	0.672	0.425	1.02791e-176
Thbs3	3.92099e-180	0.446024	0.383	0.178	7.32206e-176
Sparc	1.46323e-178	0.628316	0.852	0.716	2.73243e-174
Bace2	4.72959e-178	0.519684	0.228	0.076	8.83204e-174
Pltp	5.57266e-178	0.489632	0.268	0.099	1.04064e-173
Il6st	3.61544e-175	0.527738	0.608	0.428	6.75147e-171
Dpep1	6.40172e-173	0.417734	0.761	0.499	1.19546e-168
Igfbp3	2.13841e-172	1.34099	0.293	0.124	3.99327e-168
Lsamp	1.33671e-170	0.507042	0.23	0.079	2.49618e-166
Fkbp9	1.78277e-170	0.461658	0.718	0.523	3.32914e-166
Nenf	9.38007e-169	0.449806	0.815	0.65	1.75163e-164
Prdx4	1.23123e-166	0.486664	0.664	0.465	2.29919e-162
Crispld2	9.9786e-166	0.587298	0.352	0.168	1.8634e-161
Nrp1	1.20626e-163	0.550222	0.502	0.308	2.25257e-159
Ddost	3.55862e-161	0.508038	0.698	0.523	6.64536e-157
Fxyd6	1.14912e-160	0.471987	0.279	0.115	2.14586e-156
3632451O06Rik	1.56302e-160	0.437317	0.236	0.088	2.91879e-156
Ar	2.91411e-159	0.471758	0.557	0.352	5.4418e-155
Fbln2	1.58615e-158	0.550569	0.68	0.496	2.96197e-154
Ahnak	1.92798e-158	0.515655	0.861	0.744	3.60031e-154
Laptm4a	5.06565e-158	0.385718	0.908	0.792	9.45959e-154
Rnase4	1.0747e-155	0.344563	0.857	0.611	2.0069e-151
Pdlim2	1.12548e-154	0.53951	0.556	0.378	2.10172e-150
Gstt1	1.75708e-154	0.489119	0.535	0.339	3.28118e-150
Slit3	1.40936e-152	0.501268	0.488	0.302	2.63184e-148
Mxra7	2.28501e-152	0.514123	0.582	0.404	4.26702e-148
Ahnak2	8.09557e-151	0.407804	0.562	0.347	1.51177e-146
Naalad2	1.07718e-150	0.482178	0.36	0.183	2.01153e-146
Cebpd	3.18506e-149	0.497569	0.718	0.52	5.94778e-145
Selenom	4.75255e-149	0.422026	0.814	0.62	8.87492e-145
Ergic3	2.01097e-148	0.502366	0.658	0.499	3.75529e-144
Ms4a4d	2.16294e-147	0.496997	0.507	0.314	4.03907e-143
Fkbp7	2.74728e-147	0.482131	0.631	0.438	5.13028e-143
Lhfp	5.67177e-147	0.498344	0.546	0.369	1.05915e-142
Scn7a	2.01098e-146	0.252327	0.439	0.246	3.7553e-142
Adamts2	2.62732e-145	0.489689	0.616	0.439	4.90626e-141
Ftl1	1.53141e-144	0.320168	0.933	0.768	2.85975e-140
Ifitm2	3.50137e-142	0.38934	0.89	0.728	6.53846e-138
Slco2b1	2.26536e-140	0.406814	0.202	0.071	4.23033e-136
Fos	2.87157e-136	0.378881	0.844	0.719	5.36237e-132
Cdon	5.88506e-136	0.40811	0.305	0.14	1.09898e-131
Ctsb	2.48335e-135	0.428982	0.811	0.667	4.63741e-131
Gpx8	3.21475e-135	0.431433	0.664	0.466	6.00322e-131
Lamp1	3.88568e-134	0.353162	0.837	0.744	7.25613e-130
Klf9	1.24012e-133	0.458447	0.758	0.601	2.31579e-129
Fcgrt	1.42842e-133	0.381281	0.776	0.6	2.66743e-129
Scara5	2.74692e-133	0.368971	0.577	0.363	5.1296e-129
Ctsk	1.20203e-131	0.545913	0.535	0.366	2.24466e-127
Pdgfra	2.27962e-131	0.400374	0.627	0.427	4.25697e-127
Angptl1	3.84378e-130	0.743883	0.374	0.213	7.17788e-126
Mmp2	9.55191e-130	0.383749	0.731	0.526	1.78372e-125
Fmo1	1.53478e-129	0.39553	0.276	0.124	2.86605e-125
Fzd2	4.04815e-127	0.422992	0.245	0.105	7.55952e-123
Igsf10	1.32921e-126	0.510655	0.378	0.218	2.48218e-122
Oat	1.02927e-125	0.42301	0.668	0.515	1.92206e-121
Ecm2	2.05409e-123	0.427144	0.419	0.248	3.8358e-119
Tmem119	4.95313e-123	0.4531	0.374	0.211	9.24947e-119
Eln	3.92033e-122	1.15696	0.457	0.296	7.32083e-118
Prg4	2.68748e-121	0.6235	0.231	0.097	5.0186e-117
Adam33	7.00135e-119	0.385536	0.327	0.166	1.30743e-114
Mfap2	1.02557e-118	0.458746	0.476	0.31	1.91514e-114
Aldh2	1.01864e-117	0.372475	0.707	0.563	1.9022e-113
Tmed3	4.8424e-117	0.367049	0.766	0.577	9.04269e-113
Hexa	4.46804e-116	0.38743	0.626	0.455	8.34361e-112
Atp1a2	1.17246e-115	0.389842	0.265	0.124	2.18945e-111
Prrx1	1.65465e-114	0.320594	0.688	0.51	3.0899e-110
P3h3	2.60963e-114	0.41899	0.474	0.32	4.87322e-110
Rap2a	6.93597e-114	0.414616	0.332	0.183	1.29522e-109
Dnajc3	6.18793e-113	0.407739	0.646	0.514	1.15553e-108
Emp1	2.32842e-112	0.426886	0.624	0.448	4.34809e-108
Scpep1	4.84695e-111	0.423795	0.476	0.325	9.05119e-107
Mmp23	7.57221e-111	0.534439	0.525	0.376	1.41403e-106
Serpina3n	8.97604e-111	0.524581	0.233	0.105	1.67619e-106
Jun	6.80087e-110	0.333296	0.816	0.689	1.26999e-105
Tmeff2	1.72651e-109	0.476624	0.472	0.321	3.22408e-105
Fuca1	2.14281e-106	0.411843	0.576	0.44	4.00149e-102
Nucb2	1.02875e-101	0.453837	0.454	0.319	1.9211e-97
Thbd	2.24151e-100	0.616053	0.42	0.273	4.1858e-96
Adamts10	1.44682e-98	0.353416	0.229	0.108	2.70179e-94
Ccdc80	2.98616e-98	0.48389	0.639	0.499	5.57635e-94
Nr1d1	1.21355e-97	0.372077	0.377	0.226	2.26619e-93
Copz2	1.31897e-96	0.460604	0.56	0.413	2.46304e-92
Gadd45g	1.94942e-96	0.489329	0.51	0.351	3.64036e-92
Dusp1	2.01128e-96	0.367396	0.735	0.599	3.75587e-92
Arhgdib	3.2558e-96	0.271753	0.255	0.12	6.07988e-92
Ubb	2.43068e-95	0.349285	0.892	0.813	4.53905e-91
Dpp7	2.98283e-95	0.349233	0.232	0.113	5.57013e-91
Herpud1	8.46947e-93	0.450648	0.475	0.342	1.58159e-88
Nox4	8.59635e-93	0.35065	0.233	0.111	1.60528e-88
Ntn1	8.55306e-92	0.325617	0.273	0.14	1.5972e-87
Bsg	3.38315e-91	0.298815	0.811	0.689	6.3177e-87
Tnfsf12	1.99467e-90	0.395161	0.437	0.302	3.72484e-86
Ogn	5.37507e-90	0.341578	0.699	0.521	1.00374e-85
Mtch1	7.23066e-90	0.334541	0.687	0.565	1.35025e-85
Gem	9.79607e-90	0.385104	0.431	0.287	1.82932e-85
Gm26802	4.09316e-89	0.451065	0.412	0.276	7.64357e-85
Ctsf	4.69808e-87	0.36192	0.306	0.178	8.77319e-83
Ier3	5.51748e-87	0.333975	0.464	0.312	1.03033e-82
Vkorc1	2.12293e-86	0.362795	0.627	0.458	3.96436e-82
Ggh	2.22263e-86	0.391876	0.485	0.36	4.15054e-82
Icam1	7.25583e-86	0.348875	0.375	0.235	1.35495e-81
Ppib	1.63114e-84	0.275137	0.834	0.717	3.04599e-80
Tm7sf3	1.75156e-83	0.366351	0.35	0.224	3.27086e-79
Sod3	1.46284e-82	0.401006	0.517	0.381	2.7317e-78
Add3	1.47315e-82	0.317833	0.559	0.424	2.75095e-78
Olfml1	1.56221e-82	0.302592	0.206	0.098	2.91727e-78
Sdf4	2.22985e-81	0.356807	0.626	0.51	4.16403e-77
Kitl	2.63136e-80	0.340511	0.363	0.224	4.91379e-76
Frmd6	9.58786e-80	0.383285	0.445	0.315	1.79044e-75
Adh1	1.79031e-79	0.512726	0.231	0.122	3.34323e-75
Hsd11b1	2.33486e-79	0.544475	0.335	0.203	4.36011e-75
Fzd4	2.05763e-78	0.418107	0.396	0.275	3.84241e-74
Rbp4	2.21697e-77	0.515498	0.291	0.171	4.13997e-73
Peg3	3.48336e-77	0.428096	0.288	0.172	6.50483e-73
Adm	2.06773e-76	0.43941	0.212	0.107	3.86128e-72
Ghr	4.49906e-76	0.359403	0.271	0.157	8.40155e-72
Ppic	2.36867e-75	0.310902	0.646	0.495	4.42325e-71
Gabarap	2.93823e-75	0.293003	0.835	0.738	5.48686e-71
Aldh1a1	4.38934e-75	0.342225	0.277	0.161	8.19666e-71
Ssr4	1.44934e-73	0.31985	0.696	0.554	2.7065e-69
Pnp	2.63284e-71	0.386237	0.584	0.473	4.91656e-67
Rbms3	4.8259e-71	0.341707	0.43	0.308	9.01188e-67
Blvrb	7.248e-71	0.318035	0.549	0.435	1.35349e-66
Rab34	2.04052e-70	0.379985	0.399	0.287	3.81047e-66
Slc29a1	2.52144e-70	0.372574	0.504	0.394	4.70854e-66
Lama2	4.61816e-70	0.285924	0.51	0.375	8.62396e-66
Htra3	5.3722e-70	0.255334	0.722	0.545	1.0032e-65
Sfrp1	8.01244e-70	0.572732	0.222	0.12	1.49624e-65
Gm2a	3.44793e-69	0.285662	0.327	0.21	6.43866e-65
Galnt15	3.15533e-68	0.302607	0.228	0.12	5.89227e-64
C4b	7.33229e-68	0.585893	0.268	0.161	1.36923e-63
Lrpap1	1.19659e-67	0.346775	0.508	0.403	2.23452e-63
Twsg1	4.23875e-65	0.291459	0.36	0.242	7.91543e-61
Atf5	1.69057e-62	0.316439	0.524	0.405	3.15696e-58
Itm2a	3.38145e-61	0.489613	0.42	0.313	6.31452e-57
Arap1	3.39839e-61	0.391163	0.239	0.143	6.34616e-57
Rpn2	9.89473e-60	0.287364	0.675	0.574	1.84774e-55
Epb41l2	5.19532e-59	0.299091	0.548	0.443	9.70174e-55
Tmem59	1.39812e-57	0.287948	0.768	0.676	2.61085e-53
Grn	2.27889e-57	0.272811	0.624	0.513	4.25559e-53
Dact1	2.68808e-57	0.390191	0.283	0.178	5.01972e-53
Ank2	1.30247e-55	0.317112	0.254	0.159	2.43222e-51
Nsg1	4.03501e-55	0.271268	0.24	0.145	7.53498e-51
Fam46a	1.66256e-54	0.305174	0.525	0.407	3.10467e-50
Tmem45a	2.61675e-54	0.360876	0.281	0.188	4.88652e-50
Casc4	7.82482e-54	0.278115	0.258	0.162	1.46121e-49
Col16a1	1.77596e-53	0.286812	0.24	0.146	3.31643e-49
Sgce	2.75749e-53	0.28791	0.487	0.387	5.14933e-49
Gpx3	1.69036e-52	0.72018	0.595	0.507	3.15657e-48
Abca9	2.60744e-52	0.302196	0.224	0.132	4.86914e-48
Zic1	2.15607e-50	0.299647	0.203	0.118	4.02625e-46
Rcn1	6.53678e-50	0.263596	0.591	0.477	1.22068e-45
Htra1	1.00933e-49	0.309986	0.671	0.575	1.88482e-45
Gaa	1.08519e-49	0.319896	0.4	0.309	2.02649e-45
Pros1	1.45035e-48	0.309846	0.445	0.354	2.70838e-44
Camk2n1	1.95788e-48	0.265136	0.372	0.268	3.65615e-44
Selenok	2.14734e-48	0.302406	0.799	0.714	4.00994e-44
Abca8b	3.81162e-48	0.27398	0.205	0.119	7.11781e-44
Lrp6	5.4952e-48	0.298763	0.395	0.305	1.02617e-43
Prelp	1.75967e-47	0.284509	0.443	0.337	3.28601e-43
Gstm5	2.08911e-47	0.308805	0.414	0.323	3.90121e-43
Creg1	3.28923e-46	0.262327	0.514	0.411	6.14231e-42
Lysmd2	3.99018e-46	0.33729	0.451	0.367	7.45127e-42
Pam	7.23055e-46	0.313357	0.465	0.358	1.35023e-41
Os9	1.57203e-45	0.267553	0.475	0.391	2.9356e-41
P4ha1	7.05918e-45	0.267661	0.465	0.367	1.31823e-40
Prrx2	5.93842e-44	0.323568	0.235	0.155	1.10894e-39
Tef	3.71823e-43	0.254078	0.231	0.145	6.94342e-39
Atp6ap2	1.16054e-41	0.263931	0.357	0.272	2.1672e-37
Adk	5.42118e-38	0.288958	0.301	0.222	1.01235e-33
Man2a1	6.04262e-38	0.305376	0.423	0.348	1.1284e-33
Slc43a3	7.83065e-38	0.293432	0.578	0.497	1.4623e-33
Plac8	1.44892e-35	0.305074	0.315	0.22	2.70571e-31
Abca6	1.67732e-35	0.269805	0.206	0.13	3.13223e-31
Maged2	3.21168e-34	0.278709	0.438	0.358	5.99749e-30
Scarf2	3.8544e-34	0.285961	0.23	0.161	7.19771e-30
Cp	5.7003e-34	0.321799	0.446	0.348	1.06447e-29
Lox	6.23106e-34	0.474915	0.269	0.202	1.16359e-29
Por	1.00251e-33	0.285983	0.383	0.312	1.87209e-29
Ginm1	3.84048e-33	0.269857	0.421	0.355	7.17171e-29
Twist2	3.16435e-32	0.271864	0.201	0.137	5.90911e-28
Erlec1	1.55029e-31	0.268308	0.425	0.361	2.89501e-27
Akap12	9.279e-31	0.287337	0.444	0.368	1.73276e-26
Ccl8	1.53998e-30	0.288106	0.221	0.151	2.87576e-26
Rap2b	3.94991e-30	0.263301	0.243	0.175	7.37606e-26
Ces2g	4.53536e-30	0.266899	0.214	0.149	8.46934e-26
Gja1	2.20539e-29	0.319469	0.301	0.231	4.11835e-25
Fbln7	3.2771e-28	0.311943	0.275	0.207	6.11967e-24
Tsc22d3	2.38349e-27	0.456826	0.378	0.318	4.45093e-23
Zfyve21	6.57835e-27	0.273082	0.312	0.251	1.22844e-22
Sned1	2.54057e-25	0.323084	0.273	0.213	4.74426e-21
Cdk2ap2	2.50989e-23	0.262186	0.435	0.38	4.68697e-19
Mdk	8.60429e-09	0.267306	0.202	0.176	0.000160677
Sfrp2	0.000290179	0.252875	0.173	0.206	1

## Sheet: ProlifDiff
	p_val	avg_logFC	pct.1	pct.2	p_val_adj
H2afz	0	2.20827	0.964	0.435	0
Stmn1	0	2.01444	0.878	0.121	0
Cks2	0	1.91955	0.832	0.106	0
Pclaf	0	1.84225	0.789	0.035	0
Cenpa	0	1.83253	0.7	0.049	0
Birc5	0	1.76025	0.841	0.037	0
Hmgb2	0	1.74265	0.823	0.23	0
Ube2c	0	1.67498	0.61	0.024	0
Top2a	0	1.65224	0.609	0.02	0
Cenpf	0	1.56532	0.63	0.009	0
Selenoh	0	1.49314	0.869	0.233	0
Mki67	0	1.46926	0.698	0.015	0
Ran	0	1.46285	0.914	0.471	0
Prc1	0	1.37009	0.534	0.012	0
Ccnb2	0	1.36978	0.656	0.029	0
Smc4	0	1.36651	0.824	0.183	0
Cdc20	0	1.35183	0.585	0.023	0
Cdca3	0	1.3178	0.697	0.021	0
Cdk1	0	1.28393	0.607	0.031	0
Smc2	0	1.25131	0.714	0.082	0
Cdca8	0	1.24204	0.686	0.019	0
Cks1b	0	1.21398	0.84	0.287	0
Hmgn2	0	1.20222	0.779	0.163	0
Tpx2	0	1.20145	0.647	0.014	0
Tk1	0	1.18854	0.651	0.025	0
Lockd	0	1.16496	0.66	0.037	0
Ccna2	0	1.09439	0.59	0.008	0
Cenpe	0	1.09372	0.526	0.009	0
Hmmr	0	1.05979	0.54	0.006	0
H2afx	0	1.05238	0.648	0.117	0
Spc24	0	1.03604	0.649	0.025	0
Rrm2	0	1.01671	0.543	0.021	0
Knstrn	0	1.01406	0.596	0.019	0
Cdkn3	0	0.987664	0.533	0.016	0
Ccnb1	0	0.96764	0.423	0.009	0
Cenpm	0	0.964167	0.643	0.025	0
Ccdc34	0	0.928737	0.789	0.216	0
Pimreg	0	0.914589	0.499	0.005	0
Mxd3	0	0.892117	0.492	0.009	0
Tyms	0	0.8874	0.634	0.086	0
Lmnb1	0	0.884071	0.634	0.066	0
Racgap1	0	0.87718	0.546	0.015	0
Spc25	0	0.875726	0.47	0.011	0
Cenpw	0	0.869104	0.615	0.036	0
Pbk	0	0.845546	0.451	0.007	0
Ckap2l	0	0.78402	0.458	0.005	0
Gmnn	0	0.742785	0.499	0.038	0
Tacc3	0	0.72946	0.52	0.02	0
Nusap1	0	0.721523	0.339	0.009	0
Anln	0	0.718358	0.473	0.015	0
Rrm1	0	0.712653	0.566	0.082	0
Plk1	0	0.705485	0.392	0.006	0
Ckap2	0	0.700726	0.427	0.009	0
Pmf1	0	0.684199	0.592	0.058	0
Slfn9	0	0.680389	0.449	0.051	0
Lig1	0	0.677305	0.435	0.056	0
Kif23	0	0.673628	0.362	0.011	0
Dnajc9	0	0.67264	0.595	0.107	0
Mad2l1	0	0.662982	0.505	0.022	0
Knl1	0	0.659821	0.374	0.003	0
Kif20b	0	0.654349	0.375	0.01	0
Incenp	0	0.651791	0.408	0.02	0
Aurkb	0	0.648002	0.373	0.008	0
Nuf2	0	0.640231	0.45	0.005	0
Esco2	0	0.635762	0.338	0.003	0
C330027C09Rik	0	0.634965	0.385	0.01	0
Kif22	0	0.62889	0.374	0.008	0
Aspm	0	0.625071	0.32	0.004	0
Mis18bp1	0	0.621417	0.324	0.004	0
Kif20a	0	0.617183	0.39	0.007	0
Cmc2	0	0.606413	0.621	0.131	0
Aurka	0	0.600748	0.329	0.008	0
Nt5dc2	0	0.59799	0.522	0.077	0
Gins2	0	0.58741	0.461	0.043	0
Tcf19	0	0.583838	0.381	0.03	0
Sgo2a	0	0.582567	0.343	0.006	0
Asf1b	0	0.578353	0.387	0.011	0
Cenpq	0	0.573525	0.422	0.027	0
Uhrf1	0	0.571403	0.381	0.016	0
Rangap1	0	0.569004	0.555	0.099	0
Hmgb3	0	0.565657	0.468	0.064	0
Kif11	0	0.562834	0.334	0.004	0
Diaph3	0	0.545075	0.402	0.011	0
Ncapd2	0	0.527857	0.35	0.018	0
Mcm5	0	0.525661	0.37	0.029	0
Hells	0	0.516822	0.331	0.023	0
Rfc5	0	0.512902	0.472	0.051	0
Rad51ap1	0	0.512776	0.344	0.006	0
Anapc15	0	0.505187	0.489	0.073	0
Cenph	0	0.492087	0.344	0.007	0
Plk4	0	0.486996	0.385	0.03	0
Shcbp1	0	0.469655	0.304	0.006	0
Kif2c	0	0.465905	0.288	0.003	0
Depdc1a	0	0.464375	0.314	0.003	0
Ncapg2	0	0.452731	0.362	0.022	0
Clspn	0	0.452139	0.329	0.016	0
Dbf4	0	0.448193	0.357	0.019	0
Hist1h4i	0	0.448181	0.398	0.034	0
Cit	0	0.445329	0.334	0.02	0
Bub1b	0	0.444888	0.318	0.006	0
Ska1	0	0.442242	0.286	0.003	0
Bub1	0	0.428606	0.276	0.002	0
Ect2	0	0.416572	0.277	0.006	0
Sgo1	0	0.4165	0.257	0.005	0
Cenpk	0	0.415351	0.304	0.013	0
Cep55	0	0.412297	0.288	0.003	0
Rad51	0	0.410667	0.291	0.007	0
Cenpn	0	0.408813	0.327	0.009	0
Ncapg	0	0.405929	0.298	0.004	0
4930579G24Rik	0	0.405109	0.32	0.022	0
Ndc1	0	0.396305	0.357	0.028	0
Cdca2	0	0.395007	0.259	0.004	0
Fen1	0	0.393751	0.352	0.034	0
Syce2	0	0.393456	0.327	0.028	0
Arhgap11a	0	0.392792	0.269	0.007	0
Kif4	0	0.391956	0.25	0.002	0
Fbxo5	0	0.391252	0.245	0.012	0
Cenpp	0	0.379899	0.276	0.008	0
Dlgap5	0	0.37955	0.256	0.003	0
Ndc80	0	0.375801	0.241	0.005	0
Trip13	0	0.370179	0.302	0.012	0
Cenps	0	0.355812	0.285	0.015	0
Kif15	0	0.345725	0.233	0.003	0
Foxm1	0	0.344866	0.261	0.006	0
Ube2t	0	0.343385	0.244	0.009	0
Trim59	0	0.329874	0.253	0.014	0
Nek2	0	0.323226	0.203	0.002	0
Neil3	0	0.315507	0.211	0.002	0
Cdca5	0	0.311331	0.209	0.002	0
Chaf1a	0	0.308639	0.248	0.017	0
Melk	0	0.294652	0.245	0.004	0
Spdl1	0	0.293686	0.221	0.004	0
Ncaph	0	0.28992	0.204	0.006	0
Cdc25c	0	0.286649	0.217	0.001	0
Zwilch	0	0.284681	0.215	0.005	0
Spag5	0	0.281013	0.212	0.003	0
Lsm2	1.50704e-305	0.84304	0.771	0.227	2.81425e-301
Ube2s	8.69037e-302	1.50535	0.897	0.474	1.62284e-297
Ppih	7.68123e-300	0.388627	0.463	0.074	1.43439e-295
Dtl	7.82197e-299	0.306655	0.203	0.013	1.46068e-294
Psat1	6.40764e-295	0.447678	0.473	0.079	1.19656e-290
Lsm5	3.65827e-288	0.852345	0.78	0.251	6.83146e-284
Chaf1b	3.06458e-286	0.279079	0.201	0.013	5.72279e-282
Cdkn2c	3.92788e-286	0.725162	0.474	0.083	7.33491e-282
Gemin6	5.75381e-285	0.350192	0.421	0.064	1.07447e-280
Haus4	3.86611e-277	0.353873	0.361	0.048	7.21957e-273
Rfc4	9.19401e-276	0.403241	0.392	0.058	1.71689e-271
Dut	3.8094e-275	0.803056	0.668	0.178	7.11367e-271
Ezh2	1.04165e-273	0.497792	0.423	0.069	1.94517e-269
Dhfr	2.60366e-272	0.412143	0.349	0.046	4.86207e-268
Ranbp1	2.72753e-269	1.14562	0.885	0.459	5.09339e-265
Itgb3bp	1.1898e-268	0.494436	0.528	0.105	2.22184e-264
Mis18a	2.77281e-268	0.376663	0.369	0.052	5.17795e-264
Lmnb2	6.42535e-268	0.309884	0.248	0.023	1.19987e-263
Tuba1b	2.22576e-265	1.36528	0.89	0.488	4.15639e-261
Anp32b	2.81748e-265	1.1283	0.902	0.51	5.26136e-261
Hmgb1	1.65536e-263	1.08033	0.913	0.521	3.09121e-259
Rcc1	3.87829e-262	0.284446	0.315	0.039	7.24232e-258
Jpt2	4.16303e-259	0.423303	0.431	0.074	7.77404e-255
Dctpp1	1.11801e-257	0.691108	0.641	0.171	2.08778e-253
Tubb5	2.2222e-250	1.51922	0.865	0.473	4.14974e-246
Tmpo	6.94965e-249	0.856886	0.754	0.235	1.29778e-244
Nrm	1.50109e-244	0.358283	0.338	0.048	2.80313e-240
Ska2	1.23368e-243	0.326216	0.304	0.039	2.30377e-239
Rpa2	2.88384e-241	0.396883	0.42	0.074	5.38528e-237
Mcm3	6.02815e-239	0.425488	0.359	0.056	1.1257e-234
Mcm7	2.40316e-236	0.438398	0.379	0.062	4.48766e-232
Pkmyt1	1.31545e-235	0.261537	0.262	0.03	2.45648e-231
Dtymk	3.70721e-235	0.756282	0.752	0.263	6.92285e-231
Nucks1	2.02764e-229	0.954688	0.887	0.462	3.78641e-225
Tubb6	2.74258e-227	1.1073	0.813	0.359	5.12149e-223
Ctsc	2.87651e-225	0.582041	0.612	0.161	5.3716e-221
Alyref	6.73673e-224	0.697661	0.738	0.256	1.25802e-219
Adam12	4.41851e-223	0.419731	0.511	0.115	8.25112e-219
Bora	9.32186e-223	0.274912	0.221	0.022	1.74076e-218
Hirip3	2.58316e-221	0.35248	0.368	0.061	4.82379e-217
Rpa3	1.62954e-220	0.50199	0.65	0.182	3.04301e-216
Atad2	7.69332e-220	0.485551	0.429	0.084	1.43665e-215
Tnc	1.62263e-219	0.968481	0.46	0.101	3.03009e-215
Mthfd2	6.67473e-218	0.435509	0.405	0.076	1.24644e-213
Haus8	1.61608e-216	0.290866	0.335	0.053	3.01787e-212
Timp1	2.85153e-215	1.43842	0.615	0.195	5.32494e-211
Slc25a10	6.80481e-210	0.336516	0.347	0.059	1.27073e-205
Ppil1	7.07249e-208	0.374837	0.503	0.116	1.32072e-203
Pole3	3.08952e-205	0.473819	0.661	0.195	5.76938e-201
Anp32e	4.05249e-205	0.572945	0.698	0.217	7.56762e-201
Rfc2	5.84826e-203	0.485692	0.577	0.156	1.0921e-198
Usp1	9.91424e-197	0.499473	0.6	0.167	1.85138e-192
H2afv	2.90278e-195	1.08376	0.866	0.497	5.42065e-191
Snrpf	7.28133e-195	0.810877	0.846	0.423	1.35972e-190
Lgals1	1.14213e-194	1.141	0.897	0.655	2.13281e-190
Ckap4	1.53902e-194	0.976749	0.803	0.419	2.87396e-190
Ppia	2.59572e-194	0.856395	0.949	0.82	4.84724e-190
Ncaph2	2.52439e-193	0.444327	0.601	0.166	4.71405e-189
Nap1l1	1.18711e-192	0.862381	0.87	0.491	2.21682e-188
Mcm2	1.45441e-190	0.25221	0.252	0.034	2.71596e-186
Hat1	1.16519e-188	0.36913	0.435	0.096	2.17588e-184
Hdgf	3.05377e-186	0.837797	0.858	0.449	5.70261e-182
Rnf26	5.09937e-186	0.36513	0.432	0.095	9.52257e-182
Ddx39	7.32455e-184	0.406391	0.53	0.138	1.36779e-179
Lsm3	3.34859e-183	0.562557	0.714	0.251	6.25315e-179
Sdc1	4.44997e-182	0.487437	0.517	0.138	8.30988e-178
Nasp	2.99123e-181	0.492858	0.616	0.182	5.58582e-177
Ptma	1.00143e-180	0.797081	0.953	0.807	1.87008e-176
Snrpd1	4.76027e-180	0.743667	0.772	0.337	8.88933e-176
Acot7	5.20156e-179	0.357251	0.537	0.144	9.71339e-175
Tfdp1	2.07388e-176	0.370993	0.461	0.111	3.87277e-172
Pcna	1.28964e-175	0.443334	0.404	0.09	2.40827e-171
Tex30	2.01521e-175	0.270968	0.323	0.059	3.7632e-171
Zfp367	5.20589e-175	0.251912	0.207	0.025	9.72148e-171
Nme1	5.4886e-175	0.845771	0.8	0.393	1.02494e-170
Lrrc59	5.62965e-175	0.649793	0.731	0.286	1.05128e-170
Fam111a	2.90542e-173	0.468196	0.563	0.162	5.42557e-169
Ripk3	1.62769e-171	0.254338	0.38	0.081	3.03955e-167
Ccl2	4.55154e-171	1.33194	0.47	0.13	8.49955e-167
Erh	3.89866e-170	0.41643	0.579	0.17	7.28035e-166
Hnrnpa1	4.48842e-170	0.7809	0.848	0.455	8.38168e-166
Tipin	9.12118e-170	0.483632	0.597	0.184	1.70329e-165
Timm8a1	5.34306e-168	0.43065	0.51	0.139	9.97763e-164
Lsm6	1.01373e-165	0.629959	0.793	0.345	1.89305e-161
Nxt1	1.1984e-165	0.395434	0.499	0.135	2.2379e-161
Lyar	6.57826e-165	0.531048	0.655	0.222	1.22842e-160
Cdca4	1.08821e-163	0.272214	0.331	0.065	2.03212e-159
Ncapd3	1.70135e-163	0.345686	0.296	0.053	3.17709e-159
Ccl9	6.18517e-162	0.292371	0.212	0.029	1.15502e-157
Snrpe	1.25054e-161	0.741501	0.842	0.478	2.33526e-157
Dynlt1f	1.63173e-161	0.328258	0.446	0.111	3.04709e-157
Nup37	3.78662e-161	0.28145	0.328	0.065	7.07113e-157
Traf4	4.03997e-161	0.364355	0.472	0.123	7.54424e-157
Cox7a2	1.08893e-160	0.778956	0.882	0.552	2.03347e-156
Fxn	2.04218e-160	0.292969	0.367	0.08	3.81356e-156
Topbp1	9.44741e-160	0.353781	0.355	0.074	1.76421e-155
Dek	1.91968e-158	0.741532	0.834	0.414	3.58481e-154
Cycs	2.42369e-158	0.730908	0.715	0.285	4.526e-154
Cdkn2d	3.56914e-158	0.737661	0.507	0.152	6.66502e-154
Larp7	1.10105e-157	0.339715	0.478	0.125	2.05611e-153
Snrnp25	1.56333e-157	0.302724	0.397	0.091	2.91936e-153
Mrpl18	3.16519e-157	0.764009	0.813	0.406	5.91068e-153
Reep4	3.25498e-157	0.383207	0.338	0.071	6.07835e-153
Hint1	6.56195e-157	0.724302	0.905	0.668	1.22538e-152
Nudt21	8.33493e-157	0.484764	0.742	0.291	1.55646e-152
Rpl41	2.27786e-156	0.934346	0.903	0.75	4.25368e-152
Ubl4a	5.5904e-155	0.442146	0.679	0.238	1.04395e-150
Lypd1	7.16447e-154	0.53458	0.394	0.096	1.33789e-149
Pold2	7.57539e-154	0.320317	0.417	0.102	1.41463e-149
Brip1os	1.90815e-153	0.314988	0.483	0.128	3.56328e-149
H1fx	2.00761e-152	0.382155	0.331	0.069	3.74902e-148
Rad21	2.19434e-151	0.531995	0.65	0.229	4.0977e-147
Nudt5	9.13195e-151	0.309233	0.473	0.129	1.7053e-146
Ak6	3.1771e-150	0.358829	0.54	0.161	5.93291e-146
Nubp1	4.39632e-150	0.324093	0.446	0.116	8.20968e-146
Hnrnpab	5.67099e-150	0.654106	0.844	0.455	1.059e-145
Bmper	1.23936e-149	0.466505	0.595	0.192	2.31439e-145
Pfn1	1.67631e-146	0.703342	0.913	0.676	3.13034e-142
Ssrp1	2.3005e-145	0.579659	0.755	0.325	4.29596e-141
Rpa1	3.58885e-145	0.296296	0.361	0.082	6.70181e-141
Pbdc1	4.92579e-145	0.499209	0.689	0.264	9.19842e-141
Naa50	5.10064e-145	0.556893	0.752	0.326	9.52494e-141
Npm3	1.21625e-144	0.516185	0.708	0.277	2.27122e-140
Nsd2	1.36362e-144	0.310396	0.382	0.092	2.54642e-140
Lsm4	1.02016e-143	0.576749	0.82	0.409	1.90505e-139
Set	1.86757e-143	0.70837	0.841	0.489	3.4875e-139
Mcm6	3.84567e-143	0.423148	0.374	0.092	7.1814e-139
Orc6	5.04049e-143	0.377267	0.498	0.146	9.41261e-139
Nhp2	1.48546e-142	0.660307	0.713	0.302	2.77394e-138
Plp2	2.22827e-142	0.40803	0.644	0.229	4.16108e-138
Cdk4	5.17354e-142	0.651917	0.793	0.395	9.66108e-138
Banf1	6.27489e-142	0.536038	0.773	0.341	1.17177e-137
Hpf1	1.49047e-141	0.409392	0.61	0.208	2.78331e-137
Sox11	1.49949e-141	0.266012	0.256	0.046	2.80015e-137
Prkar2b	2.06589e-141	0.374386	0.423	0.114	3.85784e-137
Cinp	5.12792e-141	0.288604	0.451	0.122	9.57588e-137
H2-Q7	6.37864e-141	0.501291	0.645	0.236	1.19115e-136
Srsf1	7.23933e-141	0.372223	0.682	0.243	1.35187e-136
Fscn1	2.42997e-140	0.503831	0.662	0.244	4.53773e-136
Cxcl9	3.79183e-140	0.764666	0.505	0.161	7.08087e-136
Mrpl51	1.53275e-139	0.550889	0.79	0.368	2.86226e-135
Exosc8	1.93659e-138	0.332622	0.542	0.166	3.61639e-134
Lsm8	2.14642e-138	0.41879	0.654	0.24	4.00822e-134
Ubd	6.1961e-138	0.324394	0.238	0.042	1.15706e-133
Prelid3b	1.75179e-137	0.370048	0.589	0.194	3.2713e-133
Pih1d1	9.12683e-135	0.334418	0.58	0.189	1.70434e-130
Sae1	2.69446e-134	0.449254	0.665	0.246	5.03163e-130
Bok	5.51555e-134	0.388318	0.363	0.088	1.02997e-129
Mrpl42	6.55047e-134	0.659368	0.783	0.388	1.22324e-129
Bcat1	1.35285e-133	0.315017	0.384	0.099	2.52631e-129
Uqcrq	5.38701e-133	0.748906	0.829	0.453	1.00597e-128
Arxes2	3.70928e-132	0.334591	0.236	0.043	6.92672e-128
Sec61g	9.63408e-132	0.753439	0.84	0.519	1.79907e-127
Tmem97	1.09583e-131	0.336056	0.455	0.132	2.04635e-127
Rps27l	2.14692e-131	0.731539	0.867	0.563	4.00915e-127
Snrpg	3.53465e-131	0.312959	0.637	0.229	6.6006e-127
Nde1	5.84751e-131	0.263478	0.417	0.112	1.09196e-126
Gins4	7.23422e-131	0.276998	0.439	0.122	1.35092e-126
2610524H06Rik	5.28442e-130	0.297513	0.443	0.128	9.86812e-126
Phgdh	1.1779e-129	0.392986	0.474	0.144	2.19962e-125
Med30	6.6712e-129	0.365963	0.578	0.196	1.24578e-124
Med9	7.53777e-129	0.269916	0.476	0.141	1.4076e-124
Bola3	5.72051e-128	0.498803	0.733	0.318	1.06825e-123
Slc25a5	1.43401e-127	0.90888	0.779	0.442	2.67787e-123
Psip1	5.81271e-127	0.521032	0.747	0.333	1.08547e-122
Snhg6	1.11791e-126	0.368969	0.592	0.209	2.08759e-122
Txndc12	1.49498e-126	0.323135	0.58	0.199	2.79173e-122
Pdap1	3.55555e-126	0.539653	0.808	0.419	6.63964e-122
Ssna1	2.00762e-125	0.411678	0.743	0.313	3.74903e-121
Nudcd2	2.76513e-125	0.385984	0.678	0.265	5.1636e-121
Ass1	2.49167e-124	0.427847	0.415	0.119	4.65295e-120
Trabd2b	2.71674e-124	0.293369	0.414	0.116	5.07324e-120
Mcm4	3.67381e-124	0.265724	0.298	0.066	6.86048e-120
Kpnb1	1.14721e-123	0.385463	0.688	0.266	2.14231e-119
Tagln2	1.20164e-123	0.72233	0.823	0.501	2.24394e-119
Meox1	2.34333e-123	0.348201	0.538	0.178	4.37594e-119
Arxes1	1.33417e-122	0.330781	0.216	0.038	2.49144e-118
Hspe1	1.93582e-122	0.936547	0.797	0.492	3.61495e-118
H2-Q6	4.69202e-122	0.321764	0.408	0.115	8.76187e-118
Lhfpl2	1.00765e-121	0.282432	0.35	0.088	1.88168e-117
Eif5a	1.38151e-121	0.811846	0.838	0.606	2.57983e-117
Ak2	1.04922e-120	0.537268	0.632	0.243	1.95932e-116
Fam96a	3.44489e-120	0.319337	0.615	0.224	6.43298e-116
Tpm4	1.03623e-119	0.68875	0.844	0.566	1.93506e-115
Cisd2	1.04368e-119	0.443126	0.75	0.334	1.94896e-115
Emilin1	2.3301e-119	0.399865	0.62	0.233	4.35122e-115
Cxcl10	6.32521e-119	1.04713	0.358	0.101	1.18117e-114
Snrpa1	1.21706e-118	0.347529	0.601	0.218	2.27273e-114
Hjurp	1.62711e-118	0.447696	0.507	0.167	3.03847e-114
Taf12	9.19928e-118	0.261827	0.56	0.189	1.71787e-113
Cs	2.18716e-117	0.376073	0.608	0.222	4.0843e-113
Gpx7	3.75516e-117	0.785575	0.739	0.391	7.01238e-113
Tuba1c	1.03068e-116	0.361427	0.329	0.084	1.9247e-112
Sac3d1	1.57214e-116	0.257775	0.387	0.107	2.93581e-112
Pgk1	1.98645e-116	0.609553	0.712	0.343	3.7095e-112
S1pr3	5.05157e-115	0.298131	0.419	0.123	9.43329e-111
Stip1	1.09082e-114	0.2827	0.552	0.189	2.037e-110
Tmem183a	1.18106e-114	0.257946	0.464	0.144	2.20551e-110
Tardbp	1.75106e-114	0.310108	0.626	0.232	3.26993e-110
E2f1	5.29295e-114	0.255986	0.253	0.054	9.88405e-110
Eny2	6.09547e-114	0.507775	0.786	0.402	1.13827e-109
Timm50	6.89371e-114	0.302481	0.498	0.164	1.28733e-109
Nans	1.26967e-113	0.292354	0.609	0.225	2.37097e-109
Psme3	2.45422e-113	0.276646	0.444	0.136	4.58301e-109
Dnmt1	3.82355e-113	0.273831	0.331	0.084	7.14009e-109
Hmgn1	4.84866e-113	0.613613	0.866	0.597	9.0544e-109
Dnajc15	5.75449e-113	0.298695	0.578	0.208	1.07459e-108
Hikeshi	9.55678e-113	0.39473	0.707	0.296	1.78463e-108
Vars	1.09221e-112	0.252416	0.458	0.142	2.0396e-108
Cyp1b1	2.21071e-112	0.528388	0.668	0.283	4.12828e-108
Eloc	4.81124e-112	0.499776	0.803	0.429	8.98451e-108
Mif	9.07744e-112	0.842694	0.721	0.396	1.69512e-107
Siva1	1.05474e-111	0.54705	0.657	0.29	1.96962e-107
Tmem167	1.36354e-111	0.566914	0.811	0.468	2.54627e-107
Cacybp	2.09122e-111	0.462871	0.724	0.327	3.90514e-107
Ost4	2.40982e-111	0.642697	0.842	0.538	4.5001e-107
Fzr1	3.11733e-111	0.318899	0.361	0.099	5.8213e-107
Ap3s1	3.81424e-111	0.533061	0.774	0.394	7.1227e-107
Ckap5	5.96503e-111	0.332823	0.425	0.126	1.11391e-106
Snai1	1.00364e-110	0.269309	0.416	0.125	1.87421e-106
Rpl22l1	1.69498e-110	0.685649	0.895	0.729	3.16521e-106
Pgp	2.26913e-110	0.375338	0.649	0.259	4.23738e-106
Sf3b5	1.20662e-109	0.501374	0.805	0.435	2.25324e-105
Cdk2ap1	1.28573e-109	0.273599	0.411	0.123	2.40098e-105
Lmf2	2.05389e-109	0.256083	0.473	0.152	3.83543e-105
Anapc11	3.09343e-109	0.529388	0.789	0.437	5.77668e-105
Pole4	1.00076e-107	0.277433	0.621	0.238	1.86882e-103
Emc8	1.09617e-107	0.264463	0.571	0.208	2.04699e-103
2022-03-05	1.60804e-107	0.401212	0.708	0.312	3.00286e-103
Apex1	2.11908e-107	0.309275	0.476	0.16	3.95717e-103
Rnaseh2c	2.1823e-107	0.354492	0.707	0.306	4.07523e-103
Slirp	2.75281e-107	0.383138	0.697	0.312	5.14059e-103
Rbp4	5.75777e-107	0.561691	0.499	0.182	1.07521e-102
Cbx1	1.65394e-106	0.403083	0.772	0.359	3.08857e-102
Ybx1	1.69338e-106	0.528506	0.929	0.79	3.16222e-102
Cox7c	1.92998e-106	0.647869	0.876	0.602	3.60404e-102
Hmgn5	7.74987e-106	0.262561	0.425	0.13	1.44721e-101
Tmem107	1.00829e-105	0.297255	0.528	0.185	1.88288e-101
Rnps1	1.1587e-105	0.276404	0.563	0.205	2.16376e-101
Atp5g2	1.20144e-105	0.568541	0.848	0.562	2.24357e-101
Npm1	1.86044e-105	0.753294	0.895	0.687	3.47418e-101
2010107E04Rik	1.87113e-105	0.560161	0.789	0.423	3.49414e-101
Gapdh	2.52776e-105	0.569787	0.752	0.4	4.72033e-101
Rbm17	4.54605e-105	0.349028	0.671	0.277	8.4893e-101
Ap1s1	1.66396e-104	0.294053	0.654	0.263	3.10729e-100
Nsmce1	3.3507e-104	0.302611	0.633	0.25	6.2571e-100
Adam23	8.19096e-104	0.259529	0.511	0.176	1.52958e-99
Tomm40	1.1847e-103	0.330886	0.597	0.232	2.21231e-99
Mrps11	2.04557e-103	0.255819	0.485	0.162	3.8199e-99
Prelid1	3.11376e-103	0.51468	0.803	0.458	5.81464e-99
Eif1ax	2.19826e-102	0.402259	0.723	0.333	4.10503e-98
Cisd1	2.23102e-102	0.349047	0.648	0.265	4.16621e-98
Dazap1	3.91653e-102	0.301547	0.676	0.284	7.31373e-98
Mmp19	1.09504e-101	0.312405	0.513	0.182	2.04487e-97
Adamts4	1.4024e-101	0.294823	0.359	0.105	2.61885e-97
Mrpl57	1.64061e-101	0.364264	0.709	0.317	3.06368e-97
Sh3bgrl3	1.94352e-101	0.598513	0.811	0.517	3.62932e-97
Rps17	5.16273e-101	0.61463	0.903	0.777	9.64089e-97
Prkaca	1.83671e-100	0.287018	0.485	0.167	3.42987e-96
Cox8a	2.63492e-100	0.645688	0.891	0.688	4.92045e-96
Coq7	6.67342e-100	0.260645	0.443	0.145	1.24619e-95
Mbd3	1.63859e-99	0.380308	0.767	0.36	3.0599e-95
Ndufa4	3.61032e-99	0.596952	0.866	0.629	6.74191e-95
Rab13	4.58976e-98	0.317119	0.596	0.234	8.57092e-94
Golt1b	6.10137e-98	0.254401	0.507	0.179	1.13937e-93
Hspd1	7.14236e-98	0.862505	0.732	0.419	1.33376e-93
Idh2	7.44894e-98	0.414901	0.661	0.301	1.39102e-93
Ldha	1.50502e-97	0.784386	0.77	0.501	2.81047e-93
Ccl7	1.86659e-97	0.958744	0.487	0.195	3.48567e-93
Cebpa	4.34228e-97	0.370277	0.379	0.119	8.10877e-93
Naa38	7.10558e-97	0.305995	0.704	0.306	1.3269e-92
Cd44	7.26599e-97	0.293492	0.555	0.207	1.35685e-92
Eif2s1	1.6565e-96	0.34468	0.643	0.27	3.09335e-92
Mettl9	3.15093e-96	0.373824	0.697	0.321	5.88405e-92
Cfl1	3.68329e-96	0.525999	0.895	0.705	6.87818e-92
Arpp19	7.39797e-96	0.437373	0.779	0.409	1.3815e-91
Hsp90aa1	1.58192e-95	0.605448	0.899	0.7	2.95407e-91
Fam216a	1.64898e-95	0.258975	0.368	0.112	3.0793e-91
Uhrf2	2.38975e-95	0.393847	0.65	0.282	4.46262e-91
Ppp4c	4.49323e-95	0.282959	0.695	0.295	8.39065e-91
Cyb5b	6.59038e-95	0.254524	0.528	0.194	1.23069e-90
Lpl	1.5639e-94	0.671993	0.782	0.473	2.92042e-90
Gng5	4.46441e-94	0.513072	0.899	0.708	8.33685e-90
Mrpl28	6.65901e-94	0.283556	0.667	0.286	1.2435e-89
Ube2i	8.23143e-94	0.444521	0.794	0.439	1.53714e-89
Metap2	1.06325e-93	0.458149	0.784	0.423	1.98551e-89
Mlec	1.09336e-93	0.3787	0.733	0.348	2.04175e-89
Dynll2	1.22868e-93	0.304504	0.659	0.28	2.29443e-89
Nop58	1.23909e-93	0.39024	0.68	0.301	2.31387e-89
Yaf2	1.83513e-93	0.266073	0.526	0.197	3.42692e-89
Pfdn6	3.94447e-93	0.346115	0.696	0.319	7.36591e-89
Nnat	4.44734e-93	0.723901	0.248	0.062	8.30496e-89
Acp1	5.2784e-93	0.428981	0.778	0.397	9.85688e-89
Rpl31	1.24017e-92	0.607785	0.862	0.664	2.3159e-88
B4galt5	1.36201e-92	0.280475	0.353	0.108	2.54341e-88
Sec61b	2.92368e-92	0.565212	0.84	0.556	5.45968e-88
Rps2	4.65568e-92	0.644988	0.865	0.74	8.69402e-88
Emc6	1.14437e-91	0.26189	0.648	0.273	2.13699e-87
Pgam1	1.28828e-91	0.53397	0.774	0.434	2.40573e-87
Phf5a	1.84864e-91	0.287815	0.633	0.268	3.45215e-87
Atp5g1	1.88943e-91	0.552287	0.843	0.564	3.52833e-87
Tma7	2.04403e-91	0.498347	0.826	0.533	3.81702e-87
Coa6	3.89739e-91	0.260165	0.484	0.173	7.27799e-87
Sem1	4.57778e-91	0.505823	0.893	0.671	8.54855e-87
Atp5o.1	4.64386e-91	0.622361	0.801	0.496	8.67194e-87
Rpl39	5.50964e-91	0.568087	0.899	0.769	1.02887e-86
Rpl15	7.57531e-91	0.521138	0.902	0.804	1.41461e-86
Map2k3	7.72701e-91	0.274393	0.584	0.234	1.44294e-86
Psmd14	2.12537e-90	0.315399	0.609	0.25	3.96892e-86
Tceal9	3.06009e-90	0.610474	0.789	0.53	5.71442e-86
Mrps16	3.61421e-90	0.387452	0.723	0.352	6.74917e-86
Naa20	3.99055e-90	0.310144	0.694	0.312	7.45196e-86
Serpinh1	4.51246e-90	0.647448	0.854	0.681	8.42657e-86
Tomm70a	4.79789e-90	0.263965	0.531	0.201	8.95958e-86
Tmem119	5.91924e-90	0.349381	0.567	0.231	1.10536e-85
Pin1	7.07168e-90	0.269147	0.684	0.299	1.32057e-85
Manf	1.59725e-89	0.510674	0.778	0.452	2.9827e-85
Cthrc1	1.83958e-89	0.391023	0.398	0.136	3.43524e-85
Ubald2	2.63874e-89	0.356887	0.597	0.256	4.92758e-85
Vps36	8.17742e-89	0.266018	0.673	0.292	1.52705e-84
Serbp1	8.42138e-89	0.568132	0.838	0.569	1.57261e-84
Ssbp1	2.12857e-88	0.25921	0.609	0.252	3.97489e-84
Ndufa2	2.20197e-88	0.476058	0.853	0.559	4.11196e-84
Bet1	2.54921e-88	0.258949	0.616	0.256	4.7604e-84
Hnrnpa2b1	2.58604e-88	0.499588	0.916	0.672	4.82917e-84
2022-09-10	5.31587e-88	0.296897	0.381	0.122	9.92686e-84
Idh3a	1.05032e-87	0.544611	0.521	0.207	1.96138e-83
Bex3	1.3755e-87	0.267367	0.608	0.252	2.56861e-83
Hist1h1e	2.30247e-87	0.393085	0.255	0.066	4.29963e-83
Ywhah	6.18163e-87	0.442187	0.773	0.425	1.15436e-82
Hmgn3	6.70939e-87	0.312843	0.63	0.273	1.25291e-82
Serf2	7.07129e-87	0.564895	0.899	0.762	1.32049e-82
Ube2m	8.62903e-87	0.330152	0.696	0.319	1.61139e-82
Cmpk1	1.03988e-86	0.323142	0.724	0.343	1.94188e-82
Mrps15	1.07065e-86	0.280695	0.631	0.272	1.99933e-82
Elob	2.2964e-86	0.500465	0.871	0.668	4.2883e-82
Srsf7	3.79662e-86	0.45684	0.684	0.351	7.08981e-82
Rplp2	1.10727e-85	0.552848	0.899	0.742	2.06772e-81
Vdac1	2.52179e-85	0.402332	0.709	0.348	4.7092e-81
Hdac2	3.46485e-85	0.255093	0.627	0.265	6.47025e-81
Nolc1	3.73587e-85	0.269188	0.498	0.189	6.97636e-81
G3bp1	4.6198e-85	0.377755	0.758	0.401	8.62701e-81
Gtf2a2	7.42511e-85	0.349481	0.709	0.345	1.38656e-80
Tmsb10	1.89047e-84	0.673756	0.843	0.711	3.53026e-80
Cbx3	2.5726e-84	0.572198	0.676	0.351	4.80408e-80
Ndufb8	2.66801e-84	0.473151	0.799	0.463	4.98225e-80
Tmem120a	3.61962e-84	0.288597	0.409	0.141	6.75927e-80
Plod1	4.85785e-84	0.277653	0.653	0.282	9.07154e-80
Mrpl17	5.34185e-84	0.368442	0.706	0.352	9.97537e-80
Elavl1	2.92035e-83	0.263013	0.628	0.268	5.45346e-79
Nudc	3.31842e-83	0.40561	0.766	0.411	6.19682e-79
Bola2	3.44161e-83	0.272324	0.616	0.27	6.42687e-79
Tmem126a	5.44715e-83	0.270298	0.638	0.275	1.0172e-78
Ndufc1	5.9277e-83	0.505242	0.762	0.428	1.10694e-78
Cox5a	6.33395e-83	0.63341	0.766	0.448	1.1828e-78
Bub3	9.48799e-83	0.450163	0.639	0.298	1.77179e-78
Snrpd2	9.55244e-83	0.445094	0.809	0.505	1.78382e-78
Rbbp7	2.04823e-82	0.410011	0.738	0.385	3.82486e-78
Mrpl33	2.4908e-82	0.450238	0.805	0.487	4.65132e-78
Trp53	3.41331e-82	0.299528	0.65	0.285	6.37402e-78
Cnih4	3.80289e-82	0.36604	0.701	0.35	7.10151e-78
Cenpx	1.05298e-81	0.299857	0.698	0.338	1.96634e-77
Oaz1	1.20039e-81	0.455438	0.92	0.814	2.2416e-77
Dcun1d5	1.40244e-81	0.332987	0.689	0.331	2.61891e-77
Dnajc19	2.13975e-81	0.3116	0.735	0.365	3.99576e-77
U2af1	4.00615e-81	0.40427	0.759	0.417	7.48108e-77
Timm13	5.55381e-81	0.490387	0.796	0.492	1.03712e-76
Swi5	7.60748e-81	0.499676	0.867	0.623	1.42062e-76
Saa3	9.26265e-81	0.989418	0.234	0.063	1.72971e-76
Uqcr10	9.28443e-81	0.5582	0.8	0.483	1.73377e-76
Glrx5	1.67169e-80	0.330682	0.697	0.329	3.12171e-76
Mrps17	6.61146e-80	0.29522	0.672	0.314	1.23462e-75
Eif4ebp1	1.07588e-79	0.439219	0.718	0.383	2.0091e-75
Raly	1.11742e-79	0.363316	0.753	0.398	2.08666e-75
Higd1a	1.25132e-79	0.378294	0.69	0.34	2.33671e-75
Ap2s1	1.30342e-79	0.363928	0.777	0.418	2.43401e-75
Snrpc	3.23661e-79	0.326408	0.719	0.354	6.04405e-75
Col15a1	4.72263e-79	0.435292	0.733	0.389	8.81904e-75
Morf4l2	5.95748e-79	0.519479	0.811	0.52	1.1125e-74
Rpl29	1.123e-78	0.54972	0.862	0.688	2.0971e-74
Hnrnpa3	1.43484e-78	0.415071	0.823	0.51	2.67942e-74
Tmem258	1.70129e-78	0.480283	0.753	0.423	3.17699e-74
Lmna	2.86459e-78	0.59319	0.799	0.538	5.34933e-74
Snx3	3.07399e-78	0.422879	0.821	0.521	5.74037e-74
Pa2g4	3.26204e-78	0.321929	0.66	0.307	6.09153e-74
Ssr2	5.54951e-78	0.48262	0.774	0.476	1.03632e-73
Timm10b	4.97301e-77	0.260718	0.641	0.297	9.2866e-73
Srp9	5.06301e-77	0.482417	0.817	0.519	9.45466e-73
Gadd45gip1	5.38108e-77	0.252414	0.628	0.278	1.00486e-72
Tmed2	6.60314e-77	0.477351	0.869	0.63	1.23307e-72
Sdhd	1.40221e-76	0.373275	0.679	0.332	2.61848e-72
Krtcap2	1.50514e-76	0.473828	0.866	0.645	2.8107e-72
Strap	1.74113e-76	0.298407	0.661	0.314	3.25138e-72
Stat1	5.16573e-76	0.268137	0.548	0.227	9.64648e-72
Ier3ip1	1.14155e-75	0.358519	0.743	0.395	2.13172e-71
Psmc1	1.18469e-75	0.255493	0.591	0.255	2.21228e-71
Lgmn	3.35515e-75	0.440207	0.618	0.299	6.26541e-71
Commd1	6.06997e-75	0.303877	0.694	0.342	1.13351e-70
Tcp1	1.61881e-74	0.43899	0.762	0.452	3.02297e-70
Srm	2.01875e-74	0.438257	0.631	0.32	3.76982e-70
1810022K09Rik	4.51693e-74	0.286373	0.642	0.295	8.43492e-70
Slbp	4.57052e-74	0.307363	0.563	0.248	8.53499e-70
Prmt1	8.31904e-74	0.316885	0.65	0.316	1.5535e-69
Ssr1	8.92123e-74	0.335666	0.73	0.379	1.66595e-69
Cnih1	1.00148e-73	0.276443	0.732	0.36	1.87015e-69
Rpl32	3.13759e-73	0.476245	0.918	0.852	5.85914e-69
Snrpd3	1.71007e-72	0.342054	0.695	0.357	3.19339e-68
Rpl13a	3.50794e-72	0.509786	0.806	0.55	6.55073e-68
Col4a1	6.52375e-72	0.551773	0.76	0.492	1.21824e-67
Rpl36al	1.0118e-71	0.277682	0.655	0.322	1.88944e-67
Mrps36	4.23876e-71	0.26783	0.642	0.298	7.91546e-67
Mlf2	5.00447e-71	0.39248	0.731	0.413	9.34536e-67
Hnrnpc	7.70857e-71	0.387092	0.76	0.441	1.4395e-66
Ppa1	9.09173e-71	0.272185	0.616	0.28	1.69779e-66
C1qbp	9.91456e-71	0.402668	0.653	0.322	1.85144e-66
P4hb	1.48927e-70	0.452105	0.808	0.546	2.78107e-66
Rps19	1.69344e-70	0.439936	0.942	0.861	3.16232e-66
Cotl1	2.40756e-70	0.261495	0.604	0.279	4.49588e-66
Eno1	2.49839e-70	0.405213	0.571	0.265	4.66549e-66
Cox6b1	6.22536e-70	0.506715	0.856	0.604	1.16252e-65
Thoc7	6.56365e-70	0.253278	0.727	0.36	1.2257e-65
Ube2n	8.53685e-70	0.299622	0.719	0.379	1.59417e-65
Rplp0	8.69985e-70	0.489135	0.899	0.825	1.62461e-65
Fkbp10	4.43723e-69	0.286891	0.647	0.306	8.28608e-65
Ppp1cc	8.2045e-69	0.318205	0.75	0.405	1.53211e-64
Calm3	9.58609e-69	0.454555	0.8	0.498	1.79011e-64
Lsm7	1.12247e-68	0.301567	0.66	0.323	2.09611e-64
Mdh2	1.40551e-68	0.500096	0.776	0.486	2.62464e-64
Psmb2	2.21435e-68	0.429331	0.796	0.515	4.13507e-64
Rpl23a	2.37746e-68	0.470463	0.91	0.819	4.43967e-64
Atp5k	2.60009e-68	0.273689	0.601	0.285	4.85541e-64
Usmg5	3.69233e-68	0.408616	0.674	0.367	6.89506e-64
Mt2	3.93617e-68	0.82685	0.556	0.294	7.3504e-64
Rplp1	6.12398e-68	0.490171	0.887	0.777	1.14359e-63
H2-T22	1.05373e-67	0.405718	0.723	0.395	1.96774e-63
Cbx5	1.08057e-67	0.263907	0.565	0.254	2.01786e-63
Tmem176a	1.12541e-67	0.392844	0.607	0.303	2.10159e-63
Cxcl14	1.18161e-67	0.373147	0.472	0.205	2.20653e-63
Psma4	1.7249e-67	0.429202	0.786	0.512	3.22107e-63
Nop10	3.26264e-67	0.485551	0.729	0.436	6.09266e-63
Cyc1	1.07427e-66	0.49934	0.68	0.368	2.00609e-62
Atp5l	2.16907e-66	0.475777	0.884	0.656	4.05052e-62
Mrpl12	2.65578e-66	0.444888	0.618	0.312	4.95941e-62
Cox14	2.76393e-66	0.41272	0.745	0.43	5.16137e-62
Arl6ip1	3.33263e-66	0.936117	0.786	0.503	6.22336e-62
Col18a1	3.41003e-66	0.256017	0.578	0.26	6.36788e-62
Atpif1	4.26244e-66	0.438246	0.828	0.545	7.95968e-62
Ndufab1	5.82201e-66	0.504226	0.762	0.467	1.0872e-61
Emp1	6.58104e-66	0.498681	0.735	0.474	1.22894e-61
Minos1	9.38416e-66	0.449774	0.817	0.539	1.7524e-61
Stub1	1.3317e-65	0.37574	0.773	0.467	2.48682e-61
Fkbp2	1.46545e-65	0.35807	0.786	0.465	2.73658e-61
Syncrip	3.17406e-65	0.28738	0.7	0.346	5.92724e-61
Nop56	5.48972e-65	0.25733	0.545	0.244	1.02515e-60
Enpp2	7.94983e-65	0.268281	0.6	0.278	1.48455e-60
Sod2	8.67745e-65	0.839023	0.601	0.341	1.62043e-60
Mtpn	8.79804e-65	0.277178	0.695	0.353	1.64295e-60
Mrpl14	1.14992e-64	0.346343	0.701	0.38	2.14735e-60
Tmem176b	1.1535e-64	0.373483	0.663	0.343	2.15405e-60
Atp5j	1.53813e-64	0.398326	0.885	0.684	2.8723e-60
Serp1	2.42272e-64	0.349214	0.738	0.412	4.52418e-60
Fkbp3	3.5428e-64	0.333289	0.678	0.36	6.61582e-60
Mtch2	3.81822e-64	0.315486	0.697	0.361	7.13014e-60
Cwc15	4.14618e-64	0.267762	0.718	0.382	7.74258e-60
Rpl35	6.34466e-64	0.425602	0.82	0.539	1.1848e-59
Cstb	6.63567e-64	0.482946	0.729	0.46	1.23914e-59
Ndufs5	7.79609e-64	0.382254	0.806	0.522	1.45584e-59
Zfp706	3.04791e-63	0.287885	0.745	0.421	5.69168e-59
Pabpc1	8.6746e-63	0.402541	0.882	0.676	1.61989e-58
Cox6c	1.49503e-62	0.439604	0.859	0.638	2.79182e-58
Ppp1ca	1.81087e-62	0.406503	0.814	0.573	3.38162e-58
Scarb2	1.81778e-62	0.269589	0.648	0.328	3.39452e-58
Tubb4b	2.05789e-62	0.596392	0.706	0.444	3.84291e-58
Cox6a1	2.45472e-62	0.388078	0.835	0.593	4.58395e-58
Sumo2	2.55829e-62	0.425279	0.867	0.683	4.77736e-58
Npc2	2.59502e-62	0.520631	0.82	0.619	4.84594e-58
Rbm8a	2.68162e-62	0.262063	0.69	0.357	5.00766e-58
Erp29	5.13071e-62	0.41692	0.76	0.495	9.58109e-58
Pcbp2	5.65303e-62	0.372123	0.869	0.636	1.05565e-57
Mrpl52	1.15117e-61	0.375174	0.747	0.46	2.14969e-57
Rpl24	1.70525e-61	0.397757	0.916	0.832	3.18438e-57
Txn1	1.80599e-61	0.470875	0.861	0.677	3.37251e-57
Fam104a	8.20074e-61	0.289105	0.72	0.388	1.53141e-56
Rwdd1	1.31978e-60	0.295993	0.78	0.458	2.46456e-56
Mrps14	1.71743e-60	0.301992	0.76	0.442	3.20713e-56
Mrfap1	3.43743e-60	0.379385	0.864	0.644	6.41906e-56
Chchd1	4.63576e-60	0.311833	0.701	0.385	8.65682e-56
Mrpl54	1.09116e-59	0.255076	0.702	0.372	2.03763e-55
Rtp4	1.89353e-59	0.282533	0.531	0.253	3.53597e-55
Cald1	2.21743e-59	0.483361	0.824	0.683	4.14082e-55
Col4a2	3.67166e-59	0.404197	0.75	0.468	6.85645e-55
Tomm20	3.84829e-59	0.467827	0.754	0.482	7.18631e-55
Ap2m1	5.47422e-59	0.322957	0.777	0.484	1.02226e-54
Gnl3	7.21481e-59	0.260424	0.562	0.264	1.34729e-54
Bst2	7.34358e-59	0.563273	0.726	0.467	1.37134e-54
Dclk1	8.16707e-59	0.25719	0.639	0.321	1.52512e-54
Impdh2	1.96753e-58	0.292524	0.669	0.361	3.67417e-54
Rps6	3.92641e-58	0.379885	0.919	0.86	7.33218e-54
Atp5j2	5.19826e-58	0.412545	0.836	0.579	9.70724e-54
Anapc13	2.64572e-57	0.268154	0.672	0.355	4.94062e-53
Ifi27	3.64376e-57	0.513163	0.75	0.527	6.80435e-53
Gpx4	5.36853e-57	0.410458	0.861	0.696	1.00252e-52
Ptges3	7.84885e-57	0.253394	0.744	0.41	1.4657e-52
Atp5g3	1.02361e-56	0.358156	0.767	0.483	1.91149e-52
Eef1g	1.22664e-56	0.471761	0.841	0.692	2.29063e-52
Fam162a	1.5097e-56	0.262086	0.704	0.393	2.81921e-52
Cox5b	2.10309e-56	0.419456	0.771	0.489	3.92732e-52
Psmb7	3.22644e-56	0.313813	0.663	0.368	6.02506e-52
Tbca	3.4905e-56	0.301367	0.824	0.533	6.51816e-52
Eif2s2	3.70892e-56	0.391752	0.789	0.502	6.92603e-52
Dynll1	5.63207e-56	0.636874	0.852	0.731	1.05173e-51
Spcs1	7.4794e-56	0.375833	0.805	0.554	1.3967e-51
Jpt1	1.31975e-55	0.457188	0.803	0.53	2.46449e-51
Rps26	7.48692e-55	0.440744	0.881	0.748	1.39811e-50
Eif6	2.11933e-54	0.304822	0.668	0.378	3.95763e-50
Mrpl20	2.28694e-54	0.29461	0.7	0.4	4.27064e-50
Cdc26	3.06013e-54	0.250138	0.686	0.369	5.7145e-50
Mcrip2	3.68498e-54	0.329306	0.27	0.096	6.88133e-50
Edf1	4.10387e-54	0.400274	0.82	0.589	7.66357e-50
Ndufa12	8.9029e-54	0.334105	0.688	0.399	1.66253e-49
1110008F13Rik	9.89476e-54	0.313722	0.715	0.41	1.84775e-49
Atp5e	1.09143e-53	0.353756	0.847	0.622	2.03813e-49
Psmd7	1.56529e-53	0.343954	0.77	0.492	2.92302e-49
Phb2	1.90732e-53	0.400119	0.698	0.418	3.56172e-49
Rps15a	2.33373e-53	0.373443	0.912	0.849	4.35802e-49
Lgals3bp	2.70391e-53	0.315554	0.695	0.401	5.04928e-49
Chchd2	5.102e-53	0.506625	0.862	0.722	9.52748e-49
Mrpl30	7.20213e-53	0.281853	0.724	0.417	1.34493e-48
Ndufb6	7.89196e-53	0.353007	0.714	0.413	1.47374e-48
Ndufa5	1.5854e-52	0.330052	0.692	0.412	2.96057e-48
Calm2	3.22575e-52	0.670404	0.811	0.648	6.02376e-48
Atp5f1	5.53854e-52	0.466614	0.808	0.601	1.03427e-47
Cdv3	5.59688e-52	0.280797	0.684	0.371	1.04516e-47
Ryk	7.46956e-52	0.281394	0.682	0.377	1.39487e-47
Nrep	9.43295e-52	0.30314	0.355	0.145	1.76151e-47
Rbm3	1.00088e-51	0.37551	0.852	0.625	1.86905e-47
Smc1a	1.45857e-51	0.262856	0.755	0.419	2.72373e-47
Psma3	1.94493e-51	0.388432	0.823	0.603	3.63196e-47
Rexo2	2.4077e-51	0.338681	0.786	0.524	4.49614e-47
Snu13	4.04501e-51	0.297652	0.764	0.478	7.55365e-47
Sdhb	4.9505e-51	0.300034	0.738	0.436	9.24456e-47
Surf4	7.17008e-51	0.265082	0.715	0.41	1.33894e-46
Ube2l3	9.76687e-51	0.264471	0.706	0.405	1.82386e-46
Nnmt	1.02467e-50	0.270839	0.589	0.301	1.91346e-46
Rps18	2.11645e-50	0.430533	0.872	0.793	3.95225e-46
Mydgf	2.44429e-50	0.280194	0.731	0.445	4.56447e-46
Snrpb	3.46477e-50	0.32614	0.818	0.579	6.47011e-46
Txn2	5.14003e-50	0.320227	0.663	0.384	9.59849e-46
Anapc5	5.97335e-50	0.26325	0.725	0.423	1.11546e-45
Angptl4	9.49896e-50	0.470717	0.626	0.386	1.77384e-45
Rpl37	1.58211e-49	0.375459	0.894	0.792	2.95442e-45
Nedd8	1.63331e-49	0.331624	0.8	0.55	3.05004e-45
Plin2	3.23315e-49	0.341943	0.624	0.357	6.03758e-45
Tmem256	5.89211e-49	0.305146	0.725	0.442	1.10029e-44
Thbs1	7.04263e-49	0.372008	0.434	0.208	1.31514e-44
H1f0	1.6624e-48	0.530491	0.65	0.379	3.10436e-44
Bax	2.03651e-48	0.271852	0.732	0.431	3.80298e-44
Rer1	4.73248e-48	0.319023	0.797	0.545	8.83743e-44
Rps27a	6.48305e-48	0.352881	0.918	0.848	1.21065e-43
Rpl37a	1.24134e-47	0.359347	0.902	0.812	2.31808e-43
1810037I17Rik	2.83082e-47	0.384918	0.762	0.516	5.28627e-43
Gtf2h5	8.0449e-47	0.260612	0.758	0.458	1.5023e-42
Pomp	1.58293e-46	0.299333	0.8	0.537	2.95596e-42
Ywhae	2.22865e-46	0.311013	0.843	0.619	4.16178e-42
Tomm22	3.23305e-46	0.29271	0.692	0.422	6.0374e-42
Isg15	7.17161e-46	0.494537	0.522	0.284	1.33923e-41
Uqcrb	8.14798e-46	0.391432	0.814	0.587	1.52155e-41
Rpl36a	8.27972e-46	0.320583	0.817	0.578	1.54616e-41
Ssr4	8.87895e-46	0.356608	0.795	0.575	1.65805e-41
Rps25	1.24635e-45	0.375625	0.878	0.804	2.32744e-41
Srsf6	1.27506e-45	0.270756	0.685	0.398	2.38105e-41
Hsp90b1	3.80133e-45	0.349178	0.906	0.751	7.0986e-41
Reep5	6.73453e-45	0.330598	0.84	0.612	1.25761e-40
Tomm5	8.2368e-45	0.362086	0.717	0.455	1.53814e-40
Vkorc1	1.14591e-44	0.324762	0.737	0.483	2.13988e-40
Tpi1	1.70694e-44	0.376417	0.706	0.444	3.18753e-40
Pcbp1	1.79158e-44	0.297951	0.786	0.541	3.3456e-40
Rbx1	2.44039e-44	0.308166	0.814	0.578	4.55718e-40
Hnrnpf	2.48102e-44	0.336621	0.805	0.583	4.63305e-40
Cox7b	3.44268e-44	0.394193	0.754	0.508	6.42886e-40
Uqcrfs1	4.28074e-44	0.340987	0.682	0.4	7.99385e-40
Smc6	4.29806e-44	0.252196	0.767	0.477	8.0262e-40
Lman1	7.024e-44	0.283976	0.743	0.466	1.31166e-39
Cct7	1.20436e-43	0.27662	0.714	0.421	2.24903e-39
D8Ertd738e	1.77766e-43	0.260976	0.826	0.584	3.3196e-39
Atp5b	3.75162e-43	0.523429	0.813	0.638	7.00578e-39
Rps28	5.30489e-43	0.371938	0.873	0.722	9.90635e-39
Ndufb5	6.9662e-43	0.361482	0.777	0.529	1.30087e-38
Polr1d	8.84186e-43	0.307355	0.761	0.516	1.65113e-38
Psma5	2.16461e-42	0.258458	0.724	0.452	4.04219e-38
Ostc	2.85847e-42	0.3296	0.788	0.558	5.33791e-38
Rtraf	5.26603e-42	0.296424	0.806	0.566	9.83379e-38
Ndufs6	9.39595e-42	0.259155	0.735	0.463	1.7546e-37
Rpl14	1.13932e-41	0.352438	0.895	0.815	2.12756e-37
Kdelr3	1.75076e-41	0.254881	0.643	0.372	3.26937e-37
Rps16	2.56706e-41	0.281643	0.926	0.875	4.79372e-37
Pdcd5	3.19553e-41	0.265665	0.731	0.469	5.96733e-37
Ndufv2	1.1439e-40	0.251907	0.701	0.423	2.13611e-36
Ncl	1.33581e-40	0.366332	0.807	0.591	2.49449e-36
Hsp90ab1	1.38269e-40	0.314653	0.929	0.879	2.58204e-36
Hspa9	1.40002e-40	0.374507	0.586	0.346	2.61439e-36
Mt1	4.57012e-40	0.710305	0.604	0.425	8.53424e-36
Kdelr2	7.37454e-40	0.444616	0.634	0.409	1.37712e-35
Col6a3	1.79122e-39	0.359629	0.754	0.53	3.34492e-35
Rps29	1.99229e-39	0.276679	0.891	0.777	3.7204e-35
Rpl6	2.22064e-39	0.316056	0.899	0.829	4.14682e-35
Rpl11	2.37461e-39	0.32985	0.882	0.79	4.43435e-35
Rpl10a	2.48681e-39	0.373076	0.866	0.776	4.64386e-35
Ppic	8.25969e-39	0.284127	0.766	0.516	1.54242e-34
Rpsa	4.45763e-38	0.297561	0.91	0.799	8.32417e-34
Hnrnpu	2.24683e-37	0.276332	0.828	0.598	4.19574e-33
Prdx1	1.73451e-36	0.444662	0.817	0.677	3.23902e-32
Arpc1b	1.03894e-35	0.320289	0.814	0.693	1.94012e-31
Loxl1	1.36856e-35	0.315461	0.759	0.545	2.55565e-31
Psma7	1.74012e-35	0.287638	0.789	0.606	3.2495e-31
Ssb	1.85569e-35	0.298128	0.782	0.546	3.46531e-31
Tspo	1.55083e-34	0.284568	0.835	0.651	2.89601e-30
Etfb	1.6115e-34	0.393152	0.683	0.47	3.00932e-30
Clic1	1.89788e-34	0.378508	0.791	0.615	3.54411e-30
Iigp1	2.60586e-34	0.300687	0.491	0.279	4.86619e-30
Rps7	3.59368e-34	0.270939	0.901	0.819	6.71084e-30
Rps23	1.85653e-33	0.285909	0.918	0.885	3.46688e-29
Uqcr11	3.61925e-33	0.368345	0.713	0.474	6.75858e-29
Ndufc2	5.94363e-33	0.279716	0.73	0.5	1.10991e-28
Rps11	1.92014e-32	0.254374	0.917	0.86	3.58567e-28
Rpl34	2.15738e-32	0.281528	0.895	0.839	4.02869e-28
H3f3a	8.45581e-32	0.278443	0.893	0.755	1.57904e-27
Ptms	1.1749e-31	0.322888	0.796	0.627	2.194e-27
Gm26917	2.56493e-31	0.358667	0.502	0.266	4.78976e-27
Tmed9	4.42587e-31	0.276739	0.803	0.622	8.26487e-27
Rps8	6.3929e-30	0.286514	0.875	0.818	1.19381e-25
Cavin3	9.01857e-30	0.277142	0.821	0.659	1.68413e-25
Rsad2	9.24374e-30	0.350257	0.226	0.098	1.72618e-25
Calr	9.93662e-30	0.312303	0.818	0.675	1.85556e-25
Tuba1a	2.39835e-29	0.385895	0.778	0.695	4.47868e-25
Col6a1	4.39248e-29	0.319246	0.786	0.612	8.20251e-25
Srsf3	1.13864e-28	0.264501	0.786	0.583	2.1263e-24
Rpl36	2.75992e-27	0.299348	0.849	0.768	5.15388e-23
Ftl1	8.11454e-27	0.331322	0.873	0.8	1.51531e-22
Rrbp1	3.30259e-26	0.303954	0.844	0.725	6.16725e-22
Eif4a1	7.5988e-25	0.383623	0.752	0.613	1.419e-20
Anxa2	1.77766e-24	0.330061	0.774	0.669	3.3196e-20
B2m	7.0784e-22	0.255868	0.838	0.759	1.32182e-17
Vim	5.56323e-21	0.266891	0.912	0.797	1.03888e-16
Fabp5	6.49282e-21	0.862498	0.332	0.198	1.21247e-16
Cebpb	1.22502e-20	0.302694	0.639	0.462	2.2876e-16
Dbi	1.81883e-19	0.26422	0.685	0.523	3.39648e-15
Ifitm3	1.58292e-18	0.298846	0.79	0.745	2.95594e-14
Actg1	1.73419e-17	0.290234	0.852	0.76	3.23842e-13
Cd63	7.51162e-16	0.284823	0.767	0.689	1.40272e-11
Slc39a1	0.000306063	0.343937	0.24	0.195	1
G0s2	0.00380636	0.342665	0.311	0.266	1

## Sheet: VEC
	p_val	avg_logFC	pct.1	pct.2	p_val_adj
Fabp4	0	3.10931	0.917	0.216	0
Cd36	0	2.78704	0.84	0.157	0
Gpihbp1	0	2.70265	0.63	0.044	0
Cldn5	0	2.69116	0.676	0.045	0
Egfl7	0	2.56221	0.853	0.069	0
Ptprb	0	2.47899	0.745	0.049	0
Rbp7	0	2.45257	0.509	0.053	0
Tm4sf1	0	2.43616	0.855	0.306	0
Flt1	0	2.40338	0.734	0.044	0
Cavin2	0	2.39175	0.898	0.261	0
Aqp1	0	2.34875	0.377	0.038	0
Id1	0	2.33697	0.763	0.151	0
Pecam1	0	2.33627	0.804	0.077	0
Cdh5	0	2.2431	0.747	0.036	0
8430408G22Rik	0	2.09109	0.488	0.032	0
Lrg1	0	2.08529	0.255	0.037	0
Cd300lg	0	2.02061	0.594	0.054	0
Stmn2	0	2.0168	0.494	0.035	0
Slc6a6	0	1.98813	0.599	0.172	0
Slc9a3r2	0	1.94415	0.724	0.233	0
Esam	0	1.93452	0.706	0.06	0
Adgrf5	0	1.9263	0.689	0.062	0
Kdr	0	1.91162	0.555	0.021	0
Cav1	0	1.88412	0.832	0.319	0
Sox18	0	1.87882	0.486	0.032	0
Mgll	0	1.8787	0.76	0.268	0
Emcn	0	1.87487	0.549	0.023	0
Sox17	0	1.87484	0.482	0.024	0
Vwf	0	1.83357	0.247	0.019	0
Btnl9	0	1.82971	0.451	0.017	0
Icam2	0	1.80887	0.581	0.034	0
mt-Atp6	0	1.77461	0.445	0.09	0
Fabp5	0	1.76208	0.607	0.165	0
Cyyr1	0	1.75384	0.565	0.02	0
Eng	0	1.75104	0.691	0.276	0
Tinagl1	0	1.73085	0.618	0.086	0
S1pr1	0	1.70612	0.571	0.028	0
Epas1	0	1.69497	0.652	0.14	0
mt-Co2	0	1.69424	0.438	0.102	0
Podxl	0	1.69002	0.541	0.034	0
Ecscr	0	1.68455	0.634	0.129	0
Cd93	0	1.66645	0.554	0.025	0
Tcf15	0	1.65726	0.507	0.043	0
Rflnb	0	1.64512	0.461	0.064	0
Klf2	0	1.64297	0.883	0.506	0
Adgrl4	0	1.63341	0.53	0.017	0
Tspan13	0	1.63336	0.618	0.082	0
Cav2	0	1.63163	0.608	0.112	0
Mmrn2	0	1.62722	0.543	0.032	0
Apold1	0	1.59432	0.466	0.035	0
Rasip1	0	1.58661	0.541	0.017	0
Sgk1	0	1.57972	0.602	0.248	0
Rgcc	0	1.56294	0.526	0.144	0
Tcim	0	1.49023	0.404	0.04	0
Tspan7	0	1.46301	0.523	0.082	0
Ushbp1	0	1.45978	0.48	0.018	0
Jam2	0	1.44633	0.573	0.145	0
Srgn	0	1.44486	0.709	0.157	0
mt-Nd4	0	1.41245	0.511	0.144	0
Hspb1	0	1.40192	0.755	0.314	0
Aplp2	0	1.38872	0.837	0.576	0
C1qtnf9	0	1.3787	0.406	0.015	0
Sema3g	0	1.37575	0.346	0.02	0
Myct1	0	1.36243	0.452	0.017	0
Arhgap31	0	1.35183	0.544	0.14	0
Kitl	0	1.33297	0.604	0.22	0
Kank3	0	1.31589	0.43	0.043	0
Tgm2	0	1.27434	0.496	0.149	0
Clec14a	0	1.27214	0.422	0.068	0
Ctla2a	0	1.26721	0.443	0.071	0
Prex2	0	1.26383	0.523	0.107	0
Tie1	0	1.25137	0.406	0.013	0
Palmd	0	1.24776	0.39	0.014	0
Gja4	0	1.22399	0.324	0.045	0
Aqp7	0	1.2041	0.298	0.015	0
Grrp1	0	1.17761	0.322	0.01	0
Itpkb	0	1.17501	0.48	0.121	0
Timp4	0	1.16852	0.274	0.037	0
Gimap6	0	1.16836	0.471	0.072	0
Itga6	0	1.13226	0.394	0.051	0
Bcam	0	1.12711	0.459	0.085	0
Mecom	0	1.12287	0.321	0.031	0
Pdgfb	0	1.12184	0.344	0.025	0
Ptprr	0	1.11434	0.274	0.012	0
Clic5	0	1.0677	0.322	0.017	0
She	0	1.06549	0.342	0.015	0
Adgrg1	0	1.06364	0.338	0.024	0
Arhgef15	0	1.06347	0.332	0.01	0
Fli1	0	1.04572	0.367	0.045	0
Thrsp	0	1.00327	0.247	0.019	0
Fgd5	0	0.990779	0.32	0.031	0
Efnb2	0	0.989566	0.309	0.03	0
Chp2	0	0.979592	0.243	0.01	0
Rapgef5	0	0.972434	0.319	0.028	0
Tm6sf1	0	0.969461	0.309	0.025	0
Pkp4	0	0.964659	0.326	0.049	0
Gata2	0	0.959377	0.293	0.014	0
Unc45b	0	0.956775	0.35	0.054	0
Adcy4	0	0.952531	0.31	0.033	0
Sema6a	0	0.949131	0.319	0.051	0
Clec1a	0	0.941732	0.346	0.066	0
Cracr2b	0	0.933939	0.338	0.047	0
Nebl	0	0.907524	0.216	0.017	0
Afap1l1	0	0.904088	0.284	0.015	0
Jag2	0	0.882822	0.251	0.014	0
Tmsb4x	0	0.882146	0.94	0.681	0
Rassf9	0	0.877964	0.262	0.024	0
Lmo7	0	0.873586	0.296	0.044	0
Efna1	0	0.869794	0.284	0.045	0
Fam181b	0	0.864966	0.248	0.013	0
Etl4	0	0.846085	0.278	0.044	0
Rasgrp3	0	0.845101	0.252	0.008	0
Ggta1	0	0.836119	0.293	0.029	0
Eva1a	0	0.812689	0.231	0.009	0
Tnfsf10	0	0.812544	0.246	0.019	0
Ablim3	0	0.807382	0.234	0.012	0
Gimap1	0	0.79478	0.309	0.031	0
Gimap4	0	0.783529	0.312	0.03	0
Robo4	0	0.771585	0.229	0.006	0
Csf2rb	0	0.769817	0.201	0.012	0
Gbp4	0	0.768518	0.235	0.025	0
Lmcd1	0	0.76337	0.242	0.023	0
Dll4	0	0.750747	0.21	0.008	0
Hhex	0	0.73718	0.21	0.014	0
Pcdh17	0	0.714032	0.21	0.008	0
Prkch	0	0.710634	0.226	0.016	0
Arap3	0	0.692916	0.226	0.014	0
Parvb	0	0.651813	0.205	0.014	0
Ceacam1	0	0.643619	0.204	0.019	0
Gng11	1.07136e-307	1.43616	0.724	0.417	2.00067e-303
C130074G19Rik	1.09034e-307	0.655076	0.204	0.021	2.03611e-303
Cdh13	1.2711e-304	1.00328	0.382	0.089	2.37365e-300
Calm1	1.46905e-296	0.912522	0.91	0.802	2.7433e-292
mt-Nd2	1.67404e-292	1.51018	0.371	0.082	3.1261e-288
Crip2	9.02679e-290	1.08185	0.795	0.517	1.68566e-285
Fnbp1l	3.57107e-286	0.841198	0.315	0.063	6.66861e-282
Hspa12b	5.28167e-286	0.853342	0.289	0.052	9.86299e-282
Pim3	2.263e-284	1.24687	0.487	0.167	4.22592e-280
mt-Cytb	6.84768e-284	1.49763	0.432	0.115	1.27874e-279
Smagp	7.8809e-284	0.834901	0.276	0.047	1.47168e-279
Itga1	1.25728e-281	0.976248	0.449	0.129	2.34784e-277
Cbfa2t3	5.49791e-281	0.869611	0.337	0.072	1.02668e-276
F11r	2.66796e-276	0.700509	0.234	0.034	4.98215e-272
Lims2	7.83007e-267	1.17441	0.552	0.224	1.46219e-262
Gfod1	1.02213e-266	0.642818	0.203	0.025	1.90873e-262
Tmem88	1.38572e-262	0.968313	0.372	0.099	2.5877e-258
Ly6c1	4.75215e-259	1.16529	0.785	0.433	8.87417e-255
Plk2	6.55482e-259	1.133	0.459	0.151	1.22405e-254
Ccdc88c	2.41622e-258	0.639684	0.223	0.032	4.51206e-254
Sncg	4.6104e-257	0.529939	0.354	0.08	8.60946e-253
Nuak1	7.82352e-251	0.719426	0.221	0.033	1.46096e-246
Lpar6	5.57134e-249	0.94233	0.306	0.069	1.04039e-244
Ly6e	1.05291e-244	0.90766	0.849	0.569	1.96621e-240
Ptprm	1.36706e-243	0.7578	0.263	0.05	2.55285e-239
mt-Nd1	7.91971e-242	1.39874	0.51	0.182	1.47893e-237
Ramp2	1.10181e-241	1.05067	0.759	0.511	2.05752e-237
Galnt18	2.56871e-236	0.721192	0.241	0.043	4.79681e-232
Abcg2	1.16775e-235	1.11734	0.42	0.143	2.18065e-231
Dock9	1.39985e-235	0.911662	0.387	0.115	2.61407e-231
Scarb1	5.4281e-235	0.823837	0.242	0.044	1.01364e-230
Id3	5.0597e-234	1.0285	0.814	0.566	9.44849e-230
Cd200	5.94672e-233	0.967501	0.456	0.156	1.11049e-228
9930111J21Rik2	6.1769e-231	0.809955	0.301	0.069	1.15347e-226
Tcf4	5.04444e-226	0.985298	0.771	0.582	9.41999e-222
Edn1	1.25409e-225	1.21418	0.276	0.06	2.34189e-221
Gbp9	7.74676e-222	0.684121	0.218	0.037	1.44663e-217
Col8a1	1.17325e-221	1.00711	0.298	0.071	2.19093e-217
Ets1	1.03383e-219	0.827199	0.448	0.155	1.93057e-215
Uaca	1.92212e-218	1.09873	0.428	0.157	3.58937e-214
Rassf3	9.86592e-216	0.720048	0.277	0.062	1.84236e-211
Nedd9	3.45941e-214	0.841934	0.264	0.057	6.4601e-210
Mef2c	3.03358e-213	0.86315	0.441	0.154	5.66491e-209
Ldb2	1.01141e-212	0.785369	0.287	0.068	1.88871e-208
Nrp2	8.63409e-212	0.944768	0.249	0.052	1.61233e-207
Caskin2	1.50393e-211	0.653556	0.215	0.038	2.80844e-207
Hey1	1.47307e-210	0.928232	0.219	0.04	2.75081e-206
mt-Nd3	2.82828e-208	0.987912	0.362	0.103	5.28153e-204
Elk3	2.43608e-207	0.922198	0.385	0.129	4.54913e-203
Ece1	5.87581e-206	1.05175	0.532	0.261	1.09725e-201
Adgrl2	2.2011e-205	0.706367	0.222	0.042	4.11034e-201
Afdn	2.30851e-204	1.07552	0.459	0.187	4.31091e-200
mt-Co3	4.27605e-201	1.29883	0.327	0.086	7.9851e-197
mt-Co1	9.438e-201	1.10774	0.473	0.172	1.76245e-196
Hyal2	1.10984e-198	0.882118	0.332	0.1	2.07251e-194
Ephb4	4.51545e-197	0.745833	0.264	0.062	8.43214e-193
Entpd1	9.64688e-197	0.712074	0.233	0.048	1.80146e-192
Notch1	3.40878e-194	0.873228	0.37	0.124	6.36556e-190
Lrrc8c	3.32817e-193	0.798749	0.335	0.098	6.21503e-189
Lmo1	1.28075e-190	0.873273	0.343	0.11	2.39166e-186
Dab2ip	3.63982e-189	0.882268	0.375	0.129	6.797e-185
Tjp1	3.4072e-188	0.963813	0.424	0.167	6.36261e-184
Tmod3	3.25252e-187	1.08047	0.594	0.358	6.07376e-183
Ndrg1	3.8435e-186	0.811985	0.446	0.175	7.17735e-182
Gnai2	5.54158e-186	0.801263	0.793	0.72	1.03483e-181
H2-D1	6.95718e-185	0.656947	0.886	0.745	1.29918e-180
Plvap	5.93357e-184	1.93004	0.377	0.141	1.10803e-179
Cyp4b1	8.4376e-184	0.866154	0.287	0.076	1.57564e-179
Crispld1	3.91015e-183	0.635393	0.206	0.039	7.30181e-179
Plcb1	3.61228e-179	0.755123	0.266	0.068	6.74556e-175
Tsc22d1	3.52559e-178	0.952815	0.609	0.345	6.58369e-174
4931406P16Rik	8.59148e-178	0.833056	0.378	0.136	1.60437e-173
Myo10	5.4729e-176	0.848838	0.284	0.08	1.02201e-171
Sptbn1	9.87656e-175	0.769469	0.839	0.751	1.84435e-170
Tmcc3	5.41735e-168	0.941746	0.403	0.164	1.01164e-163
Ltbp4	3.32736e-161	0.979978	0.632	0.394	6.21351e-157
Ptma	5.766e-160	0.661415	0.891	0.806	1.07674e-155
Plcb4	3.53049e-159	0.907195	0.446	0.202	6.59283e-155
Hspa1a	8.02602e-159	1.21755	0.517	0.258	1.49878e-154
Crim1	9.51177e-158	0.714805	0.319	0.102	1.77623e-153
Fryl	1.30108e-155	0.758195	0.312	0.103	2.42964e-151
Serinc3	5.2369e-155	1.01007	0.671	0.49	9.77938e-151
Hip1	1.21624e-152	0.717898	0.293	0.092	2.27122e-148
Ets2	3.84675e-152	0.972925	0.34	0.126	7.18341e-148
mt-Nd5	4.13099e-152	0.893322	0.502	0.23	7.71421e-148
Utrn	1.41772e-151	0.974896	0.537	0.305	2.64745e-147
Cmtm8	3.05446e-148	0.567171	0.215	0.051	5.7039e-144
Nrp1	5.60689e-148	0.991481	0.557	0.33	1.04703e-143
Ybx1	2.45343e-146	0.674072	0.847	0.792	4.58154e-142
Vegfc	2.75789e-145	0.732152	0.237	0.064	5.15008e-141
St3gal6	3.90841e-145	0.602295	0.213	0.051	7.29857e-141
Adam15	4.6884e-145	1.05189	0.451	0.23	8.75511e-141
Tek	4.79587e-145	0.761839	0.411	0.172	8.9558e-141
Cdc42ep3	2.14928e-143	0.687132	0.314	0.104	4.01356e-139
Cd59a	7.68566e-139	0.681241	0.288	0.094	1.43522e-134
Txnip	1.21001e-138	0.681766	0.789	0.608	2.25957e-134
2900026A02Rik	6.2617e-136	0.640212	0.255	0.077	1.16931e-131
Cst3	7.90635e-135	0.344275	0.879	0.714	1.47643e-130
Nes	1.17372e-131	0.709338	0.232	0.066	2.1918e-127
Sult1a1	2.0112e-130	0.743847	0.294	0.102	3.75572e-126
Efnb1	1.25951e-126	0.838783	0.32	0.127	2.35201e-122
Bvht	1.55299e-125	0.696659	0.228	0.068	2.90006e-121
Clu	2.54679e-124	1.24852	0.333	0.135	4.75588e-120
Ptprg	2.62056e-123	0.71294	0.286	0.102	4.89364e-119
Rgs3	4.88488e-122	0.728338	0.301	0.115	9.12202e-118
Ehd4	1.11909e-121	1.36934	0.339	0.147	2.08979e-117
Pcdh1	1.69086e-121	0.651694	0.231	0.07	3.15751e-117
mt-Nd4l	6.87347e-121	0.870903	0.564	0.339	1.28355e-116
Cd2ap	4.89276e-120	0.94972	0.465	0.265	9.13674e-116
Jup	2.97536e-119	0.824702	0.368	0.169	5.5562e-115
Luzp1	2.27903e-118	0.837342	0.499	0.307	4.25586e-114
Pitpnc1	3.56955e-118	0.601685	0.257	0.085	6.66578e-114
Tanc1	1.92057e-117	0.708223	0.314	0.125	3.58647e-113
Ucp2	3.11244e-117	0.67444	0.309	0.118	5.81218e-113
Mpzl1	1.64148e-113	0.799117	0.317	0.134	3.06531e-109
H2-K1	1.45264e-112	0.648474	0.768	0.646	2.71266e-108
Arid5b	4.31574e-112	0.86154	0.477	0.281	8.05922e-108
Ssfa2	2.81134e-111	0.559952	0.218	0.067	5.24989e-107
Snrk	2.31944e-109	0.767906	0.485	0.287	4.33133e-105
Plekho1	1.95814e-108	0.520154	0.205	0.06	3.65663e-104
Gpr146	2.8342e-107	0.541149	0.219	0.069	5.29258e-103
Plpp1	1.17685e-106	1.04579	0.483	0.298	2.19764e-102
Ctnna1	1.23629e-106	0.793913	0.541	0.37	2.30864e-102
Pnpla2	2.72149e-106	0.702319	0.32	0.134	5.08212e-102
Nck1	1.87668e-105	0.850738	0.456	0.27	3.5045e-101
Msn	2.10067e-105	0.755734	0.61	0.463	3.92279e-101
B4galt4	7.2784e-104	0.607116	0.215	0.069	1.35917e-99
Rdx	1.58443e-102	0.907566	0.612	0.508	2.95876e-98
Enpp4	1.27467e-101	0.599552	0.235	0.082	2.38031e-97
Klf4	1.46943e-101	0.659016	0.781	0.634	2.74401e-97
Lmo2	1.50693e-101	0.781456	0.385	0.195	2.81404e-97
Tmem204	5.36452e-100	0.531267	0.228	0.076	1.00177e-95
Mapk3	1.33381e-99	0.895085	0.525	0.37	2.49075e-95
Timp3	3.34082e-99	0.580377	0.777	0.626	6.23865e-95
Smco4	1.30967e-98	0.836459	0.371	0.192	2.44568e-94
Jcad	1.32947e-96	0.694241	0.323	0.147	2.48265e-92
Acvrl1	3.09405e-95	0.80148	0.429	0.255	5.77783e-91
Dusp3	1.0173e-94	0.776889	0.385	0.207	1.8997e-90
Anp32a	3.24191e-94	0.807546	0.586	0.452	6.05395e-90
Actn4	2.1598e-92	0.781435	0.528	0.378	4.03322e-88
Vamp5	4.13508e-92	0.746509	0.343	0.171	7.72184e-88
Lrrc32	7.48469e-90	0.577476	0.215	0.075	1.39769e-85
Pls3	1.55079e-89	0.898357	0.457	0.293	2.89595e-85
Gm42418	5.14987e-88	0.649385	0.857	0.715	9.61686e-84
Slfn5	5.28274e-86	0.750837	0.679	0.561	9.86499e-82
Pdzd2	2.79798e-85	0.754834	0.345	0.173	5.22495e-81
Smad7	1.36826e-84	0.68619	0.309	0.146	2.5551e-80
Spint2	8.20216e-83	0.40159	0.235	0.084	1.53167e-78
Ubc	3.99911e-82	0.599181	0.768	0.646	7.46794e-78
Fbln5	8.07376e-82	1.22917	0.545	0.431	1.50769e-77
Cyr61	1.51765e-81	0.914521	0.602	0.443	2.83406e-77
Grasp	3.21606e-81	0.65059	0.3	0.141	6.00567e-77
Rsad2	1.3498e-79	0.858597	0.231	0.091	2.52062e-75
Cep85l	4.65233e-79	0.514579	0.211	0.079	8.68777e-75
Ehd2	8.30742e-79	0.720625	0.527	0.395	1.55133e-74
Swap70	7.28739e-78	0.629187	0.313	0.154	1.36085e-73
Adipor2	1.99819e-76	0.644007	0.299	0.147	3.73143e-72
St6galnac2	2.53444e-76	0.624204	0.224	0.091	4.73281e-72
Dusp6	3.45742e-76	0.648079	0.242	0.101	6.45639e-72
Arhgap18	1.64185e-75	0.649379	0.221	0.088	3.06599e-71
Ppp1r2	3.0005e-75	0.766659	0.602	0.499	5.60313e-71
Yes1	4.34824e-75	0.550959	0.219	0.087	8.1199e-71
Rnf125	7.10504e-75	0.526002	0.218	0.086	1.3268e-70
Myl12a	1.5278e-74	0.658838	0.757	0.692	2.85301e-70
Tns1	2.31756e-74	0.61401	0.511	0.356	4.32781e-70
Ctnnb1	3.23023e-74	0.730041	0.562	0.463	6.03213e-70
Socs2	4.44799e-74	0.57875	0.279	0.131	8.30617e-70
Kctd10	5.27223e-74	0.813912	0.357	0.205	9.84537e-70
Rab11a	2.18472e-73	0.858604	0.491	0.369	4.07974e-69
Sorbs1	4.03875e-72	0.428663	0.231	0.091	7.54196e-68
Ppp2r5a	3.12995e-71	0.72136	0.387	0.234	5.84486e-67
AY036118	1.76885e-70	1.2373	0.609	0.487	3.30316e-66
Map4k3	4.4085e-70	0.517865	0.208	0.082	8.23243e-66
Cdk19	7.74319e-70	0.62338	0.245	0.108	1.44596e-65
App	1.22965e-69	0.53711	0.714	0.665	2.29625e-65
Dennd5b	9.04414e-69	0.575141	0.215	0.088	1.6889e-64
Klf7	4.06552e-67	0.659141	0.491	0.361	7.59195e-63
Clic4	6.2311e-66	0.701357	0.581	0.487	1.1636e-61
Meox2	2.56709e-65	0.587976	0.365	0.207	4.79379e-61
Mast4	3.1568e-65	0.815581	0.408	0.272	5.89501e-61
Nxn	6.41856e-65	0.581249	0.261	0.128	1.1986e-60
Btg2	9.67654e-65	0.622913	0.734	0.652	1.807e-60
Tagln2	2.17453e-64	0.559959	0.636	0.504	4.06071e-60
Wasf2	1.11962e-63	0.650062	0.566	0.481	2.09079e-59
Ddit4	5.65253e-63	0.651325	0.268	0.132	1.05555e-58
Tgfb1	5.97902e-63	0.552519	0.295	0.154	1.11652e-58
Ralgapa1	1.13445e-62	0.527774	0.266	0.131	2.11846e-58
Ppfibp1	3.83219e-62	0.695083	0.459	0.337	7.15623e-58
Foxp1	1.07423e-61	0.672407	0.491	0.37	2.00602e-57
Cxcl12	1.37625e-61	0.924389	0.574	0.452	2.57e-57
Cdkn1c	2.162e-60	0.939596	0.395	0.247	4.03732e-56
Mkl2	9.34603e-60	0.522146	0.216	0.096	1.74528e-55
Fam212a	3.41362e-59	0.59642	0.205	0.089	6.3746e-55
Ehd1	2.00423e-58	0.691475	0.473	0.36	3.7427e-54
Trim24	3.31129e-58	0.564885	0.276	0.143	6.1835e-54
Plxnd1	5.04586e-58	0.544021	0.221	0.102	9.42263e-54
Alpl	1.81649e-57	0.635386	0.203	0.09	3.39211e-53
Dst	2.03361e-57	0.614103	0.517	0.399	3.79756e-53
Ier3	1.31701e-56	0.763233	0.465	0.333	2.45939e-52
Wwtr1	1.34441e-56	0.617125	0.391	0.262	2.51055e-52
Cavin1	2.96443e-56	0.500622	0.677	0.605	5.53578e-52
Sh3glb1	3.102e-56	0.558596	0.657	0.625	5.79267e-52
Car4	6.55505e-56	0.946585	0.202	0.091	1.22409e-51
Xiap	7.72612e-56	0.634525	0.356	0.221	1.44278e-51
Fbxl7	1.75524e-55	0.552826	0.242	0.118	3.27774e-51
Apbb2	7.1707e-55	0.597425	0.358	0.221	1.33906e-50
Fmo1	7.27593e-55	0.667896	0.272	0.146	1.35871e-50
Ripor1	5.23964e-54	0.503804	0.227	0.11	9.7845e-50
Cers4	5.26117e-54	0.442115	0.248	0.122	9.82472e-50
Myh9	1.32295e-52	0.729379	0.428	0.313	2.47049e-48
Syne1	3.08776e-52	0.542147	0.283	0.154	5.76608e-48
Cmip	4.22533e-51	0.562163	0.299	0.17	7.89038e-47
Sypl	1.71575e-50	0.672946	0.438	0.329	3.20398e-46
Hspa8	1.81343e-50	0.385737	0.775	0.715	3.3864e-46
Myl12b	1.20863e-49	0.635248	0.591	0.532	2.257e-45
Gbp7	4.45176e-48	0.61495	0.329	0.205	8.31321e-44
Bnip2	4.63174e-48	0.669138	0.443	0.342	8.64931e-44
Ctnnbip1	7.58622e-48	0.660754	0.324	0.209	1.41665e-43
Arpc3	2.41208e-47	0.549623	0.637	0.584	4.50432e-43
Atp5j	2.46483e-47	0.437449	0.733	0.69	4.60283e-43
Adamts1	1.15235e-46	0.866691	0.523	0.449	2.15189e-42
Cd151	3.51959e-46	0.626277	0.494	0.403	6.57249e-42
Slc3a2	8.1849e-46	0.65465	0.453	0.355	1.52845e-41
Fam43a	1.26638e-45	0.644022	0.244	0.133	2.36483e-41
Lbr	2.09957e-45	0.44406	0.205	0.099	3.92073e-41
Inpp1	2.4099e-45	0.473231	0.247	0.132	4.50025e-41
Fcho2	3.99914e-45	0.575249	0.318	0.197	7.46799e-41
H2-Q6	5.07729e-45	0.47973	0.229	0.119	9.48133e-41
Ddx5	8.5101e-45	0.328798	0.801	0.77	1.58918e-40
Phc2	5.39753e-44	0.474316	0.259	0.147	1.00794e-39
Clec2d	5.52198e-44	0.605378	0.425	0.312	1.03118e-39
Rhob	9.91398e-44	0.605167	0.55	0.455	1.85134e-39
Ablim1	1.25238e-43	0.48339	0.547	0.439	2.33869e-39
Syne2	4.22907e-43	0.548305	0.352	0.231	7.89736e-39
Atp1b3	2.902e-42	0.607498	0.422	0.324	5.4192e-38
Calcrl	4.78023e-42	0.655414	0.219	0.115	8.92661e-38
Gm20594	5.11557e-42	0.487713	0.259	0.145	9.55281e-38
Azin1	9.12482e-42	0.736969	0.334	0.228	1.70397e-37
Casp8	9.15337e-42	0.467821	0.232	0.127	1.7093e-37
Tmem245	1.49212e-41	0.515297	0.254	0.145	2.78639e-37
Heg1	2.65877e-41	0.601754	0.538	0.457	4.96499e-37
Limch1	2.11784e-40	0.346777	0.26	0.14	3.95486e-36
Tspan9	2.87285e-40	0.504295	0.203	0.106	5.36476e-36
Arhgap29	7.26078e-40	0.552667	0.422	0.317	1.35588e-35
Nfkbia	1.40023e-39	0.255999	0.694	0.614	2.6148e-35
Cdkn1a	1.91728e-39	0.622818	0.42	0.302	3.58033e-35
Actg1	3.42242e-39	0.384882	0.817	0.759	6.39103e-35
Clic1	8.24671e-39	0.468993	0.653	0.62	1.53999e-34
Bst2	1.38442e-38	0.375728	0.592	0.468	2.58527e-34
Cds2	2.2562e-38	0.435817	0.216	0.115	4.21322e-34
Tspan12	7.1913e-38	0.462822	0.218	0.119	1.3429e-33
Ephx1	7.3803e-38	0.459605	0.273	0.165	1.3782e-33
Ier5l	1.15345e-37	0.584254	0.286	0.182	2.15396e-33
Cd81	1.88989e-37	0.430905	0.794	0.762	3.52918e-33
Glul	2.34217e-37	0.813172	0.486	0.41	4.37377e-33
Psmb8	3.49249e-37	0.544008	0.552	0.475	6.52187e-33
Cox5a	3.91158e-37	0.465498	0.546	0.454	7.30449e-33
H2-Q7	6.93293e-37	0.432391	0.363	0.244	1.29466e-32
Pcmtd1	7.36832e-37	0.527046	0.398	0.302	1.37596e-32
Pxdc1	8.33177e-37	0.486526	0.262	0.158	1.55587e-32
Cd9	4.12582e-36	0.314533	0.625	0.501	7.70455e-32
Gadd45g	6.13968e-36	0.553312	0.49	0.375	1.14652e-31
Dusp1	1.03862e-35	0.458233	0.691	0.622	1.93951e-31
Iigp1	3.51075e-35	0.597735	0.39	0.278	6.55597e-31
Tmed5	6.71442e-35	0.567944	0.442	0.365	1.25385e-30
Wwc2	9.56582e-35	0.529143	0.378	0.279	1.78632e-30
Ppia	6.9122e-34	0.292253	0.845	0.824	1.29078e-29
Itgb1	8.88179e-34	0.411682	0.651	0.639	1.65859e-29
Stox2	2.6426e-33	0.464653	0.205	0.115	4.93479e-29
Orai1	2.84045e-33	0.413119	0.219	0.124	5.30425e-29
Pltp	4.68973e-33	0.473419	0.224	0.127	8.75761e-29
Mef2a	6.47869e-33	0.462631	0.35	0.25	1.20983e-28
Adam10	7.99587e-33	0.468527	0.301	0.201	1.49315e-28
Sh3bp5	1.65425e-32	0.564245	0.271	0.175	3.08915e-28
Tubb4b	2.10107e-32	0.500782	0.525	0.449	3.92353e-28
Dram2	6.94421e-32	0.536611	0.264	0.171	1.29676e-27
Ptbp3	1.14551e-31	0.508352	0.396	0.313	2.13913e-27
Diaph2	1.16793e-31	0.46229	0.276	0.18	2.181e-27
Dnaja1	1.24531e-30	0.378537	0.683	0.658	2.32549e-26
Tnfaip1	1.46263e-30	0.552445	0.327	0.239	2.73131e-26
Cpne8	5.23156e-30	0.378782	0.236	0.141	9.76942e-26
mt-Atp8	5.38095e-30	0.452338	0.293	0.195	1.00484e-25
Flnb	5.54713e-30	0.420905	0.258	0.163	1.03587e-25
Macf1	1.82359e-29	0.507777	0.475	0.417	3.40537e-25
Qk	2.01739e-29	0.493324	0.445	0.375	3.76726e-25
Pdlim1	2.29107e-29	0.560346	0.369	0.281	4.27834e-25
Psmb9	2.85781e-29	0.53475	0.353	0.266	5.33667e-25
Avpi1	3.60638e-29	0.479552	0.227	0.139	6.73456e-25
Ppp1r15a	4.69607e-29	0.58848	0.544	0.504	8.76944e-25
Klf13	3.16013e-28	0.505768	0.49	0.443	5.90123e-24
2010111I01Rik	3.58053e-28	0.354374	0.227	0.137	6.68628e-24
Sptan1	6.9326e-28	0.552648	0.454	0.4	1.29459e-23
Gna11	8.52902e-28	0.515983	0.412	0.345	1.59271e-23
Atp13a3	1.5172e-27	0.542662	0.261	0.175	2.83322e-23
Picalm	1.61225e-27	0.551011	0.412	0.345	3.01072e-23
Gopc	3.96227e-27	0.392053	0.215	0.132	7.39914e-23
Tob1	7.62503e-27	0.463113	0.305	0.214	1.4239e-22
Cpd	1.10451e-26	0.503951	0.337	0.257	2.06257e-22
Kctd12	1.40114e-26	0.421149	0.295	0.205	2.6165e-22
2022-09-04	2.87033e-26	0.476674	0.256	0.17	5.36006e-22
Elovl5	3.22001e-26	0.507669	0.24	0.155	6.01305e-22
Arhgap5	5.32302e-26	0.54433	0.392	0.327	9.94021e-22
Ier5	5.71638e-26	0.432658	0.434	0.348	1.06748e-21
Fxyd5	1.16284e-25	0.595052	0.43	0.361	2.17149e-21
Itsn2	2.09798e-25	0.426621	0.287	0.2	3.91777e-21
Hnrnpf	2.23874e-25	0.418064	0.61	0.592	4.18062e-21
Gngt2	4.31051e-25	0.630936	0.348	0.272	8.04945e-21
Lrrfip1	4.73122e-25	0.459105	0.29	0.207	8.83508e-21
Cnn3	5.4573e-25	0.46263	0.505	0.462	1.0191e-20
Cyb5r3	7.49539e-25	0.589919	0.485	0.46	1.39969e-20
Klhl24	8.36098e-25	0.458	0.313	0.229	1.56133e-20
Nfe2l1	1.07462e-24	0.480565	0.359	0.286	2.00674e-20
Ywhah	3.05275e-24	0.462419	0.48	0.437	5.7007e-20
Dhrs3	2.67498e-23	0.500483	0.256	0.178	4.99525e-19
Ccdc85b	3.36423e-23	0.492507	0.266	0.19	6.28236e-19
Jag1	3.44825e-23	0.511792	0.213	0.137	6.43927e-19
Fkbp1a	4.6748e-23	0.453601	0.666	0.667	8.72972e-19
Atp1a1	4.84811e-23	0.539078	0.383	0.325	9.05335e-19
Tmem140	5.60326e-23	0.466607	0.339	0.263	1.04635e-18
Btg1	5.82874e-23	0.326352	0.523	0.463	1.08846e-18
Fez2	1.86867e-22	0.475871	0.321	0.245	3.48956e-18
Tpm3	1.96194e-22	0.450923	0.479	0.447	3.66374e-18
H2-T23	3.6314e-22	0.46378	0.49	0.434	6.78128e-18
Itpr1	5.26214e-22	0.392001	0.236	0.158	9.82653e-18
H3f3a	1.0355e-21	0.299255	0.747	0.763	1.93369e-17
Sgms1	1.04223e-21	0.354431	0.202	0.128	1.94626e-17
Osbpl9	1.38313e-21	0.472	0.295	0.223	2.58286e-17
Git2	3.42726e-21	0.430559	0.259	0.184	6.40006e-17
Ier2	3.552e-21	0.302167	0.626	0.559	6.63301e-17
Apc	4.44529e-21	0.443745	0.263	0.188	8.30113e-17
Bmpr2	4.49327e-21	0.430715	0.343	0.273	8.39073e-17
Galnt15	6.34278e-21	0.289288	0.216	0.136	1.18445e-16
Baz2b	1.25468e-20	0.426404	0.305	0.233	2.34298e-16
Kif5b	1.53336e-20	0.437979	0.564	0.565	2.86339e-16
Irf1	2.4016e-20	0.553952	0.411	0.361	4.48475e-16
Foxn3	2.93146e-20	0.416236	0.377	0.314	5.47422e-16
Cdc42bpb	8.05965e-20	0.36933	0.219	0.148	1.50506e-15
H2-Q4	1.42609e-19	0.447913	0.295	0.227	2.66308e-15
Spag9	1.47942e-19	0.413266	0.485	0.457	2.76266e-15
Pparg	3.10682e-19	0.47755	0.245	0.177	5.80168e-15
Vamp3	7.12522e-19	0.458198	0.282	0.217	1.33056e-14
Ralb	8.4568e-19	0.471391	0.277	0.214	1.57922e-14
Hpcal1	8.89043e-19	0.450712	0.235	0.166	1.6602e-14
Map4	1.53721e-18	0.492861	0.348	0.295	2.87059e-14
Kras	2.46258e-18	0.452879	0.358	0.302	4.59863e-14
Atox1	3.72553e-18	0.467402	0.605	0.599	6.95705e-14
Sod1	6.00432e-18	0.458473	0.404	0.36	1.12125e-13
Rhoa	8.662e-18	0.322719	0.711	0.722	1.61754e-13
Fermt2	1.42878e-17	0.336261	0.581	0.58	2.66811e-13
Zcchc6	2.86808e-17	0.446882	0.36	0.311	5.35585e-13
Rbpms	5.81363e-17	0.423631	0.469	0.439	1.08564e-12
Klf3	2.32584e-16	0.404786	0.44	0.402	4.34327e-12
Tap2	4.43834e-16	0.485884	0.331	0.28	8.28816e-12
Tpst2	4.9153e-16	0.435164	0.266	0.207	9.17883e-12
Plscr1	5.6098e-16	0.461126	0.204	0.146	1.04757e-11
Pfkl	5.96624e-16	0.402038	0.204	0.145	1.11414e-11
Cdc42bpa	6.77529e-16	0.373211	0.255	0.193	1.26522e-11
Fgl2	1.0502e-15	0.255682	0.139	0.246	1.96114e-11
Icam1	1.35373e-15	0.671765	0.316	0.26	2.52796e-11
Ccser2	2.19711e-15	0.406916	0.361	0.316	4.10288e-11
Mcl1	3.53883e-15	0.430538	0.533	0.531	6.60841e-11
Jun	6.40066e-15	0.314665	0.718	0.716	1.19526e-10
Tmbim6	9.47465e-15	0.341458	0.627	0.65	1.7693e-10
Ndufa8	9.948e-15	0.511853	0.491	0.49	1.85769e-10
Plec	3.03353e-14	0.444663	0.347	0.305	5.66481e-10
Prcp	3.59371e-14	0.331612	0.205	0.147	6.7109e-10
Apobec3	4.5029e-14	0.290656	0.227	0.165	8.40872e-10
Atp2b4	4.98383e-14	0.342404	0.208	0.148	9.30681e-10
Trim47	5.1407e-14	0.506218	0.353	0.309	9.59974e-10
Tmpo	1.23348e-13	0.347162	0.311	0.253	2.3034e-09
Actn1	1.36872e-13	0.401562	0.212	0.158	2.55594e-09
Purb	1.79409e-13	0.410735	0.395	0.365	3.35029e-09
Lifr	1.93162e-13	0.422204	0.303	0.252	3.6071e-09
Phactr2	1.98855e-13	0.344188	0.282	0.226	3.71342e-09
Ctbp2	1.99676e-13	0.370692	0.211	0.159	3.72874e-09
Tpm4	2.18302e-13	0.31987	0.591	0.577	4.07658e-09
1700020I14Rik	2.55613e-13	0.411715	0.375	0.341	4.77331e-09
Il10rb	3.05704e-13	0.402064	0.276	0.227	5.70871e-09
Rfk	4.24473e-13	0.406575	0.207	0.156	7.9266e-09
Smpdl3a	4.33419e-13	0.533469	0.38	0.35	8.09367e-09
Sptlc2	1.00301e-12	0.416235	0.261	0.212	1.87302e-08
Gstt2	1.48214e-12	0.414944	0.216	0.164	2.76775e-08
Skap2	2.08825e-12	0.403311	0.247	0.195	3.8996e-08
Card19	2.12138e-12	0.399406	0.269	0.223	3.96146e-08
Rras	2.24595e-12	0.382097	0.468	0.471	4.19409e-08
Myo1c	2.72394e-12	0.387842	0.264	0.217	5.08669e-08
Kmt2e	5.29926e-12	0.346943	0.465	0.459	9.89583e-08
Srsf5	5.67749e-12	0.265364	0.634	0.642	1.06021e-07
Nus1	1.15453e-11	0.36129	0.241	0.193	2.15596e-07
Eln	1.26907e-11	0.430242	0.371	0.327	2.36987e-07
Psmb10	1.43067e-11	0.44888	0.419	0.402	2.67162e-07
Ccny	1.46258e-11	0.355105	0.216	0.168	2.73122e-07
Sf3b1	1.64104e-11	0.308891	0.547	0.567	3.06448e-07
Znrf1	1.7482e-11	0.34513	0.208	0.161	3.26458e-07
Rfxap	2.07194e-11	0.344536	0.211	0.164	3.86914e-07
Dab2	2.1521e-11	0.377492	0.263	0.214	4.01884e-07
Taf7	2.33445e-11	0.378366	0.236	0.187	4.35936e-07
Epn2	5.82485e-11	0.373062	0.239	0.191	1.08773e-06
Arpc2	1.45384e-10	0.295533	0.627	0.651	2.7149e-06
Ankrd12	1.55559e-10	0.3587	0.411	0.389	2.90491e-06
Atrx	2.05602e-10	0.355592	0.493	0.508	3.83941e-06
Ptk2	2.6147e-10	0.297227	0.208	0.162	4.88269e-06
Mylip	3.27792e-10	0.387894	0.256	0.21	6.12119e-06
Samd9l	4.02458e-10	0.366619	0.267	0.222	7.51551e-06
Psme1	5.06011e-10	0.387156	0.457	0.453	9.44925e-06
Gbp2	5.72163e-10	0.466889	0.285	0.243	1.06846e-05
Tspo	6.74657e-10	0.313027	0.642	0.661	1.25985e-05
Parp14	8.73391e-10	0.389204	0.243	0.199	1.63097e-05
Ptp4a3	9.28224e-10	0.293799	0.236	0.192	1.73337e-05
Fus	1.19755e-09	0.292719	0.661	0.719	2.2363e-05
Zfand5	1.3446e-09	0.36071	0.478	0.483	2.5109e-05
Fzd4	1.41886e-09	0.314549	0.335	0.298	2.64959e-05
Thbd	1.45446e-09	0.273559	0.352	0.3	2.71607e-05
Npr1	1.6337e-09	0.365	0.262	0.22	3.05077e-05
Ppp3ca	1.97446e-09	0.387031	0.405	0.397	3.68711e-05
Iqgap1	2.1921e-09	0.339929	0.469	0.48	4.09352e-05
Smchd1	2.59393e-09	0.362843	0.295	0.258	4.8439e-05
Mob2	4.45071e-09	0.372426	0.236	0.195	8.31126e-05
Cr1l	4.48086e-09	0.381388	0.364	0.348	8.36755e-05
Sertad2	5.23828e-09	0.351601	0.224	0.183	9.78197e-05
Ctsd	6.44728e-09	0.561138	0.557	0.603	0.000120396
Filip1l	9.27095e-09	0.264785	0.363	0.332	0.000173126
Ndufc2	9.28504e-09	0.420851	0.502	0.511	0.000173389
Sp100	1.04307e-08	0.365144	0.34	0.313	0.000194783
Ace	1.28261e-08	0.331216	0.33	0.288	0.000239514
Zfp36	1.67793e-08	0.2683	0.509	0.499	0.000313338
Snx3	2.25537e-08	0.31294	0.52	0.536	0.000421168
Hspa1b	2.51149e-08	0.383063	0.248	0.211	0.000468995
Ccnd2	2.56956e-08	0.346835	0.432	0.413	0.00047984
Sbno2	2.59136e-08	0.393096	0.321	0.294	0.00048391
Mxd4	3.1804e-08	0.356051	0.503	0.531	0.000593907
Ostf1	3.31919e-08	0.354787	0.477	0.489	0.000619826
Chmp5	4.37663e-08	0.441708	0.369	0.366	0.000817293
Arhgap17	6.39092e-08	0.272916	0.217	0.177	0.00119344
Flii	8.48393e-08	0.282137	0.247	0.21	0.00158429
Gbp3	1.0309e-07	0.377256	0.213	0.176	0.00192511
Sh3glb2	1.06801e-07	0.354152	0.223	0.19	0.0019944
Syf2	1.50499e-07	0.352095	0.389	0.384	0.00281043
Rtl8a	1.76049e-07	0.366832	0.211	0.178	0.00328753
Adipor1	2.67072e-07	0.376388	0.357	0.351	0.00498731
Fbxo22	3.15003e-07	0.316639	0.205	0.171	0.00588237
Dazap2	3.89509e-07	0.309279	0.364	0.353	0.00727369
Stx12	6.36002e-07	0.399243	0.281	0.261	0.0118767
Phf20l1	8.92034e-07	0.333308	0.284	0.26	0.0166578
Cltb	1.33515e-06	0.340289	0.443	0.457	0.0249326
Midn	1.47643e-06	0.301048	0.26	0.233	0.0275709
Ywhaq	1.68087e-06	0.319656	0.554	0.596	0.0313886
Tmem109	2.22433e-06	0.401431	0.321	0.307	0.0415371
Rac1	2.4448e-06	0.269084	0.596	0.648	0.0456542
Rassf1	3.3936e-06	0.30085	0.345	0.332	0.0633721
Fbln2	3.51668e-06	0.366776	0.502	0.539	0.0656704
Arhgef2	4.4679e-06	0.26996	0.227	0.198	0.0834336
Arglu1	4.69366e-06	0.327085	0.428	0.435	0.0876495
Gnaq	6.06513e-06	0.315584	0.267	0.243	0.11326
Pdlim5	7.34162e-06	0.31705	0.236	0.21	0.137097
Gabarapl2	1.31623e-05	0.326167	0.468	0.504	0.245793
Hnrnpu	1.51746e-05	0.27893	0.567	0.613	0.283371
Slk	1.81265e-05	0.285954	0.28	0.26	0.338494
Btbd7	1.90075e-05	0.271882	0.287	0.268	0.354946
Chmp2a	2.02039e-05	0.337105	0.492	0.519	0.377288
Ubl3	2.10258e-05	0.272383	0.305	0.29	0.392636
Map7d1	2.38889e-05	0.368913	0.303	0.296	0.446102
1810037I17Rik	2.48132e-05	0.276917	0.508	0.529	0.463361
Arl6ip1	3.33544e-05	0.26243	0.493	0.518	0.622861
Tubb2a	3.72898e-05	0.359399	0.377	0.378	0.696349
Mbnl2	4.4687e-05	0.29371	0.469	0.505	0.834485
Slc38a2	5.70377e-05	0.303118	0.492	0.52	1
Ddx3x	6.6577e-05	0.279728	0.533	0.594	1
Lars2	7.17505e-05	0.256254	0.327	0.304	1
Irf9	7.86776e-05	0.318953	0.231	0.212	1
Pla2g16	8.01774e-05	0.289884	0.322	0.309	1
Vgll4	8.97517e-05	0.273523	0.258	0.239	1
Irf2	0.000106375	0.292778	0.285	0.272	1
Elk4	0.000111838	0.257502	0.224	0.202	1
Nmi	0.000117083	0.298727	0.235	0.216	1
Hist1h2bc	0.000135161	0.316819	0.333	0.322	1
Tnfrsf1a	0.000176389	0.310892	0.431	0.449	1
Clstn1	0.000179669	0.32851	0.267	0.255	1
Ssu72	0.000196492	0.326126	0.367	0.376	1
Rock1	0.000211456	0.263992	0.434	0.457	1
Akap12	0.000217294	0.353527	0.38	0.385	1
Tspan4	0.000249079	0.350558	0.366	0.365	1
Ccdc12	0.000251353	0.323069	0.423	0.449	1
Pak2	0.00029451	0.252133	0.333	0.331	1
Xaf1	0.000375026	0.315719	0.259	0.245	1
Herc2	0.000498645	0.29145	0.21	0.192	1
Mndal	0.000867494	0.308081	0.368	0.365	1
Aggf1	0.000869588	0.294266	0.21	0.195	1
Nol7	0.00115093	0.321955	0.381	0.403	1
Gnb1	0.00126758	0.312808	0.484	0.523	1
Top1	0.00140676	0.277794	0.466	0.509	1
Nfat5	0.00150697	0.298052	0.261	0.251	1
Arhgef12	0.00184949	0.306481	0.361	0.381	1
Smc1a	0.00185619	0.299056	0.406	0.437	1
Nrbp1	0.00199053	0.282491	0.244	0.234	1
Ndfip2	0.00230414	0.256838	0.249	0.24	1
Rab5c	0.00266376	0.309102	0.374	0.399	1
Pak1ip1	0.00382351	0.290396	0.237	0.231	1
Hexim1	0.00683156	0.269349	0.256	0.253	1
Peak1	0.00815707	0.25388	0.292	0.293	1
Dnajc8	0.00841207	0.281427	0.385	0.408	1
Fbxw2	0.00920025	0.281574	0.277	0.282	1
Abhd17a	0.0100123	0.313729	0.323	0.344	1
Hmg20b	0.0106015	0.292889	0.27	0.275	1
S100a1	0.0108444	0.286251	0.371	0.38	1
Tulp4	0.0183589	0.299146	0.273	0.278	1
Capn2	0.0193092	0.289832	0.393	0.424	1
Gls	0.0232227	0.273733	0.349	0.369	1
Nudt4	0.0235179	0.418636	0.307	0.324	1
Hprt	0.0289443	0.345338	0.269	0.279	1
Tcn2	0.0296734	0.282506	0.295	0.303	1
B230219D22Rik	0.0491822	0.26252	0.322	0.342	1
Tmem30a	0.0628237	0.252904	0.395	0.44	1
Tapbp	0.0645999	0.281103	0.473	0.531	1
Slc50a1	0.0683714	0.307624	0.413	0.454	1
Pnkd	0.0694746	0.275946	0.314	0.333	1
Capza2	0.0738845	0.283432	0.467	0.526	1
Irf7	0.118667	0.295943	0.229	0.227	1
Cebpg	0.147387	0.28101	0.282	0.302	1
Tmbim1	0.148583	0.250467	0.25	0.257	1
Sdcbp	0.154964	0.257339	0.475	0.54	1
Il6st	0.172284	0.509498	0.404	0.473	1
Ubald2	0.191174	0.283202	0.259	0.273	1
Taldo1	0.226522	0.257673	0.366	0.405	1
Hes1	0.260913	0.285435	0.248	0.26	1
Ifi35	0.262603	0.285222	0.279	0.298	1
Sugt1	0.273534	0.270879	0.342	0.383	1
Pdcd10	0.2817	0.276425	0.305	0.336	1
Ccnd3	0.297159	0.342006	0.305	0.337	1
Spop	0.430488	0.277365	0.398	0.462	1
Sbds	0.455749	0.278854	0.328	0.37	1
Bsg	0.701269	0.254364	0.636	0.723	1
Hmox2	0.783874	0.253355	0.208	0.228	1
Mob4	0.809742	0.257719	0.252	0.279	1
Smim10l1	0.825827	0.250061	0.343	0.405	1

## Sheet: VSMC
	p_val	avg_logFC	pct.1	pct.2	p_val_adj
Acta2	0	3.60189	0.752	0.11	0
Tagln	0	3.59758	0.772	0.095	0
Rgs5	0	3.57187	0.607	0.034	0
Myl9	0	3.34577	0.891	0.205	0
Tpm2	0	3.18779	0.894	0.167	0
Myh11	0	3.18486	0.696	0.027	0
Mylk	0	2.48921	0.767	0.075	0
Sncg	0	2.45825	0.643	0.073	0
Tpm1	0	2.41567	0.824	0.413	0
Ppp1r14a	0	2.35704	0.821	0.092	0
Lmod1	0	2.16049	0.629	0.017	0
Rgs4	0	2.11787	0.68	0.012	0
Notch3	0	2.10882	0.819	0.097	0
Higd1b	0	1.98144	0.44	0.015	0
Gucy1a1	0	1.91913	0.729	0.053	0
Ndufa4l2	0	1.82953	0.729	0.25	0
Csrp1	0	1.82398	0.752	0.294	0
Mustn1	0	1.80997	0.624	0.162	0
Mfge8	0	1.76243	0.884	0.462	0
Art3	0	1.73734	0.418	0.065	0
Pcp4l1	0	1.68446	0.522	0.009	0
Rasl11a	0	1.60331	0.58	0.07	0
Itga1	0	1.56578	0.717	0.125	0
Tinagl1	0	1.56094	0.771	0.095	0
Olfr558	0	1.54621	0.506	0.004	0
Mcam	0	1.54147	0.607	0.036	0
Myo1b	0	1.51229	0.567	0.113	0
Cox4i2	0	1.51131	0.489	0.056	0
Nrip2	0	1.50165	0.491	0.006	0
Bcam	0	1.48377	0.673	0.085	0
Gucy1b1	0	1.4734	0.604	0.061	0
Hspb1	0	1.44693	0.807	0.326	0
Gja4	0	1.40072	0.585	0.04	0
Sorbs2	0	1.39167	0.384	0.052	0
Map3k20	0	1.37871	0.544	0.125	0
Rasgrp2	0	1.37164	0.584	0.061	0
Cald1	0	1.35992	0.935	0.675	0
Pdgfa	0	1.33154	0.606	0.083	0
Tsc22d1	0	1.32598	0.823	0.341	0
Ppp1r12b	0	1.32521	0.515	0.092	0
Gjc1	0	1.31212	0.607	0.137	0
Heyl	0	1.31098	0.499	0.07	0
Epas1	0	1.30055	0.71	0.155	0
Carmn	0	1.28484	0.463	0.041	0
Synpo2	0	1.28007	0.399	0.023	0
Aoc3	0	1.27273	0.647	0.202	0
Tbx2	0	1.25972	0.496	0.033	0
Mef2c	0	1.24941	0.6	0.155	0
Sorbs1	0	1.24667	0.542	0.078	0
Cnn1	0	1.23915	0.239	0.016	0
Rbpms2	0	1.23693	0.429	0.026	0
Des	0	1.22887	0.471	0.05	0
Timp4	0	1.21073	0.383	0.039	0
Pnpla2	0	1.2092	0.531	0.128	0
Btbd3	0	1.18713	0.523	0.089	0
Rasl12	0	1.18089	0.51	0.071	0
Esam	0	1.17412	0.642	0.086	0
Fbxl22	0	1.17263	0.343	0.019	0
Lgalsl	0	1.15793	0.534	0.124	0
P2rx1	0	1.15127	0.354	0.004	0
Atp1b2	0	1.14204	0.454	0.029	0
Rgs7bp	0	1.12623	0.352	0.007	0
Tbx5	0	1.12557	0.349	0.014	0
Pln	0	1.12108	0.234	0.002	0
Cspg4	0	1.11669	0.441	0.039	0
Kcnk3	0	1.09839	0.382	0.006	0
Myl1	0	1.08051	0.35	0.015	0
Itga7	0	1.07982	0.395	0.017	0
Pdlim3	0	1.07191	0.389	0.02	0
Fabp4	0	1.0661	0.851	0.244	0
Crim1	0	1.05256	0.52	0.098	0
Filip1	0	1.04726	0.445	0.055	0
Ano1	0	1.04309	0.433	0.03	0
Ednrb	0	1.01893	0.264	0.022	0
Nexn	0	0.994994	0.36	0.055	0
Nrarp	0	0.977213	0.379	0.025	0
Tesc	0	0.973305	0.361	0.013	0
Parm1	0	0.959947	0.362	0.023	0
Fry	0	0.948194	0.4	0.046	0
Inpp4b	0	0.948133	0.397	0.02	0
Hspb2	0	0.942621	0.379	0.042	0
Foxs1	0	0.938695	0.363	0.056	0
Dmd	0	0.937617	0.418	0.068	0
Ngf	0	0.93687	0.354	0.049	0
Mamdc2	0	0.889457	0.349	0.015	0
Tbc1d1	0	0.884974	0.411	0.064	0
Olfml2a	0	0.880258	0.325	0.027	0
Tcf15	0	0.877279	0.455	0.063	0
Cobll1	0	0.87644	0.385	0.045	0
Nes	0	0.872	0.388	0.063	0
Ccdc3	0	0.869981	0.405	0.049	0
Hopx	0	0.86839	0.332	0.029	0
Mrvi1	0	0.828248	0.329	0.029	0
Sgip1	0	0.819734	0.306	0.022	0
Rnf152	0	0.814671	0.345	0.039	0
Serpini1	0	0.805426	0.263	0.008	0
Bcar3	0	0.804156	0.3	0.03	0
Daam2	0	0.80051	0.295	0.018	0
Casq2	0	0.773962	0.242	0.002	0
Slc2a4	0	0.769763	0.274	0.015	0
Kcna5	0	0.753151	0.267	0.008	0
Lmcd1	0	0.747841	0.285	0.028	0
Fgf1	0	0.73547	0.273	0.029	0
Cap2	0	0.735412	0.278	0.008	0
Dgkb	0	0.730033	0.257	0.002	0
Ajuba	0	0.719247	0.23	0.018	0
Cacna1c	0	0.711973	0.273	0.014	0
Gprc5c	0	0.703621	0.262	0.02	0
Tmem51	0	0.703431	0.292	0.026	0
Hspb6	0	0.693002	0.218	0.013	0
Jph2	0	0.674896	0.256	0.003	0
Ldb3	0	0.654035	0.234	0.003	0
Myom1	0	0.650369	0.234	0.002	0
Tspan2	0	0.640617	0.294	0.03	0
Rbm24	0	0.633634	0.226	0.005	0
Susd5	0	0.619531	0.204	0.001	0
Asb2	0	0.601018	0.222	0.005	0
Ppm1l	0	0.599875	0.238	0.019	0
Olfr78	0	0.579808	0.207	0.001	0
Map3k7cl	0	0.560633	0.203	0.002	0
Cdh6	0	0.551089	0.202	0.001	0
Cck	0	0.548368	0.202	0.013	0
Sbspon	0	0.52785	0.203	0.012	0
Kcnb1	2.73323e-303	0.472957	0.205	0.015	5.10403e-299
Speg	2.16568e-302	0.552203	0.21	0.017	4.04418e-298
Prkg1	1.16051e-300	0.70442	0.289	0.034	2.16713e-296
Serpine2	3.06262e-297	1.14199	0.593	0.17	5.71914e-293
Ptp4a3	6.2669e-296	1.55383	0.58	0.173	1.17028e-291
S1pr3	1.18882e-291	1.06804	0.489	0.116	2.22e-287
Ppp1r12a	1.47835e-279	1.51676	0.742	0.358	2.76068e-275
Wtip	3.23069e-277	1.18599	0.502	0.131	6.03298e-273
Pdgfrb	1.0412e-272	1.42487	0.732	0.301	1.94434e-268
Mark1	1.24807e-269	0.574282	0.244	0.027	2.33064e-265
Rasd1	3.25426e-267	0.850374	0.307	0.045	6.07701e-263
Itga8	1.37738e-261	0.572074	0.215	0.021	2.57213e-257
Gcnt2	1.66708e-260	0.740897	0.325	0.052	3.1131e-256
Arhgef17	1.06396e-256	0.859658	0.369	0.071	1.98684e-252
Chn1	1.95919e-256	0.748535	0.25	0.031	3.6586e-252
Flna	3.49494e-256	1.73197	0.718	0.357	6.52645e-252
Rcan2	3.95748e-252	0.777607	0.327	0.054	7.3902e-248
Mical2	5.7125e-251	0.731013	0.331	0.057	1.06675e-246
Sort1	8.97214e-251	0.70694	0.325	0.055	1.67546e-246
Myl6	1.06867e-250	1.53922	0.92	0.758	1.99564e-246
mt-Atp6	2.25202e-250	1.51845	0.454	0.102	4.20543e-246
Ednra	2.02422e-248	0.781589	0.306	0.049	3.78002e-244
Tns1	1.72492e-247	1.12025	0.743	0.348	3.22111e-243
Id1	1.79381e-247	0.975346	0.596	0.183	3.34977e-243
mt-Nd4	1.07782e-246	1.31996	0.559	0.154	2.01271e-242
Mnd1	2.70827e-244	1.43631	0.299	0.049	5.05742e-240
Id4	1.42048e-243	1.20672	0.375	0.076	2.65261e-239
mt-Co3	5.23191e-242	1.55894	0.418	0.089	9.77006e-238
Amigo2	9.95425e-240	0.444155	0.202	0.02	1.85886e-235
Gm13889	1.42235e-237	1.01385	0.305	0.051	2.65611e-233
Trpv2	7.3163e-236	0.633985	0.244	0.031	1.36625e-231
Cbfa2t3	5.15729e-234	0.779742	0.385	0.079	9.63071e-230
Aspn	5.22334e-234	1.09059	0.821	0.402	9.75406e-230
Lbh	5.77552e-233	1.02132	0.464	0.124	1.07852e-228
mt-Cytb	4.69127e-231	1.40926	0.483	0.123	8.76048e-227
Lama5	1.68321e-228	0.523907	0.24	0.031	3.14323e-224
Ckb	1.35697e-227	1.37416	0.705	0.332	2.53401e-223
Ppp1r12c	1.96658e-227	0.918092	0.478	0.133	3.67239e-223
Pgf	2.63469e-221	0.497335	0.201	0.022	4.92002e-217
Igfbp7	9.91717e-220	0.921597	0.967	0.63	1.85193e-215
Apold1	2.0597e-219	0.775958	0.327	0.059	3.84629e-215
Rbpms	1.14582e-215	1.05709	0.769	0.423	2.1397e-211
Ndrg2	4.28526e-215	0.860039	0.596	0.206	8.00229e-211
Bcas3	2.38771e-213	0.757171	0.28	0.047	4.45881e-209
Gng11	1.16962e-208	1.10931	0.776	0.425	2.18414e-204
2022-09-04	6.20563e-206	1.47428	0.492	0.159	1.15884e-201
Stom	1.18957e-203	0.730082	0.343	0.073	2.22141e-199
mt-Co2	1.38518e-203	1.20903	0.45	0.114	2.58668e-199
Tm4sf1	8.90064e-203	0.894923	0.734	0.333	1.66211e-198
Rrad	6.15703e-201	1.11799	0.35	0.078	1.14976e-196
Nkd1	4.82911e-198	0.554369	0.203	0.025	9.01788e-194
Rcsd1	4.93122e-198	0.487513	0.245	0.036	9.20856e-194
Pde3a	1.29325e-195	0.903583	0.489	0.154	2.41502e-191
Kcnj8	1.92404e-195	2.04209	0.28	0.053	3.59296e-191
Sparcl1	3.38636e-193	1.07091	0.875	0.544	6.32369e-189
Atp2a2	4.66581e-191	1.1319	0.652	0.327	8.71294e-187
Stk38l	5.66019e-191	0.599548	0.266	0.047	1.05698e-186
Fam107b	4.48905e-189	0.591431	0.283	0.051	8.38285e-185
Tbx3	5.84009e-189	0.539541	0.255	0.042	1.09058e-184
Rassf3	6.89262e-188	0.642983	0.322	0.067	1.28713e-183
Tspan12	1.08786e-186	0.88029	0.404	0.111	2.03146e-182
Tspan15	5.84005e-185	0.735344	0.241	0.038	1.09057e-180
Malat1	1.13458e-183	0.837526	0.96	0.894	2.11871e-179
Fbxo32	8.54117e-182	0.644134	0.297	0.06	1.59498e-177
Actn4	1.94301e-180	0.950974	0.705	0.373	3.62839e-176
Filip1l	3.72354e-180	1.26875	0.642	0.316	6.95334e-176
Uba2	1.09661e-176	1.00576	0.568	0.241	2.04782e-172
Itpr1	2.30632e-176	0.864891	0.457	0.148	4.30682e-172
Rtn4rl1	3.82157e-176	0.739671	0.307	0.067	7.1364e-172
Oaz2	3.58423e-174	1.15261	0.664	0.352	6.6932e-170
Mtss1l	4.20064e-174	0.489806	0.223	0.035	7.84428e-170
Npy1r	2.77053e-172	0.589174	0.234	0.039	5.1737e-168
Abr	9.51725e-169	0.548763	0.283	0.057	1.77725e-164
Calm2	3.90718e-168	1.01144	0.845	0.644	7.29627e-164
Adcy6	1.48571e-164	0.727466	0.356	0.096	2.77442e-160
Tmem38b	2.19799e-164	0.71795	0.33	0.083	4.10452e-160
Abcc9	1.26504e-163	1.4912	0.312	0.075	2.36234e-159
Dstn	2.57906e-163	1.57973	0.768	0.569	4.81613e-159
Hrct1	1.09868e-156	0.888271	0.411	0.131	2.05167e-152
mt-Co1	1.05202e-155	0.914732	0.529	0.18	1.96455e-151
Plcl1	1.39029e-155	0.529649	0.222	0.039	2.59623e-151
Sipa1l2	1.48816e-155	0.403785	0.208	0.034	2.77899e-151
Ramp1	4.10698e-152	0.659464	0.294	0.066	7.66938e-148
2010111I01Rik	4.17433e-152	0.727221	0.412	0.129	7.79514e-148
Mgst3	4.59842e-152	0.955652	0.533	0.229	8.5871e-148
Hoxb3os	3.43133e-151	0.598261	0.244	0.048	6.40766e-147
Adap2	1.12999e-150	0.749231	0.24	0.048	2.11015e-146
Smarcd3	1.61914e-150	0.595177	0.26	0.055	3.02358e-146
Atp2b4	2.97977e-150	0.727758	0.426	0.138	5.56442e-146
Postn	5.96351e-148	0.863572	0.741	0.384	1.11363e-143
Nostrin	7.82433e-148	0.814121	0.205	0.036	1.46112e-143
Vcl	1.27195e-147	0.792172	0.517	0.211	2.37524e-143
Cystm1	1.09688e-144	0.785728	0.373	0.11	2.04831e-140
Ptger3	1.64507e-144	0.522092	0.201	0.035	3.07201e-140
Net1	7.47955e-144	0.506372	0.265	0.058	1.39673e-139
Jag1	1.19108e-143	0.676866	0.402	0.128	2.22423e-139
Rasal2	1.3027e-141	0.555194	0.291	0.07	2.43266e-137
Ldhb	1.68695e-141	1.07922	0.473	0.184	3.15021e-137
Bmp2	6.2204e-141	0.543332	0.255	0.055	1.1616e-136
Zfp467	1.73509e-139	0.613496	0.328	0.09	3.24011e-135
Inpp5a	2.97977e-139	0.632274	0.331	0.094	5.56443e-135
Actn1	9.76906e-139	0.95266	0.415	0.148	1.82427e-134
Rapgef5	2.06898e-138	0.391468	0.23	0.044	3.8636e-134
Synm	2.25898e-137	0.734609	0.291	0.073	4.21843e-133
Pde10a	2.06093e-135	0.86262	0.292	0.076	3.84858e-131
Phlda3	2.24084e-135	0.918902	0.589	0.294	4.18455e-131
Syne2	4.73176e-135	0.827271	0.524	0.225	8.83609e-131
Palld	3.10106e-134	1.149	0.539	0.268	5.79092e-130
Ggta1	6.15031e-134	0.450146	0.222	0.043	1.14851e-129
Vtn	1.23733e-130	1.13938	0.328	0.097	2.31059e-126
Epn2	1.33498e-129	0.745292	0.458	0.18	2.49295e-125
mt-Nd2	8.20326e-129	1.02599	0.337	0.094	1.53188e-124
Tnfaip8	2.89333e-128	0.682352	0.42	0.152	5.403e-124
Cog7	3.74405e-128	0.786331	0.311	0.089	6.99164e-124
mt-Nd1	3.59486e-127	0.909925	0.502	0.194	6.71304e-123
Snrk	4.94778e-126	0.761992	0.584	0.288	9.23948e-122
Arap2	6.98684e-126	0.512526	0.215	0.044	1.30472e-121
Ntn4	9.7756e-126	0.607537	0.317	0.088	1.8255e-121
Hip1	3.04192e-125	0.524518	0.333	0.097	5.68047e-121
Cox8a	2.63595e-124	0.835726	0.841	0.689	4.92237e-120
Itgb1	6.63289e-124	0.784064	0.805	0.631	1.23863e-119
Atp5b	8.51466e-124	0.803468	0.825	0.635	1.59003e-119
Lpp	2.09038e-122	0.942196	0.653	0.412	3.90357e-118
Spry4	1.89956e-121	0.632067	0.261	0.066	3.54723e-117
Rock1	2.50842e-120	0.869445	0.674	0.442	4.68422e-116
Plin4	3.32432e-120	0.535679	0.223	0.05	6.20784e-116
Fblim1	5.62311e-119	0.600582	0.259	0.067	1.05006e-114
Pcdh1	2.153e-118	0.524922	0.277	0.073	4.02051e-114
Camk2g	2.40242e-117	0.635642	0.363	0.124	4.48629e-113
Tln1	3.45341e-117	0.775599	0.674	0.426	6.44889e-113
Dock6	7.34742e-117	0.576971	0.236	0.055	1.37206e-112
2900026A02Rik	4.83615e-116	0.511447	0.293	0.081	9.03103e-112
Fads3	6.89341e-114	0.725909	0.356	0.125	1.28727e-109
mt-Nd5	8.69151e-114	0.727498	0.545	0.237	1.62305e-109
Ppp1cb	1.46355e-113	0.854487	0.637	0.395	2.73304e-109
Fermt2	2.1201e-113	0.807006	0.775	0.569	3.95907e-109
Nr2f2	4.63687e-112	0.626646	0.472	0.192	8.6589e-108
Cav1	3.02994e-111	0.634222	0.635	0.349	5.65812e-107
Adgrf5	6.12299e-111	0.644405	0.337	0.105	1.14341e-106
Slc11a1	9.90914e-111	0.673979	0.249	0.064	1.85043e-106
Pdgfb	7.83245e-110	0.334719	0.209	0.044	1.46263e-105
Ift43	6.00494e-108	0.731726	0.508	0.244	1.12136e-103
Adgrl1	1.08567e-107	0.476788	0.25	0.067	2.02739e-103
Crip1	1.9604e-107	1.27374	0.797	0.709	3.66085e-103
Trp53inp2	1.3143e-106	0.602655	0.294	0.091	2.45433e-102
Pde1a	1.52842e-105	0.499259	0.262	0.074	2.85418e-101
Cyp4b1	2.01721e-105	0.765825	0.283	0.083	3.76693e-101
Nhsl2	2.87147e-105	0.459415	0.25	0.066	5.36219e-101
Mast4	4.1143e-104	0.816057	0.523	0.27	7.68305e-100
Msrb3	1.15562e-102	0.524813	0.323	0.106	2.15801e-98
Unc45a	1.42633e-102	0.544734	0.311	0.101	2.66353e-98
Plekhg3	3.46836e-102	0.470201	0.208	0.049	6.47682e-98
Nab1	9.73217e-102	0.680654	0.451	0.204	1.81739e-97
Vstm4	3.80339e-100	0.857761	0.281	0.089	7.10244e-96
Crip2	3.82722e-100	0.611647	0.774	0.528	7.14696e-96
Lrrc32	6.51802e-100	0.44391	0.268	0.077	1.21718e-95
Aplp2	8.91495e-100	0.61059	0.77	0.589	1.66478e-95
2022-09-07	1.10073e-99	0.68623	0.829	0.669	2.05551e-95
Dgkh	1.44103e-99	0.50781	0.273	0.082	2.69099e-95
Mtus1	6.45835e-99	0.663472	0.321	0.11	1.20603e-94
mt-Nd3	2.39686e-98	0.585066	0.341	0.113	4.4759e-94
Ate1	2.4049e-98	0.640828	0.379	0.148	4.49091e-94
Actb	6.90536e-98	0.761247	0.743	0.515	1.28951e-93
Dab2ip	1.81957e-97	0.528213	0.368	0.138	3.39786e-93
Marveld1	2.36536e-97	0.674448	0.429	0.19	4.41706e-93
Pde5a	5.59484e-97	0.447769	0.201	0.048	1.04478e-92
Cnn2	1.14716e-96	0.671866	0.504	0.244	2.1422e-92
8430408G22Rik	5.59568e-96	0.344107	0.241	0.063	1.04494e-91
Prkar1a	1.45846e-95	0.68645	0.699	0.491	2.72352e-91
Dtx3	1.47787e-95	0.905838	0.407	0.177	2.75978e-91
Mob2	2.6069e-95	0.764367	0.416	0.186	4.86813e-91
Zfhx3	3.19895e-95	0.743134	0.529	0.288	5.97371e-91
Aldoa	5.29147e-95	0.732998	0.804	0.588	9.88129e-91
Pparg	5.48271e-94	0.702219	0.401	0.17	1.02384e-89
Ptms	7.91102e-94	0.630268	0.787	0.626	1.4773e-89
Atp5g3	1.63189e-93	0.686583	0.704	0.484	3.04739e-89
Cd36	1.95356e-93	0.433214	0.465	0.203	3.64807e-89
Enpep	2.12375e-93	0.803339	0.405	0.179	3.96589e-89
Hspa1a	3.73406e-92	0.914545	0.527	0.267	6.97299e-88
Ech1	4.0442e-92	0.718106	0.727	0.519	7.55214e-88
Slc12a2	8.19237e-92	0.291858	0.288	0.091	1.52984e-87
Cd93	7.23979e-91	0.364643	0.236	0.062	1.35196e-86
Lims2	2.79875e-90	0.578039	0.508	0.238	5.22639e-86
Pkp4	3.21819e-90	0.332897	0.235	0.064	6.00965e-86
Rhob	2.23491e-89	0.762579	0.687	0.45	4.17347e-85
Plcb4	3.11497e-89	0.598541	0.458	0.21	5.81689e-85
Cpe	8.54552e-89	0.760965	0.338	0.127	1.59579e-84
Slc4a3	1.13203e-87	0.482645	0.213	0.058	2.11395e-83
Col8a1	3.64192e-87	0.545438	0.262	0.081	6.80093e-83
Limd1	4.32871e-87	0.634128	0.484	0.245	8.08344e-83
Chchd10	4.7951e-87	0.697255	0.293	0.101	8.95437e-83
Atp5a1	1.86885e-86	0.613001	0.76	0.595	3.48989e-82
Fam162a	9.01585e-85	0.997426	0.613	0.395	1.68362e-80
Gnb4	1.45916e-84	0.749473	0.46	0.234	2.72484e-80
Gpcpd1	4.64224e-84	0.492176	0.267	0.087	8.66893e-80
Luzp1	5.86888e-84	0.642316	0.537	0.311	1.09596e-79
Ehd4	5.24561e-83	0.3299	0.376	0.152	9.79565e-79
Idh2	1.20797e-82	0.674985	0.54	0.305	2.25577e-78
Nr4a1	2.07271e-82	0.609813	0.541	0.291	3.87059e-78
Gm42418	4.73267e-82	0.50336	0.888	0.718	8.83779e-78
Nr4a2	3.25597e-80	0.522333	0.265	0.085	6.08021e-76
Vasp	5.56029e-80	0.779172	0.521	0.296	1.03833e-75
Plce1	3.30206e-79	0.52269	0.326	0.124	6.16627e-75
Entpd1	2.50325e-76	0.307659	0.204	0.056	4.67456e-72
Crispld2	1.04787e-75	0.836757	0.412	0.196	1.95679e-71
Mfhas1	1.24633e-75	0.475156	0.275	0.097	2.3274e-71
Mprip	1.52029e-75	0.628279	0.618	0.418	2.83898e-71
Txnip	1.34277e-74	0.511042	0.809	0.614	2.5075e-70
4930523C07Rik	3.86213e-74	0.625085	0.574	0.351	7.21214e-70
Jam3	6.46874e-73	0.673165	0.357	0.161	1.20797e-68
Rras	1.80114e-72	0.629601	0.631	0.461	3.36344e-68
Cryab	3.0121e-72	0.423431	0.542	0.313	5.62479e-68
Usp2	5.37092e-72	0.488432	0.242	0.081	1.00297e-67
Map1lc3a	6.26911e-71	0.604354	0.721	0.553	1.17069e-66
Myo1e	7.17397e-71	0.387321	0.239	0.078	1.33967e-66
Pls3	1.0033e-70	0.57613	0.51	0.296	1.87355e-66
4931406P16Rik	1.24891e-69	0.488664	0.343	0.147	2.33222e-65
Fez2	2.72864e-68	0.575882	0.452	0.24	5.09546e-64
Nudt4	3.07497e-68	0.635712	0.508	0.312	5.74219e-64
Klhdc8b	1.55574e-67	0.389636	0.207	0.065	2.90518e-63
Tgfb1i1	7.14952e-67	0.607682	0.505	0.303	1.3351e-62
Gamt	4.87288e-66	0.544852	0.324	0.139	9.09962e-62
mt-Nd4l	5.70194e-65	0.59293	0.575	0.346	1.06478e-60
Alpl	7.83541e-65	0.625748	0.246	0.091	1.46318e-60
Cd151	1.59625e-64	0.637448	0.594	0.4	2.98083e-60
Btg2	2.04134e-64	0.642238	0.763	0.654	3.81199e-60
Pbxip1	2.38441e-64	0.747729	0.508	0.325	4.45266e-60
Slc25a5	3.35983e-64	0.518433	0.668	0.445	6.27414e-60
Lamb2	1.05169e-63	0.573904	0.54	0.336	1.96393e-59
Stmn2	3.12333e-63	0.454165	0.213	0.068	5.83251e-59
Id3	6.77933e-63	0.603987	0.74	0.579	1.26597e-58
Syne1	5.20973e-62	0.458689	0.344	0.155	9.72865e-58
Plekho1	1.67919e-61	0.349687	0.205	0.065	3.13572e-57
Synpo	3.11813e-61	0.361425	0.22	0.076	5.82279e-57
H3f3b	3.80073e-61	0.423705	0.832	0.754	7.09749e-57
Ntf3	5.50047e-61	0.518798	0.278	0.112	1.02716e-56
Slc25a4	7.78978e-61	0.546016	0.837	0.738	1.45466e-56
Tusc5	1.2943e-60	0.552282	0.22	0.08	2.41697e-56
Afap1l2	1.52232e-60	0.39696	0.201	0.065	2.84278e-56
Btg1	1.68349e-60	0.41493	0.67	0.456	3.14376e-56
Enah	2.26118e-60	0.496235	0.283	0.119	4.22254e-56
Chchd2	4.12351e-60	0.486523	0.832	0.722	7.70024e-56
Epb41l1	4.27005e-60	0.47826	0.28	0.118	7.97388e-56
Pten	3.85153e-59	0.61063	0.564	0.38	7.19235e-55
Rab3a	5.69071e-59	0.443303	0.218	0.077	1.06268e-54
Notch1	8.0216e-59	0.488921	0.308	0.137	1.49795e-54
Utrn	1.38324e-58	0.54748	0.507	0.315	2.58305e-54
Sdhc	6.85343e-58	0.576714	0.507	0.324	1.27981e-53
Lims1	1.3085e-57	0.591726	0.565	0.383	2.4435e-53
Hes1	1.43938e-57	0.588409	0.444	0.248	2.68789e-53
Plxnd1	1.02535e-56	0.415174	0.257	0.104	1.91474e-52
BC028528	2.58728e-56	0.396819	0.227	0.085	4.8315e-52
AY036118	9.90622e-56	1.04861	0.642	0.489	1.84989e-51
Pear1	1.10682e-55	0.570299	0.26	0.11	2.06687e-51
Mapre2	1.2309e-55	0.537696	0.394	0.211	2.29859e-51
Pacsin3	1.31284e-55	0.687008	0.207	0.075	2.45161e-51
Selenow	2.74416e-54	0.573935	0.872	0.784	5.12445e-50
Slmap	9.66914e-54	0.587413	0.382	0.208	1.80562e-49
Coq10b	1.33221e-53	0.528196	0.492	0.3	2.48776e-49
Bzw2	4.11112e-53	0.621758	0.366	0.195	7.67711e-49
Ppp2r5a	5.34288e-53	0.472859	0.424	0.237	9.9773e-49
Tob2	5.71985e-53	0.531487	0.463	0.278	1.06813e-48
Asap2	7.24206e-53	0.455053	0.35	0.173	1.35238e-48
Map1b	4.78528e-52	0.661555	0.467	0.296	8.93603e-48
Cav2	1.40621e-51	0.254403	0.325	0.146	2.62595e-47
Cers4	1.54177e-51	0.43749	0.285	0.124	2.8791e-47
Agtr1a	1.74932e-51	0.89099	0.293	0.142	3.26668e-47
Lrrfip1	2.50034e-51	0.429854	0.384	0.204	4.66913e-47
Nbeal1	2.53142e-51	0.571573	0.484	0.301	4.72717e-47
Peli2	3.12776e-51	0.436599	0.272	0.118	5.84077e-47
Arhgef7	7.0929e-51	0.384433	0.238	0.096	1.32453e-46
Tmem245	1.37053e-50	0.428855	0.309	0.146	2.55933e-46
Suclg1	4.57025e-50	0.571948	0.533	0.361	8.53449e-46
Mafk	6.341e-50	0.341703	0.235	0.094	1.18412e-45
Mcur1	7.22511e-50	0.485349	0.336	0.17	1.34922e-45
Cd81	1.17952e-49	0.56325	0.89	0.758	2.20263e-45
Tprgl	1.96816e-49	0.50495	0.653	0.505	3.67533e-45
Ubc	2.74601e-49	0.497159	0.79	0.649	5.12791e-45
Dynll1	6.15483e-49	0.430943	0.835	0.73	1.14935e-44
Msn	1.58401e-48	0.527898	0.622	0.468	2.95798e-44
Nsmce4a	9.78867e-48	0.489731	0.475	0.297	1.82794e-43
Ets1	1.05684e-47	0.419993	0.344	0.172	1.97355e-43
Mef2a	2.04412e-47	0.449963	0.429	0.249	3.8172e-43
Cdc42ep3	8.38446e-47	0.341767	0.27	0.114	1.56571e-42
Atp1a2	3.08595e-46	0.462686	0.304	0.145	5.7627e-42
Fyco1	3.68362e-46	0.404462	0.256	0.114	6.87879e-42
Hspa2	4.28308e-46	0.333518	0.222	0.089	7.99823e-42
Cry2	6.12179e-46	0.3471	0.222	0.089	1.14318e-41
Cldn5	7.40615e-46	0.352299	0.234	0.093	1.38303e-41
Ctnna1	7.52249e-46	0.43125	0.55	0.376	1.40475e-41
Cavin1	1.54157e-45	0.518227	0.685	0.607	2.87874e-41
Pfkl	1.85491e-45	0.410448	0.292	0.142	3.46386e-41
Cox5a	2.34256e-45	0.472724	0.614	0.454	4.37449e-41
Ehd2	3.72576e-45	0.476359	0.553	0.398	6.95748e-41
Sh3bgrl	6.18529e-45	0.602755	0.545	0.398	1.15504e-40
Myh9	8.69879e-45	0.553323	0.479	0.314	1.62441e-40
Fam53b	1.77265e-44	0.357073	0.244	0.104	3.31025e-40
Mdh1	1.79099e-44	0.484732	0.573	0.409	3.34449e-40
Acadm	3.74172e-44	0.532216	0.436	0.273	6.98728e-40
Col18a1	3.59075e-43	0.512861	0.431	0.265	6.70537e-39
Flt1	3.96701e-43	0.333586	0.238	0.098	7.40799e-39
Ccdc107	4.15018e-43	0.537575	0.334	0.185	7.75004e-39
Ptma	4.64959e-43	0.351336	0.841	0.812	8.68265e-39
Crtc3	1.16333e-42	0.404347	0.383	0.215	2.1724e-38
Ndufs7	2.28157e-42	0.475154	0.621	0.475	4.26061e-38
Zc2hc1a	2.83115e-42	0.40318	0.315	0.163	5.28689e-38
Dock10	4.0013e-42	0.312644	0.221	0.091	7.47202e-38
Ubb	6.83081e-42	0.294372	0.874	0.827	1.27559e-37
Dbp	1.90158e-41	0.382335	0.474	0.285	3.55102e-37
Pkig	2.28693e-41	0.503203	0.445	0.288	4.27062e-37
Tpi1	2.52156e-41	0.535266	0.593	0.448	4.70876e-37
Pacsin2	1.43736e-40	0.392224	0.357	0.199	2.68413e-36
Ndufs2	2.6987e-40	0.507003	0.544	0.402	5.03956e-36
Wdr1	2.94206e-40	0.562095	0.469	0.325	5.494e-36
Adamts1	3.60737e-40	0.651486	0.577	0.449	6.73641e-36
Cds2	4.84575e-40	0.327931	0.252	0.117	9.04896e-36
Rock2	8.13904e-40	0.439521	0.656	0.531	1.51988e-35
Dnajb4	1.30883e-38	0.494191	0.337	0.188	2.4441e-34
Ebf1	1.83675e-38	0.356034	0.819	0.678	3.42995e-34
Hdac5	2.07065e-38	0.319969	0.231	0.104	3.86672e-34
Adgre5	2.20024e-38	0.406042	0.32	0.172	4.10874e-34
Esyt1	3.10478e-38	0.541033	0.399	0.248	5.79787e-34
Rsu1	9.14216e-38	0.503054	0.601	0.48	1.70721e-33
Rapgef2	1.59548e-37	0.382769	0.221	0.098	2.97941e-33
Fosb	2.35411e-37	0.48503	0.702	0.589	4.39607e-33
Cox7a2	2.4282e-37	0.465816	0.697	0.559	4.53443e-33
Efhd2	5.56226e-37	0.471157	0.327	0.183	1.0387e-32
Cyr61	6.08441e-37	0.587944	0.589	0.45	1.1362e-32
Pde4b	7.48112e-37	0.339867	0.209	0.092	1.39702e-32
Tubb4b	1.31382e-36	0.42639	0.599	0.447	2.45342e-32
Pck2	1.36534e-36	0.464393	0.331	0.191	2.54964e-32
Ptprb	1.55048e-36	0.545945	0.23	0.104	2.89537e-32
Hif1a	2.29951e-36	0.447428	0.386	0.238	4.29411e-32
Son	6.56932e-36	0.404569	0.754	0.667	1.22675e-31
Rflnb	1.37418e-35	0.454387	0.211	0.093	2.56613e-31
Plekhg2	1.44893e-35	0.415419	0.28	0.148	2.70574e-31
Zfp703	2.00358e-35	0.372761	0.291	0.154	3.74149e-31
Ccnd2	5.24719e-35	0.456535	0.55	0.407	9.79861e-31
St5	7.48085e-35	0.352702	0.237	0.114	1.39697e-30
Dusp3	1.47428e-34	0.393681	0.36	0.214	2.75307e-30
Cavin2	2.26967e-34	0.35474	0.453	0.309	4.23838e-30
Pdzd2	2.51892e-34	0.764724	0.317	0.181	4.70382e-30
Kif5b	4.00885e-34	0.401692	0.655	0.56	7.48613e-30
Bnip2	5.22157e-34	0.387393	0.48	0.343	9.75076e-30
Cdc42bpa	4.02709e-33	0.368428	0.332	0.19	7.52018e-29
Uqcr11	5.49696e-33	0.464152	0.609	0.477	1.0265e-28
2022-09-11	1.35081e-32	0.459815	0.504	0.368	2.5225e-28
Itpkb	1.72697e-32	0.273856	0.28	0.145	3.22495e-28
Ppp1r15a	2.73249e-32	0.525844	0.602	0.502	5.10266e-28
Arid5b	3.945e-32	0.36167	0.439	0.29	7.36688e-28
Rap1a	4.27981e-32	0.440623	0.65	0.543	7.99212e-28
Zfand5	5.18946e-32	0.433038	0.591	0.476	9.6908e-28
Stim1	6.28985e-32	0.364318	0.321	0.182	1.17457e-27
Sh2b3	6.32063e-32	0.422849	0.223	0.11	1.18032e-27
Mat2a	1.2662e-31	0.48651	0.66	0.549	2.3645e-27
Ctdspl	1.57435e-31	0.341562	0.238	0.12	2.93995e-27
Fam69a	3.5005e-31	0.323351	0.283	0.155	6.53683e-27
Vdac2	3.88636e-31	0.373154	0.596	0.472	7.25739e-27
Purb	1.0265e-30	0.400943	0.486	0.36	1.91689e-26
Tanc1	1.14808e-30	0.327535	0.258	0.135	2.14392e-26
Macf1	1.96705e-30	0.423879	0.538	0.416	3.67328e-26
Fzd4	5.49444e-30	0.393804	0.434	0.293	1.02603e-25
Timp3	8.61877e-30	0.286671	0.775	0.632	1.60947e-25
Cpeb4	1.04485e-29	0.322257	0.201	0.095	1.95115e-25
Ndufb9	1.25595e-29	0.430276	0.681	0.618	2.34536e-25
Camk1	1.68382e-29	0.411653	0.502	0.377	3.14437e-25
Arid5a	2.0499e-29	0.342356	0.289	0.164	3.82799e-25
Ywhaq	3.34831e-29	0.354511	0.674	0.587	6.25264e-25
Dusp1	4.07643e-29	0.348523	0.738	0.622	7.61232e-25
Uqcrb	4.14278e-29	0.398418	0.695	0.591	7.73623e-25
Ktn1	9.50914e-29	0.31969	0.405	0.264	1.77574e-24
Fam13c	1.02707e-28	0.253411	0.223	0.11	1.91795e-24
Atpif1	1.03616e-28	0.409708	0.661	0.552	1.93492e-24
Myadm	2.46399e-28	0.540919	0.52	0.395	4.60126e-24
Klf2	2.57281e-28	0.435803	0.632	0.534	4.80447e-24
Dhrs3	3.4189e-28	0.323586	0.305	0.178	6.38446e-24
Slc25a3	1.07962e-27	0.338882	0.709	0.652	2.01609e-23
Pdcd10	1.71801e-27	0.382538	0.453	0.326	3.20822e-23
Tspan3	1.90865e-27	0.405353	0.586	0.472	3.56421e-23
Hadhb	2.00764e-27	0.378851	0.445	0.315	3.74907e-23
Fos	7.2652e-27	0.38075	0.778	0.744	1.3567e-22
Gm26532	7.84606e-27	0.398269	0.273	0.155	1.46517e-22
Mical1	9.1374e-27	0.301307	0.214	0.11	1.70632e-22
Ubr1	1.5798e-26	0.407356	0.263	0.149	2.95013e-22
Slc38a2	1.66393e-26	0.457229	0.609	0.512	3.10723e-22
Eif4ebp2	2.0354e-26	0.348409	0.327	0.205	3.8009e-22
Emd	2.2926e-26	0.483014	0.361	0.243	4.28121e-22
Dlc1	3.5042e-26	0.461026	0.512	0.394	6.54375e-22
Ntrk2	4.13344e-26	0.331627	0.41	0.27	7.71879e-22
Ndufb7	5.02703e-26	0.396922	0.593	0.493	9.38748e-22
Picalm	1.78592e-25	0.339622	0.469	0.344	3.33504e-21
Uqcrc1	1.84093e-25	0.397134	0.513	0.391	3.43775e-21
Cyc1	3.95416e-25	0.392211	0.499	0.375	7.38401e-21
Ndufs5	4.46913e-25	0.369599	0.639	0.529	8.34566e-21
Map1a	4.57655e-25	0.319508	0.225	0.121	8.54625e-21
Pcdh18	9.27997e-25	0.385424	0.203	0.105	1.73294e-20
Prex2	9.91383e-25	0.325116	0.25	0.138	1.85131e-20
Gpi1	1.00846e-24	0.407196	0.509	0.405	1.8832e-20
Hnrnpl	1.05201e-24	0.379534	0.411	0.292	1.96453e-20
Baz2a	1.15242e-24	0.340948	0.223	0.12	2.15204e-20
Atp5d	1.39436e-24	0.332265	0.683	0.609	2.60383e-20
Pdlim5	1.74862e-24	0.315884	0.327	0.206	3.26538e-20
Mrps6	2.02305e-24	0.379058	0.306	0.193	3.77784e-20
Chd6	2.10166e-24	0.360699	0.358	0.236	3.92465e-20
mt-Atp8	2.10194e-24	0.273759	0.324	0.196	3.92516e-20
Pkm	2.22412e-24	0.403219	0.618	0.508	4.15332e-20
Steap4	2.54628e-24	0.810183	0.424	0.321	4.75493e-20
Dlg1	3.25551e-24	0.316072	0.223	0.119	6.07935e-20
Frmd4a	3.66704e-24	0.349847	0.301	0.185	6.84783e-20
Hcfc1r1	4.34548e-24	0.545361	0.574	0.487	8.11476e-20
Smim12	6.67375e-24	0.409737	0.275	0.168	1.24626e-19
Avpi1	8.42251e-24	0.271259	0.25	0.141	1.57282e-19
Adcy3	8.89071e-24	0.364455	0.21	0.114	1.66025e-19
Aco2	1.66713e-23	0.395427	0.385	0.274	3.1132e-19
Tmod3	1.7051e-23	0.440291	0.472	0.373	3.18411e-19
Hoxb4	1.7169e-23	0.324442	0.235	0.132	3.20615e-19
Mdh2	2.83354e-23	0.32315	0.603	0.493	5.29135e-19
Lrrc58	3.81873e-23	0.337975	0.511	0.402	7.13109e-19
Ehbp1l1	5.30606e-23	0.311482	0.254	0.147	9.90854e-19
Rab6b	9.07594e-23	0.269494	0.234	0.128	1.69484e-18
Hoxb2	9.74053e-23	0.380284	0.262	0.16	1.81895e-18
Nr1h3	2.69754e-22	0.69931	0.27	0.177	5.03739e-18
Msrb1	3.50918e-22	0.493048	0.395	0.298	6.55305e-18
Errfi1	6.45583e-22	0.403124	0.565	0.443	1.20556e-17
Arhgap5	6.9422e-22	0.359777	0.433	0.327	1.29639e-17
S100a1	9.77198e-22	0.368943	0.499	0.372	1.82482e-17
Pnisr	1.19561e-21	0.33975	0.482	0.368	2.23268e-17
Uqcr10	1.38128e-21	0.44434	0.587	0.492	2.57941e-17
Btbd7	1.73488e-21	0.320917	0.377	0.264	3.23971e-17
B230219D22Rik	2.0353e-21	0.343677	0.443	0.334	3.80072e-17
Dctn6	2.77089e-21	0.327536	0.347	0.238	5.17436e-17
Pla2g16	3.28201e-21	0.294414	0.421	0.304	6.12882e-17
Fosl2	3.32455e-21	0.2574	0.305	0.193	6.20826e-17
Cox6c	3.57206e-21	0.410369	0.707	0.645	6.67046e-17
Klhl24	3.72462e-21	0.333437	0.345	0.23	6.95535e-17
Cdc42ep4	3.88453e-21	0.37941	0.243	0.146	7.25397e-17
Mef2d	4.72016e-21	0.266483	0.273	0.166	8.81442e-17
Tacc2	6.80813e-21	0.265693	0.271	0.163	1.27135e-16
Ncor1	1.01878e-20	0.303339	0.645	0.573	1.90247e-16
Borcs7	1.46331e-20	0.359863	0.295	0.196	2.73259e-16
Ndufb6	2.0028e-20	0.384794	0.519	0.421	3.74004e-16
Csnk1e	2.23878e-20	0.416189	0.388	0.285	4.18071e-16
Idh3g	2.52735e-20	0.380148	0.396	0.294	4.71956e-16
Meis2	2.87212e-20	0.326377	0.264	0.165	5.3634e-16
Phldb2	5.05499e-20	0.412491	0.249	0.155	9.43968e-16
Ndufa12	6.79868e-20	0.356513	0.515	0.407	1.26959e-15
Slc6a6	9.47368e-20	0.3716	0.309	0.204	1.76912e-15
Ndufb10	9.99879e-20	0.313377	0.645	0.573	1.86717e-15
Fxyd1	1.49468e-19	0.287786	0.667	0.579	2.79116e-15
Rsbn1l	1.75114e-19	0.278183	0.372	0.262	3.27007e-15
Gna11	2.96136e-19	0.341343	0.44	0.346	5.53004e-15
Bace1	3.83106e-19	0.256279	0.219	0.126	7.15412e-15
Oxct1	4.69097e-19	0.403097	0.423	0.332	8.75992e-15
Ier5l	5.75654e-19	0.255482	0.284	0.185	1.07498e-14
Rgs3	6.64679e-19	0.262013	0.217	0.127	1.24122e-14
Ndufab1	9.14509e-19	0.343555	0.574	0.475	1.70775e-14
Dyrk2	1.21968e-18	0.295451	0.227	0.136	2.27764e-14
Cavin3	2.50145e-18	0.369725	0.699	0.665	4.6712e-14
Arhgap29	3.3934e-18	0.264322	0.428	0.32	6.33684e-14
Csrp2	3.51357e-18	0.378248	0.573	0.481	6.56124e-14
Zbtb38	4.07878e-18	0.273783	0.277	0.176	7.61672e-14
Esyt2	4.65302e-18	0.296902	0.415	0.31	8.68905e-14
Uqcrc2	5.58864e-18	0.356237	0.448	0.353	1.04362e-13
Ppp2r1a	6.34391e-18	0.398336	0.403	0.313	1.18466e-13
Eva1b	6.49701e-18	0.490679	0.508	0.412	1.21325e-13
Ranbp2	6.52631e-18	0.292679	0.313	0.211	1.21872e-13
Atf3	7.65808e-18	0.443125	0.504	0.414	1.43007e-13
Eif4a2	1.00445e-17	0.282824	0.638	0.543	1.87572e-13
Iscu	1.17406e-17	0.335897	0.507	0.416	2.19244e-13
Kif1c	1.30988e-17	0.274346	0.23	0.14	2.44607e-13
Idh3a	1.42803e-17	0.316037	0.311	0.216	2.6667e-13
Ttc28	1.81201e-17	0.282077	0.383	0.279	3.38374e-13
Mpc1	2.16062e-17	0.308068	0.55	0.47	4.03474e-13
Myo1c	2.59534e-17	0.2644	0.313	0.216	4.84655e-13
Atp5h	2.61762e-17	0.256843	0.751	0.704	4.88814e-13
Prkacb	3.14277e-17	0.260056	0.283	0.185	5.8688e-13
Sdha	4.20766e-17	0.358447	0.47	0.388	7.85739e-13
Pcm1	4.55215e-17	0.281378	0.365	0.267	8.50068e-13
Gm26802	5.17898e-17	0.428943	0.403	0.299	9.67122e-13
Smtn	6.24144e-17	0.368398	0.26	0.171	1.16553e-12
Tgfb1	6.38779e-17	0.253675	0.253	0.161	1.19286e-12
Tns2	6.63279e-17	0.306349	0.369	0.268	1.23861e-12
Jun	8.42744e-17	0.310335	0.75	0.714	1.57374e-12
Atp5c1	8.60732e-17	0.319336	0.669	0.618	1.60733e-12
Hnrnpa2b1	1.01453e-16	0.300209	0.73	0.68	1.89454e-12
Pik3ca	1.27162e-16	0.333453	0.301	0.207	2.37462e-12
Dag1	1.77403e-16	0.305644	0.505	0.419	3.31283e-12
Hebp1	1.82387e-16	0.389245	0.296	0.21	3.4059e-12
Gnaq	2.41251e-16	0.263055	0.337	0.24	4.50512e-12
Iqgap1	2.66538e-16	0.321922	0.544	0.475	4.97733e-12
Cited2	2.80712e-16	0.404299	0.431	0.339	5.24201e-12
Pja2	2.81324e-16	0.279485	0.373	0.279	5.25344e-12
Pnkd	3.09092e-16	0.323742	0.415	0.326	5.77198e-12
2022-09-08	3.21725e-16	0.345797	0.43	0.344	6.0079e-12
Arhgef25	3.27936e-16	0.354929	0.294	0.205	6.12388e-12
Ndufa5	4.8603e-16	0.344899	0.503	0.42	9.07613e-12
Cldn15	5.20404e-16	0.381584	0.225	0.143	9.71803e-12
Ehd1	6.86047e-16	0.292477	0.455	0.365	1.28112e-11
Dst	7.21393e-16	0.297675	0.49	0.405	1.34713e-11
Pdcl3	7.29761e-16	0.349315	0.427	0.346	1.36276e-11
Zfp36	8.85172e-16	0.27673	0.585	0.494	1.65297e-11
Uqcrfs1	1.04662e-15	0.283001	0.498	0.408	1.95445e-11
Cycs	1.18046e-15	0.294892	0.393	0.299	2.20439e-11
Nub1	1.2653e-15	0.264688	0.235	0.148	2.36282e-11
Isyna1	1.3914e-15	0.253228	0.21	0.129	2.59831e-11
Cacna2d1	1.4706e-15	0.29644	0.295	0.206	2.74619e-11
Nr1d2	2.85414e-15	0.250751	0.285	0.191	5.32982e-11
Clic4	3.2213e-15	0.317816	0.551	0.492	6.01546e-11
Tob1	3.82065e-15	0.256353	0.312	0.216	7.13468e-11
Snx18	5.24502e-15	0.313176	0.389	0.297	9.79455e-11
Gipc1	6.90064e-15	0.360352	0.286	0.204	1.28863e-10
Tmem109	8.57561e-15	0.281962	0.394	0.303	1.60141e-10
Tnfaip1	1.05575e-14	0.316483	0.327	0.242	1.9715e-10
Pfkp	1.08665e-14	0.64539	0.345	0.267	2.02921e-10
Arhgdib	1.23752e-14	0.546966	0.224	0.144	2.31095e-10
Pttg1	1.25e-14	0.263201	0.405	0.316	2.33425e-10
Cox7c	1.36193e-14	0.325325	0.685	0.61	2.54328e-10
Map7d1	1.68236e-14	0.306547	0.376	0.292	3.14164e-10
Top2b	1.79705e-14	0.27979	0.437	0.347	3.35581e-10
Fbxo9	3.12509e-14	0.288972	0.251	0.17	5.83579e-10
Slc9a3r2	3.20942e-14	0.301525	0.35	0.272	5.99327e-10
Mbnl2	4.62951e-14	0.287959	0.563	0.498	8.64515e-10
Cox5b	7.34502e-14	0.290167	0.575	0.498	1.37161e-09
Ptpn9	1.1108e-13	0.30651	0.209	0.135	2.07431e-09
Wdfy3	1.20232e-13	0.326782	0.204	0.129	2.24521e-09
Strn3	1.23876e-13	0.267927	0.442	0.356	2.31327e-09
Hadha	1.27578e-13	0.304216	0.37	0.291	2.38239e-09
Srrm2	2.1811e-13	0.26438	0.724	0.692	4.07299e-09
Dnajc8	2.60889e-13	0.319487	0.471	0.402	4.87184e-09
Ndufv1	5.34422e-13	0.307117	0.392	0.317	9.97979e-09
Ndufs8	6.08305e-13	0.330068	0.411	0.335	1.13595e-08
Ndufb8	7.16983e-13	0.275733	0.551	0.474	1.33889e-08
Cox6a1	7.81357e-13	0.338858	0.672	0.6	1.45911e-08
Bcl9l	1.1564e-12	0.263976	0.249	0.172	2.15945e-08
Dynlt3	1.33082e-12	0.255535	0.402	0.323	2.48518e-08
Uqcrq	1.53726e-12	0.253806	0.554	0.465	2.87068e-08
Ptk2	4.89701e-12	0.34744	0.235	0.162	9.14468e-08
Cs	5.54078e-12	0.309437	0.309	0.236	1.03469e-07
Cbx6	5.9605e-12	0.305086	0.347	0.269	1.11306e-07
Vamp5	7.79711e-12	0.26245	0.256	0.182	1.45603e-07
Tmx4	9.0443e-12	0.254773	0.201	0.132	1.68893e-07
Map4	1.68575e-11	0.27865	0.367	0.295	3.14796e-07
1700020I14Rik	1.92222e-11	0.259664	0.409	0.341	3.58955e-07
Ppp2r2a	2.17763e-11	0.275447	0.385	0.315	4.06651e-07
Il15ra	2.93435e-11	0.303227	0.208	0.141	5.4796e-07
Nfe2l1	5.38442e-11	0.26518	0.357	0.289	1.00549e-06
Herc1	5.58906e-11	0.308059	0.291	0.217	1.0437e-06
Rnf11	5.81127e-11	0.254683	0.367	0.302	1.0852e-06
Pdlim1	6.12408e-11	0.365067	0.354	0.284	1.14361e-06
Syf2	6.80083e-11	0.262482	0.446	0.38	1.26999e-06
Idh3b	7.12039e-11	0.283108	0.348	0.281	1.32966e-06
Ndufv2	1.1267e-10	0.258287	0.496	0.432	2.104e-06
Igf2r	1.32907e-10	0.362527	0.351	0.286	2.4819e-06
Cd2ap	1.47541e-10	0.335218	0.343	0.279	2.75518e-06
Atrx	1.6249e-10	0.252189	0.55	0.504	3.03433e-06
Raph1	1.8517e-10	0.411613	0.301	0.231	3.45787e-06
Acaa2	1.92813e-10	0.278169	0.485	0.425	3.60058e-06
Psmb5	3.49174e-10	0.250911	0.551	0.479	6.52048e-06
Ube3a	3.97184e-10	0.28584	0.466	0.41	7.41701e-06
Fam174a	5.0151e-10	0.331715	0.337	0.276	9.3652e-06
Tril	1.2234e-09	0.257987	0.216	0.154	2.28458e-05
Tnks1bp1	1.55367e-09	0.251319	0.273	0.206	2.90133e-05
Ndufs3	1.68494e-09	0.269211	0.45	0.39	3.14645e-05
Ndufa11	6.09224e-09	0.272699	0.54	0.492	0.000113766
Gapdh	6.76502e-09	0.253073	0.48	0.412	0.00012633
Ralb	7.1552e-09	0.306201	0.274	0.217	0.000133616
Ndufa10	7.22201e-09	0.269502	0.402	0.342	0.000134864
Sdhb	1.12992e-08	0.2543	0.501	0.447	0.000211001
Zeb2	1.13852e-08	0.259129	0.561	0.51	0.000212608
Cpne2	1.22793e-08	0.262658	0.219	0.161	0.000229304
Igfbp3	1.61147e-08	0.64999	0.218	0.157	0.000300925
Ogdh	1.66101e-08	0.258408	0.308	0.249	0.000310177
Pkd1	1.20026e-07	0.253475	0.241	0.183	0.00224136
Sh3glb2	1.34712e-07	0.264134	0.244	0.19	0.00251562
Fh1	1.42795e-07	0.259929	0.267	0.213	0.00266655
Blvra	1.80063e-07	0.254423	0.237	0.188	0.0033625
Pold4	2.49803e-07	0.309431	0.302	0.255	0.00466483
Pdlim7	3.22207e-07	0.273216	0.322	0.275	0.0060169
Clstn1	3.51891e-07	0.264389	0.309	0.253	0.0065712
2022-09-09	4.18206e-07	0.255028	0.222	0.172	0.00780957
Sucla2	9.24683e-07	0.260843	0.287	0.24	0.0172675
Thbs1	1.12372e-06	0.264807	0.272	0.215	0.0209843
Ndufs6	1.18989e-06	0.250224	0.513	0.473	0.0222199
Dld	3.78178e-06	0.252602	0.275	0.231	0.0706209
Araf	1.19092e-05	0.264478	0.227	0.185	0.222392
Eps8	5.09207e-05	0.480218	0.248	0.22	0.950893
Pon2	6.79326e-05	0.305973	0.325	0.296	1
Cisd1	6.92288e-05	0.264562	0.312	0.28	1
Josd2	0.000100653	0.27209	0.295	0.267	1
Ndufb2	0.000124979	0.287266	0.385	0.357	1
Gpsm3	0.000128576	0.407242	0.271	0.248	1
Cisd3	0.000490986	0.281461	0.212	0.185	1
Angptl2	0.00332282	0.697346	0.402	0.424	1
Sipa1	0.00529295	0.303573	0.207	0.186	1
Smpdl3a	0.0404976	0.301128	0.353	0.352	1
Meg3	0.152863	0.57332	0.524	0.557	1
Phlda1	0.430742	0.298721	0.387	0.434	1
Gpx8	0.477446	0.519126	0.452	0.512	1
Gas1	0.549849	0.493449	0.364	0.403	1
Coro1b	0.966722	0.27463	0.275	0.304	1

## Sheet: Immune
	p_val	avg_logFC	pct.1	pct.2	p_val_adj
Ccl5	0	3.87669	0.333	0.036	0
Rgs2	0	3.09541	0.737	0.073	0
Cd52	0	2.96143	0.782	0.009	0
Coro1a	0	2.54544	0.786	0.01	0
Nkg7	0	2.5176	0.314	0.005	0
Tnfaip3	0	2.45833	0.645	0.055	0
Emb	0	2.45512	0.621	0.082	0
Trbc2	0	2.43276	0.572	0.006	0
Rgs1	0	2.42525	0.439	0.008	0
Ltb	0	2.34284	0.573	0.005	0
Areg	0	2.27886	0.29	0.009	0
Ptprc	0	2.255	0.645	0.004	0
Rac2	0	2.25382	0.68	0.006	0
Ctla2a	0	2.1787	0.54	0.079	0
Ptprcap	0	2.17315	0.607	0.005	0
Laptm5	0	2.1531	0.667	0.007	0
Srgn	0	2.13733	0.84	0.17	0
Cd3g	0	2.13405	0.37	0.003	0
Fcer1g	0	2.12235	0.316	0.013	0
Il7r	0	2.11886	0.506	0.003	0
Dennd4a	0	2.03579	0.585	0.058	0
Klrk1	0	2.00464	0.301	0.003	0
Cd69	0	1.97482	0.422	0.003	0
Pim1	0	1.95132	0.625	0.198	0
Ptpn18	0	1.92023	0.636	0.045	0
Il2rg	0	1.89784	0.524	0.022	0
Cd53	0	1.87195	0.536	0.004	0
Ccr2	0	1.86975	0.421	0.002	0
Selplg	0	1.84112	0.553	0.014	0
Vps37b	0	1.84042	0.477	0.05	0
Hcst	0	1.8381	0.461	0.003	0
Ms4a4b	0	1.82714	0.3	0.009	0
Tmsb4x	0	1.77609	0.969	0.688	0
Cxcr6	0	1.7724	0.392	0.002	0
Gmfg	0	1.75879	0.54	0.02	0
Samsn1	0	1.74809	0.457	0.004	0
Stk17b	0	1.73689	0.53	0.046	0
Cd7	0	1.73366	0.232	0.003	0
Trbc1	0	1.73042	0.352	0.002	0
Sh3bgrl3	0	1.72383	0.892	0.51	0
Itk	0	1.71108	0.386	0.002	0
Gimap3	0	1.66292	0.415	0.002	0
Lcp1	0	1.65426	0.471	0.022	0
Skap1	0	1.64797	0.448	0.003	0
Tyrobp	0	1.63353	0.205	0.005	0
Arhgdib	0	1.62954	0.654	0.12	0
Neurl3	0	1.62213	0.36	0.01	0
Cd3d	0	1.59081	0.274	0.002	0
Epsti1	0	1.58486	0.27	0.015	0
Arg1	0	1.55906	0.256	0.012	0
Gata3	0	1.5438	0.385	0.051	0
Nfkbid	0	1.5278	0.326	0.005	0
Dusp5	0	1.4969	0.407	0.064	0
Gimap6	0	1.49051	0.459	0.087	0
Itgb7	0	1.48017	0.452	0.04	0
Fyb	0	1.47177	0.384	0.018	0
Il1rl1	0	1.44948	0.272	0.005	0
Cd37	0	1.44677	0.387	0.005	0
Tespa1	0	1.40633	0.344	0.004	0
Traf1	0	1.39821	0.331	0.015	0
Arhgap45	0	1.38629	0.381	0.016	0
2022-09-01	0	1.38505	0.408	0.046	0
Cytip	0	1.36912	0.37	0.013	0
Dock2	0	1.36817	0.357	0.003	0
Il2rb	0	1.36221	0.256	0.002	0
Ptpn22	0	1.34516	0.225	0.003	0
Lat	0	1.34467	0.328	0.004	0
Tnfrsf18	0	1.33843	0.322	0.007	0
Slc38a1	0	1.3288	0.345	0.019	0
Gpr183	0	1.29224	0.263	0.002	0
Cd48	0	1.27652	0.287	0.003	0
Ltb4r1	0	1.24714	0.263	0.003	0
Fam107b	0	1.21628	0.367	0.046	0
Gimap1	0	1.19638	0.353	0.039	0
Bcl11b	0	1.19088	0.261	0.001	0
Arhgap30	0	1.16556	0.312	0.003	0
Dok2	0	1.16071	0.281	0.003	0
St8sia4	0	1.12955	0.313	0.018	0
Ikzf1	0	1.08883	0.286	0.003	0
Gpr132	0	1.08604	0.279	0.002	0
Itga4	0	1.08409	0.244	0.008	0
Cd27	0	1.07725	0.236	0.012	0
Ikzf3	0	1.07681	0.211	0	0
Lck	0	1.07352	0.206	0.008	0
Il2ra	0	1.0558	0.204	0.011	0
Arhgap15	0	1.05424	0.296	0.021	0
Lcp2	0	1.04268	0.23	0.002	0
Rhoh	0	1.03942	0.232	0.002	0
Hcls1	0	1.02384	0.28	0.009	0
Itgb2	0	1.02165	0.245	0.003	0
Cyth4	0	1.00623	0.252	0.003	0
Tbc1d10c	0	1.00524	0.24	0.002	0
Gpr171	0	0.997072	0.213	0.002	0
Fermt3	0	0.996837	0.221	0.006	0
Gimap5	0	0.96087	0.247	0.023	0
Pstpip1	0	0.953497	0.232	0.004	0
Sla	0	0.947664	0.223	0.002	0
Tspan32	0	0.929175	0.212	0.005	0
Spn	0	0.915425	0.203	0.002	0
Rasal3	0	0.913824	0.213	0.002	0
Arhgap9	0	0.902094	0.213	0.003	0
P2ry10	0	0.881023	0.212	0.002	0
Glipr1	0	0.845475	0.204	0.002	0
Ptpn7	0	0.839901	0.202	0.002	0
Snx20	0	0.824572	0.212	0.004	0
Gimap4	7.88859e-308	1.52781	0.312	0.041	1.47312e-303
Ets1	1.11528e-298	1.51039	0.561	0.159	2.08267e-294
H2-Q7	2.11958e-294	1.58878	0.655	0.232	3.9581e-290
Fxyd5	1.04371e-287	1.53641	0.741	0.346	1.94902e-283
Rinl	1.60801e-282	0.849996	0.203	0.017	3.0028e-278
Btg1	2.03331e-269	1.7457	0.791	0.45	3.79701e-265
Fam105a	1.10894e-268	0.810157	0.204	0.018	2.07083e-264
Rcsd1	1.58274e-265	0.946721	0.272	0.035	2.95562e-261
Inpp4b	1.96234e-264	1.06057	0.247	0.028	3.66448e-260
S100a4	1.65852e-244	1.45571	0.507	0.148	3.09713e-240
H2-D1	5.76178e-244	1.09224	0.936	0.747	1.07595e-239
Lpcat2	2.35181e-240	0.950731	0.205	0.021	4.39177e-236
Rgcc	2.8209e-227	1.78486	0.52	0.158	5.26775e-223
Junb	4.40809e-226	1.57737	0.882	0.66	8.23166e-222
Ramp1	5.58482e-226	1.14688	0.334	0.064	1.04291e-221
B4galnt1	4.87326e-222	1.01871	0.304	0.055	9.10033e-218
H2-K1	3.2522e-219	1.25844	0.867	0.645	6.07317e-215
Cd82	1.754e-218	1.28697	0.403	0.101	3.27542e-214
Sub1	7.99804e-214	1.43109	0.772	0.5	1.49355e-209
Nabp1	2.44854e-213	1.3124	0.362	0.082	4.5724e-209
Pfn1	5.42276e-210	1.2271	0.87	0.677	1.01265e-205
Ccdc88c	1.06363e-209	0.922425	0.248	0.037	1.98622e-205
Ikzf2	6.82278e-202	1.16205	0.251	0.04	1.27409e-197
Prex1	2.6357e-192	0.889084	0.234	0.036	4.92191e-188
Fau	7.84792e-182	0.852502	0.904	0.829	1.46552e-177
Ddx5	2.31913e-180	1.1201	0.887	0.766	4.33074e-176
Csrnp1	3.09319e-180	1.25757	0.386	0.109	5.77622e-176
Limd2	4.5463e-178	1.27273	0.449	0.154	8.48977e-174
Shisa5	7.75685e-178	1.42547	0.741	0.52	1.44851e-173
Dock10	1.08753e-176	1.04518	0.34	0.084	2.03085e-172
Hmgb2	1.55503e-175	1.26847	0.565	0.239	2.90386e-171
Ankrd44	1.78538e-174	1.04399	0.347	0.089	3.33401e-170
Ucp2	2.29532e-170	1.03523	0.401	0.12	4.28628e-166
Nr4a3	1.24531e-167	0.913113	0.219	0.036	2.32549e-163
Cotl1	1.49516e-164	1.30426	0.576	0.278	2.79206e-160
Zfp36l2	8.31848e-158	1.47463	0.712	0.493	1.55339e-153
Unc119	4.57886e-155	0.749658	0.213	0.037	8.55057e-151
Id2	4.41033e-153	1.5652	0.627	0.357	8.23584e-149
Pnrc1	3.45485e-139	1.14247	0.77	0.573	6.4516e-135
Apobec3	4.1837e-138	1.02279	0.424	0.156	7.81265e-134
Evl	3.42966e-133	1.03151	0.293	0.08	6.40454e-129
H3f3b	2.03741e-127	0.922896	0.872	0.751	3.80466e-123
Actr3	4.77623e-124	1.07335	0.664	0.477	8.91912e-120
Chd7	4.06648e-122	0.790157	0.222	0.049	7.59374e-118
Fam49b	1.48148e-120	0.896206	0.303	0.091	2.76651e-116
Jund	8.4219e-119	0.911751	0.897	0.798	1.57271e-114
Ezr	8.48063e-119	0.882359	0.304	0.09	1.58367e-114
Grap	1.17256e-118	0.756066	0.202	0.042	2.18965e-114
H2-Q6	5.70606e-117	0.985148	0.34	0.116	1.06555e-112
Gng2	3.67608e-112	0.836292	0.257	0.07	6.86471e-108
Tuba4a	7.15168e-112	0.846533	0.23	0.056	1.33551e-107
Rps24	9.7788e-107	0.597666	0.922	0.863	1.82609e-102
Cnn2	3.84665e-106	1.03218	0.485	0.246	7.18323e-102
Rps11	1.10288e-104	0.657741	0.884	0.861	2.05952e-100
Pde7a	2.86756e-104	0.897519	0.246	0.069	5.35489e-100
Nr4a1	1.69389e-103	1.39725	0.527	0.292	3.16316e-99
Tgfb1	3.1811e-102	1.06527	0.374	0.154	5.94038e-98
Rps16	3.33023e-102	0.595651	0.908	0.875	6.21888e-98
Itpkb	5.6136e-101	0.982319	0.362	0.141	1.04828e-96
Rpl19	8.88456e-101	0.601984	0.902	0.861	1.6591e-96
Tes	5.4339e-100	0.743696	0.207	0.05	1.01473e-95
Cyba	5.71832e-99	0.937058	0.71	0.567	1.06784e-94
Tspan13	9.04207e-99	0.637419	0.344	0.117	1.68852e-94
Klf6	1.1436e-98	1.12057	0.786	0.654	2.13555e-94
Rbm39	8.39911e-97	0.746799	0.844	0.774	1.56845e-92
Fli1	1.86624e-96	0.714406	0.235	0.064	3.48501e-92
Furin	1.9027e-94	1.43661	0.363	0.158	3.5531e-90
Rps13	5.28582e-93	0.610763	0.883	0.833	9.87074e-89
D16Ertd472e	6.05365e-91	0.878989	0.236	0.07	1.13046e-86
Bcl2	6.45549e-89	1.19859	0.315	0.122	1.2055e-84
Nr4a2	8.90243e-88	1.03861	0.264	0.086	1.66244e-83
Gadd45b	1.79021e-87	1.61057	0.534	0.357	3.34304e-83
Nfkbia	3.58781e-86	1.71217	0.715	0.615	6.69988e-82
Psmb8	1.28997e-85	0.891938	0.643	0.473	2.40889e-81
B2m	2.63619e-85	0.706158	0.87	0.756	4.92282e-81
Btg2	9.19267e-85	0.902242	0.797	0.652	1.71664e-80
Tagln2	1.09126e-83	0.84395	0.699	0.505	2.03781e-79
Lrrfip1	7.90216e-83	0.930071	0.404	0.203	1.47565e-78
Hspa8	2.82937e-82	0.803154	0.81	0.715	5.28357e-78
2022-09-06	4.70475e-77	0.813352	0.241	0.082	8.78564e-73
Tsc22d3	2.41108e-76	1.00777	0.518	0.32	4.50245e-72
Arpc2	6.01466e-75	0.756127	0.741	0.644	1.12318e-70
Crem	1.78192e-73	1.03735	0.274	0.107	3.32755e-69
Dnaja1	3.86962e-73	1.09245	0.743	0.655	7.22612e-69
Elf1	1.28708e-72	1.04339	0.488	0.317	2.40349e-68
Pitpnc1	1.67016e-72	0.753712	0.254	0.091	3.11885e-68
Zc3hav1	5.02834e-72	1.10087	0.414	0.232	9.38992e-68
Cdc42ep3	3.06613e-71	0.735792	0.289	0.113	5.72569e-67
Stk4	8.0758e-71	0.695298	0.211	0.068	1.50808e-66
Sik1	2.04887e-70	0.739297	0.246	0.089	3.82607e-66
Rps14	4.34503e-70	0.446771	0.908	0.893	8.11391e-66
Crlf3	3.38678e-69	0.828185	0.257	0.096	6.32448e-65
Ier5	2.29969e-67	0.976888	0.527	0.346	4.29444e-63
Nfkb1	3.25155e-65	1.30392	0.459	0.299	6.07194e-61
Lsp1	7.4935e-65	1.05304	0.528	0.37	1.39934e-60
AW112010	8.01083e-65	1.0668	0.533	0.333	1.49594e-60
Nrip1	1.12017e-63	1.16826	0.487	0.329	2.0918e-59
Slfn2	1.80131e-63	0.880692	0.291	0.127	3.36377e-59
Serinc3	2.65822e-63	0.840848	0.623	0.5	4.96396e-59
Fosl2	1.00519e-62	0.997674	0.361	0.19	1.87709e-58
Clic1	1.90318e-61	0.694964	0.709	0.618	3.554e-57
Stk24	5.98287e-61	0.924687	0.394	0.228	1.11724e-56
Baz1a	1.66167e-59	0.821977	0.32	0.157	3.103e-55
Arpc3	3.99994e-59	0.737982	0.659	0.585	7.46949e-55
Slc9a3r1	4.1723e-59	0.663832	0.241	0.096	7.79136e-55
Rpl18a	2.36134e-58	0.453635	0.897	0.868	4.40956e-54
Samhd1	1.59156e-57	0.970371	0.435	0.273	2.97207e-53
Adgre5	3.29787e-57	0.868103	0.332	0.172	6.15844e-53
Vasp	8.40233e-57	0.873339	0.453	0.3	1.56905e-52
Gpsm3	5.67623e-56	0.837597	0.399	0.241	1.05998e-51
Srsf5	5.77876e-56	0.738772	0.722	0.637	1.07913e-51
Mbnl1	6.85148e-55	0.787884	0.589	0.492	1.27945e-50
Hnrnpf	1.08657e-53	0.688904	0.671	0.589	2.02907e-49
Rps7	9.78165e-53	0.50495	0.85	0.821	1.82662e-48
Tmem64	1.02457e-50	0.755603	0.225	0.093	1.91329e-46
Rps3	1.66114e-48	0.408169	0.878	0.857	3.102e-44
4930523C07Rik	1.52564e-47	0.818498	0.486	0.356	2.84898e-43
Ahcyl2	5.71775e-47	0.694693	0.203	0.082	1.06773e-42
Rps15a	1.83029e-46	0.416512	0.875	0.851	3.41788e-42
Tnfaip8	4.79182e-46	0.770501	0.302	0.159	8.94825e-42
Lbr	1.51466e-45	0.677363	0.23	0.101	2.82847e-41
Ier2	1.95799e-45	0.73773	0.694	0.557	3.65635e-41
Rpl18	3.40811e-45	0.474001	0.83	0.83	6.3643e-41
Rplp2	1.42988e-44	0.505503	0.813	0.745	2.67016e-40
Rps10	6.23946e-44	0.488027	0.857	0.83	1.16516e-39
Rpl8	6.75854e-44	0.468512	0.836	0.85	1.26209e-39
Rpsa	1.67122e-43	0.556317	0.821	0.803	3.12083e-39
Sec11c	1.8142e-43	0.825811	0.423	0.294	3.38784e-39
Saraf	1.27965e-42	0.797268	0.542	0.455	2.38962e-38
Ccnd2	1.41038e-42	0.73762	0.53	0.408	2.63375e-38
Cnot6l	2.10061e-42	0.872576	0.345	0.211	3.92268e-38
Ankrd11	2.40013e-42	0.724741	0.57	0.501	4.482e-38
Grk2	5.82382e-42	0.631807	0.211	0.092	1.08754e-37
Isy1	8.95914e-41	0.858701	0.263	0.136	1.67303e-36
Eif1	1.07612e-40	0.398209	0.876	0.885	2.00955e-36
Tecpr1	3.4527e-40	0.749328	0.244	0.121	6.44758e-36
Rpl32	4.0328e-39	0.390196	0.874	0.854	7.53085e-35
Rpl12	1.37974e-36	0.573859	0.819	0.792	2.57652e-32
Rapgef6	2.29632e-36	0.733256	0.294	0.17	4.28814e-32
Serpinb1a	8.65974e-36	1.04238	0.226	0.113	1.61712e-31
Rpl17	7.18444e-35	0.382978	0.871	0.854	1.34162e-30
Peli1	9.61926e-35	0.756341	0.307	0.187	1.7963e-30
Cdc42se2	6.64353e-34	0.642002	0.254	0.138	1.24061e-29
Fnbp1	1.6592e-33	0.604779	0.221	0.111	3.0984e-29
Ppp1r15a	3.80372e-33	0.692982	0.589	0.503	7.10307e-29
Iqgap1	4.10281e-33	0.732927	0.531	0.476	7.66158e-29
Pkn1	2.42103e-32	0.566498	0.225	0.115	4.52104e-28
Fosb	2.91127e-32	0.937843	0.655	0.592	5.43651e-28
Hilpda	6.36439e-32	1.30665	0.286	0.176	1.18849e-27
Csk	1.78832e-31	0.697607	0.277	0.165	3.33952e-27
Rbm3	2.70091e-30	0.588809	0.665	0.634	5.04368e-26
Ppp1r12a	2.99042e-30	0.583581	0.467	0.374	5.58431e-26
H2afz	3.723e-30	0.582499	0.558	0.454	6.95233e-26
Ncor1	2.84582e-29	0.642525	0.592	0.576	5.31428e-25
Uhrf2	2.87323e-29	1.13389	0.386	0.293	5.36547e-25
Ly6e	7.15209e-29	0.518017	0.678	0.589	1.33558e-24
Dusp1	7.99921e-29	0.646159	0.696	0.624	1.49377e-24
Rplp1	8.74985e-29	0.450684	0.808	0.78	1.63395e-24
Capzb	1.16734e-28	0.636854	0.591	0.567	2.17989e-24
Ppp1r18	1.41025e-28	0.651028	0.271	0.164	2.63349e-24
Rps9	2.66183e-28	0.38272	0.81	0.84	4.9707e-24
Atp2b1	3.30366e-28	0.693521	0.542	0.514	6.16926e-24
Chd2	4.63418e-28	0.771439	0.322	0.22	8.65387e-24
Cfl1	1.10785e-27	0.525801	0.728	0.713	2.06881e-23
Ncl	9.63444e-27	0.548445	0.644	0.599	1.79914e-22
Msn	1.33191e-26	0.599866	0.521	0.474	2.48721e-22
Actb	1.85208e-26	0.919141	0.58	0.525	3.45858e-22
Akap13	3.57713e-26	0.668793	0.491	0.43	6.67993e-22
Rps6	3.88698e-26	0.334893	0.858	0.863	7.25854e-22
Tob2	9.94462e-26	0.753916	0.374	0.284	1.85706e-21
Ifngr1	1.43981e-25	0.799261	0.554	0.528	2.68869e-21
Cnbp	3.18806e-25	0.504045	0.685	0.66	5.95338e-21
Lncpint	9.03933e-24	0.588232	0.213	0.121	1.688e-19
Rpl34	1.61802e-23	0.3164	0.821	0.843	3.02149e-19
Rpl30	3.11164e-23	0.37082	0.828	0.841	5.81068e-19
Clk1	5.00928e-23	0.625437	0.453	0.385	9.35433e-19
Ube2d3	5.7277e-23	0.438169	0.679	0.667	1.06959e-18
Cdk11b	5.92222e-23	0.773254	0.344	0.26	1.10591e-18
Srrm2	8.31893e-23	0.454828	0.686	0.694	1.55348e-18
Serp1	1.84664e-22	0.705414	0.475	0.424	3.44842e-18
Arhgef1	5.1792e-22	0.704158	0.278	0.189	9.67165e-18
Ubb	5.24786e-22	0.381856	0.82	0.83	9.79985e-18
Cd44	6.30222e-22	0.681623	0.308	0.218	1.17688e-17
2022-09-09	1.31239e-21	0.57773	0.26	0.17	2.45075e-17
Sf3b1	3.6694e-21	0.561078	0.566	0.565	6.85225e-17
Grb2	5.70155e-21	0.615039	0.326	0.244	1.06471e-16
Ifrd1	6.15081e-21	0.825585	0.406	0.342	1.1486e-16
Ptma	7.21389e-21	0.350446	0.795	0.815	1.34712e-16
Efhd2	1.15826e-20	0.645662	0.273	0.187	2.16294e-16
Calm1	1.42303e-20	0.359593	0.811	0.812	2.65736e-16
Zfp36	1.50566e-20	0.986224	0.541	0.497	2.81168e-16
Slc3a2	6.22105e-20	0.600307	0.421	0.361	1.16172e-15
Prr13	8.37343e-20	0.606959	0.487	0.447	1.56366e-15
Srpk1	9.44936e-20	0.632588	0.301	0.22	1.76457e-15
Ldha	1.01211e-19	0.509617	0.581	0.509	1.89001e-15
Pycard	1.20232e-18	0.645659	0.316	0.238	2.2452e-14
Klf2	3.20056e-18	0.817466	0.579	0.537	5.97672e-14
Smc4	7.12055e-18	0.585832	0.289	0.207	1.32969e-13
Pabpc1	7.45481e-18	0.388453	0.707	0.684	1.39211e-13
Diaph1	8.79116e-18	0.607617	0.325	0.251	1.64166e-13
H2afy	1.15549e-17	0.627089	0.433	0.4	2.15777e-13
Spty2d1	2.05118e-17	0.68378	0.29	0.216	3.83037e-13
Nop53	2.42171e-17	0.601359	0.493	0.472	4.5223e-13
Apbb1ip	7.02945e-17	0.581664	0.326	0.257	1.31268e-12
Actg1	9.92466e-17	0.502907	0.773	0.764	1.85333e-12
Tln1	1.18674e-16	0.596144	0.466	0.438	2.21612e-12
Srsf3	1.56683e-16	0.428351	0.603	0.591	2.9259e-12
Vars	1.79853e-16	0.588512	0.226	0.152	3.35857e-12
Cers4	2.46825e-16	0.570854	0.203	0.129	4.60921e-12
Tpt1	4.79419e-16	0.305599	0.905	0.901	8.95266e-12
Itpr2	8.03916e-16	0.605738	0.247	0.176	1.50123e-11
Rps21	8.82121e-16	0.374134	0.738	0.751	1.64727e-11
Leprotl1	9.1916e-16	0.60355	0.327	0.267	1.71644e-11
Supt4a	1.02668e-15	0.594093	0.411	0.38	1.91723e-11
Srsf2	1.56551e-15	0.459056	0.556	0.52	2.92343e-11
Crlf2	1.62709e-15	0.541058	0.216	0.145	3.03843e-11
Rps18	1.75248e-15	0.318925	0.783	0.797	3.27258e-11
Sp100	1.87848e-15	0.559111	0.369	0.313	3.50786e-11
Arpc5	2.19161e-15	0.506323	0.519	0.54	4.09262e-11
Tpr	3.50968e-15	0.4522	0.544	0.563	6.55398e-11
Lgals3	6.20656e-15	0.952296	0.336	0.276	1.15901e-10
Mdfic	1.00559e-14	0.62394	0.225	0.156	1.87785e-10
Tpm3	1.00876e-14	0.51984	0.463	0.449	1.88376e-10
Rpl36	1.13479e-14	0.273334	0.782	0.771	2.11911e-10
Zcchc11	2.88613e-14	0.647797	0.292	0.232	5.38955e-10
Acot7	3.99933e-14	0.575346	0.225	0.158	7.46835e-10
Dnajc15	5.08669e-14	0.654367	0.282	0.222	9.49889e-10
Oaz1	5.17755e-14	0.315311	0.79	0.82	9.66855e-10
Dnajb1	9.19341e-14	0.74407	0.404	0.335	1.71678e-09
Rps29	1.54758e-13	0.292408	0.778	0.782	2.88995e-09
Jak1	2.05025e-13	0.456276	0.562	0.577	3.82863e-09
Pdcd4	2.41111e-13	0.565264	0.237	0.172	4.50251e-09
Rpl38	5.91561e-13	0.313858	0.697	0.688	1.10468e-08
Fkbp3	1.77388e-12	0.504585	0.406	0.372	3.31254e-08
Twf2	4.03859e-12	0.502734	0.207	0.147	7.54167e-08
Rpl5	6.07925e-12	0.330561	0.744	0.79	1.13524e-07
Rpl11	7.12167e-12	0.251567	0.777	0.795	1.3299e-07
Nfkbiz	1.09073e-11	0.855364	0.391	0.369	2.03682e-07
Serbp1	1.35166e-11	0.375821	0.598	0.581	2.52409e-07
AC149090.1	1.6142e-11	0.487932	0.204	0.144	3.01435e-07
4932438A13Rik	1.92154e-11	0.558116	0.218	0.161	3.58829e-07
Prrc2c	2.07101e-11	0.486937	0.502	0.519	3.8674e-07
Mkrn1	2.38892e-11	0.643028	0.281	0.231	4.46106e-07
Tra2b	2.93856e-11	0.562525	0.461	0.474	5.48746e-07
H2-T23	2.97798e-11	0.448494	0.465	0.437	5.56108e-07
Ivns1abp	3.09257e-11	0.542773	0.201	0.143	5.77506e-07
Rpl3	4.57118e-11	0.252695	0.796	0.846	8.53621e-07
Rora	4.87908e-11	0.931307	0.365	0.356	9.11119e-07
Kdm6b	1.01315e-10	0.602207	0.306	0.258	1.89195e-06
Ifnar1	1.14927e-10	0.537645	0.207	0.152	2.14614e-06
Coq10b	1.19572e-10	0.546098	0.346	0.309	2.23289e-06
Prdx6	1.55499e-10	0.651468	0.523	0.543	2.90379e-06
Tpst2	2.29423e-10	0.567516	0.26	0.209	4.28425e-06
Actr2	2.35085e-10	0.519331	0.37	0.344	4.38997e-06
Psme1	2.46938e-10	0.499347	0.449	0.453	4.61133e-06
Gm26532	4.07598e-10	0.484938	0.215	0.159	7.61148e-06
Taldo1	4.11171e-10	0.590235	0.412	0.401	7.67821e-06
Fgl2	5.21246e-10	0.427731	0.291	0.233	9.73375e-06
Birc2	5.47257e-10	0.556334	0.206	0.154	1.02195e-05
Esyt1	6.32201e-10	0.488272	0.295	0.254	1.18057e-05
Jmjd1c	1.11521e-09	0.568794	0.361	0.338	2.08255e-05
Dbnl	1.27221e-09	0.47925	0.277	0.234	2.37572e-05
Rpl4	1.36736e-09	0.264985	0.802	0.823	2.55341e-05
H3f3a	1.80736e-09	0.29757	0.721	0.764	3.37506e-05
Rack1	1.83039e-09	0.345058	0.724	0.779	3.41808e-05
Rsbn1l	2.19192e-09	0.521215	0.305	0.266	4.0932e-05
Sfpq	2.24309e-09	0.461797	0.486	0.508	4.18874e-05
Eif3h	2.34084e-09	0.38519	0.602	0.625	4.37128e-05
Ythdc1	2.39474e-09	0.608218	0.342	0.316	4.47194e-05
Nt5c	3.91863e-09	0.489212	0.322	0.289	7.31765e-05
Cdkn1a	4.15744e-09	0.614072	0.352	0.31	7.7636e-05
Slc25a3	4.60435e-09	0.400051	0.633	0.657	8.59817e-05
Cited2	5.753e-09	0.662747	0.365	0.342	0.000107432
Pole4	5.95218e-09	0.554561	0.288	0.254	0.000111151
Eef2	7.54298e-09	0.262361	0.739	0.761	0.000140858
Slbp	1.01581e-08	0.526959	0.296	0.261	0.000189693
Cdc42	1.02601e-08	0.294316	0.678	0.709	0.000191597
Set	1.15239e-08	0.395133	0.498	0.505	0.000215198
Gna13	1.39308e-08	0.506718	0.248	0.205	0.000260143
Xist	1.44565e-08	0.299647	0.744	0.776	0.000269961
Ppp1ca	1.62835e-08	0.36096	0.571	0.585	0.000304079
Tma7	2.39818e-08	0.370558	0.559	0.545	0.000447836
Ppp1cc	3.11421e-08	0.587335	0.411	0.421	0.000581548
Pnn	3.44576e-08	0.5131	0.366	0.356	0.000643462
Anp32a	6.01781e-08	0.432993	0.452	0.465	0.00112377
Arf6	6.70932e-08	0.536527	0.302	0.271	0.0012529
Cox5a	8.93492e-08	0.331694	0.491	0.461	0.00166851
Eif3f	1.04878e-07	0.294636	0.689	0.705	0.0019585
Pfdn5	1.17039e-07	0.264311	0.739	0.761	0.00218559
Arid4a	1.34432e-07	0.483514	0.261	0.225	0.00251038
Rap1b	1.51961e-07	0.496939	0.517	0.573	0.00283772
Ostf1	1.57829e-07	0.431501	0.46	0.489	0.0029473
Ywhaz	1.67857e-07	0.462947	0.439	0.461	0.00313456
Smchd1	2.07576e-07	0.509563	0.291	0.259	0.00387628
Lmo4	2.60954e-07	0.950215	0.351	0.356	0.00487305
Tap1	2.67306e-07	0.457398	0.228	0.189	0.00499167
Gm26917	2.76021e-07	0.3864	0.302	0.275	0.00515441
Rps27rt	4.20151e-07	0.565866	0.334	0.318	0.0078459
Ppp1r11	7.47312e-07	0.493263	0.331	0.318	0.0139553
Ubl5	9.15192e-07	0.346416	0.512	0.527	0.0170903
Rpl13a	1.76226e-06	0.28763	0.578	0.561	0.0329084
Rab8a	1.86307e-06	0.481224	0.283	0.26	0.034791
Nsd3	2.22801e-06	0.48299	0.33	0.32	0.0416058
Cdkn1b	2.28434e-06	0.498751	0.249	0.219	0.0426578
Ptpn1	2.29746e-06	0.471293	0.258	0.227	0.0429028
Ccnd3	2.90554e-06	0.499549	0.337	0.334	0.054258
Abracl	4.89889e-06	0.4427	0.379	0.391	0.0914819
H2-Q4	6.75149e-06	0.439695	0.258	0.232	0.126077
1810058I24Rik	1.01091e-05	0.413645	0.302	0.437	0.188777
Vps28	1.52275e-05	0.462603	0.388	0.408	0.284359
Cirbp	1.79352e-05	0.420551	0.291	0.271	0.334921
Itsn2	1.89157e-05	0.427689	0.236	0.206	0.353231
Thy1	2.05995e-05	0.407416	0.42	0.417	0.384675
Acin1	2.50957e-05	0.42972	0.391	0.418	0.468636
Selenot	2.79585e-05	0.500457	0.337	0.337	0.522097
Hsp90aa1	2.88978e-05	0.298676	0.675	0.711	0.539637
mt-Nd5	4.50584e-05	0.274613	0.303	0.251	0.841421
Vgll4	5.9729e-05	0.538708	0.258	0.239	1
Spcs2	6.14974e-05	0.358068	0.498	0.55	1
Bhlhe40	6.41856e-05	0.541891	0.247	0.225	1
Pak2	0.000105501	0.430569	0.331	0.331	1
Zfp292	0.000117104	0.442925	0.27	0.253	1
Gabarapl2	0.000130721	0.407014	0.46	0.503	1
Clint1	0.000143605	0.47264	0.293	0.292	1
Tax1bp1	0.000146752	0.362883	0.518	0.584	1
Eif3e	0.000167529	0.31613	0.525	0.565	1
Snrpd3	0.000198973	0.410575	0.361	0.373	1
Aes	0.000212439	0.32915	0.533	0.602	1
Syf2	0.00022919	0.388003	0.369	0.385	1
Gtf2b	0.000257138	0.473954	0.225	0.206	1
Cmtm7	0.000290788	0.493744	0.27	0.262	1
Myl12b	0.000316383	0.278206	0.496	0.54	1
Trir	0.000357747	0.369658	0.419	0.46	1
Dnajc8	0.000416046	0.390277	0.384	0.407	1
Prkacb	0.000430987	0.433313	0.208	0.19	1
Tsc22d4	0.000509852	0.370292	0.251	0.236	1
Eif5	0.000520499	0.321256	0.549	0.619	1
Dusp11	0.000929989	0.412449	0.293	0.29	1
Ptbp3	0.00117628	0.370907	0.317	0.321	1
Git2	0.00124616	0.374836	0.209	0.189	1
Crip1	0.00131294	0.422074	0.643	0.718	1
Rtf1	0.00213887	0.395365	0.356	0.388	1
Fus	0.00228622	0.251669	0.632	0.719	1
Kctd12	0.00230937	0.489715	0.227	0.212	1
Anp32b	0.00285436	0.2582	0.501	0.529	1
Psma1	0.00349213	0.298824	0.388	0.416	1
Odc1	0.0037959	0.620943	0.251	0.247	1
Klf13	0.00391849	0.386141	0.405	0.449	1
Lsm4	0.00397817	0.324094	0.395	0.429	1
Gm2a	0.00456172	0.642299	0.237	0.235	1
Hspa1a	0.00478893	0.276711	0.229	0.284	1
Eif4a2	0.00558016	0.266321	0.496	0.552	1
Snrpe	0.00613556	0.26613	0.46	0.496	1
Atp6v1f	0.00694725	0.287274	0.489	0.554	1
Snrnp70	0.00710038	0.388164	0.428	0.487	1
Ndfip1	0.00910357	0.44294	0.219	0.215	1
Sptssa	0.00949858	0.445518	0.398	0.453	1
Rbm25	0.00978016	0.357454	0.435	0.502	1
Ccnl1	0.0111078	0.26631	0.513	0.572	1
Dnajb6	0.0119408	0.364221	0.373	0.414	1
Psmb9	0.0120451	0.439706	0.266	0.274	1
Psmb10	0.0146779	0.307882	0.377	0.405	1
Slc38a2	0.0163896	0.276703	0.468	0.52	1
Ubald2	0.0169262	0.439311	0.267	0.272	1
Capza1	0.019228	0.37874	0.244	0.248	1
Fubp1	0.0193953	0.251246	0.258	0.342	1
Ccdc12	0.0209617	0.323492	0.396	0.45	1
Prpf38b	0.0242988	0.379358	0.284	0.3	1
Ppm1g	0.0245619	0.387039	0.218	0.216	1
Mettl23	0.0246572	0.344288	0.254	0.26	1
Mndal	0.0267835	0.360067	0.343	0.367	1
Prkar1a	0.0285389	0.277224	0.443	0.506	1
Arih1	0.030183	0.397158	0.218	0.218	1
Pdcd10	0.0314627	0.39253	0.311	0.335	1
Card19	0.03446	0.357366	0.228	0.227	1
Xrn2	0.0351726	0.386624	0.254	0.262	1
Ube2l3	0.0380042	0.329602	0.374	0.421	1
Dnajc7	0.0403561	0.310299	0.233	0.235	1
Zc3h13	0.0414164	0.390989	0.264	0.275	1
Fam173a	0.0429301	0.393624	0.256	0.267	1
Aff4	0.0446999	0.539237	0.283	0.308	1
Taf10	0.0492186	0.293773	0.358	0.395	1
Chd4	0.0501858	0.391523	0.403	0.462	1
Dazap1	0.0503521	0.251633	0.234	0.305	1
Ywhah	0.051165	0.610744	0.393	0.444	1
Arl6ip1	0.0527328	0.25156	0.447	0.52	1
Sin3b	0.053117	0.33941	0.302	0.33	1
Emg1	0.0632618	0.362969	0.367	0.414	1
Gm9493	0.0719474	0.267815	0.197	0.253	1
Lsm8	0.0734234	0.271183	0.204	0.262	1
Ubn1	0.0740706	0.254474	0.248	0.322	1
Pla2g16	0.0814286	0.335692	0.292	0.311	1
Vamp8	0.0831583	0.297265	0.36	0.404	1
2022-09-11	0.0839923	0.336083	0.341	0.377	1
Mycbp2	0.0848939	0.323644	0.387	0.449	1
Rock1	0.0851746	0.317281	0.396	0.458	1
Tomm20	0.0898333	0.253567	0.444	0.497	1
Rtf2	0.0925694	0.332602	0.22	0.226	1
H2afj	0.0955675	0.307365	0.359	0.391	1
Ptbp1	0.101922	0.264193	0.216	0.273	1
Sf3b3	0.106274	0.254181	0.206	0.26	1
Sltm	0.106936	0.363206	0.286	0.311	1
Ppp2r5a	0.10759	0.282863	0.239	0.248	1
Plgrkt	0.133986	0.366733	0.252	0.271	1
Stat1	0.14447	0.389106	0.232	0.242	1
Pik3r1	0.144526	0.282695	0.269	0.342	1
Hspa4	0.145055	0.271193	0.249	0.321	1
Mdh1	0.169419	0.308574	0.373	0.421	1
Cetn2	0.172668	0.289828	0.175	0.219	1
Rpl9-ps6	0.190228	0.256442	0.177	0.219	1
Chd3	0.191373	0.288973	0.236	0.296	1
Ddx46	0.194878	0.349821	0.272	0.297	1
Dut	0.206744	0.255682	0.165	0.202	1
Cdk2ap2	0.218951	0.363997	0.347	0.395	1
Wapl	0.220785	0.255378	0.219	0.274	1
Plec	0.227774	0.255106	0.252	0.312	1
Rsrc2	0.243654	0.370793	0.368	0.436	1
Hspa1b	0.245818	0.344017	0.181	0.217	1
Ankrd12	0.263003	0.304341	0.35	0.393	1
Lrp10	0.271655	0.26131	0.23	0.284	1
Sbno1	0.279652	0.260324	0.225	0.276	1
Wdr89	0.281771	0.28621	0.172	0.206	1
Arl6ip5	0.293278	0.261736	0.432	0.519	1
Ifi203	0.29708	0.264852	0.339	0.381	1
Eif3m	0.299617	0.295603	0.395	0.471	1
Man2b1	0.306297	0.35485	0.213	0.229	1
Rnf187	0.306714	0.281306	0.304	0.383	1
Herc1	0.30861	0.299331	0.208	0.222	1
Wac	0.323096	0.374373	0.284	0.35	1
Sf1	0.335981	0.256684	0.184	0.222	1
Ssh2	0.358986	0.376096	0.218	0.237	1
Tomm22	0.367719	0.272208	0.37	0.438	1
Arid1a	0.370649	0.345175	0.243	0.269	1
Kmt2c	0.375217	0.257996	0.198	0.236	1
Anxa6	0.384008	0.382185	0.341	0.41	1
Hipk1	0.41149	0.30583	0.19	0.202	1
Llph	0.423485	0.273716	0.253	0.308	1
Socs1	0.424833	0.298969	0.198	0.235	1
Zfand6	0.437991	0.347188	0.332	0.392	1
Ddx24	0.444917	0.362305	0.363	0.435	1
Hectd1	0.462339	0.308718	0.326	0.383	1
Dazap2	0.462402	0.324884	0.31	0.356	1
Peak1	0.471884	0.340279	0.261	0.295	1
Glipr2	0.474473	0.407714	0.237	0.265	1
Gm10073	0.501144	0.264621	0.338	0.42	1
Rnaseh2c	0.519016	0.373562	0.282	0.326	1
Smarca5	0.520814	0.282404	0.323	0.404	1
Myh9	0.527445	0.308728	0.288	0.325	1
Raly	0.527688	0.278843	0.354	0.417	1
Phf20l1	0.542083	0.330174	0.234	0.264	1
Gls	0.549867	0.419923	0.316	0.37	1
Macf1	0.552442	0.304668	0.343	0.427	1
Rsf1	0.557246	0.292932	0.208	0.227	1
Gltp	0.560855	0.332847	0.227	0.253	1
Churc1	0.584746	0.40075	0.286	0.334	1
Lmna	0.603401	0.600348	0.464	0.554	1
Ppp4c	0.606924	0.337292	0.275	0.315	1
Mark2	0.617809	0.298714	0.191	0.227	1
Kpna4	0.619926	0.319913	0.252	0.286	1
Nr3c1	0.620304	0.251022	0.398	0.501	1
Syngr2	0.635923	0.39631	0.194	0.213	1
Pitpna	0.654467	0.32363	0.315	0.377	1
Hnrnpd	0.654722	0.281949	0.32	0.378	1
Gpi1	0.655064	0.267503	0.335	0.415	1
Rnf130	0.658207	0.252284	0.257	0.304	1
Tmem123	0.685905	0.503779	0.238	0.287	1
Kmt2a	0.696155	0.300951	0.267	0.306	1
Cab39	0.707695	0.287669	0.204	0.225	1
Magoh	0.713365	0.278326	0.261	0.313	1
Taf1d	0.721327	0.305918	0.215	0.239	1
Cdc37	0.721696	0.275707	0.39	0.476	1
Bclaf1	0.751037	0.311409	0.353	0.442	1
Hnrnpm	0.760444	0.286571	0.298	0.348	1
Arid4b	0.765591	0.290801	0.269	0.323	1
Tnrc6b	0.770476	0.286709	0.304	0.368	1
Ak2	0.77518	0.276426	0.225	0.263	1
Idnk	0.781422	0.353634	0.224	0.256	1
Hnrnpl	0.809205	0.322133	0.262	0.301	1
Anp32e	0.814065	0.263682	0.209	0.241	1
Rgs10	0.822755	0.524546	0.197	0.231	1
Nop56	0.82668	0.338928	0.221	0.26	1
Frg1	0.842801	0.30562	0.221	0.25	1
Commd4	0.844909	0.280355	0.212	0.239	1
2810474O19Rik	0.846315	0.287984	0.262	0.308	1
Pfkp	0.847665	0.298468	0.241	0.273	1
Phip	0.849869	0.297747	0.265	0.311	1
Kmt2e	0.855277	0.298036	0.379	0.464	1
Senp6	0.85625	0.267534	0.326	0.396	1
Hprt	0.864564	0.290044	0.242	0.28	1
Bptf	0.865898	0.294695	0.331	0.407	1
Emd	0.866981	0.286896	0.223	0.251	1
Eno1	0.871362	0.341255	0.244	0.281	1
Zfp36l1	0.87366	0.335502	0.538	0.653	1
Commd8	0.879588	0.257539	0.206	0.231	1
Bzw2	0.881051	0.258486	0.182	0.206	1
Zyx	0.883729	0.344769	0.321	0.381	1
Smarce1	0.897131	0.267938	0.251	0.288	1
Tmem160	0.899932	0.251196	0.345	0.418	1
Ctcf	0.914113	0.296432	0.245	0.286	1
Puf60	0.920062	0.318033	0.301	0.362	1
Ogt	0.925714	0.30768	0.265	0.314	1
Arpc4	0.925728	0.313877	0.223	0.257	1
Dnajc2	0.928708	0.299306	0.185	0.206	1
Nol7	0.946243	0.281562	0.334	0.405	1
Psme2	0.948646	0.370118	0.371	0.449	1
Nemf	0.951758	0.303959	0.198	0.226	1
Nipbl	0.969267	0.278893	0.324	0.39	1
Sf3b2	0.970397	0.252051	0.426	0.534	1
Fbl	0.970491	0.268843	0.271	0.321	1
Polr2a	0.973208	0.267943	0.199	0.223	1
Fam96a	0.978521	0.252514	0.214	0.243	1
Zcchc6	0.979221	0.272207	0.271	0.318	1
Rad50	0.992595	0.266179	0.189	0.212	1
Snrpg	0.996853	0.328221	0.218	0.249	1
Tob1	0.99974	0.273184	0.201	0.223	1

## Sheet: Luminal Cell
	p_val	avg_logFC	pct.1	pct.2	p_val_adj
Ly6d	0	3.893	0.691	0.036	0
Krt18	0	3.83347	0.813	0.028	0
Ptn	0	3.77886	0.661	0.086	0
Wfdc18	0	3.66686	0.377	0.017	0
Krt19	0	3.55902	0.729	0.065	0
Prlr	0	3.291	0.664	0.039	0
Wfdc2	0	3.25168	0.621	0.034	0
Krt8	0	3.2273	0.817	0.032	0
Epcam	0	2.87306	0.776	0.026	0
Slc12a2	0	2.86732	0.631	0.077	0
Fxyd3	0	2.53863	0.78	0.027	0
Ltf	0	2.37569	0.27	0.007	0
Lcn2	0	2.37421	0.432	0.042	0
Spint2	0	2.26713	0.804	0.065	0
Krt7	0	2.25806	0.642	0.018	0
Aqp5	0	2.25489	0.656	0.014	0
Cldn3	0	2.10329	0.692	0.032	0
Cited1	0	2.01107	0.511	0.079	0
Cd24a	0	1.93791	0.669	0.05	0
Tmem56	0	1.92584	0.578	0.015	0
Fxyd2	0	1.90814	0.391	0.027	0
Fam25c	0	1.85039	0.507	0.018	0
Gata3	0	1.82593	0.729	0.038	0
Trps1	0	1.75898	0.721	0.069	0
Cldn4	0	1.64444	0.622	0.007	0
Ido1	0	1.62335	0.297	0.013	0
Sfn	0	1.57508	0.648	0.02	0
Tmprss2	0	1.531	0.538	0.008	0
Stc2	0	1.5156	0.476	0.017	0
Tacstd2	0	1.49989	0.604	0.007	0
Sdc4	0	1.49369	0.851	0.274	0
Gipc2	0	1.4925	0.538	0.015	0
Apobec3	0	1.45799	0.705	0.145	0
Cxcl15	0	1.42712	0.474	0.007	0
Cldn7	0	1.38779	0.609	0.01	0
Foxa1	0	1.37555	0.513	0.006	0
Plet1	0	1.3612	0.483	0.004	0
Clu	0	1.32673	0.678	0.128	0
Cdo1	0	1.31691	0.5	0.037	0
Fgg	0	1.3019	0.289	0.007	0
Slc7a2	0	1.29902	0.516	0.032	0
Fcgbp	0	1.2687	0.279	0.002	0
Gsta4	0	1.22506	0.369	0.021	0
Tfap2b	0	1.21754	0.549	0.003	0
Lgals7	0	1.21232	0.269	0.013	0
Rab25	0	1.20442	0.572	0.005	0
Cystm1	0	1.19857	0.599	0.102	0
Runx1	0	1.18494	0.628	0.079	0
Ccnd1	0	1.17022	0.595	0.069	0
Dgat2	0	1.16826	0.44	0.034	0
Sox9	0	1.1671	0.545	0.088	0
Fgfr2	0	1.16403	0.52	0.01	0
Tspan1	0	1.16265	0.463	0.006	0
Clca3a2	0	1.16221	0.313	0.002	0
Nrxn3	0	1.15781	0.389	0.002	0
3110079O15Rik	0	1.14757	0.204	0.001	0
Acot1	0	1.14627	0.548	0.035	0
Enho	0	1.13138	0.504	0.07	0
Urah	0	1.12718	0.567	0.005	0
Alcam	0	1.11061	0.528	0.018	0
Irx1	0	1.09045	0.472	0.008	0
Snhg11	0	1.08426	0.391	0.014	0
Cldn10	0	1.08371	0.462	0.034	0
Dnajc12	0	1.07987	0.483	0.026	0
Dkkl1	0	1.07886	0.467	0.01	0
Irx2	0	1.07414	0.545	0.014	0
Capsl	0	1.0733	0.456	0.006	0
Cd82	0	1.05336	0.649	0.093	0
Cxadr	0	1.0455	0.466	0.004	0
Ano1	0	1.02938	0.554	0.029	0
Wnt4	0	1.0207	0.456	0.016	0
Smim22	0	1.01097	0.516	0.008	0
Ezr	0	1.00987	0.599	0.079	0
R3hdml	0	1.00726	0.372	0.004	0
Piezo2	0	0.992171	0.436	0.021	0
Arg2	0	0.981503	0.417	0.005	0
Mlph	0	0.975006	0.506	0.006	0
Tpd52	0	0.969862	0.571	0.056	0
Tuba4a	0	0.969564	0.532	0.044	0
Slc5a5	0	0.962397	0.377	0.005	0
Ptprf	0	0.959737	0.538	0.052	0
Atp6v1b1	0	0.958609	0.253	0.002	0
Lsr	0	0.951932	0.513	0.011	0
Klc3	0	0.948874	0.484	0.005	0
Ucp2	0	0.923557	0.606	0.113	0
Tmc4	0	0.922076	0.535	0.042	0
Cdh1	0	0.917316	0.491	0.004	0
Perp	0	0.902124	0.391	0.015	0
Cited4	0	0.901659	0.342	0.008	0
Inhbb	0	0.898057	0.455	0.013	0
Mtmr7	0	0.88896	0.428	0.007	0
Plb1	0	0.876353	0.243	0.002	0
Smagp	0	0.872861	0.537	0.045	0
Kcnk1	0	0.85834	0.487	0.006	0
Hdac11	0	0.856	0.477	0.029	0
Aldoc	0	0.85086	0.419	0.003	0
Spint1	0	0.846481	0.463	0.004	0
Pgr	0	0.845356	0.381	0.009	0
Cmtm8	0	0.831291	0.505	0.045	0
Nectin4	0	0.829809	0.429	0.003	0
Cracr2b	0	0.827044	0.494	0.053	0
Kif5c	0	0.817837	0.4	0.009	0
Elf3	0	0.791348	0.396	0.002	0
Prom1	0	0.79084	0.368	0.013	0
Kit	0	0.785025	0.259	0.012	0
Mtss1	0	0.782808	0.482	0.059	0
Slc9a3r1	0	0.778829	0.556	0.082	0
Plpp2	0	0.762416	0.478	0.04	0
Tmem2	0	0.755609	0.457	0.049	0
Krtcap3	0	0.7549	0.416	0.006	0
Mboat1	0	0.744221	0.417	0.016	0
Cd164l2	0	0.729662	0.407	0.002	0
Sorl1	0	0.726053	0.433	0.019	0
Mapk13	0	0.716949	0.414	0.003	0
Serpinb5	0	0.706462	0.322	0.001	0
Barx2	0	0.702453	0.225	0.003	0
St14	0	0.702128	0.402	0.004	0
Coro2a	0	0.700543	0.391	0.018	0
Homer2	0	0.688149	0.385	0.02	0
Gm16136	0	0.686348	0.361	0.002	0
Casz1	0	0.682544	0.394	0.019	0
Serinc2	0	0.675949	0.39	0.003	0
Muc15	0	0.674261	0.205	0.001	0
Smim3	0	0.666501	0.369	0.041	0
Ttc6	0	0.655862	0.344	0.002	0
Ppfibp2	0	0.655861	0.384	0.037	0
Slc5a7	0	0.653396	0.22	0.001	0
Elf5	0	0.652722	0.221	0.001	0
Stard10	0	0.652357	0.439	0.021	0
Ank3	0	0.624764	0.472	0.046	0
Ptprk	0	0.62047	0.385	0.035	0
Dsp	0	0.616457	0.336	0.001	0
1810010D01Rik	0	0.606518	0.203	0.001	0
Cyp3a57	0	0.600969	0.286	0.001	0
Il17re	0	0.595454	0.359	0.003	0
Nrtn	0	0.58824	0.263	0.005	0
Ehf	0	0.584994	0.221	0.001	0
Crb3	0	0.575371	0.35	0.002	0
Bik	0	0.571017	0.378	0.019	0
Hs3st6	0	0.569673	0.313	0.005	0
Arrdc1	0	0.566455	0.406	0.044	0
Cdcp1	0	0.561631	0.326	0.002	0
Fam84a	0	0.559618	0.279	0.002	0
Proc	0	0.556879	0.274	0.001	0
Syne4	0	0.54967	0.336	0.002	0
Tox2	0	0.546529	0.291	0.011	0
Tmem30b	0	0.534537	0.315	0.013	0
Erbb3	0	0.529112	0.357	0.016	0
Trim29	0	0.528081	0.237	0.002	0
Rbm47	0	0.527958	0.304	0.004	0
Klf5	0	0.527664	0.395	0.05	0
Vill	0	0.526258	0.339	0.024	0
Pdzk1ip1	0	0.522041	0.247	0.003	0
A830008E24Rik	0	0.512058	0.276	0.001	0
Rab27b	0	0.509056	0.325	0.014	0
Galnt3	0	0.507455	0.308	0.002	0
Nav2	0	0.504678	0.281	0.021	0
Retreg1	0	0.501057	0.38	0.035	0
Celsr2	0	0.499959	0.278	0.003	0
Prom2	0	0.496662	0.251	0.001	0
Upk2	0	0.495489	0.273	0.001	0
9530014B07Rik	0	0.490377	0.236	0.001	0
Pkp3	0	0.488148	0.322	0.013	0
Chmp4c	0	0.486343	0.284	0.009	0
Fermt1	0	0.485696	0.231	0.001	0
Eps8l2	0	0.483583	0.322	0.029	0
Sytl1	0	0.476528	0.304	0.006	0
Rhov	0	0.473167	0.215	0.001	0
2310030G06Rik	0	0.472859	0.274	0.006	0
Hook2	0	0.472054	0.317	0.029	0
Marveld3	0	0.471124	0.279	0.001	0
Pof1b	0	0.470991	0.296	0.001	0
Prss8	0	0.469011	0.286	0.001	0
Wwc1	0	0.468838	0.285	0.002	0
Fam174b	0	0.467879	0.32	0.019	0
Cysrt1	0	0.466263	0.219	0.001	0
Abcc3	0	0.462766	0.278	0.007	0
Cgn	0	0.453149	0.282	0.001	0
Msx2	0	0.453054	0.271	0.001	0
Cblc	0	0.452183	0.278	0.002	0
Sorbs2	0	0.451695	0.417	0.054	0
Lad1	0	0.448526	0.28	0.001	0
Mpzl2	0	0.447196	0.269	0.003	0
Mmp15	0	0.44698	0.3	0.027	0
Tmem54	0	0.443839	0.287	0.002	0
Esrp1	0	0.441369	0.244	0.001	0
Grb7	0	0.437	0.262	0.001	0
Cldn8	0	0.42871	0.257	0.001	0
Stap2	0	0.427949	0.291	0.013	0
Tjp3	0	0.419146	0.258	0.002	0
Rassf6	0	0.417276	0.251	0.001	0
Tfap2a	0	0.416156	0.262	0.003	0
Myh14	0	0.409254	0.264	0.003	0
Slc38a1	0	0.408933	0.325	0.024	0
Samd5	0	0.407328	0.241	0.017	0
Grhl1	0	0.40607	0.247	0.002	0
Slc44a3	0	0.404119	0.258	0.016	0
Ildr1	0	0.401239	0.238	0.001	0
Ssh3	0	0.399927	0.256	0.011	0
C77080	0	0.392333	0.271	0.018	0
Irf6	0	0.388045	0.249	0.005	0
Ripk4	0	0.386448	0.246	0.001	0
Mpzl3	0	0.385829	0.238	0.004	0
Stxbp2	0	0.383454	0.26	0.008	0
Tom1l1	0	0.382527	0.248	0.015	0
Bspry	0	0.381819	0.251	0.002	0
Prag1	0	0.379108	0.244	0.017	0
Tmem40	0	0.37349	0.237	0.003	0
Slc15a2	0	0.373427	0.215	0.012	0
2610528J11Rik	0	0.36801	0.252	0.001	0
Hpn	0	0.36527	0.224	0.003	0
Prr15l	0	0.346562	0.225	0.001	0
Scnn1a	0	0.346155	0.218	0.003	0
Tmem184a	0	0.333242	0.203	0.001	0
Lmx1b	0	0.330326	0.202	0.005	0
Rab11fip1	0	0.327311	0.214	0.008	0
Epb41l4b	0	0.326391	0.232	0.015	0
Wnt7b	0	0.325105	0.203	0	0
Arhgef16	0	0.321968	0.218	0.008	0
Ccdc162	0	0.3214	0.209	0.004	0
Hid1	0	0.31666	0.208	0.01	0
Pkp2	0	0.309057	0.222	0.01	0
Ccdc92	0	0.299933	0.218	0.007	0
H2-Q2	0	0.29191	0.202	0.001	0
Ctf1	0	0.288302	0.204	0.011	0
Sult2b1	0	0.285683	0.207	0.002	0
Nos1ap	0	0.2721	0.203	0.01	0
Gclc	3.54841e-304	0.987296	0.516	0.1	6.6263e-300
Irx5	2.2322e-303	0.49948	0.315	0.034	4.16841e-299
Lmo7	1.01959e-300	0.49004	0.39	0.051	1.90397e-296
Cd14	1.19397e-300	1.08063	0.287	0.029	2.22963e-296
Nipal2	9.11282e-300	0.558471	0.396	0.054	1.70173e-295
Plk2	1.70434e-298	1.27246	0.631	0.158	3.18269e-294
Rab3ip	9.81304e-297	0.589184	0.391	0.055	1.83249e-292
Arhgef5	8.35146e-296	0.374637	0.286	0.028	1.55955e-291
Cib2	4.16713e-293	0.454418	0.317	0.036	7.7817e-289
H3f3b	5.49534e-291	1.25647	0.958	0.748	1.0262e-286
Irx3	5.46416e-288	0.463617	0.289	0.03	1.02038e-283
Slc5a6	6.18759e-287	0.459151	0.238	0.02	1.15547e-282
Tead2	1.92348e-285	0.640285	0.444	0.075	3.59191e-281
Fam110a	9.64828e-282	0.386787	0.309	0.035	1.80172e-277
Hipk2	6.04049e-280	0.597311	0.378	0.054	1.128e-275
Atf3	1.45599e-279	1.74492	0.835	0.4	2.71891e-275
Kctd1	3.63162e-279	0.375216	0.21	0.015	6.78169e-275
Tspan13	7.57876e-275	0.918601	0.537	0.111	1.41526e-270
Chchd10	2.07092e-274	0.535035	0.498	0.094	3.86724e-270
Tmem51	2.96563e-271	0.365164	0.281	0.029	5.53801e-267
Plekhb1	6.24295e-269	0.425226	0.218	0.017	1.16581e-264
Ube2q2	1.20312e-266	0.855554	0.499	0.105	2.24671e-262
Cd9	2.26909e-264	1.09782	0.938	0.492	4.2373e-260
Epb41l5	1.66255e-258	0.283288	0.218	0.018	3.10464e-254
Rassf9	2.33347e-258	0.385548	0.295	0.034	4.35752e-254
Cyb561	1.23745e-257	0.56201	0.458	0.083	2.31081e-253
Amd1	2.50735e-255	0.491759	0.366	0.055	4.68223e-251
Sh3yl1	2.89842e-254	0.365239	0.248	0.025	5.4125e-250
Phyh	3.45332e-254	1.29434	0.568	0.155	6.44873e-250
Cd200	1.0804e-252	0.967427	0.611	0.163	2.01754e-248
Tapt1	7.402e-249	0.554612	0.383	0.062	1.38225e-244
H2-DMb1	7.44152e-248	0.305427	0.23	0.021	1.38963e-243
B4galnt1	1.05922e-246	0.434199	0.361	0.055	1.97799e-242
Hsdl2	1.39838e-246	0.750377	0.542	0.129	2.61134e-242
Cdca7l	8.13556e-245	0.35727	0.224	0.021	1.51923e-240
Mettl26	1.50012e-244	0.720578	0.546	0.131	2.80132e-240
Itga6	1.6726e-244	0.432735	0.406	0.066	3.12341e-240
Ramp1	5.63013e-243	0.603472	0.394	0.064	1.05137e-238
Ktn1	2.30824e-241	1.31296	0.689	0.252	4.31041e-237
Lama5	4.1095e-241	0.415505	0.274	0.032	7.67409e-237
Fam210b	2.02421e-239	0.370064	0.29	0.036	3.78e-235
Pde4d	1.01646e-234	0.449691	0.276	0.034	1.89814e-230
Abhd17c	2.07404e-233	0.538553	0.408	0.076	3.87307e-229
Bhlhe41	2.47293e-232	1.03581	0.467	0.102	4.61795e-228
Wnt5b	3.49233e-231	0.514117	0.216	0.021	6.52157e-227
Fos	1.08811e-230	1.11125	0.96	0.736	2.03194e-226
Tbx3	3.27311e-230	0.418399	0.309	0.042	6.1122e-226
Rpl3	5.23273e-227	0.906809	0.925	0.84	9.7716e-223
Tnfrsf21	8.59722e-224	0.417341	0.329	0.05	1.60544e-219
Cdk19	7.02484e-223	0.637931	0.474	0.103	1.31182e-218
Slc25a23	2.61976e-222	0.415585	0.314	0.045	4.89214e-218
Tst	1.80199e-218	0.444057	0.37	0.065	3.36504e-214
Eps8l1	1.01253e-214	0.292661	0.209	0.02	1.89081e-210
Chka	2.49793e-211	0.726183	0.518	0.131	4.66464e-207
Nectin2	2.50631e-211	0.38168	0.319	0.049	4.68028e-207
Adck5	5.65788e-211	0.482717	0.33	0.054	1.05655e-206
Nck2	1.58833e-208	0.365529	0.274	0.037	2.96604e-204
Clmn	6.86618e-207	0.5561	0.273	0.038	1.28219e-202
Cadps2	1.72784e-204	0.292678	0.23	0.026	3.22656e-200
Tgif1	2.36507e-204	0.614825	0.438	0.097	4.41653e-200
Map7	1.06088e-203	0.279953	0.216	0.023	1.98109e-199
Hip1r	2.11303e-203	0.336905	0.244	0.03	3.94587e-199
Sipa1l3	2.4974e-203	0.367749	0.304	0.047	4.66364e-199
2200002D01Rik	2.72845e-201	0.36156	0.304	0.047	5.09511e-197
Ddr1	2.23199e-200	0.530608	0.35	0.064	4.16801e-196
Sbno2	1.03813e-199	1.0719	0.697	0.278	1.93861e-195
Jun	1.72764e-198	1.06118	0.94	0.706	3.2262e-194
Fosb	2.09921e-197	1.08331	0.913	0.581	3.92007e-193
Zfp664	3.20212e-197	0.766649	0.515	0.142	5.97963e-193
Rab20	2.76725e-196	0.391997	0.306	0.05	5.16757e-192
Eef2	3.06854e-195	0.878173	0.934	0.752	5.73018e-191
Trib1	8.85065e-194	0.871231	0.494	0.132	1.65277e-189
Fxyd6	2.72568e-192	0.591366	0.52	0.133	5.08993e-188
Tob1	3.20015e-192	0.787628	0.631	0.203	5.97595e-188
Ptk7	1.21447e-188	0.386419	0.218	0.026	2.2679e-184
Tsc22d1	7.42654e-188	1.22257	0.762	0.35	1.38683e-183
F11r	2.92382e-185	0.296924	0.276	0.041	5.45994e-181
Pafah1b3	4.98807e-184	0.460271	0.429	0.1	9.31473e-180
Marcksl1	3.73897e-180	0.774061	0.473	0.123	6.98215e-176
Eml2	5.49112e-180	0.500637	0.342	0.067	1.02541e-175
Cytip	2.16399e-179	0.49464	0.209	0.025	4.04103e-175
Lpin2	1.12711e-178	0.525689	0.342	0.066	2.10477e-174
Slco2a1	1.39286e-178	0.627965	0.394	0.088	2.60103e-174
Phkb	3.21923e-178	0.476942	0.372	0.077	6.01159e-174
Tgm2	1.46766e-173	0.774307	0.537	0.163	2.74071e-169
Ceacam1	1.57804e-173	0.2988	0.216	0.027	2.94684e-169
Cd164	2.92228e-173	1.83638	0.713	0.419	5.45706e-169
Tanc2	6.2383e-173	0.467656	0.385	0.083	1.16494e-168
Lrg1	3.66342e-172	0.294765	0.28	0.046	6.84106e-168
Socs3	7.14253e-172	1.0982	0.803	0.433	1.3338e-167
Plekha6	2.28112e-170	0.397597	0.282	0.047	4.25976e-166
Eif4a2	1.15656e-169	0.809435	0.869	0.534	2.15976e-165
Nabp1	4.0789e-169	0.371679	0.388	0.084	7.61694e-165
Pacsin3	1.31353e-168	0.354995	0.346	0.07	2.45289e-164
Ddi2	4.9129e-168	0.549306	0.443	0.112	9.17435e-164
Pak1	8.95511e-167	0.357757	0.328	0.065	1.67228e-162
Naca	5.72072e-165	0.76364	0.917	0.784	1.06829e-160
Glul	1.62572e-164	1.50028	0.76	0.401	3.03587e-160
Tmem158	6.83111e-164	1.46766	0.573	0.23	1.27564e-159
Fam69a	1.52632e-163	0.745292	0.488	0.147	2.85025e-159
Nedd4l	3.74165e-160	0.396152	0.311	0.061	6.98716e-156
Ly6e	2.76719e-159	1.12212	0.833	0.583	5.16745e-155
Pwwp2b	2.21972e-156	0.273993	0.222	0.032	4.14511e-152
Dusp16	5.28729e-156	0.421492	0.328	0.068	9.87349e-152
Bex3	6.10171e-156	0.71034	0.645	0.25	1.13943e-151
Agps	8.66912e-154	0.794845	0.407	0.109	1.61887e-149
Btf3	2.73431e-153	1.0225	0.875	0.728	5.10605e-149
Serinc3	4.70343e-153	1.06208	0.796	0.493	8.78318e-149
Strbp	1.92247e-152	0.289883	0.269	0.047	3.59002e-148
Gcnt2	3.50926e-152	0.30068	0.297	0.056	6.5532e-148
Lman2l	6.57286e-151	0.384819	0.329	0.07	1.22742e-146
Gm26532	3.50966e-150	0.683821	0.487	0.147	6.55393e-146
Rab15	5.56093e-150	0.303239	0.248	0.042	1.03845e-145
AC149090.1	6.78522e-147	0.539127	0.461	0.132	1.26707e-142
Rhod	3.55605e-146	0.32835	0.295	0.06	6.64057e-142
Btg2	1.118e-145	0.855664	0.895	0.649	2.08775e-141
Nudt14	6.63039e-145	0.301989	0.285	0.055	1.23816e-140
Actn1	7.06141e-145	0.49846	0.49	0.147	1.31865e-140
Sgms2	3.74939e-144	0.465123	0.292	0.059	7.00161e-140
Rpl18	1.55508e-142	0.736804	0.899	0.827	2.90396e-138
Rpl6	2.13663e-142	0.694601	0.922	0.828	3.98995e-138
Vamp8	1.98096e-141	0.759563	0.735	0.387	3.69924e-137
Rps16	5.6038e-139	0.630785	0.918	0.875	1.04645e-134
Ctr9	1.16207e-138	0.611647	0.441	0.131	2.17004e-134
Nek7	1.10413e-137	0.726486	0.559	0.212	2.06185e-133
Limk2	1.28192e-137	0.313935	0.235	0.04	2.39386e-133
Vars	7.54203e-136	0.472265	0.467	0.142	1.4084e-131
Zfand1	3.38314e-134	0.329825	0.298	0.064	6.31767e-130
Ift43	4.55676e-134	0.588489	0.611	0.242	8.5093e-130
Dusp18	5.50454e-134	0.3776	0.273	0.056	1.02792e-129
Gstt3	2.80904e-133	0.412496	0.392	0.104	5.2456e-129
Gclm	2.8661e-133	0.705932	0.532	0.196	5.35215e-129
Svil	5.50966e-133	1.14447	0.631	0.317	1.02887e-128
Specc1	1.96595e-132	0.268622	0.222	0.037	3.67122e-128
Rpl26	3.95016e-132	0.670859	0.912	0.847	7.37652e-128
Rpl18a	5.68815e-132	0.683713	0.919	0.867	1.06221e-127
Bcl2l11	5.8187e-131	0.270625	0.232	0.041	1.08658e-126
Macrod1	8.07977e-131	0.304103	0.232	0.041	1.50882e-126
Syngr2	1.19845e-129	0.56582	0.537	0.197	2.23799e-125
Dhrs3	1.39324e-128	0.54534	0.504	0.17	2.60174e-124
Tjp2	2.61152e-128	0.340085	0.249	0.048	4.87675e-124
Gde1	2.73336e-127	0.731201	0.615	0.28	5.10427e-123
H2-Ke6	3.72586e-127	0.397644	0.441	0.133	6.95767e-123
Ptma	3.93537e-127	0.642284	0.93	0.808	7.34891e-123
Igf2bp3	4.21497e-127	0.482862	0.325	0.079	7.87103e-123
Ssx2ip	8.29576e-127	0.347663	0.263	0.053	1.54915e-122
Hspb1	3.2311e-126	0.974866	0.703	0.336	6.03376e-122
Fbxw11	8.05344e-126	0.443437	0.4	0.112	1.5039e-121
Cdc14a	9.94887e-126	0.321634	0.236	0.044	1.85785e-121
Tmem176b	6.54146e-125	0.610681	0.757	0.339	1.22155e-120
Lpar6	1.05312e-122	0.407157	0.325	0.079	1.9666e-118
Rpl17	2.40099e-121	0.621136	0.919	0.852	4.48361e-117
Atp1b1	2.80034e-121	0.305783	0.342	0.084	5.22936e-117
Cbx7	2.81525e-120	0.277474	0.265	0.054	5.2572e-116
Dusp6	4.95368e-120	0.554399	0.368	0.102	9.25051e-116
Carmil1	5.88874e-118	0.326368	0.237	0.047	1.09966e-113
Junb	4.97587e-117	0.771076	0.891	0.662	9.29193e-113
Slc25a33	1.10802e-116	0.285559	0.248	0.051	2.06912e-112
Cirbp	2.04377e-116	0.501942	0.626	0.255	3.81654e-112
Ier2	2.31083e-116	0.886665	0.842	0.552	4.31525e-112
Hint2	4.57194e-116	0.482523	0.571	0.226	8.53764e-112
Rpl37	2.02311e-115	0.694153	0.911	0.791	3.77796e-111
Rassf3	2.09157e-115	0.317488	0.302	0.071	3.9058e-111
Slc25a36	2.29279e-115	0.418136	0.383	0.109	4.28157e-111
Ube2f	2.99714e-115	0.498306	0.515	0.193	5.59685e-111
Tm4sf1	5.11982e-115	0.770842	0.678	0.34	9.56075e-111
Btg1	8.95036e-115	0.572969	0.806	0.452	1.67139e-110
AW112010	1.22905e-114	1.78819	0.597	0.332	2.29512e-110
Rpl23	5.88651e-114	0.583245	0.914	0.86	1.09925e-109
Atp6v1d	1.60348e-113	0.605089	0.578	0.246	2.99433e-109
Cx3cl1	6.25355e-113	0.311509	0.23	0.046	1.16779e-108
Papss1	1.93661e-112	0.461465	0.54	0.204	3.61642e-108
Trf	3.6692e-112	1.7012	0.355	0.112	6.85186e-108
Flywch2	7.83801e-112	0.257824	0.269	0.06	1.46367e-107
Bcl2l1	1.48872e-111	0.328436	0.331	0.087	2.78003e-107
Msi2	2.78984e-111	0.408346	0.405	0.123	5.20975e-107
Clcn3	8.18123e-111	0.432119	0.383	0.11	1.52776e-106
Dnase2a	2.46282e-110	0.316795	0.384	0.112	4.59907e-106
Trp53bp2	6.49912e-110	0.379663	0.302	0.077	1.21364e-105
Mfsd6	8.27095e-110	0.296493	0.276	0.063	1.54452e-105
Gpd2	1.99227e-109	0.337599	0.32	0.083	3.72037e-105
Trappc6a	2.85392e-109	0.520998	0.561	0.234	5.32941e-105
Rps14	8.14184e-109	0.560645	0.914	0.893	1.52041e-104
Cav2	1.11648e-108	0.310773	0.444	0.143	2.08491e-104
Tmem176a	6.05332e-108	0.509799	0.685	0.299	1.1304e-103
Eef1a1	1.11788e-106	0.496627	0.954	0.902	2.08754e-102
Ptpn1	1.67651e-106	0.532234	0.531	0.215	3.13071e-102
Bphl	1.78803e-106	0.408277	0.391	0.121	3.33898e-102
Fau	3.05029e-106	0.565868	0.905	0.83	5.69611e-102
Bcl7a	3.06499e-106	0.271004	0.221	0.044	5.72357e-102
Cep290	8.86957e-106	0.343104	0.314	0.083	1.6563e-101
Cep170b	1.98713e-105	0.252657	0.202	0.038	3.71077e-101
Rpl27a	3.55465e-105	0.517027	0.934	0.866	6.63796e-101
Pfdn5	6.07327e-105	0.613957	0.891	0.754	1.13412e-100
Hp	4.90906e-104	0.567933	0.263	0.062	9.16718e-100
Rps18	5.57284e-104	0.670286	0.886	0.792	1.04067e-99
Guk1	3.08097e-103	0.672805	0.631	0.327	5.75339e-99
Gle1	3.17752e-103	0.452328	0.44	0.152	5.9337e-99
Slc27a1	9.69404e-103	0.276323	0.236	0.052	1.81026e-98
Map3k1	1.06446e-102	0.324646	0.293	0.075	1.98777e-98
Pkm	5.95384e-102	0.753559	0.778	0.502	1.11182e-97
Atpif1	8.12344e-102	0.714609	0.797	0.546	1.51697e-97
Rpl10a	1.48885e-101	0.628013	0.889	0.775	2.78028e-97
Tes	2.22575e-101	0.344538	0.235	0.05	4.15636e-97
Dcxr	3.06476e-101	0.372627	0.309	0.084	5.72313e-97
Fam129b	3.31937e-101	0.377191	0.363	0.111	6.1986e-97
Neat1	1.75263e-100	0.91363	0.834	0.59	3.27286e-96
Rps3	4.06746e-100	0.541224	0.914	0.856	7.59557e-96
Acadl	4.5051e-100	0.607719	0.661	0.335	8.41283e-96
Rps6	5.91161e-100	0.604109	0.921	0.86	1.10393e-95
Cab39l	1.8794e-99	0.386511	0.43	0.148	3.50959e-95
Sik1	2.1199e-97	0.314122	0.318	0.087	3.9587e-93
Mien1	6.34478e-97	0.626531	0.649	0.349	1.18482e-92
Rab4a	1.64041e-96	0.261358	0.28	0.071	3.0633e-92
Desi1	2.18197e-96	0.315586	0.347	0.106	4.07461e-92
Eif3h	4.23427e-96	0.564519	0.861	0.613	7.90708e-92
Rpl14	1.20068e-95	0.633146	0.905	0.815	2.24215e-91
Upf3b	2.82407e-95	0.410362	0.385	0.125	5.27367e-91
Rpl36	3.84945e-95	0.634616	0.888	0.767	7.18847e-91
Hist1h1c	5.82256e-95	0.613918	0.457	0.174	1.0873e-90
Trpm4	8.20463e-94	0.278222	0.211	0.046	1.53213e-89
Csrp1	2.31152e-92	0.977984	0.628	0.305	4.31654e-88
Atp5g2	3.06799e-91	0.641207	0.801	0.564	5.72916e-87
Afdn	3.50501e-91	0.344819	0.507	0.198	6.54525e-87
Vdac1	7.93547e-91	0.583485	0.654	0.351	1.48187e-86
Rpl4	1.19468e-90	0.54245	0.908	0.818	2.23094e-86
Eci1	1.48426e-90	0.389523	0.518	0.211	2.77171e-86
Rasd1	3.43855e-90	0.2755	0.226	0.051	6.42115e-86
Mcm6	4.67434e-90	0.376831	0.318	0.094	8.72886e-86
Jup	1.14505e-89	0.299946	0.469	0.174	2.13826e-85
Rbm39	1.86546e-89	0.520148	0.914	0.771	3.48357e-85
Skil	9.16764e-89	0.409589	0.4	0.139	1.71197e-84
Rpl32	1.4771e-88	0.538367	0.912	0.852	2.75834e-84
Prkab1	1.56571e-88	0.301221	0.287	0.08	2.9238e-84
Myo6	1.62127e-88	0.370695	0.328	0.098	3.02756e-84
Mdfi	3.07978e-88	0.257697	0.233	0.058	5.75119e-84
Fdx1	3.51127e-88	0.513693	0.605	0.299	6.55695e-84
Dstn	7.34713e-88	0.747211	0.822	0.569	1.372e-83
Acot13	1.34771e-87	0.400963	0.482	0.193	2.5167e-83
Hspa1b	1.92885e-87	0.390773	0.501	0.201	3.60193e-83
Fuca2	3.17474e-87	0.262212	0.236	0.058	5.92852e-83
Acot8	3.38125e-87	0.261717	0.256	0.067	6.31415e-83
Avpi1	5.23677e-87	0.32534	0.395	0.136	9.77915e-83
Qsox1	8.23726e-87	0.552815	0.495	0.212	1.53823e-82
Prkci	1.06189e-86	0.34384	0.282	0.079	1.98298e-82
Clip4	1.5012e-86	0.338842	0.377	0.122	2.80334e-82
Atp13a3	2.27435e-86	0.45121	0.445	0.17	4.24712e-82
Atp1a1	4.80199e-86	0.484882	0.632	0.316	8.96723e-82
Slc25a25	6.79443e-86	0.295155	0.262	0.07	1.26879e-81
Mpst	1.27111e-85	0.394196	0.445	0.172	2.37367e-81
Rhou	2.42842e-85	0.448385	0.414	0.152	4.53484e-81
Ndufa7	1.6222e-84	0.646356	0.779	0.564	3.0293e-80
Rpl19	5.37449e-84	0.475127	0.903	0.861	1.00363e-79
Oard1	4.45613e-83	0.320629	0.413	0.151	8.32138e-79
Hist1h2bc	6.64711e-83	0.741814	0.581	0.31	1.24128e-78
Tsta3	1.44434e-82	0.293853	0.379	0.132	2.69717e-78
Rnf103	1.46255e-82	0.351149	0.351	0.116	2.73117e-78
Akap9	4.78272e-82	0.557779	0.658	0.366	8.93125e-78
Abhd2	6.28494e-82	0.545396	0.312	0.099	1.17365e-77
Cox4i1	1.49748e-81	0.597981	0.848	0.766	2.7964e-77
Adss	3.92885e-81	0.385942	0.474	0.195	7.33673e-77
Vps13a	8.55569e-81	0.280094	0.37	0.124	1.59769e-76
Arid5b	1.95019e-80	0.627322	0.59	0.285	3.64179e-76
Pik3c2a	2.65316e-80	0.3676	0.341	0.112	4.95451e-76
Hsp90ab1	3.67726e-80	0.477802	0.94	0.878	6.86691e-76
Ppia	9.50994e-80	0.545877	0.902	0.823	1.77589e-75
Rps19	1.37564e-79	0.568831	0.9	0.863	2.56887e-75
Grhpr	1.54941e-79	0.288538	0.326	0.106	2.89337e-75
Adam10	4.6649e-79	0.46586	0.476	0.197	8.71123e-75
Taldo1	6.39679e-79	0.522107	0.682	0.388	1.19454e-74
H2afj	2.7566e-78	0.651629	0.639	0.378	5.14767e-74
Mrpl14	4.63053e-78	0.557878	0.643	0.383	8.64704e-74
Actn4	5.57734e-77	0.404896	0.696	0.377	1.04151e-72
Msrb1	8.06493e-77	0.582804	0.579	0.291	1.50605e-72
Ctbp2	8.57888e-77	0.311894	0.406	0.153	1.60202e-72
Dalrd3	1.57694e-76	0.26213	0.285	0.086	2.94477e-72
Ubald2	1.99354e-76	0.392753	0.551	0.259	3.72274e-72
Rps28	2.61745e-76	0.583633	0.869	0.723	4.88783e-72
Chmp2b	3.66306e-76	0.387037	0.515	0.229	6.8404e-72
Klf6	1.31195e-75	0.905598	0.795	0.655	2.44993e-71
Znrf1	5.26187e-74	0.329036	0.399	0.154	9.82601e-70
Traf3ip2	5.61487e-74	0.26206	0.241	0.067	1.04852e-69
Cdk8	9.38373e-74	0.352247	0.369	0.134	1.75232e-69
Rpl24	1.02187e-73	0.449224	0.901	0.833	1.90824e-69
Polb	1.07299e-73	0.352672	0.399	0.149	2.0037e-69
Rin2	2.76624e-73	0.497467	0.463	0.201	5.16568e-69
Trp53inp1	4.03773e-72	0.317165	0.229	0.062	7.54006e-68
Aktip	5.19696e-72	0.342832	0.372	0.136	9.70481e-68
Slc25a30	9.46351e-72	0.267058	0.213	0.055	1.76722e-67
Atp6v1g1	1.31712e-71	0.515156	0.781	0.565	2.45958e-67
Rpl11	3.0269e-71	0.486241	0.894	0.79	5.65243e-67
Pomgnt1	7.3597e-71	0.258706	0.309	0.104	1.37435e-66
Mgst3	1.43561e-70	0.348099	0.506	0.234	2.68086e-66
Cgnl1	2.99373e-70	0.266465	0.28	0.088	5.59049e-66
Tmbim6	7.79907e-70	0.571083	0.819	0.64	1.4564e-65
Mark2	8.23647e-70	0.378618	0.484	0.213	1.53808e-65
Adipor1	1.83655e-69	0.480021	0.615	0.339	3.42958e-65
Gm26699	1.88987e-69	0.293694	0.273	0.085	3.52915e-65
Pkig	3.88317e-69	0.402932	0.559	0.284	7.25143e-65
Eef1d	4.21231e-69	0.535035	0.841	0.626	7.86606e-65
Taz	9.17906e-69	0.278838	0.347	0.124	1.7141e-64
Pdcd4	1.05897e-68	0.304654	0.416	0.164	1.97752e-64
Jund	1.57373e-68	0.544158	0.894	0.799	2.93878e-64
Nit1	3.33332e-68	0.268565	0.28	0.089	6.22464e-64
Igbp1	5.8354e-68	0.361806	0.484	0.214	1.0897e-63
Sox4	1.84538e-67	0.646027	0.534	0.266	3.44607e-63
Cbr1	1.94376e-67	0.376839	0.491	0.223	3.62978e-63
Gpbp1l1	2.69974e-67	0.25532	0.33	0.115	5.0415e-63
Csrnp1	3.15166e-67	0.287143	0.326	0.114	5.8854e-63
Atp6v1a	3.44556e-67	0.364498	0.48	0.214	6.43423e-63
Rnf130	1.18382e-66	0.392667	0.576	0.289	2.21067e-62
Rps8	1.26291e-66	0.497167	0.872	0.819	2.35835e-62
Zfp36	1.33704e-66	0.522388	0.753	0.488	2.49679e-62
Msc	2.67379e-66	0.343333	0.231	0.068	4.99304e-62
Naxd	2.92249e-66	0.447864	0.593	0.324	5.45746e-62
Rnf149	6.38025e-66	0.303259	0.368	0.143	1.19145e-61
Ormdl2	7.59071e-66	0.279907	0.407	0.165	1.41749e-61
Ndufa6	1.09731e-65	0.477061	0.767	0.521	2.04912e-61
Rps5	5.10094e-65	0.483069	0.911	0.863	9.52549e-61
Eif3m	6.18889e-65	0.444537	0.73	0.455	1.15571e-60
Nop53	7.29478e-65	0.462937	0.743	0.461	1.36223e-60
Higd2a	1.56782e-64	0.426128	0.648	0.374	2.92775e-60
Rpl8	1.57892e-64	0.449802	0.884	0.847	2.94847e-60
Fam173a	4.00766e-64	0.31771	0.529	0.254	7.48391e-60
Rnf122	6.63311e-64	0.366875	0.278	0.094	1.23867e-59
Rps27a	7.0644e-64	0.416277	0.902	0.849	1.31921e-59
Rps7	1.0724e-63	0.439957	0.902	0.819	2.0026e-59
Rps26	2.66251e-63	0.45825	0.888	0.748	4.97198e-59
Rpl35a	3.77794e-63	0.421426	0.907	0.866	7.05492e-59
Tcea3	4.28478e-63	0.283506	0.287	0.097	8.0014e-59
Tomm20	5.04938e-63	0.436849	0.735	0.483	9.4292e-59
Emp2	7.38668e-63	0.31118	0.522	0.247	1.37939e-58
Tmem57	1.07696e-62	0.349007	0.384	0.154	2.01112e-58
Isoc1	1.21284e-62	0.359998	0.34	0.131	2.26486e-58
Pabpn1	3.58143e-62	0.278318	0.324	0.119	6.68796e-58
Park7	5.05387e-62	0.402487	0.789	0.569	9.4376e-58
Ddx5	9.34514e-62	0.439596	0.913	0.766	1.74511e-57
Ring1	1.02056e-61	0.29345	0.355	0.138	1.90579e-57
Gsr	1.36377e-61	0.331635	0.358	0.141	2.54671e-57
Xist	1.44832e-60	0.501147	0.872	0.77	2.70459e-56
Tsc22d2	5.25535e-60	0.417921	0.43	0.191	9.81384e-56
Chchd5	1.04744e-59	0.272361	0.331	0.126	1.956e-55
Rbm4b	1.33515e-59	0.348415	0.461	0.21	2.49326e-55
Chd6	1.47934e-59	0.306771	0.499	0.231	2.76252e-55
Taf13	2.44974e-59	0.256596	0.369	0.15	4.57464e-55
Rps11	3.10537e-59	0.380795	0.908	0.861	5.79896e-55
Pycard	4.11155e-59	0.256199	0.493	0.231	7.67792e-55
Rps10	6.43841e-59	0.458492	0.9	0.829	1.20231e-54
Tmem123	9.26756e-59	0.348596	0.535	0.272	1.73062e-54
Rnaseh2a	1.33012e-58	0.258953	0.301	0.109	2.48388e-54
Nr2f6	3.36195e-58	0.328067	0.449	0.208	6.2781e-54
Tmsb4x	7.19925e-58	1.22843	0.802	0.699	1.34439e-53
Rmnd5a	8.9071e-58	0.268122	0.336	0.129	1.66331e-53
Qars	1.85728e-57	0.304157	0.396	0.17	3.46828e-53
Bhlhe40	3.10232e-57	0.379864	0.457	0.215	5.79328e-53
Cebpzos	3.87548e-57	0.282876	0.38	0.16	7.23707e-53
Cox17	4.9162e-57	0.321414	0.425	0.193	9.1805e-53
Echdc2	6.70313e-57	0.276656	0.247	0.082	1.25174e-52
Rpl15	7.09162e-57	0.423337	0.88	0.806	1.32429e-52
Skp1a	1.00183e-56	0.397938	0.615	0.352	1.87082e-52
Mrpl24	1.37616e-56	0.356055	0.597	0.332	2.56983e-52
Ndel1	1.62896e-56	0.48558	0.593	0.344	3.04191e-52
Alad	2.27692e-56	0.259093	0.295	0.109	4.25192e-52
Dnajb4	2.94044e-56	0.307128	0.422	0.186	5.49097e-52
Rplp2	3.04958e-56	0.417088	0.878	0.743	5.69478e-52
Fam71a	1.00335e-55	0.338093	0.369	0.153	1.87365e-51
Rps17	1.68768e-55	0.447032	0.888	0.778	3.15157e-51
Gadd45a	2.07351e-55	0.322046	0.388	0.165	3.87207e-51
Gas6	3.74126e-55	0.674729	0.548	0.322	6.98642e-51
1110008P14Rik	4.6541e-55	0.318315	0.438	0.207	8.69106e-51
Hadhb	4.82532e-55	0.338476	0.586	0.31	9.01081e-51
Cnn3	6.73667e-55	0.526213	0.691	0.455	1.25801e-50
Slc25a17	8.5157e-55	0.314035	0.403	0.18	1.59022e-50
Tmem205	1.24624e-54	0.359705	0.538	0.282	2.32724e-50
Arid5a	1.26209e-54	0.296633	0.384	0.161	2.35682e-50
Slmap	1.82563e-54	0.286114	0.451	0.207	3.40919e-50
Bzw2	2.01442e-54	0.301148	0.428	0.194	3.76172e-50
Rpl7	2.34381e-54	0.454092	0.891	0.83	4.37682e-50
Hspa2	3.01503e-54	0.294306	0.258	0.088	5.63027e-50
Sumo1	3.8062e-54	0.47801	0.721	0.497	7.10771e-50
Rps13	4.15739e-54	0.395519	0.885	0.834	7.76351e-50
Ppp1cb	5.02872e-54	0.378642	0.669	0.396	9.39063e-50
Rpl13a	5.21005e-54	0.473576	0.775	0.552	9.72925e-50
Rpl39	2.08312e-53	0.4278	0.872	0.77	3.89002e-49
Smarca4	3.50324e-53	0.283851	0.421	0.192	6.54196e-49
Cox7a2l	5.17204e-53	0.391786	0.85	0.666	9.65826e-49
Ier3	6.1814e-53	0.535078	0.595	0.333	1.15432e-48
Tpm1	6.33848e-53	0.442799	0.699	0.423	1.18365e-48
Aig1	6.54608e-53	0.265296	0.493	0.239	1.22241e-48
Cox8a	3.2255e-52	0.505983	0.807	0.692	6.02329e-48
Rnpep	5.59617e-52	0.286005	0.33	0.136	1.04503e-47
Tnfrsf12a	6.18756e-52	0.308856	0.468	0.223	1.15547e-47
Rpl23a	2.21659e-51	0.459421	0.907	0.819	4.13927e-47
Ptbp3	3.33591e-51	0.360857	0.566	0.309	6.22949e-47
Man1a2	3.51001e-51	0.373937	0.546	0.297	6.5546e-47
Ubxn1	2.02879e-50	0.393405	0.71	0.488	3.78856e-46
Hprt	3.18492e-50	0.343477	0.511	0.267	5.94753e-46
Fat1	3.55106e-50	0.271916	0.28	0.107	6.63124e-46
Snrnp70	1.35376e-49	0.360329	0.72	0.473	2.528e-45
Vgll4	1.61432e-49	0.272303	0.478	0.229	3.01458e-45
Hmgn1	3.06465e-49	0.41769	0.797	0.6	5.72293e-45
Prdx3	7.02414e-49	0.272394	0.5	0.256	1.31169e-44
Mllt10	7.30429e-49	0.277894	0.456	0.221	1.364e-44
Csad	8.45225e-49	0.268603	0.379	0.171	1.57837e-44
Eif1a	9.34099e-49	0.313793	0.581	0.316	1.74434e-44
Rps9	1.48655e-48	0.409611	0.891	0.836	2.77599e-44
G6pc3	1.82001e-48	0.255435	0.308	0.126	3.39868e-44
Pa2g4	1.94589e-48	0.282741	0.567	0.311	3.63375e-44
Rnf6	2.23997e-48	0.254162	0.424	0.202	4.18292e-44
Rpl13	3.10494e-48	0.378273	0.914	0.883	5.79817e-44
Prmt1	3.16697e-48	0.320733	0.577	0.319	5.91399e-44
Pnrc1	3.37791e-48	0.439531	0.773	0.575	6.30791e-44
Thap3	3.37828e-48	0.274613	0.418	0.192	6.3086e-44
Phb2	5.12986e-48	0.350353	0.661	0.42	9.57951e-44
Gsto1	6.65124e-48	0.28571	0.341	0.149	1.24205e-43
Rpl21	8.54253e-48	0.400804	0.886	0.806	1.59523e-43
Hagh	8.82864e-48	0.272983	0.441	0.217	1.64866e-43
Stk11	9.58233e-48	0.271377	0.501	0.26	1.7894e-43
Uqcr11	1.22406e-47	0.464621	0.683	0.475	2.28581e-43
Prdx6	1.57128e-47	0.503618	0.714	0.534	2.93421e-43
Arpc5l	2.09554e-47	0.33334	0.562	0.326	3.91321e-43
Anxa4	4.19465e-47	0.310418	0.5	0.265	7.8331e-43
Tmbim4	9.09985e-47	0.378239	0.593	0.356	1.69931e-42
Mkln1	9.89319e-47	0.260385	0.533	0.287	1.84745e-42
Mdh1	3.03313e-46	0.346999	0.654	0.407	5.66407e-42
Alg14	5.03674e-46	0.25621	0.366	0.168	9.40561e-42
Ier5	6.92643e-46	0.541987	0.568	0.345	1.29344e-41
Hspa4	9.09965e-46	0.352608	0.55	0.306	1.69927e-41
Cttn	1.46774e-45	0.316688	0.524	0.282	2.74087e-41
Fkbp4	1.69796e-45	0.273042	0.594	0.332	3.17076e-41
Maff	3.10607e-45	0.41758	0.314	0.138	5.80028e-41
Arhgap5	3.38414e-45	0.34075	0.566	0.322	6.31954e-41
Foxp1	6.58581e-45	0.308432	0.643	0.369	1.22983e-40
Rpl28	7.57308e-45	0.398216	0.868	0.813	1.4142e-40
2410015M20Rik	2.82337e-44	0.364886	0.659	0.444	5.27237e-40
Ssu72	4.55246e-44	0.285361	0.606	0.364	8.50126e-40
G3bp2	4.75935e-44	0.373172	0.603	0.375	8.88761e-40
Rps15	7.56297e-44	0.364158	0.883	0.813	1.41231e-39
Hspa1a	7.73746e-44	0.53807	0.488	0.271	1.44489e-39
Hes1	8.66741e-44	0.375196	0.477	0.249	1.61855e-39
Snw1	1.39347e-43	0.277041	0.586	0.335	2.60217e-39
Eif3k	1.49188e-43	0.368618	0.79	0.608	2.78593e-39
Rps21	1.57817e-43	0.359132	0.862	0.746	2.94708e-39
Rps3a1	6.05425e-43	0.33778	0.916	0.865	1.13057e-38
Ralbp1	2.23217e-42	0.35054	0.765	0.557	4.16835e-38
Uqcrfs1	4.02094e-42	0.261599	0.642	0.402	7.50871e-38
Dnajb1	9.80582e-42	0.556891	0.549	0.329	1.83114e-37
Rpl36a	1.26774e-41	0.375764	0.798	0.579	2.36737e-37
Vmp1	1.34042e-41	0.330595	0.466	0.252	2.50309e-37
Zmiz1	2.39644e-41	0.299148	0.48	0.257	4.4751e-37
Hectd1	4.8846e-41	0.326771	0.598	0.37	9.12151e-37
Psmd3	9.8718e-41	0.262182	0.495	0.265	1.84346e-36
Slc3a2	1.39919e-40	0.411604	0.589	0.354	2.61284e-36
Mif	1.41273e-40	0.312476	0.636	0.4	2.63812e-36
Prdx2	1.75422e-40	0.466495	0.731	0.58	3.27583e-36
Actg1	3.29548e-40	0.351291	0.908	0.758	6.15397e-36
Tomm7	5.47353e-40	0.342246	0.705	0.491	1.02213e-35
Rpl36al	6.84827e-40	0.305658	0.55	0.327	1.27885e-35
H2-T23	7.34492e-40	0.34242	0.665	0.428	1.37159e-35
Stat3	7.97739e-40	0.335965	0.639	0.396	1.4897e-35
Rpl5	1.0502e-39	0.414973	0.878	0.784	1.96115e-35
Npm1	1.12618e-39	0.385872	0.852	0.689	2.10303e-35
Srrm1	1.19154e-39	0.294367	0.664	0.448	2.22509e-35
Itfg1	1.22101e-39	0.277563	0.443	0.232	2.28012e-35
Rpl29	1.63783e-39	0.357215	0.828	0.69	3.05849e-35
Rpl34	2.14133e-39	0.326072	0.885	0.84	3.99873e-35
Rps23	2.77938e-39	0.339435	0.91	0.886	5.19022e-35
Rev3l	3.23764e-39	0.261153	0.308	0.138	6.04597e-35
Pcf11	3.45032e-39	0.301686	0.451	0.243	6.44313e-35
S100a1	9.64279e-39	0.304079	0.597	0.369	1.80069e-34
Zc2hc1a	9.85352e-39	0.316287	0.345	0.163	1.84005e-34
Rplp0	1.2393e-38	0.374111	0.855	0.827	2.31427e-34
Pfdn2	1.67297e-38	0.274522	0.664	0.442	3.1241e-34
Irf2bpl	1.68875e-38	0.274881	0.5	0.268	3.15357e-34
Csnk1a1	2.65362e-38	0.320026	0.778	0.592	4.95538e-34
Maea	8.69417e-38	0.253864	0.43	0.225	1.62355e-33
Ebpl	1.07996e-37	0.250002	0.438	0.227	2.01672e-33
Bclaf1	1.09756e-37	0.276854	0.655	0.427	2.04958e-33
Lgals3	1.29463e-37	0.44222	0.46	0.271	2.41758e-33
Rp9	2.21736e-37	0.34844	0.652	0.43	4.1407e-33
Yap1	4.14028e-37	0.250921	0.313	0.145	7.73156e-33
Jmjd1c	4.91787e-37	0.323682	0.549	0.329	9.18363e-33
Slc25a39	8.78326e-37	0.284	0.458	0.252	1.64019e-32
Tra2a	1.09809e-36	0.276582	0.615	0.371	2.05058e-32
1810037I17Rik	1.42371e-36	0.371123	0.702	0.519	2.65864e-32
Tgfb3	1.76664e-36	0.280517	0.251	0.107	3.29902e-32
Ubn2	3.15377e-36	0.306827	0.444	0.238	5.88935e-32
Ndufa4	4.7873e-36	0.34016	0.792	0.633	8.9398e-32
Rpl31	1.64756e-35	0.34975	0.818	0.666	3.07665e-31
Thoc2	1.93211e-35	0.28755	0.571	0.351	3.60803e-31
Unc45a	3.76733e-35	0.272687	0.251	0.106	7.0351e-31
Tceal9	7.93501e-35	0.543149	0.721	0.533	1.48178e-30
Eif4b	1.53483e-34	0.267077	0.611	0.38	2.86614e-30
Tubb4b	1.58614e-34	0.42428	0.655	0.446	2.96195e-30
Rpl7a	1.6777e-34	0.314638	0.702	0.491	3.13294e-30
Atp5d	2.77794e-34	0.31674	0.767	0.606	5.18753e-30
Psme1	3.99986e-34	0.293114	0.653	0.444	7.46934e-30
Gm9493	9.98863e-34	0.257624	0.435	0.241	1.86528e-29
Deptor	2.39863e-33	0.389634	0.274	0.128	4.4792e-29
Egr2	2.65705e-33	0.362849	0.281	0.133	4.96177e-29
Malat1	5.81757e-33	0.280222	0.952	0.895	1.08637e-28
Prdx5	6.15205e-33	0.339336	0.718	0.569	1.14883e-28
Cct4	8.22385e-33	0.282007	0.687	0.466	1.53572e-28
Atp6v1f	1.26077e-32	0.298154	0.714	0.543	2.35437e-28
Rpl38	2.09724e-32	0.291912	0.828	0.682	3.91638e-28
Rpl12	5.31924e-32	0.4456	0.872	0.79	9.93315e-28
Dst	1.02804e-31	0.338256	0.621	0.4	1.91976e-27
Cct2	1.69584e-31	0.268788	0.621	0.399	3.16681e-27
Rnh1	1.7182e-31	0.324782	0.676	0.482	3.20857e-27
Ncl	2.04769e-31	0.352079	0.793	0.592	3.82386e-27
Rps2	2.44036e-31	0.311258	0.83	0.741	4.55713e-27
Pgp	5.70873e-31	0.353437	0.456	0.268	1.06605e-26
Atp5c1	1.64665e-30	0.302652	0.762	0.614	3.07495e-26
Eif3i	1.74119e-30	0.269403	0.729	0.526	3.2515e-26
Uqcrh	1.92452e-30	0.270907	0.82	0.701	3.59384e-26
Rps25	2.3148e-30	0.302055	0.874	0.804	4.32266e-26
Rpl22	2.47823e-30	0.311937	0.855	0.77	4.62785e-26
Pik3r1	3.1629e-30	0.476027	0.522	0.33	5.9064e-26
Ubl5	3.24497e-30	0.309959	0.698	0.518	6.05966e-26
Lmna	5.6015e-30	0.365615	0.729	0.541	1.04602e-25
2010111I01Rik	9.77315e-30	0.291337	0.286	0.138	1.82504e-25
Cox6b1	1.2561e-29	0.360292	0.732	0.61	2.34565e-25
Ogfrl1	1.37331e-29	0.266527	0.202	0.085	2.56453e-25
Pir	1.73292e-29	0.37005	0.32	0.167	3.23606e-25
Ubc	2.05684e-29	0.607945	0.754	0.653	3.84094e-25
Tra2b	8.13429e-29	0.28965	0.667	0.464	1.519e-24
Rps27l	4.09713e-28	0.33479	0.724	0.57	7.65097e-24
Hnrnpa1	5.57277e-28	0.280127	0.664	0.464	1.04066e-23
Cox7c	7.67549e-28	0.329172	0.757	0.608	1.43332e-23
Pomp	1.91803e-27	0.306672	0.697	0.542	3.58172e-23
Tspan3	3.16572e-27	0.292098	0.652	0.47	5.91166e-23
Use1	4.73374e-27	0.273915	0.667	0.473	8.83978e-23
Gabarapl2	5.51555e-27	0.254386	0.676	0.493	1.02997e-22
Chd4	1.33391e-26	0.255076	0.643	0.451	2.49094e-22
H3f3a	2.07528e-26	0.266671	0.857	0.757	3.87538e-22
Ube2b	1.50556e-25	0.257323	0.704	0.521	2.81148e-21
Pde4b	2.49803e-25	0.269589	0.203	0.093	4.66481e-21
Rhob	3.57311e-25	0.306272	0.637	0.455	6.67242e-21
Lamtor2	3.95446e-25	0.267467	0.654	0.499	7.38457e-21
Spcs2	6.53391e-25	0.261929	0.696	0.54	1.22014e-20
Fam3c	6.85368e-24	0.305737	0.427	0.261	1.27986e-19
Gadd45g	9.43842e-22	0.524315	0.524	0.379	1.76253e-17
Atp5b	8.56147e-21	0.256656	0.765	0.64	1.59877e-16
Srrm2	8.77188e-21	0.258586	0.818	0.688	1.63806e-16
Gpx4	4.04573e-20	0.255597	0.791	0.7	7.555e-16
Acta2	4.29083e-20	1.26322	0.246	0.14	8.0127e-16
Ctsd	8.18329e-17	0.296158	0.724	0.593	1.52815e-12
Tagln	3.97466e-15	0.624622	0.22	0.129	7.42227e-11
App	2.68907e-14	0.314257	0.756	0.665	5.02156e-10
Dbi	4.021e-13	0.557962	0.598	0.528	7.50882e-09
Iigp1	7.49358e-13	0.268528	0.394	0.283	1.39935e-08
Pxdc1	1.32585e-12	0.351766	0.252	0.163	2.4759e-08
Rack1	2.44089e-12	0.352509	0.834	0.774	4.55812e-08
Nupr1	4.07585e-09	0.660253	0.523	0.476	7.61125e-05
Cebpb	1.90333e-08	0.340812	0.55	0.467	0.000355428
Cited2	3.54227e-08	0.343789	0.429	0.34	0.000661484
Gas1	9.91226e-08	0.285345	0.278	0.406	0.00185102
Hspa8	7.84063e-07	0.256996	0.746	0.719	0.0146416
Mfge8	1.39043e-05	1.16397	0.461	0.487	0.259649
Cxcl14	0.000275138	0.778025	0.149	0.221	1
Palld	0.0110657	0.470336	0.233	0.285	1
Tpm2	0.733831	1.12972	0.186	0.208	1

## Sheet: Schwann
	p_val	avg_logFC	pct.1	pct.2	p_val_adj
Mpz	0	4.3814	0.559	0.011	0
Mbp	0	3.73961	0.748	0.068	0
Kcna1	0	3.31898	0.77	0.002	0
Plp1	0	3.25896	0.823	0.015	0
Cryab	0	2.8517	0.915	0.31	0
Gatm	0	2.79809	0.793	0.008	0
Sfrp5	0	2.7402	0.486	0.007	0
Cnp	0	2.68512	0.785	0.119	0
Mal	0	2.60254	0.712	0.004	0
Vwa1	0	2.50568	0.695	0.116	0
Gfra3	0	2.41014	0.559	0.003	0
Art3	0	2.05156	0.714	0.068	0
Kcna2	0	2.03215	0.533	0.015	0
Cd59a	0	1.98725	0.68	0.096	0
S100b	0	1.96622	0.569	0.06	0
Aspa	0	1.91555	0.582	0.043	0
Ank3	0	1.88981	0.58	0.051	0
Cdh19	0	1.87831	0.512	0.015	0
Gpr37l1	0	1.82134	0.499	0.001	0
Sostdc1	0	1.78327	0.433	0.001	0
Nrn1	0	1.76878	0.486	0.003	0
Cadm4	0	1.74687	0.501	0.009	0
Egfl8	0	1.64453	0.458	0.026	0
Plekhb1	0	1.58623	0.429	0.015	0
Chl1	0	1.58	0.433	0.016	0
Cadm1	0	1.56052	0.465	0.018	0
Klk8	0	1.50784	0.424	0.027	0
Hmgcs2	0	1.48854	0.448	0.026	0
Tspan15	0	1.42233	0.475	0.038	0
Aatk	0	1.40918	0.416	0.01	0
Fabp7	0	1.33778	0.339	0.004	0
Fcgr2b	0	1.32382	0.316	0.002	0
Sox10	0	1.2916	0.39	0.009	0
Cmtm5	0	1.28482	0.371	0.001	0
Foxd3	0	1.27265	0.348	0.001	0
Snca	0	1.24348	0.36	0.004	0
L1cam	0	1.24091	0.371	0.008	0
Ptprz1	0	1.21706	0.358	0.005	0
Wnt6	0	1.21462	0.36	0.013	0
Cadm2	0	1.17852	0.299	0.001	0
Erbb3	0	1.16752	0.369	0.023	0
Ntng1	0	1.11304	0.275	0.011	0
Adam11	0	1.10906	0.32	0.009	0
Ttyh1	0	1.1055	0.35	0.003	0
Csmd1	0	1.09531	0.335	0.016	0
Slitrk6	0	1.08245	0.309	0.002	0
Kcna6	0	1.05627	0.296	0.001	0
Dlgap1	0	1.04314	0.322	0.008	0
Slc35f1	0	1.04138	0.307	0.003	0
Gm2115	0	1.03874	0.316	0.001	0
Gas2l3	0	1.03219	0.252	0.012	0
Dhh	0	1.01689	0.275	0.013	0
Gjc3	0	1.01496	0.258	0.001	0
Rxrg	0	0.988221	0.288	0.011	0
Fam89a	0	0.96586	0.286	0.014	0
Zfp536	0	0.946287	0.29	0.001	0
Mboat2	0	0.942783	0.264	0.012	0
Edil3	0	0.929127	0.26	0.002	0
Nkain4	0	0.886114	0.267	0.012	0
Gal3st1	0	0.878483	0.237	0.001	0
Rasgef1c	0	0.841953	0.239	0.003	0
Insc	0	0.841641	0.258	0.002	0
Moxd1	0	0.839704	0.26	0.003	0
Itgb4	7.74327e-305	1.18933	0.33	0.025	1.44598e-300
Itgb8	3.29547e-294	0.811897	0.222	0.01	6.15396e-290
Ncam1	5.37901e-285	1.24665	0.384	0.037	1.00448e-280
Adgrg6	1.97048e-282	0.814025	0.239	0.013	3.67967e-278
Gfra2	3.04349e-277	1.16168	0.418	0.046	5.68342e-273
Ndrg1	6.2138e-269	2.01618	0.748	0.184	1.16036e-264
Matn2	1.41459e-268	2.22233	0.691	0.159	2.6416e-264
Sema3b	1.6722e-265	1.60449	0.582	0.102	3.12267e-261
Cd9	8.47539e-257	2.23998	0.966	0.5	1.58269e-252
Nkd2	4.34971e-252	0.929109	0.264	0.019	8.12265e-248
Pdgfa	8.30624e-248	1.68523	0.557	0.1	1.55111e-243
Sbspon	6.62154e-245	1.13202	0.245	0.016	1.23651e-240
Gpm6b	3.44669e-230	2.22584	0.817	0.323	6.43635e-226
Matn4	9.65912e-215	0.906761	0.26	0.022	1.80374e-210
Shpk	4.37457e-213	0.797773	0.215	0.015	8.16908e-209
Sox6	2.89085e-211	0.748064	0.215	0.015	5.39838e-207
Lpcat2	6.76914e-207	0.770754	0.273	0.025	1.26407e-202
Hbegf	2.07241e-200	1.27801	0.392	0.057	3.87001e-196
Alcam	1.39513e-198	0.913455	0.309	0.034	2.60526e-194
Dbi	1.46374e-196	2.46673	0.891	0.521	2.73339e-192
Cyp2j9	4.2955e-195	1.01459	0.303	0.034	8.02142e-191
Lgi4	3.17246e-188	1.32715	0.452	0.083	5.92425e-184
Ptn	8.11724e-187	0.591447	0.527	0.101	1.51581e-182
Paqr6	2.47075e-181	0.964437	0.305	0.036	4.61388e-177
Iqgap2	7.74538e-180	1.2498	0.412	0.07	1.44637e-175
Prnp	9.18243e-180	2.72037	0.795	0.379	1.71473e-175
Stmn1	1.79703e-171	1.53601	0.588	0.144	3.35577e-167
Retreg1	1.90704e-167	0.914199	0.318	0.043	3.56121e-163
Ngfr	1.11187e-165	0.974759	0.247	0.026	2.0763e-161
Epb41l4b	3.00821e-161	0.742378	0.215	0.02	5.61754e-157
Csrp1	1.44658e-156	1.21574	0.772	0.308	2.70134e-152
Fign	4.37153e-150	0.806704	0.249	0.029	8.16339e-146
Pou3f1	1.68377e-145	1.05391	0.224	0.024	3.14426e-141
Fxyd1	3.10128e-145	1.69446	0.861	0.576	5.79133e-141
Itga6	8.34643e-145	1.00796	0.392	0.073	1.55861e-140
Sfrp1	9.9606e-145	1.43777	0.51	0.132	1.86004e-140
S100a4	2.86972e-140	1.72016	0.542	0.158	5.35891e-136
Pmp22	2.86474e-139	2.64489	0.849	0.538	5.34962e-135
Mcam	1.0371e-133	0.882481	0.345	0.061	1.93667e-129
Cdh2	1.25074e-132	0.740846	0.224	0.026	2.33564e-128
Sorbs2	1.65473e-123	0.865206	0.341	0.064	3.09003e-119
Malat1	5.62226e-122	0.893735	0.951	0.896	1.0499e-117
Hspb2	7.43268e-119	0.889921	0.307	0.054	1.38798e-114
Fgl2	1.45547e-117	1.78406	0.606	0.227	2.71795e-113
Grb14	1.24139e-115	0.961008	0.354	0.076	2.31817e-111
Stard13	1.07179e-114	0.927143	0.32	0.062	2.00146e-110
Mmp15	7.8405e-114	0.719472	0.237	0.034	1.46414e-109
Dmd	3.15111e-111	0.891389	0.365	0.08	5.88439e-107
Scn7a	3.37022e-111	2.09715	0.612	0.279	6.29355e-107
Fbxo7	8.93377e-111	0.914092	0.345	0.074	1.66829e-106
Ldhb	7.68781e-109	1.31702	0.546	0.19	1.43562e-104
Mid1ip1	3.59342e-108	1.10688	0.456	0.133	6.71035e-104
Tns3	2.30483e-107	0.68317	0.256	0.042	4.30405e-103
Scd2	1.11006e-102	1.56332	0.61	0.262	2.07293e-98
Sorbs1	1.32934e-99	0.893691	0.388	0.096	2.4824e-95
Limch1	7.30144e-98	1.30659	0.463	0.142	1.36347e-93
Gtdc1	5.44068e-97	0.720392	0.207	0.031	1.01599e-92
Atp1a2	6.27805e-97	1.13234	0.465	0.146	1.17236e-92
Mvb12b	1.48673e-90	0.640465	0.235	0.041	2.77632e-86
Cnn3	5.02607e-89	1.10098	0.731	0.459	9.38568e-85
Cpe	1.0851e-87	0.976966	0.435	0.131	2.02631e-83
Deptor	2.96638e-87	1.031	0.414	0.127	5.53942e-83
Fabp5	3.41617e-87	0.928355	0.533	0.195	6.37936e-83
Sgcd	4.81413e-87	0.73772	0.222	0.039	8.9899e-83
Shisa4	2.40325e-86	0.798839	0.292	0.066	4.48783e-82
Apoe	3.96455e-85	1.67906	0.697	0.385	7.4034e-81
Atp6v0e2	6.41192e-84	0.680146	0.26	0.053	1.19736e-79
Itga7	1.44825e-81	0.606468	0.203	0.033	2.70447e-77
Afap1l2	7.49374e-81	0.709601	0.29	0.067	1.39938e-76
Cyp2j6	2.22186e-78	0.893565	0.35	0.101	4.14909e-74
Adam23	1.75755e-75	1.13996	0.465	0.184	3.28204e-71
Sdc4	9.63315e-74	0.981326	0.601	0.291	1.7989e-69
Tmod2	4.34119e-73	1.04092	0.495	0.202	8.10673e-69
Rtkn	5.69899e-72	0.734739	0.243	0.054	1.06423e-67
Metrn	1.26203e-71	0.810352	0.294	0.078	2.35672e-67
Ndrg2	1.02886e-70	1.0434	0.516	0.22	1.92129e-66
Myo18a	1.66298e-70	0.636338	0.224	0.046	3.10546e-66
Ccnd1	2.00951e-69	0.804597	0.316	0.087	3.75257e-65
Specc1	3.12981e-69	0.537595	0.209	0.041	5.84461e-65
Itm2a	5.42117e-69	1.07518	0.616	0.328	1.01235e-64
Snta1	6.11945e-67	0.763748	0.281	0.074	1.14275e-62
Secisbp2l	2.04409e-66	1.41097	0.429	0.168	3.81713e-62
Emp2	1.4761e-65	1.09067	0.525	0.252	2.75647e-61
Enho	1.34807e-64	0.783594	0.301	0.084	2.51739e-60
Tuba1a	2.06937e-62	1.13034	0.836	0.695	3.86435e-58
Utrn	2.77152e-60	1.01088	0.586	0.319	5.17554e-56
Prex2	4.3869e-60	0.738138	0.392	0.137	8.1921e-56
Megf9	1.05715e-59	0.841977	0.367	0.129	1.97412e-55
Pcbp4	1.4169e-59	0.962305	0.448	0.202	2.64592e-55
Endod1	4.04918e-59	0.675573	0.258	0.068	7.56144e-55
Ptpre	4.22105e-59	0.821925	0.209	0.047	7.88239e-55
Syt11	7.17322e-59	0.697449	0.279	0.079	1.33953e-54
Cystm1	9.45761e-59	0.654966	0.356	0.118	1.76612e-54
Lbh	1.41506e-58	0.877204	0.373	0.137	2.64248e-54
Gulp1	3.06857e-58	0.867013	0.405	0.158	5.73024e-54
Fam213b	6.40372e-58	0.797016	0.326	0.11	1.19583e-53
Laptm4b	2.28896e-56	0.733585	0.337	0.114	4.2744e-52
Mrgprf	1.28677e-55	0.740102	0.273	0.079	2.40292e-51
Qk	5.17882e-55	1.22989	0.612	0.375	9.67093e-51
Fez1	9.38985e-55	0.748441	0.38	0.14	1.75346e-50
Arpc1a	1.37372e-54	1.11425	0.638	0.45	2.56528e-50
Cdkn2c	5.30175e-54	0.79716	0.299	0.096	9.90048e-50
Pdlim4	1.80653e-53	1.18568	0.507	0.28	3.37352e-49
Sat1	2.20795e-53	0.985188	0.712	0.516	4.12313e-49
Anxa5	9.21395e-53	1.10708	0.804	0.664	1.72061e-48
Aldh1a1	3.56868e-52	1.20794	0.409	0.18	6.66415e-48
Stx7	1.35434e-51	0.863345	0.465	0.228	2.52909e-47
Tnik	4.10086e-51	0.535121	0.203	0.049	7.65795e-47
Gng2	6.26248e-51	0.857313	0.256	0.075	1.16946e-46
Nrp2	8.27887e-51	0.624276	0.239	0.065	1.546e-46
Dst	1.25432e-50	0.997736	0.64	0.404	2.34232e-46
Itpk1	3.60719e-49	0.676442	0.243	0.071	6.73607e-45
Col27a1	1.2609e-48	0.829429	0.335	0.128	2.35461e-44
Phlda3	1.29131e-48	0.884269	0.535	0.304	2.41139e-44
Ephx2	2.11587e-48	0.8119	0.267	0.085	3.95117e-44
Lgals3	4.75994e-46	1.57879	0.488	0.274	8.88872e-42
Tmem50a	1.75711e-45	0.752879	0.748	0.62	3.28123e-41
Tax1bp3	3.89277e-45	1.04335	0.567	0.379	7.26935e-41
H3f3b	1.11301e-44	0.577286	0.866	0.755	2.07844e-40
Slc44a1	1.21584e-44	0.863461	0.484	0.258	2.27046e-40
Dhrs1	1.37632e-44	1.09838	0.384	0.18	2.57014e-40
Itga1	4.22593e-42	0.562156	0.377	0.152	7.89151e-38
Cd81	1.58865e-41	0.609601	0.849	0.763	2.96664e-37
Ckb	1.99822e-41	0.870779	0.561	0.347	3.73148e-37
Ptprf	4.68991e-41	0.670741	0.226	0.07	8.75794e-37
Ivns1abp	4.38638e-40	0.729937	0.337	0.141	8.19113e-36
Asap2	1.12345e-39	0.921692	0.38	0.177	2.09793e-35
Bcl2	2.08922e-39	0.62238	0.32	0.128	3.90141e-35
Tpd52	2.01741e-37	0.615915	0.232	0.075	3.76731e-33
Crip2	8.5309e-37	0.668739	0.71	0.537	1.59306e-32
Gas7	9.56128e-37	0.655578	0.507	0.274	1.78547e-32
Tecr	8.72332e-36	0.719409	0.638	0.475	1.62899e-31
Msmo1	1.24427e-35	0.669895	0.222	0.073	2.32356e-31
Gab1	4.08769e-35	0.630058	0.232	0.081	7.63335e-31
Lhfpl2	5.74742e-35	0.627613	0.256	0.096	1.07327e-30
Frmd4a	3.02244e-34	0.802009	0.377	0.187	5.6441e-30
Phgdh	6.47505e-34	0.801978	0.333	0.155	1.20915e-29
Cdc42ep3	1.23535e-32	0.616276	0.294	0.118	2.30689e-28
Dag1	1.62969e-32	0.823996	0.565	0.42	3.04329e-28
Rgcc	6.04359e-32	0.428783	0.375	0.173	1.12858e-27
Cttnbp2nl	1.01209e-31	0.611142	0.249	0.096	1.88997e-27
Plce1	1.30582e-31	0.556489	0.305	0.13	2.4385e-27
Synm	1.62758e-30	0.518062	0.226	0.081	3.03934e-26
Tln2	1.99435e-30	0.650275	0.284	0.123	3.72425e-26
Sirt2	5.5647e-30	0.773934	0.48	0.303	1.03915e-25
Psat1	6.67012e-30	0.628521	0.237	0.093	1.24558e-25
Arpc1b	7.74628e-30	0.893979	0.719	0.698	1.44654e-25
Zeb2	1.07118e-29	0.878212	0.631	0.51	2.00032e-25
Col16a1	5.98896e-29	0.68436	0.33	0.162	1.11838e-24
Lamp1	8.1011e-29	0.499845	0.806	0.763	1.5128e-24
Tubb2b	1.22906e-28	0.735784	0.316	0.153	2.29515e-24
Igfbp6	1.33231e-27	0.59373	0.228	0.556	2.48795e-23
Abca8b	3.34565e-27	0.75179	0.286	0.133	6.24766e-23
Ptk2	4.38967e-27	0.61653	0.322	0.162	8.19727e-23
Prkca	9.93812e-27	0.688221	0.311	0.151	1.85585e-22
Ninj1	1.31971e-26	0.684699	0.313	0.157	2.46443e-22
Fads1	1.68682e-26	0.695222	0.318	0.161	3.14997e-22
Sema6d	1.8287e-26	0.58572	0.211	0.081	3.41491e-22
Plekha4	3.82607e-26	0.907163	0.222	0.09	7.1448e-22
Tubb5	1.3191e-25	0.926566	0.599	0.488	2.46328e-21
Agap1	2.36044e-25	0.614848	0.35	0.188	4.40789e-21
Cltb	1.41411e-24	0.70626	0.565	0.453	2.64071e-20
Col18a1	1.46978e-24	0.895295	0.422	0.27	2.74467e-20
Ccser2	8.64818e-24	0.80368	0.465	0.316	1.61496e-19
Cd200	1.97821e-23	0.427297	0.356	0.178	3.69411e-19
Sgcb	2.09071e-23	0.629807	0.337	0.187	3.9042e-19
Map3k4	3.16934e-23	0.472531	0.205	0.083	5.91842e-19
Postn	3.85678e-23	0.522498	0.571	0.399	7.20215e-19
Prss23	3.93643e-23	0.562683	0.64	0.512	7.35089e-19
Selenof	6.27746e-23	0.528339	0.742	0.741	1.17225e-18
Agrn	9.31443e-23	0.435666	0.209	0.085	1.73938e-18
Cd151	1.61102e-22	0.651756	0.529	0.408	3.00841e-18
Eif1	2.78459e-22	0.454708	0.9	0.885	5.19995e-18
Ywhae	3.25286e-22	0.586439	0.667	0.629	6.07438e-18
Tsc22d4	4.09652e-22	0.839097	0.377	0.233	7.64984e-18
Dusp6	4.48278e-22	0.523548	0.243	0.11	8.37115e-18
Pea15a	5.20842e-22	0.836402	0.465	0.328	9.7262e-18
Fxyd6	8.31744e-22	1.26675	0.277	0.147	1.5532e-17
Arhgap31	1.35181e-21	0.470021	0.328	0.172	2.52438e-17
Nr4a2	1.62205e-21	0.555786	0.22	0.092	3.02901e-17
Vgll3	3.41146e-21	0.561399	0.339	0.191	6.37056e-17
Dynlrb1	4.85711e-21	0.606313	0.672	0.612	9.07017e-17
Nek1	9.33582e-21	0.636781	0.203	0.087	1.74337e-16
Sparc	1.26636e-20	0.395791	0.859	0.743	2.36481e-16
Tspan17	3.40015e-20	0.631974	0.32	0.181	6.34944e-16
Tmem237	9.8337e-20	0.477516	0.264	0.132	1.83634e-15
Slc31a2	1.19784e-19	0.443501	0.26	0.127	2.23684e-15
Mocs2	4.01047e-19	0.61674	0.448	0.318	7.48916e-15
Mpc1	4.34812e-19	0.518688	0.576	0.472	8.11968e-15
Epdr1	8.73051e-19	0.528797	0.29	0.154	1.63034e-14
Slc9a3r2	2.42681e-18	0.337413	0.429	0.273	4.53182e-14
Cdkn1a	5.70132e-18	0.725806	0.454	0.309	1.06466e-13
Itgav	5.88464e-18	0.569214	0.36	0.232	1.0989e-13
Arhgef10	1.22299e-17	0.509261	0.252	0.129	2.28381e-13
Tppp3	1.29298e-17	0.479867	0.599	0.452	2.4145e-13
Mgll	1.60447e-17	0.31989	0.48	0.307	2.99619e-13
Fth1	7.52356e-17	0.926088	0.889	0.848	1.40495e-12
Vim	7.75952e-17	0.370815	0.861	0.8	1.44901e-12
Jam3	8.78861e-17	0.640757	0.29	0.169	1.64119e-12
Map1b	9.40377e-17	0.650757	0.418	0.302	1.75606e-12
Rnf5	1.00391e-16	0.54188	0.296	0.171	1.87469e-12
Ndfip2	1.24477e-16	0.622367	0.362	0.237	2.32447e-12
Tspan3	1.63287e-16	0.555132	0.565	0.476	3.04923e-12
Nr2f2	2.50773e-16	0.691208	0.335	0.204	4.68294e-12
Efhd1	2.70438e-16	0.398862	0.309	0.168	5.05017e-12
mt-Cytb	3.73391e-16	0.818133	0.267	0.14	6.97271e-12
Pithd1	4.16109e-16	0.436707	0.215	0.107	7.77043e-12
Gamt	1.11555e-15	0.494867	0.264	0.146	2.08318e-11
2010111I01Rik	1.16899e-15	0.428959	0.262	0.142	2.18298e-11
Rsu1	1.37324e-15	0.578742	0.552	0.485	2.56438e-11
Flot1	1.69201e-15	0.639272	0.375	0.256	3.15965e-11
Ctnna1	1.99608e-15	0.516981	0.495	0.383	3.72748e-11
Nid2	2.89191e-15	0.556847	0.311	0.188	5.40035e-11
Atp6v1g1	3.08866e-15	0.48439	0.625	0.573	5.76776e-11
Pon2	3.22233e-15	0.57269	0.405	0.295	6.01738e-11
Adk	8.32741e-15	0.543436	0.356	0.236	1.55506e-10
Cfl1	1.0202e-14	0.517975	0.704	0.714	1.90513e-10
Rhoc	1.40265e-14	0.659295	0.586	0.558	2.61931e-10
Bsg	1.42237e-14	0.454767	0.721	0.715	2.65613e-10
Arl8a	2.38695e-14	0.529838	0.32	0.205	4.45739e-10
Frmd8	3.99489e-14	0.469204	0.215	0.113	7.46005e-10
Rnf7	6.48868e-14	0.632276	0.537	0.465	1.2117e-09
Map1lc3a	7.95736e-14	0.600048	0.606	0.561	1.48596e-09
Srebf1	9.98986e-14	0.513972	0.245	0.14	1.86551e-09
Cadm3	1.00593e-13	0.469492	0.328	0.201	1.87847e-09
Cuedc2	1.61271e-13	0.62525	0.405	0.3	3.01157e-09
Zfp706	1.7896e-13	0.535081	0.52	0.433	3.3419e-09
Tagln2	2.5811e-13	0.686232	0.565	0.514	4.81994e-09
Enpp5	3.29982e-13	0.406881	0.205	0.107	6.16208e-09
Mbnl2	3.83021e-13	0.514191	0.567	0.5	7.15253e-09
Vcl	6.50355e-13	0.487441	0.341	0.225	1.21447e-08
Saraf	6.65062e-13	0.454565	0.533	0.457	1.24194e-08
Cfl2	8.13729e-13	0.558113	0.405	0.309	1.51956e-08
Rap1a	1.17434e-12	0.46569	0.593	0.548	2.19296e-08
Npdc1	1.80942e-12	0.484335	0.559	0.493	3.37891e-08
Tmed10	1.86309e-12	0.407905	0.704	0.678	3.47914e-08
Tuba1b	2.42655e-12	0.57905	0.576	0.504	4.53134e-08
Itgb1	2.91702e-12	0.415021	0.646	0.64	5.44724e-08
Arl2	3.41437e-12	0.466543	0.23	0.134	6.37599e-08
Lmo4	3.62037e-12	0.469055	0.454	0.353	6.76067e-08
Plekha5	3.75614e-12	0.48116	0.267	0.166	7.01421e-08
Olfml2b	6.93114e-12	0.491335	0.448	0.342	1.29432e-07
Higd2a	7.31444e-12	0.551961	0.471	0.384	1.3659e-07
mt-Nd4	7.84083e-12	0.505281	0.294	0.173	1.4642e-07
Taf13	8.73737e-12	0.427855	0.256	0.157	1.63162e-07
AY036118	9.25944e-12	0.820126	0.582	0.495	1.72911e-07
Tmem205	2.68596e-11	0.478893	0.386	0.291	5.01576e-07
Comt	3.3475e-11	0.428065	0.58	0.509	6.25112e-07
Hmgcs1	3.89381e-11	0.890472	0.254	0.162	7.27129e-07
Ss18l2	4.53899e-11	0.54054	0.264	0.172	8.4761e-07
Calm2	5.45605e-11	0.325806	0.701	0.654	1.01886e-06
Lims2	8.55854e-11	0.298605	0.373	0.25	1.59822e-06
Mdh1	1.13731e-10	0.42245	0.501	0.416	2.12382e-06
Nop16	1.23386e-10	0.453433	0.232	0.143	2.30411e-06
Ppia	1.68006e-10	0.281011	0.838	0.826	3.13734e-06
Abi3bp	2.57096e-10	0.491817	0.512	0.421	4.801e-06
Tmbim6	3.49732e-10	0.395006	0.67	0.647	6.53089e-06
Ifit3	3.97259e-10	0.76033	0.262	0.164	7.41841e-06
Adam10	4.21449e-10	0.509158	0.303	0.207	7.87014e-06
Zfand6	4.40191e-10	0.465996	0.465	0.386	8.22013e-06
Clcn3	5.47413e-10	0.365902	0.209	0.12	1.02224e-05
Marcksl1	5.49817e-10	0.437204	0.224	0.136	1.02673e-05
Dynlt3	6.75787e-10	0.529842	0.399	0.325	1.26197e-05
Dnajc7	1.56136e-09	0.551271	0.32	0.232	2.91569e-05
Lmna	2.0411e-09	0.462611	0.603	0.548	3.81156e-05
Vapa	2.30601e-09	0.488614	0.52	0.473	4.30624e-05
Cab39l	2.76711e-09	0.481494	0.243	0.158	5.16731e-05
Sh3pxd2a	3.17448e-09	0.515209	0.256	0.175	5.92802e-05
Pmepa1	3.41113e-09	0.437058	0.399	0.315	6.36994e-05
mt-Atp6	3.87857e-09	0.53583	0.209	0.119	7.24283e-05
Raly	5.27185e-09	0.435975	0.465	0.412	9.84466e-05
Hsbp1	6.30966e-09	0.401718	0.595	0.56	0.000117827
Ptprs	6.91878e-09	0.452837	0.239	0.156	0.000129201
Slc44a2	7.53731e-09	0.357905	0.228	0.145	0.000140752
Pdzd2	8.78977e-09	0.353506	0.277	0.186	0.00016414
Fnta	9.39245e-09	0.524466	0.382	0.304	0.000175395
Cirbp	1.31043e-08	0.48294	0.352	0.27	0.000244709
Selenok	1.67834e-08	0.283786	0.706	0.733	0.000313413
Tm7sf3	1.75536e-08	0.41272	0.335	0.249	0.000327796
Tubb2a	1.79916e-08	0.579632	0.431	0.377	0.000335974
Nf1	3.08383e-08	0.457671	0.213	0.138	0.000575874
Sgce	3.22304e-08	0.371905	0.465	0.407	0.00060187
Snx7	4.20262e-08	0.381327	0.247	0.17	0.000784797
Sumo2	4.83146e-08	0.282505	0.699	0.691	0.000902226
Siva1	5.37571e-08	0.427377	0.384	0.305	0.00100386
Plscr4	7.41264e-08	0.322692	0.23	0.15	0.00138424
Tubb4b	1.00194e-07	0.421962	0.51	0.454	0.00187102
Fam129a	1.00247e-07	0.423526	0.394	0.317	0.00187202
Hsd17b12	1.05947e-07	0.416493	0.294	0.219	0.00197846
Capg	1.09967e-07	0.53107	0.512	0.494	0.00205353
Lpar1	1.211e-07	0.370777	0.424	0.354	0.00226142
C4b	1.42855e-07	0.328282	0.269	0.181	0.00266767
Fut8	1.47169e-07	0.712525	0.211	0.145	0.00274824
Cers4	1.80858e-07	0.34309	0.207	0.131	0.00337734
Clstn1	1.92144e-07	0.479153	0.328	0.254	0.0035881
1810037I17Rik	2.43141e-07	0.360309	0.571	0.526	0.00454041
Ifi27	2.53466e-07	0.41152	0.567	0.536	0.00473322
Ndufv2	2.58388e-07	0.366092	0.495	0.434	0.00482515
Selenom	2.58476e-07	0.365572	0.676	0.662	0.00482678
Pnisr	3.15358e-07	0.48148	0.431	0.372	0.005889
Ctsc	3.4341e-07	0.350103	0.26	0.179	0.00641283
mt-Co2	3.72664e-07	0.527352	0.209	0.13	0.00695912
1500011K16Rik	4.27225e-07	0.403181	0.292	0.221	0.007978
Mrpl33	4.41502e-07	0.411272	0.529	0.5	0.0082446
Tkt	4.54868e-07	0.436117	0.435	0.381	0.00849421
Dync1i2	5.15228e-07	0.375683	0.365	0.293	0.00962136
Ahnak2	5.335e-07	0.332513	0.463	0.392	0.00996257
Gas6	5.37671e-07	0.404464	0.19	0.336	0.0100405
Atp5b	6.92744e-07	0.296934	0.65	0.645	0.0129363
Sptssa	7.82599e-07	0.461179	0.482	0.449	0.0146143
Rhoa	8.05449e-07	0.285941	0.693	0.722	0.0150409
Gstm5	8.34034e-07	0.44842	0.401	0.341	0.0155747
Mif4gd	8.45914e-07	0.285418	0.207	0.135	0.0157966
App	9.03257e-07	0.308776	0.659	0.669	0.0168674
Scd1	9.62415e-07	0.612409	0.335	0.28	0.0179721
Snx1	1.0378e-06	0.379727	0.305	0.237	0.0193799
Rdm1	1.10557e-06	0.336785	0.203	0.134	0.0206454
Hadh	1.13188e-06	0.447591	0.358	0.296	0.0211368
Psma6	1.13852e-06	0.428466	0.463	0.418	0.0212607
Stard3nl	1.32252e-06	0.42302	0.352	0.285	0.0246968
Mlf2	1.35555e-06	0.394547	0.467	0.426	0.0253136
Papss1	1.39088e-06	0.487598	0.286	0.217	0.0259733
Rsrp1	1.67753e-06	0.368465	0.652	0.621	0.0313263
Emc10	1.77503e-06	0.377937	0.51	0.477	0.0331469
Srp14	1.79459e-06	0.318421	0.586	0.569	0.0335121
Zbtb38	1.87525e-06	0.3749	0.252	0.179	0.0350184
Tead1	1.90875e-06	0.429589	0.247	0.18	0.035644
Selenop	1.9659e-06	0.252766	0.706	0.669	0.0367113
Scarb2	2.69399e-06	0.358448	0.397	0.341	0.0503075
Ywhah	3.04644e-06	0.431336	0.465	0.44	0.0568893
B230118H07Rik	3.06109e-06	0.340894	0.215	0.15	0.0571627
Mcee	3.08465e-06	0.362512	0.309	0.24	0.0576028
Rnf13	3.73472e-06	0.411287	0.356	0.29	0.0697421
Card19	4.3344e-06	0.378571	0.288	0.226	0.0809405
Pla2g16	5.28952e-06	0.622035	0.367	0.309	0.0987766
Mgst3	5.52643e-06	0.342625	0.311	0.244	0.103201
Taldo1	5.63454e-06	0.3653	0.461	0.4	0.105219
Commd1	5.65891e-06	0.359232	0.394	0.357	0.105674
Rnd3	5.66732e-06	0.483435	0.301	0.238	0.105831
Atp1b3	6.85477e-06	0.536889	0.384	0.331	0.128006
Xaf1	7.06561e-06	0.379026	0.309	0.245	0.131943
Rabac1	7.78221e-06	0.281058	0.71	0.743	0.145325
Itch	8.57266e-06	0.378096	0.222	0.16	0.160086
B4gat1	9.24766e-06	0.3834	0.23	0.167	0.172691
Plec	1.18344e-05	0.36435	0.367	0.307	0.220995
Akr1a1	1.18456e-05	0.326324	0.612	0.611	0.221205
Spcs2	1.19256e-05	0.313536	0.576	0.547	0.222699
Celf2	1.38097e-05	0.299353	0.58	0.556	0.257882
Psmc3	1.41085e-05	0.353719	0.467	0.427	0.263463
Ndufb8	1.50488e-05	0.346543	0.512	0.478	0.281021
Syne2	1.67493e-05	0.376462	0.305	0.24	0.312777
Tprgl	1.74811e-05	0.392435	0.525	0.513	0.326443
Tjp1	1.78825e-05	0.393473	0.249	0.188	0.333938
Hook3	1.82976e-05	0.348086	0.433	0.392	0.341689
mt-Nd4l	1.98448e-05	0.430541	0.424	0.357	0.370582
Camk2d	1.98712e-05	0.367219	0.382	0.328	0.371075
Il10rb	1.98875e-05	0.368353	0.29	0.229	0.371379
Mindy2	2.41731e-05	0.392777	0.322	0.268	0.451409
mt-Nd5	2.54565e-05	0.376473	0.328	0.252	0.475374
Ten1	2.6073e-05	0.368375	0.228	0.17	0.486887
Pkig	2.66813e-05	0.420655	0.345	0.295	0.498246
Dpysl2	3.39328e-05	0.412807	0.375	0.325	0.63366
Tmed4	3.67144e-05	0.343232	0.281	0.224	0.685605
Serpine2	3.68649e-05	0.380014	0.252	0.192	0.688415
Capns1	3.71654e-05	0.351974	0.635	0.679	0.694027
Vamp8	3.88039e-05	0.318958	0.441	0.401	0.724624
Abca8a	4.17357e-05	0.375022	0.482	0.436	0.779372
Acyp2	4.57228e-05	0.291062	0.222	0.165	0.853827
Pebp1	4.63408e-05	0.409975	0.629	0.627	0.865368
Mff	4.69207e-05	0.334493	0.365	0.313	0.876198
Trim35	4.83619e-05	0.36666	0.36	0.308	0.90311
Hmgn3	6.23537e-05	0.400689	0.337	0.288	1
Slc12a4	6.7725e-05	0.28265	0.207	0.15	1
Hmgb1	6.83224e-05	0.287716	0.557	0.538	1
Msn	6.83296e-05	0.380602	0.475	0.476	1
Sfswap	7.72152e-05	0.336348	0.215	0.159	1
Hspb1	7.84473e-05	0.254635	0.414	0.351	1
Ube2e3	8.23769e-05	0.315887	0.348	0.295	1
Emp3	8.36162e-05	0.346846	0.606	0.637	1
Psmb7	8.63471e-05	0.367902	0.412	0.38	1
Eif1b	8.76781e-05	0.354723	0.416	0.386	1
Ppp1r18	9.52539e-05	0.318676	0.222	0.169	1
Nfic	9.91362e-05	0.344847	0.473	0.463	1
Bhlhe40	0.000129678	0.29542	0.281	0.225	1
Ndfip1	0.000147954	0.269924	0.264	0.214	1
Park7	0.000150597	0.320798	0.574	0.579	1
Cldnd1	0.000164561	0.324993	0.348	0.304	1
Maf1	0.000165108	0.313072	0.326	0.278	1
Txndc12	0.000175423	0.333954	0.262	0.215	1
Azin1	0.000177563	0.304642	0.288	0.236	1
Gpx4	0.000179321	0.280426	0.697	0.704	1
Emc7	0.000186077	0.369759	0.488	0.475	1
Pex2	0.000228924	0.365402	0.239	0.19	1
Ywhaq	0.000230036	0.263023	0.576	0.592	1
Son	0.000235175	0.274394	0.652	0.673	1
Hist1h2bc	0.000235644	0.490513	0.36	0.322	1
Hsd17b4	0.000243485	0.270344	0.252	0.2	1
Dennd5a	0.000258181	0.381734	0.281	0.235	1
Uqcr11	0.000273533	0.281111	0.522	0.484	1
Smim15	0.000273572	0.340147	0.284	0.235	1
Otud7b	0.000307241	0.362019	0.215	0.165	1
Ndufb6	0.000322628	0.296197	0.461	0.426	1
Psmb3	0.000338819	0.330377	0.486	0.474	1
Gmfb	0.000354235	0.478308	0.267	0.223	1
9530068E07Rik	0.000369576	0.328188	0.422	0.411	1
Cnbp	0.000400875	0.253217	0.638	0.662	1
Tsc22d3	0.000417752	0.418205	0.377	0.329	1
Litaf	0.000429052	0.343594	0.35	0.318	1
Pik3ip1	0.000443806	0.335354	0.22	0.17	1
Eid1	0.000484538	0.375179	0.458	0.446	1
Cdc42ep5	0.000512289	0.345221	0.286	0.243	1
Cdkn1b	0.000550515	0.5608	0.256	0.22	1
Abhd12	0.000580085	0.369414	0.203	0.158	1
Vdac3	0.000592372	0.313892	0.501	0.491	1
Cdc37l1	0.000640156	0.358337	0.239	0.194	1
Manbal	0.000644157	0.294927	0.299	0.259	1
Glo1	0.000712087	0.300739	0.362	0.325	1
Psma1	0.000723598	0.362524	0.431	0.414	1
Ccdc47	0.000739996	0.354103	0.322	0.283	1
Chrdl1	0.000762673	0.268625	0.213	0.157	1
Dhrs3	0.0008366	0.312168	0.23	0.183	1
Arhgdia	0.000849721	0.339908	0.537	0.578	1
Prdx6	0.000920124	0.300466	0.559	0.542	1
Thra	0.000937658	0.340256	0.409	0.391	1
Pgrmc1	0.000979324	0.368543	0.418	0.4	1
Dctn2	0.00112701	0.386534	0.456	0.46	1
Sh3bp5	0.00130197	0.331087	0.226	0.182	1
Zfyve21	0.00140049	0.309071	0.299	0.263	1
Ndufs5	0.00156369	0.271065	0.539	0.535	1
Clic4	0.00162271	0.301395	0.499	0.495	1
Pdlim1	0.00162439	0.266387	0.326	0.287	1
Lmbrd1	0.00185378	0.337492	0.264	0.226	1
Wbp2	0.00189867	0.316306	0.237	0.194	1
Arl6ip1	0.00198122	0.261504	0.512	0.516	1
Snx6	0.00198238	0.34871	0.392	0.369	1
Anapc16	0.00201744	0.296345	0.339	0.309	1
Tmpo	0.0020632	0.325167	0.301	0.257	1
Chmp2a	0.00206511	0.262551	0.516	0.517	1
Eif4e3	0.00210905	0.336695	0.256	0.219	1
Mapk3	0.00216874	0.392921	0.403	0.383	1
Kif3a	0.00225486	0.307927	0.209	0.172	1
Arhgap5	0.00231886	0.351805	0.354	0.332	1
Gabarapl2	0.00232903	0.282495	0.505	0.501	1
Hes1	0.00233224	0.335473	0.294	0.258	1
Cers2	0.00252168	0.315252	0.32	0.29	1
Atp2c1	0.00254481	0.266426	0.207	0.167	1
Pfdn1	0.00267404	0.322435	0.373	0.357	1
Sec62	0.00268431	0.29141	0.612	0.629	1
Ndufb4	0.00275109	0.280855	0.49	0.484	1
Josd2	0.00288302	0.417558	0.299	0.268	1
Cyc1	0.00299999	0.290491	0.405	0.381	1
Ccdc107	0.00306459	0.255561	0.23	0.192	1
Ndufv1	0.0030968	0.301829	0.348	0.321	1
Chmp5	0.00368848	0.326514	0.384	0.366	1
Arl3	0.0036963	0.31195	0.365	0.345	1
Ormdl2	0.00375898	0.256957	0.215	0.175	1
Ctnnbip1	0.00384681	0.320156	0.254	0.218	1
Selenot	0.00394251	0.294662	0.36	0.337	1
Eci1	0.00421971	0.260479	0.26	0.224	1
Hist1h1c	0.00442995	0.465579	0.22	0.186	1
Zmat5	0.00476825	0.288065	0.256	0.222	1
Rab34	0.0047918	0.353492	0.33	0.311	1
Rala	0.00510725	0.352352	0.446	0.456	1
Vgll4	0.00544987	0.254548	0.277	0.239	1
Tbcb	0.00585288	0.299108	0.407	0.398	1
Smdt1	0.0059088	0.265661	0.593	0.627	1
Itfg1	0.00602222	0.346229	0.269	0.24	1
Atp1a1	0.00625571	0.36674	0.356	0.33	1
Pgp	0.00639998	0.332945	0.305	0.276	1
Rhbdf1	0.00719924	0.252722	0.224	0.189	1
Syf2	0.0073634	0.333931	0.397	0.384	1
Atp5k	0.00750128	0.275246	0.335	0.298	1
Gdi1	0.00756976	0.275997	0.228	0.192	1
Vps28	0.00810043	0.299467	0.416	0.407	1
Asah1	0.0082361	0.285609	0.371	0.352	1
Ociad1	0.00844158	0.328169	0.386	0.37	1
Eps15	0.00865664	0.325124	0.215	0.184	1
Bnip3l	0.00872487	0.370202	0.539	0.567	1
Ap2m1	0.00885626	0.315102	0.488	0.498	1
Snx10	0.00893398	0.299176	0.245	0.216	1
Tnfrsf12a	0.00917845	0.44521	0.254	0.233	1
Polr2f	0.0095123	0.272137	0.461	0.46	1
Ndufa13	0.00955864	0.263932	0.657	0.684	1
Myl12a	0.00971437	0.361479	0.64	0.699	1
Rnf130	0.0123838	0.332978	0.318	0.301	1
Slc48a1	0.0141264	0.2972	0.254	0.226	1
Adipor1	0.0143179	0.251267	0.365	0.351	1
Ift43	0.0153181	0.298884	0.279	0.258	1
Wdr1	0.0183806	0.261702	0.345	0.333	1
Cfap36	0.0186532	0.275882	0.226	0.198	1
Vamp2	0.018766	0.250928	0.211	0.178	1
Utp11	0.019723	0.400248	0.303	0.282	1
Dock7	0.0233246	0.314627	0.264	0.24	1
Map2k1	0.0238151	0.26492	0.226	0.199	1
Commd4	0.0241311	0.267854	0.267	0.237	1
Rbx1	0.0243297	0.250117	0.557	0.59	1
Vdac2	0.0244503	0.330108	0.467	0.479	1
Nek7	0.02455	0.348093	0.252	0.227	1
Fam104a	0.0247859	0.306427	0.405	0.403	1
Evi5	0.0270016	0.358627	0.254	0.235	1
Pik3r1	0.0273038	0.285159	0.352	0.338	1
Add1	0.027673	0.287987	0.335	0.323	1
Ccdc124	0.0279348	0.268972	0.333	0.325	1
Rtn4	0.0281574	0.252115	0.557	0.613	1
Fbxl3	0.0376849	0.253696	0.23	0.208	1
Dgcr6	0.0384688	0.294382	0.245	0.227	1
Tmem9b	0.0406383	0.314934	0.29	0.279	1
Sec11c	0.04077	0.336814	0.316	0.301	1
Snapin	0.0414278	0.275924	0.273	0.255	1
Foxo1	0.0414404	0.281214	0.243	0.225	1
Fkbp3	0.0437127	0.282158	0.384	0.374	1
Cox5b	0.0486471	0.307292	0.501	0.502	1
Eapp	0.0517171	0.269109	0.264	0.248	1
Psmc1	0.0532663	0.292535	0.284	0.269	1
Mrpl13	0.0585431	0.274645	0.301	0.29	1
Cbfb	0.0603502	0.302226	0.209	0.192	1
Hnrnpr	0.0627755	0.284527	0.367	0.37	1
Cfap20	0.0643061	0.288357	0.281	0.27	1
Ppp2r2a	0.0696677	0.307976	0.32	0.318	1
Abhd14a	0.0699322	0.253198	0.247	0.231	1
Capn2	0.0718209	0.272304	0.399	0.422	1
Sgta	0.0735922	0.268332	0.322	0.315	1
Tmem256	0.0792989	0.276064	0.45	0.455	1
Paics	0.0882368	0.285267	0.307	0.306	1
Gbp7	0.0902856	0.254563	0.235	0.216	1
Ndufb3	0.0929366	0.258496	0.418	0.428	1
Rab10	0.0940852	0.265999	0.399	0.421	1
Rab5a	0.105899	0.296348	0.303	0.301	1
Taok1	0.108996	0.273814	0.322	0.322	1
Klf7	0.110145	0.274793	0.369	0.373	1
Plat	0.110203	0.276976	0.373	0.383	1
Dnajc19	0.110385	0.314698	0.371	0.382	1
Map4	0.113808	0.297408	0.296	0.299	1
Acaa2	0.114766	0.276865	0.412	0.428	1
Tmem5	0.118013	0.265359	0.271	0.267	1
Tmem234	0.119224	0.258049	0.529	0.554	1
Stk25	0.140206	0.276437	0.273	0.27	1
Acadm	0.141173	0.300018	0.288	0.281	1
Tmed7	0.145435	0.2864	0.348	0.352	1
Anxa2	0.149178	0.351188	0.608	0.675	1
Cuta	0.182752	0.261294	0.407	0.419	1
Sbds	0.194695	0.273401	0.358	0.367	1
Mrpl42	0.256866	0.250005	0.397	0.406	1
Psenen	0.257221	0.259301	0.452	0.499	1
Cat	0.263413	0.254287	0.228	0.222	1
Hikeshi	0.275809	0.271268	0.309	0.315	1
Amfr	0.279734	0.263945	0.243	0.243	1
Prpf4b	0.280072	0.326564	0.271	0.272	1
Hnrnph3	0.291042	0.266071	0.228	0.223	1
Dync1li2	0.357128	0.25929	0.209	0.206	1
Pnkd	0.365663	0.287749	0.316	0.332	1
Spop	0.409878	0.255857	0.386	0.458	1
Parva	0.475005	0.302752	0.281	0.294	1
Por	0.484932	0.254958	0.311	0.327	1
Golga7	0.487771	0.272275	0.245	0.253	1
Gbp2	0.563975	0.280527	0.217	0.248	1
Chpt1	0.586947	0.264916	0.243	0.255	1
Pja2	0.66792	0.262594	0.267	0.284	1
Elovl1	0.794577	0.381897	0.264	0.284	1
Fam96b	0.820123	0.253102	0.294	0.324	1
Gkap1	0.858132	0.288516	0.198	0.212	1
Ndufa5	0.887348	0.270378	0.384	0.426	1
2022-03-02	0.982105	0.254621	0.373	0.426	1
