# Supplementary material for: Deconstructing cold-induced brown adipocyte neogenesis in mice
Source: eLife. 2022 Jul 18;11:e80167. doi: 10.7554/eLife.80167 (PMC9348851; doi:10.7554/eLife.80167)
Supplement: Supplementary file 4. [file elife-80167-supp4.xlsx]

## Sheet: INFORMATION
Supplementary File 4. DEGs for each cluster in the reclustered WT and Adrb1 KO ASC iBAT data.
Related to Figure 5C.
List of DEGs define by Seurat by graph-based clustering. Each cluster is a new tab.
iBAT, ASCs only, WT and Adrb1 KO, CONTROL and COLD libraries.
Differentially expressed genes that define each cluster were identified using a Wilcoxon Rank Sum test in Seurat with the following parameters: min.pct = 0.20, logfc.threshold = 0.2, only.pos = TRUE.

## Sheet: ASC1
	p_val	avg_logFC	pct.1	pct.2	p_val_adj
Fabp4	0	2.0221	0.419	0.088	0
Lpl	0	1.82238	0.938	0.445	0
Col4a1	0	1.62581	0.933	0.4	0
Cxcl14	0	1.50423	0.621	0.132	0
Cxcl9	0	1.38557	0.523	0.085	0
Col4a2	0	1.3597	0.911	0.367	0
Plin2	0	1.34217	0.776	0.241	0
Tmem176b	0	1.30271	0.735	0.186	0
Apoe	0	1.2615	0.669	0.302	0
Col15a1	0	1.22937	0.912	0.353	0
Sparcl1	0	1.17671	0.89	0.487	0
Tmem176a	0	1.12168	0.653	0.161	0
Col6a3	0	1.07338	0.917	0.598	0
AW112010	0	1.03201	0.605	0.231	0
Aldoa	0	0.981382	0.84	0.506	0
Meox1	0	0.957299	0.599	0.096	0
Smoc2	0	0.925633	0.679	0.323	0
H2-D1	0	0.891898	0.88	0.706	0
H2-K1	0	0.891521	0.845	0.58	0
Thbs1	0	0.874888	0.522	0.143	0
B2m	0	0.855185	0.909	0.756	0
Mif	0	0.853978	0.667	0.318	0
Vcam1	0	0.84519	0.662	0.183	0
Bmper	0	0.841299	0.643	0.124	0
Enpp2	0	0.835724	0.741	0.22	0
Hspg2	0	0.827953	0.847	0.494	0
Mafb	0	0.824299	0.597	0.189	0
Lgals1	0	0.81403	0.902	0.733	0
Ldha	0	0.800776	0.735	0.422	0
Sh3bgrl3	0	0.799863	0.771	0.439	0
Cd63	0	0.785061	0.927	0.761	0
Col6a1	0	0.773425	0.939	0.734	0
Tnc	0	0.773131	0.309	0.064	0
Ctsc	0	0.736347	0.497	0.094	0
Cldn15	0	0.733437	0.452	0.043	0
Col5a3	0	0.720783	0.841	0.434	0
H2-Q7	0	0.703738	0.507	0.108	0
Ccnd2	0	0.693838	0.699	0.313	0
Serpinh1	0	0.69382	0.951	0.818	0
Lypd1	0	0.68708	0.35	0.053	0
Adam23	0	0.662821	0.54	0.106	0
Fscn1	0	0.661221	0.64	0.184	0
Cp	0	0.660385	0.755	0.324	0
Nid2	0	0.65523	0.52	0.116	0
Plod1	0	0.644787	0.661	0.215	0
Col6a2	0	0.625619	0.914	0.667	0
Col18a1	0	0.623649	0.57	0.177	0
Cyp1b1	0	0.606	0.71	0.264	0
Mme	0	0.605349	0.505	0.098	0
Fbln7	0	0.596837	0.548	0.181	0
Hmox1	0	0.589407	0.456	0.134	0
Spry1	0	0.579266	0.531	0.146	0
Lifr	0	0.565353	0.516	0.157	0
Fgf10	0	0.543541	0.443	0.106	0
Ndufa4l2	0	0.54103	0.576	0.199	0
Gpm6b	0	0.537687	0.671	0.305	0
H2-Q10	0	0.526741	0.331	0.043	0
Pparg	0	0.517738	0.435	0.076	0
Plpp1	0	0.507084	0.589	0.215	0
Eva1b	0	0.501434	0.719	0.343	0
2022-09-11	0	0.498498	0.679	0.274	0
Frmd4a	0	0.492018	0.43	0.103	0
Emilin1	0	0.481192	0.561	0.203	0
Sdc1	0	0.478304	0.385	0.082	0
Nr1h3	0	0.477193	0.468	0.107	0
Adam12	0	0.473023	0.397	0.079	0
Traf4	0	0.467242	0.389	0.069	0
Prkar2b	0	0.462449	0.355	0.051	0
Slc9a3r2	0	0.456426	0.466	0.116	0
Enpep	0	0.442318	0.465	0.124	0
Adgre5	0	0.441455	0.401	0.067	0
Aoc3	0	0.437265	0.497	0.149	0
Trabd2b	0	0.43571	0.368	0.077	0
2022-09-04	0	0.423578	0.373	0.069	0
Mdk	0	0.423415	0.453	0.138	0
Slc1a3	0	0.418465	0.371	0.086	0
2022-09-09	0	0.391626	0.38	0.08	0
Col27a1	0	0.388765	0.35	0.076	0
Limd2	0	0.383026	0.371	0.08	0
Tusc5	0	0.378684	0.267	0.031	0
Rgs10	0	0.352878	0.494	0.16	0
Spaar	0	0.351997	0.264	0.03	0
Olfm2	0	0.343799	0.204	0.018	0
Gsto1	0	0.313135	0.372	0.093	0
Serpine1	9.0843e-307	0.69843	0.537	0.21	1.6964e-302
Fam43a	8.36995e-296	0.354285	0.316	0.069	1.56301e-291
Retsat	5.73613e-290	0.353155	0.323	0.074	1.07116e-285
Acot7	3.57122e-288	0.320234	0.364	0.096	6.66889e-284
Pdgfrb	7.1808e-285	0.448544	0.63	0.268	1.34094e-280
Snrk	9.87969e-285	0.484493	0.519	0.192	1.84493e-280
G0s2	5.18969e-284	0.787239	0.531	0.224	9.69123e-280
S100a1	1.22632e-281	0.506459	0.613	0.287	2.29002e-277
Serf2	2.50686e-281	0.617378	0.928	0.815	4.68132e-277
Ass1	2.72089e-278	0.549131	0.289	0.062	5.08099e-274
Crip2	5.17963e-277	0.485168	0.741	0.407	9.67244e-273
Steap4	2.65016e-275	0.415405	0.655	0.291	4.94892e-271
Ptgir	3.3367e-272	0.329186	0.27	0.053	6.23096e-268
C1qtnf12	1.79274e-271	0.31053	0.47	0.16	3.34776e-267
Arc	4.32465e-265	0.329249	0.204	0.026	8.07586e-261
Angptl2	7.02101e-264	0.505295	0.747	0.415	1.3111e-259
Ldhb	1.03505e-263	0.332926	0.373	0.108	1.93285e-259
Cxcl16	5.88149e-263	0.34283	0.507	0.188	1.09831e-258
Adamts4	6.96092e-262	0.3818	0.306	0.073	1.29988e-257
Notch3	8.86857e-260	0.259771	0.249	0.046	1.65612e-255
Snhg18	4.25089e-258	0.465871	0.71	0.388	7.93811e-254
Cd81	4.74517e-258	0.492745	0.904	0.762	8.86113e-254
Anxa5	3.50736e-257	0.574215	0.868	0.67	6.54964e-253
Jup	2.96483e-255	0.335231	0.329	0.087	5.53653e-251
Ephx2	4.46721e-255	0.268072	0.23	0.038	8.34206e-251
Hrct1	7.27205e-255	0.28745	0.299	0.071	1.35798e-250
Rasl12	1.33123e-254	0.251745	0.208	0.03	2.48594e-250
Notch1	1.51033e-254	0.294888	0.243	0.045	2.8204e-250
Cstb	1.94941e-251	0.667139	0.72	0.453	3.64033e-247
Pappa	4.22601e-251	0.364518	0.203	0.029	7.89165e-247
Rhoj	3.83034e-249	0.475155	0.828	0.53	7.15277e-245
Jade1	5.51443e-249	0.363208	0.444	0.154	1.02976e-244
Lgmn	4.9078e-248	0.492524	0.586	0.268	9.16483e-244
St6galnac2	1.25588e-246	0.268487	0.216	0.035	2.34523e-242
Snai1	1.28625e-242	0.324534	0.351	0.103	2.40194e-238
Fam212a	1.34517e-241	0.237323	0.224	0.039	2.51198e-237
Mrps6	2.82428e-240	0.31458	0.386	0.123	5.27406e-236
Myo1b	4.86628e-240	0.267239	0.239	0.047	9.08728e-236
Fkbp11	4.04573e-239	0.489664	0.577	0.274	7.55499e-235
Ada	4.52765e-239	0.245551	0.225	0.04	8.45494e-235
2022-03-05	1.03121e-237	0.375555	0.58	0.256	1.92568e-233
Fxyd5	2.30611e-235	0.350104	0.587	0.265	4.30644e-231
Bcat1	3.17637e-233	0.269239	0.304	0.08	5.93155e-229
Hilpda	3.18997e-231	0.308056	0.375	0.119	5.95695e-227
Pcolce	3.79821e-231	0.508003	0.874	0.653	7.09279e-227
Lgals3bp	1.68871e-230	0.514669	0.7	0.405	3.15349e-226
Adcyap1r1	2.77288e-230	0.282358	0.297	0.077	5.17808e-226
Rnf144a	2.11439e-228	0.268249	0.304	0.081	3.94841e-224
P3h1	4.08313e-228	0.323283	0.511	0.21	7.62483e-224
Csad	7.5688e-227	0.284515	0.381	0.124	1.4134e-222
Plvap	1.1501e-226	0.250302	0.329	0.095	2.1477e-222
Fkbp10	6.42294e-223	0.415999	0.626	0.313	1.19942e-218
Egr2	1.0843e-222	0.336122	0.309	0.087	2.02482e-218
Dnajc15	5.77243e-221	0.246818	0.421	0.148	1.07794e-216
H2-Q4	1.4383e-218	0.285473	0.423	0.151	2.68587e-214
Scarb2	3.15395e-218	0.324121	0.609	0.285	5.88969e-214
Cmbl	7.29931e-217	0.299192	0.276	0.07	1.36307e-212
Idh2	1.02507e-216	0.325497	0.554	0.243	1.91421e-212
H2-Q6	1.61531e-216	0.333315	0.237	0.052	3.01643e-212
Sh3pxd2a	2.37059e-216	0.297085	0.367	0.12	4.42683e-212
Epas1	1.39262e-215	0.213969	0.242	0.053	2.60057e-211
Kdelr3	8.05624e-215	0.401259	0.716	0.404	1.50442e-210
Slfn5	7.59774e-214	0.498241	0.832	0.572	1.4188e-209
Arpc1b	2.04418e-213	0.458724	0.879	0.715	3.8173e-209
Grb14	2.49009e-213	0.273996	0.204	0.037	4.65e-209
Lamb1	1.08935e-212	0.454478	0.778	0.438	2.03426e-208
Ssr2	5.18435e-212	0.498485	0.742	0.491	9.68125e-208
Timp1	6.36777e-212	1.22233	0.44	0.209	1.18912e-207
P2ry14	1.79852e-211	0.265086	0.224	0.046	3.35856e-207
Cpxm1	2.46391e-211	0.457612	0.673	0.362	4.60111e-207
Ctsh	4.37331e-210	0.50529	0.8	0.545	8.16673e-206
Pla2g16	1.05355e-209	0.357178	0.49	0.206	1.96739e-205
Iigp1	1.14187e-209	0.684134	0.488	0.225	2.13233e-205
Apex1	8.71276e-209	0.269454	0.376	0.127	1.62702e-204
Pear1	5.59538e-208	0.236107	0.254	0.061	1.04488e-203
Plxnd1	1.33762e-207	0.246146	0.222	0.046	2.49788e-203
Pth1r	1.3752e-205	0.248183	0.313	0.093	2.56805e-201
Chchd2	5.97069e-205	0.520082	0.854	0.692	1.11497e-200
Tmem167	4.26048e-204	0.404052	0.754	0.484	7.95602e-200
Tmem119	2.41901e-203	0.325197	0.535	0.237	4.51727e-199
Ccdc71l	2.46361e-203	0.251847	0.365	0.122	4.60055e-199
Hist1h2bc	8.36203e-201	0.426629	0.512	0.237	1.56153e-196
Rem1	4.17098e-200	0.243934	0.229	0.052	7.78888e-196
Bzw2	1.74245e-199	0.241241	0.368	0.126	3.25384e-195
S1pr3	2.09373e-198	0.276914	0.288	0.083	3.90983e-194
Lrrc59	2.14062e-198	0.367262	0.563	0.273	3.99739e-194
Fah	5.74544e-198	0.218668	0.229	0.052	1.0729e-193
Thsd7a	4.22339e-197	0.311623	0.266	0.071	7.88676e-193
Svep1	1.94209e-196	0.295498	0.577	0.261	3.62665e-192
Pofut2	1.95025e-196	0.298925	0.641	0.319	3.64189e-192
Fam49a	3.05516e-196	0.27153	0.251	0.064	5.70521e-192
Cyth3	8.96339e-196	0.354328	0.577	0.272	1.67382e-191
Vasp	9.40264e-196	0.261281	0.483	0.203	1.75585e-191
Gpx7	5.21145e-195	0.455824	0.699	0.431	9.73186e-191
2022-09-06	6.3681e-194	0.239723	0.203	0.041	1.18918e-189
Serf1	2.43255e-193	0.277481	0.541	0.244	4.54254e-189
Srpx	9.27851e-193	0.414949	0.723	0.431	1.73267e-188
Tspan9	1.07636e-192	0.205787	0.229	0.053	2.01e-188
Btg1	2.14673e-192	0.392003	0.61	0.322	4.00879e-188
Angptl4	2.74089e-192	0.665197	0.631	0.396	5.11833e-188
Lrrfip1	4.6046e-192	0.229303	0.325	0.105	8.59862e-188
Ifi27	7.78543e-192	0.463595	0.765	0.523	1.45385e-187
Ryk	1.28401e-191	0.302206	0.682	0.35	2.39776e-187
Cmpk1	3.62002e-191	0.276191	0.607	0.295	6.76002e-187
Fam162a	7.2501e-191	0.363469	0.655	0.357	1.35388e-186
2810004N23Rik	6.64308e-190	0.235732	0.381	0.137	1.24053e-185
Ppdpf	1.02883e-189	0.299628	0.588	0.288	1.92124e-185
Rrbp1	2.79814e-189	0.405212	0.919	0.779	5.22525e-185
Gpr153	3.19497e-188	0.284247	0.437	0.176	5.96629e-184
2310039H08Rik	3.40417e-188	0.243987	0.519	0.23	6.35695e-184
Eps8	7.49399e-188	0.300948	0.43	0.171	1.39943e-183
Cfl1	1.61488e-187	0.465341	0.844	0.66	3.01562e-183
Fdxr	1.1797e-186	0.241115	0.241	0.062	2.20298e-182
Lmo4	7.5834e-185	0.298452	0.61	0.301	1.41612e-180
Pgm2	4.3343e-182	0.215384	0.347	0.119	8.09388e-178
1110008F13Rik	1.31891e-181	0.336202	0.664	0.374	2.46293e-177
Tmsb10	3.00202e-181	0.531471	0.9	0.811	5.60597e-177
Map2k3	2.3903e-180	0.258291	0.456	0.189	4.46364e-176
Poldip2	3.4218e-180	0.230696	0.436	0.176	6.38987e-176
Ccl2	4.26951e-180	1.32955	0.33	0.128	7.97288e-176
Cald1	4.71798e-180	0.515758	0.876	0.725	8.81036e-176
Itpripl2	7.48448e-180	0.265169	0.507	0.224	1.39765e-175
Cox8a	7.50405e-180	0.473951	0.857	0.654	1.40131e-175
Csgalnact1	8.96682e-180	0.25197	0.204	0.046	1.67446e-175
Slc25a5	9.68558e-180	0.651519	0.602	0.368	1.80868e-175
Lum	1.86872e-179	0.528679	0.866	0.701	3.48965e-175
Swi5	1.12271e-178	0.394293	0.837	0.635	2.09655e-174
Pfkl	2.33686e-178	0.217912	0.257	0.072	4.36385e-174
Vamp5	4.20712e-178	0.220517	0.308	0.1	7.85638e-174
Psat1	1.57819e-177	0.21949	0.238	0.063	2.94712e-173
Gpx4	8.73338e-177	0.412761	0.859	0.681	1.63087e-172
Sec61g	1.23815e-176	0.51005	0.762	0.557	2.31212e-172
Ntf3	2.46491e-176	0.325614	0.264	0.078	4.60297e-172
Rnf149	2.95261e-176	0.201814	0.316	0.104	5.5137e-172
Sox9	5.95248e-175	0.27016	0.231	0.06	1.11157e-170
Mrpl38	6.30706e-175	0.215628	0.357	0.129	1.17778e-170
Ost4	6.44524e-175	0.478794	0.757	0.551	1.20358e-170
Ap3s1	8.03088e-175	0.345853	0.685	0.398	1.49969e-170
Pck2	1.4829e-174	0.23546	0.368	0.136	2.76917e-170
Ppia	2.47656e-173	0.418874	0.903	0.785	4.62472e-169
Rplp0	1.25709e-172	0.462625	0.937	0.875	2.34748e-168
Tmem97	3.46609e-172	0.218204	0.326	0.112	6.47257e-168
Mgst1	3.82556e-172	0.373887	0.889	0.715	7.14386e-168
Layn	1.97307e-171	0.215879	0.285	0.09	3.68451e-167
Agpat2	3.56567e-171	0.210533	0.302	0.099	6.65854e-167
Eif1ax	4.68853e-171	0.279474	0.589	0.293	8.75536e-167
Mospd1	1.26197e-170	0.200619	0.3	0.097	2.3566e-166
Tceal9	8.38018e-170	0.41422	0.773	0.536	1.56491e-165
Tmed9	2.68467e-169	0.375154	0.83	0.622	5.01336e-165
Mmp19	3.24602e-169	0.268522	0.437	0.184	6.06162e-165
Uqcrq	9.63232e-169	0.499463	0.664	0.423	1.79874e-164
Sc5d	2.37805e-168	0.28663	0.276	0.087	4.44078e-164
Mrpl17	2.71e-168	0.28885	0.601	0.317	5.06066e-164
Cxcl10	1.17126e-167	1.07106	0.258	0.082	2.18722e-163
Sod2	1.24404e-167	0.641899	0.521	0.283	2.32312e-163
Ms4a4d	1.77433e-167	0.283603	0.686	0.376	3.31338e-163
C1qtnf6	3.76282e-167	0.252728	0.581	0.286	7.0267e-163
Adamts12	8.93303e-167	0.330005	0.51	0.238	1.66815e-162
1110065P20Rik	9.36618e-167	0.212242	0.48	0.211	1.74904e-162
Eif4ebp1	1.13153e-166	0.37293	0.648	0.381	2.11302e-162
Eif4g3	1.41903e-165	0.338641	0.579	0.289	2.6499e-161
Cox14	1.44402e-165	0.354861	0.672	0.399	2.69656e-161
Hikeshi	1.59856e-165	0.21488	0.562	0.268	2.98515e-161
Sparc	1.8876e-165	0.292982	0.935	0.819	3.5249e-161
Naa50	9.08291e-165	0.266045	0.592	0.298	1.69614e-160
Nme1	1.0494e-164	0.466866	0.619	0.381	1.95966e-160
Snhg6	1.31763e-164	0.260848	0.432	0.184	2.46055e-160
Erp29	2.51631e-164	0.365135	0.755	0.507	4.69896e-160
Cotl1	2.73141e-164	0.304481	0.507	0.239	5.10063e-160
Adam19	5.22485e-164	0.274758	0.353	0.133	9.75689e-160
Tfpi	8.93206e-164	0.217855	0.478	0.211	1.66797e-159
Arhgap24	1.00895e-163	0.259789	0.327	0.116	1.88411e-159
Tril	3.76777e-163	0.250489	0.334	0.122	7.03594e-159
Cdc42ep5	4.28012e-163	0.209254	0.462	0.199	7.99269e-159
Cebpa	5.60024e-162	0.257805	0.285	0.094	1.04579e-157
Smad3	6.31348e-162	0.2193	0.264	0.082	1.17898e-157
H2-T22	8.53865e-162	0.384211	0.634	0.361	1.59451e-157
Srm	1.11474e-161	0.380107	0.592	0.331	2.08167e-157
Galk1	4.71165e-161	0.204998	0.451	0.195	8.79853e-157
Eif5a	6.75024e-161	0.532125	0.783	0.597	1.26054e-156
Atp9a	1.09907e-160	0.226745	0.401	0.164	2.0524e-156
Serp1	1.19459e-160	0.366068	0.656	0.395	2.23077e-156
Vwa1	1.57952e-160	0.267505	0.258	0.08	2.9496e-156
Ndufa4	3.1526e-160	0.436225	0.796	0.606	5.88717e-156
Psmb9	4.27578e-160	0.217879	0.448	0.193	7.98459e-156
Atp5g1	5.31538e-160	0.389328	0.768	0.547	9.92594e-156
H2afj	1.9751e-159	0.325645	0.603	0.334	3.6883e-155
Mast4	3.64522e-159	0.232403	0.458	0.2	6.80708e-155
Rarres2	4.09715e-159	0.521867	0.88	0.807	7.65102e-155
Gnb4	3.3928e-158	0.222454	0.449	0.195	6.33571e-154
Gapdh	5.71167e-158	0.405266	0.593	0.348	1.0666e-153
Ccl11	7.03221e-158	0.510527	0.862	0.735	1.31319e-153
Mydgf	1.73862e-157	0.318583	0.702	0.443	3.2467e-153
P3h4	6.33426e-157	0.246846	0.544	0.266	1.18286e-152
Rhob	2.12263e-155	0.395701	0.626	0.369	3.9638e-151
Psmb2	2.20062e-155	0.369758	0.727	0.485	4.10943e-151
Nmb	5.05905e-155	0.373126	0.243	0.074	9.44728e-151
Pgk1	8.31289e-155	0.338777	0.558	0.294	1.55235e-150
Dpep1	2.28919e-154	0.542101	0.834	0.69	4.27483e-150
Spcs1	3.61014e-154	0.336814	0.768	0.552	6.74158e-150
Ggt5	5.68703e-154	0.251826	0.345	0.132	1.062e-149
Gng11	8.13613e-154	0.290871	0.621	0.355	1.51934e-149
Casp4	2.10729e-153	0.246601	0.426	0.183	3.93516e-149
Ddit4	3.386e-153	0.279986	0.255	0.08	6.32301e-149
Isg15	6.61885e-153	0.668376	0.475	0.247	1.236e-148
Tpm4	3.58847e-151	0.431544	0.761	0.55	6.7011e-147
Tmem208	6.49615e-151	0.217109	0.573	0.288	1.21309e-146
Mrc2	6.78826e-151	0.254136	0.615	0.32	1.26764e-146
Cd36	2.23192e-150	0.330899	0.271	0.094	4.16789e-146
Rab13	8.50489e-150	0.219258	0.466	0.212	1.5882e-145
Nrep	1.59376e-149	0.33671	0.325	0.126	2.97619e-145
Osmr	4.36515e-148	0.235622	0.447	0.2	8.15147e-144
Fads1	7.59576e-148	0.243376	0.338	0.131	1.41843e-143
Eno1	2.42599e-146	0.302902	0.46	0.217	4.5303e-142
Sned1	6.71658e-146	0.272117	0.458	0.213	1.25425e-141
Rpl29	3.07902e-145	0.416989	0.843	0.698	5.74976e-141
Lbh	5.70839e-145	0.243756	0.249	0.08	1.06599e-140
Txn2	5.85805e-145	0.300022	0.621	0.357	1.09393e-140
Rexo2	6.45937e-145	0.341201	0.741	0.516	1.20622e-140
P2rx4	7.32823e-145	0.229098	0.493	0.235	1.36847e-140
Lman1	1.11583e-144	0.323852	0.734	0.466	2.0837e-140
Eif1a	1.17854e-144	0.226884	0.552	0.277	2.20081e-140
Tomm40	1.26123e-144	0.20397	0.434	0.194	2.35522e-140
Asns	2.0094e-144	0.213295	0.266	0.09	3.75236e-140
Banf1	3.61663e-144	0.218728	0.578	0.296	6.7537e-140
Palld	4.55416e-144	0.26552	0.465	0.219	8.50443e-140
Spred1	6.37788e-144	0.244901	0.498	0.24	1.19101e-139
Por	2.79415e-142	0.219184	0.579	0.298	5.21779e-138
Stat1	4.43195e-142	0.266513	0.415	0.185	8.27622e-138
Il1r1	5.54717e-142	0.263612	0.558	0.286	1.03588e-137
Sec22b	1.18864e-141	0.255704	0.632	0.35	2.21966e-137
Npc2	2.31008e-141	0.438971	0.856	0.707	4.31385e-137
Pabpc4	3.01647e-141	0.20859	0.36	0.146	5.63296e-137
Mcrip2	3.116e-141	0.241186	0.23	0.071	5.81883e-137
Idh1	4.1949e-141	0.232483	0.593	0.313	7.83356e-137
Colec12	8.9509e-141	0.285371	0.472	0.225	1.67149e-136
Lamtor1	1.24198e-140	0.22496	0.631	0.342	2.31927e-136
Grpel1	2.8475e-140	0.201696	0.556	0.28	5.31743e-136
Marcksl1	6.37711e-138	0.20255	0.244	0.08	1.19086e-133
Pdap1	8.67143e-138	0.271525	0.67	0.396	1.6193e-133
Dnajb1	1.11005e-137	0.550413	0.485	0.277	2.0729e-133
Gm4951	1.28395e-137	0.249866	0.283	0.103	2.39765e-133
Hacd1	1.45025e-136	0.204011	0.431	0.196	2.7082e-132
Tmed2	1.56764e-136	0.32291	0.834	0.654	2.92742e-132
H13	3.55396e-136	0.248668	0.658	0.385	6.63667e-132
Lrrc8a	1.20264e-135	0.225327	0.323	0.129	2.24582e-131
Pten	2.16997e-135	0.245609	0.613	0.33	4.0522e-131
Il17d	2.68259e-135	0.247919	0.285	0.106	5.00947e-131
H2-M3	3.17535e-135	0.202055	0.385	0.166	5.92965e-131
Fam104a	1.98869e-134	0.209778	0.625	0.34	3.71369e-130
Ndufs5	3.08512e-134	0.311158	0.717	0.483	5.76115e-130
Edf1	4.75994e-134	0.344525	0.769	0.552	8.88871e-130
Akr1b3	5.24742e-134	0.316785	0.651	0.397	9.79903e-130
Cd151	9.01872e-133	0.235955	0.593	0.324	1.68416e-128
Map4k4	2.08091e-132	0.276776	0.631	0.351	3.88589e-128
Hspe1	8.65745e-132	0.542018	0.694	0.499	1.61669e-127
Uhrf2	3.41198e-131	0.312276	0.482	0.241	6.37154e-127
Rpl41	1.11933e-130	0.523009	0.874	0.806	2.09024e-126
Ifitm2	2.60786e-130	0.29521	0.919	0.83	4.86992e-126
Cdc26	1.46076e-129	0.219405	0.622	0.345	2.72782e-125
Svbp	3.356e-129	0.252153	0.657	0.394	6.26699e-125
Mrps16	1.19349e-128	0.205591	0.6	0.33	2.22873e-124
Nnmt	1.29116e-128	0.259575	0.579	0.32	2.4111e-124
Scand1	1.32601e-128	0.239022	0.715	0.439	2.47619e-124
Pfn1	1.61307e-128	0.375618	0.81	0.647	3.01225e-124
Gm12216	2.03472e-128	0.321386	0.458	0.227	3.79964e-124
Psma4	5.21192e-128	0.30701	0.722	0.491	9.73275e-124
Scd1	1.54097e-127	0.305837	0.505	0.262	2.87762e-123
Prdx1	5.41366e-127	0.353805	0.832	0.673	1.01095e-122
Hadh	5.43835e-127	0.222486	0.486	0.239	1.01556e-122
Rpl13a	2.07143e-126	0.408217	0.721	0.543	3.86819e-122
Cnpy2	3.86352e-126	0.285832	0.796	0.585	7.21473e-122
Sec13	6.72005e-126	0.226362	0.597	0.339	1.2549e-121
Ak2	4.36142e-124	0.21292	0.449	0.213	8.14451e-120
Mt1	7.72972e-123	0.792115	0.654	0.487	1.44345e-118
Ube2i	1.00397e-122	0.232592	0.675	0.405	1.87481e-118
Creg1	1.62216e-122	0.265284	0.703	0.441	3.02922e-118
Idh3a	1.62548e-122	0.253603	0.369	0.163	3.03542e-118
Nhp2	1.75104e-122	0.252042	0.519	0.277	3.26989e-118
Sec61b	2.67196e-122	0.42629	0.767	0.601	4.98962e-118
Ghitm	3.51379e-122	0.223952	0.607	0.34	6.56165e-118
Ddit3	3.69292e-122	0.229788	0.407	0.188	6.89617e-118
Cthrc1	4.93368e-122	0.291547	0.296	0.121	9.21315e-118
Ly6e	1.98291e-121	0.471979	0.718	0.528	3.70288e-117
Scn1b	3.22249e-121	0.210748	0.551	0.295	6.01768e-117
Tap2	7.72847e-121	0.206716	0.436	0.209	1.44321e-116
Aprt	1.00892e-120	0.247479	0.644	0.392	1.88407e-116
Gadd45a	1.80141e-120	0.207338	0.316	0.131	3.36396e-116
Col5a2	1.9751e-120	0.290189	0.873	0.683	3.6883e-116
Phf11d	2.3231e-120	0.213709	0.361	0.163	4.33816e-116
Dlc1	2.37586e-120	0.211192	0.647	0.366	4.43669e-116
Cycs	7.96611e-120	0.308498	0.471	0.246	1.48759e-115
Mndal	9.77103e-120	0.281536	0.578	0.327	1.82464e-115
Rtp4	1.29982e-119	0.220933	0.453	0.23	2.42729e-115
Rcn3	4.43853e-119	0.350469	0.837	0.67	8.28851e-115
Tnfrsf1a	1.57109e-118	0.245307	0.674	0.412	2.93385e-114
Rpl22l1	3.64718e-118	0.367653	0.882	0.784	6.81075e-114
Arpc3	9.59116e-118	0.277756	0.746	0.519	1.79105e-113
Tcf7l2	1.19072e-117	0.225995	0.455	0.227	2.22354e-113
Vkorc1	1.10984e-116	0.3328	0.735	0.552	2.07251e-112
Ppic	1.63664e-116	0.257872	0.797	0.561	3.05626e-112
Eif6	1.77244e-116	0.225696	0.592	0.346	3.30985e-112
Gng5	2.15946e-116	0.291693	0.866	0.714	4.03258e-112
Calr	3.85135e-116	0.361451	0.866	0.725	7.19201e-112
Oasl2	5.97432e-115	0.200432	0.412	0.2	1.11564e-110
Phgdh	1.769e-114	0.222254	0.296	0.124	3.30343e-110
Glrx3	3.48762e-114	0.2198	0.667	0.408	6.51279e-110
Krtcap2	3.88777e-114	0.285369	0.849	0.69	7.26002e-110
Crtap	8.95241e-114	0.217056	0.637	0.374	1.67177e-109
2010107E04Rik	1.09549e-113	0.324716	0.621	0.403	2.04572e-109
C1qbp	2.52864e-113	0.214374	0.533	0.288	4.72199e-109
Rpl31	3.04989e-113	0.37006	0.819	0.693	5.69537e-109
Hist1h1c	4.6236e-113	0.253752	0.286	0.119	8.63411e-109
B4galt5	8.72236e-113	0.209774	0.262	0.101	1.62881e-108
Ranbp1	2.67271e-112	0.290392	0.675	0.457	4.99103e-108
Atp5b	6.32697e-112	0.419433	0.765	0.585	1.1815e-107
Cxcl1	7.63331e-112	0.477801	0.587	0.386	1.42545e-107
Arl1	3.01945e-111	0.270081	0.788	0.58	5.63852e-107
Scp2	5.4249e-111	0.280362	0.714	0.478	1.01305e-106
Ppib	1.81679e-110	0.291169	0.911	0.8	3.39267e-106
Rps2	4.65152e-110	0.429666	0.871	0.797	8.68626e-106
Ssr4	6.26178e-110	0.315014	0.794	0.617	1.16933e-105
P4ha1	8.84161e-108	0.213959	0.667	0.399	1.65108e-103
Eny2	7.61526e-107	0.206133	0.629	0.384	1.42207e-102
Rgcc	9.71627e-107	0.274849	0.207	0.072	1.81442e-102
Psma3	4.49539e-106	0.279011	0.768	0.579	8.39469e-102
Tceal8	1.63137e-105	0.249113	0.662	0.428	3.04642e-101
Surf4	1.83413e-105	0.223978	0.681	0.432	3.42506e-101
Hspa9	2.97591e-105	0.26369	0.535	0.305	5.55721e-101
Sdhb	7.6487e-105	0.233065	0.635	0.397	1.42832e-100
Mxra8	2.54108e-104	0.247623	0.755	0.51	4.74521e-100
Ssr1	5.44886e-104	0.200978	0.636	0.379	1.01752e-99
Cox5a	1.09429e-102	0.399991	0.578	0.371	2.04347e-98
Ift20	2.17701e-102	0.244839	0.704	0.49	4.06534e-98
Prelid1	6.22555e-102	0.280442	0.664	0.449	1.16256e-97
Ifitm3	1.42775e-101	0.314185	0.883	0.82	2.66617e-97
Rps18	4.06899e-101	0.366759	0.907	0.839	7.59843e-97
Atp5g3	7.22196e-100	0.225725	0.675	0.437	1.34863e-95
Ndufab1	2.55364e-99	0.269851	0.653	0.432	4.76866e-95
Cyc1	2.55488e-99	0.239081	0.549	0.317	4.77098e-95
Cox6b1	2.8669e-99	0.330696	0.757	0.584	5.35365e-95
Pdia4	1.4212e-98	0.214799	0.614	0.363	2.65395e-94
Mmp14	1.94262e-98	0.248752	0.819	0.597	3.62766e-94
Ech1	1.21312e-96	0.258463	0.691	0.482	2.26538e-92
Mrpl52	2.61612e-96	0.230183	0.666	0.456	4.88535e-92
Rhoc	5.59121e-96	0.294754	0.735	0.549	1.0441e-91
Fap	7.82614e-96	0.20613	0.47	0.255	1.46145e-91
Cdc42	1.24965e-95	0.263006	0.844	0.678	2.33359e-91
Ckap4	1.75461e-94	0.269599	0.694	0.471	3.27656e-90
Ftl1	1.81394e-94	0.35341	0.942	0.92	3.38735e-90
Maged1	3.07892e-94	0.228212	0.704	0.482	5.74957e-90
Psmb8	3.45685e-93	0.225782	0.63	0.406	6.45533e-89
Snx3	7.55981e-93	0.215448	0.714	0.492	1.41172e-88
Fst	4.6866e-92	0.509046	0.645	0.438	8.75176e-88
P4hb	1.98491e-91	0.285228	0.789	0.609	3.70662e-87
Ifi203	2.29318e-91	0.290793	0.579	0.36	4.28228e-87
Cdk4	5.57652e-91	0.211812	0.621	0.393	1.04136e-86
Rtraf	1.11701e-90	0.23763	0.756	0.564	2.08591e-86
Psma5	1.26177e-90	0.205908	0.653	0.429	2.35623e-86
Rpl39	2.49455e-90	0.324518	0.892	0.823	4.65833e-86
Atp5e	2.21854e-89	0.265032	0.79	0.623	4.1429e-85
Pebp1	2.12234e-88	0.237963	0.794	0.621	3.96326e-84
Ppp1ca	8.04965e-88	0.2291	0.742	0.544	1.50319e-83
Kdelr2	8.75976e-88	0.373363	0.645	0.454	1.6358e-83
Atpif1	9.98518e-88	0.245432	0.723	0.53	1.86463e-83
Npm1	1.05392e-87	0.374792	0.819	0.695	1.96809e-83
Hspd1	5.93187e-87	0.418273	0.593	0.398	1.10772e-82
Etfb	1.05759e-86	0.302678	0.642	0.457	1.97495e-82
Mdh2	2.20253e-86	0.259552	0.652	0.448	4.11301e-82
Cox7c	6.85449e-86	0.314009	0.755	0.582	1.28001e-81
Psmd7	3.7056e-85	0.205291	0.688	0.47	6.91984e-81
Atp5j	5.18112e-85	0.225629	0.819	0.657	9.67523e-81
Tomm20	2.22509e-84	0.251934	0.647	0.442	4.15514e-80
Tmem258	2.49605e-84	0.246375	0.627	0.444	4.66112e-80
Arf5	4.98248e-84	0.230724	0.851	0.703	9.30428e-80
Tmbim6	1.1689e-83	0.23798	0.777	0.606	2.18281e-79
Tcf4	1.91277e-83	0.224982	0.791	0.571	3.5719e-79
Arf4	3.68795e-83	0.240621	0.851	0.703	6.88687e-79
Atp5g2	4.11279e-83	0.235439	0.719	0.528	7.68023e-79
Rpl32	5.38276e-82	0.30504	0.942	0.895	1.00518e-77
Irf7	6.19378e-82	0.319181	0.367	0.201	1.15663e-77
Rps17	6.82846e-82	0.300112	0.889	0.818	1.27515e-77
Usmg5	2.46245e-81	0.207575	0.529	0.339	4.59839e-77
Psma7	6.40804e-81	0.235813	0.759	0.581	1.19664e-76
Serbp1	8.67036e-81	0.247612	0.722	0.527	1.6191e-76
Timm13	1.96132e-80	0.236845	0.675	0.486	3.66256e-76
Dad1	3.40028e-80	0.23553	0.797	0.634	6.34969e-76
Mt2	3.41385e-80	0.684352	0.496	0.348	6.37502e-76
Ndufc1	4.46228e-80	0.219774	0.608	0.412	8.33285e-76
Selenow	7.9561e-80	0.226205	0.913	0.825	1.48572e-75
Dbi	1.27066e-79	0.426239	0.674	0.503	2.37284e-75
Rpl15	4.29902e-79	0.281496	0.905	0.839	8.02798e-75
Cox6c	7.76068e-79	0.258812	0.781	0.625	1.44923e-74
Ccl7	8.88158e-79	0.914838	0.368	0.23	1.65855e-74
Cox6a1	1.75471e-78	0.229578	0.745	0.576	3.27674e-74
Snrpf	5.98364e-77	0.217747	0.607	0.415	1.11738e-72
Uqcr11	3.36633e-76	0.273756	0.62	0.432	6.28629e-72
Capns1	8.25835e-76	0.221566	0.827	0.668	1.54216e-71
Rps27l	1.83547e-75	0.289164	0.74	0.579	3.42756e-71
Manf	3.50776e-74	0.321867	0.642	0.475	6.55039e-70
Oaf	1.37462e-73	0.243667	0.778	0.59	2.56696e-69
Bst2	1.55472e-73	0.437306	0.622	0.468	2.90329e-69
Abca8a	5.45652e-73	0.280056	0.715	0.492	1.01895e-68
Eif4a1	6.46119e-73	0.29289	0.748	0.586	1.20656e-68
Selenof	8.8834e-73	0.208878	0.878	0.748	1.65889e-68
Tma7	3.10544e-71	0.227873	0.704	0.532	5.7991e-67
Anp32b	1.82529e-70	0.216123	0.678	0.494	3.40854e-66
Uqcr10	6.77898e-70	0.228637	0.644	0.453	1.26591e-65
Atp5j2	1.30392e-69	0.231349	0.737	0.559	2.43494e-65
Eef1g	1.35948e-69	0.291565	0.828	0.733	2.53869e-65
Elob	2.34974e-69	0.203528	0.821	0.679	4.3879e-65
Ran	5.95967e-69	0.281609	0.645	0.472	1.11291e-64
Tmed3	1.53633e-68	0.226061	0.833	0.706	2.86894e-64
Pdia6	1.71297e-68	0.277821	0.778	0.635	3.19879e-64
Pgam1	3.26565e-68	0.211337	0.624	0.423	6.09827e-64
Rplp2	3.57319e-68	0.252341	0.847	0.759	6.67257e-64
Plxdc2	1.01633e-67	0.304351	0.774	0.573	1.89789e-63
Rpl6	6.52371e-67	0.236936	0.926	0.863	1.21824e-62
Grn	1.05743e-64	0.207793	0.749	0.563	1.97465e-60
Ifit3	2.61532e-63	0.499537	0.269	0.145	4.88386e-59
Hspa5	7.3343e-63	0.313885	0.832	0.712	1.36961e-58
Rpl23a	1.00943e-62	0.237831	0.916	0.868	1.88501e-58
Atp5f1	2.34661e-62	0.21382	0.752	0.581	4.38206e-58
Cebpb	2.4916e-62	0.297706	0.632	0.474	4.6528e-58
Btf3	1.74806e-61	0.206973	0.842	0.726	3.26433e-57
Atp5l	3.0184e-61	0.206498	0.802	0.656	5.63657e-57
Pnrc1	2.41139e-60	0.202981	0.7	0.526	4.50303e-56
Cox7a2	1.00398e-59	0.20309	0.697	0.517	1.87484e-55
Rpl11	3.02781e-58	0.210073	0.896	0.825	5.65413e-54
Rpl36	4.51063e-57	0.209658	0.89	0.794	8.42316e-53
Rpl10a	2.36597e-56	0.250688	0.898	0.829	4.41821e-52
Rpl24	4.09435e-56	0.214386	0.926	0.871	7.64579e-52
Rps6	5.22184e-56	0.234538	0.935	0.898	9.75126e-52
Tpi1	2.93589e-55	0.230786	0.586	0.417	5.48248e-51
Rpl37	2.63709e-54	0.201315	0.899	0.838	4.9245e-50
Myl12a	1.66136e-52	0.200645	0.789	0.673	3.10242e-48
Itih5	3.46817e-51	0.258686	0.785	0.569	6.47646e-47
Hsp90aa1	2.54433e-50	0.244046	0.806	0.683	4.75128e-46
Atp5o.1	5.14973e-49	0.212602	0.65	0.487	9.61661e-45
Rplp1	1.70739e-48	0.233184	0.892	0.827	3.18838e-44
Rps15a	1.45231e-46	0.201265	0.937	0.898	2.71205e-42
Phlda1	1.08524e-45	0.31202	0.59	0.462	2.02658e-41
Hspb1	2.79533e-45	0.296197	0.35	0.23	5.22e-41
Lama2	2.83826e-43	0.253923	0.656	0.474	5.30018e-39
Pkm	1.40201e-42	0.222558	0.602	0.464	2.61812e-38
Ifit1	5.32818e-35	0.236164	0.273	0.172	9.94984e-31
Gm26917	5.15491e-31	0.526961	0.38	0.246	9.62628e-27
Ubc	6.38812e-29	0.36486	0.675	0.615	1.19292e-24
Hspa1a	3.47083e-24	0.230849	0.282	0.202	6.48143e-20
Hspa8	2.14357e-17	0.205293	0.75	0.69	4.0029e-13
Txnip	4.3523e-05	0.326627	0.618	0.611	0.812749
Actb	0.037179	0.326093	0.47	0.535	1

## Sheet: ASC2
	p_val	avg_logFC	pct.1	pct.2	p_val_adj
Fn1	0	2.45474	0.947	0.349	0
Pi16	0	2.2358	0.87	0.235	0
Smpd3	0	1.99531	0.625	0.065	0
Anxa3	0	1.96107	0.896	0.264	0
Igfbp5	0	1.89755	0.809	0.327	0
Sema3c	0	1.88347	0.834	0.176	0
Sbsn	0	1.87553	0.53	0.118	0
Cd55	0	1.75469	0.783	0.206	0
Daglb	0	1.72631	0.529	0.104	0
Pla1a	0	1.62308	0.769	0.263	0
Plpp3	0	1.60377	0.961	0.714	0
Creb5	0	1.59838	0.774	0.215	0
Ackr3	0	1.59786	0.802	0.228	0
Dpp4	0	1.50735	0.707	0.114	0
Mrgprg	0	1.49424	0.315	0.01	0
Col6a5	0	1.48924	0.25	0.018	0
Dmkn	0	1.44048	0.23	0.025	0
Fbn1	0	1.43508	0.907	0.631	0
Pcsk6	0	1.43042	0.733	0.206	0
Fndc1	0	1.34358	0.832	0.333	0
Ugdh	0	1.33056	0.784	0.43	0
Car8	0	1.31976	0.532	0.041	0
Ly6c1	0	1.31949	0.828	0.336	0
Cd248	0	1.30714	0.848	0.436	0
Tgfbr2	0	1.28571	0.83	0.485	0
Gas7	0	1.28407	0.617	0.205	0
Gan	0	1.27181	0.406	0.104	0
Marcks	0	1.24486	0.939	0.724	0
Aldh1a3	0	1.23874	0.425	0.022	0
Efhd1	0	1.22476	0.506	0.044	0
Aif1l	0	1.20717	0.468	0.044	0
Procr	0	1.2065	0.623	0.252	0
Efemp1	0	1.19227	0.804	0.381	0
Gfpt2	0	1.18477	0.678	0.317	0
Emilin2	0	1.15212	0.719	0.321	0
Igfbp6	0	1.14582	0.966	0.582	0
Ptx3	0	1.14145	0.432	0.157	0
C3	0	1.1303	0.9	0.581	0
Akr1c18	0	1.1216	0.286	0.012	0
Opcml	0	1.10829	0.52	0.092	0
Basp1	0	1.08992	0.689	0.375	0
Anxa1	0	1.07202	0.919	0.615	0
Adamts5	0	1.06214	0.861	0.562	0
Ifi27l2a	0	1.04285	0.778	0.403	0
Col14a1	0	1.03141	0.904	0.463	0
Metrnl	0	1.0205	0.671	0.416	0
Axl	0	1.01762	0.831	0.585	0
Adgrd1	0	1.01242	0.528	0.142	0
Tmem100	0	1.00859	0.627	0.224	0
Pcolce2	0	1.00355	0.893	0.454	0
Lrrn4cl	0	1.00215	0.587	0.206	0
Cd34	0	0.994508	0.94	0.647	0
Nov	0	0.986744	0.325	0.04	0
Mustn1	0	0.964499	0.386	0.076	0
Timp2	0	0.955413	0.973	0.857	0
Limch1	0	0.941639	0.356	0.022	0
Ppp1r14b	0	0.932863	0.761	0.503	0
Dpt	0	0.924554	0.972	0.793	0
Tmsb4x	0	0.907104	0.87	0.51	0
Fstl1	0	0.897532	0.954	0.826	0
Arl4d	0	0.897316	0.362	0.039	0
Mgll	0	0.892148	0.496	0.147	0
Pde8a	0	0.891705	0.45	0.134	0
Maf	0	0.888409	0.46	0.145	0
Mfap5	0	0.874589	0.942	0.675	0
Man1a	0	0.84916	0.733	0.437	0
Cadm3	0	0.843325	0.471	0.137	0
Ly6a	0	0.838569	0.959	0.646	0
Trio	0	0.837443	0.48	0.212	0
Zyx	0	0.827554	0.575	0.323	0
Cmah	0	0.824428	0.346	0.065	0
Prss23	0	0.82393	0.739	0.521	0
Heg1	0	0.821855	0.671	0.442	0
Plat	0	0.799396	0.619	0.373	0
1700019D03Rik	0	0.79664	0.379	0.071	0
Scara3	0	0.793778	0.601	0.326	0
Clec3b	0	0.793652	0.981	0.733	0
Lsp1	0	0.77215	0.626	0.375	0
Nhsl1	0	0.771476	0.333	0.065	0
Sfrp2	0	0.770035	0.481	0.145	0
Scara5	0	0.769121	0.734	0.43	0
Ptgis	0	0.760285	0.425	0.134	0
Tek	0	0.759708	0.363	0.112	0
Lurap1l	0	0.759522	0.335	0.064	0
Islr2	0	0.758653	0.28	0.022	0
Jpt1	0	0.747213	0.751	0.538	0
Dact2	0	0.746126	0.233	0.024	0
Galnt16	0	0.723847	0.348	0.08	0
Islr	0	0.712071	0.731	0.507	0
Nid1	0	0.684982	0.921	0.777	0
Wnt2	0	0.67804	0.28	0.051	0
Arhgef28	0	0.675516	0.271	0.039	0
Fez1	0	0.675168	0.316	0.075	0
Sytl2	0	0.672391	0.249	0.022	0
Clip4	0	0.671004	0.308	0.071	0
Uchl1	0	0.65954	0.261	0.044	0
Duoxa1	0	0.657629	0.235	0.013	0
Klf4	0	0.634802	0.858	0.573	0
Serpinb6a	0	0.626942	0.891	0.754	0
Ston2	0	0.617226	0.238	0.03	0
Ogn	0	0.581905	0.866	0.647	0
Duox1	0	0.575452	0.203	0.009	0
Ace	3.00591e-304	0.740323	0.521	0.24	5.61324e-300
Ltbp1	1.59791e-303	0.749127	0.476	0.213	2.98393e-299
Nova1	6.27532e-298	0.761543	0.395	0.139	1.17185e-293
Flrt2	9.87041e-296	0.768584	0.474	0.205	1.8432e-291
Pamr1	6.99138e-294	0.68704	0.397	0.133	1.30557e-289
Fyn	3.20209e-293	0.756287	0.558	0.313	5.97958e-289
Itga11	1.68612e-288	0.6737	0.336	0.097	3.14866e-284
Gda	3.45943e-278	0.660893	0.368	0.123	6.46013e-274
Ebf1	6.60368e-278	0.600412	0.857	0.752	1.23317e-273
Prrx1	1.55212e-277	0.641573	0.785	0.66	2.89843e-273
Il13ra1	1.35868e-269	0.730483	0.341	0.117	2.5372e-265
Myof	6.18996e-269	0.710793	0.393	0.154	1.15591e-264
Tppp3	5.52935e-267	0.608898	0.717	0.435	1.03255e-262
Tnxb	9.81462e-266	0.600823	0.79	0.615	1.83278e-261
Ablim1	1.12867e-265	0.613341	0.657	0.395	2.10768e-261
Ahnak	8.27186e-264	0.493232	0.907	0.772	1.54469e-259
Fgfr1	2.32401e-263	0.668372	0.727	0.587	4.33986e-259
S100a16	2.61482e-261	0.661324	0.793	0.654	4.88292e-257
Rpl5	2.46608e-247	0.500145	0.901	0.799	4.60516e-243
Rpl30	2.81407e-245	0.445404	0.941	0.846	5.255e-241
Antxr1	2.57799e-244	0.647387	0.622	0.409	4.81414e-240
S100a10	4.72897e-243	0.579193	0.906	0.77	8.83089e-239
Zfp385a	2.0234e-239	0.715514	0.4	0.175	3.77849e-235
Tnfaip6	6.44135e-239	0.933323	0.624	0.41	1.20286e-234
Rbpj	1.33084e-233	0.712435	0.501	0.287	2.48522e-229
Qpct	3.35566e-229	0.665449	0.538	0.314	6.26635e-225
Ddr2	6.21327e-228	0.636643	0.741	0.634	1.16027e-223
Glce	9.58332e-223	0.630941	0.285	0.089	1.78959e-218
Postn	1.90625e-219	1.54578	0.587	0.374	3.55973e-215
Ildr2	1.27629e-215	0.578926	0.279	0.082	2.38334e-211
Ext1	1.7329e-213	0.759701	0.462	0.268	3.23603e-209
Vasn	7.61559e-213	0.728604	0.483	0.286	1.42214e-208
Lims2	8.85402e-212	0.622098	0.357	0.147	1.6534e-207
S100a13	1.25484e-211	0.598957	0.802	0.699	2.34329e-207
Il6ra	7.72175e-210	0.590511	0.299	0.102	1.44196e-205
Tgfb2	1.04826e-208	0.629886	0.281	0.091	1.95753e-204
Rock2	1.15674e-206	0.665363	0.666	0.528	2.16009e-202
Dbn1	1.03263e-200	0.654274	0.502	0.311	1.92833e-196
Osr2	9.31234e-196	0.490008	0.222	0.054	1.73899e-191
Adamtsl4	1.22689e-194	0.513431	0.233	0.063	2.2911e-190
Gpc6	1.61923e-190	0.619756	0.376	0.171	3.02375e-186
Timp3	2.32074e-190	0.239568	0.835	0.597	4.33376e-186
Rps3a1	1.0407e-189	0.323267	0.966	0.891	1.94341e-185
Sema3b	4.42073e-189	0.538395	0.243	0.072	8.25528e-185
Glud1	2.64249e-188	0.623609	0.615	0.483	4.93459e-184
Rps10	1.61531e-187	0.362886	0.936	0.836	3.01644e-183
Flnb	8.83222e-186	0.54521	0.296	0.112	1.64933e-181
Fhl1	3.05183e-185	0.592146	0.57	0.378	5.69899e-181
Uqcc2	9.44037e-185	0.737976	0.637	0.504	1.76289e-180
Rps24	3.41736e-184	0.330991	0.969	0.88	6.38158e-180
Ebf2	1.13813e-183	0.694763	0.617	0.485	2.12534e-179
Gngt2	3.25432e-183	0.644117	0.443	0.251	6.07711e-179
Cd47	8.94242e-183	0.43828	0.867	0.805	1.66991e-178
Fgf2	1.63263e-181	0.527536	0.243	0.075	3.04876e-177
S100a11	6.7156e-180	0.508411	0.885	0.772	1.25407e-175
Ddah2	1.14412e-179	0.508416	0.706	0.578	2.13652e-175
Il18	2.12472e-179	0.531583	0.232	0.07	3.9677e-175
Rps15	5.74559e-178	0.430995	0.942	0.821	1.07293e-173
Il33	6.50193e-178	0.668669	0.401	0.194	1.21417e-173
Sirpa	8.21202e-178	0.601356	0.369	0.18	1.53351e-173
Nbl1	1.1267e-173	0.32072	0.715	0.513	2.10401e-169
Rps4x	3.33207e-172	0.322177	0.957	0.888	6.22231e-168
Plau	5.093e-172	0.594538	0.271	0.096	9.51067e-168
Ptgs1	9.38929e-171	0.537141	0.227	0.068	1.75336e-166
Efna5	2.85115e-170	0.479904	0.201	0.053	5.32424e-166
Il4ra	3.81414e-168	0.671153	0.357	0.179	7.12253e-164
Sulf1	1.69838e-167	0.618382	0.426	0.247	3.17156e-163
Gm42418	4.01277e-161	1.04973	0.769	0.67	7.49344e-157
Klf3	9.64127e-161	0.601288	0.535	0.378	1.80041e-156
Atp2b1	1.20503e-159	0.587674	0.61	0.497	2.25027e-155
mt-Nd1	2.518e-158	0.809899	0.265	0.091	4.70211e-154
Plce1	3.98068e-156	0.489191	0.243	0.084	7.43353e-152
Zbtb20	1.07535e-147	0.374324	0.911	0.86	2.00811e-143
Hdac7	1.53602e-147	0.606881	0.386	0.221	2.86837e-143
Psd3	1.70417e-145	0.507727	0.274	0.113	3.18237e-141
mt-Nd5	4.59074e-144	0.651371	0.318	0.138	8.57275e-140
Pygl	4.52115e-143	0.491077	0.269	0.112	8.44279e-139
Myh10	1.56887e-141	0.531293	0.303	0.141	2.92972e-137
Ecm1	2.9409e-139	0.381112	0.724	0.552	5.49184e-135
Slc4a4	1.67852e-138	0.575251	0.383	0.216	3.13448e-134
Cavin1	3.43446e-135	0.489525	0.729	0.639	6.4135e-131
Slco3a1	1.43377e-134	0.533507	0.38	0.218	2.67742e-130
Crip1	7.99429e-134	0.531638	0.849	0.707	1.49285e-129
Actg1	1.77786e-133	0.355641	0.85	0.7	3.31997e-129
Kif2a	2.1752e-131	0.57753	0.418	0.269	4.06197e-127
Col6a6	3.26051e-131	0.588624	0.202	0.067	6.08868e-127
Uap1	4.84039e-129	0.714815	0.543	0.448	9.03895e-125
Plxna1	2.00296e-128	0.472551	0.246	0.103	3.74033e-124
Bmp1	4.24713e-127	0.523252	0.631	0.544	7.9311e-123
St3gal2	8.41445e-127	0.525409	0.396	0.243	1.57132e-122
Tshz2	7.82508e-125	0.467263	0.659	0.579	1.46126e-120
Klf2	1.11318e-121	0.48488	0.627	0.444	2.07876e-117
Errfi1	2.2061e-118	0.566596	0.598	0.47	4.11966e-114
Ahnak2	2.74524e-117	0.456195	0.585	0.437	5.12647e-113
Ptgs2	6.89427e-117	0.644916	0.206	0.077	1.28744e-112
Cd164	2.81558e-114	0.525056	0.556	0.441	5.25781e-110
Rpl23	4.9573e-114	0.279729	0.963	0.88	9.25726e-110
Rpl13	3.1719e-113	0.231699	0.975	0.923	5.92321e-109
mt-Co1	8.7923e-113	1.16615	0.222	0.088	1.64187e-108
Dock4	9.72419e-113	0.443145	0.21	0.083	1.8159e-108
Nptn	3.61107e-112	0.503913	0.589	0.51	6.7433e-108
Rack1	4.5004e-111	0.33277	0.871	0.8	8.40404e-107
Rps11	1.73651e-110	0.28296	0.949	0.873	3.24276e-106
Stxbp6	3.91588e-110	0.417469	0.232	0.098	7.31252e-106
Ehd1	6.74748e-110	0.527127	0.46	0.345	1.26002e-105
Aspn	1.7292e-107	0.457667	0.595	0.453	3.22911e-103
Lama4	3.39761e-107	0.49619	0.563	0.469	6.3447e-103
Rab32	9.80707e-107	0.427097	0.202	0.082	1.83137e-102
Antxr2	1.02773e-104	0.46262	0.517	0.387	1.91919e-100
Npr1	5.0127e-104	0.529458	0.349	0.218	9.36071e-100
Triobp	1.3803e-103	0.531989	0.393	0.264	2.57757e-99
Tpt1	4.21613e-103	0.212887	0.97	0.91	7.8732e-99
Xist	1.52286e-102	0.344519	0.831	0.77	2.84379e-98
Dcbld2	3.17519e-102	0.467659	0.331	0.194	5.92936e-98
Eef1a1	2.93821e-99	0.209101	0.969	0.913	5.48681e-95
Tns1	8.21603e-99	0.438993	0.455	0.319	1.53426e-94
Cdkn1c	1.0768e-97	0.605898	0.367	0.227	2.01081e-93
Arsi	1.94443e-97	0.408385	0.252	0.125	3.63102e-93
Eef1b2	3.22534e-97	0.310328	0.864	0.782	6.02299e-93
S100a6	3.54749e-97	0.317082	0.95	0.825	6.62458e-93
Lars2	1.79485e-96	0.558719	0.406	0.264	3.35169e-92
C1qtnf1	2.89326e-96	0.436232	0.331	0.192	5.40287e-92
Cast	5.54239e-96	0.459557	0.583	0.508	1.03499e-91
Cpne8	9.08219e-95	0.383948	0.238	0.112	1.69601e-90
Cmip	1.06245e-94	0.438988	0.252	0.128	1.98401e-90
Clip1	5.6775e-94	0.485841	0.379	0.256	1.06022e-89
Megf9	1.78529e-93	0.420409	0.234	0.113	3.33385e-89
Rhoa	6.878e-92	0.3675	0.778	0.733	1.2844e-87
Rps8	4.23531e-91	0.247975	0.945	0.844	7.90901e-87
Agpat4	8.05305e-91	0.520888	0.401	0.289	1.50383e-86
Rpl7	1.16691e-90	0.267358	0.919	0.852	2.17909e-86
Medag	5.63918e-90	0.395617	0.644	0.574	1.05306e-85
Arhgap29	3.68574e-88	0.542271	0.416	0.311	6.88274e-84
Arhgap20	2.17796e-87	0.415984	0.32	0.185	4.06712e-83
Spag9	4.22164e-87	0.466395	0.538	0.46	7.88349e-83
Grb10	9.10601e-87	0.500885	0.473	0.38	1.70046e-82
Prkca	2.57406e-86	0.387083	0.252	0.131	4.80679e-82
Irak3	5.60763e-86	0.42717	0.289	0.164	1.04717e-81
Rpl37a	1.66077e-84	0.365197	0.935	0.842	3.10131e-80
Has1	1.8188e-84	0.641914	0.291	0.166	3.39643e-80
Apbb2	1.45254e-83	0.446342	0.31	0.189	2.71248e-79
Vegfd	5.26969e-83	0.470853	0.291	0.169	9.84062e-79
Dock11	6.92898e-83	0.382176	0.231	0.116	1.29392e-78
Rps14	1.29643e-82	0.255064	0.967	0.916	2.42095e-78
Pdpn	3.41015e-82	0.465232	0.378	0.261	6.36812e-78
Fau	3.51457e-82	0.301325	0.912	0.836	6.56311e-78
Lgi2	1.79747e-81	0.42949	0.348	0.222	3.3566e-77
Gnpnat1	3.99717e-81	0.527648	0.409	0.314	7.46431e-77
Myl6	5.22392e-81	0.280809	0.835	0.733	9.75514e-77
Vgll3	6.78954e-80	0.442743	0.32	0.202	1.26788e-75
Cxcl13	2.02896e-79	0.651006	0.337	0.197	3.78888e-75
Rab7b	3.08399e-79	0.407205	0.337	0.217	5.75904e-75
Epb41l3	9.05769e-79	0.39339	0.257	0.144	1.69143e-74
Bag1	1.60045e-77	0.38834	0.631	0.579	2.98869e-73
Csrp2	6.48384e-77	0.284586	0.641	0.542	1.21079e-72
Tmem158	1.90515e-76	0.458354	0.339	0.221	3.55768e-72
Rps20	4.2297e-76	0.205339	0.955	0.86	7.89855e-72
Ybx3	4.80452e-76	0.347199	0.69	0.657	8.97196e-72
Rps5	1.13457e-75	0.237923	0.957	0.897	2.11869e-71
Sec14l1	1.60533e-75	0.461248	0.346	0.239	2.9978e-71
Rpl22	7.50792e-75	0.295754	0.862	0.804	1.40203e-70
Vldlr	7.98897e-74	0.429802	0.305	0.189	1.49186e-69
Fam126a	1.74654e-73	0.37446	0.215	0.111	3.26148e-69
Pdlim1	2.99795e-73	0.427741	0.348	0.241	5.59837e-69
Fam129a	3.90958e-72	0.432923	0.436	0.339	7.30074e-68
Rap1a	8.27505e-72	0.407503	0.595	0.55	1.54528e-67
Col12a1	2.13749e-71	0.477518	0.242	0.135	3.99155e-67
Dact1	8.31976e-71	0.341868	0.341	0.216	1.55363e-66
Meg3	9.68749e-71	0.409879	0.752	0.653	1.80904e-66
Rps26	3.60153e-70	0.260556	0.885	0.784	6.72549e-66
Dnm1	4.07966e-69	0.372584	0.236	0.131	7.61835e-65
Smurf2	1.01779e-68	0.398639	0.252	0.148	1.90063e-64
Gprc5b	1.78493e-67	0.447903	0.326	0.227	3.33317e-63
Rhou	1.93305e-67	0.427511	0.257	0.157	3.60977e-63
Vcan	1.27038e-66	0.455808	0.482	0.408	2.37231e-62
Flnc	1.82414e-66	0.41283	0.272	0.171	3.4064e-62
Dst	2.57582e-65	0.43662	0.45	0.363	4.8101e-61
Calm1	1.19451e-64	0.27845	0.846	0.812	2.23063e-60
Diaph1	2.57251e-64	0.385915	0.333	0.226	4.8039e-60
Rpl35a	5.47443e-64	0.273053	0.959	0.895	1.0223e-59
mt-Nd4l	1.4847e-62	0.412506	0.398	0.279	2.77254e-58
Plxdc2	1.76614e-62	0.263945	0.677	0.607	3.29809e-58
Kdelc2	3.72189e-62	0.403751	0.378	0.284	6.95026e-58
Tubb2b	4.43811e-62	0.370637	0.249	0.148	8.28773e-58
Ckb	1.0292e-61	0.446845	0.42	0.332	1.92193e-57
Sod3	1.83702e-61	0.352596	0.569	0.497	3.43045e-57
Sulf2	3.75479e-61	0.328922	0.262	0.157	7.0117e-57
Fgf18	1.18525e-59	0.333043	0.227	0.13	2.21333e-55
Gstm1	4.23599e-59	0.290588	0.789	0.734	7.91028e-55
Add3	1.10308e-58	0.332703	0.577	0.513	2.05989e-54
Sptbn1	2.04366e-58	0.231449	0.821	0.806	3.81633e-54
Zfp36l1	1.11928e-57	0.395044	0.707	0.658	2.09014e-53
Rps13	1.87177e-57	0.211895	0.927	0.86	3.49534e-53
Rhoq	2.37494e-57	0.406373	0.378	0.291	4.43496e-53
Ugp2	7.14394e-57	0.399815	0.476	0.419	1.33406e-52
C1galt1	5.16906e-56	0.369018	0.25	0.156	9.65271e-52
Xdh	1.93353e-55	0.376153	0.449	0.378	3.61067e-51
Ptp4a2	2.08427e-55	0.324594	0.678	0.669	3.89216e-51
Foxp1	1.09126e-54	0.380444	0.42	0.336	2.03782e-50
Mylip	1.63419e-54	0.39388	0.28	0.187	3.05169e-50
Kcnq1ot1	2.27545e-54	0.534106	0.561	0.523	4.24918e-50
Epb41l2	2.53806e-54	0.351115	0.582	0.549	4.73957e-50
Nisch	2.38043e-52	0.367993	0.539	0.512	4.44522e-48
Lima1	4.47754e-52	0.30542	0.67	0.673	8.36136e-48
Tacc2	8.47404e-52	0.341005	0.236	0.146	1.58244e-47
Calu	1.85858e-51	0.316203	0.702	0.686	3.47071e-47
Nin	2.6758e-51	0.35031	0.243	0.153	4.99678e-47
Jak1	4.74579e-51	0.349592	0.634	0.63	8.86229e-47
Zeb1	5.00509e-51	0.373994	0.42	0.342	9.34651e-47
Plekho2	1.57255e-50	0.347526	0.254	0.167	2.93658e-46
Rac1	2.42032e-50	0.298013	0.697	0.665	4.51971e-46
Thbs3	1.07297e-49	0.271455	0.363	0.253	2.00366e-45
Galnt1	2.88813e-48	0.417086	0.387	0.325	5.39328e-44
Fam171b	9.91654e-48	0.373782	0.228	0.145	1.85181e-43
Samhd1	1.0558e-47	0.395389	0.337	0.259	1.9716e-43
Dpysl3	1.31207e-47	0.365417	0.488	0.441	2.45015e-43
Pxn	3.08409e-47	0.3496	0.243	0.16	5.75923e-43
Lamc1	6.07141e-47	0.291561	0.661	0.638	1.13378e-42
Notch2	6.09408e-47	0.399517	0.208	0.127	1.13801e-42
Utrn	1.30172e-46	0.383976	0.339	0.259	2.43084e-42
Ramp2	1.43965e-46	0.316456	0.625	0.588	2.6884e-42
Srgap1	3.06974e-45	0.358232	0.24	0.16	5.73242e-41
Abca1	3.64317e-45	0.390074	0.326	0.243	6.80326e-41
Thy1	1.14017e-44	0.360886	0.555	0.488	2.12916e-40
Lrrc17	1.43847e-44	0.325998	0.328	0.243	2.6862e-40
Tbc1d12	1.51748e-44	0.308181	0.204	0.125	2.83374e-40
Ralbp1	5.29947e-44	0.315808	0.606	0.594	9.89623e-40
Vat1	1.1336e-43	0.324514	0.566	0.537	2.11688e-39
Sord	6.92441e-43	0.332742	0.224	0.143	1.29306e-38
Atox1	9.00495e-43	0.324466	0.664	0.613	1.68158e-38
Fbln5	1.17257e-42	0.247363	0.55	0.476	2.18966e-38
Wnk1	2.13452e-42	0.376617	0.506	0.483	3.986e-38
Clec2d	3.91394e-42	0.377751	0.385	0.32	7.30889e-38
Ar	2.77961e-41	0.28124	0.54	0.474	5.19064e-37
Spon2	2.91225e-40	0.279119	0.271	0.186	5.43833e-36
Tshz1	4.14447e-40	0.343861	0.24	0.164	7.73939e-36
Rap1b	1.12998e-39	0.311504	0.613	0.606	2.11013e-35
Agap1	5.04409e-39	0.294521	0.256	0.177	9.41934e-35
Sash1	9.38655e-39	0.356821	0.459	0.415	1.75284e-34
Pxdn	1.50548e-38	0.340712	0.255	0.181	2.81133e-34
Tgfbr3	1.02009e-37	0.330482	0.54	0.518	1.90491e-33
Anpep	2.98215e-37	0.303173	0.329	0.253	5.56888e-33
Sntb2	5.50401e-37	0.339916	0.524	0.513	1.02782e-32
Cited2	7.51881e-37	0.361528	0.39	0.33	1.40406e-32
Nfkbia	3.00415e-36	0.335837	0.653	0.602	5.60996e-32
Smim14	2.0776e-35	0.268046	0.68	0.683	3.87972e-31
Nckap1	2.89594e-35	0.367581	0.396	0.354	5.40789e-31
Glul	8.1708e-35	0.326355	0.46	0.393	1.52582e-30
Thbs2	9.93515e-35	0.252958	0.323	0.247	1.85529e-30
Clasp1	3.19797e-34	0.311524	0.207	0.14	5.97188e-30
Snx21	6.02853e-34	0.355487	0.265	0.201	1.12577e-29
Dsel	1.15303e-33	0.323139	0.274	0.207	2.15318e-29
Dock7	8.8296e-33	0.347197	0.321	0.26	1.64884e-28
Lbp	3.93395e-32	0.450531	0.351	0.299	7.34625e-28
Zfhx3	7.1603e-32	0.349364	0.362	0.312	1.33712e-27
Rps6ka3	2.36834e-31	0.370282	0.31	0.257	4.42264e-27
Cyfip1	3.03854e-31	0.331336	0.383	0.336	5.67417e-27
Abi3bp	3.48789e-31	0.247016	0.572	0.511	6.51328e-27
Wls	4.55191e-31	0.322203	0.419	0.383	8.50024e-27
Csgalnact2	1.10185e-30	0.327524	0.282	0.221	2.0576e-26
Efcab14	1.6999e-30	0.335473	0.318	0.266	3.1744e-26
Slc25a24	4.30018e-30	0.290857	0.218	0.153	8.03016e-26
Lrch3	5.11421e-30	0.320754	0.244	0.18	9.55028e-26
Reck	8.69097e-30	0.255907	0.211	0.143	1.62295e-25
Epdr1	1.43287e-29	0.277587	0.238	0.17	2.67574e-25
Asap2	2.81766e-29	0.282725	0.212	0.15	5.26169e-25
Mindy2	3.12811e-29	0.316655	0.312	0.256	5.84143e-25
Rabgap1l	3.4405e-29	0.253998	0.212	0.146	6.42478e-25
Gxylt2	4.64171e-29	0.244839	0.37	0.301	8.66793e-25
Nmt2	6.30351e-29	0.290433	0.205	0.145	1.17712e-24
Il1rl2	9.95189e-29	0.333004	0.215	0.156	1.85842e-24
Rpl21	7.54685e-28	0.219854	0.881	0.836	1.4093e-23
Eif4g2	8.97816e-28	0.254012	0.686	0.684	1.67658e-23
Pcsk5	2.07902e-27	0.258468	0.213	0.15	3.88237e-23
Tspan5	9.02561e-27	0.240074	0.226	0.163	1.68544e-22
Lpar1	7.15792e-26	0.292305	0.471	0.451	1.33667e-21
Pde3a	4.6273e-25	0.307637	0.227	0.172	8.64101e-21
Arl4a	1.02996e-24	0.325662	0.423	0.39	1.92334e-20
Atp6v1e1	1.64467e-24	0.36114	0.393	0.374	3.07126e-20
Syne2	7.9627e-24	0.272794	0.26	0.204	1.48695e-19
Plac8	2.66146e-23	0.332606	0.336	0.262	4.97001e-19
Dtnbp1	6.35183e-23	0.300662	0.504	0.516	1.18614e-18
Stk38	8.28666e-23	0.311261	0.323	0.284	1.54745e-18
Rpl38	8.83381e-23	0.24776	0.766	0.725	1.64963e-18
Tmem43	1.22716e-22	0.284251	0.274	0.226	2.29161e-18
Adam17	1.76097e-21	0.322102	0.255	0.212	3.28844e-17
Pacsin2	2.71448e-21	0.270805	0.232	0.183	5.06902e-17
Itgb5	5.91902e-21	0.288001	0.473	0.471	1.10532e-16
Slc44a1	9.68536e-21	0.270924	0.325	0.288	1.80864e-16
Map1b	1.21231e-20	0.294857	0.348	0.315	2.26387e-16
Camk2n1	1.3399e-20	0.275496	0.353	0.309	2.50214e-16
Filip1l	1.94336e-20	0.246684	0.365	0.32	3.62904e-16
Igf1r	4.27948e-20	0.28069	0.277	0.232	7.9915e-16
Abl1	6.07114e-20	0.257632	0.228	0.182	1.13373e-15
Ifi204	6.54285e-20	0.2165	0.602	0.584	1.22181e-15
Naaa	1.64308e-19	0.296128	0.314	0.277	3.06828e-15
Fam208a	2.6306e-19	0.26906	0.26	0.213	4.91238e-15
Emp3	3.30912e-19	0.208147	0.727	0.746	6.17946e-15
Carhsp1	5.93313e-19	0.326607	0.41	0.403	1.10795e-14
Zeb2	9.07454e-19	0.256841	0.591	0.62	1.69458e-14
Sh3pxd2b	1.05085e-18	0.341954	0.302	0.271	1.96236e-14
Sppl2a	1.41326e-18	0.282455	0.337	0.304	2.63912e-14
Mbd2	2.51431e-18	0.278253	0.43	0.429	4.69523e-14
Atf3	3.29335e-18	0.243727	0.451	0.387	6.15e-14
Npepl1	6.05551e-18	0.245958	0.224	0.18	1.13081e-13
Cep170	7.33138e-18	0.308516	0.309	0.28	1.36906e-13
Abi1	1.02001e-17	0.291411	0.267	0.231	1.90476e-13
Clic4	1.18346e-17	0.248282	0.516	0.514	2.21e-13
Adamtsl1	2.15476e-17	0.223861	0.363	0.32	4.02379e-13
Steap3	2.88116e-17	0.265183	0.445	0.438	5.38027e-13
Rala	3.16167e-17	0.272042	0.483	0.501	5.90411e-13
Thra	5.32058e-17	0.267312	0.435	0.428	9.93564e-13
Aig1	1.28837e-16	0.296024	0.275	0.242	2.4059e-12
Adam33	1.49557e-16	0.246959	0.291	0.243	2.79283e-12
Rps29	2.75943e-16	0.224314	0.853	0.821	5.15296e-12
Prkd3	5.46298e-16	0.252854	0.234	0.194	1.02016e-11
Nav3	9.17069e-16	0.287855	0.207	0.171	1.71254e-11
Srgap2	1.2463e-15	0.231472	0.205	0.166	2.32734e-11
Fer	2.22538e-15	0.233008	0.242	0.204	4.15568e-11
Mmp14	2.2416e-15	0.206113	0.661	0.662	4.18597e-11
Pfkp	3.14488e-15	0.284071	0.309	0.285	5.87274e-11
Nfe2l2	4.00573e-15	0.291627	0.411	0.414	7.48029e-11
Rgl1	6.12233e-15	0.2316	0.246	0.209	1.14328e-10
Twsg1	7.21325e-15	0.23812	0.342	0.309	1.347e-10
Samd4b	8.2443e-15	0.277283	0.3	0.275	1.53954e-10
Klhl13	1.01562e-14	0.232098	0.25	0.213	1.89657e-10
Esyt2	3.12202e-14	0.287738	0.35	0.335	5.83006e-10
Hnrnph1	3.394e-14	0.271533	0.507	0.51	6.33796e-10
Lnpep	6.34262e-14	0.271181	0.355	0.34	1.18442e-09
Efhd2	6.40798e-14	0.24548	0.204	0.169	1.19663e-09
Itgav	8.27137e-14	0.264695	0.277	0.25	1.5446e-09
BC005537	1.38797e-13	0.253525	0.475	0.498	2.59189e-09
Clstn1	2.1473e-13	0.225212	0.281	0.25	4.00987e-09
Csf1	5.83753e-13	0.233582	0.474	0.481	1.0901e-08
Sh3d19	7.76209e-13	0.239615	0.373	0.359	1.44949e-08
Ctdsp2	8.67655e-13	0.270564	0.47	0.495	1.62026e-08
Zfhx4	9.79731e-13	0.232332	0.393	0.38	1.82955e-08
Hook3	1.44908e-12	0.265301	0.42	0.425	2.706e-08
Ece1	1.68324e-12	0.249928	0.295	0.272	3.14328e-08
Blvrb	2.39559e-12	0.220237	0.524	0.549	4.47353e-08
Arhgap42	2.5176e-12	0.220335	0.209	0.176	4.70137e-08
Sspn	2.667e-12	0.23386	0.268	0.238	4.98035e-08
Trip10	2.75086e-12	0.248222	0.354	0.347	5.13695e-08
Rtn3	5.30935e-12	0.246238	0.481	0.509	9.91468e-08
Wipf1	6.40776e-12	0.226277	0.301	0.275	1.19659e-07
Micu1	1.10303e-11	0.2256	0.225	0.197	2.05979e-07
Edem2	2.76e-11	0.234511	0.236	0.211	5.15403e-07
Mia3	7.71654e-11	0.276878	0.41	0.423	1.44099e-06
Trim30a	7.9479e-11	0.291949	0.263	0.239	1.48419e-06
Lpp	8.78172e-11	0.251942	0.446	0.469	1.6399e-06
Rbms3	1.42843e-10	0.206393	0.407	0.401	2.66746e-06
Prdx5	2.13957e-10	0.235989	0.604	0.635	3.99543e-06
Ttc28	2.3997e-10	0.252145	0.317	0.304	4.48121e-06
Top2b	2.54686e-10	0.253986	0.359	0.359	4.756e-06
Arhgap17	3.37651e-10	0.210149	0.202	0.173	6.30529e-06
Pmm1	5.90472e-10	0.366944	0.345	0.357	1.10265e-05
Adam10	6.44034e-10	0.22935	0.204	0.179	1.20267e-05
Taok3	6.74154e-10	0.22894	0.291	0.273	1.25892e-05
Camk2d	6.94826e-10	0.246022	0.352	0.35	1.29752e-05
Cdc42ep2	1.63817e-09	0.25418	0.305	0.295	3.05912e-05
Zfp638	1.77581e-09	0.234085	0.288	0.273	3.31615e-05
Twist1	2.328e-09	0.245528	0.337	0.334	4.34731e-05
Pbx1	2.47724e-09	0.21737	0.376	0.375	4.626e-05
Afap1	3.38244e-09	0.216653	0.254	0.234	6.31637e-05
Pbxip1	9.27923e-09	0.228335	0.343	0.344	0.00017328
Pbrm1	1.97026e-08	0.232288	0.469	0.504	0.000367927
Akr1b8	2.04957e-08	0.278874	0.287	0.282	0.000382737
Tns2	3.06469e-08	0.221976	0.309	0.299	0.0005723
Nsa2	3.39892e-08	0.233525	0.443	0.472	0.000634713
Aida	7.52081e-08	0.247151	0.435	0.465	0.00140444
Cltb	7.7041e-08	0.223809	0.446	0.477	0.00143866
Iqgap1	9.60842e-08	0.220069	0.453	0.484	0.00179428
Lgals3	1.04888e-07	0.243997	0.301	0.284	0.00195867
Dync1h1	2.39195e-07	0.270281	0.373	0.388	0.00446673
Trim35	2.73604e-07	0.254364	0.34	0.347	0.00510928
Lgals9	5.69571e-07	0.250924	0.375	0.388	0.0106362
Pdlim5	6.94119e-07	0.206522	0.224	0.207	0.012962
Rb1cc1	7.0232e-07	0.217154	0.33	0.332	0.0131151
Limd1	7.8812e-07	0.244945	0.272	0.269	0.0147173
Fez2	8.73319e-07	0.209502	0.256	0.245	0.0163084
Acadsb	8.92948e-07	0.221961	0.279	0.272	0.0166749
Acly	1.66858e-06	0.238935	0.259	0.253	0.031159
Bmpr2	1.93602e-06	0.212498	0.292	0.287	0.0361533
Ppa1	2.5553e-06	0.262854	0.339	0.351	0.0477176
Tra2a	3.81386e-06	0.233916	0.369	0.387	0.07122
Setd7	4.51224e-06	0.200844	0.223	0.21	0.0842616
Picalm	5.33856e-06	0.253454	0.344	0.363	0.0996922
Cnot6	1.0419e-05	0.233608	0.258	0.255	0.194564
Nfkb1	1.17261e-05	0.234105	0.31	0.319	0.218974
Ddx6	1.34321e-05	0.20018	0.364	0.374	0.250831
Pdcd6ip	1.37974e-05	0.233449	0.344	0.363	0.257653
Taok1	2.01281e-05	0.207722	0.33	0.339	0.375871
Ssc5d	3.38663e-05	0.212573	0.23	0.221	0.632419
Elf1	3.77425e-05	0.203541	0.308	0.312	0.704804
Ang	3.91456e-05	0.250678	0.329	0.346	0.731005
Foxo1	4.1461e-05	0.222784	0.237	0.23	0.774243
Dlgap4	7.82069e-05	0.211618	0.361	0.385	1
Dapk1	9.83828e-05	0.221237	0.367	0.387	1
Loxl2	0.000128994	0.218234	0.483	0.535	1
Eif4b	0.000276366	0.204109	0.386	0.421	1
Tmbim1	0.000367624	0.214069	0.263	0.264	1
Lasp1	0.000899383	0.230831	0.361	0.396	1
Jmjd1c	0.00148671	0.206223	0.331	0.349	1
Amotl2	0.00205502	0.211327	0.277	0.283	1
Ergic1	0.00253621	0.203906	0.288	0.304	1
Nol7	0.00274492	0.206864	0.374	0.408	1
Celf1	0.00773944	0.231698	0.262	0.276	1
Ywhaz	0.010468	0.206609	0.427	0.482	1
Zbp1	0.0294384	0.216627	0.229	0.235	1

## Sheet: ASC3
	p_val	avg_logFC	pct.1	pct.2	p_val_adj
Apod	0	2.25649	0.684	0.256	0
Inmt	0	1.98313	0.583	0.116	0
Mgp	0	1.97184	0.646	0.204	0
Cst3	0	1.77731	0.883	0.717	0
Gdf10	0	1.72346	0.566	0.143	0
Mfap4	0	1.70284	0.332	0.087	0
Gas6	0	1.62113	0.622	0.214	0
Fbln1	0	1.57536	0.769	0.287	0
Cygb	0	1.57471	0.9	0.516	0
Tgfbi	0	1.525	0.643	0.187	0
F3	0	1.51247	0.726	0.423	0
Cfh	0	1.47413	0.561	0.101	0
Fmo2	0	1.43047	0.451	0.046	0
Rbp1	0	1.25146	0.691	0.351	0
Igfbp7	0	1.24352	0.925	0.607	0
Itgbl1	0	1.1922	0.413	0.043	0
Ltbp4	0	1.17039	0.687	0.335	0
Clec11a	0	1.1672	0.463	0.134	0
Cd9	0	1.16447	0.802	0.326	0
Pdgfrl	0	1.11108	0.385	0.12	0
Tspan11	0	1.09814	0.386	0.057	0
Bgn	0	1.03331	0.833	0.532	0
C2	0	0.982192	0.436	0.137	0
Selenop	0	0.951946	0.885	0.709	0
Igfbp4	0	0.948788	0.873	0.729	0
Pid1	0	0.946698	0.48	0.149	0
Chrdl1	0	0.942104	0.405	0.111	0
C7	0	0.934918	0.224	0.005	0
Nr2f2	0	0.917563	0.387	0.12	0
Entpd2	0	0.914743	0.705	0.468	0
Vit	0	0.894004	0.363	0.061	0
Il11ra1	0	0.888925	0.799	0.564	0
Cpe	0	0.87868	0.306	0.045	0
Gsn	0	0.854937	0.976	0.801	0
Podn	0	0.850329	0.485	0.2	0
Meox2	0	0.847	0.417	0.148	0
Serping1	0	0.772115	0.952	0.835	0
Abcc9	0	0.768663	0.26	0.018	0
Dcn	0	0.707517	0.977	0.914	0
Epha3	0	0.660351	0.232	0.013	0
Serpinf1	0	0.656002	0.921	0.828	0
Mmp3	1.28801e-287	1.62447	0.397	0.143	2.40522e-283
Ppl	9.40317e-285	0.593333	0.262	0.05	1.75595e-280
Cryab	3.40738e-281	0.756315	0.529	0.258	6.36294e-277
Dkk3	5.37535e-280	0.625848	0.243	0.043	1.00379e-275
Penk	2.89228e-263	1.00643	0.278	0.068	5.40105e-259
Spock2	8.3278e-260	0.570494	0.246	0.05	1.55513e-255
Fth1	4.10573e-258	0.582725	0.94	0.944	7.66704e-254
Cxcl12	6.7448e-246	1.14994	0.658	0.435	1.25952e-241
Gabra3	4.82052e-237	0.544289	0.251	0.057	9.00183e-233
Ntrk2	3.7517e-234	0.713931	0.502	0.262	7.00593e-230
Fos	1.78583e-225	0.668792	0.84	0.723	3.33486e-221
Lamb2	3.29544e-223	0.66996	0.532	0.298	6.15391e-219
Itm2b	2.23292e-215	0.378377	0.951	0.909	4.16975e-211
Ndrg2	4.62595e-210	0.781542	0.371	0.16	8.6385e-206
Dbp	4.91004e-209	0.748598	0.44	0.214	9.16902e-205
Arhgdib	2.90012e-207	0.707683	0.237	0.062	5.41568e-203
Abca8a	3.51593e-203	0.552762	0.705	0.49	6.56564e-199
Jun	2.36736e-202	0.648162	0.813	0.687	4.4208e-198
Gpnmb	1.58911e-193	0.658285	0.319	0.123	2.9675e-189
Ifitm1	2.34102e-189	1.15209	0.225	0.06	4.37162e-185
Col1a2	1.3772e-183	0.651675	0.911	0.856	2.57178e-179
Gas1	6.28615e-183	0.757003	0.614	0.432	1.17388e-178
Pmepa1	1.41236e-182	0.672885	0.5	0.296	2.63744e-178
Nrp1	1.7505e-182	0.816459	0.484	0.3	3.26889e-178
Junb	2.24713e-182	0.659155	0.772	0.604	4.1963e-178
Nfib	6.93838e-182	0.578302	0.789	0.711	1.29567e-177
Fxyd6	8.40989e-182	0.705567	0.268	0.093	1.57046e-177
Olfml3	2.67845e-181	0.833831	0.472	0.282	5.00173e-177
Igf1	5.22133e-179	0.705385	0.544	0.339	9.75032e-175
Cd302	2.29353e-178	0.556266	0.791	0.65	4.28294e-174
Osr1	1.06481e-177	0.734452	0.509	0.293	1.98842e-173
Abi3bp	1.26988e-170	0.514964	0.662	0.473	2.37138e-166
Smoc2	1.62947e-169	0.450347	0.592	0.351	3.04287e-165
Fosb	1.54554e-168	0.637586	0.703	0.53	2.88615e-164
Kitl	1.24864e-162	0.751791	0.344	0.162	2.33171e-158
Lum	5.34913e-162	0.462783	0.86	0.698	9.98897e-158
Col1a1	6.1485e-160	0.731516	0.848	0.798	1.14817e-155
Ubb	8.23916e-156	0.491705	0.883	0.805	1.53858e-151
Igfbp3	1.1781e-155	1.52124	0.295	0.125	2.19999e-151
Pltp	8.04089e-154	0.562726	0.256	0.093	1.50156e-149
Hmcn2	8.60642e-154	0.556191	0.22	0.067	1.60716e-149
Dusp1	7.02154e-151	0.646208	0.728	0.585	1.3112e-146
Gpc3	1.53866e-145	0.614743	0.61	0.425	2.87329e-141
Pcolce	6.48742e-145	0.435776	0.856	0.654	1.21146e-140
Ecm1	4.85159e-143	0.49404	0.72	0.562	9.05986e-139
Sfrp4	6.74086e-140	0.83602	0.368	0.189	1.25879e-135
Hexb	5.42726e-139	0.579472	0.551	0.413	1.01349e-134
Nbl1	1.67141e-138	0.634393	0.691	0.534	3.12118e-134
C1qtnf2	2.30948e-138	0.555796	0.306	0.139	4.31271e-134
Olfml2b	7.89248e-129	0.549093	0.536	0.385	1.47384e-124
Ier3	1.64562e-128	0.619562	0.451	0.277	3.07302e-124
Prnp	3.14312e-128	0.552561	0.543	0.404	5.86946e-124
Ctsl	2.49329e-124	0.416772	0.865	0.808	4.65597e-120
Col4a4	1.76897e-122	0.488054	0.203	0.071	3.30338e-118
Malat1	5.2789e-122	0.342872	0.956	0.855	9.85783e-118
Crispld2	2.4877e-119	0.652922	0.341	0.184	4.64553e-115
Klf9	3.70104e-117	0.486483	0.753	0.642	6.91132e-113
Gstm1	3.13149e-116	0.350019	0.84	0.713	5.84775e-112
Bace2	7.11735e-116	0.539613	0.213	0.084	1.32909e-111
Gadd45g	3.20616e-115	0.697891	0.502	0.338	5.98717e-111
Wnt5a	5.42214e-115	0.554747	0.381	0.221	1.01253e-110
Cped1	1.37594e-108	0.571816	0.41	0.261	2.56944e-104
Srpx	7.43246e-108	0.463085	0.633	0.463	1.38794e-103
Il6st	3.28002e-106	0.551251	0.591	0.495	6.12511e-102
Myl9	5.2956e-105	0.389903	0.335	0.176	9.889e-101
Fgf7	2.28363e-103	0.456327	0.32	0.175	4.26445e-99
C1s1	7.13477e-103	0.402393	0.768	0.69	1.33235e-98
Atp1a2	2.4999e-102	0.497356	0.256	0.122	4.66831e-98
Fmo1	4.99129e-100	0.476811	0.263	0.13	9.32074e-96
Steap4	4.03282e-96	0.488519	0.503	0.349	7.53088e-92
Pmp22	2.45621e-92	0.464371	0.685	0.623	4.58673e-88
Fgl2	6.57169e-89	0.535849	0.351	0.209	1.2272e-84
Ppp1r15a	1.39386e-83	0.477022	0.582	0.453	2.6029e-79
C1qtnf7	2.95546e-82	0.415721	0.284	0.155	5.51903e-78
Icam1	4.56341e-79	0.519644	0.37	0.245	8.52171e-75
Prdx4	1.33811e-78	0.409517	0.651	0.544	2.49878e-74
Fbln2	6.44147e-77	0.492862	0.682	0.618	1.20288e-72
Laptm4a	2.18613e-75	0.300052	0.899	0.867	4.08237e-71
Gm26802	3.64369e-75	0.527914	0.402	0.287	6.80423e-71
Btg2	9.14849e-75	0.459537	0.694	0.597	1.70839e-70
Ctsz	6.86781e-74	0.348527	0.764	0.69	1.28249e-69
Scn7a	1.131e-73	0.40598	0.434	0.314	2.11202e-69
Aebp1	1.90258e-71	0.418867	0.797	0.778	3.55288e-67
Cd81	2.20152e-71	0.341397	0.871	0.772	4.11112e-67
Eln	2.83853e-71	1.20661	0.446	0.34	5.30067e-67
Cebpd	7.48262e-70	0.415852	0.718	0.61	1.3973e-65
Aldh2	6.35861e-68	0.339518	0.699	0.632	1.18741e-63
Svep1	2.10807e-67	0.458883	0.426	0.32	3.93662e-63
Jund	4.55132e-67	0.31638	0.846	0.802	8.49914e-63
Bicc1	1.15445e-66	0.419852	0.627	0.577	2.15583e-62
Dnajc3	6.62821e-66	0.380826	0.63	0.575	1.23775e-61
Csrp2	1.30277e-65	0.450043	0.625	0.554	2.43279e-61
Lsamp	4.18209e-65	0.410537	0.218	0.116	7.80963e-61
Fzd4	9.7999e-65	0.493811	0.386	0.291	1.83003e-60
Ahnak	3.42386e-63	0.34945	0.847	0.806	6.39372e-59
Cdon	9.36925e-63	0.318697	0.304	0.181	1.74961e-58
3632451O06Rik	3.75807e-62	0.35775	0.223	0.126	7.01783e-58
Herpud1	1.11619e-59	0.462265	0.458	0.374	2.08437e-55
Galnt15	1.96182e-59	0.319659	0.227	0.121	3.6635e-55
Ergic3	1.23181e-58	0.387878	0.645	0.586	2.30029e-54
Nfix	1.29739e-58	0.354222	0.714	0.721	2.42274e-54
Nr1d1	2.84345e-57	0.336139	0.358	0.243	5.30986e-53
Id3	1.03484e-56	0.492371	0.665	0.582	1.93246e-52
Tsc22d3	1.46481e-55	0.746247	0.375	0.286	2.73539e-51
C1ra	2.10275e-55	0.380321	0.561	0.5	3.92667e-51
Thbs3	2.33896e-55	0.290985	0.373	0.254	4.36778e-51
Lamp1	3.22021e-54	0.249982	0.826	0.827	6.01342e-50
Adamts10	1.48793e-53	0.341517	0.222	0.13	2.77857e-49
Ecm2	3.72424e-53	0.371249	0.407	0.308	6.95464e-49
Gm2a	1.71835e-52	0.352241	0.321	0.224	3.20884e-48
Dstn	3.05967e-52	0.293049	0.655	0.573	5.71362e-48
Bsg	5.79708e-52	0.296399	0.8	0.751	1.08255e-47
Zfp36	6.47038e-52	0.281492	0.568	0.444	1.20828e-47
Gxylt2	1.44573e-51	0.345259	0.4	0.29	2.69976e-47
Rcn3	2.08225e-51	0.315671	0.763	0.699	3.88839e-47
Klf4	2.44693e-50	0.236335	0.762	0.63	4.56939e-46
Cav1	3.16059e-50	0.335283	0.386	0.292	5.90208e-46
Fzd2	2.1514e-49	0.342219	0.231	0.139	4.01752e-45
Naalad2	2.86042e-49	0.358081	0.343	0.248	5.34155e-45
Rap2a	3.41645e-49	0.350745	0.319	0.227	6.37987e-45
Oat	5.15989e-49	0.324716	0.659	0.611	9.63558e-45
Pdlim2	1.797e-48	0.397586	0.537	0.479	3.35571e-44
Gstt1	2.31798e-48	0.33753	0.527	0.443	4.3286e-44
Prg4	9.91453e-48	0.48007	0.224	0.132	1.85144e-43
Nr4a1	1.26341e-46	0.490162	0.333	0.24	2.35929e-42
Tef	4.0037e-46	0.3031	0.222	0.132	7.47652e-42
Ddost	2.70399e-45	0.350056	0.686	0.638	5.04943e-41
Mbnl1	1.82155e-44	0.366047	0.535	0.494	3.40156e-40
Gstm2	1.22303e-43	0.370998	0.591	0.543	2.28388e-39
Lhfp	2.24573e-43	0.360599	0.53	0.48	4.19368e-39
Tmem59	2.88646e-43	0.309284	0.758	0.717	5.39017e-39
Cyba	1.36161e-42	0.326987	0.657	0.581	2.54267e-38
Sdf4	2.99923e-42	0.330584	0.616	0.573	5.60077e-38
Nupr1	5.00888e-42	0.31256	0.661	0.563	9.35359e-38
Ndn	1.28187e-41	0.332588	0.608	0.584	2.39377e-37
Mxra7	1.73107e-41	0.350756	0.571	0.526	3.2326e-37
Ypel3	2.22716e-41	0.279343	0.632	0.554	4.159e-37
Slit3	2.27878e-41	0.33827	0.478	0.41	4.2554e-37
Sfrp1	1.62824e-40	0.631116	0.222	0.145	3.04058e-36
Myl12b	2.25314e-40	0.350442	0.579	0.534	4.20752e-36
Socs3	5.34804e-40	0.288627	0.536	0.436	9.98694e-36
Thbd	1.1695e-39	0.532623	0.404	0.327	2.18393e-35
Lrp1	3.29859e-39	0.251227	0.757	0.74	6.15978e-35
Fuca1	6.01069e-39	0.332364	0.56	0.526	1.12244e-34
Ntn1	1.4219e-38	0.269976	0.259	0.17	2.65525e-34
Serpina3n	1.73189e-38	0.426326	0.224	0.146	3.23413e-34
Nenf	4.79868e-38	0.255683	0.802	0.784	8.96105e-34
Tnfsf12	6.27976e-38	0.344541	0.422	0.358	1.17268e-33
Col3a1	2.56303e-37	0.313181	0.837	0.815	4.78621e-33
Ar	4.67051e-37	0.273742	0.545	0.475	8.72171e-33
Ctsf	1.37031e-36	0.300292	0.298	0.22	2.55891e-32
Dpp7	1.90561e-36	0.286032	0.224	0.15	3.55853e-32
Fam71a	2.05226e-36	0.304512	0.211	0.135	3.83238e-32
Pik3ip1	2.99244e-36	0.255163	0.228	0.146	5.58808e-32
Angptl1	4.48013e-36	0.580587	0.372	0.307	8.3662e-32
Adh1	7.15056e-36	0.452821	0.232	0.158	1.3353e-31
Adam33	6.60642e-35	0.238899	0.322	0.231	1.23368e-30
Peg3	4.3843e-33	0.398278	0.284	0.215	8.18724e-29
Rabac1	5.35469e-33	0.225479	0.793	0.756	9.99935e-29
Pik3r1	6.50373e-33	0.300515	0.401	0.333	1.21451e-28
Nox4	2.5718e-32	0.266928	0.23	0.154	4.80258e-28
Tm7sf3	2.42006e-31	0.32338	0.333	0.271	4.51922e-27
Tprgl	3.13605e-31	0.306727	0.54	0.512	5.85626e-27
Ghr	3.16412e-31	0.304313	0.261	0.191	5.90868e-27
Ctsb	3.2754e-31	0.250368	0.807	0.785	6.11649e-27
Lrpap1	4.20583e-31	0.325696	0.495	0.461	7.85397e-27
Ggh	8.09501e-31	0.324556	0.474	0.435	1.51166e-26
Adm	1.39652e-30	0.384929	0.209	0.141	2.60787e-26
Fkbp9	2.04315e-30	0.248776	0.702	0.671	3.81539e-26
Selenom	2.86197e-30	0.246944	0.801	0.755	5.34444e-26
Ifitm2	3.31075e-30	0.212287	0.883	0.843	6.18249e-26
Nrip1	7.58578e-30	0.390152	0.389	0.337	1.41657e-25
C4b	2.14302e-29	0.52728	0.276	0.21	4.00187e-25
Gem	3.38605e-29	0.317016	0.422	0.362	6.32312e-25
Emp1	3.8191e-29	0.292092	0.607	0.542	7.1318e-25
Ier2	1.34511e-28	0.299903	0.598	0.519	2.51186e-24
Map1lc3a	7.70558e-28	0.244636	0.641	0.587	1.43894e-23
Sparc	8.83578e-27	0.337613	0.846	0.856	1.64999e-22
Mtch1	3.17724e-26	0.234714	0.676	0.661	5.93317e-22
Nucb2	5.98711e-26	0.324286	0.441	0.41	1.11803e-21
Neat1	1.54454e-25	0.336188	0.637	0.593	2.88428e-21
Igsf10	2.38045e-25	0.341061	0.361	0.314	4.44525e-21
Sptbn1	7.51474e-25	0.248569	0.804	0.814	1.4033e-20
Lmo2	1.37246e-24	0.310632	0.267	0.209	2.56293e-20
Fkbp7	1.57913e-24	0.28202	0.615	0.578	2.94887e-20
Ms4a4d	1.84746e-24	0.290074	0.498	0.452	3.44995e-20
Scpep1	2.62888e-24	0.285391	0.464	0.433	4.90918e-20
Smpdl3a	2.38716e-23	0.256902	0.399	0.346	4.45779e-19
Selenok	4.8013e-23	0.268811	0.792	0.763	8.96596e-19
Ndufa4l2	8.46529e-23	0.353202	0.348	0.291	1.58081e-18
Aldh1a1	1.00352e-22	0.312743	0.268	0.213	1.87397e-18
Tmem119	1.11454e-22	0.293567	0.361	0.307	2.08129e-18
Atp6ap2	1.21653e-22	0.274672	0.344	0.298	2.27175e-18
Id2	1.583e-22	0.336289	0.399	0.348	2.9561e-18
Arap1	4.01054e-22	0.33373	0.231	0.177	7.48928e-18
Irf2bpl	7.64344e-22	0.267372	0.323	0.268	1.42734e-17
Emc10	1.51668e-21	0.231763	0.53	0.51	2.83225e-17
Cxcl13	4.45198e-21	0.23443	0.186	0.273	8.31363e-17
Casc4	7.90696e-21	0.247929	0.246	0.191	1.47654e-16
Mcl1	8.51529e-21	0.263353	0.561	0.54	1.59014e-16
Atf3	9.79132e-21	0.288903	0.451	0.391	1.82843e-16
Rab3d	2.35908e-20	0.226199	0.202	0.149	4.40534e-16
Hexa	3.7496e-20	0.216854	0.617	0.589	7.002e-16
Nr1d2	1.21445e-19	0.206809	0.238	0.181	2.26786e-15
Slc29a1	2.20452e-19	0.283333	0.496	0.48	4.11672e-15
Gpx8	2.98247e-18	0.277807	0.649	0.616	5.56946e-14
Mfap2	4.34904e-18	0.269434	0.467	0.436	8.1214e-14
4930523C07Rik	5.30815e-18	0.268252	0.368	0.33	9.91244e-14
Zfp36l2	5.82866e-18	0.265724	0.533	0.514	1.08844e-13
Hsd11b1	9.48203e-18	0.390067	0.332	0.276	1.77067e-13
P3h3	9.71388e-18	0.265014	0.459	0.444	1.81397e-13
Abca8b	2.82323e-17	0.234131	0.204	0.153	5.2721e-13
Gadd45b	1.02103e-16	0.301486	0.397	0.361	1.90668e-12
Ddx3x	1.24806e-16	0.208654	0.611	0.605	2.33062e-12
Os9	1.65541e-16	0.238082	0.465	0.451	3.09131e-12
Frmd6	2.66595e-16	0.253821	0.438	0.413	4.9784e-12
Copz2	3.05035e-16	0.304079	0.546	0.525	5.69622e-12
Lrp6	5.22318e-16	0.244573	0.388	0.362	9.75377e-12
Itm2a	5.93419e-16	0.447826	0.421	0.405	1.10815e-11
Rab34	6.26147e-16	0.293325	0.389	0.37	1.16927e-11
Tmeff2	8.0802e-16	0.298565	0.471	0.465	1.5089e-11
Adamts2	3.39397e-15	0.242853	0.605	0.624	6.33789e-11
Bhlhe40	4.79923e-15	0.25407	0.255	0.214	8.96209e-11
Emp2	7.43692e-15	0.279601	0.28	0.249	1.38877e-10
Ctsk	4.06546e-14	0.314037	0.523	0.526	7.59183e-10
Chpt1	6.8381e-14	0.201187	0.297	0.26	1.27695e-09
Pros1	2.1049e-13	0.249438	0.44	0.432	3.93069e-09
Fbln5	3.93972e-13	0.28819	0.507	0.499	7.35703e-09
Tecr	3.95612e-13	0.231458	0.52	0.508	7.38766e-09
Rbp4	4.05498e-13	0.36102	0.284	0.244	7.57227e-09
Hcfc1r1	4.24877e-13	0.234484	0.539	0.53	7.93415e-09
Rbms3	5.33154e-13	0.204259	0.419	0.396	9.95611e-09
Zfp703	7.72286e-13	0.210039	0.208	0.17	1.44217e-08
Zmiz1	1.02333e-12	0.223131	0.297	0.263	1.91097e-08
Pnp	1.48459e-12	0.254198	0.58	0.588	2.77233e-08
Ginm1	1.95661e-12	0.254587	0.411	0.405	3.65377e-08
Nab1	2.31033e-12	0.293143	0.24	0.211	4.31432e-08
Ppp1r2	3.25838e-12	0.210293	0.531	0.517	6.08469e-08
Ssbp2	4.13751e-12	0.253629	0.318	0.295	7.72638e-08
Klf7	7.32001e-12	0.244729	0.388	0.375	1.36694e-07
Matn2	2.35325e-10	0.262933	0.223	0.189	4.39445e-06
Slc50a1	3.2871e-10	0.214932	0.491	0.48	6.13833e-06
Adk	4.51622e-10	0.249468	0.288	0.267	8.43358e-06
Col16a1	4.98825e-10	0.217645	0.227	0.196	9.31505e-06
Lysmd2	6.73195e-10	0.261572	0.447	0.452	1.25712e-05
Dab2	1.15709e-08	0.209676	0.269	0.246	0.000216075
Hspa1a	1.31616e-08	0.219535	0.253	0.213	0.00024578
Sri	1.75145e-08	0.21745	0.637	0.651	0.000327066
Nop53	4.25227e-08	0.216402	0.47	0.474	0.000794068
Por	5.8287e-08	0.231008	0.382	0.379	0.00108845
Adamts1	6.47276e-08	0.207559	0.494	0.49	0.00120872
Pam	8.92924e-08	0.213521	0.456	0.432	0.00166745
Cdk2ap2	1.29155e-07	0.260075	0.426	0.426	0.00241184
Ank2	1.59821e-07	0.222575	0.245	0.227	0.0029845
Akap12	5.38032e-07	0.2488	0.432	0.431	0.0100472
Trim47	1.21722e-06	0.273963	0.344	0.34	0.0227304
Ddrgk1	1.41386e-06	0.210683	0.431	0.445	0.0264024
Pink1	2.02578e-06	0.209393	0.358	0.356	0.0378294
Mcrip1	2.74432e-06	0.210097	0.516	0.536	0.0512474
Mmp23	2.78765e-06	0.277047	0.512	0.541	0.0520566
Rnd3	2.9779e-06	0.201124	0.286	0.272	0.0556094
Gaa	5.4238e-06	0.225321	0.392	0.401	0.101284
Cetn3	8.30583e-06	0.256162	0.444	0.461	0.155103
Ctsa	4.96248e-05	0.220241	0.342	0.35	0.926694
Ccdc80	5.35833e-05	0.234997	0.635	0.678	1
Gstm5	8.29736e-05	0.205934	0.4	0.415	1
Dact1	0.00025941	0.2003	0.27	0.254	1
Gnptg	0.000417533	0.209209	0.22	0.214	1
Tmem205	0.000468025	0.227453	0.305	0.314	1
Zfyve21	0.000484217	0.208847	0.308	0.313	1
Scarf2	0.000518992	0.208379	0.225	0.221	1
Gja1	0.000583518	0.253921	0.296	0.296	1
Phlda3	0.000645163	0.338773	0.314	0.324	1
Lox	0.000647489	0.371953	0.265	0.271	1
Bmyc	0.00104173	0.248592	0.242	0.241	1
Prrx2	0.00180438	0.21093	0.23	0.228	1
Fam198b	0.00222648	0.209805	0.277	0.279	1
Gpx3	0.00298005	0.547644	0.615	0.686	1
Tmem45a	0.00694139	0.215459	0.269	0.277	1
Mgst3	0.0181411	0.222664	0.225	0.23	1
Sned1	0.0329107	0.239953	0.276	0.288	1
Pttg1	0.101572	0.24957	0.311	0.336	1

## Sheet: ProlifDiff
	p_val	avg_logFC	pct.1	pct.2	p_val_adj
Stmn1	0	2.32924	0.969	0.098	0
H2afz	0	2.32567	0.992	0.433	0
Hmgb2	0	2.08004	0.91	0.184	0
Cks2	0	2.02095	0.931	0.117	0
Cenpa	0	1.87336	0.75	0.052	0
Pclaf	0	1.84894	0.886	0.043	0
Birc5	0	1.80623	0.923	0.048	0
Ube2c	0	1.79066	0.685	0.028	0
Top2a	0	1.7512	0.707	0.022	0
Cenpf	0	1.6591	0.715	0.014	0
Smc4	0	1.56434	0.915	0.168	0
Mki67	0	1.54614	0.793	0.018	0
Selenoh	0	1.52345	0.941	0.249	0
Prc1	0	1.49364	0.631	0.014	0
Cdc20	0	1.44943	0.664	0.026	0
Ccnb2	0	1.40806	0.71	0.041	0
Cdca3	0	1.37291	0.775	0.029	0
Cdk1	0	1.36539	0.699	0.037	0
Smc2	0	1.3422	0.821	0.085	0
Cdca8	0	1.31054	0.793	0.022	0
Tpx2	0	1.26615	0.752	0.017	0
Lockd	0	1.21798	0.745	0.043	0
Tk1	0	1.18427	0.73	0.033	0
Hmgn2	0	1.1786	0.844	0.191	0
Cenpe	0	1.17098	0.616	0.012	0
H2afx	0	1.16014	0.738	0.122	0
Hmmr	0	1.15726	0.634	0.008	0
Ccna2	0	1.15188	0.687	0.011	0
Knstrn	0	1.06956	0.674	0.024	0
Spc24	0	1.06494	0.75	0.033	0
Ccnb1	0	1.04639	0.495	0.011	0
Cdkn3	0	1.03291	0.608	0.022	0
Tmpo	0	1.03114	0.856	0.219	0
Mxd3	0	1.01493	0.603	0.01	0
Spc25	0	0.966925	0.557	0.014	0
Pimreg	0	0.964554	0.577	0.008	0
Cenpm	0	0.96042	0.711	0.034	0
Rrm2	0	0.958594	0.602	0.027	0
Racgap1	0	0.947175	0.634	0.016	0
Tyms	0	0.942627	0.718	0.096	0
Pbk	0	0.937926	0.537	0.008	0
Lmnb1	0	0.928369	0.727	0.073	0
Cenpw	0	0.88066	0.691	0.044	0
Ckap2l	0	0.832665	0.535	0.007	0
Cdkn2c	0	0.81235	0.554	0.077	0
Tacc3	0	0.800132	0.611	0.024	0
Anln	0	0.794715	0.569	0.018	0
Dnajc9	0	0.79112	0.684	0.107	0
Ckap2	0	0.789035	0.517	0.011	0
Nusap1	0	0.775374	0.41	0.011	0
Gmnn	0	0.772499	0.571	0.033	0
Pmf1	0	0.768192	0.676	0.053	0
Kif20b	0	0.755046	0.452	0.008	0
Kif23	0	0.744692	0.443	0.006	0
Aurkb	0	0.731519	0.448	0.011	0
Nuf2	0	0.724244	0.531	0.008	0
Rrm1	0	0.721934	0.636	0.09	0
Lig1	0	0.720553	0.502	0.057	0
Plk1	0	0.717293	0.46	0.008	0
Knl1	0	0.709234	0.44	0.004	0
Kif22	0	0.70167	0.448	0.009	0
Mad2l1	0	0.701238	0.588	0.026	0
Slfn9	0	0.680968	0.525	0.063	0
Kif20a	0	0.677055	0.454	0.011	0
Esco2	0	0.669879	0.394	0.005	0
Cenpq	0	0.667113	0.502	0.022	0
Rangap1	0	0.666252	0.623	0.092	0
Aurka	0	0.657979	0.386	0.008	0
Incenp	0	0.649133	0.469	0.021	0
Aspm	0	0.644236	0.384	0.005	0
Kif11	0	0.642485	0.412	0.004	0
Mis18bp1	0	0.641165	0.389	0.005	0
Sgo2a	0	0.639078	0.42	0.007	0
Asf1b	0	0.632146	0.449	0.012	0
Tcf19	0	0.620729	0.443	0.037	0
Diaph3	0	0.601807	0.477	0.013	0
C330027C09Rik	0	0.597368	0.441	0.012	0
Gins2	0	0.578046	0.52	0.05	0
Anapc15	0	0.543612	0.557	0.078	0
Mcm5	0	0.540633	0.423	0.03	0
Rad51ap1	0	0.535087	0.4	0.007	0
Plk4	0	0.531378	0.463	0.033	0
Uhrf1	0	0.529346	0.432	0.02	0
Hmgb3	0	0.524186	0.5	0.052	0
Depdc1a	0	0.522243	0.375	0.004	0
Ska1	0	0.510613	0.355	0.004	0
Kif2c	0	0.508291	0.34	0.004	0
Shcbp1	0	0.505411	0.366	0.007	0
Dbf4	0	0.501713	0.417	0.018	0
Hells	0	0.500054	0.38	0.025	0
Rfc5	0	0.498246	0.539	0.058	0
Clspn	0	0.497216	0.389	0.018	0
Ncapg2	0	0.497177	0.435	0.026	0
Cit	0	0.494986	0.403	0.009	0
Bub1b	0	0.479848	0.367	0.007	0
Mis18a	0	0.473917	0.451	0.049	0
Hist1h4i	0	0.466339	0.435	0.034	0
Cenph	0	0.46404	0.398	0.009	0
Dlgap5	0	0.460418	0.316	0.003	0
Ncapd2	0	0.458297	0.403	0.019	0
4930579G24Rik	0	0.454056	0.377	0.026	0
Cep55	0	0.452627	0.346	0.004	0
Cenpn	0	0.451739	0.397	0.01	0
Ect2	0	0.450202	0.327	0.007	0
Kif4	0	0.447899	0.298	0.003	0
Ncapg	0	0.443141	0.35	0.005	0
Ndc80	0	0.438617	0.295	0.005	0
Bub1	0	0.43398	0.333	0.003	0
Ndc1	0	0.431272	0.414	0.034	0
Fen1	0	0.430482	0.406	0.033	0
Cenpk	0	0.429232	0.358	0.016	0
Rad51	0	0.425233	0.343	0.008	0
Ube2t	0	0.423162	0.289	0.007	0
Fbxo5	0	0.422108	0.285	0.014	0
Cdca2	0	0.419768	0.307	0.005	0
Arhgap11a	0	0.412076	0.323	0.008	0
Cenpp	0	0.411025	0.333	0.01	0
Sgo1	0	0.410973	0.301	0.006	0
Gas2l3	0	0.39914	0.23	0.004	0
Syce2	0	0.397589	0.366	0.029	0
Trip13	0	0.395552	0.353	0.015	0
Trim59	0	0.385624	0.306	0.013	0
Cenps	0	0.37988	0.321	0.017	0
Kif15	0	0.372281	0.279	0.004	0
Neil3	0	0.37089	0.261	0.003	0
Foxm1	0	0.365347	0.312	0.007	0
Melk	0	0.361335	0.299	0.004	0
Spdl1	0	0.35928	0.276	0.003	0
Nek2	0	0.354911	0.245	0.002	0
Ncaph	0	0.337379	0.256	0.004	0
Chaf1a	0	0.334265	0.299	0.02	0
Prr11	0	0.332831	0.248	0.004	0
Spag5	0	0.326419	0.264	0.003	0
Cdca5	0	0.315621	0.25	0.003	0
Cdc25c	0	0.310679	0.258	0.003	0
Mns1	0	0.309587	0.215	0.007	0
Kifc1	0	0.29854	0.221	0.004	0
Mms22l	0	0.286307	0.255	0.012	0
Zwilch	0	0.285994	0.244	0.006	0
Iqgap3	0	0.280382	0.207	0.002	0
Rad54l	0	0.248757	0.219	0.006	0
Lrr1	0	0.243893	0.227	0.004	0
Mybl2	0	0.228204	0.208	0.004	0
Ube2s	2.37995e-306	1.63033	0.963	0.488	4.44431e-302
Ran	1.63286e-303	1.38127	0.968	0.499	3.0492e-299
Ccne2	1.3696e-300	0.283295	0.202	0.008	2.5576e-296
Nt5dc2	8.21319e-289	0.525531	0.577	0.097	1.53373e-284
Cmc2	1.12881e-286	0.620147	0.701	0.144	2.10793e-282
Cks1b	1.66419e-284	1.10542	0.914	0.358	3.10772e-280
Ccdc34	3.83624e-284	0.934497	0.872	0.248	7.1638e-280
Haus4	9.99442e-281	0.411962	0.414	0.048	1.86636e-276
Lsm2	1.31946e-279	0.823756	0.846	0.243	2.46396e-275
Chaf1b	1.35573e-273	0.310007	0.23	0.013	2.53169e-269
Ezh2	3.92709e-272	0.548938	0.485	0.071	7.33345e-268
Dtl	2.43128e-271	0.302985	0.233	0.014	4.54016e-267
Lmnb2	1.29845e-266	0.327334	0.284	0.023	2.42473e-262
Lsm5	5.15228e-266	0.855283	0.856	0.268	9.62136e-262
Pkmyt1	2.33172e-265	0.321168	0.319	0.03	4.35425e-261
Psrc1	3.75724e-259	0.307368	0.218	0.012	7.01627e-255
Tuba1b	5.87448e-258	1.43153	0.949	0.525	1.097e-253
Bora	1.1628e-257	0.349213	0.265	0.02	2.17141e-253
Mcm3	1.34977e-257	0.479435	0.407	0.052	2.52055e-253
Rfc4	5.30427e-257	0.419902	0.44	0.061	9.9052e-253
Nrm	6.06553e-257	0.405378	0.392	0.048	1.13268e-252
Hmgb1	4.07356e-256	1.151	0.972	0.536	7.60697e-252
Ppih	5.03051e-255	0.381137	0.512	0.082	9.39397e-251
Ptma	6.5055e-251	1.12429	0.989	0.789	1.21484e-246
Ska2	7.59363e-250	0.349608	0.361	0.041	1.41803e-245
Prim1	3.40504e-248	0.290125	0.33	0.034	6.35856e-244
Rpa2	2.24236e-246	0.456481	0.48	0.075	4.18738e-242
Anp32b	1.62467e-244	1.13379	0.949	0.527	3.0339e-240
Tubb5	2.72812e-244	1.62129	0.92	0.508	5.0945e-240
Gemin6	5.87713e-243	0.363706	0.475	0.074	1.0975e-238
Dut	8.24503e-241	0.818113	0.736	0.197	1.53968e-236
H2-Q7	8.62867e-240	0.907688	0.745	0.198	1.61132e-235
Psat1	9.88581e-240	0.441055	0.528	0.093	1.84608e-235
Itgb3bp	1.79245e-239	0.483698	0.596	0.118	3.34723e-235
Dctpp1	2.02112e-231	0.659582	0.713	0.186	3.77424e-227
Hirip3	4.38907e-230	0.38606	0.429	0.063	8.19615e-226
Dhfr	4.92154e-230	0.386803	0.397	0.055	9.19049e-226
Gm42031	2.43673e-228	0.430583	0.235	0.018	4.55034e-224
Ppia	1.381e-226	1.0559	0.983	0.811	2.57888e-222
Atad2	8.61776e-225	0.563032	0.494	0.087	1.60928e-220
Alyref	2.84063e-221	0.750085	0.832	0.278	5.30459e-217
Ranbp1	4.4165e-221	1.0778	0.932	0.499	8.24738e-217
Jpt2	2.16113e-218	0.427876	0.491	0.089	4.03569e-214
Nucks1	2.22943e-218	0.996189	0.949	0.485	4.16324e-214
H2-Q6	3.57969e-218	0.551962	0.481	0.087	6.68472e-214
Rpa3	4.52948e-218	0.553773	0.742	0.197	8.45836e-214
Rfc2	4.25833e-217	0.567628	0.654	0.159	7.952e-213
Tnc	5.0752e-217	0.998968	0.546	0.115	9.47743e-213
Rcc1	8.57697e-216	0.28841	0.353	0.046	1.60166e-211
Haus8	4.23928e-215	0.332218	0.373	0.052	7.91643e-211
Rad18	1.83372e-210	0.266813	0.289	0.031	3.42429e-206
Ppil1	3.3054e-207	0.416265	0.566	0.12	6.17251e-203
Usp1	3.74e-207	0.573117	0.685	0.174	6.98408e-203
Anp32e	1.4832e-206	0.634906	0.779	0.225	2.76974e-202
Ncaph2	3.86186e-206	0.481354	0.688	0.171	7.21163e-202
Mcm7	9.97623e-206	0.420154	0.41	0.065	1.86296e-201
H2afv	1.96969e-204	1.18876	0.938	0.518	3.6782e-200
Cenpl	2.38231e-204	0.228177	0.218	0.017	4.44873e-200
Tagln2	6.70655e-204	1.09214	0.912	0.466	1.25238e-199
Sdc1	1.2727e-203	0.566775	0.619	0.148	2.37664e-199
Cdkn2d	1.68369e-202	0.878555	0.593	0.145	3.14412e-198
Ctsc	3.60332e-202	0.614601	0.699	0.186	6.72884e-198
Zfp367	9.7938e-201	0.315035	0.247	0.023	1.82889e-196
Tubb6	1.45759e-196	1.07893	0.907	0.448	2.7219e-192
Psmc3ip	1.97656e-195	0.253916	0.261	0.027	3.69103e-191
Dek	1.60296e-194	0.887816	0.921	0.411	2.99336e-190
Acot7	2.10873e-194	0.475417	0.62	0.151	3.93785e-190
Lsm3	6.51329e-194	0.609968	0.816	0.269	1.21629e-189
Lgals1	1.23051e-191	1.09226	0.954	0.773	2.29785e-187
Hat1	1.28674e-191	0.391379	0.485	0.095	2.40285e-187
Ncapd3	6.82641e-191	0.377405	0.332	0.046	1.27476e-186
Rad21	1.38295e-190	0.691557	0.755	0.227	2.58253e-186
Dtymk	2.67737e-190	0.681545	0.816	0.297	4.99973e-186
Mcm2	1.26296e-187	0.291895	0.281	0.034	2.35845e-183
Timp1	1.15562e-183	1.39084	0.719	0.254	2.158e-179
Nxt1	1.55427e-182	0.484394	0.585	0.142	2.90244e-178
Tex30	1.25158e-181	0.281764	0.369	0.059	2.33719e-177
Ccne1	1.60178e-180	0.237147	0.207	0.018	2.99117e-176
Ddx39	4.35001e-180	0.466473	0.588	0.143	8.1232e-176
Slc25a10	1.59813e-179	0.263571	0.367	0.059	2.98436e-175
Aaas	2.26405e-178	0.247678	0.252	0.028	4.22789e-174
Rbbp8	6.52926e-177	0.304553	0.369	0.06	1.21927e-172
Reep4	3.46893e-176	0.444477	0.401	0.072	6.47789e-172
Pfn1	4.45389e-176	0.897369	0.966	0.68	8.3172e-172
Snrpd1	1.88264e-175	0.737282	0.849	0.355	3.51564e-171
Ckap4	6.96687e-175	0.895595	0.898	0.518	1.30099e-170
2022-09-09	1.1648e-174	0.429843	0.585	0.146	2.17515e-170
Pole3	6.4637e-174	0.464386	0.735	0.221	1.20703e-169
Lbr	2.99316e-173	0.343149	0.4	0.07	5.58943e-169
Hdgf	4.60691e-173	0.847725	0.932	0.481	8.60294e-169
Adam12	1.952e-171	0.412993	0.591	0.15	3.64517e-167
Mthfd2	4.81028e-171	0.42442	0.446	0.09	8.98271e-167
Nasp	5.89998e-171	0.448464	0.677	0.189	1.10176e-166
Ass1	7.48355e-170	0.577965	0.491	0.11	1.39748e-165
Rfc3	7.93643e-169	0.284673	0.316	0.047	1.48205e-164
Topbp1	5.06626e-168	0.360715	0.41	0.077	9.46073e-164
Mis12	1.49877e-167	0.242115	0.35	0.056	2.7988e-163
Rnf26	1.06385e-166	0.369994	0.502	0.112	1.98663e-162
Nde1	5.61366e-166	0.363188	0.502	0.111	1.04829e-161
Pcna	1.9982e-163	0.419094	0.441	0.092	3.73144e-159
Ripk3	3.89224e-163	0.315576	0.441	0.091	7.26837e-159
Cdt1	8.5666e-163	0.239644	0.221	0.024	1.59973e-158
Mcm6	2.33949e-162	0.45827	0.415	0.083	4.36876e-158
Snrpf	2.3251e-161	0.728068	0.903	0.449	4.3419e-157
Cox7a2	5.59549e-161	0.78893	0.931	0.551	1.0449e-156
Tubg1	1.06579e-160	0.28262	0.4	0.075	1.99025e-156
Tuba1c	1.4362e-160	0.439242	0.386	0.073	2.68196e-156
Sh3bgrl3	1.44903e-160	0.936105	0.914	0.517	2.70592e-156
Nup37	2.41047e-160	0.311763	0.383	0.071	4.50131e-156
Nap1l1	1.64339e-159	0.789446	0.927	0.549	3.06887e-155
Nsd2	2.2445e-158	0.36847	0.452	0.096	4.19138e-154
Larp7	1.18715e-157	0.327964	0.543	0.132	2.21688e-153
Limd2	1.13712e-156	0.392365	0.56	0.145	2.12346e-152
Ssrp1	2.49979e-156	0.624156	0.838	0.336	4.66811e-152
Cdca4	1.07654e-155	0.289178	0.381	0.071	2.01033e-151
Snrpe	3.38929e-155	0.736222	0.907	0.499	6.32916e-151
Vrk1	2.22579e-154	0.304866	0.318	0.051	4.15645e-150
Lsm6	2.74972e-154	0.61523	0.86	0.364	5.13483e-150
Nudt21	4.19556e-154	0.529129	0.83	0.316	7.8348e-150
S1pr3	9.2032e-154	0.42806	0.509	0.124	1.71861e-149
Rpa1	9.31179e-154	0.332124	0.407	0.081	1.73888e-149
Tpm4	2.80199e-153	0.809541	0.948	0.594	5.23243e-149
Tinf2	3.61916e-152	0.222095	0.247	0.031	6.75843e-148
Dynlt1f	7.94118e-151	0.340551	0.517	0.126	1.48294e-146
Exosc8	1.27061e-150	0.400925	0.62	0.173	2.37274e-146
Tipin	2.85782e-150	0.501248	0.664	0.204	5.33669e-146
Fam111a	1.51255e-149	0.457216	0.657	0.198	2.82454e-145
Hnrnpa1	4.43069e-149	0.732331	0.898	0.469	8.27387e-145
Hnrnpab	1.01127e-148	0.67721	0.912	0.468	1.88844e-144
Stac2	5.20582e-146	0.226165	0.221	0.027	9.72134e-142
Cfl1	1.26943e-144	0.734232	0.96	0.701	2.37054e-140
Banf1	6.82303e-144	0.565597	0.852	0.354	1.27413e-139
Notch3	7.3652e-144	0.307053	0.415	0.09	1.37538e-139
Lsm8	4.4451e-143	0.45828	0.727	0.246	8.30079e-139
Ubald2	1.16556e-142	0.558026	0.69	0.237	2.17656e-138
Neurl1b	7.70598e-141	0.272352	0.202	0.023	1.43901e-136
Snrnp25	1.00825e-140	0.311694	0.441	0.099	1.88281e-136
Brip1os	9.12753e-140	0.337466	0.565	0.151	1.70448e-135
H1fx	1.19602e-139	0.410075	0.392	0.082	2.23345e-135
Cse1l	1.61228e-139	0.231726	0.367	0.072	3.01078e-135
Nubp1	2.6585e-139	0.29387	0.506	0.127	4.96448e-135
Tfdp1	3.30912e-139	0.303758	0.506	0.128	6.17945e-135
Mrpl18	5.40281e-139	0.688693	0.87	0.421	1.00892e-134
Ak6	6.22397e-139	0.362858	0.611	0.177	1.16226e-134
Erh	7.46514e-139	0.342051	0.633	0.189	1.39404e-134
Gins4	8.31307e-139	0.318253	0.503	0.125	1.55238e-134
Lyar	5.89123e-138	0.445265	0.715	0.239	1.10013e-133
Bok	2.49486e-137	0.458591	0.426	0.096	4.65891e-133
Hint1	1.61858e-136	0.680197	0.955	0.711	3.02253e-132
Lsm4	1.77314e-136	0.584902	0.886	0.43	3.31117e-132
Plp2	1.40825e-135	0.446579	0.724	0.252	2.62976e-131
Pold2	1.71254e-135	0.315784	0.463	0.111	3.198e-131
Hjurp	1.89838e-135	0.537429	0.596	0.176	3.54503e-131
Miip	2.96212e-135	0.251426	0.25	0.036	5.53146e-131
Dnmt1	2.98609e-135	0.33542	0.377	0.078	5.57623e-131
Ccdc77	4.14558e-135	0.212224	0.235	0.032	7.74145e-131
Psip1	4.32508e-135	0.586567	0.841	0.357	8.07666e-131
Set	1.20487e-134	0.686734	0.889	0.496	2.24997e-130
Cycs	1.76948e-134	0.476329	0.758	0.289	3.30433e-130
Ccl2	1.01692e-133	1.20627	0.545	0.169	1.899e-129
Ywhah	1.10224e-133	0.654308	0.881	0.422	2.05833e-129
Fxn	1.83645e-132	0.297403	0.412	0.093	3.42938e-128
Mcm4	4.64507e-132	0.327941	0.336	0.065	8.6742e-128
Nme1	5.75762e-132	0.714296	0.85	0.43	1.07518e-127
Hpf1	5.83742e-132	0.425551	0.674	0.223	1.09008e-127
Orc6	5.5267e-131	0.384234	0.551	0.156	1.03206e-126
2610524H06Rik	1.78891e-130	0.326027	0.54	0.152	3.34061e-126
Cenpt	2.17945e-130	0.200014	0.235	0.033	4.06991e-126
Sae1	2.76226e-130	0.44441	0.741	0.264	5.15824e-126
Srsf1	8.08135e-130	0.349006	0.741	0.254	1.50911e-125
Eri1	9.81525e-129	0.26936	0.421	0.097	1.8329e-124
Lhfpl2	1.27644e-128	0.344486	0.426	0.101	2.38363e-124
Vars	1.51604e-128	0.3007	0.5	0.131	2.83106e-124
Slc25a5	2.57067e-128	0.830493	0.823	0.417	4.80046e-124
Ucp2	3.63964e-128	0.296879	0.289	0.051	6.79667e-124
Haus1	3.70651e-128	0.222043	0.326	0.062	6.92154e-124
Rbmx2	4.37449e-128	0.216476	0.324	0.061	8.16893e-124
Rnaseh2b	1.10762e-127	0.269921	0.446	0.108	2.06838e-123
Cdc25b	1.27512e-127	0.291193	0.273	0.045	2.38116e-123
Med30	1.38709e-127	0.366885	0.647	0.206	2.59024e-123
Actn1	3.6031e-127	0.319789	0.448	0.112	6.72843e-123
Atp5g2	3.21661e-126	0.688281	0.915	0.567	6.0067e-122
Cinp	3.89101e-126	0.272512	0.506	0.134	7.26607e-122
Ckap5	4.41809e-126	0.346709	0.492	0.126	8.25035e-122
Lrrc59	9.28684e-126	0.554994	0.796	0.336	1.73423e-121
Sox11	1.20251e-125	0.300639	0.313	0.06	2.24556e-121
Cdk4	5.05202e-125	0.638333	0.869	0.439	9.43414e-121
Nup35	5.17133e-124	0.261234	0.319	0.061	9.65695e-120
Ssna1	1.25215e-123	0.447506	0.83	0.337	2.33827e-119
Ubl4a	1.47794e-123	0.385719	0.747	0.27	2.7599e-119
Terf1	1.52685e-123	0.292004	0.415	0.097	2.85124e-119
Lin54	1.67493e-123	0.211324	0.236	0.035	3.12776e-119
Mrpl51	3.35046e-123	0.529923	0.866	0.397	6.25665e-119
Cxcl9	5.39825e-123	0.708065	0.59	0.194	1.00807e-118
Ubd	1.44916e-122	0.329461	0.285	0.052	2.70616e-118
Pradc1	2.4964e-122	0.255847	0.377	0.082	4.66177e-118
Nelfe	1.93899e-121	0.304393	0.52	0.145	3.62087e-117
Pih1d1	2.30304e-121	0.335252	0.656	0.212	4.3007e-117
Uchl5	3.32871e-120	0.261153	0.451	0.114	6.21603e-116
Med9	6.01787e-120	0.2577	0.526	0.148	1.12378e-115
Timm8a1	6.93663e-120	0.263865	0.543	0.159	1.29535e-115
Nsmce1	4.32455e-119	0.387191	0.724	0.259	8.07566e-115
Nudt5	1.17541e-118	0.283157	0.509	0.144	2.19496e-114
Pbdc1	1.01665e-117	0.465755	0.758	0.3	1.8985e-113
Txndc12	2.31552e-117	0.339628	0.65	0.216	4.32401e-113
Pgp	3.68083e-117	0.390346	0.721	0.264	6.87359e-113
Snrpa1	2.51864e-116	0.374159	0.67	0.23	4.70331e-112
Notch1	1.24574e-115	0.246662	0.38	0.089	2.32629e-111
Fam96a	3.37478e-115	0.331448	0.687	0.238	6.30206e-111
Cbx1	3.55129e-115	0.457688	0.853	0.373	6.63167e-111
Hspa14	4.40353e-115	0.227961	0.528	0.149	8.22316e-111
Fzr1	5.46674e-115	0.354748	0.418	0.107	1.02086e-110
Bex3	5.88798e-115	0.379383	0.693	0.249	1.09952e-110
Lmf2	1.57761e-114	0.332525	0.56	0.171	2.94602e-110
Traf4	2.43621e-114	0.292064	0.506	0.145	4.54937e-110
Uhrf2	3.82378e-114	0.527241	0.744	0.289	7.14053e-110
Snrpg	5.4306e-114	0.304216	0.696	0.25	1.01411e-109
Fscn1	7.50643e-114	0.494325	0.752	0.295	1.40175e-109
Rnaseh2c	7.6842e-114	0.413313	0.784	0.314	1.43495e-109
Ybx1	3.19015e-113	0.576991	0.969	0.815	5.95729e-109
Tubb3	3.79408e-113	0.361312	0.208	0.031	7.08506e-109
P3h2	5.83601e-113	0.214766	0.269	0.05	1.08982e-108
Dnajc15	1.26913e-112	0.295846	0.631	0.207	2.36998e-108
Anapc11	1.36579e-112	0.560305	0.877	0.477	2.55047e-108
Tmem183a	5.11793e-112	0.260745	0.526	0.154	9.55722e-108
Lypd1	6.71489e-112	0.508363	0.446	0.124	1.25394e-107
Lmna	2.10993e-111	0.798537	0.883	0.548	3.94009e-107
Rpl41	3.58901e-111	0.780115	0.924	0.821	6.70213e-107
Sac3d1	3.83959e-111	0.252942	0.437	0.115	7.17005e-107
Tcof1	9.20969e-111	0.251386	0.446	0.118	1.71982e-106
Ipo9	9.51225e-111	0.225986	0.417	0.105	1.77632e-106
Rgs10	9.58406e-111	0.316559	0.674	0.236	1.78973e-106
Kpnb1	1.39929e-110	0.35436	0.773	0.296	2.61303e-106
Raly	1.71153e-110	0.519956	0.843	0.394	3.1961e-106
Naa50	2.04459e-110	0.482015	0.806	0.362	3.81807e-106
Cdk2	5.6874e-110	0.208528	0.284	0.055	1.06206e-105
Trabd2b	1.64752e-109	0.312081	0.497	0.145	3.07659e-105
Pfkl	2.15928e-109	0.269339	0.423	0.111	4.03224e-105
Cisd2	2.54949e-109	0.42534	0.836	0.371	4.76092e-105
Nans	3.32265e-109	0.332544	0.696	0.251	6.20472e-105
Idh2	7.25849e-109	0.503615	0.741	0.313	1.35545e-104
Tmem138	1.196e-108	0.239728	0.38	0.092	2.23341e-104
Pdap1	1.29855e-108	0.504289	0.877	0.455	2.42492e-104
Prelid3b	1.67645e-108	0.279812	0.636	0.211	3.13061e-104
Metrn	1.69794e-108	0.230083	0.343	0.077	3.17073e-104
Cbfb	2.57396e-108	0.305606	0.608	0.198	4.80662e-104
Eloc	3.67795e-108	0.499745	0.869	0.448	6.8682e-104
Nhp2	4.27875e-108	0.480478	0.761	0.327	7.99015e-104
Sec61g	6.08701e-108	0.671621	0.906	0.602	1.13669e-103
Pgk1	1.32531e-107	0.591924	0.764	0.351	2.47488e-103
Bcat1	4.77702e-107	0.305959	0.458	0.13	8.92062e-103
Calm2	5.1192e-107	0.988303	0.914	0.643	9.5596e-103
Pole4	5.90161e-107	0.319952	0.694	0.255	1.10207e-102
Nes	6.25259e-107	0.218809	0.224	0.037	1.16761e-102
H2-Q4	8.1841e-107	0.330074	0.614	0.21	1.5283e-102
Hmgn5	9.967e-107	0.252436	0.451	0.121	1.86124e-102
Cxcl10	2.21366e-106	1.04912	0.417	0.119	4.13379e-102
Ppp4c	3.89217e-106	0.355433	0.776	0.303	7.26824e-102
Rbmx	1.18194e-105	0.22164	0.455	0.124	2.20715e-101
Ccl9	1.26871e-105	0.258093	0.222	0.037	2.36919e-101
Tceal9	1.47887e-105	0.671106	0.892	0.59	2.76164e-101
Stip1	8.26442e-105	0.252017	0.588	0.191	1.5433e-100
Emilin1	1.26163e-104	0.392184	0.733	0.286	2.35596e-100
Cep192	1.32391e-104	0.230569	0.301	0.063	2.47227e-100
Gapdh	1.35898e-104	0.601891	0.807	0.4	2.53776e-100
Taf12	2.94725e-104	0.247486	0.623	0.209	5.5037e-100
Tubb4b	4.86574e-104	0.888844	0.776	0.414	9.08629e-100
Adamts4	4.97141e-104	0.327331	0.443	0.125	9.28361e-100
Arpin	8.10844e-104	0.248211	0.394	0.099	1.51417e-99
Tardbp	2.77909e-103	0.288558	0.694	0.249	5.18968e-99
Mrpl42	3.04799e-103	0.496131	0.836	0.419	5.69182e-99
Phgdh	3.51682e-103	0.27485	0.514	0.157	6.5673e-99
Cdk2ap1	7.48855e-103	0.281343	0.465	0.135	1.39841e-98
Ccdc167	9.04646e-103	0.212236	0.409	0.108	1.68934e-98
Vps36	1.91528e-102	0.359256	0.755	0.299	3.5766e-98
Baz1a	2.59695e-102	0.27548	0.497	0.149	4.84955e-98
Rnps1	6.57574e-102	0.301649	0.63	0.218	1.22795e-97
Meox1	1.065e-101	0.329021	0.636	0.223	1.98879e-97
Eny2	1.21274e-101	0.4813	0.855	0.435	2.26468e-97
Bub3	1.52115e-101	0.531735	0.727	0.304	2.84059e-97
Snrnp40	1.52662e-101	0.242591	0.529	0.165	2.85081e-97
Cox8a	2.10748e-101	0.597697	0.932	0.702	3.93551e-97
Map2k3	2.16506e-101	0.316173	0.668	0.246	4.04302e-97
Hsp90aa1	4.43676e-101	0.651629	0.948	0.707	8.28521e-97
Prkar2b	6.16615e-101	0.275801	0.438	0.125	1.15147e-96
Ap1s1	1.26772e-100	0.317785	0.742	0.288	2.36734e-96
Gpaa1	2.81189e-100	0.212121	0.478	0.14	5.25093e-96
Bmper	4.45447e-100	0.351645	0.682	0.255	8.31828e-96
Fads3	5.51849e-100	0.242394	0.424	0.116	1.03052e-95
Siva1	5.85247e-100	0.53675	0.722	0.317	1.09289e-95
Srsf7	7.30607e-100	0.513128	0.765	0.361	1.36434e-95
Parp2	1.00939e-99	0.213361	0.406	0.107	1.88494e-95
Srpk1	3.04325e-99	0.305351	0.588	0.198	5.68297e-95
Yaf2	3.80856e-99	0.323412	0.599	0.209	7.11211e-95
Arpp19	1.0612e-98	0.466664	0.844	0.415	1.98168e-94
Tbx18	1.39371e-98	0.274896	0.457	0.133	2.60262e-94
Cox5a	3.01154e-98	0.540007	0.806	0.412	5.62375e-94
Car13	5.07545e-98	0.224907	0.394	0.104	9.4779e-94
Rbm17	1.14062e-97	0.337296	0.735	0.293	2.12999e-93
Noct	1.62846e-97	0.257356	0.309	0.071	3.04099e-93
Casp3	2.07868e-97	0.223867	0.364	0.092	3.88173e-93
Dazap1	2.33315e-97	0.332273	0.736	0.297	4.35693e-93
Cs	4.32022e-97	0.227526	0.654	0.232	8.06758e-93
Tgfb1	4.96388e-97	0.263335	0.403	0.111	9.26955e-93
Rcc2	7.5132e-97	0.240429	0.404	0.11	1.40301e-92
Ost4	7.65041e-96	0.599715	0.9	0.597	1.42864e-91
Uqcrq	2.22082e-95	0.516753	0.864	0.475	4.14716e-91
Hist1h1e	2.52388e-95	0.415574	0.293	0.066	4.7131e-91
Arl6ip1	4.04022e-95	1.15701	0.873	0.502	7.5447e-91
Nudcd2	4.10668e-95	0.330643	0.758	0.311	7.66882e-91
Psme3	4.2163e-95	0.235117	0.485	0.148	7.87352e-91
Hnrnpa2b1	5.5568e-95	0.553015	0.961	0.679	1.03768e-90
Npm3	7.32258e-95	0.349428	0.745	0.313	1.36742e-90
Prelid1	2.92541e-94	0.511254	0.87	0.493	5.46292e-90
Hikeshi	4.4021e-94	0.352872	0.781	0.332	8.22049e-90
Maz	5.78472e-94	0.274697	0.534	0.175	1.08024e-89
Eif5a	6.45786e-94	0.701665	0.877	0.64	1.20594e-89
Mmd	6.88718e-94	0.206436	0.324	0.078	1.28611e-89
Dnajc2	8.27752e-94	0.223801	0.577	0.194	1.54574e-89
Snhg6	9.49723e-94	0.279721	0.645	0.237	1.77351e-89
Rps27l	5.33371e-93	0.572321	0.907	0.612	9.96018e-89
Pkig	8.53213e-93	0.30726	0.684	0.269	1.59329e-88
G3bp1	9.11294e-93	0.418584	0.826	0.406	1.70175e-88
Cisd1	1.01729e-92	0.274456	0.713	0.276	1.89969e-88
2022-03-05	1.30873e-92	0.403368	0.762	0.33	2.44392e-88
Hmgn3	1.48045e-92	0.352514	0.713	0.29	2.76458e-88
Tmem176a	1.54217e-92	0.510448	0.685	0.285	2.87985e-88
Sf3b5	2.48232e-92	0.463557	0.867	0.477	4.63548e-88
Pin1	2.55865e-92	0.296122	0.761	0.311	4.77802e-88
Gtf2e2	3.96295e-92	0.243307	0.526	0.171	7.40042e-88
Snai1	4.04307e-92	0.27171	0.495	0.159	7.55003e-88
Rnf4	6.09231e-92	0.21499	0.645	0.23	1.13768e-87
Ube2i	7.09212e-92	0.441274	0.866	0.464	1.32438e-87
Timm17b	1.68417e-91	0.232865	0.707	0.266	3.14502e-87
Tmem176b	2.10711e-91	0.476152	0.755	0.325	3.93481e-87
Ptbp1	6.75841e-91	0.269929	0.693	0.27	1.26207e-86
Ldha	1.13783e-90	0.781563	0.807	0.498	2.12479e-86
Tusc5	3.53495e-90	0.226515	0.338	0.087	6.60116e-86
Col18a1	3.90082e-90	0.389441	0.685	0.272	7.28439e-86
Rab13	4.95024e-90	0.31253	0.685	0.266	9.24408e-86
E2f1	6.17744e-90	0.271321	0.292	0.068	1.15358e-85
Tmem167	9.31667e-90	0.491939	0.889	0.546	1.7398e-85
Cpsf2	9.34605e-90	0.231466	0.492	0.156	1.74528e-85
Apobec3	2.2993e-89	0.275052	0.389	0.11	4.29372e-85
Ndufa4	2.30298e-89	0.553486	0.907	0.649	4.30058e-85
Tmsb10	2.39692e-89	0.631482	0.935	0.832	4.47602e-85
Polr3k	2.59312e-89	0.224884	0.535	0.177	4.8424e-85
Oaz1	2.63071e-89	0.484678	0.968	0.839	4.91258e-85
Sf3b4	4.4226e-89	0.272304	0.58	0.204	8.25876e-85
Chtf8	1.12383e-88	0.201742	0.485	0.152	2.09863e-84
Lrrfip1	1.12385e-88	0.323165	0.478	0.153	2.09869e-84
Gng5	1.13459e-88	0.516527	0.946	0.749	2.11874e-84
Srprb	1.17778e-88	0.21365	0.511	0.165	2.19939e-84
Actl6a	1.92812e-88	0.245546	0.468	0.146	3.60057e-84
Cotl1	1.92829e-88	0.44245	0.704	0.298	3.60089e-84
Dpy30	2.3692e-88	0.202747	0.681	0.257	4.42424e-84
Coq7	4.22321e-88	0.233577	0.48	0.151	7.88642e-84
Rpp30	4.72771e-88	0.201648	0.409	0.118	8.82852e-84
Hprt	6.22103e-88	0.262158	0.657	0.253	1.16172e-83
Emc8	6.25522e-88	0.241989	0.628	0.231	1.1681e-83
Lfng	7.50302e-88	0.201093	0.248	0.053	1.40111e-83
Timm50	7.98346e-88	0.207914	0.534	0.178	1.49083e-83
Cox7c	9.35437e-88	0.522414	0.909	0.619	1.74684e-83
Emc6	9.52907e-88	0.245762	0.71	0.28	1.77946e-83
Vbp1	1.08692e-87	0.275657	0.605	0.219	2.02972e-83
Snx3	1.43103e-87	0.479227	0.892	0.54	2.6723e-83
Ak2	1.56757e-87	0.262526	0.671	0.262	2.92729e-83
U2af1	2.20631e-87	0.446805	0.829	0.426	4.12006e-83
Adam23	2.95761e-87	0.28443	0.593	0.214	5.52303e-83
Cthrc1	5.17905e-87	0.411447	0.472	0.156	9.67137e-83
Evl	1.15392e-86	0.209321	0.287	0.067	2.15483e-82
Bola3	1.38976e-86	0.334583	0.784	0.358	2.59523e-82
Eif2s1	3.15802e-86	0.302832	0.698	0.284	5.89728e-82
Pfdn6	3.4561e-86	0.302898	0.762	0.336	6.45393e-82
Tmem97	3.4827e-86	0.256458	0.483	0.159	6.5036e-82
G2e3	3.65934e-86	0.257466	0.278	0.063	6.83344e-82
Kmt5a	4.31232e-86	0.23672	0.525	0.174	8.05283e-82
Mrpl28	4.477e-86	0.292821	0.739	0.307	8.36036e-82
Metap2	5.70958e-86	0.408155	0.855	0.445	1.06621e-81
Slirp	9.25649e-86	0.348469	0.753	0.343	1.72856e-81
Elob	1.00762e-85	0.481313	0.938	0.709	1.88164e-81
Cacybp	1.44198e-85	0.363669	0.775	0.351	2.69275e-81
Cd44	2.04777e-85	0.290642	0.642	0.243	3.82401e-81
Cdkn2aipnl	4.24704e-85	0.206764	0.241	0.05	7.93092e-81
Mettl9	9.37464e-85	0.371116	0.776	0.36	1.75062e-80
Actr1b	9.48706e-85	0.207842	0.582	0.206	1.77161e-80
Lbh	1.20954e-84	0.262534	0.394	0.116	2.2587e-80
Prkaca	1.44964e-84	0.238105	0.529	0.182	2.70705e-80
Rnf126	1.55481e-84	0.203779	0.525	0.178	2.90345e-80
Ubap2	1.95076e-84	0.205495	0.429	0.129	3.64285e-80
Serbp1	3.53693e-84	0.553291	0.878	0.569	6.60487e-80
Naa38	3.5682e-84	0.262813	0.779	0.333	6.66325e-80
Dynll2	3.98502e-84	0.270051	0.719	0.297	7.44163e-80
Ube2j2	4.00336e-84	0.245237	0.694	0.278	7.47587e-80
Mif	7.04579e-84	0.716553	0.739	0.403	1.31573e-79
Tmem107	7.41522e-84	0.286954	0.602	0.222	1.38472e-79
Zcchc17	1.02851e-83	0.271287	0.713	0.289	1.92065e-79
Oard1	1.06031e-83	0.205597	0.455	0.142	1.98002e-79
Gtf2a2	1.06655e-83	0.364552	0.775	0.359	1.99168e-79
Eif1ax	2.11007e-83	0.351079	0.782	0.359	3.94034e-79
Ap2s1	2.47014e-83	0.401066	0.856	0.443	4.61275e-79
Slbp	3.39063e-83	0.379087	0.631	0.254	6.33167e-79
Phf5a	4.38398e-83	0.274648	0.69	0.282	8.18665e-79
Mak16	4.51741e-83	0.221271	0.481	0.158	8.43581e-79
Tap1	5.89794e-83	0.269272	0.528	0.182	1.10138e-78
Mbd3	7.48532e-83	0.33596	0.85	0.405	1.39781e-78
Tssc4	8.52883e-83	0.211737	0.523	0.18	1.59267e-78
Hnrnpa3	9.03493e-83	0.460816	0.884	0.527	1.68718e-78
Srp9	1.40395e-82	0.482352	0.89	0.547	2.62173e-78
Znhit1	5.58827e-82	0.208769	0.665	0.258	1.04355e-77
Zwint	7.72545e-82	0.209446	0.625	0.237	1.44265e-77
Cmpk1	8.38074e-82	0.331799	0.795	0.365	1.56502e-77
Mzt1	1.39375e-81	0.208238	0.44	0.137	2.60269e-77
Gpx7	2.51084e-81	0.673803	0.824	0.493	4.68874e-77
Wdr1	2.70029e-81	0.299395	0.727	0.306	5.04253e-77
Plod1	3.9035e-81	0.305469	0.761	0.324	7.28939e-77
Adgre5	5.06536e-81	0.250691	0.455	0.149	9.45905e-77
Cdk5rap2	8.55873e-81	0.208862	0.315	0.08	1.59826e-76
Nudc	9.17777e-81	0.416484	0.83	0.43	1.71386e-76
Sec11c	9.32623e-81	0.236228	0.711	0.284	1.74158e-76
Acp1	2.96928e-80	0.372707	0.847	0.429	5.54484e-76
Vdac1	5.01346e-80	0.356682	0.762	0.355	9.36213e-76
Coa6	5.26037e-80	0.220698	0.531	0.186	9.82322e-76
Cnih4	6.16067e-80	0.392041	0.778	0.377	1.15044e-75
Arpc5l	7.30884e-80	0.289544	0.748	0.326	1.36485e-75
Cwc15	1.23799e-79	0.363994	0.799	0.389	2.31182e-75
Psmd14	1.5108e-79	0.275853	0.664	0.265	2.82128e-75
Ndufb8	1.78536e-79	0.423697	0.855	0.474	3.33399e-75
Mrps7	4.57482e-79	0.213954	0.691	0.274	8.54302e-75
Mrpl57	4.75799e-79	0.29007	0.77	0.346	8.88508e-75
Fam216a	6.1388e-79	0.285693	0.401	0.124	1.14636e-74
Cald1	7.04593e-79	0.610765	0.909	0.762	1.31576e-74
Npm1	1.4037e-78	0.625729	0.924	0.721	2.62128e-74
Ppm1g	1.50473e-78	0.207714	0.549	0.198	2.80993e-74
2010107E04Rik	1.6097e-78	0.424893	0.835	0.448	3.00595e-74
Snrpa	2.78934e-78	0.205926	0.569	0.209	5.2088e-74
Pde6d	6.3123e-78	0.229791	0.677	0.271	1.17876e-73
Sem1	7.63625e-78	0.452342	0.941	0.711	1.42599e-73
Cyb5b	1.1537e-77	0.208484	0.574	0.212	2.15442e-73
Clic1	2.22396e-77	0.634564	0.894	0.605	4.15303e-73
Dcun1d5	4.22877e-77	0.341407	0.762	0.361	7.89681e-73
Psmb9	5.03443e-77	0.338645	0.617	0.25	9.40129e-73
Ube2n	2.42746e-76	0.359784	0.792	0.393	4.53305e-72
Ube2m	2.8543e-76	0.290724	0.775	0.348	5.33011e-72
Vasp	3.3168e-76	0.22945	0.659	0.265	6.19379e-72
Pa2g4	4.25977e-76	0.277755	0.721	0.313	7.9547e-72
Gipc1	7.85866e-76	0.209767	0.543	0.196	1.46753e-71
Mlf2	8.71357e-76	0.428998	0.799	0.427	1.62717e-71
Golt1b	8.97891e-76	0.225866	0.579	0.219	1.67672e-71
Atp5j	1.43758e-75	0.477308	0.934	0.692	2.68453e-71
Smchd1	1.98429e-75	0.218368	0.61	0.232	3.70547e-71
Nxn	2.73996e-75	0.201103	0.38	0.115	5.11661e-71
Papd4	3.61217e-75	0.202676	0.509	0.178	6.74537e-71
Mtpn	4.46569e-75	0.332263	0.792	0.375	8.33923e-71
H2afy	5.27418e-75	0.324361	0.816	0.394	9.84901e-71
Chtop	5.33061e-75	0.20243	0.687	0.277	9.95438e-71
Hspe1	5.95684e-75	0.577928	0.824	0.542	1.11238e-70
Stat1	1.11535e-74	0.281102	0.599	0.235	2.08281e-70
Sumo2	1.12394e-74	0.48915	0.926	0.694	2.09884e-70
Pck2	1.13985e-74	0.255951	0.515	0.188	2.12856e-70
1810037I17Rik	1.3153e-74	0.500059	0.84	0.516	2.4562e-70
Ppp1r11	1.42178e-74	0.256753	0.704	0.297	2.65503e-70
Itga5	2.00101e-74	0.214644	0.466	0.159	3.73668e-70
Armcx2	3.47678e-74	0.210869	0.5	0.178	6.49254e-70
Snrpc	4.08757e-74	0.327395	0.789	0.378	7.63314e-70
Ube2a	6.09078e-74	0.210797	0.616	0.242	1.13739e-69
Elavl1	6.67438e-74	0.226977	0.687	0.287	1.24637e-69
Bet1	8.78604e-74	0.254973	0.69	0.292	1.64071e-69
Suds3	1.23212e-73	0.218687	0.637	0.253	2.30086e-69
Nop58	1.3301e-73	0.294417	0.742	0.331	2.48383e-69
Tma7	5.01856e-73	0.437394	0.878	0.567	9.37166e-69
Magoh	5.46892e-73	0.249194	0.698	0.299	1.02127e-68
Cyp1b1	7.98439e-73	0.412523	0.761	0.375	1.49101e-68
Plvap	1.19645e-72	0.255847	0.44	0.149	2.23425e-68
Serf2	1.27242e-72	0.496033	0.951	0.843	2.37611e-68
Trim28	2.21001e-72	0.202363	0.58	0.222	4.12697e-68
Ssbp1	2.63518e-72	0.220984	0.664	0.274	4.92094e-68
B4galt5	2.75084e-72	0.243913	0.409	0.135	5.13692e-68
Hdac2	5.12338e-72	0.254421	0.696	0.292	9.5674e-68
Ndufa2	1.04317e-71	0.431552	0.901	0.592	1.94801e-67
Psmc1	1.37502e-71	0.245986	0.639	0.263	2.56771e-67
Hnrnpc	2.08494e-71	0.407393	0.813	0.445	3.89342e-67
Bud31	4.15221e-71	0.258566	0.721	0.323	7.75383e-67
Rfc1	4.98204e-71	0.271947	0.577	0.23	9.30346e-67
H2-T22	5.01351e-71	0.429811	0.809	0.422	9.36223e-67
Uqcr10	5.0457e-71	0.391157	0.852	0.492	9.42234e-67
Cenpx	5.09588e-71	0.271122	0.759	0.362	9.51604e-67
1500009L16Rik	7.85256e-71	0.250366	0.285	0.077	1.46639e-66
Gjc1	8.05493e-71	0.205744	0.42	0.14	1.50418e-66
Ube2e3	8.17626e-71	0.243368	0.685	0.289	1.52684e-66
Trp53	9.9465e-71	0.271125	0.707	0.307	1.85741e-66
Pim1	1.44276e-70	0.302263	0.542	0.212	2.69421e-66
Strap	1.48181e-70	0.306209	0.736	0.339	2.76713e-66
Mmp19	1.52601e-70	0.285388	0.597	0.241	2.84967e-66
Arf6	2.4776e-70	0.206811	0.651	0.268	4.62666e-66
Pgam1	2.8486e-70	0.434393	0.829	0.464	5.31948e-66
Fam96b	3.4694e-70	0.235505	0.721	0.318	6.47876e-66
Ergic2	3.47407e-70	0.222557	0.741	0.324	6.48747e-66
Babam1	4.10093e-70	0.213258	0.614	0.244	7.65808e-66
Apex1	4.59375e-70	0.200344	0.502	0.184	8.57836e-66
Naa20	5.43619e-70	0.247909	0.745	0.339	1.01515e-65
Col4a1	5.47721e-70	0.545715	0.84	0.541	1.02281e-65
Manf	5.96668e-70	0.443328	0.847	0.508	1.11422e-65
Pdzd11	1.00774e-69	0.204728	0.59	0.23	1.88186e-65
Mrpl33	1.29203e-69	0.399458	0.867	0.534	2.41275e-65
Cdc42se1	2.59975e-69	0.223388	0.633	0.257	4.85477e-65
Mrps18c	2.79813e-69	0.223458	0.681	0.292	5.22522e-65
Rbm8a	3.89073e-69	0.290092	0.755	0.363	7.26554e-65
Atp5g1	4.49622e-69	0.44102	0.895	0.597	8.39625e-65
Ap3s1	5.35114e-69	0.385561	0.832	0.464	9.99272e-65
Etf1	6.00304e-69	0.229591	0.719	0.31	1.12101e-64
Commd1	6.08362e-69	0.313809	0.772	0.373	1.13605e-64
Mrps15	6.85293e-69	0.236788	0.687	0.297	1.27972e-64
Rps17	7.95433e-69	0.483133	0.934	0.834	1.48539e-64
Mrpl17	9.8469e-69	0.343736	0.764	0.382	1.83881e-64
Rpl15	1.02942e-68	0.452044	0.932	0.855	1.92234e-64
Higd1a	1.29595e-68	0.320347	0.745	0.356	2.42005e-64
Timm10b	1.54993e-68	0.279749	0.716	0.329	2.89433e-64
Rbbp7	2.24296e-68	0.348135	0.798	0.418	4.18851e-64
Ppp1cc	2.53833e-68	0.360482	0.827	0.432	4.74008e-64
Mlec	2.65973e-68	0.312696	0.801	0.398	4.96677e-64
Prmt1	2.79714e-68	0.271793	0.691	0.315	5.22339e-64
Mrps16	2.93251e-68	0.297548	0.785	0.39	5.47616e-64
Tcp1	3.18742e-68	0.423912	0.823	0.476	5.95219e-64
Smc1a	3.55467e-68	0.340463	0.84	0.424	6.63799e-64
Nsmce4a	3.7547e-68	0.26576	0.67	0.283	7.01153e-64
Hmgn1	3.78194e-68	0.456039	0.898	0.666	7.06239e-64
Tnfaip2	4.36293e-68	0.203217	0.522	0.197	8.14733e-64
Arl2bp	5.46661e-68	0.223041	0.679	0.288	1.02084e-63
Calm3	7.89354e-68	0.462785	0.878	0.535	1.47404e-63
Atpif1	8.56224e-68	0.457499	0.881	0.571	1.59891e-63
Sec61b	1.1498e-67	0.463981	0.9	0.637	2.14713e-63
Snrpd2	1.27754e-67	0.401465	0.856	0.533	2.38567e-63
Ppp1ca	5.30811e-67	0.449214	0.87	0.588	9.91237e-63
Zfp706	8.83602e-67	0.300463	0.815	0.432	1.65004e-62
Mrpl14	1.27351e-66	0.337746	0.769	0.402	2.37816e-62
M6pr	1.4694e-66	0.204568	0.62	0.255	2.74396e-62
Bola2	3.01845e-66	0.225322	0.667	0.297	5.63666e-62
Dnajc19	3.62106e-66	0.264381	0.807	0.401	6.76197e-62
Glipr2	4.07968e-66	0.225936	0.693	0.303	7.6184e-62
Rps2	4.47471e-66	0.517962	0.912	0.814	8.35607e-62
Ptpa	6.199e-66	0.21306	0.576	0.228	1.1576e-61
Rplp2	6.85492e-66	0.473132	0.926	0.777	1.28009e-61
Mrpl13	7.92985e-66	0.20862	0.701	0.303	1.48082e-61
Gm13889	1.34047e-65	0.227933	0.202	0.045	2.50319e-61
S100a4	1.8447e-65	0.398697	0.381	0.129	3.4448e-61
Rpl39	2.14253e-65	0.472299	0.934	0.838	4.00095e-61
2022-09-11	2.55944e-65	0.284714	0.776	0.373	4.7795e-61
Ap2m1	4.28201e-65	0.373147	0.858	0.519	7.99622e-61
Cby1	7.45647e-65	0.206455	0.401	0.136	1.39242e-60
Atp5o.1	1.04875e-64	0.408043	0.84	0.519	1.95843e-60
Ctcf	1.60764e-64	0.26194	0.637	0.271	3.00211e-60
Lgmn	1.68828e-64	0.431523	0.694	0.344	3.1527e-60
Nop56	2.46419e-64	0.269544	0.586	0.245	4.60162e-60
Ccl7	3.90434e-64	0.771607	0.546	0.257	7.29097e-60
Snrpd3	5.59505e-64	0.298082	0.744	0.372	1.04482e-59
Rpl29	9.63945e-64	0.489347	0.91	0.731	1.80007e-59
Atp5g3	1.46114e-63	0.370709	0.826	0.49	2.72854e-59
Srsf10	1.73322e-63	0.212078	0.685	0.299	3.23661e-59
Gpx4	3.9068e-63	0.444721	0.92	0.723	7.29555e-59
Rbm3	4.64948e-63	0.458841	0.92	0.646	8.68244e-59
Pycard	5.12562e-63	0.283581	0.56	0.233	9.57158e-59
Scarb2	7.04487e-63	0.267808	0.742	0.361	1.31556e-58
Fzd1	1.33318e-62	0.217324	0.557	0.225	2.48959e-58
Nudt4	1.85344e-62	0.225347	0.696	0.308	3.46112e-58
Gltp	2.25072e-62	0.232285	0.603	0.253	4.203e-58
Rpl31	2.63565e-62	0.484742	0.894	0.722	4.92181e-58
Swi5	3.30333e-62	0.412154	0.921	0.682	6.16863e-58
Psmb7	3.48154e-62	0.351661	0.731	0.375	6.50143e-58
Zfp91	3.56947e-62	0.276301	0.779	0.371	6.66563e-58
Edf1	3.77167e-62	0.44811	0.883	0.602	7.04322e-58
Tmem119	3.87089e-62	0.289726	0.668	0.306	7.2285e-58
Krtcap2	4.04079e-62	0.411244	0.924	0.727	7.54578e-58
Glrx5	6.07998e-62	0.230877	0.756	0.353	1.13538e-57
Rpl22l1	7.57666e-62	0.462977	0.92	0.807	1.41487e-57
Actn4	8.18293e-62	0.263171	0.713	0.33	1.52808e-57
Cox6a1	1.0428e-61	0.387721	0.897	0.612	1.94733e-57
H3f3a	1.11824e-61	0.45927	0.949	0.751	2.0882e-57
Thoc7	2.09899e-61	0.220019	0.793	0.387	3.91966e-57
Ilf2	2.7597e-61	0.21699	0.61	0.259	5.15346e-57
Hspd1	3.07049e-61	0.466896	0.75	0.44	5.73384e-57
Trappc1	3.74426e-61	0.210536	0.64	0.28	6.99203e-57
Ndufc1	4.26762e-61	0.318558	0.806	0.452	7.96935e-57
Dynll1	4.64546e-61	0.679356	0.903	0.774	8.67494e-57
Slfn2	6.7494e-61	0.219431	0.34	0.11	1.26038e-56
Ier3ip1	7.80765e-61	0.300295	0.819	0.446	1.458e-56
Ube2k	1.07949e-60	0.23616	0.816	0.408	2.01583e-56
Lsm12	1.0799e-60	0.204477	0.639	0.276	2.01661e-56
Phf11d	1.12886e-60	0.206539	0.517	0.206	2.10803e-56
Txnl1	1.15931e-60	0.28537	0.769	0.401	2.1649e-56
Fkbp4	1.55182e-60	0.220301	0.719	0.332	2.89787e-56
Luc7l3	1.85913e-60	0.225516	0.705	0.325	3.47173e-56
Emp1	2.18346e-60	0.457768	0.832	0.549	4.07739e-56
Gspt1	2.60221e-60	0.255379	0.755	0.367	4.85937e-56
Nono	2.68225e-60	0.217363	0.756	0.363	5.00883e-56
Fkbp3	3.00558e-60	0.294794	0.731	0.368	5.61262e-56
Stub1	3.35267e-60	0.34635	0.855	0.514	6.26077e-56
Eif6	3.60852e-60	0.353832	0.752	0.4	6.73856e-56
Sdhd	5.61432e-60	0.20564	0.738	0.355	1.04842e-55
Ccnd3	5.65234e-60	0.216339	0.693	0.32	1.05552e-55
Tmed2	5.69993e-60	0.421455	0.931	0.695	1.06441e-55
Dnajc8	7.33405e-60	0.278308	0.758	0.379	1.36956e-55
Rwdd1	1.05966e-59	0.320579	0.856	0.491	1.97881e-55
Cbx5	1.44448e-59	0.266978	0.631	0.284	2.69743e-55
Mrps17	1.69983e-59	0.217186	0.725	0.347	3.17427e-55
Serpinh1	2.24004e-59	0.473688	0.903	0.854	4.18305e-55
Psmb2	2.26352e-59	0.390776	0.852	0.541	4.2269e-55
Ptges3	2.36183e-59	0.262085	0.824	0.428	4.41047e-55
Hnrnpd	4.12338e-59	0.283354	0.747	0.369	7.7e-55
Cyc1	7.78961e-59	0.302378	0.722	0.367	1.45463e-54
Cbx3	9.07518e-59	0.443966	0.711	0.387	1.6947e-54
Papola	9.22534e-59	0.223425	0.792	0.388	1.72274e-54
Rpl36al	1.68903e-58	0.239583	0.701	0.346	3.15409e-54
Psma4	1.83237e-58	0.399117	0.849	0.544	3.42176e-54
Timm13	2.31892e-58	0.353941	0.849	0.525	4.33035e-54
H3f3b	2.44021e-58	0.631054	0.904	0.718	4.55685e-54
Pcbp2	2.9857e-58	0.357299	0.935	0.675	5.5755e-54
Hnrnpf	3.10092e-58	0.43977	0.856	0.575	5.79067e-54
Serp1	3.19789e-58	0.342127	0.813	0.454	5.97174e-54
Rad50	3.44934e-58	0.203239	0.522	0.207	6.4413e-54
Zc3h15	4.16549e-58	0.247067	0.79	0.38	7.77864e-54
Col4a2	8.98064e-58	0.387632	0.833	0.51	1.67704e-53
Tmem258	1.09523e-57	0.375578	0.812	0.482	2.04524e-53
Saa3	1.24419e-57	0.929475	0.253	0.076	2.32339e-53
Bst2	1.99866e-57	0.602919	0.782	0.499	3.73229e-53
Scoc	2.11972e-57	0.211731	0.568	0.236	3.95837e-53
Mapre1	2.1857e-57	0.281828	0.832	0.452	4.08157e-53
Ndufs5	2.19904e-57	0.350507	0.856	0.536	4.10649e-53
Elof1	2.77977e-57	0.207585	0.744	0.36	5.19095e-53
Ets1	6.22503e-57	0.220168	0.318	0.103	1.16246e-52
Rpl32	7.2873e-57	0.411582	0.943	0.907	1.36083e-52
Smarca5	7.86601e-57	0.242652	0.778	0.391	1.4689e-52
Cox6b1	8.43243e-57	0.370929	0.9	0.621	1.57467e-52
Tmed5	1.26384e-56	0.216603	0.735	0.352	2.36009e-52
Fam104a	1.34772e-56	0.252067	0.782	0.405	2.51674e-52
Mdh2	2.77382e-56	0.344364	0.813	0.492	5.17984e-52
Cstb	3.14449e-56	0.461439	0.807	0.517	5.87202e-52
Xaf1	3.73518e-56	0.207396	0.585	0.249	6.97508e-52
Fkbp2	6.40604e-56	0.328572	0.866	0.522	1.19626e-51
Mrpl52	7.99629e-56	0.355233	0.821	0.502	1.49323e-51
Cmtm7	1.19321e-55	0.221095	0.633	0.28	2.22821e-51
Polr2m	1.99821e-55	0.205815	0.708	0.341	3.73145e-51
Erp29	2.01134e-55	0.395831	0.847	0.565	3.75599e-51
Vmp1	2.1593e-55	0.213589	0.594	0.267	4.03227e-51
Plpp1	2.89847e-55	0.258678	0.653	0.307	5.41259e-51
Ddx39b	3.3258e-55	0.247752	0.724	0.36	6.21059e-51
Nedd8	4.31288e-55	0.339955	0.87	0.569	8.05388e-51
Morf4l2	4.40552e-55	0.440971	0.867	0.599	8.22687e-51
Ube2l3	7.18365e-55	0.300209	0.775	0.421	1.34148e-50
Ssr2	8.19821e-55	0.402915	0.836	0.551	1.53093e-50
Cox6c	8.7163e-55	0.385417	0.9	0.659	1.62768e-50
Snrpb	1.33932e-54	0.355156	0.875	0.587	2.50105e-50
Tomm20	1.35477e-54	0.365524	0.802	0.486	2.52991e-50
Ndufab1	1.40823e-54	0.29236	0.815	0.48	2.62974e-50
Cxcl14	2.22628e-54	0.370689	0.557	0.26	4.15736e-50
Fxyd5	4.03085e-54	0.274687	0.693	0.342	7.52722e-50
Abracl	9.23035e-54	0.285499	0.762	0.396	1.72368e-49
Cops6	9.23639e-54	0.248559	0.753	0.386	1.7248e-49
Trim47	3.72901e-53	0.222349	0.673	0.324	6.96355e-49
Usmg5	6.49256e-53	0.262524	0.71	0.378	1.21242e-48
Hp1bp3	8.01779e-53	0.282089	0.784	0.41	1.49724e-48
Ewsr1	8.22933e-53	0.20683	0.747	0.366	1.53675e-48
Fabp4	1.70299e-52	0.85952	0.403	0.173	3.18016e-48
Zcrb1	2.19545e-52	0.247275	0.761	0.407	4.09978e-48
Psma3	2.87749e-52	0.405909	0.873	0.622	5.37342e-48
Tpm2	5.59264e-52	0.351025	0.409	0.171	1.04437e-47
Tspan4	6.70574e-52	0.289613	0.696	0.368	1.25223e-47
Ssu72	9.52398e-52	0.220512	0.721	0.356	1.77851e-47
Snu13	1.62317e-51	0.308103	0.826	0.492	3.03111e-47
Rplp1	2.79512e-51	0.426529	0.921	0.843	5.21961e-47
Eno1	7.52627e-51	0.23431	0.586	0.273	1.40546e-46
Cnih1	1.35049e-50	0.216715	0.802	0.416	2.5219e-46
Spcs1	1.77448e-50	0.363153	0.87	0.602	3.31366e-46
Cox5b	2.13419e-50	0.294936	0.826	0.497	3.98538e-46
Tnfrsf12a	2.22534e-50	0.222466	0.539	0.238	4.1556e-46
Mrps14	2.4031e-50	0.233644	0.815	0.465	4.48755e-46
Ssr1	2.4492e-50	0.25966	0.79	0.437	4.57364e-46
Acta2	3.56469e-50	0.538468	0.276	0.096	6.65671e-46
Rplp0	4.29259e-50	0.407132	0.924	0.891	8.01599e-46
Impdh2	6.65329e-50	0.252467	0.733	0.393	1.24244e-45
Rpl13a	1.37163e-49	0.407888	0.841	0.582	2.56139e-45
Anapc13	1.3851e-49	0.233298	0.736	0.386	2.58654e-45
Bax	3.67396e-49	0.280112	0.796	0.448	6.86075e-45
Pomp	3.88494e-49	0.311459	0.856	0.556	7.25474e-45
Rtp4	4.75566e-49	0.263819	0.583	0.281	8.88072e-45
Atp5l	5.90616e-49	0.318239	0.927	0.687	1.10292e-44
Atp5j2	6.22285e-49	0.316784	0.883	0.597	1.16206e-44
Sod2	7.17598e-49	0.632017	0.611	0.339	1.34004e-44
Akirin2	1.22967e-48	0.220002	0.636	0.304	2.29629e-44
Lmo4	1.54295e-48	0.248749	0.727	0.374	2.8813e-44
Isg15	4.03724e-48	0.54138	0.585	0.3	7.53915e-44
Trir	4.3507e-48	0.28423	0.776	0.453	8.1245e-44
Ndufa3	4.79714e-48	0.212039	0.728	0.384	8.95818e-44
Mrfap1	6.38406e-48	0.323137	0.918	0.699	1.19216e-43
Chchd2	7.56101e-48	0.41737	0.9	0.731	1.41194e-43
Srrm1	7.84117e-48	0.242611	0.812	0.445	1.46426e-43
P4hb	8.30478e-48	0.347712	0.877	0.65	1.55084e-43
Sumo1	1.00185e-47	0.297587	0.818	0.507	1.87086e-43
Thbs1	1.29113e-47	0.40286	0.512	0.241	2.41105e-43
Txn1	1.80294e-47	0.409148	0.914	0.741	3.36681e-43
Nrep	2.10642e-47	0.285982	0.421	0.172	3.93352e-43
D8Ertd738e	2.18524e-47	0.300006	0.889	0.603	4.08072e-43
Mrpl54	2.48526e-47	0.226408	0.775	0.415	4.64097e-43
Mrpl20	2.70028e-47	0.230316	0.762	0.423	5.04249e-43
Chchd1	3.50488e-47	0.230677	0.762	0.418	6.54501e-43
Ptms	3.87229e-47	0.431659	0.88	0.652	7.23112e-43
Atp5b	3.99553e-47	0.458052	0.846	0.627	7.46125e-43
Ryk	4.14279e-47	0.256862	0.779	0.43	7.73625e-43
Plin2	4.32507e-47	0.34106	0.685	0.383	8.07663e-43
Pabpc1	4.6753e-47	0.343861	0.923	0.717	8.73066e-43
Psmb8	4.94498e-47	0.362817	0.769	0.456	9.23425e-43
Fkbp10	7.05823e-47	0.244288	0.742	0.387	1.31805e-42
Rps19	1.12198e-46	0.347988	0.96	0.924	2.09518e-42
Marcksl1	5.42389e-46	0.205447	0.326	0.118	1.01286e-41
Hsp90ab1	6.00649e-46	0.362497	0.96	0.889	1.12165e-41
Rbx1	8.79246e-46	0.336166	0.867	0.596	1.6419e-41
Csrp1	1.01562e-45	0.228183	0.505	0.237	1.89656e-41
Ncl	1.03285e-45	0.402151	0.849	0.584	1.92875e-41
Arhgdia	1.20939e-45	0.301101	0.87	0.587	2.25842e-41
Pkm	1.25855e-45	0.401335	0.767	0.491	2.35021e-41
Fam162a	1.72501e-45	0.271477	0.761	0.428	3.22127e-41
Jpt1	2.98343e-45	0.44131	0.873	0.599	5.57125e-41
Tbca	5.89724e-45	0.260333	0.872	0.564	1.10125e-40
Myl12a	7.96138e-45	0.390808	0.907	0.697	1.48671e-40
Col15a1	1.21442e-44	0.314379	0.809	0.501	2.2678e-40
Actr3	1.27787e-44	0.332393	0.816	0.478	2.38629e-40
Ndufa12	1.46285e-44	0.238262	0.724	0.407	2.73172e-40
H1f0	1.4735e-44	0.545391	0.705	0.407	2.75161e-40
Tpm3	2.4218e-44	0.228582	0.792	0.441	4.52248e-40
Cox14	2.97106e-44	0.228182	0.796	0.462	5.54815e-40
Cct7	3.30573e-44	0.254143	0.767	0.423	6.17312e-40
Ndufa5	5.05576e-44	0.253204	0.744	0.433	9.44113e-40
Hnrnpu	5.45602e-44	0.3438	0.884	0.608	1.01886e-39
Psmd7	5.61733e-44	0.298987	0.816	0.519	1.04898e-39
Smc3	5.65531e-44	0.200967	0.764	0.399	1.05607e-39
Rer1	7.53786e-44	0.28331	0.87	0.595	1.40762e-39
Rsad2	8.3391e-44	0.503329	0.264	0.092	1.55724e-39
Sdhb	8.55982e-44	0.226739	0.793	0.45	1.59846e-39
Arpc1b	1.0539e-43	0.368381	0.897	0.756	1.96805e-39
Tomm22	1.11901e-43	0.255721	0.745	0.432	2.08964e-39
Lpl	1.52247e-43	0.458274	0.799	0.578	2.84307e-39
Nop10	1.80984e-43	0.308038	0.759	0.465	3.3797e-39
Rheb	1.83681e-43	0.264068	0.852	0.55	3.43006e-39
Rpl23a	2.28106e-43	0.364073	0.94	0.879	4.25965e-39
Tspo	2.37267e-43	0.370601	0.903	0.683	4.43073e-39
Ubl5	3.03115e-43	0.260663	0.84	0.526	5.66037e-39
Ly6e	3.661e-43	0.456681	0.802	0.572	6.83656e-39
Hnrnpa0	6.37675e-43	0.278465	0.87	0.547	1.1908e-38
Map4k4	9.66584e-43	0.226196	0.781	0.415	1.805e-38
Eif2s2	1.07283e-42	0.303462	0.835	0.533	2.0034e-38
Smc6	1.28273e-42	0.25809	0.846	0.516	2.39537e-38
Minos1	1.39911e-42	0.281674	0.864	0.578	2.6127e-38
Ywhaq	2.43894e-42	0.309916	0.853	0.584	4.55448e-38
Pdcd5	2.44308e-42	0.247258	0.802	0.494	4.56221e-38
Ywhae	2.63772e-42	0.301649	0.897	0.65	4.92567e-38
Psme2	2.81121e-42	0.254997	0.789	0.448	5.24966e-38
Atp5f1	3.36882e-42	0.320148	0.858	0.62	6.29093e-38
Cdv3	3.71961e-42	0.210441	0.75	0.408	6.946e-38
Angptl4	5.07178e-42	0.481535	0.691	0.453	9.47103e-38
Sf3b6	9.24585e-42	0.211416	0.801	0.465	1.72657e-37
Pcbp1	1.06355e-41	0.284205	0.852	0.575	1.98608e-37
Tmem256	1.5237e-41	0.255389	0.798	0.484	2.84537e-37
Rgcc	3.19423e-41	0.273535	0.276	0.103	5.96491e-37
Pdgfrb	3.58933e-41	0.202959	0.679	0.358	6.70272e-37
Irf7	4.28285e-41	0.203108	0.505	0.236	7.9978e-37
Ifi27	1.8559e-40	0.472557	0.787	0.583	3.46571e-36
Eif4ebp1	2.44902e-40	0.24432	0.756	0.444	4.57331e-36
Eif3c	2.79318e-40	0.226503	0.864	0.514	5.21598e-36
Phb2	3.84554e-40	0.231393	0.744	0.439	7.18117e-36
Rps6	3.99824e-40	0.317434	0.94	0.907	7.46631e-36
Anapc5	4.49054e-40	0.215289	0.792	0.47	8.38563e-36
Ssb	4.97753e-40	0.316113	0.844	0.564	9.29504e-36
Tuba1a	8.59549e-40	0.456381	0.886	0.789	1.60512e-35
Srsf3	9.92895e-40	0.323432	0.852	0.585	1.85413e-35
Rexo2	1.13019e-39	0.275765	0.838	0.568	2.11052e-35
Arpc2	2.11419e-39	0.336138	0.883	0.647	3.94803e-35
Srm	3.43362e-39	0.282864	0.679	0.393	6.41194e-35
Atp5e	4.03759e-39	0.292862	0.884	0.661	7.5398e-35
Lgals3bp	8.12296e-39	0.251497	0.785	0.476	1.51688e-34
Calm1	8.37115e-39	0.362989	0.941	0.818	1.56323e-34
Rpl24	8.59917e-39	0.300492	0.946	0.884	1.60581e-34
Tnfrsf1a	8.65498e-39	0.241908	0.784	0.473	1.61623e-34
Srsf2	1.12592e-38	0.260692	0.793	0.506	2.10254e-34
B2m	1.9256e-38	0.394735	0.926	0.794	3.59587e-34
Psmb3	2.18804e-38	0.239151	0.765	0.468	4.08594e-34
Actg1	2.88198e-38	0.506	0.894	0.744	5.38181e-34
Sub1	4.25159e-38	0.322731	0.761	0.487	7.93943e-34
Uqcrb	8.79707e-38	0.290506	0.849	0.602	1.64277e-33
Ndufb7	1.42017e-37	0.203678	0.799	0.489	2.65202e-33
Psma6	2.52947e-37	0.202427	0.718	0.411	4.72352e-33
Psma7	7.27448e-37	0.306142	0.846	0.622	1.35844e-32
Iigp1	8.55853e-37	0.389297	0.535	0.29	1.59822e-32
Gtf2h5	9.19044e-37	0.211777	0.818	0.497	1.71622e-32
Mt2	1.17483e-36	0.714923	0.593	0.381	2.19388e-32
Srsf6	1.24436e-36	0.203056	0.745	0.434	2.32371e-32
Mydgf	2.16755e-36	0.238228	0.798	0.504	4.04768e-32
Ccnd2	3.99977e-36	0.287784	0.698	0.411	7.46916e-32
Polr1d	4.95898e-36	0.256836	0.812	0.541	9.2604e-32
Tpr	9.62483e-36	0.222571	0.892	0.559	1.79734e-31
Surf4	1.03761e-35	0.214237	0.801	0.49	1.93763e-31
Rps16	1.76373e-35	0.271403	0.952	0.919	3.29359e-31
Rtraf	1.76743e-35	0.252936	0.87	0.607	3.30049e-31
Rps15a	2.42582e-35	0.289029	0.935	0.908	4.52998e-31
Ndufb5	4.21754e-35	0.231657	0.84	0.55	7.87583e-31
Tpi1	4.97153e-35	0.274153	0.733	0.453	9.28383e-31
Prdx1	3.16507e-34	0.443214	0.86	0.712	5.91045e-30
Lman1	3.25501e-34	0.243888	0.826	0.53	6.0784e-30
Svbp	9.29095e-34	0.20777	0.767	0.456	1.73499e-29
Atox1	9.42708e-34	0.252206	0.873	0.618	1.76041e-29
Gnai2	1.30064e-33	0.277988	0.927	0.718	2.42882e-29
Rpl35	2.68621e-33	0.226683	0.853	0.595	5.01624e-29
Ssr4	2.81969e-33	0.285928	0.864	0.658	5.26548e-29
Rac1	9.97041e-33	0.221377	0.917	0.663	1.86187e-28
Cd36	1.79235e-32	0.312424	0.312	0.137	3.34704e-28
Npc2	2.46524e-32	0.378352	0.866	0.745	4.60358e-28
Crip2	3.04425e-32	0.303861	0.761	0.491	5.68483e-28
Eef1g	3.86139e-32	0.333317	0.875	0.755	7.21077e-28
Psma5	7.21634e-32	0.210794	0.769	0.48	1.34758e-27
Rps18	2.10684e-31	0.333828	0.897	0.857	3.93432e-27
Prkar1a	4.69989e-31	0.225711	0.759	0.476	8.77658e-27
Rpl37	4.73991e-31	0.266594	0.931	0.852	8.85131e-27
Btf3	1.21985e-30	0.276685	0.903	0.752	2.27795e-26
Rps25	1.53318e-30	0.286695	0.909	0.85	2.86306e-26
Reep5	2.79115e-30	0.238705	0.895	0.669	5.2122e-26
Fkbp1a	3.70513e-30	0.244659	0.898	0.71	6.91897e-26
Ostc	3.949e-30	0.263673	0.877	0.658	7.37436e-26
Tmed9	3.3023e-29	0.248364	0.883	0.673	6.16671e-25
Gnb2	8.69549e-29	0.273857	0.894	0.694	1.6238e-24
Rpl37a	1.46206e-28	0.234106	0.931	0.872	2.73024e-24
Cavin3	2.54677e-28	0.279074	0.901	0.749	4.75583e-24
Eif5	2.92173e-28	0.230745	0.872	0.615	5.45603e-24
Cnbp	3.04073e-28	0.292675	0.843	0.65	5.67827e-24
Rps27a	3.68677e-28	0.254209	0.943	0.905	6.88467e-24
Eif4g2	4.39756e-28	0.224765	0.9	0.674	8.21201e-24
Rpl36a	1.34939e-27	0.211833	0.86	0.629	2.51985e-23
Arf5	1.99064e-27	0.228862	0.914	0.738	3.71733e-23
Anxa2	2.82258e-27	0.351414	0.863	0.737	5.27089e-23
Rhoc	2.98331e-27	0.237346	0.833	0.592	5.57104e-23
Rpl14	6.54069e-27	0.257893	0.937	0.868	1.22141e-22
Hnrnpk	1.5459e-26	0.249245	0.88	0.671	2.88681e-22
Gdi2	1.6094e-26	0.209795	0.873	0.614	3.0054e-22
Arf1	4.75009e-26	0.245507	0.886	0.682	8.87032e-22
Vkorc1	5.63001e-26	0.21554	0.826	0.594	1.05135e-21
Rpl11	5.76997e-26	0.242862	0.923	0.842	1.07748e-21
Rps11	9.36388e-26	0.237297	0.946	0.897	1.74861e-21
Rps26	1.54644e-25	0.27358	0.895	0.815	2.88783e-21
Rpl21	9.05359e-25	0.20804	0.932	0.848	1.69067e-20
Rpl6	1.72189e-24	0.239774	0.931	0.879	3.21545e-20
Rps3	1.26462e-23	0.217213	0.948	0.898	2.36156e-19
Gng11	2.10627e-23	0.257239	0.674	0.42	3.93325e-19
Rps7	1.16323e-22	0.216918	0.924	0.87	2.17222e-18
Fabp5	1.78248e-22	0.235003	0.289	0.145	3.3286e-18
Kdelr2	1.79789e-21	0.274285	0.699	0.5	3.35738e-17
Rpsa	3.65191e-21	0.228945	0.934	0.856	6.81957e-17
Rpl10a	6.84227e-21	0.270798	0.9	0.846	1.27773e-16
Rpl34	3.08177e-20	0.219552	0.937	0.889	5.7549e-16
Ifit3	3.88778e-20	0.263736	0.332	0.174	7.26004e-16
Ifitm3	2.70352e-19	0.295393	0.867	0.837	5.04855e-15
Eif4a1	9.06728e-19	0.296335	0.77	0.626	1.69322e-14
Hspa8	4.22692e-18	0.38624	0.802	0.703	7.89335e-14
Rpl36	6.66592e-18	0.215525	0.897	0.818	1.24479e-13
Mt1	8.64777e-18	0.595828	0.634	0.531	1.61488e-13
Rpl3	1.06485e-16	0.226808	0.927	0.882	1.98851e-12
Calr	1.20253e-16	0.206067	0.866	0.761	2.2456e-12
Vim	6.07604e-15	0.240669	0.963	0.871	1.13464e-10
Myl6	6.93219e-15	0.215849	0.872	0.763	1.29452e-10
H2-K1	2.68966e-14	0.32908	0.801	0.65	5.02267e-10
Tm4sf1	1.31395e-13	0.349387	0.392	0.26	2.45367e-09
Cd63	3.93223e-10	0.216508	0.85	0.808	7.34305e-06
AW112010	1.92577e-09	0.352283	0.444	0.335	3.59618e-05
Actb	0.00367995	0.322634	0.42	0.521	1
