# Supplementary material for: Deconstructing cold-induced brown adipocyte neogenesis in mice
Source: eLife. 2022 Jul 18;11:e80167. doi: 10.7554/eLife.80167 (PMC9348851; doi:10.7554/eLife.80167)
Supplement: Supplementary file 5. [file elife-80167-supp5.xlsx]

## Sheet: INFORMATION
Supplementary File 5. DEGs for each cluster in the CONTROL, COLD, and CL Lin- iBAT data.
Related to Supplementary Figure 4C.
List of DEGs define by Seurat by graph-based clustering. Each cluster is a new tab.
iBAT, Lin- cells, CONTROL, COLD, and CL libraries.
Differentially expressed genes that define each cluster were identified using a Wilcoxon Rank Sum test in Seurat with the following parameters: min.pct = 0.20, logfc.threshold = 0.2, only.pos = TRUE.

## Sheet: VSMC
	p_val	avg_logFC	pct.1	pct.2	p_val_adj
Acta2	0	3.82035	0.678	0.314	0
Rgs5	0	3.78141	0.857	0.315	0
Tagln	0	3.53084	0.622	0.27	0
Myl9	0	3.3523	0.79	0.276	0
Tpm2	0	3.32506	0.811	0.334	0
Kcnj8	0	2.68327	0.554	0.169	0
Myh11	0	2.66658	0.592	0.17	0
Ppp1r14a	0	2.41446	0.799	0.19	0
Ndufa4l2	0	2.36748	0.885	0.342	0
Mylk	0	2.33623	0.689	0.255	0
Sncg	0	2.18283	0.693	0.272	0
Tpm1	0	2.17442	0.77	0.423	0
Art3	0	2.13999	0.607	0.219	0
Rasl11a	0	2.10914	0.748	0.276	0
Mfge8	0	2.02791	0.878	0.487	0
Abcc9	0	1.98653	0.588	0.152	0
Notch3	0	1.98462	0.757	0.238	0
Cox4i2	0	1.95379	0.693	0.21	0
Rgs4	0	1.94492	0.625	0.127	0
Lmod1	0	1.84952	0.511	0.102	0
Gucy1a1	0	1.83611	0.701	0.167	0
Higd1b	0	1.82422	0.551	0.153	0
Olfr558	0	1.72342	0.657	0.068	0
Gucy1b1	0	1.70368	0.647	0.191	0
Postn	0	1.66412	0.838	0.454	0
Mgp	0	1.66325	0.637	0.331	0
Tsc22d1	0	1.56316	0.849	0.463	0
Myo1b	0	1.55763	0.677	0.348	0
Gja4	0	1.52997	0.63	0.16	0
2022-09-04	0	1.51931	0.7	0.389	0
Dstn	0	1.51245	0.735	0.522	0
Nrip2	0	1.4994	0.497	0.09	0
Heyl	0	1.48828	0.548	0.207	0
Vtn	0	1.45574	0.631	0.217	0
Csrp1	0	1.43956	0.668	0.391	0
Flna	0	1.40134	0.667	0.375	0
Ngf	0	1.39112	0.529	0.198	0
Ppp1r12a	0	1.37877	0.73	0.362	0
Pcp4l1	0	1.35081	0.389	0.101	0
Rasgrp2	0	1.34531	0.585	0.267	0
Pdgfa	0	1.32505	0.553	0.211	0
Tinagl1	0	1.31732	0.794	0.342	0
Itga7	0	1.30574	0.525	0.202	0
Crip1	0	1.27425	0.872	0.652	0
Map3k20	0	1.24534	0.565	0.287	0
Nostrin	0	1.23764	0.425	0.141	0
Ano1	0	1.23569	0.466	0.082	0
Atp1b2	0	1.20602	0.524	0.172	0
Des	0	1.18286	0.537	0.227	0
Hopx	0	1.1705	0.494	0.123	0
Bcam	0	1.16334	0.63	0.277	0
Itga1	0	1.1421	0.652	0.323	0
Ndrg2	0	1.11537	0.629	0.318	0
Rasd1	0	1.0865	0.529	0.223	0
Sorbs2	0	1.05364	0.351	0.077	0
Serpini1	0	1.03734	0.489	0.151	0
Pdlim3	0	0.911272	0.494	0.046	0
Gng11	0	0.825399	0.843	0.558	0
Nrarp	0	0.812717	0.507	0.113	0
Rergl	0	0.803772	0.247	0.028	0
Tesc	0	0.801676	0.444	0.093	0
Nr4a1	0	0.791236	0.691	0.411	0
Esam	0	0.730516	0.728	0.406	0
Cck	0	0.686527	0.343	0.024	0
Hspb1	0	0.666688	0.863	0.55	0
Olfr78	0	0.6491	0.269	0.036	0
Hpcal4	0	0.638977	0.272	0.006	0
Igfbp5	0	0.622057	0.782	0.467	0
Sbspon	0	0.570382	0.277	0.039	0
Dgkb	0	0.506842	0.335	0.011	0
Map3k7cl	0	0.421147	0.223	0.004	0
Perp	0	0.408819	0.317	0.013	0
Ntng1	0	0.399913	0.395	0.042	0
Apela	0	0.347386	0.214	0	0
Cyp1b1	0	-0.769099	0.062	0.419	0
Basp1	0	-0.780134	0.09	0.422	0
Fbn1	0	-1.22427	0.346	0.608	0
B2m	0	-1.30224	0.664	0.855	0
S100a10	0	-1.49098	0.602	0.736	0
Clec3b	0	-2.3151	0.402	0.633	0
Col1a1	0	-2.32637	0.361	0.646	0
Dcn	0	-2.81535	0.299	0.661	0
Cpe	5.00363e-306	1.43849	0.509	0.165	1.00073e-302
Epas1	2.4783e-305	0.802369	0.644	0.366	4.95661e-302
Slc11a1	1.45763e-304	0.839702	0.456	0.131	2.91527e-301
Tmem51	8.69155e-303	0.743844	0.455	0.134	1.73831e-299
H2-K1	5.43246e-300	-1.2075	0.661	0.772	1.08649e-296
Mef2c	2.25312e-298	0.969636	0.594	0.296	4.50624e-295
Mnd1	1.7006e-288	2.0601	0.547	0.255	3.4012e-285
Cpxm1	2.19586e-288	-1.03786	0.26	0.492	4.39171e-285
Olfml2a	4.31515e-288	0.641326	0.462	0.159	8.6303e-285
Lum	1.95254e-286	-1.88387	0.403	0.593	3.90507e-283
Ccl11	1.51831e-285	-1.66857	0.413	0.593	3.03661e-282
Rbpms2	8.26067e-284	1.19933	0.497	0.193	1.65213e-280
Mcam	4.0398e-279	1.26023	0.509	0.145	8.0796e-276
Id4	1.43389e-278	1.74959	0.534	0.255	2.86778e-275
Ifi27l2a	3.27968e-276	-1.87396	0.533	0.646	6.55937e-273
Npc2	8.45703e-269	-1.18315	0.616	0.719	1.69141e-265
Tm4sf1	2.44841e-266	0.368277	0.757	0.472	4.89683e-263
Ptp4a3	2.2278e-250	0.994223	0.58	0.324	4.45561e-247
Gpx3	6.523e-247	-1.53691	0.507	0.642	1.3046e-243
Mustn1	1.94755e-244	1.50924	0.524	0.268	3.89511e-241
Agtr1a	2.50564e-241	1.28354	0.51	0.21	5.01129e-238
Arhgdib	3.79374e-237	1.0513	0.48	0.201	7.58749e-234
Col13a1	9.17344e-237	0.916345	0.356	0.071	1.83469e-233
Tnfrsf21	2.39039e-234	1.30555	0.503	0.254	4.78078e-231
Inpp4b	7.04583e-234	1.00569	0.432	0.079	1.40917e-230
Tbx5	9.8663e-234	1.18791	0.447	0.127	1.97326e-230
Timp4	2.09135e-233	0.992944	0.615	0.393	4.18271e-230
Ppp1r14b	1.74435e-232	-0.737449	0.365	0.556	3.4887e-229
Dclk1	4.84148e-225	-0.688735	0.095	0.399	9.68296e-222
AW112010	2.17804e-224	-1.26853	0.407	0.57	4.35608e-221
Ckb	1.00119e-223	1.11813	0.641	0.436	2.00237e-220
Abca8a	1.02999e-219	-0.905028	0.246	0.449	2.05999e-216
Ifi205	2.58715e-214	-0.599685	0.132	0.388	5.1743e-211
Meg3	1.12658e-213	0.926861	0.775	0.528	2.25316e-210
mt-Cytb	2.45951e-213	0.796366	0.553	0.33	4.91901e-210
Dapk2	1.39021e-209	0.979186	0.434	0.185	2.78043e-206
Fn1	2.54189e-205	-1.43035	0.379	0.539	5.08377e-202
Ly6k	3.50888e-204	0.568308	0.347	0.088	7.01775e-201
Gsn	5.34005e-203	-2.76743	0.553	0.615	1.06801e-199
Atp5b	2.33696e-202	0.50523	0.836	0.668	4.67392e-199
Bst2	3.44353e-201	-0.929412	0.52	0.678	6.88705e-198
Mfap5	4.45629e-199	-1.86731	0.484	0.588	8.91258e-196
Id1	6.3485e-196	0.325723	0.707	0.51	1.2697e-192
Cxcl12	6.35132e-196	0.926492	0.746	0.553	1.27026e-192
Cyp4b1	1.95056e-195	0.721695	0.526	0.276	3.90111e-192
Rnf152	2.33926e-192	0.82726	0.454	0.192	4.67852e-189
Lpl	9.51561e-192	-1.73846	0.65	0.705	1.90312e-188
Fam13a	1.76943e-191	0.300643	0.445	0.221	3.53886e-188
Hspa1a	1.12451e-187	0.472862	0.702	0.504	2.24903e-184
Bdnf	3.61544e-186	0.402312	0.336	0.032	7.23087e-183
Tbx2	5.21853e-183	1.16176	0.457	0.149	1.04371e-179
mt-Nd1	9.15073e-183	0.272962	0.585	0.374	1.83015e-179
Tnfaip6	2.96953e-181	-1.03105	0.392	0.522	5.93907e-178
Igfbp6	5.2051e-181	-2.05161	0.42	0.536	1.04102e-177
Cxcl9	7.17039e-181	-0.990111	0.264	0.448	1.43408e-177
Cspg4	6.53086e-179	1.05898	0.446	0.152	1.30617e-175
Cp	1.3681e-178	-0.604555	0.258	0.434	2.73619e-175
Gm42418	6.74122e-177	0.341059	0.916	0.761	1.34824e-173
Lrrc17	6.16753e-174	-0.619723	0.245	0.374	1.23351e-170
Actb	9.36781e-174	0.852655	0.593	0.346	1.87356e-170
Srpx	8.09449e-173	-0.985652	0.342	0.511	1.6189e-169
Fbxl22	2.52706e-170	1.05559	0.349	0.15	5.05411e-167
Akap6	2.32149e-169	0.254774	0.271	0.022	4.64299e-166
mt-Atp6	9.1903e-167	0.939445	0.56	0.355	1.83806e-163
Scn7a	3.57928e-165	-0.631012	0.124	0.361	7.15855e-162
Nr4a2	4.32955e-164	0.457514	0.461	0.256	8.65909e-161
Adamts4	5.85638e-164	0.500809	0.491	0.286	1.17128e-160
Igf1	5.86954e-164	-0.73047	0.394	0.543	1.17391e-160
Fndc1	1.01965e-163	-0.948432	0.224	0.404	2.0393e-160
Phlda1	9.67146e-162	1.24593	0.692	0.534	1.93429e-158
Lbp	7.49023e-161	-0.695826	0.117	0.395	1.49805e-157
Filip1l	2.64869e-155	1.05281	0.569	0.375	5.29738e-152
Scd1	6.09487e-155	-0.975709	0.393	0.526	1.21897e-151
mt-Co3	1.32373e-154	1.07383	0.537	0.318	2.64747e-151
Ugdh	2.90285e-154	-0.904282	0.306	0.449	5.80571e-151
Rcan2	7.90356e-148	0.729648	0.33	0.17	1.58071e-144
mt-Co2	4.2405e-147	0.557041	0.522	0.306	8.481e-144
Myl1	2.51318e-145	0.923537	0.419	0.205	5.02635e-142
Pdlim4	6.62477e-145	-0.534487	0.14	0.36	1.32495e-141
H2-M9	3.24532e-144	0.501355	0.235	0.012	6.49063e-141
Sorbs1	1.29241e-142	0.823293	0.468	0.236	2.58483e-139
Alpl	2.11289e-142	0.846276	0.473	0.263	4.22578e-139
Sh3bgrl3	3.45625e-141	-0.861047	0.579	0.673	6.91249e-138
Ednrb	5.20572e-141	0.763668	0.419	0.126	1.04114e-137
Inhba	1.09149e-140	0.35114	0.27	0.093	2.18299e-137
Vwa1	1.3511e-139	-0.56728	0.16	0.308	2.70221e-136
Slc25a5	2.04227e-137	0.393348	0.772	0.599	4.08454e-134
Apoe	9.81438e-137	-1.90545	0.492	0.586	1.96288e-133
Scara5	1.09417e-135	-0.951059	0.245	0.409	2.18833e-132
H2-Q7	1.74246e-135	-0.79166	0.414	0.531	3.48492e-132
Dmkn	5.48788e-135	-0.748135	0.048	0.264	1.09758e-131
Tmem119	2.75318e-132	-0.416132	0.085	0.31	5.50637e-129
Kcnk3	4.21017e-132	0.916952	0.449	0.196	8.42034e-129
Timp1	8.67393e-132	-1.21473	0.286	0.423	1.73479e-128
Carmn	1.86212e-131	1.25174	0.435	0.174	3.72423e-128
F3	4.26455e-130	-1.02895	0.359	0.472	8.5291e-127
Fbln1	1.34766e-129	-0.854146	0.191	0.344	2.69532e-126
Smoc2	4.30976e-128	-1.65955	0.326	0.436	8.61952e-125
Atf3	1.49574e-127	0.700158	0.693	0.51	2.99148e-124
Apold1	1.67102e-127	0.51403	0.473	0.234	3.34204e-124
Vcam1	2.55763e-126	-0.608108	0.287	0.414	5.11525e-123
Suclg1	2.69856e-126	0.454575	0.659	0.49	5.39712e-123
mt-Nd4	2.88709e-126	0.770387	0.601	0.438	5.77418e-123
Enpp2	1.27679e-124	-0.479024	0.316	0.451	2.55358e-121
P2rx1	1.17857e-122	0.989667	0.28	0.055	2.35713e-119
Cystm1	9.2202e-122	1.03863	0.471	0.255	1.84404e-118
Cox8a	2.19315e-121	0.504939	0.769	0.667	4.3863e-118
Calr	5.43953e-121	-0.680306	0.687	0.73	1.08791e-117
Gpm6b	2.55745e-120	-0.818742	0.25	0.424	5.11491e-117
Vstm4	4.48447e-120	1.20803	0.448	0.214	8.96895e-117
Mamdc2	8.74458e-120	1.02708	0.393	0.086	1.74892e-116
Hsp90b1	1.60203e-119	-0.52112	0.654	0.729	3.20406e-116
Lsp1	4.8792e-119	-0.7605	0.273	0.395	9.75841e-116
Grip2	1.45336e-117	0.414549	0.218	0.065	2.90672e-114
Actn1	2.86267e-117	0.778158	0.446	0.241	5.72535e-114
Phgdh	1.0725e-116	-0.313786	0.29	0.391	2.145e-113
Pcolce2	4.84563e-115	-1.18805	0.283	0.417	9.69126e-112
Palld	2.13776e-113	0.911772	0.465	0.296	4.27553e-110
Nnmt	3.29306e-113	-0.401689	0.42	0.539	6.58613e-110
Nr2f2	8.6229e-113	0.905879	0.452	0.231	1.72458e-109
Rrad	1.91843e-112	1.03418	0.479	0.295	3.83686e-109
S1pr3	5.20607e-112	1.06035	0.497	0.301	1.04121e-108
Ldhb	3.11833e-111	0.982777	0.582	0.454	6.23667e-108
Lbh	1.52279e-110	1.022	0.489	0.324	3.04558e-107
Zfp36	6.96371e-110	0.333449	0.733	0.558	1.39274e-106
Mmp3	9.95311e-109	-0.971435	0.136	0.272	1.99062e-105
Ramp1	4.43445e-108	0.422459	0.384	0.192	8.8689e-105
Pcsk6	1.0217e-105	-0.820468	0.156	0.35	2.0434e-102
BC028528	1.03448e-105	0.439007	0.443	0.261	2.06896e-102
Plac8	1.97617e-105	-1.18692	0.269	0.393	3.95233e-102
Cyyr1	2.30465e-105	-0.314686	0.476	0.277	4.6093e-102
Aldoa	2.94679e-105	0.428615	0.778	0.655	5.89358e-102
Anxa2	2.15568e-104	-0.677093	0.637	0.681	4.31137e-101
Angpt2	8.86808e-103	0.414458	0.323	0.082	1.77362e-99
Manf	1.56905e-102	-0.44219	0.472	0.59	3.1381e-99
Ccdc3	3.21475e-101	0.927447	0.409	0.159	6.42949e-98
Atp5a1	6.75415e-101	0.37353	0.749	0.624	1.35083e-97
Mt2	1.75927e-100	-1.13393	0.472	0.556	3.51854e-97
Fdps	6.24469e-99	0.287575	0.519	0.361	1.24894e-95
Mdh1	4.61979e-98	0.373035	0.653	0.5	9.23959e-95
Cxcl13	4.65959e-98	-1.63535	0.221	0.351	9.31919e-95
Lgals3	5.96255e-98	-0.612284	0.18	0.303	1.19251e-94
Pdzd2	2.28663e-97	0.817036	0.491	0.305	4.57326e-94
Uqcrb	4.86293e-97	0.37181	0.741	0.587	9.72585e-94
Dlk1	8.01187e-96	1.37645	0.415	0.204	1.60237e-92
Fscn1	1.16392e-95	-0.502173	0.316	0.43	2.32784e-92
Sfrp1	2.11304e-95	-0.701055	0.184	0.361	4.22607e-92
Bmper	1.18103e-93	-0.710424	0.337	0.432	2.36206e-90
Atp1b1	3.94658e-93	0.963858	0.397	0.19	7.89316e-90
Itm2a	4.39662e-93	-0.71111	0.287	0.398	8.79325e-90
Abi3bp	6.23348e-93	-0.839061	0.263	0.39	1.2467e-89
Fam110a	1.10702e-92	1.04339	0.412	0.193	2.21404e-89
Mdk	9.64695e-92	-0.443673	0.194	0.308	1.92939e-88
Msmo1	2.17633e-90	0.416798	0.446	0.286	4.35267e-87
Cxcl16	3.23142e-89	-0.458472	0.199	0.342	6.46285e-86
Jph2	8.55219e-88	0.482026	0.226	0.006	1.71044e-84
Cxcl14	5.76028e-87	-1.74544	0.372	0.453	1.15206e-83
Slc1a3	1.28351e-86	-0.326983	0.092	0.291	2.56702e-83
Pln	5.71068e-86	0.874455	0.213	0.031	1.14214e-82
Apobec3	6.61674e-85	-0.346924	0.194	0.318	1.32335e-81
Nme1	2.8826e-84	-0.527802	0.543	0.615	5.76519e-81
Podn	7.45387e-82	-0.485119	0.208	0.302	1.49077e-78
Fxyd6	1.1947e-80	-0.260154	0.042	0.226	2.38939e-77
Uqcrc1	1.41396e-80	0.291362	0.681	0.54	2.82792e-77
Uqcrc2	2.51653e-80	0.251579	0.606	0.451	5.03307e-77
Ndufa4	3.12963e-79	-0.429334	0.574	0.664	6.25925e-76
Net1	7.68239e-79	0.392319	0.359	0.195	1.53648e-75
Col14a1	1.12399e-77	-1.07916	0.314	0.397	2.24797e-74
Npm1	1.4339e-75	-0.540506	0.609	0.679	2.8678e-72
Mbp	4.48932e-75	-0.629654	0.301	0.198	8.97865e-72
Igfbp3	6.43385e-75	0.892465	0.413	0.229	1.28677e-71
2022-09-06	3.22609e-74	0.26422	0.429	0.268	6.45218e-71
Spon2	9.15896e-74	-0.266624	0.162	0.274	1.83179e-70
Olfml3	1.01384e-73	-0.596711	0.278	0.369	2.02769e-70
Ccl5	1.59223e-73	-0.837877	0.173	0.264	3.18445e-70
Emilin2	4.35712e-73	-0.794444	0.328	0.411	8.71423e-70
Abca8b	1.57245e-72	-0.288572	0.134	0.265	3.1449e-69
Fry	2.559e-72	0.79159	0.414	0.217	5.118e-69
Efhd2	4.27259e-72	0.624408	0.441	0.272	8.54519e-69
Orc6	3.79612e-71	0.332692	0.468	0.321	7.59224e-68
Ccl7	6.97509e-71	-1.33069	0.404	0.455	1.39502e-67
Ctsc	2.02457e-69	-0.319215	0.156	0.307	4.04915e-66
Nes	3.16256e-69	0.606189	0.435	0.223	6.32512e-66
C4b	1.19028e-67	-0.708461	0.208	0.329	2.38056e-64
Tubb4b	1.37247e-67	0.339264	0.648	0.516	2.74493e-64
Gimap4	4.03985e-67	-0.288276	0.37	0.207	8.0797e-64
Sema3g	8.72437e-66	0.287365	0.24	0.154	1.74487e-62
Cilp	1.51067e-64	-0.320827	0.268	0.174	3.02133e-61
Efhd1	1.7698e-64	-0.425707	0.123	0.244	3.53959e-61
Pi16	5.0336e-64	-2.03767	0.409	0.465	1.00672e-60
Aoc3	6.43628e-64	0.851206	0.502	0.353	1.28726e-60
Mpz	9.15189e-64	-1.02018	0.222	0.134	1.83038e-60
Gdf10	2.04035e-63	-0.636293	0.121	0.247	4.0807e-60
Cd248	6.42315e-63	-0.724767	0.438	0.5	1.28463e-59
Socs1	8.70862e-63	-0.283762	0.287	0.366	1.74172e-59
Tmem158	3.72385e-62	-0.3211	0.106	0.263	7.44771e-59
Rgcc	4.84405e-62	-1.19643	0.521	0.587	9.6881e-59
Ppm1l	7.2325e-62	0.481714	0.271	0.133	1.4465e-58
Cnn2	9.87736e-62	0.597739	0.472	0.306	1.97547e-58
Ndufs2	1.89991e-61	0.369127	0.634	0.529	3.79983e-58
Tubb6	3.09135e-61	-0.428855	0.311	0.404	6.18269e-58
Meox1	5.76201e-60	-0.518468	0.182	0.322	1.1524e-56
Hspb6	2.77483e-59	0.640344	0.369	0.169	5.54966e-56
Csrp2	1.07814e-58	0.415355	0.606	0.483	2.15627e-55
Ptgs2	3.12947e-58	-0.400978	0.127	0.26	6.25894e-55
Ngfr	3.8244e-58	0.481913	0.253	0.103	7.6488e-55
Ndufs7	4.69627e-56	0.323067	0.658	0.556	9.39254e-53
Fgf1	6.20072e-55	0.516632	0.337	0.119	1.24014e-51
mt-Co1	8.54961e-55	0.580835	0.559	0.429	1.70992e-51
Cbfa2t3	1.23499e-54	0.731005	0.421	0.228	2.46999e-51
Rgs2	1.44245e-54	-0.454908	0.416	0.294	2.88491e-51
Fbln7	2.05387e-54	-0.682113	0.264	0.345	4.10774e-51
Sfrp2	5.71966e-54	-1.36893	0.331	0.398	1.14393e-50
Il34	8.02985e-54	0.780036	0.394	0.216	1.60597e-50
Gas7	1.96536e-53	-0.532854	0.16	0.299	3.93073e-50
Vdac1	1.2254e-52	0.320239	0.555	0.429	2.45079e-49
Mest	1.38993e-52	-0.268936	0.108	0.31	2.77986e-49
Cd55	9.19931e-52	-0.8148	0.33	0.38	1.83986e-48
Fabp4	2.4797e-51	-0.559448	0.743	0.508	4.9594e-48
Kdr	1.05931e-50	-0.694879	0.552	0.44	2.11862e-47
Casq2	2.45912e-50	0.842486	0.335	0.027	4.91825e-47
Cxcl10	7.83132e-50	-0.721327	0.294	0.386	1.56626e-46
Gpc3	7.8704e-50	-0.3661	0.317	0.357	1.57408e-46
Sult5a1	8.17022e-50	-0.595525	0.279	0.332	1.63404e-46
Fkbp11	1.34721e-49	-0.648355	0.323	0.405	2.69442e-46
Errfi1	1.64146e-49	0.534511	0.563	0.448	3.28292e-46
Kdelr2	2.7908e-49	-0.437444	0.412	0.475	5.58159e-46
Nhp2	3.75594e-49	-0.251618	0.397	0.468	7.51189e-46
Cxcl1	7.68863e-49	-0.786927	0.552	0.573	1.53773e-45
Iigp1	6.2301e-48	-0.497296	0.427	0.489	1.24602e-44
Lmcd1	1.83569e-47	0.448765	0.386	0.193	3.67139e-44
Sema3c	2.82609e-46	-0.797367	0.146	0.321	5.65219e-43
Ecm1	1.04421e-45	-0.341344	0.411	0.467	2.08843e-42
Srgn	1.75132e-45	-0.643002	0.383	0.444	3.50263e-42
Car2	6.16608e-45	0.444418	0.359	0.166	1.23322e-41
Cfd	8.77935e-45	-0.873261	0.423	0.3	1.75587e-41
Fgf10	3.14702e-44	-0.396876	0.179	0.328	6.29405e-41
Pclaf	3.41715e-44	-0.374472	0.247	0.32	6.83431e-41
Prnp	1.12199e-43	-0.693316	0.357	0.41	2.24398e-40
Gm12002	1.17221e-43	-0.271823	0.255	0.12	2.34441e-40
Cebpa	2.02999e-43	-0.258848	0.321	0.376	4.05997e-40
Apod	1.70086e-41	-1.36056	0.387	0.433	3.40173e-38
Cyr61	1.70526e-41	0.32305	0.6	0.475	3.41052e-38
Myoc	3.11856e-40	-0.331887	0.01	0.216	6.23712e-37
Pparg	4.90553e-40	0.452269	0.526	0.433	9.81107e-37
Irf7	6.92371e-40	-0.538711	0.38	0.428	1.38474e-36
Mt1	9.87455e-40	-0.872403	0.615	0.614	1.97491e-36
Synm	1.01972e-39	0.355435	0.357	0.268	2.03945e-36
Kcnab1	1.49269e-38	0.308591	0.245	0.102	2.98539e-35
Plpp1	1.9269e-38	-0.486953	0.413	0.475	3.85381e-35
Dbp	2.01228e-38	0.614532	0.411	0.251	4.02456e-35
Pecam1	3.08092e-38	-0.379267	0.492	0.355	6.16185e-35
Cd59a	3.53464e-38	0.254852	0.346	0.18	7.06928e-35
Aplnr	9.44041e-38	-0.393055	0.324	0.22	1.88808e-34
Srm	1.78254e-37	-0.344402	0.399	0.449	3.56509e-34
Tspan15	1.78296e-37	0.767909	0.418	0.242	3.56593e-34
Nts	3.09818e-37	-0.257734	0.222	0.113	6.19635e-34
Adh1	4.73831e-37	-0.307642	0.382	0.263	9.47662e-34
Spry2	7.4166e-37	0.303437	0.235	0.257	1.48332e-33
Ctsk	1.60769e-36	-0.633653	0.43	0.454	3.21538e-33
Gfpt2	2.78035e-36	-0.635897	0.321	0.363	5.56071e-33
Lrrc59	1.29742e-35	-0.308022	0.354	0.402	2.59483e-32
Ccl8	2.17022e-35	-0.528184	0.139	0.257	4.34044e-32
Angptl1	6.75845e-35	-0.706346	0.246	0.339	1.35169e-31
Eif4ebp1	3.81801e-34	-0.34225	0.5	0.543	7.63603e-31
Adgrl4	4.48378e-34	-0.426688	0.451	0.325	8.96756e-31
Sdf2l1	5.66304e-34	-0.337735	0.325	0.367	1.13261e-30
Naaa	1.01518e-33	-0.367763	0.297	0.342	2.03036e-30
Crim1	1.80363e-33	0.704707	0.393	0.23	3.60727e-30
Svopl	2.44373e-33	0.82216	0.232	0.067	4.88746e-30
Cryab	7.98421e-33	0.463951	0.471	0.372	1.59684e-29
Ass1	1.08823e-32	0.808146	0.37	0.282	2.17645e-29
Fst	1.52661e-32	-0.365538	0.475	0.509	3.05321e-29
Cd74	2.54033e-32	-1.50448	0.335	0.249	5.08066e-29
Cxcl2	4.76193e-32	-0.311695	0.166	0.246	9.52386e-29
Egfl7	3.72219e-31	-0.601989	0.431	0.501	7.44437e-28
Gm13861	9.24725e-31	0.535809	0.272	0.023	1.84945e-27
Ccl2	1.83104e-30	-0.950035	0.405	0.418	3.66209e-27
Gas1	4.10687e-30	0.729405	0.516	0.414	8.21374e-27
Plk2	4.76839e-30	-0.269793	0.512	0.39	9.53677e-27
Emcn	6.10081e-30	-0.363032	0.475	0.359	1.22016e-26
Ptx3	6.82975e-30	-0.577487	0.303	0.356	1.36595e-26
Ifit1	7.36335e-30	-0.333162	0.32	0.366	1.47267e-26
Pnpla2	1.03019e-28	0.624898	0.503	0.433	2.06037e-25
Tppp3	3.70002e-28	-0.332835	0.514	0.537	7.40004e-25
Adam12	3.74903e-28	-0.338563	0.299	0.357	7.49806e-25
Cdkn2d	3.13985e-27	0.296582	0.407	0.294	6.27971e-24
Sh3bgr	6.03901e-27	0.335122	0.205	0.072	1.2078e-23
Kcna5	1.77297e-26	0.581401	0.323	0.081	3.54595e-23
Irf8	7.43004e-26	-0.261396	0.25	0.248	1.48601e-22
Psmb9	1.26161e-25	-0.376413	0.443	0.476	2.52322e-22
Cdca3	1.69015e-25	-0.252155	0.216	0.265	3.38029e-22
Clec1a	1.70952e-25	-0.323431	0.318	0.241	3.41904e-22
Wtip	6.08295e-25	0.740679	0.322	0.155	1.21659e-21
Col8a1	1.22199e-24	0.609359	0.407	0.252	2.44398e-21
Ppa1	1.22252e-24	-0.411358	0.453	0.468	2.44505e-21
Gas6	1.67352e-24	-0.419627	0.337	0.362	3.34703e-21
Rbp1	8.84954e-24	-0.646979	0.32	0.357	1.76991e-20
Saa3	2.98168e-23	-1.0743	0.315	0.323	5.96335e-20
Ehd4	3.17114e-23	0.315327	0.361	0.237	6.34229e-20
Cavin2	4.22963e-23	-0.339406	0.612	0.51	8.45927e-20
Ighm	9.38464e-23	-0.266025	0.138	0.24	1.87693e-19
Thrsp	1.23593e-22	-0.487687	0.499	0.4	2.47186e-19
Osr1	2.12782e-22	-0.438491	0.185	0.23	4.25565e-19
Anxa3	2.19669e-22	-0.735134	0.461	0.47	4.39339e-19
Icam1	3.65479e-22	-0.585943	0.344	0.371	7.30958e-19
Tcim	4.69799e-22	-0.408975	0.345	0.373	9.39599e-19
Lrg1	1.70685e-21	-0.420063	0.356	0.288	3.41371e-18
Oasl2	2.09604e-21	-0.311019	0.28	0.336	4.19209e-18
Gbp2	1.09751e-20	-0.262183	0.338	0.356	2.19501e-17
Tuba1c	1.39498e-20	0.398491	0.341	0.238	2.78995e-17
Lrrn4cl	1.76535e-20	-0.64182	0.307	0.327	3.53069e-17
Emb	5.22247e-20	0.259521	0.357	0.212	1.04449e-16
Mfap4	9.91912e-20	-0.525243	0.072	0.242	1.98382e-16
Adm	1.59173e-19	-0.333827	0.384	0.286	3.18346e-16
Il1r2	1.84776e-19	-0.50939	0.076	0.226	3.69553e-16
Kank3	2.58957e-19	-0.466391	0.381	0.293	5.17913e-16
Top2a	5.02369e-19	-0.325388	0.312	0.216	1.00474e-15
Tubb2b	7.47804e-19	-0.257589	0.203	0.261	1.49561e-15
Arxes2	1.36469e-18	-0.28182	0.243	0.339	2.72937e-15
Crispld2	8.54284e-18	0.346179	0.426	0.3	1.70857e-14
Ucp1	1.78925e-17	-0.495779	0.464	0.369	3.57851e-14
Tmem176a	1.84743e-17	-0.601772	0.478	0.484	3.69486e-14
Cldn5	3.58925e-17	-0.295877	0.519	0.459	7.1785e-14
Rbp4	6.08501e-17	-0.639649	0.333	0.395	1.217e-13
Rasip1	1.3387e-16	-0.367987	0.267	0.307	2.6774e-13
Parm1	8.10878e-16	0.812038	0.356	0.163	1.62176e-12
Inmt	9.21983e-16	-0.904865	0.27	0.279	1.84397e-12
Plvap	1.20769e-15	-0.480843	0.263	0.321	2.41538e-12
Nnat	1.76637e-15	-0.654317	0.382	0.377	3.53275e-12
Gm13889	5.71162e-15	0.687473	0.347	0.186	1.14232e-11
Lox	1.28939e-14	-0.39583	0.312	0.33	2.57879e-11
Aqp1	2.50881e-14	-1.02572	0.495	0.449	5.01761e-11
Ak2	4.18891e-14	-0.399598	0.41	0.419	8.37782e-11
Cnp	5.02008e-14	-0.296427	0.224	0.226	1.00402e-10
Aqp7	6.27055e-14	-0.433187	0.306	0.322	1.25411e-10
Cdh5	8.74306e-14	-0.478702	0.495	0.445	1.74861e-10
Sgk1	2.38053e-13	-0.622476	0.432	0.442	4.76105e-10
Palmd	4.77907e-13	-0.390935	0.353	0.265	9.55814e-10
Nexn	8.31088e-13	0.689827	0.255	0.176	1.66218e-09
H2-Ab1	1.01546e-12	-0.988186	0.296	0.28	2.03092e-09
Sbsn	2.18588e-12	-1.09655	0.362	0.367	4.37176e-09
Ldb3	9.94275e-12	0.537614	0.228	0.044	1.98855e-08
Zbp1	1.34414e-11	-0.454862	0.214	0.326	2.68827e-08
Npy1r	1.65448e-11	0.406376	0.276	0.16	3.30897e-08
Ppp1r12b	2.52249e-11	1.06016	0.363	0.245	5.04498e-08
C2	6.04262e-11	-0.389261	0.158	0.259	1.20852e-07
Ces1d	6.20121e-11	-0.341206	0.481	0.396	1.24024e-07
Tmem176b	1.25987e-10	-0.649638	0.588	0.558	2.51973e-07
1810011H11Rik	2.17297e-10	0.445216	0.212	0.021	4.34595e-07
Eif5a	6.33958e-10	-0.260099	0.728	0.695	1.26792e-06
Adipoq	8.50413e-10	-0.721755	0.379	0.386	1.70083e-06
Apoc1	8.58118e-10	-0.338451	0.425	0.34	1.71624e-06
Tmem120a	1.39297e-09	-0.257719	0.382	0.377	2.78595e-06
Dpp4	4.40229e-09	-0.571202	0.24	0.276	8.80458e-06
Clec11a	5.88456e-09	-0.460672	0.239	0.232	1.17691e-05
Tspan13	8.00861e-09	-0.696644	0.513	0.454	1.60172e-05
Lsamp	1.04729e-08	-0.273492	0.072	0.203	2.09458e-05
Pck1	3.08976e-08	-0.29341	0.408	0.342	6.17952e-05
Sned1	1.20137e-07	-0.377193	0.42	0.323	0.000240275
H2afz	1.2924e-07	-0.392019	0.656	0.573	0.000258481
Il6	1.86181e-07	-0.290868	0.325	0.31	0.000372363
C1qtnf9	2.0274e-07	-0.538944	0.399	0.346	0.00040548
Cd36	6.17921e-07	-0.446078	0.627	0.565	0.00123584
Cks2	7.70535e-07	-0.301643	0.433	0.364	0.00154107
Cidea	1.02769e-06	-0.342387	0.477	0.413	0.00205538
Rgs7bp	1.05538e-06	0.758444	0.235	0.097	0.00211076
Vegfd	1.57051e-06	-0.456654	0.354	0.332	0.00314102
Tnfaip3	2.03642e-06	-0.307715	0.26	0.266	0.00407285
Atp1a2	2.66365e-06	0.329951	0.424	0.367	0.0053273
Car3	3.36872e-06	-2.05284	0.445	0.376	0.00673743
Lpar6	4.53356e-06	-0.433082	0.404	0.331	0.00906712
Cdkn1c	4.58325e-06	-0.610254	0.464	0.446	0.00916649
Hspe1	5.08214e-06	-0.420557	0.625	0.598	0.0101643
Tie1	8.38684e-06	-0.255849	0.345	0.27	0.0167737
Hmox1	1.50163e-05	-0.354167	0.375	0.353	0.0300326
Creb5	1.54787e-05	-0.538921	0.337	0.316	0.0309575
Ndrg1	1.64674e-05	-0.437853	0.361	0.35	0.0329347
Hp	2.38614e-05	-0.679322	0.475	0.415	0.0477227
Opcml	2.88313e-05	-0.293538	0.22	0.196	0.0576625
Gpd1	5.35272e-05	-0.415969	0.406	0.403	0.107054
Ecscr	5.90804e-05	-0.388439	0.347	0.372	0.118161
Synpo2	0.000126534	0.868612	0.331	0.172	0.253068
Trim30a	0.000210349	-0.385274	0.356	0.32	0.420699
Agpat2	0.000257079	-0.334634	0.479	0.432	0.514158
Ppargc1b	0.000257991	0.261785	0.272	0.174	0.515983
Cox8b	0.000381009	-0.411545	0.384	0.314	0.762018
Itga6	0.000407668	-0.261057	0.367	0.265	0.815336
Spry1	0.000933241	0.258265	0.291	0.255	1
Rab7b	0.00100869	-0.343014	0.095	0.229	1
Cks1b	0.0011772	-0.285635	0.462	0.435	1
Stmn1	0.00123673	-0.612559	0.389	0.372	1
Ube2c	0.00188006	-0.272556	0.259	0.27	1
Hspd1	0.0034206	-0.386692	0.479	0.462	1
Myct1	0.0035153	-0.453647	0.353	0.316	1
Ushbp1	0.00411848	-0.451552	0.394	0.354	1
Ctla2a	0.00463896	-0.751946	0.344	0.338	1
Sfrp4	0.00629591	-0.687253	0.25	0.239	1
Dbi	0.00890302	-0.496109	0.677	0.589	1
Prg4	0.0130029	-0.493878	0.138	0.206	1
Pim1	0.0137253	-0.480369	0.357	0.311	1
Ctgf	0.0148186	0.267662	0.245	0.183	1
Serpine1	0.0148454	0.331195	0.361	0.324	1
Ace	0.0207216	-0.693769	0.433	0.383	1
Ran	0.023592	-0.311447	0.651	0.612	1
Il33	0.0268568	-0.465008	0.246	0.266	1
Pde4b	0.0272883	0.447593	0.352	0.275	1
Serpinb1a	0.0279903	-0.259182	0.258	0.276	1
Hbb-bs	0.0343296	-0.662455	0.295	0.23	1
Btnl9	0.044871	-0.461129	0.409	0.356	1
Acp5	0.0594962	-0.297815	0.24	0.299	1
Serpina3n	0.0698325	-0.440609	0.254	0.264	1
Cd300lg	0.0737185	-0.835707	0.452	0.425	1
Rassf4	0.092946	0.350357	0.263	0.082	1
Car4	0.0954964	-0.838888	0.441	0.391	1
Cebpd	0.106362	-0.366673	0.653	0.566	1
H2-Eb1	0.108587	-0.742996	0.313	0.289	1
Rsad2	0.121862	-0.503632	0.374	0.346	1
Fabp5	0.129851	-1.27259	0.536	0.485	1
Hsd11b1	0.130889	-0.776022	0.356	0.313	1
Pgf	0.133192	0.416613	0.215	0.176	1
H2-Q10	0.139524	-0.303637	0.322	0.313	1
Mrap	0.152827	-0.272234	0.4	0.357	1
Has1	0.174697	-0.543801	0.261	0.275	1
Thbs2	0.195473	-0.356959	0.369	0.322	1
Bgn	0.20492	-0.295364	0.703	0.605	1
Col18a1	0.237427	0.324032	0.44	0.409	1
Gpihbp1	0.263546	-1.17879	0.537	0.547	1
H2-Q6	0.303849	-0.361792	0.451	0.393	1
H2-Aa	0.35728	-1.03188	0.299	0.237	1
Birc5	0.493162	-0.402573	0.337	0.316	1
Trf	0.521302	-0.499995	0.316	0.335	1
Mgll	0.524038	-0.528469	0.558	0.518	1
Cd44	0.555695	-0.35671	0.322	0.31	1
Cdkn1a	0.65494	-0.325167	0.543	0.498	1
Cd9	0.656382	-0.254739	0.499	0.46	1
Hspb2	0.744779	0.7644	0.254	0.148	1
Flrt2	0.845053	-0.460522	0.155	0.252	1
Fgl2	0.970585	-0.382988	0.212	0.275	1
Retn	0.993848	-0.280031	0.361	0.325	1

## Sheet: VEC
	p_val	avg_logFC	pct.1	pct.2	p_val_adj
Gpihbp1	0	3.13039	0.887	0.457	0
Fabp4	0	2.75418	0.989	0.403	0
Cd36	0	2.749	0.924	0.476	0
Aqp1	0	2.68743	0.558	0.425	0
Cldn5	0	2.47855	0.66	0.411	0
Egfl7	0	2.45803	0.75	0.429	0
Cavin2	0	2.42585	0.83	0.435	0
Tm4sf1	0	2.42092	0.779	0.417	0
Cd300lg	0	2.33895	0.687	0.358	0
Kdr	0	2.29942	0.67	0.389	0
Cdh5	0	2.2749	0.684	0.386	0
Tspan13	0	2.2698	0.695	0.395	0
Rgcc	0	2.19769	0.822	0.518	0
Flt1	0	2.19405	0.645	0.371	0
Id1	0	2.16357	0.69	0.481	0
Rbp7	0	2.15945	0.531	0.347	0
Mgll	0	2.15055	0.784	0.451	0
Btnl9	0	2.09601	0.588	0.299	0
Car4	0	2.08295	0.563	0.35	0
Tcf15	0	2.06057	0.594	0.393	0
Pecam1	0	2.03308	0.616	0.298	0
Cav1	0	2.0115	0.787	0.504	0
Emcn	0	2.00101	0.556	0.318	0
Ptprb	0	1.94638	0.534	0.276	0
Hspb1	0	1.9028	0.815	0.509	0
Sox18	0	1.86723	0.488	0.318	0
Esam	0	1.84417	0.625	0.377	0
8430408G22Rik	0	1.83528	0.402	0.261	0
C1qtnf9	0	1.79771	0.48	0.315	0
Ushbp1	0	1.78427	0.51	0.317	0
Slc9a3r2	0	1.78368	0.623	0.4	0
Cyyr1	0	1.78355	0.499	0.237	0
Icam2	0	1.76988	0.498	0.304	0
Cd93	0	1.76019	0.513	0.281	0
Cav2	0	1.75854	0.534	0.341	0
Slc6a6	0	1.73639	0.512	0.334	0
Tcim	0	1.73632	0.476	0.343	0
Rflnb	0	1.73499	0.497	0.375	0
Adgrf5	0	1.70387	0.51	0.355	0
Myct1	0	1.70329	0.451	0.284	0
Ctla2a	0	1.7007	0.488	0.298	0
Hspa1a	0	1.69999	0.603	0.496	0
Gng11	0	1.6871	0.755	0.532	0
Adgrl4	0	1.67538	0.464	0.299	0
Sgk1	0	1.65689	0.56	0.409	0
Aqp7	0	1.63724	0.463	0.283	0
Cd200	0	1.58904	0.49	0.313	0
Cdkn1c	0	1.57288	0.558	0.418	0
Kank3	0	1.57174	0.433	0.264	0
Klf2	0	1.56955	0.743	0.49	0
Kitl	0	1.52272	0.483	0.292	0
Ecscr	0	1.50683	0.493	0.337	0
Srgn	0	1.4748	0.6	0.397	0
Apold1	0	1.46764	0.389	0.215	0
Tspan7	0	1.45962	0.429	0.34	0
Gimap6	0	1.45802	0.456	0.289	0
S1pr1	0	1.45412	0.382	0.221	0
Fabp5	0	1.45348	0.744	0.421	0
Tinagl1	0	1.4437	0.539	0.331	0
Itga6	0	1.4159	0.408	0.236	0
Plk2	0	1.39854	0.441	0.388	0
Eng	0	1.37101	0.511	0.394	0
Lpar6	0	1.36485	0.396	0.32	0
Rsad2	0	1.3531	0.427	0.327	0
Mmrn2	0	1.34077	0.362	0.237	0
Thrsp	0	1.33009	0.554	0.368	0
Epas1	0	1.30668	0.453	0.369	0
Aplnr	0	1.24885	0.344	0.197	0
Cdh13	0	1.23307	0.367	0.263	0
Cidea	0	1.22231	0.515	0.392	0
Clic5	0	1.15971	0.345	0.175	0
mt-Nd5	0	1.15835	0.556	0.524	0
Ucp1	0	1.14982	0.543	0.332	0
Tmsb4x	0	1.13152	0.951	0.615	0
Grrp1	0	1.1274	0.31	0.124	0
Itga1	0	1.07653	0.422	0.326	0
Rasgrp3	0	1.07624	0.321	0.163	0
Gm12002	0	1.04609	0.305	0.084	0
Cox8b	0	1.04381	0.425	0.291	0
Cxcl12	0	1.04077	0.626	0.551	0
Cyp1a1	0	1.0377	0.276	0.087	0
Chchd10	0	0.978888	0.559	0.368	0
Slc26a10	0	0.945828	0.283	0.13	0
Nepn	0	0.854189	0.247	0.066	0
Cox5a	0	0.67874	0.607	0.533	0
Gm42418	0	0.561344	0.882	0.743	0
Cfd	0	0.383259	0.452	0.27	0
Dstn	0	-0.253399	0.276	0.607	0
Ccnb2	0	-0.254574	0.035	0.327	0
Anp32b	0	-0.256005	0.302	0.673	0
Psat1	0	-0.25804	0.051	0.363	0
Ube2s	0	-0.269108	0.28	0.609	0
Grb14	0	-0.271664	0.08	0.352	0
Apex1	0	-0.273201	0.119	0.413	0
Naa50	0	-0.279097	0.207	0.512	0
Ranbp1	0	-0.288948	0.306	0.646	0
Sdc1	0	-0.30133	0.037	0.414	0
Lrrc59	0	-0.30556	0.151	0.464	0
Fdps	0	-0.308661	0.101	0.444	0
Hmgn2	0	-0.309507	0.172	0.456	0
Ighm	0	-0.319971	0.003	0.293	0
C1qbp	0	-0.334177	0.18	0.493	0
Selenoh	0	-0.334617	0.155	0.496	0
Nop58	0	-0.344193	0.174	0.505	0
Siva1	0	-0.360707	0.152	0.501	0
Dtymk	0	-0.363565	0.156	0.5	0
Nhp2	0	-0.371271	0.16	0.543	0
Slc1a3	0	-0.401364	0.033	0.341	0
Manf	0	-0.409389	0.255	0.667	0
Nnmt	0	-0.410279	0.27	0.599	0
Nme1	0	-0.412185	0.318	0.687	0
Cks2	0	-0.416806	0.148	0.428	0
Cebpd	0	-0.41691	0.314	0.641	0
Vcam1	0	-0.420896	0.13	0.478	0
Scd2	0	-0.421554	0.244	0.52	0
Adam12	0	-0.424528	0.079	0.426	0
Eif5a	0	-0.425523	0.426	0.769	0
Eif4ebp1	0	-0.427334	0.261	0.613	0
Dlk1	0	-0.429827	0.007	0.275	0
Ran	0	-0.433111	0.365	0.681	0
S1pr3	0	-0.455093	0.062	0.382	0
Hspe1	0	-0.460739	0.365	0.662	0
Ptgis	0	-0.471078	0.039	0.365	0
Thbs1	0	-0.474662	0.111	0.385	0
Zbp1	0	-0.478063	0.069	0.384	0
Col18a1	0	-0.484471	0.134	0.484	0
Cebpb	0	-0.486195	0.352	0.647	0
Kdelr2	0	-0.498675	0.175	0.549	0
Fgf10	0	-0.504115	0.022	0.395	0
Mfge8	0	-0.505163	0.243	0.588	0
Hspa5	0	-0.51382	0.456	0.802	0
Lypd1	0	-0.518954	0.071	0.367	0
Lox	0	-0.521162	0.077	0.396	0
Npm3	0	-0.525831	0.131	0.509	0
Flna	0	-0.542869	0.143	0.463	0
Pdlim4	0	-0.566877	0.065	0.418	0
Tmem176a	0	-0.572074	0.235	0.55	0
Npm1	0	-0.576706	0.385	0.75	0
Mafb	0	-0.581828	0.209	0.504	0
Phgdh	0	-0.583569	0.088	0.462	0
Notch3	0	-0.587775	0.028	0.341	0
Gas7	0	-0.596534	0.02	0.36	0
Tmem176b	0	-0.599711	0.312	0.626	0
Csrp2	0	-0.619279	0.195	0.571	0
Ace	0	-0.624452	0.144	0.45	0
Tmem100	0	-0.636449	0.064	0.373	0
S100a10	0	-0.643	0.541	0.776	0
Aoc3	0	-0.658695	0.038	0.45	0
Anxa2	0	-0.686115	0.369	0.76	0
Lbp	0	-0.691652	0.104	0.447	0
Srm	0	-0.694645	0.116	0.532	0
Lmna	0	-0.703169	0.213	0.667	0
Sult5a1	0	-0.711765	0.072	0.396	0
Itm2a	0	-0.718844	0.106	0.465	0
Rbp1	0	-0.722413	0.091	0.424	0
Ptx3	0	-0.724328	0.067	0.428	0
Cotl1	0	-0.724793	0.111	0.505	0
Gem	0	-0.729758	0.115	0.48	0
Fkbp11	0	-0.741952	0.135	0.469	0
Cxcl10	0	-0.743828	0.126	0.446	0
Lrrc17	0	-0.746747	0.023	0.456	0
Tubb6	0	-0.766624	0.137	0.466	0
Ifi205	0	-0.768705	0.068	0.45	0
G0s2	0	-0.777833	0.253	0.559	0
Olfml3	0	-0.780263	0.088	0.436	0
Calr	0	-0.781397	0.42	0.808	0
Gpc3	0	-0.7883	0.082	0.426	0
Cks1b	0	-0.792278	0.101	0.526	0
Nnat	0	-0.800266	0.17	0.432	0
Tgfbi	0	-0.803455	0.04	0.376	0
Npc2	0	-0.807461	0.419	0.789	0
Scn7a	0	-0.808452	0.07	0.416	0
Errfi1	0	-0.815531	0.191	0.526	0
Gfpt2	0	-0.833233	0.062	0.438	0
Sfrp1	0	-0.838264	0.066	0.423	0
Dclk1	0	-0.847294	0.052	0.463	0
Ppp1r14b	0	-0.856825	0.178	0.639	0
Bmper	0	-0.86299	0.067	0.52	0
Lsp1	0	-0.867304	0.115	0.458	0
Hsp90b1	0	-0.875221	0.369	0.818	0
Cd55	0	-0.878299	0.118	0.445	0
Fbln7	0	-0.878982	0.061	0.413	0
Crispld2	0	-0.895173	0.047	0.378	0
Procr	0	-0.895627	0.145	0.469	0
Cyp1b1	0	-0.90195	0.105	0.47	0
Basp1	0	-0.909455	0.051	0.489	0
Car3	0	-0.921043	0.462	0.36	0
Emilin2	0	-0.952364	0.09	0.489	0
Pcsk6	0	-0.956904	0.068	0.407	0
Fbln1	0	-0.993378	0.033	0.412	0
Ctsk	0	-1.0311	0.12	0.54	0
Tppp3	0	-1.03898	0.228	0.617	0
Gpm6b	0	-1.04646	0.098	0.494	0
Abi3bp	0	-1.05044	0.048	0.469	0
Igf1	0	-1.05783	0.174	0.627	0
Ugdh	0	-1.06625	0.153	0.515	0
H2-Ab1	0	-1.09552	0.068	0.338	0
Enpp2	0	-1.09801	0.135	0.522	0
Nbl1	0	-1.09941	0.093	0.483	0
H2-Aa	0	-1.10114	0.044	0.293	0
Pmp22	0	-1.10819	0.15	0.656	0
Fndc1	0	-1.11645	0.049	0.482	0
Cryab	0	-1.12983	0.098	0.454	0
Cp	0	-1.13744	0.066	0.515	0
Scara5	0	-1.16088	0.11	0.473	0
Gas1	0	-1.16612	0.062	0.516	0
Cpxm1	0	-1.18326	0.12	0.569	0
Ecm1	0	-1.19006	0.132	0.551	0
Abca8a	0	-1.19487	0.121	0.518	0
Ndufa4l2	0	-1.20957	0.115	0.452	0
Phlda1	0	-1.27515	0.168	0.645	0
Tnfaip6	0	-1.29025	0.143	0.611	0
F3	0	-1.29581	0.157	0.545	0
Mt2	0	-1.29717	0.249	0.629	0
Ifi27l2a	0	-1.30343	0.428	0.693	0
Col14a1	0	-1.30585	0.109	0.466	0
Pla1a	0	-1.32436	0.08	0.551	0
Timp1	0	-1.33879	0.154	0.482	0
Sbsn	0	-1.35845	0.137	0.427	0
Cd248	0	-1.36083	0.144	0.589	0
Mt1	0	-1.36856	0.311	0.694	0
Srpx	0	-1.38455	0.123	0.599	0
Tpm2	0	-1.4242	0.101	0.439	0
Plac8	0	-1.43569	0.124	0.453	0
Pcolce2	0	-1.44335	0.12	0.483	0
Ccl2	0	-1.45277	0.121	0.495	0
Cxcl1	0	-1.50647	0.251	0.657	0
Ccl7	0	-1.54089	0.19	0.521	0
Fbn1	0	-1.54357	0.191	0.694	0
Fn1	0	-1.55753	0.18	0.619	0
Fst	0	-1.57711	0.059	0.625	0
Cd74	0	-1.60771	0.076	0.302	0
Postn	0	-1.61298	0.154	0.569	0
Anxa1	0	-1.66496	0.139	0.688	0
Apod	0	-1.71497	0.124	0.511	0
Igfbp5	0	-1.79136	0.17	0.575	0
Acta2	0	-1.79416	0.114	0.401	0
Bgn	0	-1.86147	0.213	0.717	0
Cxcl13	0	-1.87939	0.09	0.408	0
Smoc2	0	-1.94758	0.155	0.5	0
Cxcl14	0	-2.03753	0.134	0.53	0
Gpx3	0	-2.05912	0.285	0.724	0
Lum	0	-2.14243	0.222	0.674	0
Ccl11	0	-2.16872	0.172	0.687	0
Lgals1	0	-2.23684	0.319	0.835	0
Mfap5	0	-2.28674	0.223	0.675	0
Meg3	0	-2.39647	0.137	0.654	0
Pi16	0	-2.48464	0.193	0.532	0
Igfbp6	0	-2.51742	0.187	0.618	0
Clec3b	0	-2.77196	0.193	0.728	0
Col1a1	0	-3.17286	0.16	0.749	0
Dcn	0	-3.99549	0.137	0.766	0
Gsn	0	-4.36281	0.137	0.736	0
Pclaf	6.80503e-302	-0.389482	0.109	0.369	1.36101e-298
Mdk	1.53538e-300	-0.55284	0.04	0.368	3.07075e-297
Rasl11a	5.07613e-299	-0.439633	0.098	0.367	1.01523e-295
Thbs2	2.58224e-297	-0.683167	0.072	0.392	5.16449e-294
mt-Nd2	7.90099e-297	1.49112	0.385	0.268	1.5802e-293
Pdzd2	8.13748e-293	0.966167	0.365	0.307	1.6275e-289
Podn	3.38426e-291	-0.671406	0.032	0.365	6.76852e-288
Itga7	3.98289e-290	-0.272093	0.036	0.275	7.96579e-287
Palmd	1.09348e-287	1.41338	0.373	0.244	2.18695e-284
St8sia4	6.91359e-284	0.555473	0.25	0.104	1.38272e-280
Cxcl16	9.31168e-282	-0.409651	0.123	0.387	1.86234e-278
Myc	1.23116e-281	-0.46104	0.083	0.4	2.46231e-278
Cthrc1	6.38127e-275	-0.890184	0.125	0.406	1.27625e-271
Nr4a1	6.75775e-274	-0.275504	0.227	0.485	1.35155e-270
Spon1	2.95735e-273	-0.397572	0.012	0.324	5.91469e-270
Il33	1.50593e-271	-0.54628	0.03	0.327	3.01186e-268
Sema3c	8.11035e-271	-0.95339	0.075	0.37	1.62207e-267
H2-Eb1	3.99717e-269	-0.916019	0.094	0.343	7.99434e-266
Rasip1	7.53788e-267	1.46548	0.395	0.28	1.50758e-263
Ptn	3.42694e-265	-0.32346	0.015	0.226	6.85387e-262
Lbh	6.22427e-264	-0.289894	0.139	0.388	1.24485e-260
Tpm1	5.31112e-263	-0.37284	0.225	0.507	1.06222e-259
Lrrn4cl	1.20292e-262	-0.797753	0.082	0.39	2.40583e-259
Rbp4	1.68854e-262	-0.506627	0.185	0.445	3.37709e-259
Plpp1	2.17706e-259	1.16254	0.485	0.467	4.35412e-256
Timp4	1.09454e-251	1.49127	0.451	0.398	2.18908e-248
Csf2rb	1.29786e-242	0.829121	0.267	0.125	2.59573e-239
Ackr3	3.25588e-241	-0.723091	0.167	0.432	6.51176e-238
Nmb	8.83425e-240	-0.428542	0.126	0.378	1.76685e-236
Sdf2l1	1.88811e-238	-0.471917	0.147	0.421	3.77621e-235
Mki67	7.99339e-238	-0.262815	0.035	0.218	1.59868e-234
2022-09-06	1.14786e-237	-0.294948	0.057	0.339	2.29571e-234
Adamts4	6.87718e-237	-0.277564	0.101	0.353	1.37544e-233
Sox17	3.88525e-235	1.54089	0.368	0.272	7.7705e-232
Serpine1	1.40247e-234	-0.699309	0.109	0.384	2.80493e-231
Cdca3	6.24071e-233	-0.305515	0.092	0.307	1.24814e-229
Dpp4	5.68009e-232	-0.71008	0.05	0.332	1.13602e-228
Mgp	6.55531e-231	-1.21659	0.14	0.41	1.31106e-227
Ube2c	6.97229e-230	-0.318041	0.091	0.316	1.39446e-226
Mef2c	2.97186e-228	0.928582	0.354	0.307	5.94373e-225
Gm4951	6.50705e-228	-0.364128	0.076	0.352	1.30141e-224
Pdia4	9.75281e-227	-0.351021	0.206	0.483	1.95056e-223
Map3k20	8.23769e-225	-0.284407	0.104	0.36	1.64754e-221
Rrad	5.05098e-224	-0.38237	0.094	0.364	1.0102e-220
Ednrb	4.03666e-222	0.800482	0.267	0.116	8.07332e-219
Lgmn	1.59162e-220	-0.427879	0.162	0.448	3.18325e-217
Bmp5	8.77545e-217	-0.296106	0.012	0.291	1.75509e-213
Ccdc34	1.10689e-214	-0.341753	0.15	0.416	2.21378e-211
Efhd1	3.52212e-214	-0.355784	0.052	0.284	7.04423e-211
mt-Nd1	1.29643e-210	1.67385	0.445	0.375	2.59285e-207
Angptl1	4.66214e-207	-0.867884	0.103	0.393	9.32428e-204
Apoc1	1.31493e-205	0.653948	0.357	0.344	2.62986e-202
Hspd1	5.77916e-201	-0.444362	0.255	0.518	1.15583e-197
Adgrg1	1.63367e-200	1.09869	0.312	0.19	3.26735e-197
Cenpf	8.64527e-200	-0.271814	0.022	0.203	1.72905e-196
Dut	3.93815e-199	-0.285598	0.149	0.409	7.8763e-196
Hsd11b1	2.2074e-197	-0.928547	0.095	0.375	4.4148e-194
Tmem119	2.60176e-196	-0.569918	0.046	0.359	5.20353e-193
Scarb1	3.96003e-193	1.22247	0.371	0.341	7.92006e-190
Cadm3	1.48002e-191	-0.66183	0.058	0.346	2.96004e-188
Vegfd	2.2796e-189	-0.598023	0.121	0.39	4.55921e-186
Cyp4b1	9.06066e-189	0.989469	0.33	0.285	1.81213e-185
Igkc	2.10752e-187	-0.367791	0.07	0.209	4.21504e-184
Naaa	8.9528e-183	-0.611187	0.134	0.393	1.79056e-179
Ablim3	3.28262e-182	1.06555	0.316	0.211	6.56524e-179
Creb5	3.94619e-181	-0.688252	0.117	0.371	7.89238e-178
Ctsc	8.46135e-178	-0.422483	0.087	0.351	1.69227e-174
Clec1a	1.01808e-175	0.944783	0.304	0.232	2.03616e-172
Sned1	1.64196e-175	-0.591326	0.105	0.39	3.28392e-172
Myoc	2.51421e-175	-0.405748	0.011	0.252	5.02842e-172
Top2a	3.19195e-175	-0.372866	0.059	0.267	6.3839e-172
Sfrp2	6.9525e-174	-1.49501	0.212	0.441	1.3905e-170
Arhgdib	4.39735e-170	-0.448941	0.061	0.263	8.7947e-167
Birc5	5.99772e-170	-0.419059	0.154	0.361	1.19954e-166
Myl9	1.11736e-168	-1.43897	0.1	0.37	2.23472e-165
Crip1	1.58939e-166	-0.637961	0.538	0.702	3.17878e-163
Col12a1	3.46427e-165	-0.30775	0.042	0.322	6.92853e-162
Trp53i11	1.23905e-161	0.83252	0.264	0.186	2.47809e-158
Nts	5.04022e-161	0.875665	0.205	0.099	1.00804e-157
Atp1a2	6.59279e-161	-0.314699	0.191	0.419	1.31856e-157
Il6	7.47459e-161	-0.585515	0.116	0.362	1.49492e-157
C7	2.44372e-159	-0.350641	0.051	0.226	4.88744e-156
Mustn1	4.16909e-159	-0.495534	0.101	0.335	8.33819e-156
Mnd1	4.00499e-158	-0.540489	0.066	0.332	8.00999e-155
Ngf	3.58504e-154	-0.326546	0.014	0.277	7.17007e-151
Ccl5	7.40274e-152	-0.901567	0.079	0.304	1.48055e-148
Pkp4	2.2606e-150	1.02529	0.316	0.275	4.5212e-147
Spon2	5.86332e-150	-0.384457	0.062	0.32	1.17266e-146
Cystm1	4.12296e-148	-0.322395	0.07	0.323	8.24591e-145
Lpl	3.31415e-147	-0.839255	0.621	0.723	6.62829e-144
Fgl2	3.34642e-144	-0.408928	0.056	0.327	6.69283e-141
C4b	1.42726e-138	-0.803763	0.118	0.374	2.85452e-135
Cox6b1	1.44108e-135	0.645321	0.619	0.628	2.88216e-132
Gimap4	7.60234e-135	0.965574	0.294	0.199	1.52047e-131
Plagl1	3.66498e-134	-0.278638	0.059	0.316	7.32996e-131
2022-09-04	5.28909e-134	0.753395	0.416	0.41	1.05782e-130
Mbp	8.23653e-132	-0.721736	0.054	0.245	1.64731e-128
Tnfaip3	1.8672e-130	-0.338028	0.088	0.313	3.7344e-127
Pim3	4.17947e-130	1.18687	0.417	0.442	8.35893e-127
Id4	1.62149e-129	-0.371557	0.109	0.32	3.24297e-126
Tagln	5.29515e-127	-1.3513	0.126	0.34	1.05903e-123
Rassf9	8.08019e-127	0.950763	0.246	0.116	1.61604e-123
Cox7a1	5.93628e-126	0.724276	0.33	0.348	1.18726e-122
Inmt	3.54321e-125	-1.08444	0.08	0.33	7.08641e-122
Cxcl9	1.24635e-124	-0.26032	0.271	0.478	2.4927e-121
Trf	4.50531e-123	-0.553492	0.167	0.377	9.01062e-120
H2afz	6.90226e-123	-0.45598	0.406	0.625	1.38045e-119
Bst2	3.04946e-119	0.527817	0.626	0.678	6.09892e-116
Kcnj8	3.43678e-119	-0.818261	0.062	0.232	6.87356e-116
Cdc42ep3	3.61338e-119	0.788214	0.275	0.25	7.22676e-116
Hspa8	3.86176e-119	0.391242	0.752	0.782	7.72352e-116
Spry2	3.83607e-118	-0.309374	0.077	0.302	7.67215e-115
Gucy1b1	7.01855e-116	-0.431314	0.047	0.271	1.40371e-112
Agtr1a	1.49943e-115	-0.510543	0.012	0.29	2.99886e-112
Cmbl	3.35771e-115	-0.294144	0.143	0.375	6.71542e-112
Ltbp4	3.33884e-114	0.902265	0.362	0.366	6.67769e-111
Lsamp	8.96356e-112	-0.335504	0.002	0.245	1.79271e-108
Pdgfa	3.41804e-111	-0.319023	0.079	0.277	6.83608e-108
Tie1	6.51743e-111	1.22337	0.333	0.261	1.30349e-107
Ahr	1.18714e-110	0.600236	0.222	0.139	2.37428e-107
Ndrg2	3.28048e-110	-0.394729	0.166	0.387	6.56097e-107
C2	1.81355e-109	-0.526603	0.044	0.307	3.62711e-106
Smagp	7.42908e-108	1.02059	0.303	0.239	1.48582e-104
Podxl	1.6282e-107	1.32552	0.318	0.244	3.2564e-104
Tkt	6.32117e-105	0.268489	0.356	0.584	1.26423e-101
Pcsk5	1.22193e-104	-0.257242	0.057	0.303	2.44387e-101
Efnb2	3.116e-104	0.825768	0.263	0.213	6.232e-101
Mfap4	3.83034e-103	-0.588414	0.026	0.283	7.66068e-100
Crim1	1.14204e-102	0.54373	0.228	0.245	2.28409e-99
Ptgs2	2.15811e-100	-0.52646	0.062	0.3	4.31622e-97
Ndrg1	3.57628e-100	0.854907	0.347	0.352	7.15255e-97
Cilp	5.04379e-100	-0.392398	0.015	0.224	1.00876e-96
mt-Nd3	3.65955e-95	1.10257	0.404	0.421	7.3191e-92
Eva1a	1.78827e-94	0.93957	0.253	0.149	3.57655e-91
Cxcl2	3.18323e-94	-0.291523	0.08	0.283	6.36646e-91
Gucy1a1	7.60008e-93	-0.468331	0.025	0.253	1.52002e-89
mt-Co2	9.75167e-93	1.22876	0.364	0.311	1.95033e-89
Cd44	7.8754e-92	-0.416289	0.127	0.36	1.57508e-88
Higd1b	8.41586e-87	-0.402457	0.058	0.215	1.68317e-83
H2-K1	7.1765e-86	0.278903	0.73	0.773	1.4353e-82
Cox4i2	5.31141e-85	-0.473361	0.113	0.279	1.06228e-81
Bcam	1.08828e-84	0.944168	0.318	0.298	2.17657e-81
Sorbs1	2.16168e-84	0.626166	0.24	0.256	4.32336e-81
Rgs5	2.62845e-84	-0.877315	0.21	0.392	5.25691e-81
Lmo7	2.84652e-84	0.806706	0.238	0.16	5.69304e-81
Vstm4	3.04372e-82	-0.342712	0.008	0.29	6.08745e-79
Gdf10	5.54952e-82	-0.749294	0.028	0.293	1.1099e-78
Gimap5	9.85679e-81	0.640354	0.237	0.137	1.97136e-77
Ppp1r14a	5.50206e-80	-0.673862	0.07	0.278	1.10041e-76
Tk1	1.56783e-79	-0.26331	0.092	0.23	3.13566e-76
Krtdap	1.65173e-79	-0.55977	0.041	0.22	3.30346e-76
Apoe	2.22796e-79	-0.481436	0.637	0.564	4.45593e-76
Cdkn1a	2.92103e-79	0.895032	0.464	0.512	5.84206e-76
Ifit2	8.60483e-78	0.417286	0.197	0.234	1.72097e-74
Tm6sf1	2.86025e-77	0.705851	0.204	0.116	5.7205e-74
Ildr2	6.41361e-77	-0.319813	0.014	0.243	1.28272e-73
Il34	7.71904e-75	-0.372337	0.01	0.286	1.54381e-71
Nes	4.12013e-74	0.758116	0.269	0.23	8.24027e-71
Zfp36	6.26424e-74	0.260851	0.397	0.617	1.25285e-70
Stab1	7.01734e-74	0.451477	0.195	0.206	1.40347e-70
Abca8b	1.71054e-72	-0.333451	0.1	0.296	3.42108e-69
Pdgfb	2.92676e-72	0.927911	0.26	0.167	5.85352e-69
Pim1	7.25052e-72	-0.293343	0.152	0.357	1.4501e-68
Dact2	1.64406e-71	-0.300642	0.019	0.224	3.28811e-68
Gm2a	6.11219e-68	-0.29514	0.118	0.334	1.22244e-64
Ccnd1	8.35056e-68	0.486182	0.15	0.299	1.67011e-64
mt-Nd4	2.78106e-67	1.28387	0.432	0.454	5.56211e-64
Rnd1	1.35865e-66	0.285829	0.124	0.267	2.7173e-63
Rgs2	1.85424e-66	-0.326462	0.162	0.34	3.70847e-63
Tgm2	1.67966e-64	0.999855	0.326	0.346	3.35932e-61
Ndufv2	1.72729e-64	0.275513	0.391	0.609	3.45459e-61
Pck1	2.74021e-64	0.556672	0.308	0.357	5.48042e-61
Hmcn2	6.97809e-64	-0.291458	0.029	0.245	1.39562e-60
Heyl	1.4477e-63	-0.359642	0.1	0.267	2.89541e-60
Uqcrfs1	1.77179e-63	0.466558	0.502	0.536	3.54357e-60
Nt5dc2	4.56009e-60	-0.257898	0.104	0.316	9.12018e-57
Prg4	7.99547e-60	-0.404262	0.147	0.215	1.59909e-56
Opcml	2.17544e-59	-0.491186	0.009	0.248	4.35089e-56
Lgals3	1.83988e-58	-0.642935	0.12	0.34	3.67976e-55
Mmp3	4.60328e-58	-1.13689	0.084	0.309	9.20657e-55
Ndufc1	6.8632e-58	0.28402	0.381	0.595	1.37264e-54
Uchl1	9.69861e-58	-0.269839	0.023	0.232	1.93972e-54
Has1	1.25145e-57	-0.707968	0.109	0.318	2.50291e-54
Col8a1	6.74986e-57	0.622025	0.164	0.29	1.34997e-53
Saa3	9.71284e-55	-1.12017	0.191	0.357	1.94257e-51
Atp5b	1.93194e-54	0.317551	0.649	0.688	3.86389e-51
Cox4i1	4.6139e-54	0.444896	0.651	0.689	9.22781e-51
Ndufa12	7.24354e-54	0.26433	0.366	0.579	1.44871e-50
Acadl	7.15303e-53	0.540823	0.401	0.454	1.43061e-49
Col6a6	5.38548e-52	-0.274617	0.022	0.261	1.0771e-48
Fry	1.16988e-51	0.3631	0.143	0.254	2.33975e-48
mt-Atp6	4.43315e-50	1.15039	0.379	0.367	8.86631e-47
Acadm	2.2188e-47	0.601962	0.43	0.489	4.43759e-44
Tmpo	1.01466e-46	0.254882	0.219	0.407	2.02933e-43
Rab7b	1.92559e-46	-0.415501	0.002	0.276	3.85119e-43
Ndufa5	9.06058e-46	0.261542	0.336	0.54	1.81212e-42
Mylk	5.6333e-45	-0.384222	0.159	0.32	1.12666e-41
Nrp2	1.98188e-44	0.824789	0.284	0.312	3.96376e-41
P2ry14	2.55763e-44	-0.283346	0.009	0.273	5.11527e-41
Ptp4a3	1.38084e-43	0.598738	0.3	0.353	2.76168e-40
Myh11	2.14819e-43	-0.777576	0.077	0.233	4.29639e-40
Ccl8	2.1607e-43	-0.640348	0.071	0.296	4.32141e-40
Stmn4	2.31049e-43	-0.33643	0.066	0.215	4.62098e-40
Nov	2.33502e-43	-0.289749	0.036	0.21	4.67004e-40
Bambi	9.76084e-43	0.347536	0.169	0.328	1.95217e-39
Arl6ip1	3.34178e-42	0.567247	0.527	0.633	6.68356e-39
Cdk1	1.31333e-41	-0.255418	0.049	0.22	2.62667e-38
Flrt2	1.83319e-38	-0.488073	0.085	0.287	3.66637e-35
Pcdh17	3.63975e-36	0.775177	0.224	0.15	7.2795e-33
Pparg	8.3864e-36	0.760808	0.378	0.456	1.67728e-32
Ppp1r12b	2.44288e-35	-0.259061	0.11	0.292	4.88575e-32
Ier2	4.79413e-35	0.503476	0.595	0.679	9.58827e-32
Col4a4	1.51558e-34	-0.317659	0.032	0.259	3.03116e-31
BC028528	1.95345e-34	0.677914	0.239	0.284	3.9069e-31
Tubb4b	3.77684e-34	0.708119	0.442	0.548	7.55368e-31
Psmb9	5.16516e-34	0.498862	0.317	0.516	1.03303e-30
Uqcrb	7.75571e-34	0.475215	0.527	0.617	1.55114e-30
Gbp3	2.70723e-32	0.360862	0.225	0.394	5.41446e-29
mt-Co3	9.70963e-32	0.989327	0.336	0.333	1.94193e-28
Sfrp4	9.71134e-32	-0.869096	0.072	0.285	1.94227e-28
mt-Cytb	4.89726e-30	1.10056	0.348	0.346	9.79452e-27
Smpd3	2.85252e-29	-0.375004	0.054	0.214	5.70505e-26
Uqcrq	9.31652e-29	0.508661	0.546	0.623	1.8633e-25
Hspa1b	1.12282e-28	0.507809	0.276	0.345	2.24564e-25
Ucp2	1.79193e-28	0.69291	0.257	0.283	3.58387e-25
Pamr1	2.06101e-28	-0.395327	0.057	0.202	4.12203e-25
Sod2	4.64384e-28	0.25484	0.401	0.577	9.28768e-25
Gja4	3.85439e-27	0.548342	0.163	0.202	7.70879e-24
Ifi203	4.35096e-27	0.274212	0.326	0.5	8.70192e-24
Alkal2	1.39401e-26	-0.262622	0.024	0.261	2.78802e-23
Pde4b	2.15061e-26	0.286421	0.176	0.308	4.30121e-23
Icam1	3.31827e-26	0.333664	0.244	0.403	6.63655e-23
Ndufs2	3.43133e-26	0.309245	0.389	0.576	6.86265e-23
Ndufa8	3.54281e-26	0.6462	0.522	0.651	7.08562e-23
Tspan15	1.67578e-25	0.6208	0.255	0.254	3.35155e-22
Rgs4	4.98594e-25	-0.430299	0.021	0.201	9.97187e-22
Abcc9	8.91424e-25	-0.527782	0.056	0.217	1.78285e-21
Atp5j2	4.21184e-24	0.492574	0.552	0.649	8.42367e-21
Chpt1	5.33113e-24	0.279996	0.325	0.49	1.06623e-20
Cycs	7.3998e-24	0.307815	0.322	0.497	1.47996e-20
Carmn	2.09412e-23	-0.298869	0.003	0.243	4.18824e-20
Slc3a2	2.16107e-23	0.411547	0.267	0.446	4.32213e-20
Cpe	2.95325e-22	-0.378067	0.03	0.232	5.90649e-19
Clec14a	8.84929e-22	0.926313	0.254	0.276	1.76986e-18
Ehd4	1.8033e-21	0.577044	0.185	0.262	3.6066e-18
Tmem123	6.70421e-21	0.341989	0.267	0.434	1.34084e-17
Cox7a2	8.96716e-21	0.484762	0.548	0.65	1.79343e-17
Etfb	5.6983e-20	0.384983	0.501	0.567	1.13966e-16
Orm1	6.16013e-20	0.277254	0.229	0.259	1.23203e-16
Atp5h	5.64179e-19	0.381905	0.613	0.7	1.12836e-15
Afap1l1	1.93741e-18	0.93521	0.252	0.217	3.87481e-15
Gmpr	2.82554e-18	0.379849	0.243	0.299	5.65107e-15
Fbln5	2.93851e-18	0.575071	0.27	0.45	5.87702e-15
Stmn2	5.35375e-18	1.35726	0.236	0.244	1.07075e-14
Fam181b	5.54522e-18	0.886627	0.233	0.157	1.10904e-14
Vtn	8.8038e-18	-0.686887	0.091	0.289	1.76076e-14
Agpat2	1.09238e-17	0.433298	0.367	0.453	2.18476e-14
Taldo1	1.14836e-17	0.373805	0.402	0.58	2.29671e-14
Pnpla2	3.61956e-17	0.677338	0.371	0.455	7.23912e-14
Gm12216	1.17828e-16	0.382022	0.287	0.455	2.35656e-13
Ndufb5	1.65766e-16	0.273824	0.461	0.636	3.31532e-13
Hbb-bs	9.62095e-16	2.1867	0.161	0.254	1.92419e-12
Osr1	2.19798e-15	-0.641423	0.06	0.271	4.39596e-12
Uqcr11	6.66791e-15	0.441176	0.506	0.597	1.33358e-11
Uqcrc2	6.97021e-15	0.311553	0.327	0.499	1.39404e-11
Matn2	9.54326e-15	-0.497087	0.077	0.295	1.90865e-11
Ndufb6	1.21904e-14	0.311853	0.422	0.588	2.43808e-11
Tsc22d1	4.17195e-14	0.496258	0.404	0.514	8.3439e-11
Rasd1	2.50787e-13	0.286958	0.173	0.265	5.01574e-10
Dmkn	1.17948e-12	-0.864179	0.128	0.28	2.35895e-09
Lipe	1.52232e-12	0.574204	0.296	0.39	3.04463e-09
H19	2.43579e-12	-0.365096	0.106	0.249	4.87159e-09
Ifi27	3.966e-12	0.277457	0.602	0.662	7.932e-09
Sdhb	6.43542e-12	0.377764	0.45	0.623	1.28708e-08
Emb	8.23345e-12	-0.406807	0.083	0.259	1.64669e-08
S100a4	1.09949e-11	-0.40431	0.067	0.274	2.19898e-08
Selplg	1.89314e-11	-0.258229	0.038	0.204	3.78628e-08
Crem	5.26418e-11	0.257268	0.234	0.323	1.05284e-07
Ndufa4	9.55458e-11	0.366385	0.579	0.678	1.91092e-07
Hey1	2.06183e-10	0.610503	0.183	0.233	4.12366e-07
Ldha	8.70666e-10	0.304407	0.571	0.679	1.74133e-06
Lmcd1	3.57988e-09	0.701433	0.197	0.21	7.15976e-06
Aco2	6.06985e-09	0.306201	0.332	0.483	1.21397e-05
Ndufb9	7.05637e-09	0.347392	0.555	0.643	1.41127e-05
Cnp	4.96456e-08	-0.263055	0.099	0.259	9.92912e-05
Il1r2	5.03541e-08	-0.583096	0.071	0.254	0.000100708
Peg3	8.85517e-08	-0.293776	0.115	0.279	0.000177103
Lrg1	9.86026e-08	0.995527	0.25	0.304	0.000197205
Cyr61	1.2312e-07	0.659629	0.393	0.508	0.00024624
Uqcr10	1.67761e-07	0.402412	0.502	0.601	0.000335521
Ramp1	2.27293e-07	-0.393158	0.075	0.241	0.000454587
Cdo1	3.26819e-07	0.46905	0.244	0.336	0.000653637
Gpd1	5.05316e-07	0.308923	0.321	0.425	0.00101063
Igtp	1.55993e-06	0.262583	0.205	0.342	0.00311987
9930111J21Rik2	2.6136e-06	0.549183	0.17	0.279	0.00522719
Cox7c	3.64044e-06	0.328469	0.574	0.672	0.00728088
Retn	1.28096e-05	0.256505	0.248	0.348	0.0256191
Fabp3	1.43803e-05	0.585928	0.296	0.402	0.0287606
Dbp	1.78202e-05	0.280325	0.181	0.284	0.0356404
Penk	2.20311e-05	-0.472171	0.043	0.225	0.0440622
Clec11a	3.76603e-05	-0.561909	0.077	0.274	0.0753206
Plscr2	4.50635e-05	0.369715	0.13	0.215	0.090127
Pdgfrl	4.97193e-05	-0.385175	0.02	0.248	0.0994387
Rasgrp2	5.53025e-05	0.354552	0.21	0.312	0.110605
Gadd45g	0.000142869	0.262375	0.51	0.656	0.285737
Rasa4	0.00024999	0.340718	0.152	0.225	0.49998
Apobec3	0.000330715	0.5138	0.237	0.328	0.661431
Mecom	0.000427915	0.73827	0.212	0.239	0.855831
Mrpl34	0.00085174	0.292831	0.308	0.424	1
Mdh2	0.000907678	0.262509	0.452	0.594	1
Cmpk2	0.000917595	0.295383	0.148	0.27	1
Iigp1	0.00100466	0.494704	0.37	0.515	1
Sema3b	0.00168485	-0.347457	0.004	0.224	1
Mpc2	0.0028685	0.298563	0.511	0.638	1
Gbp2	0.00465334	0.443539	0.253	0.382	1
Uqcrc1	0.00700259	0.413088	0.452	0.576	1
Synm	0.00749732	0.377174	0.208	0.292	1
Mpc1	0.0166794	0.426932	0.491	0.604	1
Suclg1	0.0194642	0.407483	0.408	0.527	1
Dll4	0.0199834	0.692942	0.203	0.156	1
Eci1	0.0241875	0.585951	0.389	0.513	1
Cd59a	0.0261864	0.404714	0.139	0.206	1
Cbfa2t3	0.0317188	0.559051	0.199	0.253	1
Adipor2	0.0327549	0.479602	0.225	0.354	1
Plvap	0.0450315	0.937546	0.231	0.339	1
Adig	0.0942937	0.423867	0.283	0.401	1
Gpnmb	0.0991953	-0.411187	0.02	0.232	1
Rtp4	0.131699	0.37622	0.316	0.442	1
Plin2	0.148648	0.302826	0.433	0.559	1
Cox7b	0.164024	0.37271	0.454	0.584	1
C130074G19Rik	0.218268	0.567553	0.21	0.216	1
Cfh	0.279981	-0.48406	0.024	0.21	1
Cox5b	0.298119	0.378501	0.47	0.613	1
Cidec	0.394476	0.325346	0.257	0.355	1
Serpina3n	0.415353	-0.470233	0.135	0.297	1
Limch1	0.609373	0.267898	0.187	0.246	1
Atp5k	0.688677	0.351297	0.333	0.461	1
Clu	0.7286	0.475523	0.131	0.244	1
Serpinb9	0.736094	0.361613	0.211	0.322	1
Myo1b	0.748533	0.298769	0.29	0.394	1
Ndufab1	0.875121	0.287896	0.458	0.576	1
Cyc1	0.884069	0.287235	0.447	0.572	1
Cib2	0.911699	0.304285	0.233	0.345	1
Tagln2	0.912196	0.486914	0.479	0.668	1
Ndufc2	0.921995	0.440677	0.468	0.637	1
Ier3	0.933792	0.805052	0.416	0.547	1

## Sheet: Schwann
	p_val	avg_logFC	pct.1	pct.2	p_val_adj
Mpz	0	4.92022	0.832	0.131	0
Mbp	0	3.99564	0.855	0.196	0
Kcna1	0	3.42482	0.929	0.035	0
Plp1	0	3.36995	0.926	0.103	0
Gatm	0	3.15164	0.873	0.04	0
Cd9	0	3.05556	0.985	0.455	0
Cryab	0	3.02771	0.95	0.371	0
Prnp	0	2.83803	0.926	0.399	0
Cnp	0	2.78616	0.894	0.216	0
Gfra3	0	2.58492	0.614	0.032	0
Gpm6b	0	2.3386	0.907	0.404	0
Mal	0	2.25041	0.732	0.015	0
Ptn	0	2.23612	0.773	0.173	0
Ncmap	0	2.20601	0.438	0.014	0
Sostdc1	0	2.02472	0.717	0.013	0
Gpr37l1	0	1.9623	0.631	0.037	0
Cdh19	0	1.8947	0.726	0.108	0
Art3	0	1.84681	0.879	0.238	0
Plekhb1	0	1.82183	0.583	0.027	0
Ttyh1	0	1.343	0.653	0.05	0
Ugt8a	0	1.27624	0.403	0	0
Slitrk6	0	1.27477	0.586	0.024	0
L1cam	0	1.15252	0.586	0.032	0
Ptprz1	0	1.12287	0.587	0.014	0
Gm2115	0	1.09374	0.513	0.006	0
Klk9	0	0.767912	0.528	0.001	0
Smco3	0	0.747506	0.31	0	0
Tmprss5	0	0.628821	0.462	0.007	0
A330069K06Rik	0	0.539849	0.276	0	0
Moxd1	3.185e-303	0.902011	0.465	0.015	6.37e-300
Mlip	3.4049e-298	1.26247	0.434	0.006	6.80979e-295
Rasgef1c	1.24167e-288	0.767496	0.435	0.009	2.48335e-285
Aspa	1.46582e-271	1.93782	0.779	0.212	2.93165e-268
Sox2	1.43149e-269	0.501056	0.364	0.001	2.86298e-266
Cd59a	1.85031e-265	1.98371	0.779	0.184	3.70062e-262
Pmp22	9.80004e-257	3.09664	0.912	0.545	1.96001e-253
Chl1	3.82439e-249	1.62368	0.622	0.101	7.64879e-246
Fa2h	1.07095e-239	0.716957	0.323	0.002	2.14189e-236
Apba2	2.12729e-237	0.489541	0.358	0.002	4.25457e-234
Mcam	1.83476e-222	0.99812	0.677	0.164	3.66952e-219
Sox10	4.08337e-220	1.29146	0.422	0.001	8.16674e-217
Dbi	2.558e-217	1.94244	0.892	0.591	5.116e-214
Ndrg1	6.17144e-208	2.07033	0.795	0.345	1.23429e-204
Ngfr	3.95756e-197	0.839443	0.535	0.108	7.91511e-194
Gap43	1.1256e-193	0.370395	0.543	0.094	2.25121e-190
Itm2a	1.15259e-176	1.32168	0.838	0.384	2.30519e-173
Anln	2.30155e-175	0.47629	0.578	0.157	4.6031e-172
Egfl8	2.34149e-173	2.06195	0.664	0.153	4.68298e-170
Vwa1	6.05812e-169	2.3842	0.749	0.29	1.21162e-165
Cldn19	1.06068e-156	1.06272	0.335	0.017	2.12135e-153
Nrn1	1.98327e-153	1.81899	0.546	0.063	3.96653e-150
Sfrp1	6.46811e-143	1.61708	0.77	0.342	1.29362e-139
S100b	5.01655e-141	2.03415	0.677	0.224	1.00331e-137
Dusp15	2.25073e-138	1.04069	0.363	0.05	4.50147e-135
Grb14	2.82195e-136	1.13253	0.678	0.29	5.64391e-133
Scd2	6.46105e-134	1.69445	0.779	0.458	1.29221e-130
Sema3b	1.07737e-133	1.86091	0.655	0.171	2.15474e-130
Fam89a	6.41689e-132	1.06367	0.547	0.143	1.28338e-128
Csrp1	8.02279e-128	1.30479	0.763	0.406	1.60456e-124
Apoe	1.82031e-126	1.61548	0.866	0.575	3.64063e-123
S100a4	6.46522e-120	1.64318	0.661	0.224	1.29304e-116
Matn2	2.98577e-117	2.53234	0.674	0.243	5.97153e-114
Prx	1.88537e-100	1.5457	0.398	0.084	3.77075e-97
Gas7	1.01732e-99	0.980905	0.662	0.284	2.03463e-96
Cadm4	6.76463e-95	1.48487	0.49	0.034	1.35293e-91
Foxd3	3.83314e-92	0.81544	0.364	0	7.66629e-89
Stmn1	9.24694e-92	1.16627	0.692	0.369	1.84939e-88
Sqle	1.89578e-91	0.236719	0.145	0.323	3.79155e-88
Wnt6	2.7432e-91	1.06588	0.481	0.067	5.48641e-88
Cd200	8.70342e-89	0.417039	0.681	0.345	1.74068e-85
Scn7a	2.11869e-88	2.29674	0.652	0.339	4.23737e-85
Cmtm5	2.53614e-86	1.3577	0.419	0.004	5.07227e-83
Edil3	2.92113e-85	1.14657	0.407	0.029	5.84226e-82
Gfra2	3.29749e-85	1.50163	0.558	0.136	6.59498e-82
Limch1	6.07249e-83	1.53484	0.586	0.229	1.2145e-79
Nkd2	4.65685e-78	0.937142	0.487	0.133	9.3137e-75
Lbh	6.25121e-76	0.916163	0.631	0.331	1.25024e-72
Ppt1	1.60052e-75	0.491201	0.643	0.313	3.20104e-72
Ncam1	4.24809e-75	1.34918	0.543	0.164	8.49618e-72
Reln	2.40357e-73	1.02889	0.401	0.019	4.80715e-70
Gpm6a	2.42836e-72	0.666918	0.283	0.011	4.85673e-69
Pdgfa	2.79063e-72	1.8789	0.603	0.23	5.58125e-69
Itgb8	1.90239e-71	1.02684	0.473	0.088	3.80478e-68
Serpind1	4.39037e-69	0.935518	0.265	0.022	8.78075e-66
Kcna2	9.87094e-69	1.56201	0.547	0.152	1.97419e-65
Insc	1.19487e-66	0.796474	0.389	0.018	2.38974e-63
Fam181b	3.56167e-66	0.265407	0.5	0.168	7.12333e-63
Zfp536	9.83614e-66	0.824134	0.274	0.006	1.96723e-62
Bpgm	4.14101e-65	0.364384	0.527	0.255	8.28203e-62
Fgl2	1.12457e-62	2.18881	0.594	0.266	2.24915e-59
Cdkn1a	6.18523e-62	0.864998	0.745	0.498	1.23705e-58
Pllp	1.57254e-60	1.73451	0.428	0.08	3.14508e-57
Cadm1	6.50755e-59	1.85937	0.556	0.179	1.30151e-55
Idi1	1.2603e-58	0.459885	0.217	0.368	2.52061e-55
Alcam	3.43159e-58	1.0651	0.456	0.085	6.86317e-55
Postn	6.25925e-57	1.23266	0.726	0.478	1.25185e-53
Tnfrsf12a	3.68526e-54	0.602848	0.618	0.347	7.37052e-51
Cadm2	2.84457e-53	1.01037	0.288	0.011	5.68915e-50
Fdps	7.91957e-53	0.501982	0.63	0.369	1.58391e-49
Ephx2	7.3587e-52	0.77331	0.596	0.339	1.47174e-48
Ldhb	2.72681e-51	1.15074	0.665	0.46	5.45362e-48
Acsl3	2.31566e-50	0.347287	0.618	0.36	4.63133e-47
Scg3	5.2706e-49	0.264555	0.469	0.188	1.05412e-45
Sfrp5	4.59146e-47	1.40768	0.457	0.059	9.18292e-44
Cdkn2c	4.91716e-47	0.796923	0.59	0.311	9.83433e-44
Anxa1	1.1418e-46	0.605847	0.838	0.569	2.28361e-43
Ntng1	1.57585e-44	0.799568	0.248	0.065	3.15169e-41
Abi3bp	9.52935e-44	0.76715	0.662	0.377	1.90587e-40
Bcas1	2.96611e-42	1.17972	0.426	0.104	5.93223e-39
Tspan15	4.0821e-41	1.23418	0.543	0.25	8.1642e-38
Klk8	1.47494e-40	1.45084	0.478	0.103	2.94987e-37
Ank3	4.72888e-40	1.54762	0.512	0.169	9.45777e-37
Lpcat2	2.57425e-39	0.713895	0.242	0.14	5.14851e-36
Tubb5	7.10895e-39	1.00404	0.709	0.523	1.42179e-35
Fxyd3	2.23026e-37	0.918549	0.229	0.059	4.46052e-34
Slc27a1	1.83328e-36	0.573615	0.491	0.263	3.66656e-33
Fxyd6	1.91223e-33	1.2456	0.479	0.209	3.82446e-30
Psat1	1.36525e-32	0.615581	0.532	0.294	2.7305e-29
Mt3	3.88105e-31	0.813515	0.33	0.003	7.76209e-28
Tagln2	4.25796e-31	0.648274	0.805	0.626	8.51592e-28
Anxa2	1.0343e-30	0.564727	0.855	0.676	2.06861e-27
Dlgap1	1.34324e-30	1.18263	0.426	0.071	2.68648e-27
Egr2	1.36142e-30	0.680664	0.565	0.355	2.72283e-27
Ckb	8.53278e-30	0.862799	0.621	0.448	1.70656e-26
Gas2l3	1.091e-29	1.22983	0.414	0.065	2.182e-26
Actb	2.19387e-29	0.276156	0.624	0.36	4.38773e-26
Elovl6	3.41764e-29	0.616569	0.532	0.349	6.83527e-26
Rgs16	3.33983e-28	0.328189	0.369	0.205	6.67967e-25
Msmo1	4.64923e-28	0.678236	0.246	0.299	9.29845e-25
Pa2g4	1.24271e-27	0.405663	0.605	0.387	2.48542e-24
Rflna	2.21573e-27	0.587904	0.347	0.036	4.43146e-24
Kcna6	5.25836e-26	1.02108	0.363	0.008	1.05167e-22
Tppp3	3.0242e-25	0.538873	0.706	0.533	6.04841e-22
Atp1a2	1.81469e-24	1.12648	0.553	0.369	3.62937e-21
Mt1	7.97839e-24	0.771627	0.78	0.611	1.59568e-20
Nrp2	1.04622e-23	0.414855	0.5	0.303	2.09244e-20
Cmbl	1.14678e-22	0.544017	0.509	0.324	2.29355e-19
Sbspon	6.53711e-22	0.876447	0.386	0.051	1.30742e-18
Atp1b2	1.4818e-21	0.462123	0.255	0.197	2.9636e-18
Tkt	1.44146e-20	0.464248	0.689	0.534	2.88291e-17
Nr2f2	3.39825e-20	0.331959	0.456	0.244	6.7965e-17
Slc3a2	7.18494e-20	0.468285	0.581	0.406	1.43699e-16
Ppp1r12b	1.33107e-19	0.231338	0.456	0.251	2.66214e-16
Hmgcs2	1.751e-19	1.23407	0.413	0.064	3.502e-16
Ifit1	8.45428e-19	0.635181	0.572	0.36	1.69086e-15
Cox7c	6.63997e-18	0.411658	0.795	0.649	1.32799e-14
Sema4f	8.75692e-18	0.665526	0.355	0.018	1.75138e-14
Lgals3	1.64404e-17	1.46103	0.472	0.292	3.28809e-14
Nkain4	2.81218e-17	0.904397	0.276	0.061	5.62435e-14
Fabp7	3.03866e-17	1.49218	0.386	0.04	6.07731e-14
Paqr6	3.51733e-17	1.27409	0.419	0.069	7.03467e-14
Crlf1	1.7321e-16	0.253664	0.373	0.139	3.46421e-13
Dusp26	4.65988e-16	0.581605	0.36	0.071	9.31977e-13
Nr4a2	1.02279e-15	0.974546	0.453	0.268	2.04558e-12
Pappa	4.52377e-15	0.55562	0.372	0.153	9.04755e-12
Col18a1	5.56351e-15	0.89892	0.54	0.409	1.1127e-11
Tubb4b	5.7355e-15	0.211502	0.715	0.523	1.1471e-11
Rcan2	7.0243e-15	0.233457	0.235	0.181	1.40486e-11
Snca	4.13934e-14	1.25389	0.383	0.044	8.27867e-11
Fcgr2b	7.95156e-14	1.43818	0.386	0.017	1.59031e-10
Csmd1	1.63142e-13	1.06917	0.379	0.037	3.26284e-10
Cd82	2.04949e-13	0.602903	0.261	0.22	4.09898e-10
Ahr	2.08257e-13	0.253236	0.271	0.155	4.16513e-10
Gbp2	9.21061e-13	0.297522	0.258	0.356	1.84212e-09
Efhd1	2.75382e-12	0.675142	0.457	0.232	5.50764e-09
Naaa	5.56806e-12	0.256933	0.296	0.339	1.11361e-08
Rcan1	5.57084e-12	0.242752	0.255	0.278	1.11417e-08
Cspg4	5.73988e-12	0.341861	0.37	0.17	1.14798e-08
Hbegf	1.34207e-11	1.32104	0.466	0.28	2.68413e-08
Ctsc	2.91465e-11	0.382928	0.304	0.295	5.8293e-08
Nr4a1	1.14375e-10	0.29455	0.378	0.432	2.28751e-07
Fam178b	1.54608e-10	1.53811	0.376	0.15	3.09217e-07
Itga6	1.57524e-10	0.527873	0.468	0.269	3.15048e-07
Hadh	2.90649e-10	0.274772	0.609	0.484	5.81298e-07
Ndrg2	3.15911e-10	0.852172	0.484	0.339	6.31822e-07
Ppm1l	4.49382e-10	0.679411	0.351	0.14	8.98763e-07
Prim1	6.39721e-10	0.318171	0.403	0.252	1.27944e-06
Cadm3	7.65167e-10	0.311503	0.317	0.285	1.53033e-06
Lmna	2.0511e-09	0.543217	0.621	0.571	4.1022e-06
Actg1	3.566e-09	0.224207	0.886	0.765	7.132e-06
Ifi27l2a	3.77698e-09	0.385021	0.77	0.636	7.55396e-06
Gbp3	8.88706e-09	0.28443	0.294	0.36	1.77741e-05
Phgdh	3.95405e-08	0.833777	0.506	0.382	7.9081e-05
Marcksl1	5.33333e-08	0.471063	0.311	0.317	0.000106667
Lgals1	7.37003e-08	0.357893	0.858	0.725	0.000147401
Fam105a	4.09194e-07	0.353776	0.265	0.121	0.000818387
Abca8a	4.19243e-07	0.41079	0.577	0.433	0.000838485
Kmt5a	4.94575e-07	0.227334	0.429	0.297	0.000989151
Igtp	1.19457e-06	0.307836	0.459	0.311	0.00238914
Matn4	2.33345e-06	0.850614	0.294	0.133	0.00466689
Cdc42ep3	6.66954e-06	0.470527	0.316	0.254	0.0133391
Taldo1	9.90753e-06	0.368268	0.628	0.541	0.0198151
Tubb2b	9.92253e-06	1.02029	0.42	0.254	0.0198451
Abca8b	1.21216e-05	0.646938	0.302	0.255	0.0242432
Itga7	1.3413e-05	0.25635	0.397	0.222	0.0268259
Tst	1.71594e-05	0.40619	0.335	0.333	0.0343189
Ccnd1	1.83969e-05	0.704208	0.417	0.266	0.0367937
Cystm1	3.07744e-05	0.617071	0.33	0.269	0.0615488
Tubb3	3.3262e-05	0.320957	0.276	0.203	0.0665241
Slc25a1	4.28392e-05	0.306459	0.44	0.313	0.0856784
Ifit3b	0.000333063	0.237591	0.226	0.24	0.666127
Pdlim4	0.000355376	1.11816	0.44	0.343	0.710752
Il34	0.000458081	0.491048	0.311	0.227	0.916162
Acss2	0.00064938	0.456487	0.311	0.278	1
Tuba1b	0.0010315	0.25717	0.619	0.574	1
Iqgap2	0.00167602	1.16538	0.397	0.149	1
Socs3	0.00191745	0.218871	0.689	0.569	1
Synm	0.00194375	0.42904	0.286	0.274	1
Fam213b	0.00338369	0.76482	0.392	0.293	1
Gnai1	0.00436692	0.6124	0.302	0.226	1
Pla2g16	0.00450565	0.299366	0.472	0.517	1
Btc	0.00610703	0.270749	0.257	0.196	1
Kcnk1	0.00673316	0.557493	0.208	0.004	1
B3galt2	0.00921217	0.45138	0.27	0.077	1
Sc5d	0.0120069	0.304745	0.379	0.347	1
Cpe	0.0123846	0.791238	0.392	0.187	1
Dstn	0.0231035	0.235259	0.571	0.537	1
Hspb2	0.0363574	0.864338	0.355	0.153	1
Ifit3	0.050267	0.937418	0.339	0.326	1
Fam49b	0.107915	0.242939	0.326	0.286	1
Ifit2	0.121672	0.224725	0.33	0.225	1
Dek	0.136674	0.219663	0.518	0.446	1
Fibin	0.214766	0.210096	0.289	0.188	1
B2m	0.230545	0.399401	0.826	0.841	1
Siva1	0.244122	0.255111	0.491	0.427	1
Apod	0.300798	0.47581	0.481	0.429	1
Sorbs1	0.35214	0.525898	0.36	0.251	1
Luzp2	0.442257	0.547581	0.311	0.01	1
Sncg	0.459771	0.462754	0.367	0.302	1
Sorbs2	0.530074	0.960859	0.353	0.093	1
mt-Nd4	0.603583	0.260472	0.456	0.45	1
Itgb4	0.742127	0.701065	0.335	0.135	1
Hmgcs1	0.899723	0.610325	0.441	0.411	1
Slc36a2	0.926281	0.606603	0.345	0.255	1
Itga4	0.998573	0.670457	0.289	0.051	1

## Sheet: Prolif
	p_val	avg_logFC	pct.1	pct.2	p_val_adj
Stmn1	0	2.09535	0.934	0.352	0
H2afz	0	1.96267	0.987	0.564	0
Cks2	0	1.8523	0.845	0.351	0
Birc5	0	1.78711	0.826	0.299	0
Cenpa	0	1.77364	0.73	0.323	0
Ube2c	0	1.6923	0.654	0.255	0
Top2a	0	1.66579	0.685	0.206	0
Pclaf	0	1.65778	0.812	0.296	0
Tubb5	0	1.63392	0.918	0.511	0
Cenpf	0	1.63361	0.646	0.147	0
Cdc20	0	1.4993	0.646	0.228	0
Ube2s	0	1.49767	0.939	0.525	0
Hmgb2	0	1.47553	0.874	0.4	0
Tubb6	0	1.44327	0.865	0.38	0
Timp1	0	1.43393	0.79	0.4	0
Cdca3	0	1.41717	0.724	0.245	0
Mki67	0	1.41681	0.678	0.162	0
Ccnb2	0	1.39592	0.663	0.251	0
Smc4	0	1.37901	0.816	0.291	0
Cdk1	0	1.3678	0.649	0.167	0
Selenoh	0	1.34158	0.895	0.407	0
Prc1	0	1.29426	0.566	0.133	0
Cdca8	0	1.29189	0.677	0.225	0
Tuba1b	0	1.24969	0.927	0.562	0
Tk1	0	1.24665	0.707	0.182	0
Smc2	0	1.24429	0.745	0.316	0
Hmmr	0	1.23369	0.595	0.076	0
Ran	0	1.22026	0.961	0.602	0
Cenpe	0	1.2119	0.565	0.125	0
Tpx2	0	1.19003	0.621	0.159	0
H2afv	0	1.17479	0.906	0.528	0
Cks1b	0	1.14518	0.876	0.42	0
Ccna2	0	1.12847	0.615	0.136	0
Cenpm	0	1.12689	0.688	0.199	0
Knstrn	0	1.10861	0.607	0.197	0
H2afx	0	1.10398	0.653	0.277	0
Lgals1	0	1.07504	0.948	0.719	0
Spc24	0	1.05043	0.636	0.187	0
Ccnb1	0	1.03629	0.519	0.118	0
Cdkn3	0	1.02134	0.552	0.177	0
Ccdc34	0	1.02115	0.774	0.345	0
Mxd3	0	0.993945	0.527	0.134	0
Racgap1	0	0.993659	0.577	0.187	0
Nucks1	0	0.988344	0.882	0.457	0
Tmpo	0	0.967542	0.753	0.353	0
Anp32b	0	0.966371	0.925	0.583	0
Tyms	0	0.956502	0.648	0.293	0
Pimreg	0	0.932181	0.521	0.101	0
Ranbp1	0	0.924483	0.903	0.563	0
Lmna	0	0.919836	0.876	0.56	0
Tagln2	0	0.899036	0.909	0.618	0
Spc25	0	0.890449	0.527	0.125	0
Ckap2l	0	0.888634	0.526	0.158	0
Anln	0	0.884071	0.538	0.149	0
Lmnb1	0	0.870665	0.607	0.273	0
Aspm	0	0.844123	0.474	0.121	0
Pbk	0	0.826174	0.499	0.121	0
Ckap2	0	0.821566	0.493	0.123	0
Dek	0	0.784957	0.815	0.434	0
Pmf1	0	0.767585	0.611	0.296	0
Plk1	0	0.757065	0.477	0.115	0
Lsm2	0	0.755084	0.746	0.343	0
Kif22	0	0.727618	0.48	0.096	0
Knl1	0	0.705729	0.462	0.078	0
Nuf2	0	0.694545	0.45	0.082	0
Kif20b	0	0.678829	0.449	0.123	0
Aurkb	0	0.655681	0.445	0.095	0
Diaph3	0	0.653079	0.457	0.122	0
Hist1h1b	0	0.622292	0.38	0.038	0
Sgo2a	0	0.617072	0.419	0.067	0
Kif11	0	0.595651	0.437	0.104	0
Esco2	0	0.575434	0.421	0.071	0
Depdc1a	0	0.563155	0.372	0.05	0
Mis18bp1	0	0.557464	0.391	0.079	0
Bub1b	0	0.509059	0.392	0.079	0
Dlgap5	0	0.481139	0.395	0.055	0
Kif2c	0	0.47664	0.346	0.044	0
Ncapg	0	0.452163	0.355	0.052	0
Cep55	0	0.445995	0.348	0.033	0
Ska1	0	0.430521	0.35	0.047	0
Kif4	0	0.427543	0.387	0.035	0
Cdca2	0	0.422477	0.374	0.073	0
Bub1	0	0.39883	0.355	0.029	0
Hist1h1a	0	0.202247	0.311	0.058	0
Cdc25c	2.70843e-307	0.397177	0.307	0.034	5.41685e-304
C330027C09Rik	2.65236e-301	0.60136	0.436	0.127	5.30473e-298
Rrm2	7.26691e-298	0.758691	0.558	0.249	1.45338e-294
Ect2	1.30539e-295	0.433186	0.343	0.063	2.61078e-292
Ndc80	1.29228e-294	0.458871	0.351	0.062	2.58455e-291
Dut	6.89842e-289	0.711862	0.671	0.343	1.37968e-285
Dnajc9	1.1203e-282	0.660402	0.601	0.283	2.24059e-279
Snrpd1	1.7444e-275	0.594162	0.77	0.41	3.4888e-272
Nek2	8.006e-275	0.343593	0.3	0.037	1.6012e-271
Slfn9	2.55139e-274	0.789067	0.554	0.256	5.10277e-271
Hmgn2	5.46636e-273	0.874798	0.672	0.386	1.09327e-269
Aurka	1.77769e-267	0.580772	0.417	0.14	3.55538e-264
Rad51ap1	1.19264e-262	0.451601	0.407	0.127	2.38527e-259
Kif23	7.56017e-252	0.725867	0.43	0.123	1.51203e-248
Tacc3	3.26512e-242	0.789644	0.497	0.203	6.53025e-239
Dtymk	5.80348e-240	0.607168	0.719	0.417	1.1607e-236
Gins2	3.03157e-233	0.649082	0.515	0.253	6.06315e-230
Tubb4b	3.04629e-232	0.787949	0.816	0.515	6.09257e-229
Lig1	6.12126e-229	0.64061	0.502	0.251	1.22425e-225
Atad2	2.25005e-227	0.603059	0.502	0.259	4.5001e-224
Lockd	1.597e-223	0.838927	0.466	0.171	3.19401e-220
Prr11	1.39098e-222	0.374888	0.327	0.079	2.78196e-219
Set	2.47625e-221	0.507413	0.809	0.468	4.9525e-218
Gmnn	4.47016e-218	0.637887	0.53	0.283	8.94033e-215
Actg1	6.21846e-218	0.789448	0.925	0.761	1.24369e-214
Rrm1	1.26449e-217	0.697577	0.543	0.286	2.52899e-214
Cdkn2d	1.33815e-217	0.76757	0.564	0.293	2.67629e-214
Anxa2	2.85574e-216	0.810765	0.887	0.67	5.71148e-213
Asf1b	1.95293e-213	0.544901	0.437	0.166	3.90587e-210
Hnrnpa1	7.17562e-211	0.558667	0.839	0.559	1.43512e-207
Dctpp1	3.63331e-208	0.473202	0.624	0.352	7.26663e-205
Shcbp1	1.10611e-207	0.470842	0.357	0.093	2.21222e-204
Ezh2	5.47034e-204	0.490849	0.484	0.249	1.09407e-200
Lrrc59	4.15781e-198	0.548128	0.673	0.388	8.31563e-195
Rangap1	1.4831e-197	0.610124	0.512	0.262	2.96619e-194
Nt5dc2	3.76293e-193	0.528683	0.511	0.263	7.52586e-190
Cdkn2c	4.63806e-190	0.663912	0.543	0.307	9.27612e-187
Gas2l3	1.41907e-187	0.347803	0.297	0.061	2.83815e-184
Manf	7.80526e-186	0.550486	0.836	0.572	1.56105e-182
Rad51	4.56994e-185	0.376483	0.362	0.127	9.13987e-182
Siva1	5.1904e-185	0.517431	0.686	0.418	1.03808e-181
Kif20a	3.64487e-182	0.663001	0.386	0.111	7.28973e-179
Nusap1	2.68331e-178	0.734009	0.414	0.171	5.36662e-175
Sh3bgrl3	5.42206e-177	0.524963	0.872	0.659	1.08441e-173
Naa50	9.2157e-177	0.503401	0.689	0.439	1.84314e-173
Kif15	8.96125e-174	0.429556	0.323	0.064	1.79225e-170
Fam83d	4.6953e-170	0.329659	0.315	0.094	9.3906e-167
Tcp1	3.14784e-166	0.39719	0.737	0.459	6.29568e-163
Ube2t	4.65929e-166	0.331721	0.332	0.105	9.31858e-163
Fen1	4.99184e-165	0.398634	0.389	0.19	9.98368e-162
Nme1	1.3135e-162	0.502875	0.817	0.602	2.62699e-159
Npm1	9.19682e-161	0.490228	0.893	0.665	1.83936e-157
Ccl2	8.14973e-160	1.31434	0.612	0.41	1.62995e-156
Cmc2	1.35595e-157	0.404816	0.552	0.322	2.71191e-154
Dclk1	1.45677e-157	0.466659	0.642	0.367	2.91355e-154
Bgn	2.5599e-157	0.506074	0.844	0.603	5.11979e-154
Tnc	3.60284e-156	0.794445	0.461	0.236	7.20569e-153
Cenpq	5.21506e-156	0.597866	0.448	0.248	1.04301e-152
Eif5a	2.28965e-155	0.55268	0.879	0.69	4.57931e-152
Neil3	6.53065e-155	0.35418	0.272	0.04	1.30613e-151
Mrpl18	6.89592e-155	0.325491	0.76	0.467	1.37918e-151
Mad2l1	2.14351e-148	0.559001	0.413	0.195	4.28701e-145
Bst2	8.93766e-147	0.546194	0.847	0.66	1.78753e-143
Incenp	3.50268e-143	0.565832	0.418	0.224	7.00537e-140
Fscn1	7.3293e-142	0.369444	0.66	0.413	1.46586e-138
Hsp90aa1	3.44014e-141	0.415049	0.894	0.691	6.88028e-138
Rpa2	1.2421e-140	0.419074	0.453	0.268	2.48419e-137
Cthrc1	7.59396e-138	0.952027	0.558	0.339	1.51879e-134
Fkbp11	1.75921e-137	0.4926	0.628	0.391	3.51842e-134
Basp1	9.60322e-137	0.430738	0.646	0.388	1.92064e-133
Hsp90b1	1.75725e-136	0.444581	0.914	0.717	3.51451e-133
Nhp2	2.20258e-136	0.298565	0.699	0.454	4.40517e-133
Rfc4	2.63177e-136	0.42307	0.449	0.281	5.26355e-133
Hmgb3	2.69698e-136	0.465966	0.498	0.295	5.39395e-133
Dbf4	2.00988e-135	0.515374	0.388	0.167	4.01975e-132
Arhgap11a	1.74795e-133	0.440903	0.354	0.138	3.49589e-130
Clspn	3.9885e-132	0.486884	0.381	0.171	7.97699e-129
Npm3	1.16626e-131	0.356981	0.653	0.422	2.33251e-128
Ddx39	8.46978e-131	0.4239	0.512	0.321	1.69396e-127
Mcm7	5.31175e-130	0.424837	0.441	0.267	1.06235e-126
Lyar	5.95979e-129	0.328317	0.574	0.362	1.19196e-125
Uhrf1	1.49805e-128	0.398102	0.392	0.185	2.9961e-125
Tcf19	1.7144e-128	0.510757	0.417	0.236	3.42879e-125
Rfc5	3.42753e-127	0.503207	0.442	0.255	6.85505e-124
Postn	1.28155e-126	0.3014	0.727	0.473	2.56309e-123
Fbxo5	1.90658e-125	0.361687	0.354	0.175	3.81316e-122
Prim1	2.85134e-124	0.34965	0.403	0.249	5.70267e-121
Vdac1	1.04154e-122	0.301803	0.676	0.43	2.08308e-119
Cacybp	2.94416e-121	0.320353	0.65	0.43	5.88832e-118
Mcm6	5.3812e-121	0.456658	0.416	0.247	1.07624e-117
Cd44	5.66427e-121	0.537578	0.501	0.304	1.13285e-117
Tmem119	4.43694e-119	0.419974	0.509	0.286	8.87387e-116
Hat1	4.34387e-118	0.414009	0.463	0.3	8.68775e-115
Adam12	1.17773e-117	0.410337	0.539	0.346	2.35545e-114
Mif	3.33458e-117	0.428046	0.75	0.516	6.66915e-114
Pa2g4	4.86414e-117	0.254428	0.603	0.383	9.72829e-114
Sdc1	3.48153e-115	0.471216	0.495	0.329	6.96307e-112
Prmt1	7.38901e-115	0.22244	0.641	0.415	1.4778e-111
H2-Q7	1.54217e-114	0.648277	0.668	0.518	3.08434e-111
Dhfr	3.13043e-113	0.414177	0.397	0.239	6.26086e-110
Cotl1	3.93806e-113	0.300235	0.625	0.415	7.87612e-110
Lgmn	6.17432e-112	0.361753	0.611	0.38	1.23486e-108
Hist1h1e	2.35396e-111	0.73826	0.484	0.362	4.70791e-108
Calr	1.62801e-109	0.47748	0.862	0.722	3.25602e-106
Arl6ip1	4.40496e-109	0.818574	0.775	0.604	8.80992e-106
Kdelr2	1.02311e-106	0.484046	0.669	0.464	2.04622e-103
Creld2	2.86588e-106	0.346967	0.539	0.363	5.73175e-103
Pdlim4	6.08024e-106	0.335494	0.55	0.336	1.21605e-102
Pgk1	1.20179e-105	0.304762	0.71	0.491	2.40358e-102
Uhrf2	3.38923e-105	0.300506	0.54	0.338	6.77846e-102
Ncapg2	6.07252e-100	0.405466	0.39	0.239	1.2145e-96
Tmem176b	9.96468e-100	0.482543	0.72	0.554	1.99294e-96
Pdia4	1.08806e-99	0.259047	0.628	0.418	2.17612e-96
2022-03-05	1.49462e-97	0.298734	0.659	0.463	2.98924e-94
Nasp	6.30907e-97	0.369088	0.515	0.352	1.26181e-93
Zbp1	1.82017e-96	0.400742	0.495	0.311	3.64034e-93
Srm	1.00293e-94	0.300225	0.629	0.438	2.00585e-91
Npc2	6.9459e-93	0.483199	0.826	0.708	1.38918e-89
Tmem176a	5.46945e-90	0.500733	0.645	0.478	1.09389e-86
Cenpw	5.81611e-90	0.52144	0.385	0.217	1.16322e-86
Ppp1r14b	6.9711e-90	0.221838	0.76	0.534	1.39422e-86
Slc25a5	1.45592e-89	0.281032	0.776	0.605	2.91184e-86
Cxcl10	2.70437e-88	0.733693	0.527	0.374	5.40873e-85
Mthfd2	2.33764e-87	0.364069	0.428	0.305	4.67527e-84
Tubb2b	9.55913e-87	0.331631	0.399	0.251	1.91183e-83
Lrrc15	1.8999e-86	0.310006	0.252	0.095	3.79981e-83
Nop58	3.44989e-85	0.28538	0.585	0.43	6.89977e-82
Tnfaip6	5.22948e-85	0.294891	0.689	0.507	1.0459e-81
Ccl7	1.25614e-82	0.61946	0.596	0.446	2.51228e-79
Csrp2	1.55802e-82	0.288685	0.695	0.485	3.11605e-79
Chaf1b	3.58273e-82	0.30252	0.325	0.164	7.16545e-79
Hells	6.4604e-80	0.379964	0.34	0.177	1.29208e-76
Orc6	3.57939e-79	0.234845	0.464	0.327	7.15878e-76
Rbp1	1.04897e-78	0.235121	0.518	0.348	2.09794e-75
Cit	3.32685e-78	0.329576	0.314	0.134	6.65371e-75
Pgam1	1.56096e-77	0.216307	0.713	0.506	3.12191e-74
Ptn	2.28139e-77	0.260797	0.333	0.176	4.56278e-74
Tnfrsf12a	1.58105e-75	0.279482	0.467	0.346	3.16211e-72
Gapdh	2.09486e-73	0.212249	0.718	0.52	4.18971e-70
Cited1	2.2971e-73	0.213085	0.316	0.197	4.59419e-70
Hist1h4i	2.39356e-73	0.357728	0.365	0.231	4.78711e-70
Phgdh	9.32404e-72	0.209257	0.511	0.379	1.86481e-68
Ncl	7.3087e-71	0.23721	0.76	0.586	1.46174e-67
Isg15	1.97611e-70	0.431793	0.684	0.562	3.95221e-67
Cxcl5	1.3007e-69	0.502859	0.264	0.096	2.6014e-66
Mcm5	1.09583e-68	0.421631	0.388	0.259	2.19166e-65
Lypd1	2.24151e-67	0.402096	0.434	0.3	4.48303e-64
Irf7	6.07288e-67	0.285731	0.582	0.419	1.21458e-63
Syce2	6.89241e-67	0.350599	0.369	0.257	1.37848e-63
Col1a1	9.65703e-67	0.329917	0.794	0.62	1.93141e-63
Ccne1	3.10227e-66	0.240577	0.306	0.158	6.20454e-63
Olfml3	4.46326e-66	0.250814	0.522	0.357	8.92652e-63
Cenpk	6.04913e-66	0.321263	0.305	0.158	1.20983e-62
Haus8	2.10404e-65	0.269116	0.336	0.231	4.20808e-62
Hspa5	2.35884e-63	0.316216	0.854	0.725	4.71768e-60
Ctsc	4.19523e-61	0.416349	0.424	0.291	8.39046e-58
Mcm3	1.33661e-57	0.383678	0.367	0.27	2.67322e-54
Pycard	1.45697e-57	0.28605	0.486	0.357	2.91395e-54
Crip1	9.03859e-56	0.309273	0.826	0.662	1.80772e-52
H19	2.74484e-55	0.337283	0.333	0.215	5.48968e-52
Eif4a1	6.73726e-55	0.249806	0.813	0.687	1.34745e-51
Tuba1c	1.41225e-53	0.285074	0.336	0.242	2.82449e-50
S100a10	2.33895e-53	0.471932	0.834	0.723	4.67789e-50
Vcam1	3.60719e-52	0.221886	0.53	0.4	7.21439e-49
Cyp1b1	1.23343e-51	0.257698	0.535	0.388	2.46685e-48
Oasl2	1.24381e-51	0.238018	0.445	0.328	2.48761e-48
Cxcl9	3.05365e-51	0.56157	0.536	0.431	6.10729e-48
Cbx3	5.15588e-51	0.27876	0.526	0.375	1.03118e-47
Ass1	2.71875e-48	0.228811	0.379	0.285	5.43749e-45
Psat1	1.06431e-46	0.329456	0.396	0.294	2.12861e-43
Ldha	1.05789e-44	0.248769	0.763	0.652	2.11579e-41
Mcm2	1.6532e-44	0.271891	0.337	0.24	3.30639e-41
Anxa1	2.57311e-43	0.203255	0.72	0.568	5.14622e-40
Hspa8	1.68192e-42	0.201253	0.862	0.773	3.36384e-39
Thbs2	4.88997e-42	0.378157	0.445	0.321	9.77993e-39
Psrc1	1.38226e-41	0.382727	0.269	0.103	2.76451e-38
Tubb3	4.82709e-41	0.266283	0.293	0.201	9.65418e-38
H2-Q6	1.04145e-40	0.397163	0.479	0.395	2.0829e-37
Spp1	8.50722e-40	0.615783	0.25	0.131	1.70144e-36
Lox	6.04073e-39	0.334027	0.428	0.325	1.20815e-35
Col18a1	3.24823e-34	0.266976	0.501	0.408	6.49647e-31
Bmper	1.12504e-33	0.208968	0.525	0.422	2.25007e-30
Sox11	1.27513e-32	0.267832	0.291	0.186	2.55027e-29
Gas7	2.72604e-31	0.222228	0.388	0.285	5.45209e-28
Cxcl16	2.41143e-28	0.214261	0.408	0.329	4.82287e-25
Cdt1	5.91284e-27	0.208321	0.283	0.205	1.18257e-23
Ptx3	1.11138e-26	0.307888	0.423	0.35	2.22276e-23
Lrrc17	1.61401e-26	0.270639	0.456	0.362	3.22802e-23
Mcub	8.17056e-24	0.355744	0.329	0.265	1.63411e-20
Col12a1	2.38134e-23	0.224343	0.32	0.262	4.76267e-20
Ccl8	2.16071e-21	0.244262	0.326	0.246	4.32143e-18
Ubd	1.815e-20	0.427699	0.285	0.17	3.62999e-17
Fgf10	3.43795e-20	0.239658	0.37	0.315	6.87591e-17
Mfap5	9.14803e-20	0.201776	0.646	0.578	1.82961e-16
Spon2	1.50827e-15	0.319468	0.321	0.264	3.01655e-12
Thbs1	1.34761e-13	0.216446	0.358	0.326	2.69522e-10
Saa3	5.75223e-11	0.826057	0.346	0.321	1.15045e-07
Plac8	1.20307e-10	0.265549	0.419	0.383	2.40615e-07
Ung	7.23357e-08	0.20945	0.242	0.207	0.000144671
Nov	1.25188e-06	0.330166	0.223	0.172	0.00250376

## Sheet: Immune
	p_val	avg_logFC	pct.1	pct.2	p_val_adj
H2-Eb1	0	3.39328	0.614	0.277	0
Cd52	0	2.78836	0.781	0.131	0
Rgs2	0	2.74991	0.713	0.285	0
Ccl4	0	2.66276	0.423	0.053	0
Coro1a	0	2.55255	0.79	0.127	0
Areg	0	2.44344	0.467	0.078	0
Nkg7	0	2.34302	0.522	0.055	0
Rac2	0	2.2661	0.666	0.08	0
Ltb	0	2.12551	0.549	0.043	0
Tyrobp	0	2.10639	0.593	0.063	0
Laptm5	0	2.09514	0.69	0.046	0
Rgs1	0	2.06341	0.499	0.057	0
Ptprcap	0	2.05279	0.571	0.071	0
Trbc2	0	2.02922	0.473	0.048	0
Fcer1g	0	2.01802	0.526	0.109	0
Pim1	0	1.99187	0.709	0.297	0
Tmsb4x	0	1.95475	0.981	0.672	0
Ccl3	0	1.87662	0.345	0.023	0
Gzma	0	1.87024	0.391	0.063	0
Ptprc	0	1.86299	0.646	0.031	0
Cd53	0	1.85803	0.581	0.053	0
Selplg	0	1.83053	0.605	0.15	0
Gzmb	0	1.82294	0.352	0.024	0
Dennd4a	0	1.77462	0.605	0.216	0
Ccr2	0	1.69719	0.507	0.026	0
Srgn	0	1.68346	0.849	0.422	0
Lcp1	0	1.67819	0.588	0.086	0
Il7r	0	1.67575	0.443	0.024	0
Lyz2	0	1.67148	0.479	0.119	0
Ptpn18	0	1.66938	0.6	0.182	0
Xcl1	0	1.66921	0.379	0.026	0
Ms4a4b	0	1.57399	0.453	0.093	0
Arhgdib	0	1.55805	0.683	0.2	0
Sub1	0	1.55648	0.849	0.586	0
Sh3bgrl3	0	1.55524	0.922	0.655	0
Traf1	0	1.51588	0.525	0.077	0
Alox5ap	0	1.49727	0.481	0.086	0
Tnfrsf18	0	1.49364	0.45	0.051	0
Ctss	0	1.48853	0.46	0.059	0
Cd37	0	1.47568	0.521	0.04	0
Klrk1	0	1.43106	0.496	0.023	0
Cytip	0	1.40685	0.477	0.024	0
Slc38a1	0	1.39583	0.491	0.022	0
Skap1	0	1.32147	0.336	0.014	0
Il2rb	0	1.30783	0.413	0.06	0
Ccr7	0	1.29369	0.379	0.025	0
Cxcr6	0	1.25867	0.318	0.002	0
Itk	0	1.25676	0.348	0.003	0
Napsa	0	1.20405	0.523	0.034	0
Arg1	0	1.19506	0.302	0.035	0
Gpr132	0	1.18549	0.47	0.023	0
Klrd1	0	1.06599	0.379	0.04	0
Csf2	0	0.998135	0.292	0.024	0
Klre1	0	0.998002	0.273	0.013	0
Bcl2a1b	0	0.988087	0.405	0.013	0
Itgb2	0	0.977521	0.456	0.045	0
Ctsw	0	0.974187	0.39	0.008	0
Spi1	0	0.962095	0.348	0.025	0
Cyth4	0	0.957604	0.398	0.005	0
Ramp3	0	0.912447	0.522	0.092	0
Stat4	0	0.891574	0.387	0.006	0
Ptpn6	0	0.877248	0.469	0.09	0
Aif1	0	0.852989	0.248	0.034	0
Cd28	0	0.840267	0.317	0.024	0
Ms4a6b	0	0.838837	0.388	0.025	0
Ccdc184	0	0.806902	0.384	0.034	0
Klrb1c	0	0.757068	0.243	0.013	0
Ly86	0	0.744642	0.371	0.024	0
Ncr1	0	0.660103	0.261	0.001	0
Klra7	0	0.651079	0.319	0.004	0
Prf1	0	0.601733	0.306	0	0
Klrb1b	0	0.569159	0.378	0.013	0
Tcrg-C1	0	0.562042	0.265	0.003	0
Cst7	0	0.556095	0.341	0.001	0
Tnfsf11	0	0.540955	0.303	0.016	0
Bcl2a1d	0	0.521432	0.45	0.007	0
Ccr5	0	0.516871	0.357	0.01	0
Cd3e	0	0.501629	0.287	0.002	0
Gna15	0	0.494695	0.362	0.012	0
Osm	0	0.489955	0.334	0.009	0
Clec12a	0	0.476706	0.253	0.001	0
Cd244	0	0.451624	0.264	0.009	0
Sh2d1a	0	0.44992	0.24	0.013	0
Klrb1f	0	0.409361	0.22	0	0
Klrc1	0	0.401385	0.294	0	0
Tnfrsf9	0	0.382979	0.33	0.017	0
Ccl1	0	0.373338	0.204	0.01	0
Klrb1a	0	0.314483	0.228	0.009	0
Samd3	0	0.302859	0.208	0	0
Btla	0	0.290534	0.306	0.004	0
Nlrp3	0	0.265764	0.279	0.01	0
Scimp	0	0.261094	0.233	0	0
Gp9	0	0.255645	0.4	0.066	0
Gzmc	0	0.23293	0.209	0	0
Pdcd1	0	0.232444	0.319	0.002	0
Krt83	0	0.230625	0.272	0.005	0
Ctla4	0	0.220177	0.36	0.002	0
Trat1	0	0.212462	0.259	0.015	0
Gmfg	8.76609e-301	1.5978	0.518	0.118	1.75322e-297
Arl5c	3.31981e-295	0.684969	0.462	0.143	6.63963e-292
Hcst	3.87337e-293	1.34327	0.391	0.014	7.74673e-290
Cxcr3	1.76907e-280	0.531021	0.217	0	3.53815e-277
Cd74	7.31872e-278	4.42603	0.572	0.241	1.46374e-274
Ccl5	5.56189e-272	3.03636	0.544	0.244	1.11238e-268
Gimap7	1.44385e-270	0.654935	0.262	0.004	2.8877e-267
Cd48	6.78609e-266	1.17926	0.406	0.019	1.35722e-262
Vps37b	4.17328e-265	1.91069	0.544	0.199	8.34655e-262
Serpina3g	1.48703e-263	0.824894	0.399	0.069	2.97406e-260
Cd3g	3.58447e-262	1.25228	0.304	0.004	7.16893e-259
Ms4a4c	4.15081e-261	0.571405	0.271	0.012	8.30163e-258
Actg1	5.4338e-260	1.204	0.907	0.761	1.08676e-256
Cd83	4.49479e-257	1.19883	0.461	0.133	8.98957e-254
Crem	9.14444e-257	1.42715	0.585	0.292	1.82889e-253
Tnfaip3	8.79581e-255	2.06483	0.561	0.253	1.75916e-251
Rnase6	2.92571e-246	0.903196	0.254	0.041	5.85141e-243
Sla	1.8502e-240	0.927493	0.377	0.024	3.7004e-237
Fam49b	6.22285e-240	1.13712	0.574	0.274	1.24457e-236
Txk	5.83801e-226	0.716708	0.297	0.035	1.1676e-222
Jaml	3.52843e-224	0.739645	0.276	0.009	7.05685e-221
Ncf4	5.76317e-224	0.667214	0.367	0.026	1.15263e-220
Cd300a	1.07059e-219	0.290083	0.303	0.045	2.14118e-216
Dusp2	3.20754e-214	0.833174	0.437	0.123	6.41509e-211
Ms4a6c	3.50093e-212	0.573585	0.202	0.007	7.00186e-209
Il21r	5.94192e-212	0.344181	0.213	0.008	1.18838e-208
Ppbp	5.65887e-211	0.669882	0.348	0.088	1.13177e-207
H2-Ab1	4.86204e-210	3.68705	0.558	0.269	9.72409e-207
Hcls1	1.6819e-202	1.08217	0.451	0.085	3.3638e-199
Pkib	2.54177e-197	0.53826	0.217	0.036	5.08353e-194
Tagln2	1.99786e-196	0.938843	0.8	0.621	3.99573e-193
Plek	1.13754e-194	0.871446	0.429	0.112	2.27508e-191
Actb	2.80993e-194	1.53256	0.651	0.351	5.61985e-191
Fyb	1.75269e-193	1.31648	0.478	0.186	3.50538e-190
Irf8	2.67804e-188	2.0368	0.515	0.236	5.35608e-185
Phf11b	1.43889e-186	0.665718	0.463	0.182	2.87777e-183
Lsp1	1.16032e-185	1.50724	0.628	0.376	2.32065e-182
Tespa1	2.22597e-184	1.26599	0.373	0.038	4.45194e-181
Cotl1	8.37433e-184	1.23124	0.642	0.413	1.67487e-180
Nr4a1	8.13406e-181	1.40953	0.66	0.421	1.62681e-177
Rgs18	2.34394e-180	0.48185	0.335	0.024	4.68787e-177
Id2	4.45794e-179	1.38565	0.671	0.479	8.91589e-176
Rrad	8.13723e-178	0.910887	0.531	0.298	1.62745e-174
Ikzf3	4.52419e-177	0.746595	0.288	0.002	9.04837e-174
Il2rg	7.20694e-177	1.51498	0.467	0.125	1.44139e-173
Ltb4r1	2.32356e-172	0.92299	0.353	0.041	4.64712e-169
Itgb7	6.15425e-172	1.19778	0.474	0.125	1.23085e-168
Sh2d2a	5.25404e-168	0.690553	0.304	0.011	1.05081e-164
Wfdc17	2.57467e-166	0.426272	0.224	0.038	5.14934e-163
Hspa8	1.99268e-165	0.875039	0.9	0.77	3.98535e-162
Cd79b	2.42589e-164	0.514641	0.267	0.007	4.85178e-161
Dusp5	6.08486e-162	1.40089	0.516	0.273	1.21697e-158
Neurl3	2.00499e-160	1.42188	0.426	0.112	4.00998e-157
Gimap5	9.7043e-159	0.914972	0.41	0.147	1.94086e-155
Emb	7.74201e-150	1.90143	0.491	0.211	1.5484e-146
Cd7	1.52273e-149	1.18111	0.282	0.048	3.04546e-146
Samsn1	2.96701e-148	1.51122	0.429	0.094	5.93402e-145
Csrnp1	4.35012e-147	1.25522	0.5	0.259	8.70025e-144
Cnn2	8.93738e-140	1.02252	0.568	0.307	1.78748e-136
Hilpda	1.50978e-139	1.42168	0.504	0.281	3.01956e-136
Ctla2a	4.50378e-139	1.0273	0.563	0.328	9.00755e-136
Lat2	9.66291e-135	0.768236	0.356	0.039	1.93258e-131
Calca	2.89504e-130	0.870756	0.307	0.073	5.79007e-127
H2afz	1.73196e-129	1.03912	0.75	0.571	3.46391e-126
Il1rl1	7.61229e-127	1.08768	0.328	0.081	1.52246e-123
Ccl6	5.66392e-126	1.38537	0.253	0.066	1.13278e-122
Spint2	5.95744e-126	0.701548	0.407	0.109	1.19149e-122
Hdc	4.48841e-123	0.523888	0.35	0.111	8.97682e-120
H2-Aa	2.26832e-122	3.72836	0.47	0.231	4.53664e-119
H2-Q7	2.55456e-119	0.96147	0.665	0.517	5.10911e-116
Itga4	1.19663e-117	0.838277	0.363	0.041	2.39325e-114
Ptpn22	2.58901e-115	0.881719	0.329	0.02	5.17802e-112
Slamf7	3.10209e-112	0.593496	0.239	0.009	6.20417e-109
Pglyrp1	9.01959e-111	0.673297	0.402	0.143	1.80392e-107
Cd3d	1.0398e-107	0.91006	0.222	0.004	2.07961e-104
Fermt3	1.39855e-107	0.910377	0.36	0.039	2.79709e-104
Cd69	1.45912e-106	1.29645	0.339	0.02	2.91825e-103
S100a4	3.10799e-104	1.27396	0.45	0.221	6.21598e-101
Trbc1	1.017e-102	1.36866	0.322	0.034	2.03401e-99
Tuba4a	1.73571e-102	0.917315	0.436	0.24	3.47141e-99
Icos	1.93801e-99	0.921534	0.29	0.021	3.87601e-96
Lpcat2	1.78899e-96	0.906684	0.385	0.131	3.57797e-93
Epsti1	1.98458e-96	1.45062	0.411	0.096	3.96916e-93
Stk17b	2.68668e-95	1.50791	0.468	0.232	5.37336e-92
Dgat1	1.48823e-94	0.385869	0.474	0.298	2.97647e-91
Lef1	2.77971e-93	0.344876	0.237	0.009	5.55942e-90
Taldo1	7.56161e-93	0.673014	0.696	0.536	1.51232e-89
Hs3st1	7.95767e-93	0.579873	0.359	0.168	1.59153e-89
Serpinb9	4.64463e-91	0.584688	0.477	0.291	9.28927e-88
Apobec3	4.35347e-89	1.03761	0.504	0.301	8.70694e-86
Pycard	5.28875e-88	0.618689	0.546	0.354	1.05775e-84
Gimap3	4.41426e-87	1.26245	0.311	0.047	8.82851e-84
Hmgb2	1.44914e-86	1.23171	0.575	0.41	2.89828e-83
Lgals3	7.20889e-85	1.59526	0.49	0.286	1.44178e-81
Tesc	1.61987e-83	0.367307	0.325	0.109	3.23974e-80
Nr4a3	1.15009e-82	0.911457	0.43	0.227	2.30018e-79
H2-DMb1	4.1263e-82	1.32524	0.408	0.167	8.25261e-79
Ucp2	4.29467e-82	1.08897	0.495	0.268	8.58934e-79
Lmnb1	6.55462e-82	0.480016	0.467	0.277	1.31092e-78
Cxcl2	4.96013e-81	1.22385	0.4	0.233	9.92025e-78
H2-K1	1.06147e-79	0.571442	0.832	0.761	2.12294e-76
Pmaip1	5.63499e-79	0.905975	0.365	0.115	1.127e-75
Rel	5.7517e-79	1.04269	0.449	0.252	1.15034e-75
Cd82	4.65683e-78	1.14752	0.437	0.211	9.31366e-75
H2-Ob	5.78613e-77	0.483686	0.225	0.017	1.15723e-73
Arhgap45	8.12243e-76	1.16214	0.387	0.089	1.62449e-72
Gimap6	3.93972e-74	0.821002	0.48	0.317	7.87943e-71
Gm20186	8.79576e-74	0.689307	0.287	0.089	1.75915e-70
Trim30a	3.59599e-72	0.330191	0.496	0.315	7.19198e-69
Pf4	5.77949e-71	0.60389	0.343	0.138	1.1559e-67
Iqgap2	1.37876e-70	0.462235	0.377	0.143	2.75752e-67
Myo1g	7.3447e-70	0.795665	0.348	0.056	1.46894e-66
AW112010	1.29375e-69	1.05066	0.689	0.552	2.5875e-66
St8sia4	1.06383e-68	0.820822	0.403	0.123	2.12767e-65
Cd86	4.23926e-65	0.525557	0.21	0.005	8.47851e-62
Pde4b	2.78041e-63	0.248683	0.21	0.284	5.56083e-60
Ifitm1	2.14669e-62	0.991566	0.242	0.159	4.29339e-59
Slc3a2	5.24735e-58	0.610167	0.543	0.402	1.04947e-54
2022-09-06	1.56374e-57	0.840242	0.455	0.272	3.12749e-54
Nfkbid	2.32536e-57	1.33177	0.366	0.073	4.65072e-54
Relb	7.7987e-57	0.468026	0.422	0.27	1.55974e-53
Glipr1	1.1183e-56	0.817804	0.338	0.055	2.2366e-53
Mpeg1	2.48429e-56	0.850084	0.21	0.055	4.96859e-53
Stat1	5.20298e-56	0.413719	0.539	0.394	1.0406e-52
Myo1f	8.72961e-56	0.384832	0.273	0.022	1.74592e-52
Lilr4b	2.49283e-55	0.517818	0.275	0.001	4.98566e-52
Cd226	3.80038e-55	0.45731	0.271	0.018	7.60076e-52
H2afx	4.72983e-55	0.539452	0.439	0.284	9.45965e-52
AC163354.1	1.50943e-54	0.45571	0.268	0.008	3.01886e-51
Gata3	2.29971e-51	1.68333	0.361	0.201	4.59942e-48
Phf11a	3.92531e-50	0.257956	0.214	0.037	7.85061e-47
Ldha	4.65237e-50	0.415942	0.773	0.651	9.30474e-47
Serpinb6b	2.01081e-47	0.917711	0.346	0.108	4.02163e-44
Bambi	8.60182e-46	0.215225	0.225	0.298	1.72036e-42
Tspan32	4.13187e-45	0.993538	0.317	0.096	8.26373e-42
Slfn2	2.48759e-44	0.788868	0.367	0.172	4.97517e-41
Ramp1	4.59577e-43	1.01764	0.399	0.197	9.19154e-40
Gadd45b	9.06393e-43	1.44635	0.595	0.535	1.81279e-39
H2-DMa	3.10176e-40	1.58555	0.39	0.165	6.20353e-37
Slc25a5	4.41147e-40	0.244884	0.727	0.606	8.82293e-37
Fam110a	4.95058e-38	0.511828	0.226	0.208	9.90117e-35
Hnrnpa1	5.26467e-37	0.343964	0.683	0.564	1.05293e-33
Xlr4a	6.20127e-36	0.311374	0.253	0.037	1.24025e-32
Rab7b	7.53215e-36	0.361455	0.32	0.214	1.50643e-32
Npm1	1.10973e-35	0.361928	0.746	0.67	2.21946e-32
Ighm	6.53819e-35	1.76139	0.424	0.224	1.30764e-31
Nr4a2	4.15355e-33	1.09895	0.423	0.264	8.30711e-30
Cdkn1a	6.39817e-33	0.396592	0.607	0.497	1.27963e-29
Spry2	1.1262e-32	0.255074	0.173	0.259	2.25241e-29
Asb2	7.4839e-32	0.224938	0.204	0.019	1.49678e-28
Pde3b	8.91947e-32	0.265964	0.227	0.234	1.78389e-28
Rassf4	1.97757e-31	0.396614	0.228	0.089	3.95513e-28
Nrgn	5.56094e-29	0.684447	0.349	0.151	1.11219e-25
Lck	2.85989e-28	0.920393	0.285	0.077	5.71979e-25
Naaa	3.55643e-28	0.952362	0.444	0.334	7.11285e-25
Cd2	1.00043e-27	0.907486	0.26	0.051	2.00086e-24
Cbfa2t3	1.4043e-27	0.216651	0.373	0.236	2.80861e-24
Tm6sf1	7.87507e-27	0.427538	0.351	0.125	1.57501e-23
Crip1	6.17819e-26	0.38349	0.781	0.663	1.23564e-22
Irf7	3.35031e-25	0.241772	0.529	0.42	6.70062e-22
Lsr	7.46774e-25	0.239199	0.204	0.029	1.49355e-21
Acp5	1.19331e-23	0.269249	0.394	0.291	2.38662e-20
Adam8	3.56706e-22	0.452681	0.298	0.075	7.13412e-19
Sdf2l1	3.68862e-22	0.395711	0.477	0.359	7.37724e-19
Snx20	4.88606e-22	0.852918	0.323	0.061	9.77212e-19
Psmb9	6.61457e-22	0.724125	0.532	0.471	1.32291e-18
Cma1	1.11608e-21	2.0842	0.217	0.262	2.23217e-18
Marcksl1	1.70616e-21	0.922493	0.409	0.313	3.41233e-18
Smc4	5.64023e-21	0.479208	0.413	0.305	1.12805e-17
Plbd1	7.23993e-21	1.26329	0.223	0.089	1.44799e-17
B2m	1.25493e-20	0.217136	0.902	0.838	2.50987e-17
Hsph1	3.1599e-20	0.203654	0.383	0.271	6.31979e-17
Mthfd2	7.61741e-19	0.231639	0.411	0.305	1.52348e-15
Ddx39	1.89972e-18	0.212789	0.276	0.33	3.79945e-15
Cks2	1.14991e-17	0.270959	0.318	0.371	2.29982e-14
Tomm22	1.2146e-17	0.233282	0.615	0.531	2.4292e-14
Ctsc	2.17226e-17	0.369633	0.412	0.29	4.34453e-14
Pmf1	4.05853e-16	0.213247	0.391	0.303	8.11705e-13
Cxcl16	4.57471e-16	0.239014	0.236	0.336	9.14942e-13
Tcrg-C4	6.01915e-16	0.710035	0.226	0.013	1.20383e-12
H2-Q6	9.98455e-16	0.669537	0.465	0.395	1.99691e-12
Cst3	1.08548e-15	1.43945	0.684	0.749	2.17097e-12
Atad2	2.72414e-15	0.212349	0.25	0.268	5.44828e-12
Batf3	2.75265e-15	0.514771	0.227	0.114	5.5053e-12
Tnfaip8l2	6.9196e-15	0.597858	0.287	0.008	1.38392e-11
Ppp1r12a	7.37966e-15	0.39365	0.473	0.385	1.47593e-11
Efhd2	8.36551e-15	0.845457	0.402	0.279	1.6731e-11
Fgl2	2.83715e-14	0.422189	0.39	0.265	5.6743e-11
Pclaf	1.53094e-13	0.359366	0.261	0.317	3.06189e-10
Dok2	2.04378e-13	1.01358	0.303	0.039	4.08756e-10
Tbc1d4	2.82066e-13	0.47263	0.271	0.227	5.64132e-10
Npm3	4.75593e-13	0.368494	0.498	0.427	9.51186e-10
Tomm20	8.8075e-13	0.218307	0.611	0.542	1.7615e-09
Spp1	3.2321e-12	0.25139	0.224	0.131	6.4642e-09
Stmn1	7.46899e-12	0.399798	0.45	0.37	1.4938e-08
Arhgap30	8.16833e-12	1.00474	0.32	0.021	1.63367e-08
Runx3	8.39578e-12	0.687238	0.295	0.03	1.67916e-08
Tmem123	1.93098e-11	0.562246	0.474	0.396	3.86197e-08
Klk8	3.3202e-11	0.555143	0.299	0.1	6.64041e-08
Ahr	4.63126e-11	0.303356	0.33	0.149	9.26252e-08
Ly6c2	4.96883e-11	1.37159	0.224	0.112	9.93765e-08
Car2	5.09342e-11	0.342352	0.202	0.179	1.01868e-07
Cd24a	1.06201e-10	0.995868	0.294	0.168	2.12401e-07
Eif4a1	1.28874e-10	0.235321	0.739	0.689	2.57748e-07
Eif5a	1.3409e-10	0.243594	0.743	0.695	2.6818e-07
Gm2a	1.47438e-10	0.9568	0.379	0.285	2.94876e-07
Ncl	2.63566e-10	0.333428	0.62	0.591	5.27133e-07
Ifi47	3.88815e-10	0.216262	0.268	0.287	7.77631e-07
Gimap4	8.47251e-10	0.892825	0.334	0.214	1.6945e-06
Cadm1	1.00859e-09	0.344961	0.264	0.181	2.01718e-06
Gpr183	3.05444e-09	0.974271	0.286	0.022	6.10889e-06
Serpinb1a	4.6676e-09	0.770214	0.351	0.271	9.3352e-06
Unc119	5.81484e-09	0.728205	0.367	0.229	1.16297e-05
Dnajc15	5.96955e-09	0.339516	0.492	0.432	1.19391e-05
Dnajc9	8.41432e-09	0.34055	0.361	0.292	1.68286e-05
Inpp4b	5.16038e-08	0.768072	0.287	0.096	0.000103208
Cenpq	1.09786e-07	0.205157	0.339	0.251	0.000219571
Mcm3	2.46754e-07	0.206147	0.346	0.27	0.000493507
H2-Oa	3.8665e-07	0.64962	0.261	0.001	0.0007733
Ifi213	4.56644e-07	0.278307	0.221	0.067	0.000913288
Dek	5.26842e-07	0.320564	0.499	0.445	0.00105368
Lat	1.17273e-06	0.880194	0.216	0.031	0.00234546
Anp32b	1.67026e-06	0.341291	0.602	0.595	0.00334052
Gpr65	1.88201e-06	0.692097	0.261	0.006	0.00376401
Mcm5	3.65115e-06	0.227281	0.287	0.263	0.0073023
Tmpo	3.68292e-06	0.277317	0.351	0.368	0.00736584
Zbp1	3.86115e-06	0.22334	0.386	0.315	0.0077223
Cnp	6.15832e-06	0.213879	0.307	0.222	0.0123166
Ifi209	8.70357e-06	0.577037	0.248	0.025	0.0174071
Cd68	1.69888e-05	0.42559	0.277	0.248	0.0339776
Ifi206	3.11373e-05	0.349481	0.203	0.048	0.0622746
Tpsb2	4.58643e-05	1.75252	0.249	0.193	0.0917285
Syngr2	8.21313e-05	0.932067	0.392	0.326	0.164263
Rgcc	8.55922e-05	0.289605	0.583	0.582	0.171184
Fam105a	0.000135078	0.841109	0.322	0.114	0.270155
Ppt1	0.000152424	0.624061	0.375	0.315	0.304849
Ckb	0.00023878	0.24761	0.429	0.451	0.477561
Cd44	0.000432438	0.581188	0.375	0.308	0.864875
Uhrf2	0.000709728	0.528641	0.385	0.343	1
Lbh	0.000732771	0.216742	0.379	0.334	1
Ezh2	0.000956914	0.254161	0.319	0.254	1
Arl4c	0.00304389	0.652581	0.285	0.192	1
Cenpa	0.00336912	0.21807	0.341	0.337	1
Irf5	0.0113044	0.602012	0.304	0.139	1
Gpr171	0.016138	0.946518	0.296	0.042	1
Ccl9	0.0197837	0.780608	0.261	0.17	1
Gm26917	0.022889	0.363034	0.403	0.421	1
Set	0.0274112	0.302283	0.492	0.48	1
Nop56	0.0318603	0.225406	0.388	0.355	1
Eno3	0.0589435	0.376376	0.251	0.199	1
Ass1	0.095077	0.446026	0.323	0.287	1
Dut	0.118256	0.200302	0.389	0.353	1
Plac8	0.169157	0.759772	0.416	0.383	1
Top2a	0.171209	0.345698	0.314	0.219	1
Igkc	0.204274	2.2113	0.215	0.178	1
Cdc42ep3	0.302855	0.436479	0.326	0.252	1
Mki67	0.372753	0.301293	0.217	0.179	1
Evi2a	0.483126	0.741725	0.291	0.154	1
Fbl	0.860906	0.328173	0.407	0.399	1
Rangap1	0.891658	0.202566	0.304	0.27	1
Zfp36	0.905973	0.434705	0.547	0.572	1
Cdkn2d	0.908672	0.278128	0.327	0.302	1

## Sheet: Diff
	p_val	avg_logFC	pct.1	pct.2	p_val_adj
Car3	0	4.0801	0.948	0.34	0
Adipoq	0	2.53947	0.891	0.35	0
Hspd1	0	2.26395	0.941	0.429	0
Nnat	0	1.99195	0.662	0.356	0
Hspe1	0	1.8348	0.943	0.575	0
Cox5a	0	1.83315	0.938	0.521	0
Fabp5	0	1.82596	0.89	0.459	0
Gpd1	0	1.78827	0.821	0.373	0
Acsl1	0	1.7467	0.859	0.322	0
Idh3a	0	1.72308	0.898	0.388	0
Slc25a5	0	1.67043	0.944	0.587	0
Chchd10	0	1.66148	0.671	0.389	0
Rbp4	0	1.65301	0.85	0.357	0
Cyc1	0	1.65216	0.938	0.517	0
Dbi	0	1.63603	0.917	0.573	0
Atp5b	0	1.59195	0.969	0.659	0
Ndufab1	0	1.5876	0.946	0.523	0
Prkar2b	0	1.57343	0.911	0.386	0
Cox4i1	0	1.5413	0.963	0.661	0
Ak2	0	1.53278	0.894	0.384	0
G0s2	0	1.51319	0.843	0.47	0
Agpat2	0	1.48788	0.864	0.404	0
Atp5o.1	0	1.48091	0.93	0.558	0
Ran	0	1.47859	0.894	0.595	0
Mrpl12	0	1.47012	0.907	0.453	0
Mdh2	0	1.44595	0.933	0.538	0
Mcrip2	0	1.44374	0.873	0.377	0
Chchd2	0	1.43946	0.983	0.734	0
Hspa9	0	1.4387	0.917	0.423	0
Plin1	0	1.43596	0.813	0.28	0
Uqcrfs1	0	1.42899	0.917	0.501	0
Cebpa	0	1.41357	0.869	0.336	0
Cox8a	0	1.4028	0.972	0.653	0
Ndufb9	0	1.38123	0.945	0.602	0
Sod2	0	1.37996	0.919	0.513	0
Etfb	0	1.36556	0.918	0.527	0
C1qbp	0	1.3459	0.865	0.396	0
Atp5f1	0	1.3409	0.936	0.628	0
Phb2	0	1.34057	0.894	0.529	0
Mrap	0	1.33368	0.804	0.328	0
Phgdh	0	1.33312	0.796	0.354	0
Npm1	0	1.32493	0.895	0.658	0
Atp5a1	0	1.3249	0.938	0.611	0
Atp5d	0	1.32328	0.948	0.644	0
Aco2	0	1.32115	0.823	0.425	0
Pla2g16	0	1.31039	0.905	0.489	0
Scp2	0	1.3082	0.941	0.557	0
Uqcrq	0	1.30258	0.918	0.584	0
H2afz	0	1.27825	0.822	0.561	0
Ndufb10	0	1.27527	0.915	0.582	0
Mdh1	0	1.27507	0.822	0.488	0
Sdhd	0	1.25793	0.881	0.439	0
Tpi1	0	1.25741	0.899	0.511	0
Cycs	0	1.25733	0.857	0.432	0
Arxes2	0	1.22471	0.78	0.3	0
Nhp2	0	1.18824	0.856	0.435	0
Tomm20	0	1.18117	0.904	0.519	0
Uqcr11	0	1.17697	0.917	0.553	0
Eif4ebp1	0	1.17571	0.901	0.513	0
Ndufs7	0	1.16628	0.908	0.539	0
Aldoa	0	1.16078	0.957	0.643	0
Mif	0	1.15775	0.88	0.499	0
Uqcr10	0	1.15495	0.916	0.556	0
Mpc2	0	1.13052	0.914	0.59	0
Hadh	0	1.12852	0.881	0.458	0
Nme1	0	1.12596	0.903	0.589	0
Timm8a1	0	1.11374	0.789	0.316	0
Atp5h	0	1.11093	0.934	0.663	0
Lipe	0	1.10228	0.799	0.339	0
Tomm40	0	1.09554	0.832	0.402	0
Mrpl18	0	1.09553	0.866	0.45	0
Ifi27	0	1.09532	0.878	0.633	0
Grpel1	0	1.08964	0.87	0.421	0
Ldha	0	1.08711	0.958	0.634	0
Ndufa4	0	1.08515	0.936	0.638	0
Cox6b1	0	1.08509	0.923	0.605	0
Cluh	0	1.0821	0.757	0.278	0
Eif5a	0	1.08046	0.905	0.682	0
Adig	0	1.07734	0.688	0.354	0
Immt	0	1.07207	0.862	0.372	0
Cox7c	0	1.07015	0.946	0.63	0
Rrm2	0	1.0694	0.577	0.238	0
Ndufb6	0	1.0676	0.884	0.53	0
Ndufc2	0	1.0607	0.902	0.58	0
Mmd	0	1.06035	0.738	0.309	0
Cs	0	1.05975	0.845	0.389	0
Tomm5	0	1.05973	0.88	0.505	0
Pgam1	0	1.05968	0.892	0.486	0
Pnpla2	0	1.05777	0.821	0.41	0
Nnmt	0	1.05745	0.853	0.507	0
Cox7b	0	1.05696	0.882	0.534	0
Birc5	0	1.05376	0.627	0.296	0
Acadm	0	1.0515	0.788	0.454	0
Cidec	0	1.04719	0.57	0.317	0
Ndufb5	0	1.0467	0.917	0.576	0
Ncl	0	1.04471	0.843	0.574	0
Arxes1	0	1.03427	0.702	0.226	0
Atp5l	0	1.03391	0.93	0.637	0
Sdhb	0	1.03173	0.909	0.563	0
Uqcrc2	0	1.03079	0.829	0.436	0
Uqcrc1	0	1.02945	0.892	0.525	0
Cox5b	0	1.0286	0.903	0.56	0
Echs1	0	1.01498	0.884	0.45	0
Dctpp1	0	1.00992	0.789	0.331	0
Tmem120a	0	1.00434	0.754	0.35	0
Mtch2	0	1.00265	0.889	0.465	0
Ppp1r1a	0	1.00202	0.683	0.28	0
Pgk1	0	0.995263	0.865	0.472	0
Pclaf	0	0.990154	0.579	0.295	0
Mpc1	0	0.985443	0.882	0.559	0
Acadl	0	0.971645	0.791	0.418	0
Reep6	0	0.966707	0.662	0.187	0
Eno1	0	0.965878	0.831	0.403	0
Cebpb	0	0.962147	0.892	0.563	0
Dgat2	0	0.955336	0.562	0.294	0
Ndufv2	0	0.95311	0.879	0.541	0
Glrx5	0	0.952344	0.876	0.454	0
Atp1a2	0	0.948336	0.775	0.343	0
Cat	0	0.942406	0.796	0.364	0
Tk1	0	0.9384	0.619	0.171	0
Ndufa12	0	0.935221	0.884	0.509	0
Tst	0	0.934523	0.706	0.306	0
Mrpl20	0	0.934031	0.874	0.52	0
Slc36a2	0	0.933318	0.606	0.231	0
Ranbp1	0	0.931829	0.837	0.556	0
Ndufs2	0	0.928885	0.886	0.511	0
Cox7a2	0	0.926661	0.917	0.608	0
Hsp90aa1	0	0.924996	0.918	0.682	0
Ndufa8	0	0.921333	0.899	0.604	0
Cisd1	0	0.919674	0.873	0.43	0
Dgat1	0	0.918193	0.663	0.28	0
Mrpl42	0	0.912496	0.88	0.47	0
Top2a	0	0.899736	0.524	0.202	0
Anp32b	0	0.892002	0.825	0.579	0
Hmgb3	0	0.891533	0.686	0.274	0
Fh1	0	0.890571	0.796	0.369	0
Dlat	0	0.890315	0.741	0.319	0
Ldhb	0	0.889315	0.82	0.438	0
Cdca3	0	0.888148	0.62	0.236	0
Eif4a1	0	0.885916	0.898	0.676	0
Tkt	0	0.885639	0.871	0.512	0
Eci1	0	0.88119	0.842	0.462	0
Bola3	0	0.878948	0.864	0.454	0
Set	0	0.878262	0.819	0.456	0
Emc6	0	0.876664	0.849	0.39	0
Gsto1	0	0.874938	0.776	0.378	0
Atad3a	0	0.874205	0.729	0.299	0
Mrps36	0	0.870017	0.815	0.39	0
Timm50	0	0.863788	0.763	0.351	0
Mrpl34	0	0.86317	0.807	0.37	0
Chpt1	0	0.855604	0.741	0.435	0
Cox14	0	0.85194	0.882	0.522	0
Ppp1r14b	0	0.851498	0.888	0.517	0
Dnajc15	0	0.849679	0.821	0.407	0
Ndufaf4	0	0.848145	0.744	0.327	0
Suclg1	0	0.847716	0.82	0.48	0
Atp5j2	0	0.847116	0.891	0.61	0
Etfa	0	0.841026	0.836	0.516	0
Tufm	0	0.840978	0.748	0.323	0
Srm	0	0.84017	0.765	0.422	0
Cacybp	0	0.835255	0.787	0.412	0
Slc25a10	0	0.835208	0.648	0.272	0
Tomm22	0	0.833647	0.86	0.511	0
Dtymk	0	0.832208	0.777	0.403	0
Vdac1	0	0.827178	0.839	0.41	0
Ppa1	0	0.8233	0.82	0.442	0
Arl4a	0	0.823206	0.84	0.372	0
Atpaf2	0	0.819406	0.689	0.299	0
Taldo1	0	0.816203	0.833	0.521	0
Tcp1	0	0.814881	0.821	0.443	0
Pdhb	0	0.808843	0.771	0.336	0
Idh3b	0	0.804267	0.814	0.408	0
Cks2	0	0.802445	0.632	0.35	0
Timm10	0	0.800557	0.713	0.326	0
Ephx2	0	0.79856	0.637	0.322	0
Naa50	0	0.796954	0.794	0.423	0
Samm50	0	0.795332	0.795	0.363	0
2010107E04Rik	0	0.795099	0.844	0.515	0
Cct3	0	0.794842	0.813	0.451	0
Timm9	0	0.788717	0.699	0.317	0
Ube2s	0	0.782945	0.777	0.523	0
Prmt1	0	0.782331	0.784	0.397	0
Pcx	0	0.781318	0.572	0.237	0
1700037H04Rik	0	0.776817	0.66	0.267	0
Nudt19	0	0.774709	0.713	0.297	0
Timm17a	0	0.764335	0.836	0.454	0
Cks1b	0	0.759086	0.74	0.415	0
Dlst	0	0.758124	0.716	0.322	0
Uqcrb	0	0.757754	0.851	0.58	0
Mrpl15	0	0.753082	0.776	0.343	0
Gm45716	0	0.752818	0.571	0.222	0
Lpl	0	0.74404	0.96	0.683	0
Ube2c	0	0.740059	0.511	0.251	0
Adipor2	0	0.736474	0.726	0.299	0
Atp5k	0	0.735389	0.78	0.409	0
Selenoh	0	0.734369	0.761	0.4	0
Naa10	0	0.732947	0.759	0.33	0
1110008P14Rik	0	0.731277	0.699	0.388	0
Pa2g4	0	0.727692	0.744	0.365	0
Chchd3	0	0.724715	0.793	0.395	0
Npm3	0	0.722755	0.752	0.407	0
Fkbp4	0	0.721123	0.78	0.398	0
Mrpl55	0	0.716847	0.766	0.331	0
Cenpm	0	0.716734	0.591	0.19	0
Hnrnpa1	0	0.710324	0.809	0.552	0
Ndufc1	0	0.710299	0.851	0.529	0
Fam213a	0	0.699637	0.585	0.316	0
Prelid3b	0	0.698474	0.737	0.357	0
Tmem70	0	0.693984	0.722	0.311	0
Cdk1	0	0.693414	0.492	0.162	0
Usmg5	0	0.68891	0.812	0.456	0
Apex1	0	0.688043	0.676	0.328	0
Higd1a	0	0.68741	0.819	0.448	0
Slc25a19	0	0.686302	0.594	0.277	0
Dut	0	0.681401	0.654	0.333	0
Chchd4	0	0.678993	0.644	0.254	0
2022-03-05	0	0.678047	0.807	0.446	0
Comtd1	0	0.676264	0.653	0.319	0
Gmnn	0	0.663347	0.551	0.273	0
Dld	0	0.662836	0.733	0.345	0
Gnpat	0	0.661121	0.639	0.294	0
Lyar	0	0.660139	0.703	0.346	0
Nolc1	0	0.65574	0.669	0.324	0
Adrb3	0	0.655674	0.466	0.103	0
Cd1d1	0	0.655121	0.488	0.284	0
Cmbl	0	0.65274	0.675	0.302	0
Ppargc1b	0	0.65236	0.505	0.158	0
Lgals12	0	0.65203	0.525	0.145	0
Pank3	0	0.650082	0.604	0.291	0
Rrs1	0	0.649824	0.662	0.288	0
Vegfb	0	0.645079	0.658	0.325	0
Pmf1	0	0.644818	0.611	0.285	0
Mki67	0	0.643831	0.503	0.157	0
Gapdh	0	0.640004	0.836	0.505	0
Lrrc59	0	0.634857	0.746	0.373	0
Fitm2	0	0.634427	0.562	0.245	0
Nt5dc2	0	0.631842	0.591	0.249	0
Mrps18b	0	0.62691	0.666	0.295	0
Fcor	0	0.626521	0.45	0.204	0
Eif1ad	0	0.625154	0.644	0.309	0
Cdc20	0	0.623447	0.473	0.227	0
Snrpd1	0	0.620942	0.742	0.399	0
Cmc2	0	0.620504	0.671	0.306	0
Pde3b	0	0.61608	0.498	0.214	0
Fam13a	0	0.615876	0.47	0.22	0
Hspa8	0	0.61264	0.894	0.767	0
Rrm1	0	0.611296	0.556	0.276	0
Prps1	0	0.6095	0.584	0.282	0
Rsl1d1	0	0.605394	0.719	0.367	0
Fuom	0	0.595778	0.632	0.307	0
Coq5	0	0.595458	0.6	0.268	0
Smc4	0	0.595241	0.584	0.29	0
Nucks1	0	0.592336	0.793	0.449	0
Ndufa5	0	0.592309	0.792	0.476	0
Slc1a3	0	0.590443	0.575	0.255	0
Fabp4	0	0.589476	0.958	0.494	0
Siva1	0	0.583708	0.761	0.404	0
Kmt5a	0	0.580867	0.607	0.276	0
Stmn1	0	0.57775	0.607	0.356	0
Cdkn2c	0	0.573342	0.584	0.296	0
Tyms	0	0.570803	0.576	0.287	0
Mrpl41	0	0.563349	0.704	0.376	0
Eef1e1	0	0.562534	0.596	0.295	0
Ifrd2	0	0.56236	0.567	0.263	0
Fbl	0	0.560534	0.715	0.377	0
Mrto4	0	0.560117	0.597	0.335	0
Emc9	0	0.557922	0.643	0.337	0
Nop56	0	0.550286	0.651	0.335	0
Rangrf	0	0.549709	0.553	0.289	0
Ppif	0	0.534247	0.522	0.25	0
Lsm2	0	0.531323	0.665	0.335	0
Ccna2	0	0.528973	0.429	0.134	0
Hmgn5	0	0.526919	0.598	0.282	0
Mrps6	0	0.523825	0.662	0.327	0
Uhrf1	0	0.52351	0.438	0.175	0
Retsat	0	0.522735	0.542	0.27	0
Smoc1	0	0.514467	0.419	0.141	0
Ccnb2	0	0.50274	0.504	0.249	0
Nop58	0	0.495699	0.689	0.417	0
Spc24	0	0.492811	0.53	0.179	0
Mcm7	0	0.492741	0.505	0.257	0
Dkc1	0	0.490855	0.548	0.259	0
Rfc4	0	0.488367	0.504	0.272	0
Mrpl47	0	0.487812	0.507	0.246	0
Hist1h1b	0	0.477462	0.331	0.03	0
Orc6	0	0.476655	0.629	0.311	0
Prlr	0	0.475012	0.398	0.124	0
Kcnk3	0	0.473613	0.458	0.197	0
Hmmr	0	0.471885	0.407	0.072	0
Pbk	0	0.470452	0.447	0.113	0
Pimreg	0	0.470213	0.433	0.094	0
Esco2	0	0.469814	0.383	0.062	0
Asf1b	0	0.464909	0.427	0.158	0
Slc19a1	0	0.458608	0.449	0.19	0
Aoc3	0	0.455452	0.662	0.342	0
Wdr12	0	0.447735	0.482	0.246	0
Shmt1	0	0.445777	0.455	0.114	0
Ezh2	0	0.445547	0.475	0.241	0
Mtfp1	0	0.445139	0.441	0.185	0
Ccnb1	0	0.43737	0.41	0.112	0
Dnajc9	0	0.426161	0.566	0.275	0
Knstrn	0	0.422078	0.452	0.194	0
Pparg	0	0.411755	0.752	0.417	0
Spc25	0	0.40745	0.399	0.121	0
Ddx39	0	0.399622	0.589	0.309	0
A530016L24Rik	0	0.398487	0.384	0.125	0
Car2	0	0.395986	0.414	0.163	0
Ndrg2	0	0.390489	0.622	0.321	0
Acvr1c	0	0.336974	0.26	0.054	0
Rgcc	0	0.293876	0.846	0.563	0
Plk1	0	0.289581	0.353	0.112	0
Knl1	0	0.246502	0.322	0.075	0
Mis18bp1	0	0.21096	0.304	0.075	0
Ncapg	0	0.20565	0.261	0.048	0
Sgo2a	0	0.202492	0.311	0.063	0
Cenpa	4.68793e-305	0.608679	0.531	0.324	9.37586e-302
Cenpw	1.51781e-302	0.467835	0.444	0.207	3.03562e-299
Hells	1.05024e-294	0.420364	0.387	0.168	2.10049e-291
Gins2	7.41966e-294	0.463187	0.471	0.247	1.48393e-290
Kif22	5.56798e-291	0.234594	0.32	0.094	1.1136e-287
Tfrc	3.09569e-290	0.376644	0.397	0.185	6.19137e-287
Hmgb2	2.43495e-287	0.76348	0.63	0.402	4.8699e-284
Cenpf	3.21866e-283	0.505458	0.406	0.148	6.43732e-280
Cdca8	1.58029e-282	0.526056	0.456	0.226	3.16057e-279
Mad2l1	7.77676e-282	0.318552	0.398	0.188	1.55535e-278
Nasp	3.27724e-276	0.385531	0.574	0.343	6.55448e-273
Cdkn3	2.33702e-274	0.274045	0.395	0.176	4.67403e-271
Fam213b	1.21852e-269	0.42361	0.496	0.28	2.43703e-266
H2afx	3.52153e-269	0.478999	0.496	0.276	7.04305e-266
Apoe	1.66355e-267	0.316653	0.809	0.562	3.3271e-264
Hsph1	2.15709e-267	0.357887	0.473	0.261	4.31418e-264
Hat1	6.33294e-267	0.347051	0.487	0.293	1.26659e-263
Ppargc1a	2.19218e-261	0.459196	0.37	0.149	4.38436e-258
Cox7a1	2.30101e-261	0.761764	0.542	0.33	4.60202e-258
Lig1	1.45761e-259	0.3789	0.431	0.248	2.91523e-256
Ffar4	1.29571e-257	0.311536	0.344	0.126	2.59141e-254
Rangap1	4.30195e-256	0.368873	0.47	0.257	8.60391e-253
Kif11	7.80269e-255	0.232268	0.295	0.103	1.56054e-251
Mcm6	1.131e-252	0.390507	0.428	0.241	2.26199e-249
Mcm5	1.03723e-249	0.411288	0.441	0.251	2.07446e-246
Plin4	2.63012e-244	0.486804	0.404	0.175	5.26024e-241
Smc2	7.79234e-241	0.569574	0.515	0.318	1.55847e-237
Retn	6.9552e-239	1.3808	0.475	0.316	1.39104e-235
Ung	1.97882e-232	0.409698	0.384	0.195	3.95763e-229
Ccne1	1.20197e-230	0.313499	0.36	0.149	2.40393e-227
Tmpo	2.54427e-227	0.215213	0.572	0.353	5.08853e-224
Hp	8.323e-227	2.01697	0.561	0.409	1.6646e-223
Slfn9	4.99675e-226	0.437234	0.446	0.254	9.99351e-223
Me1	4.09847e-224	0.569407	0.47	0.3	8.19694e-221
Hmgn2	1.95013e-223	0.365726	0.585	0.383	3.90026e-220
Aurka	1.63179e-221	0.276758	0.334	0.136	3.26359e-218
Psat1	2.1328e-219	0.44182	0.484	0.284	4.26559e-216
Incenp	1.45785e-216	0.316244	0.389	0.22	2.9157e-213
Mcm3	7.65176e-215	0.319411	0.425	0.262	1.53035e-211
Dhfr	1.03763e-214	0.331657	0.406	0.233	2.07527e-211
B3galt2	1.41958e-212	0.30374	0.254	0.067	2.83915e-209
Hist1h4i	4.21123e-211	0.37375	0.4	0.224	8.42246e-208
Rad51ap1	7.69328e-207	0.229029	0.326	0.124	1.53866e-203
Gnai1	3.89401e-206	0.360735	0.399	0.215	7.78802e-203
Haus8	7.1409e-205	0.24952	0.387	0.224	1.42818e-201
Trib1	1.48119e-202	0.267133	0.434	0.262	2.96237e-199
Wfdc21	3.70914e-201	1.06912	0.381	0.204	7.41829e-198
Rpa2	6.74735e-198	0.294375	0.419	0.264	1.34947e-194
Atad2	1.49498e-197	0.306775	0.419	0.257	2.98995e-194
C330027C09Rik	9.51008e-196	0.200478	0.303	0.126	1.90202e-192
Mthfd2	2.70862e-195	0.431839	0.471	0.298	5.41724e-192
Pdk4	1.45649e-194	0.685206	0.383	0.227	2.91299e-191
Aurkb	1.68594e-192	0.307958	0.306	0.094	3.37187e-189
Coq8a	4.50077e-192	0.537474	0.391	0.257	9.00153e-189
Cenpe	1.10959e-188	0.339627	0.328	0.127	2.21918e-185
Hmgcs1	4.39816e-187	0.380623	0.579	0.4	8.79631e-184
Noct	7.42067e-177	0.351075	0.439	0.308	1.48413e-173
Grb14	9.0404e-177	0.372357	0.461	0.283	1.80808e-173
Clstn3	1.59427e-174	0.519843	0.392	0.239	3.18855e-171
Tuba1b	1.69353e-174	0.448705	0.74	0.563	3.38707e-171
Cib2	6.194e-171	0.500547	0.449	0.312	1.2388e-167
Tmem37	1.2392e-165	0.355314	0.422	0.256	2.47841e-162
Anln	3.94849e-165	0.256472	0.336	0.151	7.89698e-162
Dek	4.20633e-163	0.236962	0.651	0.433	8.41266e-160
Cdt1	7.61533e-158	0.259753	0.34	0.199	1.52307e-154
Tpx2	1.07531e-156	0.433074	0.363	0.162	2.15063e-153
Prc1	1.52607e-154	0.425372	0.33	0.136	3.05215e-151
Prim1	4.70602e-154	0.284435	0.374	0.246	9.41205e-151
Mcm2	5.98454e-154	0.303541	0.368	0.235	1.19691e-150
Adam12	2.5635e-147	0.271028	0.513	0.342	5.12701e-144
Thrsp	2.41888e-143	0.976056	0.519	0.399	4.83776e-140
Rfc5	1.59322e-139	0.310365	0.386	0.253	3.18644e-136
Racgap1	4.99962e-137	0.287118	0.343	0.191	9.99924e-134
Pck1	6.12531e-134	1.10852	0.454	0.339	1.22506e-130
Fen1	2.87419e-128	0.211768	0.305	0.189	5.74838e-125
Lmnb1	4.9334e-127	0.284465	0.411	0.276	9.86681e-124
Cfd	3.22167e-126	2.53964	0.412	0.301	6.44334e-123
Mxd3	1.0483e-125	0.213118	0.303	0.137	2.0966e-122
Tacc3	7.43011e-122	0.222487	0.34	0.205	1.48602e-118
Ckap2l	3.74733e-119	0.246922	0.304	0.162	7.49467e-116
Tcf19	3.69073e-117	0.265206	0.34	0.236	7.38146e-114
Plin2	7.19398e-114	0.317781	0.71	0.52	1.4388e-110
Ghr	8.67073e-97	0.328865	0.391	0.29	1.73415e-93
2022-09-06	1.85207e-96	0.204765	0.384	0.272	3.70414e-93
Ces1d	1.30936e-95	0.538058	0.484	0.397	2.61873e-92
Syce2	4.47152e-93	0.255318	0.355	0.254	8.94303e-90
Slc5a3	4.40967e-92	0.312867	0.42	0.324	8.81934e-89
Hist1h1e	2.64013e-91	0.487421	0.427	0.362	5.28026e-88
Cenpk	3.00548e-90	0.211978	0.283	0.155	6.01096e-87
Tubb5	1.04631e-81	0.394782	0.611	0.519	2.09263e-78
Clspn	1.87767e-78	0.220877	0.278	0.171	3.75534e-75
Apoc1	1.05991e-76	0.984525	0.422	0.341	2.11983e-73
Aspm	1.75185e-76	0.258966	0.268	0.124	3.5037e-73
Npc2	1.89716e-76	0.209037	0.824	0.704	3.79431e-73
Fasn	3.6034e-76	1.1046	0.477	0.4	7.2068e-73
Itih4	3.26209e-73	0.220673	0.218	0.119	6.52418e-70
Slc27a1	1.06919e-70	0.59577	0.338	0.261	2.13838e-67
Plin5	3.43652e-69	0.318015	0.311	0.207	6.87304e-66
Lockd	6.24841e-69	0.263648	0.294	0.173	1.24968e-65
Acp5	6.97341e-65	0.423129	0.366	0.29	1.39468e-61
Ncapg2	3.73799e-63	0.220069	0.317	0.239	7.47598e-60
Cox8b	2.01583e-62	0.741981	0.38	0.314	4.03166e-59
Gm4951	7.60565e-58	0.211864	0.371	0.288	1.52113e-54
mt-Atp6	1.35548e-54	0.224475	0.435	0.365	2.71096e-51
Slc25a1	1.23403e-44	0.342868	0.356	0.312	2.46807e-41
Cdo1	4.68952e-43	0.732388	0.346	0.315	9.37903e-40
Gk	5.48353e-43	0.509545	0.339	0.291	1.09671e-39
Trf	2.49563e-41	0.288883	0.382	0.33	4.99127e-38
mt-Co1	9.96957e-39	1.54687	0.462	0.437	1.99391e-35
Elovl6	6.80521e-38	0.347309	0.375	0.35	1.36104e-34
Acly	1.26278e-33	0.212042	0.445	0.384	2.52556e-30
Cenpq	6.17178e-31	0.205213	0.298	0.252	1.23436e-27
Ifi27l2a	1.13468e-28	0.872778	0.623	0.639	2.26937e-25
Ltc4s	1.95136e-25	0.353402	0.279	0.225	3.90271e-22
Orm1	8.9457e-15	0.41099	0.269	0.251	1.78914e-11
mt-Co2	1.7078e-11	0.236741	0.353	0.32	3.41561e-08
Lypd1	8.34108e-11	0.209356	0.328	0.304	1.66822e-07
Fabp3	2.98398e-09	0.37716	0.289	0.386	5.96797e-06
Lrg1	7.59056e-09	0.602	0.296	0.293	1.51811e-05
Ucp1	2.75947e-07	1.39698	0.335	0.379	0.000551894
Acaa1b	4.93213e-07	0.409382	0.234	0.285	0.000986426
Gmpr	5.67297e-06	0.242528	0.216	0.292	0.0113459
Acaca	6.53334e-05	0.338499	0.312	0.343	0.130667
Lcn2	0.00010937	0.510736	0.273	0.262	0.218739
Cidea	0.00216735	0.740788	0.339	0.423	1
Elovl3	0.114638	0.299981	0.229	0.286	1
Scd1	0.875016	2.08336	0.461	0.52	1

## Sheet: ASC3
	p_val	avg_logFC	pct.1	pct.2	p_val_adj
Inmt	0	2.11236	0.696	0.244	0
Gdf10	0	1.98478	0.671	0.202	0
Mgp	0	1.68759	0.68	0.327	0
Gas6	0	1.68546	0.77	0.327	0
Fbln1	0	1.60143	0.721	0.301	0
Cfh	0	1.57181	0.57	0.139	0
Mfap4	0	1.47587	0.576	0.201	0
Cilp	0	1.47244	0.61	0.145	0
Tgfbi	0	1.44262	0.634	0.278	0
F3	0	1.34028	0.732	0.442	0
C7	0	1.32541	0.571	0.158	0
Gsn	0	1.307	0.943	0.584	0
Cst3	0	1.29552	0.933	0.731	0
Gpx3	0	1.26901	0.844	0.615	0
Apod	0	1.11695	0.75	0.403	0
Abi3bp	0	1.10683	0.704	0.355	0
Nbl1	0	1.0408	0.702	0.377	0
Igf1	0	1.02568	0.793	0.51	0
Sfrp1	0	1.01509	0.694	0.32	0
Gas1	0	0.965566	0.716	0.397	0
Bgn	0	0.927255	0.866	0.591	0
Dcn	0	0.902097	0.941	0.609	0
Cd9	0	0.843716	0.789	0.436	0
Thbs4	0	0.833322	0.484	0.112	0
Hmcn2	0	0.833191	0.566	0.17	0
Clec3b	0	0.786233	0.919	0.591	0
Col1a1	0	0.780328	0.877	0.605	0
Col14a1	0	0.768262	0.722	0.364	0
Igfbp6	0	0.725732	0.858	0.501	0
Ctgf	0	0.51681	0.523	0.16	0
Cpxm2	0	0.507389	0.601	0.157	0
Fhl2	0	0.420801	0.54	0.166	0
Dkk2	0	0.309036	0.496	0.143	0
Podn	2.52491e-307	0.846099	0.619	0.269	5.04982e-304
C4b	4.81616e-281	1.0328	0.619	0.296	9.63233e-278
C1qtnf3	2.22426e-265	0.500936	0.46	0.102	4.44853e-262
Rbp1	1.64309e-256	1.24505	0.63	0.332	3.28619e-253
Mfap5	3.02558e-252	0.350302	0.873	0.556	6.05117e-249
Abca8a	1.52973e-251	0.757891	0.705	0.412	3.05946e-248
Eln	5.43235e-249	1.04596	0.607	0.309	1.08647e-245
Fxyd6	1.01734e-248	0.54074	0.52	0.188	2.03468e-245
Ecm1	5.02622e-238	1.00575	0.688	0.444	1.00524e-234
Srpx	1.5078e-236	0.761116	0.73	0.48	3.0156e-233
Clec11a	1.13769e-234	1.47433	0.553	0.206	2.27538e-231
Gadd45g	1.75903e-234	0.95365	0.801	0.611	3.51806e-231
Scn7a	3.43924e-218	0.521956	0.627	0.32	6.87848e-215
Pdgfrl	1.18814e-211	0.938112	0.505	0.176	2.37628e-208
Nmb	2.35296e-208	0.616353	0.586	0.304	4.70591e-205
Gpc3	2.09721e-205	0.728079	0.616	0.333	4.19441e-202
Cryab	1.63324e-195	0.485604	0.645	0.358	3.26647e-192
Olfml3	2.46517e-190	0.915412	0.612	0.342	4.93033e-187
Smoc2	2.28591e-183	0.289263	0.691	0.406	4.57182e-180
C2	1.63702e-179	1.13342	0.534	0.229	3.27404e-176
Gem	1.33789e-172	0.490798	0.642	0.384	2.67578e-169
Phlda1	3.99829e-170	0.489134	0.77	0.527	7.99658e-167
Pcolce2	6.30332e-164	0.632242	0.666	0.386	1.26066e-160
Tppp3	1.90099e-163	0.386956	0.777	0.516	3.80198e-160
Scara5	7.19707e-163	0.675433	0.64	0.377	1.43941e-159
Scg3	1.71155e-141	0.27815	0.457	0.17	3.42309e-138
Cp	1.2103e-139	0.725906	0.641	0.403	2.4206e-136
Adh1	2.32291e-136	0.416396	0.521	0.251	4.64582e-133
Abca8b	1.57178e-132	0.397099	0.501	0.235	3.14355e-129
Penk	1.55186e-130	1.46738	0.494	0.161	3.10371e-127
S100a10	2.91198e-129	0.382906	0.852	0.716	5.82397e-126
Hsd11b1	3.70479e-128	0.3473	0.559	0.296	7.40959e-125
Wfdc1	5.88528e-128	0.302321	0.438	0.134	1.17706e-124
Vtn	8.66806e-127	0.300758	0.5	0.227	1.73361e-123
Lum	8.67932e-126	0.345693	0.793	0.562	1.73586e-122
Adm	7.44038e-118	0.665248	0.516	0.275	1.48808e-114
Sned1	3.18363e-114	0.361204	0.561	0.311	6.36727e-111
Crispld2	2.23281e-110	0.294116	0.552	0.289	4.46561e-107
Cldn22	1.15726e-105	0.352906	0.202	0.024	2.31452e-102
Sfrp4	5.16331e-104	1.75258	0.491	0.219	1.03266e-100
Osr1	4.90155e-101	1.13183	0.493	0.205	9.8031e-98
Pmp22	3.22674e-99	0.252338	0.701	0.537	6.45348e-96
Myoc	2.51459e-98	0.839452	0.415	0.184	5.02919e-95
Id2	6.32806e-98	0.443226	0.665	0.472	1.26561e-94
Omd	8.52255e-91	0.368493	0.397	0.126	1.70451e-87
Fmo2	1.89463e-90	1.23899	0.466	0.153	3.78927e-87
Ace	3.25433e-87	0.477637	0.594	0.369	6.50865e-84
Anxa2	3.50006e-85	0.261993	0.849	0.664	7.00012e-82
Sfrp2	2.32828e-82	1.45723	0.568	0.378	4.65657e-79
Bmp5	1.19962e-81	0.203809	0.471	0.213	2.39925e-78
Cebpd	3.716e-78	0.42259	0.719	0.56	7.43201e-75
Fbln5	6.16836e-75	0.251951	0.611	0.396	1.23367e-71
Ifi205	9.72713e-73	0.224017	0.588	0.352	1.94543e-69
Angptl1	1.00366e-72	0.563647	0.533	0.316	2.00733e-69
Prnp	5.11243e-71	0.401357	0.57	0.393	1.02249e-67
Wisp2	1.97211e-68	0.64372	0.402	0.095	3.94423e-65
Acp5	6.61148e-68	0.218818	0.299	0.295	1.3223e-64
Sult1e1	7.58366e-68	0.316712	0.362	0.103	1.51673e-64
Chrdl1	1.07574e-67	1.26457	0.446	0.108	2.15148e-64
Rspo1	1.5906e-65	0.416126	0.383	0.094	3.18119e-62
Igfbp3	1.08315e-63	1.08787	0.458	0.224	2.1663e-60
Fn1	1.123e-63	0.284872	0.695	0.513	2.24599e-60
Cxcl12	1.12438e-58	0.38187	0.688	0.557	2.24875e-55
Lox	2.55602e-56	0.460284	0.511	0.314	5.11204e-53
Tmem100	3.72006e-56	0.276513	0.509	0.292	7.44012e-53
Hsp90b1	6.60515e-56	0.28639	0.819	0.716	1.32103e-52
Cadm3	8.09045e-55	0.301696	0.493	0.268	1.61809e-51
Fndc1	1.33026e-53	0.376537	0.575	0.376	2.66052e-50
Prg4	5.0912e-53	0.403307	0.271	0.195	1.01824e-49
Pcsk5	6.81125e-51	0.419759	0.447	0.235	1.36225e-47
Il6	1.1206e-46	0.362086	0.483	0.297	2.24119e-43
Lsamp	8.05423e-45	0.267236	0.433	0.174	1.61085e-41
Ccdc3	8.17492e-45	0.244315	0.263	0.17	1.63498e-41
Alkal2	1.34699e-44	0.279714	0.423	0.194	2.69399e-41
Agt	7.18615e-44	0.435151	0.394	0.152	1.43723e-40
Slc11a1	1.57143e-43	0.20396	0.27	0.145	3.14287e-40
Itm2a	3.25968e-43	0.35932	0.552	0.377	6.51935e-40
Myc	3.57823e-43	0.246998	0.51	0.319	7.15646e-40
Itgbl1	9.68574e-41	1.02574	0.412	0.11	1.93715e-37
Gm2a	2.70745e-34	0.321594	0.459	0.275	5.4149e-31
Ghr	5.09565e-32	0.307361	0.33	0.294	1.01913e-28
Serpina3n	1.02672e-29	0.323271	0.328	0.258	2.05344e-26
Mmp3	1.34026e-29	1.30286	0.453	0.247	2.68052e-26
Cldn10	1.83146e-28	0.377369	0.275	0.116	3.66293e-25
Vit	2.63302e-28	1.05863	0.412	0.118	5.26603e-25
Icam1	3.95367e-26	0.276336	0.517	0.357	7.90734e-23
Cxcl13	4.25e-25	1.26544	0.485	0.33	8.50001e-22
Ltbp4	3.71225e-23	0.485288	0.51	0.353	7.42451e-20
Csrp2	4.66745e-22	0.304142	0.594	0.484	9.3349e-19
Lrrc17	1.58771e-19	0.28797	0.523	0.352	3.17542e-16
Matn2	3.36623e-17	0.218344	0.339	0.242	6.73246e-14
Fibin	1.57611e-16	0.219327	0.368	0.175	3.15222e-13
Col4a4	4.09953e-15	0.436838	0.395	0.196	8.19907e-12
Ctsk	2.18465e-14	0.42077	0.556	0.444	4.36929e-11
Ndrg2	1.84417e-13	0.2395	0.389	0.337	3.68834e-10
Errfi1	1.7438e-12	0.280885	0.563	0.447	3.48759e-09
Cpe	2.10206e-10	0.678213	0.333	0.178	4.20413e-07
Ppm1n	2.96114e-09	0.237657	0.308	0.204	5.92228e-06
Ramp1	1.83453e-08	0.386191	0.328	0.196	3.66905e-05
Sult5a1	2.17897e-08	0.315892	0.468	0.317	4.35794e-05
Fgl2	1.10603e-07	0.472993	0.429	0.257	0.000221207
Paqr6	8.21856e-07	0.324186	0.288	0.056	0.00164371
Cpz	8.2933e-07	0.476888	0.301	0.152	0.00165866
Ildr2	1.83288e-06	0.207372	0.334	0.184	0.00366576
Klf5	1.02655e-05	0.536829	0.319	0.106	0.0205309
Ifitm1	1.36312e-05	0.33437	0.337	0.148	0.0272625
Tmem119	0.000211719	0.33341	0.433	0.282	0.423438
Cd44	0.00417601	0.214596	0.424	0.302	1
Rbp4	0.00463294	0.422489	0.443	0.386	1
Hspb2	0.0184524	0.269233	0.335	0.141	1
Cxcl16	0.0258348	0.229697	0.419	0.325	1
Gnai1	0.0316128	0.207249	0.347	0.218	1
Pdlim4	0.0672722	0.218751	0.44	0.336	1
Nr2f2	0.0720992	0.628639	0.381	0.236	1
Gpnmb	0.0901775	0.716678	0.367	0.173	1
Clu	0.111355	0.263222	0.348	0.21	1
Arl4a	0.347764	0.273835	0.458	0.399	1
AC130815.2	0.378256	0.274684	0.308	0.145	1
Arhgdib	0.740589	0.44315	0.379	0.208	1
Ccl8	0.948796	0.405506	0.368	0.239	1

## Sheet: ASC2
	p_val	avg_logFC	pct.1	pct.2	p_val_adj
Pi16	0	3.34514	0.843	0.363	0
Sbsn	0	2.35054	0.74	0.271	0
Igfbp6	0	2.21424	0.963	0.417	0
Fn1	0	2.03875	0.954	0.418	0
Mfap5	0	1.83975	0.938	0.489	0
Pcolce2	0	1.75313	0.803	0.306	0
Dmkn	0	1.7443	0.512	0.181	0
Sema3c	0	1.71829	0.734	0.2	0
Fbn1	0	1.71688	0.91	0.507	0
Cd248	0	1.70728	0.874	0.399	0
Ugdh	0	1.6371	0.768	0.355	0
Cd55	0	1.6111	0.716	0.29	0
Pcsk6	0	1.58022	0.716	0.239	0
Anxa3	0	1.55013	0.824	0.379	0
Ackr3	0	1.5444	0.747	0.282	0
Clec3b	0	1.51208	0.948	0.532	0
Col14a1	0	1.50123	0.825	0.28	0
Pla1a	0	1.49551	0.756	0.375	0
Procr	0	1.48296	0.709	0.322	0
Fndc1	0	1.45842	0.784	0.291	0
Emilin2	0	1.41598	0.742	0.319	0
Dpp4	0	1.3924	0.631	0.182	0
Sfrp2	0	1.34221	0.749	0.302	0
Krtdap	0	1.33773	0.434	0.119	0
Creb5	0	1.32997	0.662	0.23	0
Anxa1	0	1.28965	0.863	0.499	0
Gfpt2	0	1.27605	0.638	0.288	0
Has1	0	1.24942	0.52	0.212	0
Lrrn4cl	0	1.21308	0.65	0.243	0
Igfbp5	0	1.21126	0.749	0.424	0
Scara5	0	1.18554	0.71	0.317	0
Il1r2	0	1.18416	0.441	0.158	0
Ace	0	1.15809	0.681	0.311	0
Mt2	0	1.1536	0.778	0.491	0
Cadm3	0	1.13569	0.58	0.21	0
Efhd1	0	1.1198	0.542	0.157	0
Tmem100	0	1.08535	0.594	0.235	0
Cxcl13	0	1.07865	0.501	0.301	0
Ptgs2	0	1.04791	0.487	0.19	0
Opcml	0	1.0398	0.484	0.125	0
S100a10	0	1.0291	0.9	0.682	0
Ecm1	0	1.02064	0.707	0.401	0
Tppp3	0	0.991721	0.833	0.459	0
Tnfaip6	0	0.967999	0.669	0.473	0
Col1a1	0	0.951724	0.915	0.552	0
Aldh1a3	0	0.920909	0.427	0.075	0
Ppp1r14b	0	0.907683	0.764	0.486	0
Stmn4	0	0.904088	0.429	0.121	0
Gas7	0	0.897518	0.547	0.223	0
Basp1	0	0.885228	0.639	0.336	0
Smpd3	0	0.875141	0.413	0.121	0
Nbl1	0	0.845689	0.684	0.329	0
Flrt2	0	0.837223	0.476	0.185	0
Vegfd	0	0.824439	0.531	0.283	0
Ifi27l2a	0	0.816533	0.829	0.589	0
Ptgis	0	0.810487	0.505	0.243	0
Errfi1	0	0.808937	0.653	0.406	0
Lbp	0	0.797657	0.558	0.328	0
Pamr1	0	0.795133	0.405	0.112	0
Lrrc17	0	0.760362	0.616	0.301	0
Cxcl1	0	0.741142	0.728	0.532	0
Nov	0	0.729739	0.441	0.106	0
Csrp2	0	0.718587	0.653	0.451	0
Plac8	0	0.71831	0.626	0.322	0
Uchl1	0	0.689432	0.429	0.127	0
Mt1	0	0.676454	0.763	0.576	0
Lsp1	0	0.652616	0.614	0.328	0
Meg3	0	0.640584	0.735	0.497	0
Anxa2	0	0.600114	0.798	0.648	0
Mustn1	0	0.579629	0.5	0.232	0
Crip1	0	0.466363	0.823	0.628	0
Gpx3	0	0.458117	0.801	0.589	0
Lrrc15	0	0.240794	0.229	0.067	0
Dcn	0	0.211395	0.9	0.567	0
Abi3bp	2.88932e-301	0.416642	0.567	0.334	5.77864e-298
Ackr1	1.88137e-298	0.402734	0.385	0.14	3.76275e-295
Cthrc1	1.59177e-293	1.12149	0.51	0.305	3.18353e-290
Has2	7.31966e-291	0.308022	0.378	0.148	1.46393e-287
Bmp3	1.56118e-287	0.37877	0.319	0.023	3.12235e-284
Itgb7	3.16796e-273	0.434087	0.347	0.087	6.33591e-270
Akr1c18	4.26238e-271	0.636314	0.318	0.036	8.52475e-268
Car8	8.11673e-267	0.860749	0.394	0.119	1.62335e-263
Tmem158	8.12944e-263	0.663248	0.422	0.208	1.62589e-259
Atf3	4.77566e-241	0.362283	0.65	0.49	9.55131e-238
Plagl1	1.79151e-235	0.386361	0.422	0.221	3.58302e-232
Ildr2	5.62469e-234	0.633015	0.386	0.146	1.12494e-230
Ptx3	4.71098e-229	0.784312	0.492	0.316	9.42195e-226
Gpc3	1.4213e-226	0.533952	0.503	0.316	2.8426e-223
Hsp90b1	1.50377e-218	0.260586	0.851	0.691	3.00754e-215
Ccl7	4.02919e-218	0.316804	0.594	0.415	8.05839e-215
Ifi205	2.34568e-214	0.444868	0.515	0.333	4.69135e-211
Spon2	7.78522e-214	0.238685	0.422	0.226	1.55704e-210
Il33	1.27849e-211	0.747368	0.439	0.22	2.55697e-208
Prkg2	2.54911e-210	0.612317	0.349	0.1	5.09822e-207
Ptn	1.16832e-199	0.222828	0.313	0.148	2.33663e-196
Ckb	2.38619e-196	0.251561	0.578	0.418	4.77237e-193
Pcsk5	9.15068e-196	0.367141	0.4	0.214	1.83014e-192
Tubb6	1.03383e-195	0.421106	0.529	0.363	2.06767e-192
Fkbp11	1.42034e-186	0.373643	0.537	0.364	2.84068e-183
Cebpd	3.50742e-172	0.37971	0.68	0.545	7.01484e-169
Wnt2	4.7193e-171	0.491763	0.357	0.109	9.43861e-168
Gem	8.3742e-168	0.35862	0.525	0.373	1.67484e-164
Thbs2	4.87059e-165	0.597098	0.47	0.288	9.74118e-162
Sema3b	3.00556e-160	0.417474	0.347	0.135	6.01112e-157
Osr1	1.56581e-142	0.500794	0.404	0.182	3.13161e-139
Lox	8.14487e-142	0.263516	0.463	0.295	1.62897e-138
Cxcl2	2.87773e-136	0.280722	0.373	0.206	5.75546e-133
Sfrp4	1.15325e-127	0.506254	0.411	0.196	2.30649e-124
Dact2	1.2317e-122	0.802403	0.356	0.137	2.46339e-119
Sult5a1	9.51066e-116	0.319721	0.448	0.298	1.90213e-112
Tubb2b	2.40993e-113	0.427008	0.391	0.222	4.81985e-110
Calr	5.52064e-106	0.205519	0.805	0.707	1.10413e-102
Zbp1	2.38889e-98	0.425535	0.437	0.287	4.77777e-95
Cpz	6.01927e-97	0.269262	0.311	0.125	1.20385e-93
Kdelr2	3.38888e-92	0.232465	0.577	0.444	6.77776e-89
Gm12840	6.45286e-89	0.284978	0.292	0.075	1.29057e-85
Dclk1	3.70534e-81	0.253215	0.497	0.347	7.41067e-78
H19	2.09864e-78	0.780028	0.354	0.184	4.19728e-75
Fbln1	1.26306e-77	0.363705	0.464	0.299	2.52612e-74
Rab7b	4.98558e-74	0.389398	0.355	0.184	9.97115e-71
Lgals1	9.23679e-59	0.256989	0.795	0.71	1.84736e-55
Limch1	4.78349e-46	0.526077	0.366	0.2	9.56698e-43
Mcub	1.15845e-42	0.419612	0.371	0.241	2.31689e-39
Gap43	5.29588e-36	0.359384	0.247	0.063	1.05918e-32
Sult1e1	2.57213e-35	0.346717	0.273	0.084	5.14426e-32
Ccl8	7.27601e-34	0.211354	0.356	0.222	1.4552e-30
Dkk2	4.65437e-32	0.203545	0.293	0.138	9.30873e-29
Rcan1	1.15921e-26	0.21398	0.347	0.26	2.31843e-23
Naaa	2.78474e-26	0.333799	0.407	0.322	5.56949e-23
Col12a1	3.87151e-17	0.548359	0.356	0.24	7.74302e-14
Il6	7.17111e-16	0.61591	0.38	0.293	1.43422e-12
Sdf2l1	1.53231e-13	0.214565	0.36	0.365	3.06462e-10
Ptgs1	1.78782e-08	0.465246	0.308	0.185	3.57565e-05
Osr2	0.000168211	0.379155	0.294	0.153	0.336423
C4b	0.0332568	0.352591	0.386	0.304	1
Prg4	0.281172	0.657209	0.306	0.174	1
Serpina3n	0.94176	0.239373	0.327	0.247	1

## Sheet: ASC1
	p_val	avg_logFC	pct.1	pct.2	p_val_adj
Cxcl14	0	2.14983	0.769	0.322	0
Smoc2	0	2.06321	0.697	0.323	0
Lum	0	1.7158	0.921	0.447	0
Ccl11	0	1.53675	0.891	0.459	0
Lpl	0	1.50168	0.932	0.612	0
Apoe	0	1.31846	0.736	0.518	0
Fbln7	0	1.22271	0.595	0.24	0
Tmem176b	0	1.21543	0.796	0.469	0
Gsn	0	1.18769	0.888	0.504	0
Enpp2	0	1.17762	0.746	0.323	0
Hsd11b1	0	1.17307	0.496	0.246	0
Cxcl9	0	1.16741	0.651	0.351	0
Dcn	0	1.13697	0.949	0.513	0
Cpxm1	0	1.13448	0.778	0.358	0
Tmem176a	0	1.08907	0.71	0.396	0
Apod	0	1.08103	0.639	0.349	0
Cp	0	1.06675	0.758	0.291	0
Bmper	0	1.06365	0.728	0.308	0
Cyp1b1	0	1.06098	0.732	0.262	0
Fst	0	1.02864	0.753	0.411	0
Crispld2	0	1.01352	0.485	0.241	0
Srpx	0	1.00233	0.808	0.379	0
Mafb	0	0.978705	0.683	0.349	0
Bgn	0	0.972693	0.904	0.498	0
Ccl2	0	0.954832	0.544	0.368	0
Abca8a	0	0.903572	0.697	0.333	0
Ccl7	0	0.89752	0.591	0.398	0
Vcam1	0	0.877552	0.661	0.306	0
Cxcl10	0	0.877353	0.528	0.322	0
Angptl1	0	0.870334	0.546	0.249	0
Meox1	0	0.860299	0.56	0.217	0
Timp1	0	0.84478	0.558	0.358	0
F3	0	0.837615	0.745	0.355	0
Gpm6b	0	0.808237	0.668	0.312	0
AW112010	0	0.767719	0.774	0.474	0
Npc2	0	0.76071	0.892	0.642	0
Ctsk	0	0.753496	0.684	0.362	0
Mdk	0	0.746511	0.491	0.225	0
Lypd1	0	0.710609	0.521	0.222	0
Sned1	0	0.67099	0.53	0.253	0
B2m	0	0.664172	0.943	0.801	0
Fgf10	0	0.634134	0.539	0.231	0
Igf1	0	0.630439	0.75	0.447	0
Thbs1	0	0.607773	0.463	0.275	0
Tmem119	0	0.60546	0.497	0.215	0
Cxcl16	0	0.575377	0.556	0.245	0
H2-K1	0	0.567636	0.888	0.716	0
Dclk1	0	0.565495	0.59	0.295	0
Col18a1	0	0.552344	0.605	0.336	0
Cxcl1	0	0.545716	0.708	0.519	0
Podn	0	0.545373	0.456	0.233	0
Spon1	0	0.537106	0.471	0.177	0
Lsamp	0	0.507005	0.389	0.118	0
Adam12	0	0.506938	0.533	0.283	0
Itm2a	0	0.498242	0.563	0.323	0
Gpx3	0	0.49535	0.85	0.548	0
Lgmn	0	0.480059	0.528	0.334	0
Lgals1	0	0.473385	0.894	0.663	0
Ctsc	0	0.470607	0.461	0.231	0
G0s2	0	0.465826	0.618	0.447	0
Calr	0	0.460419	0.878	0.669	0
Meg3	0	0.450392	0.738	0.471	0
Sc5d	0	0.443304	0.481	0.296	0
H2-Q7	0	0.438033	0.705	0.452	0
Rbp1	0	0.433819	0.553	0.277	0
Plin2	0	0.427345	0.677	0.477	0
Iigp1	0	0.399243	0.619	0.433	0
Col1a1	0	0.394057	0.908	0.516	0
Fscn1	0	0.393998	0.603	0.351	0
Scd2	0	0.382013	0.586	0.415	0
Hsp90b1	0	0.376847	0.867	0.668	0
Ubd	0	0.364873	0.318	0.118	0
Gm4951	0	0.359262	0.437	0.238	0
Ifi205	0	0.356347	0.558	0.297	0
Kdelr2	0	0.348887	0.617	0.414	0
Sdc1	0	0.345723	0.497	0.272	0
Aoc3	0	0.33732	0.552	0.291	0
Pdia4	0	0.335258	0.575	0.367	0
Blnk	0	0.320522	0.34	0.064	0
Hmgcs1	0	0.304637	0.522	0.369	0
Gas1	0	0.302162	0.628	0.341	0
Tnfaip6	0	0.295085	0.706	0.438	0
Mest	0	0.293607	0.447	0.237	0
Pdlim4	0	0.288822	0.542	0.267	0
Ifi203	0	0.267713	0.615	0.405	0
Sh3bgrl3	0	0.250554	0.825	0.605	0
Grb14	0	0.250269	0.457	0.232	0
Ccl19	0	0.246933	0.434	0.179	0
Acsl3	0	0.233543	0.481	0.318	0
Nnmt	0	0.222504	0.684	0.471	0
Scn7a	0	0.204304	0.508	0.28	0
S1pr3	0	0.20283	0.491	0.248	0
Manf	1.95362e-301	0.213717	0.74	0.519	3.90725e-298
Cebpd	1.77529e-299	0.354593	0.714	0.517	3.55057e-296
Nmb	2.86003e-299	0.553275	0.448	0.278	5.72006e-296
Hmox1	4.88576e-299	0.418243	0.482	0.306	9.77153e-296
Sqle	6.5956e-297	0.316411	0.431	0.278	1.31912e-293
Sult5a1	1.33188e-291	0.438322	0.481	0.269	2.66376e-288
Bmp5	9.59677e-284	0.412029	0.393	0.17	1.91935e-280
Hspa5	1.26735e-271	0.310638	0.845	0.685	2.5347e-268
Ddit3	1.2888e-261	0.259026	0.548	0.39	2.5776e-258
Srm	1.95053e-258	0.243784	0.575	0.395	3.90106e-255
Slc1a3	2.98307e-258	0.445494	0.433	0.215	5.96614e-255
H2-Q10	1.74602e-257	0.52623	0.436	0.266	3.49205e-254
Olfml3	1.33315e-236	0.396453	0.496	0.311	2.66629e-233
Sqstm1	7.25791e-228	0.230364	0.619	0.435	1.45158e-224
Serpine1	8.51453e-224	0.637336	0.458	0.276	1.70291e-220
Socs1	1.11872e-223	0.249655	0.482	0.314	2.23743e-220
Gadd45a	9.53011e-221	0.230444	0.465	0.311	1.90602e-217
Trf	2.87548e-219	0.541401	0.443	0.291	5.75097e-216
Vwa1	8.36944e-205	0.341366	0.419	0.249	1.67389e-201
Col6a6	2.32918e-201	0.318402	0.352	0.156	4.65837e-198
Tnc	3.63793e-199	0.255146	0.333	0.21	7.27586e-196
Mmp3	2.72824e-198	0.637334	0.398	0.21	5.45649e-195
Abca8b	6.00829e-198	0.279223	0.378	0.208	1.20166e-194
Oasl2	6.5317e-191	0.233208	0.447	0.288	1.30634e-187
Dnajb1	7.22728e-187	0.44317	0.603	0.466	1.44546e-183
Egr2	8.79648e-186	0.260426	0.453	0.321	1.7593e-182
Spry1	2.51055e-183	0.456744	0.389	0.207	5.0211e-180
Fdps	1.03816e-174	0.386805	0.459	0.339	2.07631e-171
Cmbl	4.00895e-163	0.307056	0.433	0.286	8.0179e-160
Icam1	2.02714e-161	0.220253	0.48	0.326	4.05428e-158
Mt1	2.78819e-161	0.365017	0.69	0.584	5.57639e-158
Ces1d	4.44083e-157	0.325742	0.479	0.373	8.88167e-154
Isg15	8.25078e-141	0.33379	0.652	0.533	1.65016e-137
Col4a4	2.82972e-138	0.351713	0.344	0.16	5.65943e-135
Pappa	8.38264e-138	0.343741	0.329	0.09	1.67653e-134
Fkbp11	1.24611e-134	0.34683	0.506	0.358	2.49222e-131
Ifit1	2.69861e-123	0.379484	0.462	0.325	5.39721e-120
Nrep	1.45174e-107	0.445485	0.464	0.345	2.90348e-104
Saa3	8.92567e-99	1.05488	0.388	0.297	1.78513e-95
Olfm2	8.24879e-94	0.254088	0.293	0.082	1.64976e-90
P2ry14	2.57798e-92	0.358156	0.339	0.171	5.15596e-89
Msc	4.2893e-84	0.380316	0.318	0.119	8.5786e-81
Lhx8	2.25891e-74	0.325645	0.313	0.128	4.51782e-71
C2	3.52748e-67	0.206342	0.363	0.209	7.05495e-64
Adamts4	7.98787e-66	0.238509	0.388	0.267	1.59757e-62
Gpnmb	2.35375e-65	0.273543	0.303	0.143	4.7075e-62
Lox	3.03556e-56	0.206954	0.413	0.296	6.07113e-53
Mmp11	3.0641e-52	0.24368	0.236	0.213	6.12819e-49
Peg3	5.28551e-39	0.361872	0.329	0.212	1.0571e-35
Il34	1.79728e-38	0.215167	0.325	0.191	3.59455e-35
Serpina3n	1.53071e-34	0.239338	0.345	0.231	3.06141e-31
Ifit3	1.53752e-27	0.429094	0.391	0.301	3.07504e-24
Adh1	1.89081e-17	0.380611	0.346	0.242	3.78162e-14
Fibin	3.30837e-17	0.227818	0.257	0.163	6.61675e-14
Hpgd	3.99997e-16	0.372889	0.284	0.137	7.99994e-13
Retsat	2.88236e-11	0.257083	0.341	0.267	5.76471e-08
Ccl8	4.12544e-10	0.37274	0.315	0.223	8.25088e-07
Sox11	6.20049e-09	0.235654	0.268	0.159	1.2401e-05
Alkal2	1.36846e-07	0.206922	0.294	0.18	0.000273692
Plac8	0.742003	0.224799	0.416	0.372	1
