# Supplementary material for: Deconstructing cold-induced brown adipocyte neogenesis in mice
Source: eLife. 2022 Jul 18;11:e80167. doi: 10.7554/eLife.80167 (PMC9348851; doi:10.7554/eLife.80167)
Supplement: Supplementary file 6. [file elife-80167-supp6.xlsx]

## Sheet: INFORMATION
Supplementary File 6. DEGs for each cluster in the reclustered CONTROL, COLD, and CL ASC iBAT data.
Related to Supplementary Figure 4D-E.
List of DEGs define by Seurat by graph-based clustering. Each cluster is a new tab.
iBAT, ASCs only, CONTROL, COLD, and CL libraries.
Differentially expressed genes that define each cluster were identified using a Wilcoxon Rank Sum test in Seurat with the following parameters: min.pct = 0.20, logfc.threshold = 0.2, only.pos = TRUE.

## Sheet: ASC1_coldactivated
	p_val	avg_logFC	pct.1	pct.2	p_val_adj
Cxcl9	0	1.39482	0.555	0.158	0
Tmem176a	0	1.20596	0.698	0.237	0
Tmem176b	0	1.17355	0.779	0.313	0
Cxcl10	0	1.08711	0.352	0.118	0
Lpl	0	1.00106	0.882	0.556	0
H2-K1	0	0.922841	0.816	0.603	0
AW112010	0	0.905589	0.658	0.395	0
Isg15	0	0.866926	0.531	0.31	0
Ifit3	0	0.845666	0.326	0.134	0
Col4a1	0	0.843776	0.895	0.492	0
B2m	0	0.840695	0.914	0.765	0
H2-Q7	0	0.824635	0.55	0.226	0
Timp1	0	0.820389	0.537	0.292	0
Ly6e	0	0.812853	0.777	0.594	0
Iigp1	0	0.799042	0.527	0.268	0
Cpxm1	0	0.79294	0.698	0.429	0
Enpp2	0	0.788683	0.693	0.358	0
Col6a3	0	0.786189	0.891	0.627	0
Ifit1	0	0.777284	0.349	0.145	0
Col4a2	0	0.775064	0.846	0.457	0
Lypd1	0	0.757094	0.354	0.094	0
Lgals3bp	0	0.754301	0.763	0.505	0
Cyp1b1	0	0.716663	0.619	0.272	0
Col6a1	0	0.699591	0.911	0.704	0
H2-D1	0	0.697103	0.872	0.715	0
Col15a1	0	0.6949	0.83	0.429	0
Npc2	0	0.686679	0.821	0.713	0
Sparcl1	0	0.685539	0.807	0.375	0
Bst2	0	0.670554	0.699	0.554	0
Bmper	0	0.660832	0.581	0.273	0
Sned1	0	0.652561	0.438	0.18	0
Col18a1	0	0.645924	0.477	0.206	0
Col6a2	0	0.645919	0.873	0.643	0
Bgn	0	0.632887	0.865	0.541	0
Lum	0	0.628468	0.868	0.588	0
Vcam1	0	0.613855	0.501	0.233	0
Fst	0	0.597186	0.705	0.511	0
Slfn5	0	0.587855	0.752	0.487	0
Cd63	0	0.587079	0.918	0.753	0
Ifi203	0	0.577698	0.532	0.296	0
Fgf10	0	0.573063	0.364	0.133	0
Fbln7	0	0.572605	0.484	0.211	0
Plin2	0	0.567339	0.645	0.389	0
Adam12	0	0.563088	0.393	0.154	0
Thbs1	0	0.555265	0.279	0.109	0
H2-T22	0	0.553145	0.642	0.424	0
Ctsc	0	0.550539	0.353	0.117	0
Ctsh	0	0.540605	0.799	0.611	0
Apoe	0	0.539592	0.648	0.339	0
Lgmn	0	0.53511	0.503	0.29	0
Postn	0	0.531202	0.618	0.346	0
Irf7	0	0.528555	0.465	0.253	0
Angptl4	0	0.525971	0.647	0.43	0
Sh3bgrl3	0	0.502042	0.707	0.507	0
Pcolce	0	0.489108	0.896	0.77	0
Mndal	0	0.47569	0.505	0.29	0
Srpx	0	0.475413	0.731	0.541	0
Adam23	0	0.467896	0.399	0.185	0
Rarres2	0	0.463763	0.888	0.744	0
Serpinh1	0	0.462707	0.935	0.825	0
Gpm6b	0	0.450068	0.554	0.296	0
Aoc3	0	0.445941	0.41	0.21	0
Cp	0	0.441008	0.684	0.416	0
Eva1b	0	0.433898	0.661	0.439	0
Ifitm3	0	0.430482	0.878	0.759	0
H2-Q6	0	0.427841	0.288	0.106	0
Col5a2	0	0.424119	0.848	0.669	0
Tmem119	0	0.421593	0.375	0.18	0
Plpp1	0	0.419222	0.484	0.272	0
Igfbp7	0	0.412669	0.913	0.626	0
Cxcl16	0	0.412562	0.366	0.152	0
Slc9a3r2	0	0.409395	0.348	0.151	0
Scarb2	0	0.405325	0.518	0.302	0
Emilin1	0	0.398341	0.39	0.191	0
Fscn1	0	0.393025	0.483	0.272	0
Cygb	0	0.233144	0.757	0.494	0
P2rx4	1.45881e-306	0.447147	0.451	0.248	2.7169e-302
Mmp14	1.00725e-303	0.462827	0.74	0.564	1.8759e-299
Rtp4	1.35201e-303	0.427427	0.465	0.255	2.51798e-299
Hist1h2bc	3.02863e-300	0.455196	0.599	0.387	5.64052e-296
Plod1	7.76024e-299	0.405727	0.492	0.284	1.44527e-294
Icam1	4.88752e-291	0.443462	0.377	0.184	9.10251e-287
Ccl11	1.8824e-290	0.259	0.847	0.639	3.50578e-286
Grn	4.56454e-283	0.445798	0.742	0.593	8.50099e-279
Col5a3	1.78464e-281	0.349625	0.722	0.494	3.32371e-277
Palld	6.55481e-280	0.399391	0.318	0.145	1.22077e-275
Trabd2b	1.40127e-276	0.376374	0.218	0.078	2.60973e-272
Steap4	2.61309e-276	0.364327	0.617	0.39	4.86662e-272
Oasl2	1.74361e-272	0.375717	0.371	0.185	3.2473e-268
Enpep	4.77126e-270	0.397138	0.328	0.156	8.886e-266
Mme	5.59407e-270	0.408106	0.373	0.193	1.04184e-265
Itm2b	5.90299e-269	0.327963	0.932	0.823	1.09937e-264
Retsat	8.01482e-266	0.360561	0.308	0.143	1.49268e-261
Mdk	2.34024e-264	0.391029	0.355	0.175	4.35846e-260
Sdc1	3.53468e-264	0.371227	0.249	0.102	6.58298e-260
Col5a1	7.94378e-264	0.398628	0.78	0.616	1.47945e-259
Peg3	6.91505e-263	0.405428	0.264	0.11	1.28786e-258
Ccnd2	4.42445e-258	0.48395	0.608	0.429	8.24009e-254
Gm4951	1.20779e-252	0.385352	0.285	0.128	2.24939e-248
Btg1	2.60935e-247	0.418124	0.557	0.368	4.85965e-243
Creg1	1.35845e-245	0.4321	0.631	0.47	2.52997e-241
Angptl2	1.23221e-243	0.417311	0.59	0.414	2.29486e-239
Xaf1	2.44299e-240	0.346957	0.377	0.201	4.54982e-236
Casp4	2.26638e-235	0.354585	0.325	0.162	4.22091e-231
Col3a1	4.6092e-235	0.249819	0.941	0.771	8.58418e-231
Hspg2	1.17103e-232	0.333953	0.718	0.529	2.18093e-228
Mafb	2.65658e-230	0.399856	0.442	0.26	4.94762e-226
Cmbl	2.91021e-226	0.396292	0.324	0.167	5.41998e-222
Marcksl1	4.50519e-225	0.300953	0.208	0.081	8.39047e-221
Rab13	2.77844e-220	0.33864	0.396	0.227	5.17457e-216
S1pr3	1.42777e-219	0.314422	0.205	0.08	2.65907e-215
Rcn3	9.65754e-216	0.327271	0.815	0.689	1.79862e-211
Cald1	2.51383e-215	0.428199	0.778	0.648	4.68175e-211
Cstb	1.01445e-214	0.444218	0.705	0.579	1.88931e-210
Lmo4	2.57446e-211	0.330923	0.454	0.28	4.79467e-207
Hmox1	1.40249e-208	0.389829	0.315	0.163	2.61199e-204
Ifi47	1.57676e-208	0.319869	0.201	0.079	2.93655e-204
Adamts12	1.6554e-208	0.373033	0.343	0.187	3.08301e-204
Fdxr	7.3404e-206	0.294661	0.212	0.088	1.36708e-201
Hexa	4.40731e-205	0.349887	0.706	0.559	8.20818e-201
Rnf213	1.55746e-198	0.34115	0.316	0.168	2.90062e-194
Phf11d	8.34245e-198	0.309549	0.27	0.13	1.5537e-193
Sox4	8.16548e-192	0.403967	0.384	0.229	1.52074e-187
Il1r1	2.22852e-191	0.341489	0.425	0.262	4.1504e-187
Arpc1b	3.32546e-190	0.31105	0.832	0.721	6.19334e-186
Rrbp1	9.23889e-190	0.3048	0.844	0.728	1.72065e-185
Limd2	1.39434e-189	0.294439	0.273	0.136	2.59681e-185
2022-09-11	7.9052e-189	0.324478	0.423	0.26	1.47226e-184
Gpx7	2.64364e-188	0.319634	0.681	0.525	4.92352e-184
Mgst1	1.75849e-186	0.235683	0.865	0.782	3.27501e-182
Meox1	4.92981e-185	0.261981	0.304	0.154	9.18128e-181
Egr2	1.97427e-184	0.317089	0.215	0.096	3.67687e-180
Slc1a3	1.09269e-181	0.328306	0.285	0.15	2.03502e-177
Stat1	1.19861e-180	0.333582	0.345	0.198	2.23229e-176
Pdgfra	1.49589e-179	0.311955	0.671	0.513	2.78594e-175
Mrc2	1.51483e-179	0.345454	0.446	0.284	2.82122e-175
Igf1	6.14209e-178	0.404619	0.585	0.432	1.1439e-173
H2-Q4	8.44457e-177	0.308235	0.342	0.195	1.57272e-172
C1qtnf6	3.15938e-173	0.293899	0.48	0.315	5.88403e-169
Jun	7.6247e-172	0.279923	0.785	0.635	1.42002e-167
H2-T23	4.45813e-170	0.373441	0.534	0.381	8.30282e-166
Snhg18	6.43649e-168	0.322005	0.577	0.43	1.19873e-163
Ppib	9.80446e-168	0.264926	0.872	0.822	1.82598e-163
Nr1h3	8.31062e-166	0.274623	0.33	0.19	1.54777e-161
Psmb8	1.29419e-165	0.337683	0.616	0.467	2.4103e-161
Sp100	3.29168e-164	0.276723	0.378	0.228	6.13042e-160
Nid2	4.08549e-164	0.316555	0.384	0.235	7.60882e-160
Cxcl12	1.44252e-163	0.329144	0.55	0.388	2.68655e-159
Aprt	1.73222e-163	0.295166	0.549	0.387	3.22609e-159
Ndufa4l2	1.11037e-162	0.21405	0.383	0.223	2.06795e-158
Ggt5	1.92211e-161	0.295419	0.291	0.156	3.57973e-157
Pnrc1	2.75002e-161	0.319448	0.654	0.509	5.12163e-157
Serf2	9.68823e-160	0.282924	0.88	0.822	1.80434e-155
2022-09-04	6.42292e-159	0.244374	0.234	0.115	1.1962e-154
Irgm1	5.42835e-158	0.305134	0.296	0.163	1.01098e-153
Pdgfrb	6.15159e-158	0.291469	0.407	0.253	1.14567e-153
Tmem167	1.58656e-155	0.274017	0.698	0.571	2.95481e-151
Igsf10	1.39071e-154	0.273487	0.35	0.206	2.59007e-150
Dnajb1	6.92025e-153	0.446469	0.469	0.331	1.28883e-148
Uhrf2	2.94236e-152	0.3401	0.361	0.224	5.47985e-148
Gbp3	3.08147e-151	0.255824	0.285	0.156	5.73893e-147
Aspn	1.91306e-150	0.255808	0.681	0.519	3.56289e-146
Mmp19	4.74978e-150	0.271917	0.304	0.173	8.84599e-146
Trafd1	4.51577e-149	0.265823	0.309	0.176	8.41016e-145
Gsto1	3.41755e-148	0.215272	0.314	0.178	6.36484e-144
Calr	4.74344e-148	0.316553	0.804	0.738	8.83418e-144
Rplp0	1.00137e-147	0.241971	0.895	0.847	1.86495e-143
Dclk1	1.2268e-147	0.305004	0.466	0.314	2.28479e-143
Ppic	1.4242e-147	0.244066	0.756	0.632	2.65243e-143
Cnpy2	9.98645e-147	0.277582	0.747	0.65	1.85988e-142
Ryk	7.54609e-145	0.274829	0.431	0.288	1.40538e-140
Pparg	1.05628e-143	0.248878	0.331	0.195	1.96722e-139
Gbp7	2.41685e-143	0.279864	0.257	0.139	4.50115e-139
P3h1	6.4999e-143	0.273114	0.37	0.234	1.21054e-138
Traf4	6.55961e-143	0.272287	0.261	0.144	1.22166e-138
Fxyd5	3.70496e-142	0.241871	0.437	0.282	6.90012e-138
Tnfrsf1a	1.89082e-140	0.286837	0.559	0.413	3.52146e-136
Pth1r	8.48717e-139	0.254162	0.219	0.112	1.58065e-134
Mfap2	1.63058e-138	0.311865	0.59	0.447	3.0368e-134
Fkbp10	3.36013e-138	0.258356	0.488	0.341	6.2579e-134
Tmem106a	5.16456e-134	0.25341	0.297	0.173	9.61848e-130
Thsd7a	2.76771e-133	0.264515	0.239	0.127	5.15459e-129
Ifitm2	1.14916e-132	0.234436	0.865	0.776	2.14019e-128
Acot7	3.4361e-132	0.218837	0.204	0.103	6.3994e-128
Psap	8.61467e-131	0.264761	0.842	0.749	1.6044e-126
Sgk1	2.39218e-130	0.276394	0.309	0.185	4.45519e-126
Lifr	1.51724e-128	0.267853	0.342	0.214	2.82572e-124
Ftl1	1.54938e-128	0.312726	0.899	0.824	2.88556e-124
Tap1	2.50401e-128	0.258657	0.264	0.151	4.66347e-124
Osmr	9.64022e-128	0.26101	0.291	0.172	1.7954e-123
Plvap	1.31608e-127	0.246848	0.209	0.107	2.45107e-123
Ctsz	6.25664e-126	0.24323	0.749	0.646	1.16524e-121
Dpep1	1.05243e-125	0.282873	0.814	0.719	1.96004e-121
Pld3	1.30292e-122	0.225598	0.317	0.194	2.42655e-118
Mmp2	1.36033e-122	0.232751	0.814	0.675	2.53349e-118
Cotl1	1.5221e-121	0.250808	0.413	0.277	2.83476e-117
Fkbp11	1.78852e-120	0.205457	0.468	0.324	3.33094e-116
Ccl2	8.15543e-120	0.837093	0.326	0.216	1.51887e-115
Ssr2	4.21023e-118	0.263203	0.719	0.613	7.84112e-114
P4hb	4.46239e-118	0.206133	0.746	0.638	8.31075e-114
Igtp	2.35497e-117	0.236002	0.21	0.111	4.3859e-113
Grina	4.78347e-117	0.247139	0.516	0.379	8.90874e-113
Ifi207	5.26242e-117	0.224522	0.506	0.36	9.80074e-113
Erp29	9.29439e-117	0.258866	0.691	0.568	1.73099e-112
Ifih1	1.01164e-116	0.272069	0.254	0.146	1.88408e-112
Maged1	1.92462e-114	0.256313	0.603	0.485	3.58442e-110
Chpf	1.6802e-113	0.236043	0.416	0.285	3.12921e-109
Gbp2	2.64991e-113	0.332566	0.307	0.191	4.9352e-109
Atp9a	3.63466e-113	0.214197	0.241	0.136	6.76919e-109
Ypel3	2.7298e-112	0.237471	0.664	0.533	5.08397e-108
Id2	8.11014e-111	0.236576	0.463	0.337	1.51043e-106
Ncor1	1.86719e-110	0.247511	0.609	0.49	3.47746e-106
Gusb	2.51353e-109	0.227637	0.379	0.255	4.6812e-105
Tor3a	3.10134e-109	0.221599	0.261	0.153	5.77593e-105
Psmb9	5.04639e-109	0.245627	0.407	0.278	9.39841e-105
Daxx	3.98392e-108	0.204156	0.217	0.121	7.41965e-104
Tcf7l2	3.51679e-107	0.252664	0.346	0.229	6.54967e-103
Pdia4	6.31279e-106	0.274217	0.479	0.354	1.17569e-101
Tceal9	1.30903e-104	0.210156	0.734	0.618	2.43794e-100
Socs1	8.53624e-104	0.257994	0.363	0.245	1.58979e-99
Mydgf	2.3937e-103	0.212707	0.618	0.493	4.45803e-99
C1qtnf12	3.17687e-103	0.224151	0.347	0.23	5.9166e-99
Tfpi	4.2781e-102	0.209305	0.341	0.225	7.96754e-98
Vasp	4.49554e-102	0.218123	0.322	0.21	8.37249e-98
Ccl7	5.06137e-102	0.681426	0.423	0.324	9.42629e-98
Nrep	1.32031e-100	0.338928	0.303	0.198	2.45895e-96
Mosmo	1.03686e-98	0.215967	0.232	0.137	1.93104e-94
Pdia3	1.90388e-98	0.230658	0.798	0.752	3.54579e-94
Ctsk	2.70665e-98	0.270388	0.579	0.459	5.04087e-94
Akr1b3	3.72945e-96	0.272838	0.607	0.502	6.94574e-92
2022-09-08	8.12996e-96	0.206051	0.428	0.305	1.51412e-91
Ppp3ca	3.23088e-95	0.236807	0.419	0.303	6.01719e-91
Gas1	4.57898e-94	0.216658	0.52	0.398	8.52788e-90
2810004N23Rik	4.72726e-94	0.201175	0.265	0.165	8.80405e-90
Calm3	1.87113e-93	0.201425	0.61	0.485	3.4848e-89
Tmed9	3.13511e-92	0.207808	0.753	0.666	5.83884e-88
Maged2	5.5236e-92	0.205879	0.498	0.375	1.02871e-87
Htra3	1.51166e-91	0.207297	0.819	0.707	2.81531e-87
Serpine1	3.49048e-90	0.207582	0.339	0.227	6.50067e-86
Pdia6	1.81699e-89	0.263939	0.722	0.655	3.38396e-85
Ctsb	5.24357e-88	0.207504	0.819	0.764	9.76563e-84
Eif1a	7.33113e-88	0.228499	0.37	0.262	1.36535e-83
Tapbp	1.67728e-86	0.216056	0.65	0.553	3.12377e-82
Ssr4	1.42022e-85	0.208252	0.742	0.676	2.64503e-81
Glmp	1.89585e-85	0.201441	0.455	0.34	3.53082e-81
Samd9l	3.81508e-85	0.209298	0.231	0.142	7.10521e-81
Ms4a4d	1.79791e-83	0.203205	0.553	0.43	3.34842e-79
Por	9.09502e-83	0.203301	0.441	0.329	1.69386e-78
Ifi204	1.15816e-82	0.207819	0.616	0.507	2.15696e-78
Ttc3	1.49189e-82	0.2073	0.458	0.35	2.77849e-78
Gaa	1.61545e-81	0.201315	0.47	0.357	3.00862e-77
Tmem140	3.92445e-79	0.211042	0.378	0.27	7.3089e-75
Nfkbiz	2.75408e-77	0.221241	0.448	0.343	5.1292e-73
Mxd4	8.0072e-77	0.206481	0.604	0.513	1.49126e-72
Pabpc1	2.74687e-76	0.213341	0.739	0.661	5.11577e-72
Zeb2	9.4487e-73	0.200386	0.559	0.457	1.75973e-68
Mast4	6.29863e-71	0.202866	0.267	0.179	1.17306e-66
Ccl8	7.94873e-70	0.37676	0.286	0.198	1.48037e-65
Zfand5	1.98647e-69	0.211402	0.515	0.412	3.69959e-65
Col27a1	2.01919e-68	0.228503	0.232	0.152	3.76053e-64
Gm42418	1.68772e-66	0.264289	0.531	0.457	3.1432e-62
Adam19	1.21523e-64	0.220257	0.271	0.189	2.26324e-60
Mmp3	1.52524e-64	0.207384	0.296	0.208	2.84061e-60
Edf1	4.63727e-62	0.226764	0.708	0.652	8.63646e-58
Txnip	7.3062e-60	0.248062	0.566	0.472	1.36071e-55
Ppp1r2	3.81123e-56	0.230436	0.527	0.446	7.09803e-52
Sqstm1	8.40431e-56	0.21774	0.557	0.477	1.56522e-51
Phlda1	8.20092e-41	0.228923	0.554	0.481	1.52734e-36
Ddit3	6.29119e-39	0.201086	0.314	0.245	1.17167e-34
Hspa5	3.1975e-32	0.230938	0.732	0.709	5.95503e-28
Plac8	6.58432e-15	0.37642	0.325	0.29	1.22626e-10

## Sheet: ASC1_quiescent
	p_val	avg_logFC	pct.1	pct.2	p_val_adj
Smoc2	0	2.3241	0.961	0.327	0
Cxcl14	0	1.78288	0.762	0.305	0
Crispld2	0	1.51448	0.701	0.139	0
Hsd11b1	0	1.38731	0.71	0.198	0
Apoe	0	1.25514	0.693	0.389	0
Sparcl1	0	1.18665	0.91	0.438	0
Ccl11	0	1.17677	0.973	0.656	0
Gsn	0	1.14652	0.95	0.733	0
Cd81	0	1.11307	0.97	0.701	0
Vwa1	0	1.03065	0.49	0.095	0
Col15a1	0	1.00609	0.914	0.489	0
Col4a1	0	0.965267	0.937	0.56	0
Spry1	0	0.944943	0.546	0.13	0
Abca8a	0	0.941024	0.814	0.379	0
Hspg2	0	0.923956	0.853	0.542	0
G0s2	0	0.886123	0.795	0.34	0
Col5a3	0	0.885093	0.853	0.515	0
Meox1	0	0.883983	0.502	0.148	0
Angptl1	0	0.865462	0.668	0.285	0
Lum	0	0.853297	0.933	0.629	0
Gstt1	0	0.847227	0.791	0.43	0
Fbln7	0	0.828776	0.567	0.248	0
Col4a2	0	0.825407	0.909	0.519	0
Ndufa4l2	0	0.81991	0.606	0.215	0
Anxa5	0	0.817664	0.913	0.64	0
Dcn	0	0.815345	0.974	0.843	0
Cldn15	0	0.773091	0.466	0.148	0
Spon1	0	0.764596	0.365	0.069	0
Plxdc2	0	0.762575	0.81	0.492	0
Mafb	0	0.749676	0.603	0.267	0
Gpm6b	0	0.745275	0.661	0.326	0
Nmb	0	0.731986	0.385	0.128	0
Vtn	0	0.707504	0.381	0.106	0
Lifr	0	0.704707	0.516	0.208	0
Fdps	0	0.696044	0.303	0.095	0
Sc5d	0	0.695714	0.392	0.112	0
Tuba1a	0	0.692226	0.874	0.661	0
Tcf4	0	0.68807	0.792	0.49	0
Ntf3	0	0.686115	0.427	0.105	0
Col6a2	0	0.678667	0.918	0.678	0
Rhoj	0	0.664907	0.857	0.556	0
Jup	0	0.661082	0.425	0.105	0
Podn	0	0.658258	0.555	0.194	0
Lama2	0	0.641093	0.715	0.371	0
Ces1d	0	0.632117	0.386	0.117	0
Col6a1	0	0.615801	0.949	0.737	0
Col6a3	0	0.61181	0.929	0.669	0
Prelp	0	0.61061	0.754	0.408	0
Colec12	0	0.603542	0.517	0.219	0
Malat1	0	0.601043	0.941	0.711	0
Nid2	0	0.588835	0.541	0.236	0
Bmp5	0	0.581801	0.242	0.055	0
Ifngr1	0	0.570549	0.76	0.509	0
Cp	0	0.569254	0.788	0.448	0
Adh1	0	0.556014	0.419	0.17	0
Fads1	0	0.55111	0.363	0.127	0
Mmp2	0	0.548349	0.91	0.685	0
Steap4	0	0.547047	0.741	0.411	0
Itih5	0	0.545909	0.834	0.588	0
2022-09-04	0	0.528941	0.384	0.112	0
Gm14964	0	0.521616	0.222	0.035	0
Ecm2	0	0.517676	0.605	0.299	0
Il17d	0	0.5112	0.324	0.107	0
Col6a6	0	0.51076	0.261	0.057	0
Nfib	0	0.510291	0.882	0.657	0
Abca8b	0	0.509169	0.322	0.083	0
Clec1a	0	0.508062	0.205	0.043	0
Rem1	0	0.503264	0.225	0.05	0
Dpep1	0	0.500141	0.938	0.715	0
Enpp2	0	0.497071	0.761	0.409	0
Lpl	0	0.495245	0.929	0.609	0
Pdgfrb	0	0.495148	0.548	0.258	0
Htra3	0	0.494446	0.905	0.713	0
Pea15a	0	0.488755	0.5	0.239	0
Sqle	0	0.484759	0.216	0.053	0
Cystm1	0	0.482298	0.251	0.051	0
Cd63	0	0.478711	0.962	0.776	0
Igfbp7	0	0.466206	0.962	0.672	0
Serpinf1	0	0.456364	0.909	0.823	0
Entpd2	0	0.442964	0.821	0.548	0
AW112010	0	0.4244	0.753	0.428	0
Cygb	0	0.423416	0.836	0.529	0
Cst3	0	0.286949	0.821	0.596	0
Klf9	6.32751e-301	0.484483	0.814	0.56	1.17844e-296
Lsamp	5.27241e-299	0.4866	0.282	0.091	9.81934e-295
H2-Q10	6.62123e-299	0.704673	0.296	0.105	1.23314e-294
Ggt5	1.70174e-298	0.46544	0.398	0.164	3.16932e-294
Fap	4.79619e-295	0.473229	0.469	0.22	8.93242e-291
Fbln2	9.4468e-294	0.465252	0.77	0.509	1.75937e-289
Lamb1	2.46902e-290	0.514582	0.733	0.495	4.59831e-286
Crip2	1.6758e-288	0.502739	0.75	0.49	3.12102e-284
Nsdhl	2.23685e-287	0.507507	0.231	0.067	4.16591e-283
Laptm4a	1.37433e-286	0.388367	0.939	0.82	2.55955e-282
Cyp2d22	1.5388e-285	0.370035	0.217	0.058	2.86587e-281
Ms4a4d	4.90923e-283	0.43966	0.704	0.427	9.14294e-279
Actb	1.83506e-278	0.520867	0.524	0.25	3.41762e-274
Msmo1	6.0335e-278	0.466993	0.22	0.062	1.12368e-273
Snrk	1.59289e-276	0.529754	0.471	0.236	2.9666e-272
Pten	5.82418e-271	0.514323	0.541	0.307	1.08469e-266
Cyb5a	2.98527e-265	0.37486	0.93	0.782	5.55977e-261
Txnip	5.24733e-265	0.548752	0.701	0.467	9.77262e-261
Timp3	5.65358e-263	0.719061	0.74	0.497	1.05292e-258
Frmd4a	4.87567e-262	0.443451	0.291	0.106	9.08044e-258
Scarf2	6.77957e-262	0.42321	0.328	0.128	1.26263e-257
Serpine1	1.92134e-261	0.727061	0.45	0.229	3.57831e-257
F3	2.27587e-261	0.340231	0.704	0.425	4.23858e-257
Plod1	4.42049e-260	0.530689	0.542	0.314	8.23273e-256
Jun	6.88028e-259	0.661798	0.777	0.665	1.28138e-254
Svep1	3.92038e-258	0.398991	0.589	0.33	7.30131e-254
Scd2	1.42635e-254	0.54645	0.478	0.253	2.65644e-250
Sdc2	4.76595e-254	0.451279	0.765	0.527	8.87611e-250
Itm2b	9.15177e-250	0.328432	0.933	0.843	1.70443e-245
Lhfp	1.19815e-249	0.455768	0.645	0.394	2.23143e-245
Col4a4	1.49274e-249	0.346607	0.256	0.084	2.78007e-245
H2-D1	1.6886e-249	0.445881	0.882	0.742	3.14485e-245
Itm2a	2.6056e-249	0.401683	0.642	0.38	4.85268e-245
Rgmb	1.2397e-248	0.477022	0.384	0.172	2.30882e-244
Mxra8	2.70173e-247	0.427225	0.76	0.52	5.03171e-243
Eps8	3.38239e-246	0.473222	0.349	0.149	6.29936e-242
Serinc3	6.98683e-239	0.40901	0.597	0.36	1.30123e-234
Cpq	7.30122e-236	0.411962	0.73	0.486	1.35978e-231
Ypel3	2.20178e-234	0.406522	0.762	0.541	4.1006e-230
Plin2	8.6433e-233	0.494128	0.666	0.433	1.60973e-228
Slco2b1	3.73805e-231	0.339435	0.282	0.103	6.96174e-227
Nupr1	7.64361e-229	0.438204	0.807	0.631	1.42355e-224
Creb3l1	9.77495e-228	0.434878	0.517	0.284	1.82049e-223
Nav1	1.34995e-227	0.383845	0.712	0.472	2.51414e-223
Gng11	7.05183e-227	0.425467	0.544	0.319	1.31333e-222
Gnb4	3.75109e-226	0.400053	0.356	0.161	6.98603e-222
Adm	9.65911e-220	0.353349	0.307	0.121	1.79891e-215
Kdelr3	1.97804e-218	0.415515	0.68	0.436	3.6839e-214
Eif4g3	1.71178e-217	0.508298	0.495	0.282	3.18803e-213
Psap	2.17745e-217	0.363025	0.869	0.762	4.05528e-213
Fam49a	4.8217e-213	0.399256	0.275	0.109	8.97994e-209
Serpine2	1.09233e-211	0.358747	0.615	0.368	2.03435e-207
Rnase4	2.94562e-211	0.337441	0.901	0.745	5.48592e-207
Spaar	8.5543e-208	0.378758	0.215	0.073	1.59315e-203
Ank2	1.34269e-207	0.407702	0.367	0.173	2.50062e-203
Srebf2	4.29603e-207	0.379072	0.281	0.114	8.00092e-203
Emp2	1.50236e-205	0.375926	0.34	0.153	2.798e-201
Sult1a1	2.27085e-205	0.323744	0.255	0.095	4.22923e-201
Mdk	1.49453e-204	0.452631	0.397	0.201	2.78342e-200
Rora	5.14173e-203	0.396356	0.501	0.282	9.57597e-199
Cd302	1.27568e-202	0.315723	0.863	0.686	2.37582e-198
2022-09-11	7.45383e-201	0.429203	0.484	0.279	1.3882e-196
Rgs10	1.83044e-197	0.428646	0.429	0.232	3.40901e-193
Fam198b	1.10536e-196	0.353094	0.474	0.26	2.05862e-192
Adcyap1r1	2.95325e-194	0.368559	0.233	0.087	5.50013e-190
Hrct1	3.05064e-193	0.343531	0.265	0.107	5.68151e-189
Itpripl2	2.33097e-192	0.404433	0.369	0.183	4.3412e-188
Rabac1	2.69334e-191	0.358702	0.838	0.701	5.01607e-187
Tril	3.50056e-190	0.373051	0.302	0.132	6.51944e-186
Bmper	1.00391e-189	0.371316	0.554	0.335	1.86967e-185
Atf5	1.80044e-189	0.411183	0.661	0.455	3.35315e-185
Tsc22d3	2.25482e-188	0.349008	0.452	0.252	4.19939e-184
Amotl1	2.587e-187	0.401268	0.526	0.318	4.81803e-183
Gpr153	2.30566e-185	0.388259	0.374	0.184	4.29407e-181
Antxr2	8.47929e-184	0.315465	0.537	0.31	1.57918e-179
Cyth3	3.24117e-183	0.358062	0.381	0.193	6.03635e-179
Snhg18	1.60388e-182	0.333197	0.669	0.442	2.98706e-178
Ifitm2	8.20531e-182	0.306422	0.889	0.789	1.52816e-177
Rsrp1	4.87819e-181	0.389157	0.732	0.561	9.08514e-177
Eva1b	2.01342e-177	0.320965	0.689	0.475	3.74979e-173
Alkal2	2.43991e-177	0.29915	0.209	0.075	4.54408e-173
C1qtnf2	4.60914e-175	0.328816	0.307	0.136	8.58406e-171
Ldlr	6.40648e-173	0.324974	0.219	0.083	1.19314e-168
Atp2b4	1.35651e-172	0.304384	0.235	0.092	2.52636e-168
Ltbp4	4.57044e-171	0.25672	0.365	0.176	8.51199e-167
Tm4sf1	7.79816e-170	0.235843	0.363	0.18	1.45233e-165
Adamtsl3	2.95358e-169	0.26427	0.216	0.079	5.50075e-165
Spry2	6.04907e-169	0.363704	0.257	0.107	1.12658e-164
Pik3r2	1.09818e-166	0.371659	0.298	0.14	2.04526e-162
Rarres2	1.28237e-166	0.304501	0.881	0.772	2.38828e-162
Abca9	2.49489e-165	0.31536	0.238	0.096	4.64649e-161
Lgals1	9.49447e-165	0.225464	0.922	0.802	1.76825e-160
Slc29a1	5.79031e-164	0.370476	0.609	0.403	1.07839e-159
Slc50a1	1.56797e-163	0.332122	0.625	0.421	2.92019e-159
Tnfsf12	4.76628e-162	0.337484	0.436	0.245	8.87673e-158
Ppp1r2	1.32844e-161	0.33468	0.636	0.443	2.47409e-157
Marcks	2.11832e-161	0.295534	0.88	0.715	3.94516e-157
Hpgd	3.76422e-161	0.328465	0.206	0.077	7.01049e-157
Dpysl2	2.26946e-159	0.304102	0.477	0.281	4.22664e-155
Bcl2	2.4547e-157	0.307601	0.204	0.078	4.57163e-153
Il34	2.49419e-156	0.416355	0.211	0.084	4.64518e-152
Hmgcs1	4.76119e-153	0.520434	0.317	0.165	8.86725e-149
Pmp22	6.71912e-153	0.321117	0.727	0.548	1.25137e-148
Gstm2	6.47648e-152	0.276944	0.663	0.455	1.20618e-147
Meg3	2.77776e-151	0.325739	0.762	0.568	5.1733e-147
Gstt2	3.28523e-151	0.395355	0.294	0.145	6.11842e-147
Pcyt2	5.30832e-148	0.336252	0.21	0.086	9.88622e-144
Cdk8	5.7113e-148	0.330372	0.232	0.1	1.06367e-143
Ctsk	2.45563e-147	0.301844	0.673	0.466	4.57336e-143
B3gnt9	4.39068e-146	0.348115	0.339	0.177	8.1772e-142
Il11ra1	5.32182e-146	0.230085	0.813	0.641	9.91135e-142
Tmem140	3.17202e-145	0.299186	0.463	0.276	5.90756e-141
H2-M3	4.29935e-144	0.334881	0.348	0.187	8.0071e-140
Itm2c	1.0578e-143	0.292353	0.746	0.563	1.97004e-139
Morf4l1	1.99177e-143	0.289899	0.857	0.735	3.70947e-139
Btg2	6.43141e-143	0.455688	0.688	0.557	1.19779e-138
Dusp1	3.44569e-142	0.451596	0.673	0.517	6.41725e-138
Insig1	5.53025e-141	0.283674	0.249	0.113	1.02995e-136
Selenom	1.57239e-140	0.276088	0.82	0.671	2.92843e-136
Nfic	2.06649e-140	0.368717	0.585	0.417	3.84863e-136
Slc9a3r2	3.06944e-140	0.269443	0.351	0.187	5.71652e-136
Tmsb10	1.72672e-139	0.32586	0.868	0.771	3.21583e-135
Jade1	2.4185e-138	0.383524	0.325	0.177	4.50422e-134
Ptges	4.44659e-138	0.358966	0.358	0.2	8.28134e-134
Pdgfra	4.91606e-137	0.225083	0.75	0.529	9.15566e-133
Angptl2	4.08228e-135	0.311393	0.631	0.44	7.60284e-131
Gstm1	4.66336e-134	0.244156	0.801	0.628	8.68504e-130
Mme	6.37576e-134	0.341414	0.384	0.225	1.18742e-129
Igsf3	6.47336e-134	0.330675	0.223	0.099	1.2056e-129
Cyp27a1	1.31e-132	0.237236	0.239	0.107	2.43975e-128
Hic1	2.01721e-132	0.344879	0.32	0.169	3.75685e-128
Tmem176b	5.91587e-132	0.23998	0.654	0.421	1.10177e-127
Airn	8.05406e-132	0.275327	0.223	0.097	1.49999e-127
Asah1	9.23795e-131	0.285608	0.467	0.294	1.72048e-126
Plvap	1.65268e-130	0.291332	0.252	0.119	3.07795e-126
Oaf	2.62157e-130	0.346574	0.75	0.588	4.88242e-126
Hes1	3.50846e-130	0.275458	0.432	0.255	6.53416e-126
Mid1ip1	5.11996e-130	0.244102	0.213	0.092	9.53542e-126
Akap12	7.00802e-130	0.292773	0.418	0.245	1.30517e-125
Gabarapl1	2.195e-129	0.313762	0.434	0.27	4.08797e-125
Ssh2	2.97282e-129	0.285284	0.347	0.191	5.53659e-125
Fkbp7	6.43144e-129	0.240798	0.784	0.594	1.19779e-124
Aldoa	9.03182e-129	0.213197	0.806	0.616	1.68209e-124
Fermt2	2.04876e-127	0.327894	0.68	0.507	3.8156e-123
Tprgl	2.33934e-126	0.280399	0.576	0.402	4.35679e-122
Aldh2	1.2887e-125	0.321603	0.688	0.561	2.40007e-121
Dynlt3	7.29319e-124	0.288351	0.406	0.246	1.35828e-119
Plpp1	1.30282e-123	0.259607	0.489	0.311	2.42638e-119
Fscn1	4.42306e-123	0.374626	0.471	0.313	8.23751e-119
Tecr	9.14064e-123	0.349075	0.653	0.503	1.70235e-118
Sult5a1	3.96182e-122	0.249108	0.463	0.28	7.37849e-118
Lrp1	7.57064e-122	0.235835	0.797	0.639	1.40996e-117
Cirbp	4.70709e-121	0.254649	0.364	0.205	8.76648e-117
Thsd7a	5.11617e-121	0.29339	0.278	0.141	9.52836e-117
Rassf2	2.10614e-120	0.258544	0.247	0.118	3.92247e-116
Adam23	3.63573e-120	0.305903	0.382	0.228	6.77119e-116
Dtx4	6.27816e-120	0.262853	0.226	0.105	1.16924e-115
Slfn5	1.45592e-119	0.275445	0.721	0.542	2.7115e-115
Arl1	1.93227e-119	0.279564	0.756	0.588	3.59866e-115
Mast4	2.61552e-119	0.289803	0.332	0.184	4.87114e-115
Cd151	6.82023e-119	0.356602	0.479	0.329	1.2702e-114
Arhgap24	1.565e-118	0.279977	0.354	0.204	2.91466e-114
Vcam1	2.36014e-117	0.31464	0.455	0.291	4.39553e-113
Nr1d1	5.36508e-117	0.25854	0.285	0.147	9.99193e-113
Gm26802	6.05191e-117	0.357333	0.366	0.216	1.12711e-112
Sox9	1.0114e-116	0.305112	0.205	0.092	1.88363e-112
Adam19	1.2324e-116	0.329401	0.336	0.194	2.29522e-112
Adgre5	1.97266e-116	0.303816	0.236	0.117	3.67389e-112
Herpud1	2.24229e-116	0.266179	0.437	0.275	4.17604e-112
Myadm	4.11969e-116	0.276452	0.517	0.349	7.67252e-112
Cebpd	6.92671e-116	0.295712	0.737	0.553	1.29003e-111
Cacna2d1	1.0854e-115	0.277258	0.281	0.147	2.02144e-111
Raph1	1.35342e-115	0.317393	0.312	0.174	2.52062e-111
Por	1.94261e-115	0.308238	0.496	0.34	3.61792e-111
Sh3bgrl3	2.08849e-115	0.208036	0.738	0.539	3.88961e-111
Selenos	3.91676e-115	0.26828	0.685	0.522	7.29458e-111
Selenok	4.44552e-115	0.233284	0.83	0.73	8.27934e-111
Sipa1	2.6964e-113	0.267067	0.245	0.121	5.02178e-109
Pttg1ip	5.09572e-113	0.278705	0.519	0.361	9.49028e-109
Tceal9	6.92181e-113	0.235551	0.802	0.628	1.28912e-108
Rbms1	1.63094e-112	0.256851	0.752	0.6	3.03747e-108
Selenof	7.09998e-112	0.246843	0.86	0.749	1.3223e-107
Trf	8.42336e-112	0.599037	0.289	0.161	1.56877e-107
Rrbp1	2.25639e-111	0.241218	0.873	0.745	4.20229e-107
Asap1	4.89718e-111	0.260399	0.508	0.339	9.1205e-107
Clmp	1.04035e-109	0.324672	0.521	0.36	1.93755e-105
Lamc1	2.20157e-109	0.251629	0.742	0.574	4.1002e-105
Mxra7	6.01909e-109	0.236246	0.547	0.376	1.12099e-104
Rhob	2.2007e-108	0.300146	0.532	0.376	4.09858e-104
Srsf5	3.39272e-108	0.295429	0.634	0.487	6.3186e-104
Ier2	7.6949e-108	0.563279	0.618	0.491	1.4331e-103
Spats2l	1.62809e-107	0.286226	0.226	0.11	3.03216e-103
Mageh1	6.49602e-107	0.278878	0.366	0.218	1.20982e-102
Jund	1.25903e-106	0.317793	0.777	0.675	2.34481e-102
Abca6	5.38912e-106	0.240388	0.204	0.093	1.00367e-101
App	3.14596e-105	0.254111	0.743	0.6	5.85903e-101
Pon2	1.17144e-102	0.285174	0.381	0.239	2.1817e-98
Scly	2.70047e-102	0.272287	0.202	0.096	5.02936e-98
Ctsf	6.78537e-102	0.226542	0.348	0.204	1.26371e-97
Atp1a2	3.10167e-101	0.261695	0.331	0.194	5.77655e-97
Tcp11l2	1.39193e-100	0.242211	0.288	0.158	2.59234e-96
Spred1	2.01037e-99	0.27283	0.342	0.205	3.74411e-95
Cdc42ep5	3.22198e-98	0.291495	0.354	0.217	6.00062e-94
Fcgrt	3.89187e-98	0.21877	0.81	0.692	7.24821e-94
Gja1	1.08999e-97	0.218098	0.364	0.22	2.03e-93
H3f3b	4.08288e-96	0.285273	0.754	0.676	7.60395e-92
Junb	1.33533e-95	0.443823	0.65	0.561	2.48692e-91
Arf4	2.58434e-95	0.225598	0.852	0.73	4.81307e-91
Fkbp14	3.07034e-95	0.238955	0.292	0.164	5.7182e-91
Map1lc3a	7.68914e-93	0.233096	0.694	0.56	1.43202e-88
2022-09-07	1.16143e-92	0.250851	0.746	0.619	2.16305e-88
Nrep	7.21968e-92	0.236872	0.35	0.21	1.34459e-87
Pink1	8.094e-92	0.22812	0.431	0.284	1.50743e-87
Apod	2.16335e-91	0.729095	0.626	0.46	4.02901e-87
Fxyd5	3.0195e-91	0.254696	0.449	0.309	5.62352e-87
Kdelr2	8.53115e-91	0.244991	0.614	0.459	1.58884e-86
Aldh1a1	2.82843e-90	0.211513	0.341	0.203	5.26766e-86
Nr3c1	5.50363e-90	0.253689	0.558	0.415	1.025e-85
Fst	5.30974e-89	0.319577	0.691	0.549	9.88886e-85
Cuedc1	8.12706e-89	0.225138	0.249	0.133	1.51358e-84
Smtn	2.07723e-88	0.268642	0.21	0.108	3.86862e-84
Srebf1	3.68035e-88	0.281156	0.259	0.146	6.85428e-84
Fam220a	2.12711e-87	0.260421	0.354	0.226	3.96152e-83
Vamp4	4.90848e-86	0.254785	0.305	0.184	9.14155e-82
Rab2a	2.75662e-85	0.229805	0.787	0.67	5.13392e-81
Slc39a7	1.40336e-84	0.2454	0.514	0.378	2.61362e-80
Myl9	3.04949e-84	0.200627	0.292	0.17	5.67938e-80
Tpst1	1.20446e-83	0.220916	0.567	0.418	2.24318e-79
Cyp20a1	2.06754e-83	0.251587	0.357	0.231	3.85059e-79
Ppp3ca	3.67964e-83	0.24383	0.451	0.319	6.85296e-79
Creb3l2	7.75876e-83	0.226986	0.277	0.159	1.44499e-78
Ubc	1.23373e-82	0.372463	0.674	0.574	2.29769e-78
Zfyve21	1.57587e-82	0.270964	0.447	0.319	2.93491e-78
Atp6v1g1	3.03234e-81	0.204644	0.693	0.566	5.64743e-77
Fosb	3.04008e-81	0.4005	0.626	0.521	5.66184e-77
Zbtb20	1.0155e-80	0.200325	0.891	0.794	1.89126e-76
H2-Q4	1.1045e-79	0.258042	0.346	0.222	2.05702e-75
Trp53i13	1.1177e-78	0.231236	0.346	0.222	2.08161e-74
S100a6	1.3993e-78	0.241985	0.831	0.796	2.60605e-74
Atxn7l3b	4.12631e-78	0.222238	0.635	0.495	7.68484e-74
Rap2b	2.1163e-76	0.238239	0.255	0.149	3.94139e-72
Ssbp2	2.35604e-76	0.216526	0.354	0.23	4.38789e-72
Cdc42	1.04445e-75	0.213997	0.758	0.64	1.94519e-71
Bet1l	1.37643e-75	0.247319	0.316	0.201	2.56346e-71
Rnf167	1.78415e-75	0.227181	0.226	0.126	3.32281e-71
Kmt2e	1.17184e-74	0.234622	0.482	0.352	2.18244e-70
Oat	8.00803e-74	0.217003	0.686	0.566	1.49142e-69
Pofut2	1.06927e-72	0.221979	0.507	0.373	1.9914e-68
Pdzd2	1.42234e-72	0.257069	0.229	0.132	2.64898e-68
Spg20	3.21575e-72	0.205645	0.218	0.12	5.98901e-68
Rab34	8.75438e-71	0.220977	0.485	0.362	1.63042e-66
Erg28	1.38617e-70	0.29396	0.346	0.235	2.5816e-66
Btd	2.387e-70	0.23206	0.233	0.135	4.44555e-66
Srpr	1.28907e-69	0.258533	0.484	0.37	2.40077e-65
H1f0	9.54076e-69	0.242789	0.552	0.419	1.77687e-64
Ehd2	9.73209e-69	0.218853	0.449	0.334	1.8125e-64
Adipor1	1.37524e-66	0.225173	0.428	0.314	2.56125e-62
Tbc1d10a	8.69253e-66	0.204611	0.231	0.135	1.6189e-61
Sec22b	1.23451e-65	0.237539	0.522	0.411	2.29915e-61
Fos	2.44016e-65	0.396508	0.723	0.716	4.54456e-61
Adk	1.50062e-64	0.218788	0.311	0.206	2.79476e-60
Yipf3	2.2407e-63	0.201835	0.538	0.418	4.17309e-59
Kazald1	9.14531e-63	0.204645	0.242	0.145	1.70322e-58
Bin1	9.81065e-63	0.228576	0.322	0.214	1.82714e-58
Anxa6	3.50389e-62	0.200715	0.49	0.378	6.52564e-58
Arf1	3.8409e-62	0.207866	0.74	0.639	7.15329e-58
Egr1	9.59446e-62	0.342767	0.707	0.686	1.78687e-57
Mapre2	8.24143e-61	0.20122	0.25	0.153	1.53488e-56
Ikbip	7.82734e-60	0.212483	0.443	0.332	1.45776e-55
Esyt1	9.02298e-60	0.200464	0.279	0.18	1.68044e-55
H6pd	1.58678e-59	0.221641	0.249	0.156	2.95522e-55
Col27a1	3.84724e-59	0.214468	0.258	0.162	7.1651e-55
Coro1c	1.76209e-56	0.224056	0.279	0.184	3.28171e-52
Mospd1	2.6821e-56	0.248709	0.22	0.136	4.99515e-52
Brd2	1.72088e-55	0.202624	0.575	0.464	3.20497e-51
H13	2.50793e-55	0.201573	0.541	0.438	4.67076e-51
R3hdm4	4.56398e-55	0.201301	0.348	0.246	8.49995e-51
Gadd45b	1.00888e-54	0.24212	0.435	0.331	1.87893e-50
Mesd	1.07172e-54	0.216871	0.37	0.269	1.99597e-50
Hfe	2.50587e-53	0.20639	0.27	0.177	4.66692e-49
Eng	3.86726e-53	0.235658	0.312	0.217	7.20239e-49
Nr1h3	2.30497e-52	0.235801	0.31	0.22	4.29277e-48
Jam3	3.76128e-50	0.200306	0.213	0.132	7.00501e-46
Plekhf1	6.3232e-50	0.20382	0.268	0.177	1.17763e-45
Tigd2	5.42375e-48	0.210699	0.241	0.159	1.01012e-43
Tmem97	2.30728e-47	0.248104	0.254	0.174	4.29708e-43
Scamp2	5.67111e-46	0.211979	0.244	0.163	1.05619e-41
Pkig	8.56908e-38	0.210411	0.343	0.266	1.5959e-33
Hspa1a	4.0684e-27	0.280508	0.256	0.19	7.577e-23
Dnajb1	3.31632e-22	0.293014	0.423	0.364	6.17631e-18

## Sheet: ASC2
	p_val	avg_logFC	pct.1	pct.2	p_val_adj
Pi16	0	3.17965	0.845	0.116	0
Sbsn	0	2.32773	0.66	0.098	0
Anxa3	0	1.99908	0.831	0.163	0
Dmkn	0	1.85637	0.401	0.03	0
Plpp3	0	1.73915	0.908	0.603	0
Fn1	0	1.71448	0.945	0.329	0
Sema3c	0	1.70955	0.719	0.088	0
Ackr3	0	1.65381	0.749	0.145	0
Igfbp6	0	1.63553	0.961	0.399	0
Cd55	0	1.53073	0.67	0.151	0
Krtdap	0	1.50804	0.302	0.013	0
Pcsk6	0	1.49219	0.696	0.163	0
Fbn1	0	1.47955	0.897	0.533	0
Pcolce2	0	1.46433	0.816	0.275	0
Ugdh	0	1.45227	0.736	0.334	0
Mfap5	0	1.44708	0.937	0.477	0
Procr	0	1.44473	0.701	0.228	0
Cd248	0	1.43952	0.837	0.34	0
Ly6c1	0	1.42917	0.87	0.31	0
Pla1a	0	1.4006	0.725	0.313	0
Dpp4	0	1.38621	0.582	0.056	0
Creb5	0	1.3526	0.649	0.125	0
Tmsb4x	0	1.34028	0.791	0.366	0
Anxa1	0	1.31485	0.871	0.508	0
Fndc1	0	1.27598	0.772	0.27	0
Col14a1	0	1.26461	0.805	0.25	0
Emilin2	0	1.25549	0.685	0.205	0
Efhd1	0	1.25512	0.474	0.035	0
Metrnl	0	1.20697	0.722	0.315	0
Mustn1	0	1.19463	0.503	0.069	0
Efemp1	0	1.19021	0.742	0.381	0
Gfpt2	0	1.16395	0.598	0.186	0
Timp2	0	1.12327	0.947	0.708	0
Il1r2	0	1.11698	0.346	0.074	0
Has1	0	1.11656	0.399	0.097	0
Cadm3	0	1.07822	0.481	0.084	0
Lrrn4cl	0	1.05498	0.593	0.175	0
Axl	0	1.02426	0.798	0.484	0
Opcml	0	1.02329	0.407	0.041	0
Igfbp5	0	1.01681	0.685	0.439	0
Aldh1a3	0	1.01445	0.298	0.014	0
Clec3b	0	1.00914	0.945	0.671	0
Tmem100	0	0.996678	0.497	0.128	0
Ace	0	0.983704	0.663	0.277	0
Car8	0	0.979171	0.339	0.023	0
Sfrp2	0	0.9749	0.677	0.165	0
Adgrd1	0	0.971966	0.475	0.096	0
Cd34	0	0.971026	0.866	0.523	0
Adamts5	0	0.967002	0.854	0.548	0
Ptgs2	0	0.956034	0.268	0.044	0
Limch1	0	0.953603	0.328	0.018	0
Tgfbr2	0	0.94538	0.679	0.319	0
Dpt	0	0.937808	0.955	0.726	0
C3	0	0.926994	0.837	0.628	0
Scara5	0	0.919751	0.715	0.363	0
Fstl1	0	0.91791	0.937	0.713	0
S100a10	0	0.917225	0.901	0.658	0
Qpct	0	0.911228	0.562	0.216	0
Stmn4	0	0.895836	0.265	0.013	0
Ly6a	0	0.894787	0.953	0.615	0
Zyx	0	0.865232	0.527	0.194	0
Smpd3	0	0.86252	0.284	0.025	0
Gas7	0	0.851795	0.409	0.121	0
Lurap1l	0	0.847783	0.344	0.047	0
1700019D03Rik	0	0.84761	0.348	0.047	0
Klf4	0	0.846484	0.773	0.457	0
Islr	0	0.839766	0.703	0.412	0
Dact2	0	0.828113	0.226	0.014	0
Dbn1	0	0.820798	0.472	0.178	0
Uqcc2	0	0.814286	0.706	0.487	0
Jpt1	0	0.811128	0.795	0.541	0
Klf2	0	0.809522	0.589	0.319	0
Plat	0	0.803819	0.565	0.245	0
Il18	0	0.80203	0.351	0.076	0
Serpinb6a	0	0.79686	0.889	0.649	0
Tppp3	0	0.783034	0.76	0.406	0
Man1a	0	0.779714	0.635	0.293	0
S100a11	0	0.777253	0.894	0.708	0
Tnxb	0	0.767183	0.744	0.498	0
Marcks	0	0.765031	0.868	0.685	0
Lsp1	0	0.754754	0.552	0.247	0
Zfp385a	0	0.751585	0.378	0.12	0
Mt2	0	0.744696	0.694	0.493	0
Pamr1	0	0.738106	0.348	0.076	0
Crip1	0	0.737948	0.793	0.559	0
Basp1	0	0.736775	0.549	0.3	0
Heg1	0	0.73477	0.579	0.308	0
Ptgis	0	0.733313	0.349	0.081	0
Ablim1	0	0.732683	0.525	0.218	0
Flrt2	0	0.732392	0.382	0.118	0
Fez1	0	0.728729	0.309	0.048	0
Ecm1	0	0.728059	0.697	0.41	0
Prss23	0	0.724858	0.703	0.463	0
Scara3	0	0.71597	0.511	0.217	0
Tmem158	0	0.713767	0.319	0.088	0
Ppp1r14b	0	0.712277	0.712	0.447	0
Galnt16	0	0.709663	0.314	0.058	0
Errfi1	0	0.706734	0.529	0.309	0
Ahnak	0	0.701941	0.849	0.665	0
Arl4d	0	0.701483	0.235	0.022	0
Ckb	0	0.697324	0.485	0.266	0
Vasn	0	0.696968	0.404	0.163	0
Uchl1	0	0.695864	0.242	0.034	0
Ahnak2	0	0.693848	0.588	0.3	0
Lims2	0	0.692115	0.379	0.114	0
Nov	0	0.683394	0.213	0.026	0
Tek	0	0.67829	0.333	0.098	0
Ogn	0	0.673567	0.829	0.567	0
Gngt2	0	0.670839	0.38	0.165	0
Nfkbia	0	0.667351	0.725	0.561	0
Il33	0	0.667275	0.32	0.095	0
Aif1l	0	0.666026	0.218	0.029	0
Vegfd	0	0.664361	0.401	0.181	0
Uap1	0	0.663792	0.525	0.33	0
Atox1	0	0.658719	0.759	0.626	0
Fyn	0	0.653348	0.434	0.184	0
Csrp2	0	0.652549	0.582	0.413	0
Lbp	0	0.641227	0.468	0.279	0
Actg1	0	0.640073	0.827	0.632	0
Trio	0	0.631483	0.344	0.124	0
Lgi2	0	0.629335	0.422	0.182	0
Ddah2	0	0.625111	0.707	0.47	0
Ptgs1	0	0.624418	0.228	0.037	0
Mgll	0	0.62341	0.422	0.149	0
Ildr2	0	0.61676	0.238	0.045	0
Cyr61	0	0.613168	0.518	0.303	0
Antxr1	0	0.612164	0.522	0.273	0
Nid1	0	0.607402	0.874	0.729	0
Adam33	0	0.605973	0.379	0.169	0
Slco3a1	0	0.600773	0.334	0.127	0
S100a13	0	0.596406	0.78	0.641	0
Clip4	0	0.589424	0.221	0.031	0
Ddr2	0	0.586466	0.634	0.444	0
S100a16	0	0.584789	0.765	0.593	0
Nova1	0	0.582587	0.298	0.1	0
Prg4	0	0.580486	0.276	0.102	0
Bmp1	0	0.579682	0.679	0.502	0
Pde8a	0	0.572717	0.283	0.089	0
Nbl1	0	0.56477	0.649	0.346	0
Cmah	0	0.562608	0.222	0.037	0
Maf	0	0.555955	0.32	0.138	0
Rps24	0	0.553081	0.934	0.811	0
Rps15	0	0.546968	0.891	0.767	0
Dact1	0	0.543388	0.303	0.107	0
Rpl21	0	0.538582	0.872	0.771	0
Rpl30	0	0.528592	0.869	0.755	0
Rpl37a	0	0.526652	0.888	0.797	0
Thbs3	0	0.5224	0.381	0.146	0
Calml4	0	0.497236	0.245	0.072	0
Ifi27l2a	0	0.493919	0.81	0.495	0
Gda	0	0.48991	0.283	0.093	0
Myl6	0	0.489438	0.816	0.683	0
Serping1	0	0.481016	0.889	0.754	0
Rpl35a	0	0.480323	0.905	0.822	0
Rps20	0	0.478854	0.917	0.794	0
Rps29	0	0.478258	0.879	0.788	0
Prrx1	0	0.476486	0.679	0.511	0
Plce1	0	0.467599	0.222	0.065	0
Sema3b	0	0.464489	0.204	0.054	0
Rps4x	0	0.462675	0.929	0.825	0
Fau	0	0.456341	0.848	0.762	0
Rps26	0	0.450424	0.852	0.742	0
Arsi	0	0.449889	0.236	0.081	0
Rpl23	0	0.446123	0.931	0.826	0
Rps3a1	0	0.444709	0.951	0.834	0
Tubb2b	0	0.443525	0.215	0.06	0
Loxl1	0	0.438531	0.788	0.642	0
Igfbp4	0	0.435797	0.893	0.738	0
Rps10	0	0.434704	0.879	0.761	0
Aebp1	0	0.428716	0.84	0.7	0
Eef1a1	0	0.427224	0.962	0.871	0
Rps11	0	0.420698	0.914	0.808	0
Rpl31	0	0.416536	0.868	0.774	0
Gpc3	0	0.41317	0.441	0.239	0
S100a6	0	0.401433	0.897	0.761	0
Rpl13	0	0.399925	0.962	0.865	0
Rps8	0	0.387676	0.894	0.782	0
Rps5	0	0.3724	0.94	0.838	0
Rpl17	0	0.358797	0.901	0.819	0
Rps14	0	0.355099	0.942	0.86	0
Rps23	0	0.31238	0.947	0.872	0
Rplp1	4.62407e-302	0.399481	0.859	0.766	8.61186e-298
Ecscr	1.36913e-299	0.503593	0.217	0.075	2.54987e-295
Rpl5	8.75232e-296	0.417713	0.836	0.724	1.63003e-291
Calm1	3.29896e-294	0.498896	0.792	0.674	6.14398e-290
Olfml2b	9.05388e-293	0.436503	0.486	0.291	1.6862e-288
Pdpn	1.55469e-291	0.487082	0.366	0.185	2.89546e-287
Sirpa	2.41117e-291	0.505525	0.271	0.114	4.49056e-287
Cdon	1.59791e-289	0.437887	0.254	0.097	2.97594e-285
Il13ra1	2.04321e-286	0.45348	0.215	0.075	3.80528e-282
Rps27a	2.85607e-286	0.325982	0.924	0.836	5.31915e-282
Cpne8	4.12969e-286	0.444112	0.241	0.092	7.69114e-282
Rpl26	9.85773e-284	0.33562	0.892	0.811	1.8359e-279
Osr1	1.39625e-282	0.287641	0.376	0.18	2.60037e-278
Rpl38	1.50667e-282	0.446341	0.818	0.725	2.80601e-278
Agpat4	3.49801e-280	0.500324	0.378	0.204	6.51469e-276
Cd47	9.65613e-280	0.422665	0.792	0.676	1.79836e-275
Triobp	3.37689e-278	0.494018	0.367	0.198	6.28911e-274
Gstm1	1.31595e-276	0.494985	0.74	0.617	2.45083e-272
Myof	1.78331e-273	0.446836	0.234	0.09	3.32124e-269
Arhgap20	2.16968e-272	0.451198	0.294	0.13	4.04081e-268
Tpt1	2.06945e-271	0.29692	0.927	0.857	3.85414e-267
Rpl23a	1.54447e-268	0.321155	0.926	0.846	2.87642e-264
Cdkn1c	9.55742e-268	0.714202	0.404	0.236	1.77997e-263
Lrrc17	1.73776e-267	0.48278	0.414	0.233	3.23641e-263
Plac8	5.11215e-263	0.39785	0.443	0.242	9.52086e-259
Pdlim1	7.87324e-263	0.455773	0.305	0.147	1.46631e-258
Rpl7	3.66409e-262	0.322782	0.89	0.792	6.824e-258
Timp3	1.09834e-261	0.228099	0.668	0.476	2.04555e-257
Rpl37	5.26866e-259	0.372206	0.871	0.803	9.81235e-255
Rps15a	2.81919e-256	0.308319	0.912	0.834	5.25046e-252
Rpl34	8.92016e-252	0.320715	0.89	0.824	1.66129e-247
Vldlr	1.01253e-249	0.460617	0.324	0.162	1.88574e-245
Rps17	2.85621e-248	0.312744	0.899	0.823	5.31941e-244
Mmp23	4.32093e-246	0.389002	0.629	0.463	8.04729e-242
Anxa2	7.58562e-245	0.468451	0.79	0.672	1.41275e-240
Tns1	2.21717e-239	0.440024	0.406	0.242	4.12925e-235
Kif2a	4.4167e-239	0.515477	0.353	0.201	8.22567e-235
Rnase4	6.80185e-237	0.3265	0.863	0.728	1.26678e-232
Klf3	1.40224e-236	0.494024	0.45	0.292	2.61153e-232
Glud1	9.34442e-236	0.480663	0.509	0.364	1.7403e-231
Rps25	4.28575e-235	0.357626	0.858	0.779	7.98178e-231
Atf3	2.18271e-233	0.559445	0.513	0.348	4.06507e-229
Ebf1	1.03899e-232	0.422474	0.79	0.717	1.93501e-228
Eef1b2	4.906e-230	0.355989	0.834	0.724	9.13693e-226
Vgll3	7.03735e-230	0.43526	0.267	0.123	1.31064e-225
Emp3	2.27188e-227	0.412418	0.747	0.629	4.23114e-223
Rps3	3.82772e-226	0.253732	0.926	0.835	7.12874e-222
Epdr1	1.8494e-225	0.367369	0.27	0.125	3.44431e-221
Rps7	4.24538e-224	0.311518	0.891	0.812	7.9066e-220
Ramp2	1.70998e-223	0.433616	0.699	0.579	3.18467e-219
Adamts2	2.49525e-223	0.385688	0.631	0.484	4.64716e-219
Blvrb	9.06026e-221	0.428651	0.61	0.484	1.68738e-216
Sat1	2.26016e-219	0.486428	0.623	0.479	4.20933e-215
Ext1	7.72793e-218	0.450473	0.326	0.179	1.43925e-213
Apbb2	1.12222e-216	0.430699	0.252	0.117	2.09002e-212
Txn1	7.97243e-215	0.400283	0.819	0.722	1.48479e-210
Cavin3	1.54999e-211	0.346562	0.826	0.744	2.88669e-207
Rock2	5.75868e-209	0.462326	0.49	0.351	1.0725e-204
Rpl4	5.47133e-208	0.272073	0.896	0.813	1.01898e-203
Tshz2	6.70793e-208	0.449708	0.589	0.467	1.24928e-203
Ptx3	5.05609e-207	0.603264	0.284	0.144	9.41646e-203
Kdelc2	3.8783e-205	0.455201	0.35	0.207	7.22294e-201
Meg3	5.33835e-205	0.467204	0.703	0.551	9.94214e-201
Rpl27a	4.279e-204	0.259671	0.908	0.835	7.96921e-200
Il1rl2	6.1811e-204	0.405426	0.248	0.116	1.15117e-199
Rplp2	2.59372e-203	0.345092	0.842	0.757	4.83054e-199
Fbln5	9.17524e-202	0.386839	0.505	0.349	1.7088e-197
Thy1	1.2925e-201	0.486045	0.586	0.455	2.40715e-197
Vat1	5.38385e-200	0.406395	0.536	0.395	1.00269e-195
Tnfaip6	6.76903e-200	0.667997	0.572	0.437	1.26066e-195
Rps28	1.02093e-199	0.328589	0.867	0.809	1.90137e-195
Tmeff2	4.47374e-196	0.356967	0.534	0.381	8.33189e-192
Rps19	1.5473e-195	0.248067	0.916	0.844	2.8817e-191
Cxcl13	2.30886e-195	0.734313	0.387	0.236	4.30002e-191
Ntn1	1.04624e-194	0.342637	0.228	0.102	1.94851e-190
Hdac7	2.08316e-194	0.418926	0.292	0.156	3.87967e-190
Rpl8	7.02967e-194	0.240458	0.891	0.802	1.30921e-189
Pfdn5	1.7057e-193	0.34071	0.81	0.751	3.1767e-189
Rps16	5.61664e-192	0.255632	0.912	0.836	1.04604e-187
Lamb2	1.09364e-190	0.321368	0.388	0.231	2.0368e-186
Rspo3	4.4261e-190	0.445876	0.221	0.102	8.24317e-186
Rps13	8.16081e-188	0.289227	0.874	0.792	1.51987e-183
Vim	4.29326e-186	0.289567	0.894	0.807	7.99577e-182
Rpl32	6.67708e-186	0.216038	0.93	0.854	1.24354e-181
Medag	8.22785e-185	0.389862	0.526	0.377	1.53235e-180
Rpl22	6.58782e-184	0.359651	0.8	0.724	1.22692e-179
Ltbp1	2.7726e-183	0.40272	0.391	0.247	5.16369e-179
Pygl	1.32698e-182	0.381563	0.208	0.094	2.47137e-178
Samhd1	3.15037e-179	0.465938	0.351	0.22	5.86725e-175
Pmepa1	1.19992e-178	0.308135	0.294	0.158	2.23474e-174
Lpar1	1.29663e-177	0.377693	0.468	0.325	2.41484e-173
Bag1	8.99294e-176	0.399213	0.633	0.541	1.67484e-171
Smim14	5.19182e-172	0.345012	0.704	0.615	9.66925e-168
Camk2n1	5.59948e-172	0.346527	0.286	0.154	1.04285e-167
Nenf	1.94919e-170	0.308924	0.812	0.742	3.63018e-166
Atp2b1	5.86941e-169	0.418447	0.496	0.377	1.09312e-164
Rpl14	1.0367e-168	0.238489	0.885	0.809	1.93075e-164
Rhoa	3.99804e-168	0.397862	0.703	0.626	7.44595e-164
Sulf1	2.28355e-167	0.403741	0.298	0.17	4.25288e-163
Rpl28	1.05355e-165	0.257674	0.879	0.798	1.96214e-161
Rpl36	4.58851e-163	0.29229	0.852	0.792	8.54563e-159
Rpl39	4.73774e-162	0.286766	0.856	0.797	8.82357e-158
Irak3	1.09411e-160	0.354962	0.203	0.095	2.03767e-156
Plekho2	4.96862e-159	0.368892	0.205	0.098	9.25355e-155
Aig1	7.68917e-158	0.366049	0.286	0.165	1.43203e-153
Nptn	1.91235e-157	0.403707	0.524	0.418	3.56157e-153
Thbd	3.90673e-157	0.380967	0.291	0.166	7.27589e-153
Ctsl	3.789e-154	0.249325	0.842	0.722	7.05664e-150
St3gal2	1.8964e-153	0.369955	0.289	0.168	3.53186e-149
Ar	1.31227e-152	0.359714	0.467	0.336	2.44397e-148
Rps18	1.73651e-151	0.241434	0.88	0.819	3.23408e-147
Fgfr1	2.94523e-150	0.395984	0.566	0.47	5.48519e-146
Agap1	1.69668e-148	0.324059	0.225	0.115	3.1599e-144
Sulf2	1.09014e-147	0.382837	0.276	0.161	2.03027e-143
Edem2	2.24543e-146	0.385379	0.29	0.175	4.1819e-142
Filip1l	2.84703e-144	0.334246	0.299	0.178	5.30231e-140
Fhl1	3.08185e-144	0.377428	0.415	0.296	5.73964e-140
Anpep	4.38858e-144	0.320671	0.303	0.179	8.17329e-140
Rhoc	1.4615e-143	0.320091	0.677	0.569	2.72189e-139
Cltb	3.17898e-141	0.376103	0.481	0.376	5.92054e-137
Vcan	8.47212e-141	0.389226	0.422	0.305	1.57785e-136
Snx21	1.35347e-140	0.401282	0.296	0.184	2.52069e-136
Lama4	2.91612e-139	0.378267	0.53	0.434	5.43099e-135
Gnpnat1	3.56224e-139	0.420039	0.331	0.221	6.63431e-135
Rpl35	3.90635e-138	0.336209	0.705	0.64	7.27519e-134
Rbpj	7.18843e-131	0.368251	0.298	0.188	1.33877e-126
Akr1b8	8.6062e-129	0.439731	0.311	0.206	1.60282e-124
Eef2	3.91788e-128	0.307056	0.788	0.731	7.29665e-124
Slc43a3	2.4765e-127	0.403132	0.627	0.562	4.61224e-123
Foxp1	3.22125e-127	0.334391	0.34	0.225	5.99926e-123
Il6	9.08302e-127	0.528616	0.233	0.128	1.69162e-122
Rap1a	1.12347e-125	0.3556	0.562	0.485	2.09235e-121
Carhsp1	7.18989e-125	0.38119	0.47	0.373	1.33905e-120
Rab7b	1.07669e-124	0.315016	0.238	0.133	2.00523e-120
Lamc1	1.97418e-124	0.307639	0.658	0.573	3.67672e-120
Ralbp1	6.89758e-123	0.350893	0.555	0.472	1.2846e-118
Naaa	1.38356e-121	0.382554	0.367	0.262	2.57675e-117
Dpysl3	7.55703e-119	0.337929	0.398	0.29	1.40742e-114
Mrpl33	2.68692e-118	0.323802	0.614	0.529	5.00412e-114
Rpl36a	5.54387e-118	0.348505	0.717	0.665	1.03249e-113
Dcbld2	1.49154e-117	0.311368	0.208	0.113	2.77784e-113
Cnn2	2.05471e-117	0.293836	0.203	0.108	3.82669e-113
Rps21	4.86735e-117	0.318598	0.779	0.716	9.06496e-113
Dtnbp1	2.99986e-114	0.332358	0.527	0.45	5.58695e-110
Slc4a4	7.48551e-113	0.340864	0.258	0.16	1.3941e-108
Tgfbr3	2.84773e-112	0.360901	0.489	0.398	5.30361e-108
Prdx5	7.83562e-112	0.359329	0.684	0.64	1.4593e-107
Ugp2	9.02366e-112	0.341962	0.393	0.294	1.68057e-107
Actb	7.39091e-111	0.397075	0.379	0.253	1.37648e-106
Ebf2	1.08208e-109	0.375381	0.555	0.482	2.01527e-105
Efemp2	4.99313e-109	0.312212	0.64	0.575	9.29921e-105
Diaph1	2.37644e-108	0.327562	0.241	0.146	4.42587e-104
Ier3	6.81399e-108	0.41827	0.38	0.275	1.26904e-103
Add3	7.35965e-107	0.3326	0.49	0.398	1.37066e-102
Sod3	7.50521e-107	0.272875	0.51	0.412	1.39777e-102
Npr1	4.23532e-104	0.364373	0.261	0.169	7.88786e-100
Rpl11	6.93301e-104	0.226708	0.855	0.809	1.2912e-99
C4b	8.83471e-104	0.268389	0.373	0.263	1.64538e-99
Rack1	4.69509e-103	0.206457	0.825	0.737	8.74413e-99
Ang	7.32645e-102	0.334102	0.318	0.219	1.36448e-97
Tubb6	7.35336e-101	0.251955	0.484	0.378	1.36949e-96
Antxr2	7.446e-101	0.289939	0.419	0.312	1.38674e-96
Clip1	8.61891e-100	0.360466	0.285	0.193	1.60519e-95
Nr4a1	1.38853e-98	0.37816	0.267	0.172	2.586e-94
Rap1b	2.58114e-98	0.301322	0.574	0.506	4.80712e-94
Lgals3	3.52576e-98	0.271857	0.316	0.216	6.56637e-94
Ehd1	7.42821e-98	0.352809	0.369	0.283	1.38343e-93
Sec14l1	1.27568e-97	0.290401	0.233	0.143	2.37583e-93
Sntb2	1.33276e-96	0.320887	0.503	0.42	2.48214e-92
Thbs2	1.54308e-96	0.331792	0.34	0.238	2.87383e-92
Ccdc80	1.7192e-93	0.229223	0.786	0.717	3.20185e-89
Gpx1	4.49674e-93	0.32569	0.634	0.57	8.37474e-89
Mtch1	2.12503e-90	0.295267	0.603	0.551	3.95765e-86
Zeb1	5.26987e-90	0.33571	0.355	0.266	9.81461e-86
Cast	5.96092e-90	0.318417	0.448	0.371	1.11016e-85
Ccnl1	8.26127e-90	0.354341	0.584	0.525	1.53858e-85
Col1a1	1.61615e-89	0.315638	0.812	0.723	3.00992e-85
Trim35	3.01495e-88	0.344413	0.366	0.279	5.61504e-84
Use1	7.59005e-87	0.303568	0.607	0.553	1.41357e-82
Cavin1	8.01153e-87	0.294082	0.631	0.571	1.49207e-82
Aspn	1.07028e-86	0.267077	0.644	0.537	1.99328e-82
Rpl41	1.05287e-84	0.233621	0.811	0.782	1.96087e-80
Cebpd	9.68631e-84	0.282556	0.644	0.553	1.80398e-79
Csf1	1.66897e-82	0.306098	0.419	0.332	3.10829e-78
Itgb5	4.58837e-82	0.286723	0.436	0.35	8.54538e-78
Dst	2.09107e-81	0.282474	0.292	0.205	3.89441e-77
Nfe2l2	8.21486e-81	0.330196	0.391	0.315	1.52994e-76
Rab3il1	1.47765e-78	0.240093	0.218	0.137	2.75197e-74
Tubb2a	4.43364e-76	0.255122	0.392	0.304	8.25722e-72
Nfix	6.42227e-76	0.258433	0.613	0.568	1.19608e-71
Dlgap4	1.96072e-75	0.272218	0.346	0.262	3.65164e-71
Calu	1.33831e-74	0.274329	0.637	0.596	2.49247e-70
Twsg1	3.72177e-73	0.275695	0.285	0.203	6.93142e-69
Rhoq	1.49083e-71	0.299415	0.276	0.198	2.77652e-67
Spag9	2.05047e-70	0.289062	0.37	0.296	3.81879e-66
Ptp4a2	2.84157e-70	0.253731	0.604	0.563	5.29214e-66
Dynll1	3.98457e-70	0.203063	0.77	0.723	7.42087e-66
Ybx3	3.20487e-69	0.243805	0.58	0.515	5.96876e-65
Samd4b	1.31958e-68	0.26881	0.247	0.172	2.45758e-64
Adamtsl1	4.9438e-67	0.229087	0.34	0.253	9.20734e-63
Tmem43	7.72227e-65	0.282941	0.251	0.179	1.43819e-60
Fam129a	3.80029e-64	0.276065	0.33	0.255	7.07765e-60
Rps27rt	6.76037e-63	0.28676	0.382	0.313	1.25905e-58
Gprc5b	2.58192e-62	0.293178	0.252	0.182	4.80857e-58
Loxl2	3.39167e-61	0.287997	0.507	0.45	6.31664e-57
Postn	6.40652e-59	0.320107	0.491	0.403	1.19315e-54
Slc44a1	3.1715e-58	0.245455	0.278	0.206	5.90661e-54
Zbp1	9.67575e-58	0.306042	0.284	0.214	1.80201e-53
Glul	1.86818e-57	0.22462	0.49	0.43	3.47929e-53
Adam15	1.03452e-55	0.257715	0.27	0.202	1.92669e-51
Rnh1	1.97191e-55	0.241219	0.538	0.495	3.67248e-51
Hspb8	4.21412e-55	0.32048	0.311	0.251	7.84838e-51
Stx4a	8.54041e-55	0.280038	0.421	0.367	1.59057e-50
Pgm3	2.97243e-54	0.243931	0.202	0.14	5.53586e-50
Cdkn1a	4.72575e-54	0.392019	0.339	0.277	8.80123e-50
Lgals9	1.32668e-52	0.285014	0.394	0.338	2.4708e-48
Efcab14	3.13069e-52	0.293361	0.254	0.193	5.8306e-48
Pxdn	4.89189e-52	0.233106	0.236	0.171	9.11065e-48
Atp6v1e1	1.94851e-51	0.288199	0.405	0.356	3.6289e-47
Grb10	3.39783e-51	0.264496	0.354	0.291	6.32812e-47
Ier5	4.42364e-51	0.304393	0.39	0.324	8.23859e-47
Mindy2	3.02763e-49	0.232591	0.278	0.213	5.63866e-45
Fez2	1.65045e-48	0.218107	0.236	0.174	3.07379e-44
Trip10	1.79441e-48	0.251074	0.301	0.24	3.3419e-44
Jak1	3.16109e-48	0.235743	0.546	0.509	5.88722e-44
Galnt1	7.62357e-48	0.284603	0.296	0.24	1.41981e-43
Pam	1.07306e-47	0.21849	0.396	0.325	1.99846e-43
Wnt5a	1.76555e-46	0.237387	0.255	0.191	3.28816e-42
Ifi204	5.76261e-45	0.207652	0.579	0.524	1.07323e-40
Micu1	8.74431e-43	0.223539	0.201	0.147	1.62854e-38
Kcnq1ot1	9.64201e-43	0.308941	0.467	0.431	1.79573e-38
Klhl13	1.7296e-42	0.20728	0.22	0.162	3.2212e-38
Camk2d	2.56326e-41	0.242949	0.361	0.308	4.77381e-37
Cd164	2.61682e-40	0.240783	0.463	0.427	4.87357e-36
Rras	3.44549e-40	0.204838	0.44	0.39	6.41689e-36
Ccnd3	7.00774e-40	0.258478	0.327	0.281	1.30512e-35
Utrn	1.79159e-38	0.241973	0.238	0.185	3.33666e-34
Pts	3.06762e-38	0.248027	0.217	0.168	5.71313e-34
Adamts1	7.32632e-38	0.265574	0.447	0.401	1.36445e-33
Plec	1.34653e-37	0.20189	0.203	0.152	2.50777e-33
Cdc42ep2	4.78789e-37	0.21739	0.246	0.192	8.91697e-33
Palm	6.65302e-37	0.218848	0.281	0.228	1.23906e-32
Foxo1	1.34068e-35	0.257618	0.244	0.195	2.49689e-31
Nqo2	3.82661e-34	0.234485	0.229	0.182	7.12668e-30
Nisch	4.92168e-34	0.240286	0.445	0.411	9.16613e-30
Tns2	1.72359e-33	0.229629	0.251	0.201	3.21002e-29
Glipr2	2.26765e-31	0.219507	0.318	0.273	4.22327e-27
Cxcl1	1.36788e-28	0.299418	0.523	0.474	2.54755e-24
Mylip	8.68124e-28	0.222613	0.203	0.16	1.61679e-23
Kras	1.05182e-26	0.206369	0.252	0.212	1.95892e-22
Cyfip1	1.53898e-25	0.217271	0.251	0.212	2.8662e-21
Thra	2.27844e-25	0.203448	0.394	0.362	4.24336e-21
Ifi205	6.62279e-25	0.212983	0.347	0.306	1.23343e-20
Mt1	7.60642e-24	0.236255	0.646	0.616	1.41662e-19
Gm10073	1.79078e-23	0.238115	0.369	0.345	3.33514e-19
Nol7	4.05781e-17	0.204034	0.36	0.344	7.55727e-13
Cthrc1	1.25645e-13	0.82732	0.215	0.199	2.34001e-09

## Sheet: ASC3
	p_val	avg_logFC	pct.1	pct.2	p_val_adj
Inmt	0	2.18422	0.664	0.181	0
Gdf10	0	2.05777	0.656	0.125	0
Sfrp4	0	1.88401	0.45	0.138	0
Cst3	0	1.83909	0.885	0.594	0
Mgp	0	1.80606	0.541	0.203	0
Gas6	0	1.74779	0.613	0.231	0
Clec11a	0	1.66335	0.538	0.119	0
Cfh	0	1.65737	0.516	0.073	0
Fmo2	0	1.53498	0.385	0.027	0
Tgfbi	0	1.53199	0.577	0.218	0
Chrdl1	0	1.48626	0.427	0.044	0
Penk	0	1.47816	0.398	0.09	0
Cd9	0	1.45369	0.784	0.36	0
C7	0	1.27249	0.304	0.029	0
Fbln1	0	1.22476	0.593	0.294	0
Itgbl1	0	1.21497	0.328	0.044	0
Vit	0	1.21255	0.402	0.062	0
Cpe	0	1.17357	0.307	0.04	0
Osr1	0	1.14568	0.468	0.207	0
Rbp1	0	1.14021	0.556	0.293	0
C2	0	1.09044	0.432	0.189	0
Abi3bp	0	1.06194	0.659	0.446	0
Cygb	0	1.04393	0.751	0.55	0
Selenop	0	0.986545	0.862	0.719	0
Pid1	0	0.959852	0.387	0.14	0
Meox2	0	0.949869	0.34	0.118	0
Igfbp7	0	0.930777	0.907	0.688	0
Arhgdib	0	0.923349	0.22	0.028	0
Ltbp4	0	0.92331	0.416	0.175	0
Il11ra1	0	0.868932	0.765	0.652	0
Gsn	0	0.837278	0.918	0.744	0
Tspan11	0	0.791353	0.207	0.04	0
Serping1	0	0.686233	0.906	0.778	0
Dcn	0	0.643054	0.934	0.852	0
F3	3.09696e-286	1.18566	0.63	0.443	5.76778e-282
Ecm1	1.4177e-272	0.898435	0.664	0.472	2.64032e-268
Fth1	6.73653e-249	0.55617	0.885	0.891	1.25461e-244
Nr2f2	3.77514e-242	0.914574	0.26	0.091	7.03082e-238
Nbl1	1.41209e-241	0.883339	0.609	0.411	2.62987e-237
Cxcl12	8.80161e-241	1.16362	0.594	0.416	1.63921e-236
Gpnmb	6.48302e-232	0.817756	0.339	0.147	1.2074e-227
Igfbp6	8.93211e-229	0.55654	0.819	0.53	1.66352e-224
Igfbp3	5.42365e-214	1.39494	0.263	0.099	1.0101e-209
Mmp3	6.33649e-206	1.28594	0.411	0.211	1.18011e-201
Lamb2	4.84213e-202	0.729281	0.45	0.254	9.01797e-198
Pcolce2	1.93243e-182	0.46817	0.641	0.405	3.59895e-178
Clec3b	2.16065e-179	0.458554	0.868	0.736	4.024e-175
Mfap4	5.74575e-165	1.28964	0.223	0.088	1.07009e-160
Pdgfrl	2.4256e-159	0.868504	0.277	0.129	4.51744e-155
Cryab	1.52534e-157	0.713495	0.504	0.341	2.8408e-153
Bgn	2.36277e-157	0.633157	0.765	0.622	4.40043e-153
Gadd45g	1.08271e-154	0.939178	0.595	0.472	2.01644e-150
Fgl2	5.84785e-152	0.670213	0.308	0.152	1.0891e-147
Cd302	5.12932e-150	0.606239	0.741	0.708	9.55285e-146
Nrp1	2.04792e-135	0.810656	0.412	0.279	3.81405e-131
Col1a2	6.5291e-132	0.569484	0.882	0.837	1.21598e-127
Gas1	7.28536e-128	0.728087	0.541	0.42	1.35682e-123
Cyba	6.17443e-123	0.627739	0.667	0.603	1.14993e-118
Prnp	2.68552e-122	0.689024	0.468	0.347	5.00151e-118
Apod	6.11709e-111	0.908239	0.587	0.47	1.13925e-106
Nfib	1.65174e-100	0.554079	0.697	0.689	3.0762e-96
Olfml2b	2.86103e-100	0.603689	0.45	0.334	5.32839e-96
Srpx	2.30364e-98	0.551973	0.661	0.591	4.2903e-94
Entpd2	2.42635e-98	0.547691	0.65	0.579	4.51883e-94
Itm2b	1.89351e-93	0.302238	0.874	0.854	3.52648e-89
Fgf7	1.532e-88	0.560656	0.259	0.147	2.8532e-84
Podn	3.83374e-88	0.582134	0.352	0.232	7.13996e-84
Hexb	7.07635e-86	0.678733	0.458	0.374	1.3179e-81
Scara5	9.1953e-82	0.437647	0.568	0.453	1.71253e-77
Id2	3.43e-80	0.750187	0.458	0.364	6.38803e-76
Ablim1	6.58374e-79	0.472851	0.413	0.294	1.22616e-74
Gpx3	2.97022e-76	0.697576	0.72	0.724	5.53174e-72
Igf1	1.09101e-75	0.595963	0.546	0.469	2.03189e-71
Thbs3	7.35266e-75	0.471552	0.315	0.201	1.36936e-70
Ahnak	2.96008e-74	0.444104	0.729	0.718	5.51286e-70
Ntn1	1.11874e-73	0.467516	0.227	0.127	2.08354e-69
Cd81	1.52134e-73	0.397224	0.788	0.733	2.83334e-69
Frmd6	1.81083e-72	0.5872	0.404	0.31	3.37249e-68
Amy1	5.43372e-67	0.523779	0.222	0.13	1.01198e-62
Col3a1	1.20751e-65	0.382713	0.839	0.821	2.24886e-61
Sfrp1	4.7536e-65	0.73894	0.321	0.226	8.85311e-61
Eln	2.22096e-64	0.882273	0.312	0.225	4.13631e-60
Timp2	6.53204e-64	0.211048	0.829	0.771	1.21653e-59
Gstm1	8.00416e-64	0.403103	0.679	0.65	1.4907e-59
Tmem59	4.04755e-63	0.433163	0.706	0.706	7.53816e-59
Col14a1	2.54011e-62	0.383116	0.516	0.399	4.7307e-58
Malat1	1.35538e-61	0.235039	0.812	0.736	2.52426e-57
Gpc3	6.25985e-60	0.544306	0.384	0.287	1.16584e-55
Steap4	8.09389e-60	0.486177	0.522	0.451	1.50741e-55
Ecm2	1.80678e-54	0.553621	0.411	0.334	3.36495e-50
Bsg	1.35498e-53	0.391871	0.76	0.797	2.52351e-49
Id3	1.31063e-52	0.544261	0.574	0.511	2.44091e-48
Olfml3	1.55921e-52	0.660102	0.382	0.312	2.90388e-48
Igfbp4	6.77674e-50	0.43219	0.781	0.784	1.2621e-45
Gxylt2	2.44456e-49	0.500661	0.301	0.217	4.55274e-45
Lhfp	4.73299e-49	0.47721	0.476	0.424	8.81471e-45
Dpep1	8.45363e-48	0.318612	0.77	0.745	1.5744e-43
Ergic3	2.39077e-47	0.463058	0.619	0.635	4.45258e-43
Adm	3.71641e-46	0.524103	0.217	0.139	6.92144e-42
Prg4	3.39343e-43	0.492977	0.224	0.144	6.31993e-39
Man1a	8.20361e-43	0.399762	0.455	0.386	1.52784e-38
Pdlim2	9.08188e-42	0.461606	0.441	0.38	1.69141e-37
Fmo1	1.92858e-39	0.469198	0.204	0.136	3.59179e-35
Col1a1	2.60342e-39	0.404901	0.765	0.747	4.84861e-35
Selenok	1.18612e-38	0.421494	0.725	0.748	2.20903e-34
Pmepa1	4.00159e-38	0.478443	0.26	0.19	7.45256e-34
Bicc1	1.65678e-36	0.460856	0.492	0.466	3.0856e-32
Fkbp7	5.60621e-36	0.446367	0.618	0.623	1.0441e-31
Ubb	5.81567e-36	0.427673	0.741	0.771	1.08311e-31
Svep1	2.92481e-34	0.49989	0.404	0.363	5.44716e-30
Sfrp2	3.24247e-34	1.16338	0.367	0.308	6.03878e-30
Prdx4	3.65338e-33	0.449465	0.573	0.578	6.80405e-29
Epdr1	4.56218e-33	0.402365	0.225	0.16	8.4966e-29
Rcn3	6.96167e-33	0.314923	0.736	0.727	1.29654e-28
Laptm4a	3.20659e-30	0.255638	0.816	0.84	5.97196e-26
Klf9	5.93872e-30	0.370952	0.595	0.598	1.10603e-25
Ace	6.11557e-30	0.282662	0.452	0.382	1.13896e-25
C1qtnf2	1.0469e-29	0.433565	0.214	0.153	1.94976e-25
Pmp22	1.32269e-29	0.444908	0.559	0.576	2.46338e-25
Sod3	1.73804e-29	0.473126	0.455	0.439	3.23693e-25
C1s1	2.36146e-29	0.331166	0.633	0.636	4.39798e-25
Ddost	5.22477e-29	0.41591	0.617	0.659	9.7306e-25
Ggh	7.54001e-29	0.454858	0.43	0.407	1.40425e-24
Ctsl	1.11405e-28	0.264891	0.755	0.757	2.0748e-24
Abca8a	1.42538e-26	0.398156	0.477	0.437	2.65463e-22
Cp	1.70075e-26	0.428299	0.522	0.494	3.16748e-22
Nmb	1.85926e-26	0.42379	0.216	0.159	3.46269e-22
Nucb2	1.87111e-26	0.45288	0.38	0.347	3.48475e-22
Ctsz	2.03175e-26	0.366903	0.654	0.68	3.78393e-22
Emp1	2.19631e-25	0.476119	0.488	0.471	4.0904e-21
Fkbp9	3.0599e-24	0.369998	0.609	0.656	5.69875e-20
Fuca1	1.81291e-23	0.40114	0.52	0.534	3.37636e-19
Arhgap20	3.56763e-23	0.352312	0.226	0.172	6.64435e-19
Dnajc3	1.25878e-22	0.416595	0.49	0.503	2.34435e-18
Dusp1	2.67341e-22	0.408858	0.553	0.538	4.97897e-18
Cav1	7.15152e-22	0.412112	0.345	0.303	1.3319e-17
Serpinh1	8.10578e-22	0.239748	0.86	0.859	1.50962e-17
Prrx1	1.3458e-21	0.354355	0.547	0.562	2.50642e-17
Lamp1	2.48555e-21	0.261088	0.711	0.77	4.62909e-17
Il6st	3.41481e-21	0.440705	0.402	0.388	6.35974e-17
Msx1	4.0549e-21	0.417033	0.232	0.185	7.55185e-17
Gstm2	2.21091e-20	0.413946	0.485	0.485	4.1176e-16
Ndrg2	2.23059e-20	0.451642	0.246	0.205	4.15426e-16
Ccdc80	9.9972e-20	0.372695	0.688	0.744	1.86188e-15
Tmeff2	1.19208e-19	0.388824	0.44	0.424	2.22012e-15
Ghr	1.78451e-19	0.374303	0.23	0.187	3.32347e-15
Gm26802	1.8903e-19	0.427153	0.275	0.233	3.5205e-15
Tmed3	3.93239e-18	0.282471	0.707	0.745	7.32369e-14
Smpdl3a	1.16586e-17	0.368954	0.351	0.322	2.17129e-13
Rnf130	1.52116e-17	0.37049	0.257	0.218	2.833e-13
C4b	4.38055e-17	0.528573	0.322	0.291	8.15833e-13
Rap2a	6.00258e-17	0.346503	0.201	0.16	1.11792e-12
Vkorc1	1.81344e-16	0.36616	0.611	0.661	3.37735e-12
Nenf	1.84179e-16	0.265563	0.7	0.771	3.43015e-12
Camk2n1	7.49427e-16	0.305073	0.231	0.187	1.39573e-11
Scn7a	1.27617e-15	0.386222	0.311	0.284	2.37673e-11
Arl4a	1.28995e-15	0.404031	0.393	0.378	2.40241e-11
Crip1	1.59434e-15	0.214993	0.648	0.625	2.96929e-11
Emp2	2.08867e-15	0.337203	0.214	0.175	3.88993e-11
Sparc	2.10255e-15	0.265418	0.812	0.845	3.91579e-11
Irf2bpl	3.52534e-15	0.338857	0.212	0.175	6.5656e-11
Serpina3n	4.60829e-15	0.286866	0.218	0.176	8.58248e-11
Ar	5.5836e-15	0.355263	0.392	0.372	1.03989e-10
Aldh1a1	7.96518e-15	0.372906	0.255	0.219	1.48344e-10
Slit3	1.05419e-14	0.365451	0.329	0.306	1.96333e-10
Ndn	1.57308e-14	0.36589	0.49	0.516	2.92971e-10
Phlda1	2.20565e-14	0.396633	0.505	0.503	4.1078e-10
Wnt5a	1.2283e-13	0.324818	0.241	0.206	2.28758e-09
Jund	1.24039e-13	0.26646	0.671	0.693	2.3101e-09
Sulf2	1.24994e-13	0.323228	0.224	0.191	2.32788e-09
Myl12b	1.80404e-13	0.431635	0.449	0.468	3.35984e-09
Man2a1	1.63847e-12	0.366848	0.339	0.328	3.05149e-08
Nr4a1	3.04603e-12	0.399609	0.23	0.196	5.67293e-08
Ntrk2	3.38416e-12	0.362928	0.337	0.321	6.30265e-08
Hexa	7.02265e-12	0.284202	0.577	0.607	1.3079e-07
Sdf4	1.19955e-11	0.318278	0.562	0.618	2.23404e-07
Tm7sf3	1.64454e-11	0.323245	0.239	0.211	3.06278e-07
Gpx8	1.65156e-11	0.330167	0.615	0.654	3.07587e-07
Adamts2	1.94933e-11	0.292523	0.507	0.53	3.63043e-07
Copz2	3.01951e-11	0.392595	0.536	0.573	5.62353e-07
Cxcl13	3.1868e-10	0.749162	0.214	0.289	5.93509e-06
Gm2a	3.89211e-10	0.326761	0.234	0.21	7.24866e-06
Ces2g	1.2503e-09	0.376004	0.215	0.192	2.32856e-05
Mfap2	1.37631e-09	0.270717	0.482	0.492	2.56325e-05
Slc29a1	1.59556e-09	0.321538	0.426	0.434	2.97156e-05
Lrpap1	2.32314e-09	0.389814	0.409	0.436	4.32661e-05
Sptbn1	7.06147e-09	0.324643	0.597	0.653	0.000131513
Smim14	8.21166e-09	0.281213	0.591	0.648	0.000152934
Prelp	1.13377e-08	0.275817	0.455	0.459	0.000211154
Ppic	1.74735e-07	0.308708	0.611	0.678	0.00325427
Rabac1	3.10684e-07	0.214632	0.664	0.729	0.00578618
Icam1	3.66365e-07	0.250696	0.262	0.24	0.00682319
Add3	3.92636e-07	0.277578	0.407	0.427	0.00731245
Rbp4	8.0435e-07	0.394415	0.255	0.238	0.0149802
Mmp23	1.31412e-06	0.371725	0.481	0.516	0.0244742
Ogn	2.19311e-06	0.31134	0.606	0.649	0.0408445
Myl9	3.13983e-06	0.270967	0.206	0.185	0.0584762
Junb	3.9751e-06	0.226418	0.573	0.574	0.0740322
Arl3	5.47449e-06	0.21608	0.319	0.413	0.101957
Ddrgk1	1.07729e-05	0.208978	0.31	0.4	0.200635
Nrip1	1.42712e-05	0.353201	0.285	0.289	0.265787
Map1lc3a	1.60267e-05	0.262875	0.532	0.586	0.298482
Cyb5r3	1.808e-05	0.20979	0.325	0.42	0.336722
Twsg1	2.50659e-05	0.256674	0.237	0.225	0.466827
App	3.64283e-05	0.24856	0.567	0.628	0.678441
Sec11c	3.88483e-05	0.214851	0.218	0.279	0.723511
Pde6d	6.54838e-05	0.206152	0.217	0.276	1
Spcs2	6.58254e-05	0.211616	0.416	0.53	1
Fzd4	7.28441e-05	0.344727	0.228	0.227	1
Gstm5	0.000117071	0.37849	0.386	0.425	1
Tprgl	0.000126576	0.339391	0.395	0.432	1
Pttg1	0.000139157	0.230095	0.258	0.327	1
Iscu	0.000148194	0.22727	0.374	0.479	1
Tmed10	0.000162823	0.256011	0.626	0.698	1
Tsc22d3	0.00017728	0.523886	0.275	0.282	1
1810058I24Rik	0.000189581	0.212084	0.402	0.509	1
Ctsf	0.000192925	0.273443	0.231	0.224	1
Bmyc	0.000212746	0.214343	0.161	0.202	1
Fam198b	0.000332848	0.281826	0.29	0.292	1
Mbnl1	0.000414591	0.353781	0.377	0.418	1
Prrx2	0.000433194	0.268187	0.212	0.203	1
Gja1	0.000523775	0.308036	0.243	0.241	1
Herpud1	0.000751227	0.348236	0.29	0.299	1
Calm2	0.00108543	0.242946	0.593	0.651	1
Dpm3	0.00124577	0.202165	0.389	0.474	1
Atp6ap2	0.00131366	0.317318	0.24	0.244	1
Cdk2ap2	0.00202086	0.216915	0.358	0.454	1
Csrp2	0.00207608	0.207883	0.43	0.467	1
2022-03-02	0.00221078	0.304558	0.343	0.368	1
Aga	0.00260277	0.212882	0.257	0.314	1
Tshz2	0.00292123	0.270152	0.457	0.51	1
Foxp1	0.00330612	0.243163	0.258	0.259	1
Pam	0.00365903	0.331486	0.335	0.348	1
Mpv17	0.00368787	0.208197	0.223	0.271	1
Cetn3	0.00400649	0.259537	0.346	0.432	1
Tm2d2	0.00481016	0.229072	0.382	0.481	1
Lysmd2	0.00499361	0.271978	0.331	0.352	1
Dstn	0.00531153	0.288061	0.456	0.513	1
1810037I17Rik	0.00859253	0.228917	0.422	0.514	1
Capg	0.0102148	0.254367	0.49	0.54	1
Zfyve21	0.0116315	0.230705	0.282	0.345	1
Mgst3	0.0120503	0.356189	0.216	0.222	1
Gem	0.0129535	0.229275	0.322	0.329	1
Pros1	0.0132963	0.283043	0.294	0.31	1
Klf13	0.0142535	0.206219	0.31	0.378	1
Pdgfra	0.0154842	0.237127	0.518	0.567	1
Angptl1	0.0228195	0.259231	0.327	0.343	1
Pik3r1	0.0228882	0.30057	0.313	0.338	1
Errfi1	0.0238146	0.250206	0.353	0.377	1
Ccl8	0.025297	0.279655	0.226	0.224	1
Man1a2	0.0287279	0.229583	0.221	0.267	1
Adh1	0.0524888	0.22899	0.18	0.21	1
Mxra7	0.0536088	0.215015	0.341	0.409	1
H1f0	0.0586718	0.290839	0.403	0.443	1
Slc48a1	0.0612671	0.204414	0.185	0.216	1
Fbln5	0.0635485	0.315798	0.364	0.399	1
Prr13	0.0637995	0.247121	0.377	0.453	1
Map1lc3b	0.066697	0.222309	0.61	0.702	1
Phlda3	0.0691675	0.391344	0.226	0.276	1
4930523C07Rik	0.077821	0.252384	0.274	0.29	1
Smc6	0.131667	0.229052	0.409	0.5	1
Eif4a2	0.140809	0.21801	0.438	0.519	1
Dctn6	0.142182	0.202221	0.188	0.217	1
Rbms3	0.161071	0.246344	0.249	0.261	1
Tmem256	0.186092	0.276218	0.448	0.509	1
Lox	0.191503	0.206801	0.194	0.219	1
Sri	0.205196	0.295834	0.541	0.63	1
Dapk1	0.210118	0.217696	0.304	0.356	1
Spop	0.235841	0.239672	0.322	0.383	1
Ginm1	0.240284	0.256992	0.335	0.403	1
Tgfbr3	0.240386	0.287711	0.376	0.432	1
Arhgap24	0.252922	0.272073	0.214	0.227	1
Nfix	0.257385	0.22183	0.499	0.592	1
Med28	0.273925	0.285662	0.42	0.514	1
Pls3	0.282866	0.26139	0.205	0.217	1
Klf7	0.286448	0.238133	0.246	0.28	1
Fam46a	0.312717	0.277823	0.444	0.513	1
Rora	0.338125	0.247424	0.29	0.317	1
Atraid	0.352824	0.204086	0.512	0.614	1
Maged2	0.363117	0.229513	0.359	0.42	1
Tm4sf1	0.370279	0.303719	0.199	0.207	1
Ppp1r15a	0.411851	0.234691	0.413	0.461	1
Hcfc1r1	0.430431	0.219828	0.44	0.522	1
Arl6ip5	0.433555	0.279828	0.431	0.495	1
Reep3	0.454307	0.235015	0.32	0.375	1
Sec62	0.53796	0.22863	0.528	0.607	1
Atp6v1g1	0.552701	0.266306	0.513	0.594	1
Tmem50a	0.555397	0.201018	0.508	0.6	1
Thbd	0.594474	0.292193	0.186	0.205	1
Zfp36l2	0.606374	0.29082	0.361	0.407	1
Ccser2	0.611031	0.250615	0.238	0.27	1
Fosb	0.62265	0.211708	0.485	0.543	1
Trim47	0.665455	0.295959	0.254	0.284	1
Ctsk	0.704461	0.224412	0.446	0.503	1
Lrp6	0.719393	0.234425	0.242	0.275	1
Cirbp	0.73491	0.25005	0.213	0.23	1
Scpep1	0.787759	0.245072	0.309	0.352	1
C1ra	0.84648	0.200148	0.421	0.476	1
Atp6v0e	0.863848	0.230415	0.569	0.66	1
Ndufa1	0.963288	0.247752	0.455	0.539	1
Ski	0.98488	0.214481	0.235	0.259	1

## Sheet: Late Diff
	p_val	avg_logFC	pct.1	pct.2	p_val_adj
Cfd	0	5.09929	0.719	0.071	0
Hp	0	3.8085	0.743	0.109	0
Thrsp	0	3.4142	0.858	0.098	0
Retn	0	3.21692	0.5	0.056	0
Fasn	0	3.08073	0.745	0.138	0
Chchd10	0	3.0748	0.903	0.126	0
Pck1	0	2.88247	0.792	0.054	0
Fabp4	0	2.84502	0.932	0.165	0
Apoc1	0	2.80966	0.792	0.129	0
Cox8b	0	2.80194	0.771	0.084	0
Lrg1	0	2.65994	0.512	0.028	0
Pnpla2	0	2.64119	0.833	0.158	0
Cdo1	0	2.57393	0.703	0.05	0
Cidec	0	2.57182	0.696	0.051	0
Acsl1	0	2.55009	0.762	0.126	0
Wfdc21	0	2.54661	0.434	0.027	0
Gpd1	0	2.50349	0.788	0.122	0
Dgat2	0	2.31662	0.649	0.077	0
Car3	0	2.30298	0.83	0.119	0
Cyp2e1	0	2.27812	0.396	0.006	0
Adig	0	2.16894	0.649	0.085	0
Orm1	0	1.81014	0.476	0.013	0
Clstn3	0	1.54173	0.392	0.028	0
Acaa1b	0	1.54025	0.377	0.025	0
Adtrp	0	1.24901	0.292	0.011	0
Acvr1c	0	1.15068	0.252	0.008	0
B3galt2	0	1.12247	0.269	0.007	0
Tmem45b	0	1.07629	0.231	0.005	0
Agpat2	1.08845e-303	2.65079	0.835	0.226	2.02714e-299
Cidea	6.29281e-285	2.96662	0.568	0.089	1.17197e-280
Slc36a2	3.43643e-272	1.66991	0.458	0.058	6.40001e-268
Adipoq	1.96133e-267	2.28619	0.667	0.132	3.65279e-263
Slc27a1	1.26751e-259	1.81585	0.488	0.071	2.3606e-255
Ucp1	1.62466e-254	3.03982	0.564	0.096	3.02577e-250
Acacb	1.5458e-253	1.15425	0.25	0.017	2.8789e-249
Lipe	1.56e-250	1.87405	0.601	0.114	2.90535e-246
Dbi	3.23599e-249	2.65429	0.943	0.467	6.0267e-245
Cd1d1	3.22743e-248	1.60541	0.453	0.062	6.01077e-244
Plin1	2.37233e-244	1.57937	0.559	0.097	4.41822e-240
Acadm	5.87715e-241	2.44794	0.875	0.322	1.09456e-236
Net1	1.45811e-225	1.14575	0.3	0.029	2.71559e-221
Scd1	1.44919e-223	4.35213	0.821	0.315	2.69897e-219
Pdk4	8.43178e-218	1.72771	0.432	0.063	1.57033e-213
Chpt1	2.50205e-217	2.39481	0.776	0.273	4.65982e-213
mt-Co1	4.37357e-213	3.44565	0.5	0.089	8.14533e-209
Ces1d	3.37203e-211	1.91847	0.63	0.149	6.28008e-207
Echdc1	7.24313e-205	1.58047	0.45	0.074	1.34896e-200
Ephx2	1.76575e-189	1.92303	0.604	0.154	3.28853e-185
Cd36	9.67132e-185	1.85298	0.616	0.159	1.80119e-180
Sod2	4.51747e-184	2.03801	0.842	0.377	8.41334e-180
Mpc1	1.3265e-181	2.25542	0.87	0.514	2.47047e-177
Prkar2b	2.86381e-181	1.82868	0.689	0.214	5.33355e-177
Atp5b	4.47006e-177	1.94338	0.927	0.564	8.32504e-173
Aldh1l1	9.67941e-177	1.11923	0.276	0.031	1.80269e-172
Acadl	2.58677e-175	2.26225	0.778	0.317	4.8176e-171
Chchd2	8.72657e-175	1.56523	0.941	0.676	1.62524e-170
Uqcrq	2.11308e-173	2.09079	0.87	0.474	3.93539e-169
Pcx	1.8017e-168	1.49648	0.415	0.075	3.35548e-164
Mmd	6.006e-168	1.74862	0.538	0.131	1.11856e-163
Cox4i1	7.56092e-165	1.9401	0.91	0.644	1.40814e-160
Fam213a	2.35657e-163	1.41153	0.436	0.083	4.38888e-159
Tkt	1.09156e-160	2.07322	0.8	0.387	2.03292e-156
Fcor	3.10979e-159	1.28771	0.347	0.054	5.79168e-155
Hadhb	3.60745e-159	2.10679	0.759	0.301	6.71852e-155
Mpc2	4.47089e-159	1.97685	0.87	0.554	8.32658e-155
Me1	6.74805e-159	1.95774	0.505	0.12	1.25676e-154
Cox5a	1.00274e-155	1.86237	0.828	0.391	1.8675e-151
Eci1	1.74908e-152	1.87224	0.717	0.284	3.25748e-148
Cib2	2.68175e-150	1.45834	0.387	0.07	4.9945e-146
Lcn2	1.48646e-149	1.83723	0.292	0.04	2.76838e-145
Scp2	1.84543e-147	1.68977	0.847	0.523	3.43693e-143
Mgll	6.4819e-145	1.70302	0.649	0.223	1.20719e-140
Cox8a	3.28547e-144	1.60464	0.894	0.632	6.11885e-140
Elovl3	4.33988e-143	1.53163	0.203	0.02	8.0826e-139
Aldh6a1	4.51678e-143	1.43342	0.434	0.094	8.41206e-139
Aco2	3.84636e-140	1.96197	0.703	0.284	7.16345e-136
Ifi27	1.58907e-139	1.84529	0.882	0.562	2.95949e-135
Uqcr10	4.15248e-139	1.73578	0.854	0.519	7.73358e-135
Ldha	3.71334e-138	1.60674	0.87	0.57	6.91573e-134
Acaca	4.92877e-138	1.4568	0.382	0.074	9.17934e-134
Mrap	1.51e-135	1.51429	0.512	0.137	2.81222e-131
Acadvl	1.6944e-134	1.93301	0.715	0.3	3.15565e-130
Cox7a1	9.65275e-132	1.98744	0.476	0.12	1.79773e-127
Uqcr11	3.31428e-131	1.73895	0.842	0.512	6.17252e-127
Pfkfb3	1.24533e-130	0.990348	0.255	0.035	2.31931e-126
Pank1	3.5001e-130	1.15862	0.238	0.03	6.51859e-126
Atp1a2	1.78285e-129	1.54462	0.606	0.208	3.32039e-125
Ppp2r5a	3.64512e-129	1.6453	0.599	0.212	6.78867e-125
Slc16a1	3.39475e-127	1.32142	0.375	0.077	6.32238e-123
Cox6c	1.77886e-125	1.61406	0.882	0.656	3.31294e-121
Tst	1.8783e-125	1.61126	0.467	0.123	3.49814e-121
Acp5	4.84712e-125	1.62154	0.505	0.147	9.02728e-121
Adipor2	8.17509e-125	1.4338	0.502	0.145	1.52253e-120
Acox1	4.45712e-123	1.59001	0.502	0.148	8.30094e-119
Cat	2.15345e-122	1.82083	0.642	0.267	4.01059e-118
mt-Nd5	3.10583e-121	2.12802	0.469	0.122	5.78431e-117
Cox6b1	1.55349e-119	1.58284	0.854	0.581	2.89323e-115
Sncg	1.82948e-119	1.73031	0.271	0.043	3.40722e-115
Ndufa4	2.87701e-116	1.49857	0.877	0.628	5.35814e-112
Rasd1	6.30349e-116	0.977317	0.222	0.029	1.17396e-111
Plin4	2.1893e-114	1.19732	0.394	0.092	4.07735e-110
Crat	2.67586e-114	1.40231	0.41	0.101	4.98352e-110
Gstz1	1.94433e-111	1.33426	0.408	0.103	3.62112e-107
Sdha	2.12127e-111	1.6342	0.719	0.383	3.95066e-107
Ndufb9	2.95908e-110	1.57508	0.818	0.564	5.51098e-106
Aifm2	2.49661e-108	1.15154	0.382	0.09	4.64969e-104
Gk	3.02864e-108	1.17498	0.238	0.036	5.64055e-104
Ndufab1	2.08058e-107	1.5605	0.79	0.463	3.87487e-103
Nudt7	9.94618e-105	1.12404	0.281	0.051	1.85238e-100
Uqcrfs1	1.31045e-104	1.7677	0.776	0.441	2.44059e-100
Taldo1	4.66132e-103	1.65224	0.703	0.38	8.68124e-99
Atp5j2	6.19342e-102	1.42617	0.847	0.591	1.15346e-97
Etfb	1.18183e-101	1.66434	0.795	0.508	2.20105e-97
Decr1	5.34175e-101	1.67541	0.604	0.245	9.94847e-97
Atp5a1	6.98731e-101	1.50875	0.816	0.529	1.30132e-96
Dgat1	1.45092e-100	1.39418	0.432	0.124	2.70219e-96
Slc25a1	1.68509e-100	1.50232	0.403	0.108	3.13831e-96
Pde3b	2.78721e-99	1.0651	0.311	0.066	5.1909e-95
Cox7c	2.79936e-99	1.36187	0.851	0.609	5.21352e-95
Apmap	2.92445e-99	1.37292	0.422	0.119	5.4465e-95
Ppa1	1.06022e-97	1.6537	0.653	0.338	1.97455e-93
Oplah	3.4572e-97	1.00017	0.267	0.049	6.43869e-93
4931406C07Rik	1.16438e-96	1.36414	0.434	0.129	2.16854e-92
Cebpa	2.17686e-96	1.32062	0.535	0.196	4.05418e-92
Glul	3.59638e-95	1.87237	0.705	0.444	6.69789e-91
Cyc1	1.96317e-94	1.50602	0.733	0.398	3.65621e-90
Ltc4s	6.55049e-94	1.0249	0.297	0.061	1.21996e-89
Cox6a1	1.41122e-93	1.45435	0.821	0.641	2.62826e-89
Mcrip2	1.01561e-92	1.31109	0.528	0.187	1.89147e-88
Kcnk3	1.79685e-92	0.950237	0.217	0.034	3.34645e-88
mt-Nd4l	1.7122e-89	1.63786	0.524	0.197	3.18881e-85
Cox7a2	4.35209e-89	1.45748	0.79	0.56	8.10533e-85
Hadha	9.34553e-89	1.69332	0.599	0.278	1.74051e-84
Idh3a	1.95289e-88	1.56923	0.599	0.248	3.63706e-84
Cdkn2c	1.61659e-85	1.26782	0.42	0.132	3.01074e-81
Ppp1r1a	2.03496e-85	1.16528	0.33	0.081	3.78991e-81
1110008P14Rik	5.85108e-83	1.49355	0.559	0.253	1.08971e-78
Atp5l	7.68729e-83	1.25658	0.83	0.632	1.43168e-78
Hspa9	1.47724e-82	1.52877	0.656	0.348	2.75122e-78
Ech1	6.31835e-82	1.5687	0.771	0.548	1.17673e-77
Coq8a	1.66633e-81	1.14889	0.245	0.048	3.10337e-77
Sorbs1	6.86995e-81	0.875696	0.245	0.048	1.27946e-76
Ghitm	2.39688e-79	1.56511	0.686	0.431	4.46394e-75
Echs1	4.24808e-79	1.50581	0.634	0.338	7.91162e-75
Dnajc15	6.60594e-78	1.42503	0.573	0.278	1.23029e-73
Aldoa	9.51922e-78	1.34682	0.837	0.641	1.77286e-73
Gpx4	1.78761e-77	1.28347	0.837	0.717	3.32924e-73
Ndufa6	2.62764e-77	1.39584	0.769	0.562	4.89371e-73
Ifi27l2a	4.13938e-75	1.7384	0.795	0.585	7.70918e-71
Acaa2	1.47229e-74	1.78243	0.7	0.436	2.742e-70
Ghr	8.82347e-74	1.45326	0.469	0.188	1.64328e-69
Fabp5	1.63039e-73	0.78541	0.467	0.15	3.03644e-69
Cox5b	3.65129e-73	1.34339	0.738	0.526	6.80016e-69
Uqcrc1	9.00266e-73	1.5365	0.71	0.444	1.67666e-68
Sucla2	7.87646e-72	1.70026	0.542	0.26	1.46691e-67
Sdhb	1.19512e-71	1.40037	0.745	0.513	2.22579e-67
Hadh	4.4937e-71	1.52792	0.637	0.359	8.36906e-67
Rgs2	2.94491e-70	0.958207	0.245	0.053	5.48461e-66
Fabp3	3.01592e-70	1.95911	0.236	0.051	5.61685e-66
Etfa	3.6583e-70	1.6183	0.722	0.5	6.81321e-66
Gpd2	4.85774e-70	1.29727	0.281	0.07	9.04705e-66
Hsd17b12	9.08165e-70	1.47201	0.512	0.235	1.69137e-65
Cpt2	3.78126e-69	1.3347	0.417	0.151	7.04221e-65
Mtch2	1.14234e-68	1.35615	0.684	0.452	2.1275e-64
Atp5h	4.09059e-67	1.27093	0.802	0.614	7.61831e-63
Cox7b	6.53858e-67	1.41035	0.733	0.517	1.21774e-62
Atp5d	7.21487e-67	1.28053	0.771	0.572	1.3437e-62
Atp5o.1	1.34911e-66	1.19935	0.757	0.524	2.51259e-62
Lpl	5.39303e-66	0.780622	0.884	0.652	1.0044e-61
Nnmt	1.93741e-65	1.48854	0.658	0.469	3.60823e-61
Acat2	4.03781e-65	0.985018	0.269	0.068	7.52003e-61
Bckdha	1.96651e-64	1.22268	0.446	0.178	3.66243e-60
Ndufs2	3.8914e-64	1.41828	0.663	0.428	7.24735e-60
Mdh2	1.31098e-63	1.19523	0.717	0.479	2.44157e-59
Tspo	1.42399e-63	1.18121	0.764	0.684	2.65204e-59
Cycs	1.72352e-63	1.60661	0.59	0.31	3.20988e-59
Arxes2	4.85283e-63	1.18971	0.387	0.136	9.03792e-59
Idh3g	1.28475e-61	1.50883	0.594	0.337	2.39272e-57
S100a1	6.67729e-61	1.30865	0.672	0.455	1.24358e-56
Mdh1	2.53251e-60	1.35167	0.675	0.439	4.71655e-56
Hmgcs1	7.9698e-60	1.14649	0.448	0.184	1.4843e-55
Cluh	8.854e-60	1.065	0.349	0.116	1.64897e-55
Tmem120a	7.02932e-59	1.2163	0.458	0.199	1.30914e-54
Gbe1	7.91352e-59	0.994306	0.241	0.06	1.47381e-54
Hibch	1.25575e-58	1.12066	0.328	0.107	2.33872e-54
Retsat	3.82435e-58	1.21829	0.443	0.19	7.12247e-54
Uqcrb	2.29893e-57	1.31676	0.75	0.577	4.28153e-53
Pla2g16	2.4881e-57	1.3586	0.611	0.393	4.63384e-53
Clu	3.35413e-57	1.41888	0.236	0.059	6.24673e-53
Gm45716	5.4521e-56	0.760661	0.236	0.059	1.0154e-51
mt-Nd4	5.99105e-56	1.90343	0.229	0.055	1.11577e-51
Atp5k	8.83181e-55	1.42214	0.59	0.349	1.64484e-50
Ctsd	2.01461e-54	1.30565	0.691	0.581	3.75201e-50
Ndufa12	2.04194e-54	1.26972	0.665	0.459	3.80291e-50
Nabp1	3.75373e-54	0.876693	0.229	0.057	6.99094e-50
Ndufs7	5.46827e-54	1.45851	0.7	0.507	1.01841e-49
Dlat	1.87673e-53	1.2735	0.406	0.171	3.49522e-49
Uqcrc2	2.84179e-53	1.41154	0.62	0.378	5.29255e-49
Elovl6	4.05377e-53	1.2884	0.283	0.088	7.54975e-49
Plin2	1.04951e-52	1.35521	0.682	0.464	1.95461e-48
Ndufb8	1.86036e-52	1.29416	0.679	0.512	3.46473e-48
Fam126b	8.85372e-52	0.73741	0.229	0.059	1.64892e-47
Ndufb6	4.72124e-50	1.22975	0.679	0.49	8.79283e-46
Hint2	6.2209e-50	1.21391	0.495	0.264	1.15858e-45
Ndufc1	1.11319e-49	1.29558	0.672	0.516	2.07321e-45
Mgst1	2.63546e-49	1.16181	0.788	0.808	4.90828e-45
Letm1	6.11131e-49	1.25055	0.394	0.168	1.13817e-44
Pdhb	3.76662e-48	1.42008	0.493	0.263	7.01495e-44
Bscl2	4.20028e-48	1.13808	0.505	0.287	7.82261e-44
Ak2	1.65332e-47	1.16684	0.517	0.289	3.07915e-43
Suclg1	2.06544e-47	1.72155	0.592	0.377	3.84667e-43
Coq9	7.44375e-47	1.28236	0.399	0.175	1.38632e-42
Ndufv1	1.45659e-46	1.21491	0.566	0.346	2.71276e-42
Prdx3	4.64679e-46	1.22736	0.528	0.315	8.65418e-42
Ndufv3	1.87172e-45	1.24104	0.679	0.559	3.48589e-41
Insig1	3.89919e-45	0.997265	0.335	0.13	7.26186e-41
Ndufs5	1.20078e-43	1.12529	0.684	0.546	2.23634e-39
Hibadh	5.64149e-43	1.20841	0.521	0.316	1.05067e-38
Abcd3	8.64878e-43	1.08358	0.361	0.154	1.61075e-38
Acly	8.95452e-43	1.64967	0.462	0.254	1.66769e-38
Ptp4a1	2.77791e-42	1.18715	0.519	0.32	5.17358e-38
Cyb5b	4.41774e-42	1.10026	0.436	0.228	8.22759e-38
Uqcrh	8.24847e-42	1.0722	0.769	0.651	1.5362e-37
Acads	8.58137e-42	1.25191	0.427	0.213	1.59819e-37
Ndufs6	2.17193e-41	1.16858	0.644	0.487	4.04501e-37
Pdha1	2.54367e-41	1.23904	0.517	0.313	4.73734e-37
Ndufa2	3.313e-41	1.06544	0.733	0.651	6.17014e-37
Cs	4.23716e-41	1.17357	0.474	0.265	7.89129e-37
Gyg	1.58231e-39	0.873173	0.335	0.139	2.9469e-35
Ndufb5	4.08723e-38	1.02717	0.689	0.576	7.61205e-34
Ndufb3	7.35436e-38	1.12179	0.611	0.459	1.36968e-33
Ogdh	5.11109e-36	1.21569	0.432	0.239	9.5189e-32
Ndufa10	1.38859e-35	1.15112	0.547	0.373	2.58611e-31
Bcat2	4.48892e-35	1.04155	0.351	0.169	8.36016e-31
Immt	4.95981e-35	1.06761	0.481	0.281	9.23715e-31
Hacd2	5.67788e-35	1.10354	0.425	0.243	1.05745e-30
Pank3	2.98329e-34	0.957801	0.314	0.136	5.55608e-30
Atp5e	5.21697e-34	1.14443	0.71	0.658	9.71608e-30
Tusc5	6.30264e-34	0.885876	0.269	0.104	1.1738e-29
Idh3b	7.65906e-34	1.24165	0.505	0.318	1.42642e-29
Ndufs3	9.0303e-34	1.15481	0.616	0.464	1.6818e-29
Pnpla8	3.69181e-33	1.01267	0.474	0.291	6.87562e-29
Hspd1	5.00628e-33	0.723332	0.592	0.377	9.32369e-29
Pex16	9.65605e-32	0.880243	0.304	0.134	1.79834e-27
Ndufc2	1.05697e-31	0.903137	0.653	0.545	1.9685e-27
1700037H04Rik	1.08521e-31	1.04822	0.285	0.122	2.0211e-27
Lpin1	1.72756e-31	0.871179	0.269	0.109	3.21741e-27
Sephs2	2.39334e-31	0.943398	0.283	0.119	4.45737e-27
Pccb	7.29822e-31	0.822903	0.245	0.093	1.35922e-26
Ndufv2	1.89962e-30	1.15298	0.608	0.475	3.53786e-26
Ndufb7	2.15188e-30	1.10609	0.623	0.504	4.00765e-26
Minos1	4.3697e-30	0.979968	0.679	0.594	8.13813e-26
Ndufb11	1.04161e-29	1.0244	0.67	0.6	1.9399e-25
Dld	1.16502e-29	1.12102	0.403	0.226	2.16974e-25
mt-Nd6	1.29891e-29	0.886985	0.219	0.078	2.4191e-25
Coasy	1.56389e-29	0.84204	0.255	0.104	2.9126e-25
Atp5g3	1.59484e-29	1.0144	0.599	0.525	2.97023e-25
Bnip3	3.59263e-29	0.800928	0.307	0.141	6.69092e-25
Sod1	5.52005e-29	1.12308	0.528	0.403	1.02805e-24
Mknk2	1.05421e-28	0.890579	0.344	0.175	1.96335e-24
Cisd1	1.17052e-28	1.00114	0.488	0.314	2.17998e-24
Apoe	1.39259e-28	0.529989	0.684	0.43	2.59356e-24
Elovl5	1.43129e-28	0.842104	0.288	0.128	2.66563e-24
Alas1	3.0521e-28	1.0919	0.351	0.187	5.68423e-24
Ndufs8	1.99443e-27	1.2018	0.514	0.365	3.71443e-23
Uck1	3.3941e-27	0.917524	0.328	0.166	6.32118e-23
Atp5c1	1.0283e-26	0.811933	0.703	0.615	1.91511e-22
Ldhb	1.56798e-26	1.26127	0.427	0.262	2.9202e-22
Usmg5	1.67087e-26	1.11021	0.58	0.477	3.11182e-22
Hist1h1c	2.44301e-26	0.990452	0.351	0.183	4.54986e-22
2010107E04Rik	5.51905e-26	1.00876	0.634	0.512	1.02787e-21
mt-Atp8	5.67168e-26	0.937825	0.262	0.114	1.05629e-21
Mccc1	7.08195e-26	0.671159	0.21	0.08	1.31894e-21
Adhfe1	7.22238e-26	0.835281	0.21	0.08	1.3451e-21
Mt1	8.11058e-26	0.652444	0.729	0.624	1.51051e-21
Ddhd2	1.11802e-25	0.85424	0.25	0.107	2.0822e-21
Slc25a20	5.31387e-25	0.88937	0.231	0.095	9.89654e-21
Mut	1.0611e-24	0.780153	0.271	0.125	1.9762e-20
Dbt	1.26633e-24	0.802832	0.238	0.102	2.35841e-20
Slc25a10	2.96837e-24	0.749995	0.255	0.115	5.52829e-20
Pmvk	1.18641e-23	0.849051	0.241	0.106	2.20957e-19
Ndufa13	1.61356e-23	0.859823	0.703	0.704	3.0051e-19
Rgcc	2.6883e-23	0.574461	0.333	0.157	5.00669e-19
Ndufb10	3.7603e-23	0.870741	0.658	0.573	7.00319e-19
Cebpb	4.00917e-23	0.908255	0.66	0.567	7.46668e-19
Agpat3	7.46877e-23	0.908094	0.399	0.256	1.39098e-18
Mettl7a1	1.19818e-22	0.705206	0.243	0.108	2.23149e-18
Sh3pxd2a	1.85108e-22	0.815305	0.354	0.203	3.44745e-18
Emc6	2.75575e-22	0.916709	0.434	0.297	5.1323e-18
Fam13a	3.61107e-22	1.01349	0.217	0.092	6.72526e-18
Reep5	1.15414e-21	0.739237	0.667	0.672	2.14947e-17
Ivd	1.59243e-21	0.794863	0.215	0.092	2.96574e-17
Hsdl2	3.03234e-21	0.894368	0.262	0.128	5.64744e-17
Msrb1	3.52455e-21	0.948616	0.458	0.343	6.56412e-17
Ywhag	6.0042e-21	0.866814	0.42	0.284	1.11822e-16
Bola3	1.39465e-20	0.987701	0.514	0.401	2.5974e-16
Cisd3	2.50727e-20	0.999757	0.366	0.222	4.66953e-16
C4b	3.57422e-20	0.877118	0.434	0.293	6.65663e-16
Dhrs7b	4.43593e-20	0.737392	0.295	0.158	8.26148e-16
Hist1h2bc	4.46753e-20	0.832063	0.545	0.451	8.32034e-16
Tmem135	5.50699e-20	0.576343	0.21	0.091	1.02562e-15
Fitm2	8.18879e-20	0.642724	0.229	0.106	1.52508e-15
Mecr	7.54098e-19	0.940683	0.226	0.108	1.40443e-14
Pon3	1.32294e-18	0.680789	0.267	0.138	2.46385e-14
Ndufa3	1.43301e-18	0.938188	0.517	0.437	2.66884e-14
Dlst	1.86542e-18	0.995255	0.321	0.188	3.47415e-14
Gpat4	1.97611e-18	0.870946	0.285	0.155	3.68031e-14
Fam213b	2.01857e-18	0.707346	0.276	0.146	3.75939e-14
Sdhd	2.72966e-18	0.986233	0.533	0.432	5.08372e-14
Crls1	3.1314e-18	0.738014	0.29	0.161	5.83192e-14
2410015M20Rik	3.87086e-18	0.85074	0.59	0.513	7.20909e-14
Trp53inp2	4.2034e-18	0.783781	0.21	0.096	7.82841e-14
Tmed5	5.41702e-18	0.849258	0.469	0.354	1.00887e-13
Fh1	6.24299e-18	0.986577	0.368	0.24	1.16269e-13
Pkm	6.25737e-18	1.26059	0.571	0.522	1.16537e-13
Ncoa4	8.38906e-18	0.818869	0.248	0.126	1.56238e-13
Slc25a51	1.12497e-17	0.943697	0.361	0.238	2.09514e-13
Slc1a5	1.19667e-17	0.91604	0.524	0.49	2.22869e-13
Hint3	1.9081e-17	0.651512	0.243	0.123	3.55365e-13
Srebf1	2.5408e-17	0.764385	0.283	0.161	4.73199e-13
Sdhc	2.64693e-17	1.06415	0.472	0.36	4.92964e-13
Fmo1	2.75204e-17	0.800246	0.267	0.142	5.12541e-13
Slc25a5	3.70254e-17	0.502773	0.627	0.491	6.89562e-13
Phyh	4.03837e-17	1.02958	0.283	0.16	7.52106e-13
Tpi1	6.00384e-17	0.758397	0.566	0.481	1.11816e-12
Eno1	1.76607e-16	1.05249	0.403	0.284	3.28912e-12
Saa3	1.8462e-16	0.915678	0.226	0.107	3.43835e-12
Abhd5	2.08555e-16	0.718964	0.309	0.189	3.88413e-12
Mrpl12	2.25847e-16	0.806234	0.481	0.364	4.20617e-12
Fuom	2.47994e-16	0.798077	0.274	0.153	4.61863e-12
Gm42418	2.767e-16	0.921551	0.585	0.478	5.15326e-12
Fah	2.80951e-16	0.669589	0.212	0.104	5.23244e-12
Etfdh	2.98949e-16	0.992367	0.278	0.16	5.56762e-12
Tgoln1	4.60657e-16	0.877533	0.493	0.423	8.57927e-12
Pepd	7.14416e-16	0.760252	0.241	0.129	1.33053e-11
Tmem238	9.42756e-16	0.758494	0.236	0.124	1.75579e-11
Hsd17b4	1.82352e-15	0.793412	0.29	0.173	3.39613e-11
Ndufa8	1.8367e-15	0.886233	0.573	0.521	3.42068e-11
Ndufa1	4.30092e-15	0.88794	0.559	0.529	8.01002e-11
Ndufa9	8.32559e-15	0.833329	0.406	0.295	1.55056e-10
Arl4a	8.95744e-15	0.774238	0.472	0.379	1.66823e-10
Gm5617	1.95124e-14	0.688752	0.252	0.142	3.634e-10
Pygl	2.54076e-14	0.817092	0.233	0.126	4.7319e-10
Ndufa5	2.70121e-14	0.936691	0.531	0.466	5.03074e-10
Gsto1	2.98399e-14	0.79739	0.33	0.218	5.55739e-10
Ormdl3	3.22097e-14	0.828508	0.356	0.251	5.99874e-10
Atox1	3.88376e-14	0.653843	0.66	0.665	7.23311e-10
Ctsb	4.28959e-14	0.625507	0.712	0.782	7.98893e-10
Ndufa11	1.0382e-13	0.861658	0.571	0.536	1.93354e-09
Lonp1	2.13121e-13	0.915199	0.222	0.124	3.96917e-09
Higd1a	4.32649e-13	0.963673	0.476	0.4	8.05765e-09
Mcur1	4.68423e-13	0.67161	0.29	0.183	8.72391e-09
Mrpl30	4.87093e-13	0.784264	0.542	0.51	9.07162e-09
Tob1	6.25355e-13	0.765403	0.321	0.214	1.16466e-08
Ddt	8.21937e-13	0.867755	0.429	0.341	1.53078e-08
Cox17	1.11083e-12	0.973293	0.292	0.19	2.06882e-08
Apoo	1.18372e-12	0.92561	0.233	0.135	2.20455e-08
Atpaf2	1.39877e-12	0.771162	0.217	0.119	2.60506e-08
Pgd	2.04507e-12	0.789555	0.337	0.24	3.80875e-08
Adcy3	2.37766e-12	0.712225	0.203	0.11	4.42815e-08
Cdc34	4.34792e-12	0.634585	0.259	0.159	8.09757e-08
Pgam1	1.01039e-11	0.941534	0.531	0.482	1.88175e-07
Pex13	2.11882e-11	0.627922	0.264	0.168	3.94608e-07
Pgls	2.5197e-11	0.83087	0.528	0.506	4.6927e-07
Atp5f1	2.96689e-11	0.672663	0.634	0.627	5.52554e-07
Rbp4	3.30249e-11	0.97931	0.333	0.238	6.15055e-07
Mrpl34	3.83236e-11	0.766302	0.403	0.309	7.13738e-07
Hspe1	4.56392e-11	0.523363	0.627	0.589	8.49985e-07
Snx10	9.35281e-11	0.822556	0.323	0.233	1.74187e-06
Romo1	1.41538e-10	0.743911	0.535	0.521	2.63601e-06
D10Jhu81e	1.61024e-10	0.841462	0.33	0.238	2.99891e-06
Aco1	1.62977e-10	0.660254	0.274	0.182	3.03528e-06
Etfrf1	1.94671e-10	0.757988	0.212	0.125	3.62556e-06
Ndufb4	6.3474e-10	0.846685	0.533	0.509	1.18214e-05
Ndufa7	6.97041e-10	0.720537	0.578	0.605	1.29817e-05
Aplp2	2.23336e-09	0.719066	0.521	0.501	4.15941e-05
Tmem205	3.28455e-09	0.729517	0.377	0.32	6.11714e-05
Gnas	3.65822e-09	0.281787	0.601	0.812	6.81308e-05
Ndufb2	4.92147e-09	0.894125	0.441	0.399	9.16574e-05
Lpgat1	8.26093e-09	0.618724	0.262	0.182	0.000153852
Idh1	9.97255e-09	0.687973	0.441	0.412	0.000185729
Gnpat	1.05086e-08	0.646991	0.229	0.151	0.000195712
Eif4ebp1	1.09324e-08	0.63686	0.521	0.516	0.000203606
Pmm1	1.72661e-08	0.759181	0.337	0.268	0.000321564
Zfp703	2.60821e-08	0.58421	0.226	0.15	0.000485754
Acot13	2.76846e-08	0.802566	0.309	0.231	0.000515598
Grina	4.04316e-08	0.680963	0.446	0.42	0.000752998
Mcee	5.70578e-08	0.800555	0.349	0.285	0.00106265
Mrpl38	6.11438e-08	0.599442	0.255	0.182	0.00113874
H2-Q10	8.79158e-08	0.727529	0.205	0.132	0.00163734
Rex1bd	8.87305e-08	0.714871	0.481	0.476	0.00165252
Rnf11	8.94523e-08	0.647198	0.314	0.248	0.00166596
Abca1	9.4707e-08	0.524935	0.297	0.221	0.00176382
Zfand6	1.14297e-07	0.727555	0.41	0.37	0.00212866
Gde1	1.20261e-07	0.737454	0.356	0.306	0.00223974
H2-Ke6	1.20688e-07	0.714468	0.229	0.154	0.0022477
Acat1	1.26524e-07	0.827128	0.486	0.468	0.00235638
Slc1a3	2.25616e-07	0.646701	0.259	0.19	0.00420187
Pparg	2.33731e-07	0.661792	0.304	0.236	0.00435301
Chp1	3.01243e-07	0.633668	0.358	0.308	0.00561035
Gm2a	3.94263e-07	0.523472	0.283	0.212	0.00734276
Prdx1	4.69835e-07	0.583978	0.67	0.719	0.0087502
Hagh	1.07209e-06	0.601677	0.323	0.263	0.0199665
Dhrs4	1.11231e-06	0.816571	0.314	0.256	0.0207156
G3bp2	1.49518e-06	0.613624	0.415	0.387	0.0278462
C1qtnf12	1.54518e-06	0.674173	0.323	0.265	0.0287775
Grpel1	1.70524e-06	0.651375	0.413	0.372	0.0317583
Tbc1d20	1.77824e-06	0.653581	0.229	0.164	0.033118
Coa5	2.12451e-06	0.669545	0.217	0.154	0.0395669
Phlda3	2.66006e-06	0.751844	0.323	0.269	0.0495409
Timm8b	3.7973e-06	0.704066	0.448	0.438	0.0707209
Eif4a2	4.13282e-06	0.246368	0.318	0.512	0.0769696
Slirp	4.30483e-06	0.214735	0.236	0.397	0.0801732
Ndrg2	4.3647e-06	0.727197	0.267	0.209	0.0812882
Eloc	5.32046e-06	0.251441	0.295	0.483	0.0990883
Fdx1	5.34172e-06	0.717374	0.38	0.347	0.0994842
Polr2k	7.19765e-06	0.203862	0.172	0.299	0.134049
Timm44	7.376e-06	0.722667	0.217	0.159	0.137371
Prdx6	1.2334e-05	0.245079	0.384	0.599	0.229709
Dynll2	1.37036e-05	0.644739	0.361	0.327	0.255215
Ppm1a	2.51075e-05	0.544243	0.323	0.279	0.467602
Acadsb	2.54157e-05	0.447002	0.267	0.21	0.473342
Coq7	2.6395e-05	0.681842	0.243	0.185	0.49158
Dnajc19	3.00579e-05	0.253688	0.259	0.414	0.559799
Pgm2	3.24881e-05	0.608335	0.271	0.223	0.605059
Mrps28	3.63673e-05	0.232558	0.222	0.36	0.677305
Tmem242	3.7197e-05	0.202317	0.123	0.224	0.692756
Csad	4.26869e-05	0.629528	0.271	0.224	0.795001
Gpi1	5.32317e-05	0.811232	0.406	0.405	0.991386
Timm13	5.45601e-05	0.576363	0.531	0.565	1
Tmem14c	5.59016e-05	0.663897	0.486	0.486	1
Tufm	6.22169e-05	0.659647	0.25	0.198	1
Mrps36	8.67064e-05	0.865672	0.366	0.34	1
Pmepa1	8.84185e-05	0.518674	0.252	0.197	1
D17Wsu92e	9.41768e-05	0.56336	0.208	0.157	1
Acsl5	9.61499e-05	0.266072	0.123	0.217	1
Ndufs1	9.79015e-05	0.732096	0.215	0.166	1
Zcrb1	0.000100959	0.253832	0.276	0.415	1
Fastk	0.000108837	0.299383	0.118	0.211	1
Commd6	0.000124691	0.209231	0.2	0.326	1
Cript	0.000144813	0.263221	0.177	0.286	1
Mrpl42	0.000148569	0.639631	0.465	0.472	1
Nap1l4	0.000156842	0.221476	0.142	0.237	1
Psme1	0.000169641	0.242462	0.311	0.461	1
1110008F13Rik	0.000179277	0.610346	0.474	0.507	1
Atp6v1g1	0.000181715	0.202053	0.382	0.587	1
G0s2	0.0001834	0.471307	0.436	0.406	1
Adk	0.000188732	0.228055	0.132	0.223	1
Pgk1	0.000193167	0.733086	0.406	0.395	1
Timm17a	0.000200671	0.286484	0.267	0.395	1
Cox20	0.000218184	0.201658	0.21	0.327	1
Sh3glb1	0.000219845	0.609462	0.531	0.594	1
Eif3c	0.000221497	0.219033	0.292	0.456	1
Ahcyl1	0.000248492	0.207179	0.167	0.271	1
Ap3s1	0.000262911	0.55718	0.488	0.524	1
Mrpl58	0.000272445	0.239733	0.193	0.309	1
Fkbp2	0.000277923	0.225482	0.358	0.533	1
Pgrmc2	0.000305163	0.528934	0.215	0.169	1
Cav1	0.000308687	0.535692	0.344	0.308	1
Rtn4	0.000315191	0.62223	0.509	0.569	1
Acyp2	0.000338477	0.783085	0.233	0.193	1
Trf	0.00034537	1.01904	0.217	0.179	1
Cbr1	0.000353648	0.596128	0.29	0.256	1
Ndufaf8	0.000371807	0.250717	0.191	0.299	1
Ak3	0.000377234	0.63448	0.245	0.206	1
Fth1	0.000403219	0.33025	0.816	0.891	1
Samm50	0.00041612	0.71793	0.318	0.295	1
Ube2k	0.000453922	0.287848	0.264	0.405	1
Mgst3	0.000483725	0.495887	0.262	0.22	1
Vdac2	0.000507002	0.293316	0.325	0.465	1
Emc2	0.000520045	0.220758	0.184	0.288	1
Psme2	0.000522926	0.202574	0.354	0.525	1
Canx	0.000542568	0.209356	0.401	0.586	1
Atp6v0b	0.000772844	0.202349	0.337	0.505	1
Ppp2r2a	0.000821836	0.215615	0.156	0.248	1
Nadk	0.00125017	0.52505	0.29	0.259	1
Timm22	0.00149237	0.213784	0.134	0.215	1
Tecr	0.00171546	0.555449	0.474	0.526	1
Picalm	0.00174208	0.622146	0.295	0.275	1
Endog	0.00189006	0.596498	0.236	0.201	1
Sgta	0.00206948	0.236979	0.229	0.339	1
Pmpcb	0.0021743	0.614513	0.226	0.191	1
Psma1	0.00245532	0.30154	0.302	0.433	1
Dctn3	0.00270181	0.231782	0.304	0.445	1
Mrpl51	0.00272571	0.650818	0.434	0.457	1
Zwint	0.00317999	0.236976	0.139	0.214	1
Cox19	0.00326116	0.616534	0.252	0.226	1
Mtfr1l	0.00338882	0.246806	0.177	0.266	1
Eif4g1	0.00341318	0.200664	0.255	0.377	1
Polr1d	0.00341321	0.206116	0.425	0.587	1
Pex19	0.00425716	0.51646	0.229	0.197	1
Psmb5	0.00434977	0.575244	0.462	0.504	1
Ccnl2	0.00457555	0.260091	0.21	0.301	1
Atp5g2	0.00475152	0.435375	0.573	0.625	1
Tmem160	0.00539581	0.230837	0.304	0.444	1
Mcts1	0.00545507	0.240159	0.186	0.276	1
Npc2	0.0056729	0.286269	0.684	0.747	1
Auh	0.00675486	0.553248	0.21	0.179	1
Nfe2l1	0.00686563	0.568396	0.252	0.231	1
Mrpl41	0.00733075	0.209874	0.165	0.237	1
Slc25a11	0.00741103	0.258669	0.2	0.29	1
Psma6	0.00771699	0.359968	0.307	0.433	1
Smdt1	0.00842423	0.53897	0.547	0.638	1
Btbd1	0.00880946	0.273973	0.17	0.244	1
Atp1b3	0.00900747	0.21559	0.193	0.279	1
Carhsp1	0.00902223	0.267527	0.295	0.403	1
Pyurf	0.00912325	0.485307	0.21	0.181	1
Nampt	0.0104526	0.552859	0.224	0.199	1
Anapc13	0.0107757	0.60802	0.399	0.42	1
Stk16	0.0112644	0.222501	0.156	0.228	1
Commd4	0.0112977	0.210325	0.175	0.247	1
Sypl	0.0126703	0.479042	0.283	0.27	1
Ywhab	0.0132054	0.50131	0.472	0.527	1
Bola1	0.0137087	0.250873	0.158	0.223	1
BC031181	0.0138106	0.255665	0.276	0.39	1
Anxa6	0.0147456	0.218239	0.285	0.396	1
Psmb3	0.0153261	0.24086	0.387	0.536	1
Zfp106	0.0157832	0.224755	0.175	0.246	1
Atp6v0e	0.0162142	0.219718	0.483	0.652	1
Mlf2	0.0167223	0.254752	0.344	0.472	1
Ndufs4	0.0168976	0.656898	0.446	0.493	1
Cd151	0.0168983	0.227875	0.259	0.352	1
St13	0.0170664	0.229116	0.29	0.411	1
Mrps15	0.017107	0.333884	0.215	0.305	1
2022-03-05	0.0178169	0.608062	0.356	0.363	1
Atp5j	0.0180597	0.351622	0.611	0.712	1
Gars	0.018125	0.201437	0.182	0.257	1
BC004004	0.0184526	0.234288	0.226	0.315	1
Ppp1cb	0.0185799	0.280567	0.248	0.343	1
Eci2	0.0192875	0.64126	0.3	0.294	1
Chchd3	0.0198632	0.573117	0.297	0.298	1
Chchd7	0.020254	0.301694	0.167	0.23	1
Rtn3	0.0224577	0.295049	0.309	0.424	1
Gapdh	0.0227341	0.693384	0.408	0.456	1
Cmpk1	0.0255895	0.608305	0.382	0.399	1
Dnaja2	0.0286847	0.264139	0.252	0.35	1
Mrps33	0.028758	0.419251	0.37	0.511	1
Scd2	0.03002	0.258562	0.203	0.287	1
Fam96a	0.0305045	0.342855	0.2	0.274	1
1500011K16Rik	0.0314622	0.428837	0.241	0.225	1
Pim1	0.0319471	0.513475	0.208	0.187	1
Sfxn1	0.0341887	0.453512	0.439	0.518	1
Malsu1	0.0344821	0.24666	0.186	0.256	1
Nfu1	0.0345699	0.245652	0.205	0.276	1
Pop5	0.0346538	0.509384	0.271	0.256	1
Gcsh	0.0348362	0.445383	0.267	0.254	1
Tmbim4	0.0367952	0.219911	0.271	0.371	1
Bzw1	0.0368157	0.343228	0.269	0.363	1
Mrpl18	0.0370663	0.307205	0.314	0.416	1
H2afj	0.0384354	0.622818	0.361	0.394	1
Qdpr	0.0398557	0.279132	0.179	0.245	1
Mrps12	0.0438915	0.414168	0.262	0.358	1
Glrx5	0.0442677	0.437324	0.392	0.41	1
Cmbl	0.0444903	0.429862	0.229	0.215	1
Qk	0.0452684	0.410087	0.292	0.288	1
Sh3bgrl	0.0479198	0.32203	0.292	0.398	1
Lgals3	0.0487886	0.439051	0.186	0.246	1
C3	0.04893	0.289838	0.63	0.69	1
Derl1	0.0489626	0.498546	0.392	0.436	1
Emc8	0.0507991	0.23503	0.175	0.235	1
Mrpl17	0.051849	0.238194	0.333	0.444	1
Prdx5	0.0518833	0.371977	0.552	0.655	1
Cyhr1	0.051936	0.230503	0.165	0.223	1
Slc25a39	0.0540329	0.520108	0.255	0.25	1
2022-03-02	0.0577959	0.24255	0.307	0.412	1
Edf1	0.0626425	0.3408	0.583	0.67	1
0610009B22Rik	0.0633738	0.221526	0.16	0.215	1
Naa50	0.0638267	0.24719	0.255	0.331	1
Polr2i	0.0650476	0.252844	0.212	0.285	1
Smim20	0.0651756	0.32005	0.203	0.271	1
Cavin2	0.0661067	0.525518	0.281	0.273	1
Sdhaf4	0.0676207	0.347846	0.217	0.285	1
Park7	0.0711656	0.458316	0.526	0.622	1
Mrps21	0.0712866	0.508818	0.446	0.505	1
Map1lc3a	0.072011	0.43404	0.495	0.581	1
Skp1a	0.0726598	0.325938	0.295	0.398	1
Purb	0.0730257	0.2181	0.167	0.223	1
Mrpl28	0.082438	0.333822	0.264	0.352	1
Scoc	0.086668	0.222015	0.163	0.216	1
1700020I14Rik	0.089744	0.289996	0.243	0.318	1
Stat1	0.0927384	0.388631	0.248	0.243	1
Mrps16	0.0937536	0.369193	0.321	0.422	1
Tomm40	0.0938861	0.276769	0.208	0.268	1
Ginm1	0.0987343	0.34571	0.292	0.396	1
Mrps34	0.10018	0.284269	0.233	0.296	1
Arhgap5	0.106484	0.203375	0.189	0.245	1
Cenpb	0.106647	0.254907	0.241	0.31	1
Nxf1	0.110382	0.254252	0.259	0.331	1
Slc25a3	0.115617	0.370365	0.557	0.656	1
Hspb1	0.119193	0.414461	0.259	0.325	1
Tomm7	0.13294	0.462275	0.45	0.525	1
Mrpl15	0.133245	0.413709	0.217	0.278	1
Phb2	0.133603	0.331663	0.373	0.477	1
Oxct1	0.137449	0.411772	0.335	0.359	1
Acaa1a	0.140549	0.277737	0.226	0.29	1
Vdac1	0.140629	0.391273	0.347	0.367	1
Psmd4	0.143692	0.490447	0.408	0.452	1
Bcap31	0.14884	0.455199	0.434	0.531	1
Prelid3b	0.161694	0.661583	0.222	0.224	1
Txn2	0.162525	0.43461	0.349	0.456	1
Ddrgk1	0.164902	0.373623	0.297	0.391	1
Lamtor2	0.165826	0.367999	0.413	0.543	1
BC003965	0.169645	0.279065	0.158	0.203	1
Prnp	0.172243	0.45407	0.328	0.362	1
Pcmtd1	0.187022	0.385067	0.259	0.259	1
Hsd17b10	0.18832	0.443509	0.366	0.41	1
Ptms	0.198811	0.387807	0.505	0.6	1
Pebp1	0.209486	0.27358	0.526	0.671	1
Mrpl55	0.237176	0.447845	0.25	0.262	1
Psmb7	0.239707	0.47765	0.389	0.445	1
Dhrs7	0.243025	0.505013	0.37	0.422	1
Aldh2	0.25044	0.425184	0.469	0.581	1
Nr1h3	0.250785	0.427831	0.226	0.233	1
Clptm1	0.264279	0.420959	0.243	0.251	1
Mocs2	0.267121	0.38833	0.283	0.359	1
Tubb4b	0.269636	0.360292	0.311	0.388	1
Hint1	0.273139	0.307598	0.594	0.681	1
Lrrc58	0.304729	0.40116	0.318	0.349	1
Fmc1	0.304883	0.534563	0.292	0.317	1
Klhl24	0.307342	0.29801	0.179	0.22	1
Mrps24	0.313725	0.502	0.443	0.535	1
Uqcc3	0.333329	0.583683	0.344	0.391	1
Stk11	0.339845	0.397702	0.186	0.229	1
Poldip2	0.340563	0.382161	0.264	0.281	1
Psma3	0.353902	0.290936	0.498	0.638	1
Csde1	0.373853	0.441457	0.389	0.455	1
Mrpl35	0.378786	0.418544	0.222	0.272	1
Cox14	0.380989	0.29345	0.427	0.54	1
Zfp91	0.388635	0.314022	0.259	0.319	1
Pcbd2	0.390509	0.362006	0.222	0.271	1
Ptpa	0.40006	0.522649	0.222	0.233	1
Idh2	0.400309	0.460919	0.304	0.382	1
Mrpl20	0.40325	0.508282	0.396	0.457	1
Gpx1	0.407266	0.475946	0.474	0.59	1
Ube2a	0.455233	0.380634	0.224	0.271	1
Dnajb9	0.463376	0.385879	0.259	0.314	1
Akt2	0.465831	0.39932	0.224	0.238	1
Mpdu1	0.482769	0.466227	0.215	0.231	1
D8Ertd738e	0.486303	0.428439	0.514	0.631	1
Tmem70	0.491679	0.368642	0.203	0.212	1
Gadd45gip1	0.492668	0.417162	0.297	0.329	1
Tmem147	0.495435	0.412137	0.373	0.47	1
Prkaca	0.501882	0.374235	0.179	0.214	1
Btg1	0.502426	0.374073	0.344	0.427	1
Psmb6	0.513497	0.24375	0.483	0.597	1
Iscu	0.521701	0.454077	0.392	0.467	1
Aurkaip1	0.526498	0.409735	0.384	0.434	1
Mrpl14	0.540612	0.514359	0.366	0.435	1
Arl6ip1	0.543005	0.31607	0.458	0.536	1
Pnkd	0.547277	0.402097	0.283	0.313	1
Mrps18a	0.558089	0.446862	0.333	0.409	1
Dctpp1	0.559901	0.225774	0.196	0.221	1
Mmadhc	0.571488	0.352607	0.189	0.224	1
Lamtor1	0.584603	0.370713	0.368	0.432	1
Clic4	0.619463	0.309803	0.361	0.463	1
Ubxn1	0.627213	0.3213	0.401	0.509	1
Mtx2	0.631273	0.43518	0.215	0.252	1
Selenop	0.656397	0.330838	0.571	0.739	1
Eif4g2	0.662802	0.347851	0.488	0.624	1
Neat1	0.667902	0.296025	0.441	0.508	1
Timm50	0.683105	0.323635	0.198	0.208	1
Mrps7	0.683892	0.503775	0.243	0.284	1
Smim10l1	0.687475	0.378803	0.321	0.399	1
Atp6v1e1	0.688972	0.4785	0.304	0.372	1
Trappc6a	0.693286	0.371997	0.231	0.255	1
Clpp	0.697513	0.437362	0.262	0.291	1
Dgcr6	0.703494	0.211673	0.21	0.24	1
Cops9	0.705252	0.502544	0.375	0.481	1
Cmc1	0.723794	0.401986	0.193	0.211	1
Lamtor4	0.736265	0.478967	0.344	0.426	1
Tomm20	0.743313	0.311772	0.425	0.512	1
0610012G03Rik	0.75885	0.487219	0.375	0.446	1
2310039H08Rik	0.807594	0.336792	0.262	0.297	1
Mrps6	0.810245	0.298688	0.193	0.216	1
Mrps14	0.81816	0.457965	0.413	0.503	1
Sh3glb2	0.838654	0.202754	0.198	0.221	1
Mrpl57	0.84785	0.357447	0.3	0.344	1
Mrpl2	0.853547	0.336468	0.193	0.219	1
Mrpl21	0.878375	0.417484	0.257	0.296	1
Arl8b	0.878554	0.27284	0.189	0.211	1
Higd2a	0.881499	0.41363	0.33	0.402	1
Arpp19	0.934009	0.458363	0.366	0.442	1
Mrps23	0.967201	0.478405	0.184	0.206	1
Tmbim6	0.981518	0.336056	0.521	0.66	1
Por	0.981522	0.288973	0.307	0.364	1
Ppa2	0.989815	0.353322	0.186	0.202	1
Atp6v1a	0.995197	0.280116	0.191	0.21	1
1700021F05Rik	0.995587	0.498084	0.186	0.206	1

## Sheet: ProlifDiff
	p_val	avg_logFC	pct.1	pct.2	p_val_adj
Car3	0	3.51424	0.961	0.063	0
Fabp5	0	3.2549	0.963	0.09	0
Fabp4	0	2.99828	0.967	0.113	0
Adipoq	0	2.39331	0.916	0.077	0
Hspd1	0	2.33457	0.996	0.332	0
Cox5a	0	2.27059	0.969	0.351	0
Nnat	0	2.06928	0.729	0.087	0
Rgcc	0	2.0646	0.92	0.099	0
Slc25a5	0	1.983	0.994	0.453	0
Cyc1	0	1.91995	0.977	0.357	0
Hspe1	0	1.8943	0.996	0.558	0
Idh3a	0	1.8645	0.953	0.197	0
Atp5b	0	1.78274	0.975	0.536	0
Ndufab1	0	1.75883	0.987	0.426	0
Gpd1	0	1.71245	0.814	0.077	0
Mdh2	0	1.66534	0.978	0.443	0
Chchd10	0	1.65991	0.574	0.102	0
Atp5o.1	0	1.64944	0.967	0.493	0
Uqcrfs1	0	1.61989	0.957	0.405	0
Ran	0	1.6032	0.979	0.512	0
Mrpl12	0	1.60216	0.978	0.317	0
Dbi	0	1.59324	0.935	0.437	0
H2afz	0	1.58093	0.917	0.438	0
Ak2	0	1.56768	0.959	0.239	0
Ndufb9	0	1.54845	0.969	0.536	0
Rbp4	0	1.53566	0.922	0.186	0
Mcrip2	0	1.53294	0.923	0.134	0
Cox8a	0	1.52613	0.993	0.607	0
Atp5d	0	1.52227	0.977	0.543	0
Atp5a1	0	1.51708	0.97	0.498	0
Cox4i1	0	1.51058	0.979	0.622	0
Chchd2	0	1.50945	0.993	0.655	0
Atp5f1	0	1.50885	0.988	0.599	0
Acsl1	0	1.50309	0.863	0.077	0
Cycs	0	1.49222	0.93	0.265	0
Ndufb10	0	1.48536	0.967	0.543	0
Etfb	0	1.46983	0.952	0.477	0
Phb2	0	1.46817	0.981	0.436	0
Prkar2b	0	1.46745	0.944	0.163	0
Uqcrq	0	1.43245	0.947	0.442	0
Phgdh	0	1.42947	0.907	0.158	0
Mdh1	0	1.42565	0.876	0.408	0
Hspa9	0	1.41674	0.958	0.305	0
C1qbp	0	1.40963	0.958	0.3	0
Uqcr11	0	1.4053	0.958	0.482	0
Aco2	0	1.39599	0.864	0.244	0
Plin1	0	1.38651	0.834	0.045	0
Pla2g16	0	1.38238	0.946	0.353	0
mt-Atp6	0	1.37688	0.271	0.03	0
Sdhd	0	1.373	0.955	0.392	0
Tpi1	0	1.3666	0.961	0.445	0
Atp5h	0	1.34848	0.972	0.589	0
Sod2	0	1.34841	0.938	0.339	0
Tomm20	0	1.34217	0.977	0.473	0
Ndufc2	0	1.34054	0.959	0.514	0
Cebpa	0	1.33422	0.921	0.144	0
Npm1	0	1.30811	0.978	0.708	0
Cox6b1	0	1.30716	0.951	0.556	0
Mrap	0	1.30687	0.819	0.088	0
Uqcr10	0	1.30633	0.952	0.489	0
Ndufs7	0	1.27265	0.96	0.474	0
G0s2	0	1.27202	0.872	0.369	0
Scp2	0	1.27166	0.962	0.493	0
Mrpl18	0	1.26716	0.955	0.372	0
Nhp2	0	1.26626	0.95	0.306	0
Ndufb6	0	1.25968	0.935	0.458	0
Ncl	0	1.25794	0.922	0.471	0
Grpel1	0	1.24792	0.954	0.326	0
Ndufa8	0	1.24638	0.951	0.488	0
Ldhb	0	1.24249	0.864	0.217	0
Cox5b	0	1.2365	0.949	0.496	0
Mif	0	1.23386	0.978	0.457	0
Cox7c	0	1.2338	0.978	0.584	0
Tomm40	0	1.22473	0.931	0.215	0
Rrm2	0	1.22253	0.627	0.036	0
Timm8a1	0	1.21769	0.884	0.119	0
Birc5	0	1.2149	0.684	0.067	0
Hmgb2	0	1.20208	0.703	0.194	0
Ppia	0	1.20143	0.998	0.748	0
Uqcrc1	0	1.19955	0.922	0.41	0
Cox7b	0	1.18484	0.927	0.488	0
Lipe	0	1.18074	0.806	0.067	0
Sdhb	0	1.1805	0.937	0.483	0
Nme1	0	1.18027	0.979	0.493	0
Pclaf	0	1.1799	0.643	0.062	0
Uqcrc2	0	1.17713	0.868	0.343	0
Hadh	0	1.17706	0.924	0.318	0
Ndufb5	0	1.17676	0.962	0.548	0
Immt	0	1.16959	0.921	0.233	0
Cox7a2	0	1.16223	0.965	0.531	0
Eif5a	0	1.1621	0.976	0.654	0
Ndufa4	0	1.14665	0.961	0.605	0
Arxes2	0	1.135	0.826	0.086	0
Dctpp1	0	1.12413	0.879	0.168	0
Ldha	0	1.12282	0.982	0.542	0
Slc25a3	0	1.11978	0.981	0.629	0
Cs	0	1.11585	0.905	0.218	0
Ndufv2	0	1.11537	0.927	0.441	0
Pgk1	0	1.11483	0.945	0.352	0
Hsp90aa1	0	1.11083	0.979	0.667	0
Agpat2	0	1.11013	0.849	0.186	0
Atp5c1	0	1.11011	0.977	0.588	0
Atp5l	0	1.10407	0.962	0.609	0
Aldoa	0	1.10398	0.962	0.618	0
Eif4ebp1	0	1.10306	0.962	0.48	0
Pgam1	0	1.10007	0.953	0.446	0
Hsp90ab1	0	1.08965	0.993	0.813	0
Cluh	0	1.08801	0.803	0.065	0
Tk1	0	1.08514	0.673	0.05	0
Tomm5	0	1.08064	0.973	0.52	0
Mrpl20	0	1.0798	0.956	0.416	0
Tomm22	0	1.06962	0.945	0.415	0
Ndufa12	0	1.06513	0.928	0.425	0
Top2a	0	1.06136	0.516	0.046	0
Serbp1	0	1.05998	0.964	0.569	0
Vdac2	0	1.05784	0.945	0.425	0
Ndufs2	0	1.05723	0.916	0.393	0
Timm13	0	1.05718	0.967	0.533	0
Hmgb3	0	1.05127	0.768	0.075	0
Ranbp1	0	1.05005	0.933	0.515	0
Anp32b	0	1.04579	0.911	0.506	0
Eno1	0	1.04254	0.892	0.238	0
Cdca3	0	1.03696	0.656	0.055	0
Arxes1	0	1.03116	0.747	0.065	0
Ndufb8	0	1.03098	0.935	0.481	0
Cisd1	0	1.02736	0.937	0.268	0
Eif4a1	0	1.0246	0.959	0.591	0
Mrpl34	0	1.02095	0.872	0.266	0
Glrx5	0	1.01921	0.952	0.366	0
Pnpla2	0	1.00942	0.801	0.117	0
Mpc2	0	1.00297	0.924	0.529	0
Set	0	0.998371	0.911	0.433	0
Mrpl42	0	0.995914	0.951	0.434	0
Mrps36	0	0.988659	0.898	0.296	0
Ppp1r1a	0	0.986424	0.692	0.036	0
Echs1	0	0.982478	0.927	0.295	0
Ndufb7	0	0.979964	0.914	0.474	0
Hspa8	0	0.978398	0.934	0.648	0
Ndufs5	0	0.977041	0.931	0.517	0
Emc6	0	0.974488	0.906	0.25	0
2010107E04Rik	0	0.973328	0.909	0.482	0
Ube2s	0	0.971436	0.854	0.485	0
Atp5j2	0	0.968983	0.93	0.568	0
Reep6	0	0.965164	0.712	0.051	0
Fh1	0	0.964273	0.851	0.193	0
Timm50	0	0.959044	0.841	0.158	0
Cks2	0	0.953715	0.735	0.133	0
Ndufaf4	0	0.942515	0.817	0.134	0
Ptma	0	0.941949	0.937	0.692	0
Ndufa10	0	0.940769	0.925	0.332	0
Vdac1	0	0.938722	0.915	0.323	0
Taldo1	0	0.936045	0.843	0.348	0
Uqcrh	0	0.932345	0.942	0.629	0
Bola3	0	0.931211	0.926	0.361	0
mt-Cytb	0	0.930898	0.209	0.025	0
Tmem120a	0	0.930566	0.771	0.157	0
Mtch2	0	0.92896	0.923	0.418	0
Prmt1	0	0.92491	0.88	0.274	0
Ndufs3	0	0.92188	0.908	0.431	0
Uqcrb	0	0.919827	0.893	0.554	0
Adig	0	0.91902	0.629	0.051	0
Dtymk	0	0.914104	0.869	0.271	0
Suclg1	0	0.91219	0.836	0.344	0
Dlat	0	0.910376	0.787	0.126	0
Txn2	0	0.910302	0.938	0.416	0
Mmd	0	0.908144	0.759	0.088	0
Timm17a	0	0.904629	0.926	0.351	0
Eci1	0	0.903001	0.853	0.246	0
Cox14	0	0.90181	0.963	0.505	0
Cct3	0	0.901631	0.907	0.315	0
Cacybp	0	0.897228	0.857	0.282	0
Atp5g1	0	0.896471	0.968	0.615	0
Pa2g4	0	0.895236	0.852	0.251	0
Dnajc15	0	0.894316	0.856	0.237	0
Ifi27	0	0.89321	0.882	0.542	0
Timm9	0	0.891644	0.797	0.122	0
Atad3a	0	0.891164	0.77	0.09	0
Rpsa	0	0.88732	0.993	0.783	0
Mrps16	0	0.883625	0.918	0.382	0
Tufm	0	0.882002	0.815	0.15	0
Atpaf2	0	0.879879	0.731	0.072	0
Selenoh	0	0.878537	0.871	0.283	0
Chchd3	0	0.877869	0.87	0.253	0
Dgat1	0	0.877718	0.682	0.084	0
Tmem147	0	0.872817	0.941	0.431	0
Mrpl51	0	0.872749	0.922	0.42	0
Fkbp4	0	0.87259	0.859	0.247	0
Ube2c	0	0.872489	0.532	0.046	0
Stmn1	0	0.87187	0.681	0.132	0
Timm10	0	0.871107	0.783	0.134	0
Tcp1	0	0.863258	0.911	0.381	0
Mrpl15	0	0.859511	0.865	0.23	0
Atp1a2	0	0.856711	0.812	0.167	0
Idh3b	0	0.848204	0.867	0.278	0
Slc25a10	0	0.847835	0.694	0.071	0
Hnrnpa1	0	0.847696	0.904	0.454	0
Fkbp3	0	0.846605	0.895	0.345	0
Samm50	0	0.845529	0.861	0.251	0
Minos1	0	0.843125	0.933	0.568	0
Cav1	0	0.842597	0.82	0.268	0
Mrpl55	0	0.840071	0.86	0.214	0
Slc25a4	0	0.839349	0.987	0.761	0
Cox7a1	0	0.838455	0.522	0.093	0
Acat1	0	0.831534	0.935	0.431	0
Cenpm	0	0.831503	0.643	0.054	0
Sdhc	0	0.828731	0.89	0.32	0
Rpl18	0	0.826923	0.99	0.788	0
Usmg5	0	0.825293	0.887	0.446	0
Naa10	0	0.82158	0.838	0.196	0
Naa50	0	0.820231	0.878	0.287	0
Tmem14c	0	0.820021	0.915	0.452	0
Nudt19	0	0.813004	0.776	0.145	0
Cox6a1	0	0.812302	0.949	0.619	0
Hnrnpa2b1	0	0.812065	0.965	0.595	0
Cdk1	0	0.809355	0.529	0.053	0
Atp5k	0	0.808804	0.85	0.313	0
Gmnn	0	0.807373	0.595	0.043	0
Gsto1	0	0.806274	0.826	0.171	0
Rack1	0	0.804964	0.986	0.745	0
Eef1g	0	0.802813	0.969	0.746	0
Cebpb	0	0.802125	0.914	0.541	0
Ndufc1	0	0.802051	0.906	0.487	0
Nolc1	0	0.800135	0.758	0.152	0
Dut	0	0.797676	0.748	0.185	0
Ppargc1b	0	0.797501	0.525	0.016	0
Tmem70	0	0.795195	0.792	0.166	0
Mpc1	0	0.792025	0.895	0.489	0
Adipor2	0	0.791009	0.733	0.104	0
Cenpa	0	0.790654	0.524	0.066	0
Hint1	0	0.785201	0.966	0.657	0
Chchd4	0	0.785194	0.708	0.091	0
Tst	0	0.78425	0.686	0.084	0
Nnmt	0	0.782378	0.88	0.439	0
Eif1ad	0	0.782285	0.702	0.111	0
Lsm4	0	0.780466	0.936	0.423	0
Gapdh	0	0.778669	0.917	0.419	0
Cct2	0	0.777886	0.899	0.323	0
Mki67	0	0.776967	0.49	0.041	0
Acadm	0	0.776783	0.778	0.294	0
Nop10	0	0.775682	0.945	0.511	0
Rps27l	0	0.775396	0.976	0.642	0
Smc4	0	0.774031	0.664	0.172	0
Higd1a	0	0.773018	0.895	0.362	0
Cd36	0	0.772271	0.67	0.125	0
Pdhb	0	0.772101	0.816	0.223	0
Dlst	0	0.771504	0.75	0.145	0
Prelid3b	0	0.768814	0.808	0.178	0
Snu13	0	0.768729	0.916	0.456	0
Lyar	0	0.767882	0.78	0.204	0
Gpi1	0	0.766847	0.895	0.366	0
Smc2	0	0.766445	0.582	0.094	0
Ndufa5	0	0.766381	0.872	0.434	0
Gm45716	0	0.766287	0.533	0.025	0
Slc25a19	0	0.766278	0.624	0.068	0
Atp5g2	0	0.765829	0.96	0.598	0
Pmf1	0	0.765393	0.642	0.069	0
Rpl19	0	0.763125	0.994	0.819	0
Cox6c	0	0.761934	0.937	0.637	0
Hadha	0	0.759015	0.795	0.242	0
1700037H04Rik	0	0.756809	0.666	0.082	0
Comtd1	0	0.756196	0.69	0.083	0
Hnrnpu	0	0.754503	0.935	0.509	0
Cks1b	0	0.753649	0.841	0.38	0
Cdc20	0	0.753327	0.44	0.041	0
Rpl8	0	0.75258	0.987	0.816	0
1110008F13Rik	0	0.752325	0.913	0.474	0
Pparg	0	0.751257	0.795	0.192	0
Pebp1	0	0.751178	0.975	0.645	0
Rps2	0	0.744456	0.983	0.78	0
Srm	0	0.744076	0.857	0.348	0
Slc36a2	0	0.741698	0.523	0.027	0
2410015M20Rik	0	0.741634	0.915	0.482	0
Nt5dc2	0	0.740414	0.67	0.096	0
Snrpd1	0	0.739719	0.841	0.328	0
Polr1d	0	0.739226	0.953	0.555	0
Nucks1	0	0.73897	0.904	0.406	0
Rpl13a	0	0.737522	0.965	0.676	0
Ybx1	0	0.733384	0.961	0.728	0
Mrps5	0	0.732777	0.776	0.153	0
Npm3	0	0.732443	0.843	0.294	0
Btf3	0	0.7291	0.977	0.729	0
Pop5	0	0.727524	0.803	0.213	0
2022-03-05	0	0.726631	0.878	0.322	0
Dld	0	0.725405	0.783	0.184	0
Naca	0	0.724189	0.985	0.767	0
Tomm70a	0	0.721934	0.775	0.174	0
Pgls	0	0.721502	0.921	0.474	0
Hnrnpab	0	0.720738	0.905	0.419	0
Pgp	0	0.718588	0.84	0.231	0
Ppp1r14b	0	0.717591	0.957	0.491	0
Mrpl30	0	0.716645	0.927	0.477	0
Cct7	0	0.715909	0.886	0.379	0
Idh3g	0	0.71042	0.835	0.301	0
Prdx3	0	0.707119	0.865	0.275	0
Mrps34	0	0.706994	0.845	0.251	0
Ndufs8	0	0.70557	0.874	0.327	0
Cct5	0	0.705434	0.921	0.504	0
Cmc2	0	0.704256	0.745	0.149	0
Tyms	0	0.703622	0.601	0.094	0
Mrps7	0	0.702967	0.835	0.24	0
Arl4a	0	0.701311	0.879	0.341	0
Nop56	0	0.700307	0.732	0.188	0
Rrm1	0	0.698783	0.597	0.078	0
Coq7	0	0.698399	0.765	0.14	0
Gmps	0	0.697223	0.717	0.141	0
Rpl10a	0	0.696866	0.99	0.806	0
Acadl	0	0.694706	0.777	0.288	0
Lsm2	0	0.692534	0.754	0.208	0
Fam213a	0	0.690833	0.537	0.053	0
Etfa	0	0.686891	0.854	0.475	0
Mrpl41	0	0.684574	0.779	0.193	0
Rpl14	0	0.684106	0.987	0.819	0
Snrpf	0	0.682649	0.903	0.46	0
Idh2	0	0.681292	0.888	0.341	0
Ndufb4	0	0.678977	0.899	0.478	0
Ccna2	0	0.676912	0.452	0.032	0
Ndufs6	0	0.674474	0.88	0.458	0
Ogdh	0	0.674175	0.759	0.201	0
Cavin2	0	0.673806	0.732	0.236	0
Rsl1d1	0	0.673319	0.795	0.222	0
Cdca8	0	0.672054	0.446	0.043	0
Ndufb3	0	0.671685	0.883	0.427	0
Poldip2	0	0.671374	0.827	0.237	0
Phb	0	0.671347	0.738	0.147	0
Ghitm	0	0.670697	0.885	0.398	0
Pfdn6	0	0.66978	0.849	0.295	0
Prps1	0	0.669288	0.609	0.082	0
Mrps26	0	0.669181	0.844	0.272	0
Psmb3	0	0.6691	0.925	0.503	0
Siva1	0	0.66576	0.845	0.294	0
Cct8	0	0.665377	0.862	0.365	0
H2afx	0	0.665069	0.548	0.108	0
Crip2	0	0.664946	0.913	0.498	0
Mrpl35	0	0.664214	0.816	0.228	0
Tsfm	0	0.663259	0.727	0.142	0
Slc25a11	0	0.662315	0.799	0.248	0
Coq5	0	0.660213	0.62	0.08	0
Tkt	0	0.658083	0.876	0.355	0
Rpl3	0	0.656758	0.984	0.828	0
Apex1	0	0.656649	0.732	0.168	0
Ndufa6	0	0.656054	0.885	0.539	0
Mrpl21	0	0.653023	0.834	0.253	0
Adrb3	0	0.651964	0.4	0.009	0
Vegfb	0	0.649549	0.671	0.106	0
Cdk4	0	0.649196	0.866	0.449	0
Atp5g3	0	0.649162	0.903	0.496	0
Mrpl28	0	0.648293	0.876	0.309	0
Mrps35	0	0.647907	0.695	0.123	0
Ddt	0	0.647667	0.836	0.303	0
Orc6	0	0.647577	0.673	0.136	0
Apoo	0	0.647564	0.64	0.096	0
G3bp1	0	0.645669	0.85	0.35	0
Sdha	0	0.645193	0.859	0.35	0
Dpy30	0	0.643863	0.815	0.231	0
Lgals12	0	0.643855	0.504	0.017	0
Ptges3	0	0.641003	0.873	0.351	0
Tmed5	0	0.640347	0.872	0.315	0
Ndufb11	0	0.6401	0.914	0.577	0
Rps3	0	0.637879	0.988	0.851	0
U2af1	0	0.635309	0.857	0.402	0
Gcsh	0	0.635217	0.792	0.212	0
Mrps18b	0	0.633819	0.689	0.122	0
Id1	0	0.632662	0.539	0.105	0
Gnpat	0	0.632602	0.651	0.112	0
Lrrc59	0	0.631743	0.84	0.292	0
Uhrf1	0	0.630163	0.434	0.022	0
Stard7	0	0.629925	0.642	0.098	0
Park7	0	0.629144	0.953	0.595	0
Ifrd2	0	0.628927	0.597	0.073	0
Rps11	0	0.628135	0.994	0.827	0
Rrs1	0	0.627661	0.709	0.151	0
Snrpe	0	0.625656	0.905	0.489	0
Ndufa11	0	0.625083	0.881	0.509	0
Eif1ax	0	0.623684	0.868	0.324	0
Mrpl36	0	0.62362	0.86	0.305	0
Fam162a	0	0.62129	0.902	0.428	0
Pim3	0	0.620192	0.666	0.132	0
Cenpf	0	0.619986	0.407	0.041	0
Hmgn1	0	0.618882	0.952	0.684	0
Rpl15	0	0.617864	0.987	0.805	0
Cnbp	0	0.617757	0.919	0.581	0
0610012G03Rik	0	0.617152	0.896	0.409	0
Hspa4	0	0.616999	0.765	0.219	0
Pabpc1	0	0.616827	0.97	0.662	0
Hmgn5	0	0.615332	0.624	0.098	0
BC003965	0	0.614915	0.735	0.16	0
Ndufa9	0	0.614797	0.786	0.258	0
Mrpl2	0	0.614675	0.751	0.177	0
Aplp2	0	0.614402	0.887	0.47	0
Fitm2	0	0.613643	0.576	0.071	0
Gadd45gip1	0	0.613178	0.85	0.287	0
Hist1h1e	0	0.611895	0.322	0.045	0
Ptges2	0	0.611233	0.585	0.077	0
Fuom	0	0.610208	0.634	0.116	0
Kmt5a	0	0.609207	0.659	0.122	0
Aco1	0	0.608761	0.708	0.142	0
Snrpb	0	0.608007	0.925	0.566	0
Ndufv1	0	0.607586	0.841	0.31	0
Fbl	0	0.607562	0.801	0.254	0
Mcm7	0	0.607159	0.517	0.06	0
Eif3l	0	0.605767	0.842	0.297	0
Tubb4b	0	0.605033	0.762	0.357	0
Mrto4	0	0.604988	0.636	0.119	0
S100a1	0	0.604598	0.847	0.427	0
Hnrnpf	0	0.603394	0.89	0.492	0
Stip1	0	0.603094	0.654	0.129	0
Eef1e1	0	0.602489	0.611	0.092	0
Hdgf	0	0.602405	0.881	0.432	0
Cenpw	0	0.601913	0.498	0.044	0
Ndufs4	0	0.601619	0.871	0.463	0
Mrps17	0	0.601566	0.888	0.345	0
Pcx	0	0.600578	0.55	0.042	0
Jagn1	0	0.597555	0.717	0.184	0
Rnaseh2c	0	0.596779	0.825	0.283	0
Ppif	0	0.595758	0.522	0.045	0
Cat	0	0.594898	0.794	0.231	0
Cyb5b	0	0.593611	0.756	0.189	0
Asf1b	0	0.593391	0.418	0.023	0
Naa20	0	0.593027	0.843	0.319	0
Rpl12	0	0.591866	0.982	0.78	0
Rplp2	0	0.591166	0.987	0.766	0
Mrpl38	0	0.590811	0.696	0.143	0
Rpl29	0	0.590799	0.971	0.744	0
Eif2s1	0	0.590244	0.755	0.213	0
Clpp	0	0.590148	0.819	0.249	0
Mrps14	0	0.588188	0.907	0.47	0
Psma1	0	0.586806	0.842	0.399	0
Sephs2	0	0.586743	0.596	0.084	0
Spc24	0	0.585295	0.516	0.046	0
Coq9	0	0.584368	0.676	0.139	0
Eif5	0	0.583932	0.928	0.569	0
Itpk1	0	0.58303	0.533	0.057	0
Hist1h1b	0	0.582887	0.247	0.011	0
Cmbl	0	0.582575	0.729	0.174	0
Pbk	0	0.581819	0.402	0.023	0
Ccnb2	0	0.581798	0.501	0.057	0
Fmc1	0	0.581651	0.767	0.281	0
Kcnk3	0	0.580776	0.37	0.01	0
Pank3	0	0.580733	0.595	0.103	0
Esco2	0	0.580655	0.346	0.017	0
Psmb5	0	0.580487	0.874	0.474	0
Mrpl11	0	0.575383	0.751	0.195	0
Afg3l2	0	0.574863	0.581	0.087	0
Hmmr	0	0.573979	0.37	0.032	0
Gpx4	0	0.57343	0.962	0.699	0
Rfc4	0	0.572916	0.501	0.056	0
Ube2m	0	0.572395	0.845	0.296	0
Dkc1	0	0.571724	0.613	0.117	0
1110008P14Rik	0	0.571685	0.685	0.223	0
mt-Nd4	0	0.571598	0.239	0.043	0
Emc9	0	0.570076	0.674	0.153	0
Eef1b2	0	0.569875	0.973	0.739	0
Timm44	0	0.569597	0.65	0.121	0
Rps16	0	0.568561	0.992	0.848	0
Mrpl32	0	0.567874	0.819	0.255	0
Lap3	0	0.566211	0.751	0.209	0
Ola1	0	0.565329	0.737	0.197	0
Got2	0	0.565225	0.684	0.162	0
Pimreg	0	0.56447	0.413	0.026	0
Ppp1ca	0	0.564165	0.931	0.608	0
Rps13	0	0.56308	0.988	0.802	0
Dnajc9	0	0.562538	0.572	0.104	0
Rplp0	0	0.561998	0.987	0.852	0
Mcm5	0	0.561511	0.424	0.029	0
Rangrf	0	0.559726	0.591	0.089	0
Mrpl47	0	0.558958	0.529	0.072	0
Pabpc4	0	0.556889	0.683	0.149	0
Acadvl	0	0.555043	0.706	0.274	0
Rpl7	0	0.554908	0.982	0.808	0
Mrps12	0	0.554005	0.857	0.317	0
Cct4	0	0.553718	0.877	0.447	0
Gspt1	0	0.552661	0.818	0.287	0
Hibch	0	0.551423	0.559	0.074	0
Gfer	0	0.550971	0.644	0.118	0
Banf1	0	0.550009	0.863	0.328	0
Gins2	0	0.549961	0.474	0.056	0
Ddx39	0	0.549932	0.616	0.118	0
Letm1	0	0.549722	0.648	0.133	0
Mrps6	0	0.549018	0.724	0.176	0
Tpx2	0	0.54874	0.392	0.037	0
1700021F05Rik	0	0.548665	0.702	0.166	0
Mrps22	0	0.546896	0.518	0.063	0
Aifm2	0	0.546751	0.493	0.062	0
Hsd17b10	0	0.546629	0.873	0.373	0
Lman2	0	0.546469	0.893	0.436	0
Uck1	0	0.543111	0.629	0.132	0
Wdr18	0	0.54231	0.664	0.138	0
Mrpl17	0	0.540187	0.899	0.406	0
Atp5j	0	0.540172	0.957	0.691	0
Fxn	0	0.540156	0.556	0.082	0
Ppa1	0	0.538833	0.833	0.303	0
Dek	0	0.537526	0.741	0.336	0
Etfdh	0	0.53725	0.591	0.128	0
Rps9	0	0.536681	0.989	0.827	0
Nasp	0	0.536172	0.629	0.158	0
Psmb6	0	0.535771	0.924	0.569	0
Psmb7	0	0.535508	0.874	0.411	0
Phf5a	0	0.535044	0.786	0.245	0
Akap1	0	0.534727	0.459	0.043	0
Sgta	0	0.534607	0.838	0.297	0
Eif3i	0	0.533868	0.937	0.557	0
Ndufs1	0	0.533488	0.644	0.128	0
Mtx2	0	0.53342	0.74	0.213	0
Rps8	0	0.533342	0.986	0.801	0
Fam136a	0	0.532296	0.615	0.115	0
Pde3b	0	0.531861	0.467	0.038	0
Dnaja3	0	0.531113	0.57	0.096	0
Rangap1	0	0.530788	0.518	0.076	0
Knstrn	0	0.529622	0.425	0.043	0
Rpl32	0	0.529489	0.993	0.867	0
Alyref	0	0.529345	0.732	0.232	0
Mrpl57	0	0.528195	0.842	0.304	0
Reep5	0	0.52811	0.948	0.65	0
Pfkl	0	0.527908	0.59	0.091	0
Dbt	0	0.526686	0.523	0.07	0
Mrps25	0	0.525486	0.748	0.199	0
Fam13a	0	0.525476	0.417	0.068	0
Psma5	0	0.52543	0.911	0.509	0
Ezh2	0	0.524376	0.48	0.073	0
Mrps23	0	0.524016	0.696	0.167	0
Hadhb	0	0.523255	0.73	0.274	0
Ruvbl2	0	0.52284	0.57	0.101	0
Hibadh	0	0.522655	0.816	0.28	0
Rps10	0	0.52218	0.983	0.781	0
Hells	0	0.521913	0.348	0.025	0
Pycrl	0	0.521485	0.598	0.105	0
Rpl28	0	0.52147	0.989	0.808	0
Metap2	0	0.520722	0.879	0.395	0
Psmb2	0	0.520673	0.922	0.613	0
Rpl6	0	0.520184	0.985	0.846	0
Pex16	0	0.519055	0.573	0.102	0
Prc1	0	0.518956	0.322	0.032	0
Mrps33	0	0.517928	0.907	0.478	0
Coa3	0	0.517713	0.905	0.454	0
Slfn9	0	0.51701	0.432	0.075	0
Rpl18a	0	0.515243	0.993	0.849	0
Emg1	0	0.514887	0.866	0.411	0
Mrpl3	0	0.514489	0.63	0.127	0
Mtfp1	0	0.514089	0.395	0.017	0
Mrpl19	0	0.514085	0.557	0.089	0
Rps17	0	0.512333	0.992	0.833	0
Ccnb1	0	0.51134	0.359	0.029	0
Sssca1	0	0.510411	0.658	0.142	0
Mthfd2	0	0.5076	0.494	0.078	0
Fcor	0	0.507424	0.423	0.029	0
Gfm1	0	0.506876	0.5	0.063	0
Odc1	0	0.506716	0.717	0.2	0
Abhd5	0	0.506391	0.647	0.155	0
Ssrp1	0	0.503968	0.742	0.283	0
Gtpbp4	0	0.50386	0.645	0.153	0
Ciapin1	0	0.503694	0.573	0.097	0
Ppargc1a	0	0.501527	0.3	0.013	0
Shmt1	0	0.501364	0.396	0.01	0
Spc25	0	0.500817	0.347	0.029	0
Mcm6	0	0.500287	0.434	0.066	0
Lig1	0	0.500209	0.419	0.054	0
Mrpl9	0	0.499833	0.627	0.143	0
Car2	0	0.499676	0.308	0.007	0
Tmpo	0	0.496898	0.609	0.157	0
Bckdhb	0	0.495983	0.571	0.1	0
Mrps15	0	0.494735	0.807	0.264	0
Rpl24	0	0.49315	0.992	0.83	0
Ppil1	0	0.492753	0.543	0.097	0
Ywhab	0	0.492414	0.916	0.496	0
Srsf7	0	0.492304	0.742	0.321	0
Isca2	0	0.491703	0.628	0.144	0
Dynll2	0	0.490864	0.804	0.289	0
Aurkaip1	0	0.48823	0.887	0.398	0
Nop58	0	0.488156	0.762	0.286	0
Uchl3	0	0.488017	0.685	0.169	0
Qdpr	0	0.487785	0.711	0.207	0
Tmx2	0	0.487183	0.58	0.109	0
Usp1	0	0.486769	0.59	0.153	0
Esrra	0	0.486485	0.488	0.069	0
Glrx3	0	0.485209	0.89	0.475	0
Dot1l	0	0.484296	0.473	0.056	0
Mrpl49	0	0.483821	0.587	0.105	0
Sucla2	0	0.482391	0.717	0.228	0
Vars	0	0.48232	0.539	0.094	0
Rps6	0	0.482318	0.982	0.851	0
Lsm5	0	0.482066	0.735	0.243	0
Mrpl45	0	0.481863	0.58	0.12	0
Ccdc58	0	0.481616	0.57	0.108	0
Bzw2	0	0.481355	0.636	0.154	0
Sfxn1	0	0.480914	0.921	0.485	0
Oaz1	0	0.479879	0.985	0.778	0
Mrps18a	0	0.479849	0.864	0.372	0
Hnrnpc	0	0.478902	0.867	0.423	0
Mcur1	0	0.478792	0.635	0.149	0
Ppp2r5a	0	0.477557	0.693	0.18	0
Slc19a1	0	0.476926	0.438	0.038	0
Smoc1	0	0.476488	0.407	0.036	0
Ddx39b	0	0.475954	0.763	0.31	0
Ung	0	0.475146	0.326	0.024	0
Rpl27a	0	0.473486	0.989	0.846	0
Ndrg2	0	0.472942	0.644	0.176	0
Hat1	0	0.472827	0.478	0.077	0
Ubac1	0	0.471913	0.555	0.101	0
D10Jhu81e	0	0.471872	0.715	0.202	0
Mrps10	0	0.470181	0.672	0.163	0
Isoc1	0	0.470026	0.564	0.111	0
Wdr12	0	0.468707	0.497	0.077	0
Pdha1	0	0.466822	0.791	0.279	0
Rcc2	0	0.466752	0.512	0.079	0
Lsm12	0	0.465233	0.736	0.215	0
Hist1h4i	0	0.465039	0.355	0.034	0
Ecsit	0	0.464594	0.495	0.071	0
Fam96a	0	0.463148	0.739	0.236	0
Parp1	0	0.46288	0.542	0.094	0
Snrpd3	0	0.462169	0.795	0.342	0
Psph	0	0.462029	0.539	0.101	0
Cpt2	0	0.461225	0.577	0.121	0
Mrpl46	0	0.460659	0.568	0.109	0
Anp32e	0	0.458654	0.681	0.194	0
Lpgat1	0	0.458107	0.604	0.15	0
Zfp106	0	0.45798	0.687	0.21	0
Ptcd3	0	0.457554	0.448	0.051	0
Ap3s1	0	0.457191	0.912	0.492	0
Ppm1g	0	0.45711	0.636	0.16	0
Nudt5	0	0.45704	0.602	0.131	0
Ndufb2	0	0.456884	0.811	0.367	0
Ppid	0	0.456691	0.602	0.166	0
Dohh	0	0.45563	0.661	0.171	0
Psat1	0	0.454785	0.516	0.093	0
Prlr	0	0.45448	0.354	0.027	0
Pole3	0	0.453971	0.678	0.197	0
Bscl2	0	0.453698	0.766	0.253	0
Tmem238	0	0.453546	0.556	0.091	0
Cdkn2c	0	0.453148	0.542	0.103	0
Rps27a	0	0.452884	0.991	0.852	0
Ndufaf6	0	0.452408	0.468	0.059	0
Cops3	0	0.451525	0.636	0.163	0
Mrps30	0	0.45142	0.629	0.149	0
Gale	0	0.450803	0.35	0.019	0
Gar1	0	0.450799	0.669	0.191	0
Tspan12	0	0.450371	0.477	0.066	0
Paics	0	0.449733	0.708	0.226	0
Mcm3	0	0.448212	0.393	0.046	0
Impa2	0	0.448108	0.399	0.032	0
Acp1	0	0.446982	0.862	0.398	0
Denr	0	0.446938	0.827	0.345	0
Mrpl22	0	0.44692	0.641	0.151	0
Pdhx	0	0.445699	0.419	0.044	0
Coq8a	0	0.443979	0.267	0.034	0
Cd320	0	0.443235	0.62	0.151	0
Nop16	0	0.442408	0.548	0.106	0
Nap1l4	0	0.442376	0.682	0.201	0
Cisd3	0	0.441987	0.647	0.191	0
Lsm3	0	0.441085	0.705	0.248	0
Gemin6	0	0.440844	0.453	0.064	0
Hmgn2	0	0.440323	0.664	0.189	0
Acads	0	0.44019	0.659	0.18	0
Ppdpf	0	0.439858	0.856	0.373	0
Cidec	0	0.439342	0.415	0.032	0
Hnrnpd	0	0.439099	0.709	0.26	0
Dazap1	0	0.438957	0.755	0.258	0
Strap	0	0.437833	0.798	0.309	0
Psmg1	0	0.435466	0.579	0.137	0
Sh3glb2	0	0.435072	0.654	0.186	0
Tfrc	0	0.434842	0.28	0.009	0
2310061I04Rik	0	0.43421	0.442	0.059	0
Hdhd2	0	0.433353	0.601	0.139	0
Chchd1	0	0.43331	0.861	0.397	0
Srsf1	0	0.433274	0.681	0.195	0
Eif4g1	0	0.432048	0.823	0.34	0
Larp1b	0	0.431853	0.454	0.059	0
Ss18l2	0	0.431816	0.612	0.148	0
Mrpl37	0	0.431584	0.508	0.091	0
Mecr	0	0.431549	0.497	0.079	0
Bcat2	0	0.431319	0.583	0.139	0
Snrpa1	0	0.431282	0.665	0.199	0
Caprin1	0	0.430725	0.786	0.293	0
Adsl	0	0.430253	0.55	0.103	0
Rabggtb	0	0.429707	0.63	0.156	0
Stoml2	0	0.429658	0.743	0.25	0
Uchl5	0	0.429061	0.516	0.097	0
Gpatch4	0	0.428501	0.493	0.087	0
Ebna1bp2	0	0.428478	0.721	0.256	0
Lmnb1	0	0.427797	0.432	0.063	0
Crls1	0	0.427439	0.582	0.13	0
Ddx21	0	0.426524	0.542	0.12	0
C1qtnf12	0	0.426103	0.729	0.229	0
Ipo5	0	0.426032	0.578	0.128	0
Atad2	0	0.425835	0.413	0.066	0
Pdap1	0	0.42528	0.852	0.405	0
Dnajc19	0	0.425256	0.849	0.378	0
Adh5	0	0.425058	0.717	0.234	0
Gys1	0	0.425005	0.37	0.033	0
Mrpl43	0	0.424756	0.751	0.24	0
Rwdd4a	0	0.424552	0.54	0.101	0
Srpk1	0	0.424131	0.641	0.166	0
Srebf1	0	0.424122	0.552	0.132	0
Dhrs4	0	0.424103	0.719	0.22	0
Aifm1	0	0.424058	0.464	0.074	0
Fubp1	0	0.423724	0.717	0.24	0
Dhfr	0	0.422268	0.391	0.047	0
Gk	0	0.422105	0.245	0.022	0
4931406C07Rik	0	0.422031	0.496	0.104	0
Fam210a	0	0.422016	0.442	0.063	0
Rfc2	0	0.421466	0.544	0.139	0
Ube3a	0	0.421304	0.821	0.337	0
Tmem11	0	0.420696	0.7	0.207	0
Itpa	0	0.419574	0.605	0.157	0
Eif3g	0	0.418697	0.817	0.366	0
Trap1	0	0.418109	0.556	0.125	0
Nadk	0	0.417806	0.711	0.223	0
Eprs	0	0.417624	0.865	0.395	0
Rfc1	0	0.417294	0.631	0.192	0
Hccs	0	0.4172	0.477	0.068	0
Haus4	0	0.416644	0.412	0.052	0
Kpnb1	0	0.415956	0.68	0.212	0
Cenpe	0	0.415574	0.296	0.033	0
Rpl7l1	0	0.414646	0.69	0.216	0
1190007I07Rik	0	0.414571	0.445	0.067	0
Ak6	0	0.41354	0.607	0.151	0
Pin1	0	0.413064	0.783	0.296	0
Slc25a51	0	0.41255	0.648	0.207	0
Tmem97	0	0.412227	0.59	0.154	0
Mrps11	0	0.411922	0.636	0.165	0
Letmd1	0	0.411177	0.409	0.06	0
Txnl4a	0	0.410583	0.72	0.241	0
Lzic	0	0.410137	0.47	0.077	0
Hint2	0	0.409887	0.722	0.231	0
G3bp2	0	0.409815	0.835	0.352	0
Dgat2	0	0.408122	0.455	0.056	0
A530016L24Rik	0	0.407328	0.314	0.01	0
Tob1	0	0.406349	0.601	0.185	0
Ephx2	0	0.40623	0.575	0.127	0
Mrpl16	0	0.405993	0.549	0.114	0
Cox10	0	0.405672	0.414	0.049	0
Ywhag	0	0.405498	0.749	0.249	0
Psme3	0	0.405393	0.557	0.116	0
Zfp91	0	0.404718	0.756	0.284	0
Pgm2	0	0.404283	0.646	0.19	0
Aoc3	0	0.40418	0.709	0.236	0
Dnajc11	0	0.403522	0.437	0.063	0
Hcar1	0	0.403363	0.317	0.015	0
Ahsa1	0	0.403073	0.676	0.222	0
Exosc5	0	0.402937	0.599	0.146	0
2300009A05Rik	0	0.402304	0.53	0.107	0
Pdss1	0	0.401095	0.339	0.02	0
Cd1d1	0	0.400168	0.38	0.043	0
Mcm2	0	0.399105	0.319	0.026	0
Incenp	0	0.398958	0.316	0.028	0
Rreb1	0	0.398829	0.419	0.059	0
Mad2l1	0	0.397939	0.359	0.035	0
Taf1d	0	0.39717	0.599	0.176	0
Pyurf	0	0.396132	0.596	0.148	0
Cib2	0	0.395809	0.341	0.054	0
Aurkb	0	0.395443	0.276	0.023	0
Larp4	0	0.395175	0.545	0.111	0
Fdx1	0	0.394741	0.795	0.312	0
Grsf1	0	0.39445	0.512	0.104	0
Rpa2	0	0.394166	0.404	0.073	0
Pxmp2	0	0.393886	0.297	0.013	0
Endog	0	0.393791	0.607	0.169	0
Eif3b	0	0.393748	0.727	0.242	0
Pnkd	0	0.393212	0.745	0.279	0
Mcee	0	0.392969	0.712	0.252	0
Noc2l	0	0.39209	0.461	0.085	0
Oxnad1	0	0.391566	0.395	0.052	0
Rpa3	0	0.391506	0.671	0.212	0
Eif2b1	0	0.391223	0.52	0.103	0
Mrpl58	0	0.390946	0.774	0.27	0
Rfc5	0	0.389737	0.408	0.058	0
Hsph1	0	0.389474	0.463	0.086	0
Ffar4	0	0.388731	0.27	0.005	0
Oxld1	0	0.387443	0.387	0.056	0
Syncrip	0	0.387433	0.747	0.269	0
Atic	0	0.385588	0.531	0.128	0
Mrps27	0	0.385539	0.356	0.04	0
Tardbp	0	0.385283	0.654	0.19	0
Ccne1	0	0.383378	0.309	0.018	0
Gm47283	0	0.382637	0.564	0.158	0
Racgap1	0	0.382064	0.328	0.035	0
Prim1	0	0.381623	0.336	0.032	0
Hipk2	0	0.380169	0.344	0.033	0
Hpf1	0	0.379255	0.608	0.18	0
Pnn	0	0.37866	0.705	0.251	0
Psmd3	0	0.37853	0.675	0.21	0
Smarca4	0	0.378131	0.539	0.128	0
Pold2	0	0.378052	0.489	0.1	0
Gnl3	0	0.378003	0.647	0.226	0
Anapc15	0	0.377423	0.459	0.078	0
Apmap	0	0.377223	0.475	0.096	0
Cdv3	0	0.376759	0.774	0.294	0
Exosc4	0	0.375872	0.666	0.204	0
Tmem37	0	0.375275	0.407	0.062	0
Haus8	0	0.374899	0.367	0.043	0
Pradc1	0	0.374488	0.469	0.085	0
Mpdu1	0	0.374325	0.648	0.198	0
Acot13	0	0.374063	0.631	0.2	0
Snrnp25	0	0.373874	0.492	0.095	0
Opa1	0	0.373841	0.428	0.075	0
Mrps9	0	0.373214	0.533	0.118	0
Psmd12	0	0.372968	0.731	0.267	0
Mpv17l2	0	0.372339	0.677	0.22	0
Hmbs	0	0.37157	0.591	0.147	0
Bpnt1	0	0.371084	0.418	0.057	0
Abhd11	0	0.370645	0.631	0.18	0
Pex11a	0	0.370637	0.352	0.048	0
Plk1	0	0.370195	0.267	0.023	0
Pex14	0	0.369556	0.535	0.12	0
Slc1a3	0	0.368506	0.581	0.16	0
Hagh	0	0.368318	0.698	0.23	0
Adhfe1	0	0.368197	0.395	0.057	0
Nifk	0	0.368156	0.513	0.105	0
Dnaja2	0	0.367915	0.775	0.315	0
Mtx1	0	0.367724	0.573	0.148	0
Cox19	0	0.366664	0.646	0.193	0
Ube2a	0	0.366413	0.717	0.235	0
Abce1	0	0.365856	0.543	0.127	0
Txnrd1	0	0.365432	0.623	0.173	0
Mrpl4	0	0.36485	0.758	0.277	0
Foxred1	0	0.364807	0.397	0.055	0
Pla2g12a	0	0.364755	0.55	0.13	0
Coq6	0	0.364565	0.413	0.063	0
Sik2	0	0.364546	0.362	0.046	0
Prkaca	0	0.364499	0.611	0.182	0
Abcf1	0	0.363924	0.701	0.238	0
Fam69b	0	0.363755	0.457	0.102	0
Psmc3ip	0	0.363739	0.322	0.026	0
Gtf3a	0	0.363199	0.677	0.218	0
Aqp7	0	0.363167	0.319	0.014	0
Hsd17b12	0	0.363	0.685	0.203	0
Ipo7	0	0.362997	0.482	0.097	0
Aurka	0	0.362428	0.258	0.018	0
Cav2	0	0.362053	0.428	0.063	0
Mrpl13	0	0.361838	0.754	0.267	0
Rasd1	0	0.360461	0.241	0.016	0
Thyn1	0	0.360263	0.452	0.079	0
Alad	0	0.359882	0.485	0.098	0
Pmpcb	0	0.359112	0.606	0.158	0
Mrpl50	0	0.358472	0.605	0.157	0
Hras	0	0.358464	0.692	0.227	0
Grb14	0	0.358368	0.432	0.096	0
Ptcd2	0	0.358278	0.433	0.075	0
Med9	0	0.357952	0.557	0.141	0
Ormdl3	0	0.357571	0.67	0.22	0
Ppan	0	0.35702	0.473	0.092	0
Topbp1	0	0.356952	0.376	0.058	0
Rpa1	0	0.356091	0.407	0.066	0
Tipin	0	0.355821	0.575	0.184	0
Mak16	0	0.35578	0.498	0.106	0
Dnajc2	0	0.355464	0.543	0.147	0
Tfam	0	0.355349	0.512	0.112	0
Cdt1	0	0.354691	0.274	0.02	0
Larp1	0	0.35322	0.525	0.127	0
Vgll4	0	0.350878	0.567	0.169	0
Lockd	0	0.350852	0.333	0.046	0
Rnps1	0	0.350237	0.603	0.177	0
Tcf19	0	0.350141	0.296	0.042	0
Ppp5c	0	0.349239	0.555	0.137	0
Car13	0	0.348852	0.471	0.103	0
Cdca7	0	0.348747	0.298	0.023	0
Gart	0	0.348653	0.44	0.077	0
Sh2b2	0	0.34783	0.287	0.017	0
Rnf5	0	0.347764	0.578	0.158	0
Emc8	0	0.347256	0.65	0.201	0
Nsun2	0	0.346099	0.562	0.156	0
Cenpv	0	0.345937	0.443	0.097	0
Mrpl44	0	0.34575	0.426	0.079	0
Farsb	0	0.345586	0.478	0.094	0
Usp14	0	0.344961	0.525	0.123	0
Ube2f	0	0.344748	0.596	0.159	0
Timm22	0	0.344655	0.634	0.18	0
Lsm8	0	0.344105	0.658	0.233	0
Abcb8	0	0.343823	0.337	0.04	0
Uqcc1	0	0.343426	0.39	0.056	0
Cox18	0	0.343206	0.428	0.081	0
Fgfrl1	0	0.342624	0.444	0.08	0
Wdr43	0	0.342479	0.454	0.097	0
Mthfd1	0	0.341878	0.352	0.039	0
Lpin1	0	0.341528	0.406	0.087	0
Slc25a33	0	0.341335	0.33	0.043	0
Parl	0	0.341271	0.62	0.194	0
Timm21	0	0.341184	0.508	0.124	0
Syce2	0	0.340633	0.332	0.037	0
Epb41l1	0	0.340449	0.5	0.119	0
Sac3d1	0	0.34042	0.463	0.096	0
Ssbp1	0	0.339182	0.733	0.268	0
Noct	0	0.338606	0.356	0.053	0
Dctd	0	0.337614	0.309	0.029	0
Ncbp1	0	0.337301	0.408	0.066	0
Thrap3	0	0.337284	0.713	0.269	0
Nudcd2	0	0.336808	0.748	0.285	0
Pex13	0	0.336172	0.554	0.139	0
Cdkn3	0	0.335507	0.314	0.038	0
Wdr77	0	0.334473	0.469	0.097	0
Aspm	0	0.334039	0.247	0.021	0
Ftsj3	0	0.333823	0.435	0.08	0
Txlng	0	0.333395	0.402	0.076	0
Slc25a39	0	0.332184	0.65	0.218	0
Alkbh7	0	0.332176	0.504	0.128	0
Lsm1	0	0.331101	0.683	0.25	0
Hdac2	0	0.330992	0.678	0.241	0
Ppp2r1b	0	0.330516	0.361	0.049	0
Mpp6	0	0.330506	0.525	0.125	0
C030006K11Rik	0	0.330277	0.341	0.041	0
Ndc1	0	0.330219	0.325	0.035	0
Pcna	0	0.329968	0.374	0.072	0
Eif3d	0	0.329179	0.689	0.255	0
C130074G19Rik	0	0.328791	0.256	0.01	0
Traf4	0	0.328187	0.57	0.149	0
Rad51ap1	0	0.327931	0.246	0.017	0
Sh3pxd2a	0	0.327761	0.574	0.176	0
Maip1	0	0.327635	0.462	0.103	0
Bola1	0	0.327392	0.612	0.191	0
Mybbp1a	0	0.326535	0.465	0.106	0
Oxa1l	0	0.325781	0.515	0.135	0
Kars	0	0.325249	0.593	0.174	0
Fam213b	0	0.325186	0.452	0.124	0
Anln	0	0.324132	0.287	0.033	0
Dnph1	0	0.324123	0.281	0.018	0
Mcts2	0	0.323802	0.356	0.057	0
Trmt10c	0	0.323726	0.388	0.061	0
Sdhaf1	0	0.32341	0.517	0.126	0
Rnf126	0	0.322796	0.501	0.126	0
Hmgcs1	0	0.322309	0.56	0.158	0
Stk16	0	0.322076	0.636	0.194	0
Lsm6	0	0.321869	0.788	0.327	0
Tank	0	0.32111	0.472	0.107	0
Dhrs7b	0	0.32028	0.527	0.131	0
Srsf10	0	0.320104	0.689	0.226	0
Mrpl40	0	0.319626	0.639	0.209	0
Ndufaf5	0	0.319297	0.309	0.04	0
Tfdp1	0	0.318155	0.466	0.111	0
Knl1	0	0.317387	0.246	0.02	0
Coa7	0	0.317034	0.384	0.062	0
Trappc5	0	0.31672	0.596	0.155	0
Pno1	0	0.316511	0.422	0.077	0
Rcc1	0	0.316424	0.322	0.039	0
Slc5a3	0	0.31512	0.419	0.086	0
Mcm4	0	0.314408	0.302	0.046	0
Acox1	0	0.313959	0.501	0.125	0
Ckap2l	0	0.312044	0.258	0.027	0
Grwd1	0	0.311715	0.352	0.052	0
Coq3	0	0.311648	0.33	0.051	0
Tmem33	0	0.311618	0.657	0.234	0
Las1l	0	0.311349	0.467	0.105	0
Etfrf1	0	0.311333	0.441	0.101	0
Ptrh2	0	0.311209	0.446	0.107	0
Tmem120b	0	0.311051	0.32	0.033	0
Smarcc1	0	0.31046	0.54	0.16	0
Tenm4	0	0.309404	0.278	0.021	0
Thop1	0	0.308583	0.371	0.064	0
Pes1	0	0.308477	0.439	0.099	0
Hacd2	0	0.308347	0.625	0.215	0
Rad21	0	0.308325	0.553	0.178	0
2022-09-06	0	0.308006	0.377	0.081	0
Pus1	0	0.307479	0.418	0.086	0
Gnai1	0	0.306704	0.339	0.052	0
Cenpq	0	0.306672	0.281	0.029	0
Rcl1	0	0.305504	0.478	0.112	0
Got1	0	0.305096	0.422	0.095	0
Lrpprc	0	0.304966	0.293	0.031	0
Miga2	0	0.304388	0.288	0.028	0
Tomm40l	0	0.303875	0.397	0.074	0
Chchd6	0	0.30301	0.527	0.139	0
3110043O21Rik	0	0.30298	0.291	0.036	0
Fen1	0	0.302758	0.265	0.031	0
Yars2	0	0.302739	0.349	0.051	0
Exosc8	0	0.302529	0.517	0.144	0
Blvra	0	0.302295	0.55	0.162	0
Wdr75	0	0.302151	0.433	0.092	0
Lrig1	0	0.301509	0.379	0.071	0
Ncapg2	0	0.301211	0.271	0.029	0
Prpf38b	0	0.301018	0.631	0.212	0
Slc16a1	0	0.300794	0.359	0.059	0
Luc7l3	0	0.300444	0.707	0.266	0
Mrpl10	0	0.300102	0.494	0.126	0
Ddx46	0	0.299915	0.633	0.214	0
Impa1	0	0.29982	0.475	0.124	0
1110004E09Rik	0	0.299726	0.473	0.109	0
Mknk2	0	0.299686	0.528	0.149	0
Mrm3	0	0.299274	0.299	0.029	0
Armc1	0	0.298353	0.595	0.179	0
Shmt2	0	0.298234	0.404	0.082	0
Naa15	0	0.298018	0.493	0.128	0
Tubg1	0	0.297668	0.375	0.063	0
Bysl	0	0.297474	0.336	0.051	0
Kif11	0	0.297016	0.223	0.018	0
Bop1	0	0.296962	0.344	0.058	0
Rsl24d1	0	0.295591	0.571	0.161	0
Mut	0	0.295502	0.444	0.102	0
Apip	0	0.294187	0.507	0.129	0
Fahd1	0	0.293548	0.391	0.092	0
Ptgr2	0	0.293446	0.474	0.12	0
Hirip3	0	0.293082	0.298	0.046	0
Rps19bp1	0	0.293044	0.542	0.154	0
Pmpca	0	0.292993	0.409	0.085	0
Acat2	0	0.292907	0.316	0.051	0
Mrpl39	0	0.292666	0.429	0.097	0
Nop2	0	0.292382	0.36	0.057	0
Baz1a	0	0.292326	0.477	0.122	0
Mphosph10	0	0.291797	0.439	0.099	0
Mrps2	0	0.291442	0.31	0.037	0
Wfdc21	0	0.290883	0.22	0.018	0
Asns	0	0.290569	0.391	0.088	0
Fndc5	0	0.290528	0.254	0.033	0
Ivns1abp	0	0.290036	0.439	0.106	0
Mfn2	0	0.289169	0.36	0.066	0
Iars2	0	0.288991	0.416	0.091	0
2022-09-09	0	0.288649	0.465	0.119	0
Hspa14	0	0.288445	0.473	0.122	0
Aimp2	0	0.288282	0.477	0.132	0
Dhx9	0	0.288195	0.512	0.131	0
Abcb6	0	0.288166	0.274	0.033	0
Dnmt1	0	0.288095	0.322	0.055	0
Erh	0	0.287982	0.533	0.151	0
Fam49b	0	0.287976	0.322	0.05	0
Orc2	0	0.287925	0.333	0.055	0
Tysnd1	0	0.287527	0.391	0.08	0
Clspn	0	0.287472	0.233	0.023	0
Rrp9	0	0.287091	0.376	0.068	0
Cdc34	0	0.286465	0.511	0.133	0
Thoc3	0	0.286447	0.488	0.123	0
Clstn3	0	0.285526	0.211	0.018	0
Chaf1a	0	0.285443	0.248	0.024	0
Uck2	0	0.283585	0.281	0.03	0
Mrpl1	0	0.283545	0.368	0.064	0
Coa5	0	0.282573	0.495	0.127	0
Fbxo21	0	0.281937	0.353	0.071	0
Clybl	0	0.281849	0.37	0.071	0
Ptpa	0	0.281793	0.622	0.202	0
Mrps31	0	0.281681	0.357	0.071	0
Agpat5	0	0.281505	0.426	0.094	0
Nip7	0	0.281262	0.496	0.14	0
Tspan18	0	0.281246	0.282	0.029	0
Trp53inp2	0	0.28102	0.336	0.079	0
Cinp	0	0.280357	0.456	0.117	0
Nup43	0	0.279878	0.289	0.038	0
Nrm	0	0.27967	0.298	0.048	0
Itpr2	0	0.279613	0.469	0.132	0
Tlcd1	0	0.279472	0.418	0.094	0
Sorbs1	0	0.279113	0.256	0.035	0
Flad1	0	0.278622	0.283	0.037	0
Ncapd2	0	0.278409	0.266	0.029	0
2810004N23Rik	0	0.277758	0.548	0.168	0
Cmss1	0	0.276672	0.356	0.064	0
Rpusd3	0	0.276503	0.263	0.023	0
Sirt3	0	0.276468	0.413	0.097	0
Pgd	0	0.276322	0.631	0.21	0
Dus1l	0	0.276312	0.376	0.071	0
Baz1b	0	0.275698	0.639	0.216	0
Tacc3	0	0.275626	0.279	0.037	0
Rxrg	0	0.275594	0.244	0.018	0
Mul1	0	0.275549	0.337	0.067	0
Suz12	0	0.275454	0.381	0.079	0
Mxd3	0	0.275067	0.229	0.028	0
Nop14	0	0.273439	0.464	0.115	0
C330027C09Rik	0	0.273415	0.24	0.022	0
Gm10053	0	0.273274	0.234	0.016	0
Cenpp	0	0.27303	0.244	0.019	0
Rpp14	0	0.272844	0.506	0.135	0
Slc35a4	0	0.272769	0.432	0.108	0
Mtss1l	0	0.272659	0.262	0.025	0
Ncapg	0	0.272214	0.21	0.014	0
Actl6a	0	0.27221	0.461	0.107	0
Mfsd12	0	0.271145	0.272	0.03	0
Gcdh	0	0.270986	0.356	0.066	0
Luc7l	0	0.270138	0.454	0.113	0
Cpsf2	0	0.270079	0.469	0.118	0
Slc2a4	0	0.269864	0.249	0.023	0
Chpt1	0	0.269565	0.702	0.246	0
Metrn	0	0.268671	0.344	0.069	0
Coa6	0	0.268643	0.588	0.18	0
Ppih	0	0.268466	0.356	0.069	0
Tbrg4	0	0.267727	0.276	0.028	0
Hp	0	0.267485	0.41	0.095	0
Impdh1	0	0.266848	0.323	0.073	0
Tex30	0	0.266669	0.318	0.049	0
Nampt	0	0.265915	0.54	0.173	0
Pop7	0	0.26569	0.47	0.119	0
Supt16	0	0.264862	0.521	0.138	0
Bcl2l13	0	0.264674	0.318	0.057	0
Ncapd3	0	0.264556	0.286	0.042	0
Dars	0	0.26448	0.546	0.16	0
Nomo1	0	0.264403	0.38	0.08	0
Tcerg1	0	0.264384	0.514	0.148	0
Abcf2	0	0.264224	0.407	0.094	0
Crat	0	0.26368	0.376	0.083	0
Cox11	0	0.263596	0.323	0.058	0
Kif22	0	0.263208	0.229	0.024	0
Sgo2a	0	0.263025	0.223	0.02	0
Nsd2	0	0.26272	0.346	0.072	0
Imp4	0	0.262019	0.483	0.123	0
Mccc2	0	0.261498	0.336	0.062	0
Mgat4b	0	0.260804	0.58	0.187	0
Dis3	0	0.259889	0.3	0.046	0
Cenpu	0	0.259393	0.208	0.012	0
Cenpk	0	0.259269	0.231	0.021	0
Nfs1	0	0.258794	0.491	0.127	0
Gins4	0	0.258342	0.434	0.117	0
Carnmt1	0	0.258309	0.513	0.154	0
Ddx56	0	0.258078	0.392	0.091	0
Pfdn4	0	0.257364	0.585	0.193	0
Lonp1	0	0.256378	0.408	0.102	0
Ubqln1	0	0.255355	0.503	0.144	0
Dnm1l	0	0.255245	0.403	0.104	0
Usp10	0	0.255169	0.325	0.056	0
N4bp2l1	0	0.255165	0.335	0.06	0
Rfc3	0	0.254711	0.266	0.043	0
Blcap	0	0.254631	0.436	0.116	0
Rbmx	0	0.254616	0.402	0.099	0
Rrp15	0	0.254353	0.454	0.12	0
Gpaa1	0	0.254171	0.434	0.114	0
Pex19	0	0.253939	0.551	0.169	0
Ndufaf1	0	0.253619	0.319	0.063	0
Prpf31	0	0.253352	0.388	0.087	0
Gabpa	0	0.253045	0.341	0.079	0
Bub1b	0	0.252447	0.221	0.018	0
Gsr	0	0.252198	0.446	0.118	0
Arl6ip6	0	0.250846	0.37	0.087	0
Cse1l	0	0.250628	0.303	0.049	0
Dbf4	0	0.250471	0.224	0.026	0
Ankef1	0	0.249729	0.247	0.026	0
Wbp11	0	0.249256	0.475	0.128	0
Ddx27	0	0.249178	0.389	0.086	0
Rbpms2	0	0.249129	0.216	0.018	0
Nol8	0	0.248416	0.341	0.068	0
Rae1	0	0.248062	0.499	0.144	0
Nup50	0	0.247866	0.374	0.082	0
Fam53b	0	0.2477	0.341	0.075	0
Srrt	0	0.247503	0.481	0.135	0
Supv3l1	0	0.246421	0.248	0.026	0
Mis18bp1	0	0.246304	0.204	0.016	0
Eif2s3x	0	0.24603	0.487	0.134	0
Rad51	0	0.245851	0.205	0.015	0
Clpb	0	0.245402	0.375	0.077	0
Smim26	0	0.245245	0.437	0.121	0
Dtl	0	0.24519	0.209	0.019	0
L2hgdh	0	0.244786	0.221	0.017	0
Psmg3	0	0.244616	0.476	0.134	0
Nusap1	0	0.24447	0.208	0.022	0
Kif20b	0	0.24416	0.215	0.022	0
Isy1	0	0.243722	0.43	0.113	0
Utp14a	0	0.243394	0.351	0.08	0
Prmt7	0	0.243216	0.356	0.075	0
Lias	0	0.242837	0.38	0.089	0
Rmnd1	0	0.242204	0.326	0.062	0
Mycbp	0	0.242007	0.372	0.077	0
Cenpn	0	0.241912	0.217	0.019	0
Mcph1	0	0.241867	0.225	0.023	0
Suclg2	0	0.241635	0.462	0.129	0
Cdca7l	0	0.241559	0.216	0.016	0
Haus1	0	0.241216	0.311	0.058	0
Otud6b	0	0.241137	0.318	0.06	0
Nubp1	0	0.240872	0.443	0.111	0
Tbl3	0	0.240712	0.324	0.06	0
Prmt5	0	0.239906	0.343	0.069	0
Mtap	0	0.239538	0.39	0.097	0
Cenph	0	0.239507	0.212	0.016	0
Car5b	0	0.239289	0.222	0.02	0
Noa1	0	0.23893	0.293	0.048	0
Cenps	0	0.238459	0.224	0.02	0
Ctps	0	0.237683	0.341	0.062	0
Umps	0	0.237522	0.349	0.074	0
Rmdn3	0	0.236718	0.353	0.071	0
Elac2	0	0.235657	0.296	0.044	0
Ivd	0	0.235229	0.354	0.073	0
Clpx	0	0.235021	0.403	0.105	0
Rnf4	0	0.23495	0.561	0.179	0
Pola1	0	0.234766	0.252	0.033	0
Kif20a	0	0.233972	0.213	0.025	0
Mcat	0	0.233804	0.313	0.061	0
Myg1	0	0.233635	0.467	0.133	0
Upf3b	0	0.232851	0.373	0.087	0
Xpo1	0	0.232379	0.433	0.108	0
Nuf2	0	0.232114	0.214	0.022	0
Fem1a	0	0.231884	0.276	0.043	0
Naa25	0	0.231083	0.297	0.052	0
Vrk1	0	0.229495	0.277	0.045	0
Nit2	0	0.229458	0.492	0.145	0
Yrdc	0	0.229115	0.435	0.11	0
Pstk	0	0.22862	0.44	0.118	0
Ppat	0	0.225941	0.246	0.028	0
Bcs1l	0	0.225477	0.285	0.049	0
2610507B11Rik	0	0.22483	0.529	0.162	0
Seh1l	0	0.224563	0.4	0.105	0
Tfb2m	0	0.223609	0.345	0.071	0
Rpf2	0	0.221988	0.336	0.072	0
Aasdhppt	0	0.221353	0.413	0.107	0
Slc16a10	0	0.220455	0.233	0.029	0
Slc25a46	0	0.220158	0.415	0.11	0
Zmynd19	0	0.218854	0.27	0.049	0
Tefm	0	0.218627	0.246	0.038	0
Ubqln4	0	0.218401	0.279	0.046	0
Ipo9	0	0.218207	0.372	0.089	0
Lactb	0	0.217927	0.285	0.057	0
Utp4	0	0.216221	0.297	0.057	0
Farsa	0	0.21529	0.347	0.08	0
Bud23	0	0.215034	0.396	0.102	0
Narfl	0	0.214897	0.227	0.035	0
Rpp40	0	0.213787	0.238	0.032	0
Tamm41	0	0.213505	0.272	0.045	0
Pgam5	0	0.211862	0.295	0.052	0
Acad9	0	0.211334	0.256	0.043	0
Mrs2	0	0.211239	0.232	0.04	0
Plk4	0	0.210526	0.243	0.036	0
Tars2	0	0.209623	0.251	0.038	0
Rbm28	0	0.209621	0.443	0.123	0
Etv3	0	0.209531	0.294	0.06	0
Bag4	0	0.208345	0.309	0.063	0
Mtg1	0	0.208123	0.252	0.044	0
Coasy	0	0.208007	0.364	0.085	0
Ints10	0	0.207733	0.29	0.06	0
Pus7	0	0.206977	0.25	0.04	0
Timeless	0	0.20452	0.218	0.033	0
Lag3	0	0.204294	0.215	0.033	0
Ccdc86	0	0.204073	0.282	0.055	0
Xrcc6	0	0.204044	0.283	0.055	0
Aen	0	0.201867	0.32	0.069	0
Nt5m	1.00844e-307	0.224057	0.362	0.089	1.87812e-303
Srsf3	1.43422e-307	0.553511	0.832	0.461	2.67108e-303
Rpl11	1.4537e-307	0.457018	0.986	0.809	2.70737e-303
Taf15	1.45503e-307	0.217098	0.411	0.11	2.70985e-303
Impdh2	1.83244e-307	0.464605	0.783	0.366	3.41274e-303
Rps5	3.40507e-307	0.442914	0.989	0.859	6.3416e-303
Sncg	1.32525e-306	0.224907	0.208	0.033	2.46814e-302
Tmem183a	4.26535e-306	0.232163	0.434	0.12	7.94379e-302
Arfrp1	5.04823e-306	0.210401	0.5	0.15	9.40182e-302
Aggf1	3.15116e-305	0.261503	0.49	0.147	5.86871e-301
Cd3eap	5.35216e-305	0.208507	0.32	0.073	9.96786e-301
Ppt2	1.51515e-304	0.208066	0.347	0.084	2.82182e-300
Cops6	2.04347e-304	0.38223	0.845	0.384	3.80575e-300
Pdk4	2.17324e-304	0.32255	0.264	0.053	4.04743e-300
Nup88	5.95481e-304	0.222599	0.325	0.075	1.10902e-299
Nsmce4a	8.95505e-304	0.31294	0.647	0.237	1.66779e-299
Psmd2	4.58164e-303	0.284393	0.725	0.274	8.53284e-299
Emb	6.44865e-302	0.266467	0.21	0.034	1.201e-297
Grhpr	2.68563e-301	0.243923	0.392	0.104	5.00172e-297
Apool	2.91065e-301	0.212778	0.359	0.089	5.4208e-297
Rpia	3.07314e-301	0.231368	0.471	0.138	5.72341e-297
Hprt	5.46385e-301	0.277327	0.624	0.218	1.01759e-296
1700020I14Rik	5.87068e-301	0.301599	0.732	0.284	1.09336e-296
Nudc	1.23594e-300	0.449712	0.796	0.376	2.30181e-296
Cbx5	1.59617e-300	0.29612	0.594	0.206	2.97272e-296
Nfu1	1.84505e-300	0.27826	0.67	0.244	3.43623e-296
Bri3bp	1.05196e-299	0.216943	0.402	0.107	1.95916e-295
Acyp2	1.61134e-299	0.225584	0.528	0.167	3.00096e-295
Nudt2	6.58349e-299	0.214561	0.444	0.126	1.22611e-294
Wdr6	6.96441e-299	0.225826	0.226	0.04	1.29705e-294
Snhg6	1.20987e-298	0.330974	0.646	0.242	2.25326e-294
Pole4	2.4358e-298	0.27621	0.667	0.243	4.53644e-294
Psmg2	9.87623e-298	0.214352	0.434	0.123	1.83935e-293
Tmem126a	1.19564e-297	0.316114	0.741	0.294	2.22676e-293
Lonp2	2.04012e-297	0.261803	0.46	0.136	3.79953e-293
Tmem135	1.54208e-296	0.226084	0.322	0.075	2.87198e-292
Dap3	2.65785e-296	0.256984	0.596	0.203	4.94998e-292
Mgll	3.05545e-296	0.268971	0.584	0.201	5.69047e-292
Mrps24	1.91379e-295	0.457027	0.895	0.505	3.56424e-291
Serhl	2.16524e-295	0.238308	0.358	0.09	4.03254e-291
Cenpx	2.20248e-295	0.325887	0.797	0.336	4.10189e-291
Clns1a	2.31493e-295	0.279263	0.606	0.212	4.31133e-291
Srsf4	8.44779e-295	0.206674	0.446	0.127	1.57332e-290
Cops5	1.16767e-294	0.240614	0.627	0.219	2.17467e-290
Gps1	2.62934e-294	0.298202	0.633	0.23	4.89688e-290
Fam216a	3.08892e-293	0.210106	0.419	0.116	5.75281e-289
Prpf4b	3.16192e-293	0.226143	0.561	0.184	5.88875e-289
Psmd6	5.45757e-293	0.301691	0.748	0.304	1.01642e-288
Mocs2	1.81615e-292	0.360712	0.769	0.325	3.3824e-288
Thoc6	2.41916e-292	0.223909	0.42	0.118	4.50544e-288
Nudt21	3.36308e-292	0.318112	0.726	0.288	6.2634e-288
Twistnb	3.78853e-292	0.238003	0.529	0.17	7.05576e-288
Timm8b	2.55958e-291	0.432161	0.833	0.406	4.76696e-287
N6amt1	5.51854e-291	0.225861	0.41	0.113	1.02777e-286
Gars	1.00264e-290	0.286877	0.633	0.226	1.86731e-286
Snrnp40	1.40138e-290	0.239927	0.451	0.133	2.60993e-286
Vdac3	2.58517e-290	0.434898	0.86	0.465	4.81462e-286
Ncbp2	2.84373e-290	0.240922	0.544	0.176	5.29615e-286
Sco2	3.83339e-290	0.228252	0.341	0.084	7.13931e-286
Med29	6.14471e-289	0.224392	0.545	0.177	1.14439e-284
Nxt1	7.01997e-289	0.264033	0.442	0.13	1.3074e-284
Akt1s1	1.25639e-288	0.264353	0.614	0.218	2.3399e-284
Pdk2	2.68625e-288	0.207945	0.271	0.057	5.00287e-284
Nup85	6.92432e-288	0.221602	0.308	0.071	1.28959e-283
Zfp706	1.80744e-287	0.395956	0.848	0.419	3.36618e-283
Eif3c	2.10251e-287	0.381762	0.867	0.421	3.91571e-283
Cnih4	3.05938e-287	0.335184	0.774	0.334	5.69779e-283
Polr2m	5.6362e-287	0.279337	0.732	0.288	1.04969e-282
Xrn2	9.06926e-287	0.22878	0.559	0.185	1.68906e-282
Yars	9.81733e-287	0.226715	0.371	0.098	1.82838e-282
Psmd1	1.54097e-286	0.287482	0.623	0.226	2.8699e-282
Pak1ip1	4.97018e-286	0.218706	0.495	0.154	9.25646e-282
Csnk2b	9.38525e-286	0.265483	0.723	0.281	1.74791e-281
Bzw1	1.45904e-285	0.296456	0.792	0.328	2.71731e-281
Ltv1	2.9631e-285	0.200714	0.343	0.085	5.51848e-281
Fbxl6	1.65568e-284	0.207708	0.379	0.101	3.08354e-280
Purb	1.88785e-284	0.225522	0.574	0.194	3.51594e-280
Dnajc21	9.43286e-284	0.233892	0.496	0.155	1.75678e-279
Plin4	1.13918e-283	0.248739	0.322	0.078	2.12161e-279
Trnt1	1.64163e-283	0.219109	0.437	0.128	3.05737e-279
Fam96b	2.06283e-283	0.298168	0.725	0.286	3.84182e-279
Ptdss2	4.90495e-283	0.217107	0.404	0.112	9.13498e-279
Hsdl2	1.95872e-282	0.227434	0.394	0.109	3.64792e-278
Pex6	2.18189e-282	0.215047	0.337	0.084	4.06355e-278
Rars	2.73962e-282	0.207038	0.38	0.102	5.10226e-278
Psmc4	9.28777e-281	0.272074	0.744	0.3	1.72975e-276
Coq2	9.77744e-281	0.207318	0.615	0.217	1.82095e-276
Prpf40a	1.40037e-280	0.322178	0.74	0.306	2.60805e-276
Tuba1b	1.83595e-280	0.680602	0.823	0.534	3.41928e-276
Chchd7	3.60979e-280	0.265451	0.578	0.201	6.72287e-276
Pcyt2	5.54843e-280	0.238763	0.339	0.085	1.03334e-275
Hoxa5	6.07491e-280	0.228235	0.407	0.115	1.13139e-275
Pmm1	9.95053e-280	0.208511	0.656	0.238	1.85319e-275
H2afy	1.65199e-279	0.314455	0.728	0.298	3.07667e-275
Ndufaf8	2.79714e-279	0.266173	0.686	0.267	5.20939e-275
Rgs19	6.75405e-279	0.214908	0.353	0.092	1.25787e-274
Nln	1.76648e-278	0.216097	0.33	0.082	3.28989e-274
Lage3	2.90343e-277	0.272711	0.71	0.278	5.40736e-273
Mtif2	6.0103e-277	0.220689	0.334	0.084	1.11936e-272
Ndufa2	8.30822e-277	0.487294	0.93	0.63	1.54732e-272
Memo1	2.81831e-275	0.201338	0.368	0.098	5.24883e-271
Etf1	1.66345e-274	0.243325	0.636	0.235	3.098e-270
Atxn2	2.47594e-274	0.225987	0.419	0.122	4.61118e-270
Cox17	5.93487e-274	0.236004	0.502	0.166	1.10531e-269
Rpl4	1.35182e-273	0.46634	0.969	0.827	2.51763e-269
Polr2h	5.81782e-273	0.202026	0.518	0.168	1.08351e-268
Psmd13	8.75477e-273	0.288378	0.707	0.28	1.63049e-268
Uri1	9.77869e-273	0.220935	0.481	0.151	1.82118e-268
Pxmp4	2.87459e-272	0.220127	0.422	0.123	5.35364e-268
U2af2	3.16155e-272	0.207246	0.519	0.17	5.88806e-268
Ncaph2	4.86755e-272	0.227107	0.481	0.152	9.06533e-268
Hsd17b4	1.43125e-271	0.206123	0.478	0.15	2.66556e-267
Taf10	1.5313e-271	0.307797	0.785	0.336	2.85189e-267
Adss	4.95749e-271	0.20726	0.51	0.165	9.23282e-267
Hnrnpm	5.58535e-271	0.233679	0.677	0.26	1.04022e-266
Sod1	1.76847e-269	0.312586	0.806	0.373	3.29361e-265
Prpf19	1.91336e-269	0.226799	0.566	0.195	3.56344e-265
Fbxo9	2.45511e-269	0.204409	0.444	0.133	4.5724e-265
Ntmt1	3.89705e-269	0.216497	0.516	0.169	7.25787e-265
Zfp207	4.25865e-269	0.237465	0.654	0.245	7.93131e-265
Eif3a	7.22446e-269	0.396877	0.88	0.47	1.34548e-264
Mapkapk2	1.81984e-268	0.239164	0.411	0.12	3.38927e-264
Psma6	3.48576e-268	0.374607	0.821	0.401	6.49187e-264
Trp53	3.67711e-268	0.274066	0.653	0.247	6.84824e-264
Snrpd2	9.99213e-268	0.409312	0.902	0.528	1.86093e-263
Dhx15	1.62315e-267	0.204782	0.482	0.153	3.02295e-263
Zranb2	8.45874e-267	0.219051	0.599	0.214	1.57536e-262
Maz	1.52336e-266	0.217961	0.456	0.142	2.8371e-262
Chp1	2.20808e-266	0.276906	0.699	0.278	4.11232e-262
Rpl5	3.46699e-266	0.455279	0.961	0.741	6.45692e-262
Srsf2	4.75288e-266	0.498829	0.805	0.456	8.85177e-262
Gpat4	1.25186e-265	0.225833	0.441	0.135	2.33147e-261
Sae1	4.95163e-265	0.263017	0.595	0.218	9.22192e-261
Exosc1	5.01554e-265	0.200506	0.45	0.138	9.34095e-261
Alas1	6.3607e-265	0.240411	0.5	0.165	1.18462e-260
Cdip1	1.04711e-264	0.204044	0.373	0.103	1.95014e-260
Psmd14	1.58419e-263	0.210805	0.616	0.225	2.95039e-259
Rbbp7	5.42149e-262	0.352721	0.809	0.386	1.0097e-257
Naa38	8.26628e-261	0.315922	0.748	0.319	1.53951e-256
Ndufaf2	9.23475e-261	0.209571	0.47	0.15	1.71988e-256
Ewsr1	4.28097e-260	0.261862	0.733	0.31	7.97288e-256
Polr2e	2.44488e-259	0.283834	0.802	0.354	4.55335e-255
Clptm1	5.84985e-258	0.224514	0.608	0.222	1.08948e-253
Smim20	1.32968e-257	0.230914	0.638	0.24	2.4764e-253
Rnaseh2b	1.54474e-257	0.205291	0.354	0.096	2.87693e-253
Hebp1	1.87516e-257	0.251867	0.629	0.237	3.4923e-253
Tmem259	3.63387e-257	0.204677	0.43	0.13	6.76771e-253
Nono	5.20271e-257	0.276639	0.725	0.302	9.68952e-253
Ruvbl1	8.25426e-257	0.218585	0.453	0.144	1.53727e-252
Mbd3	1.07589e-256	0.327221	0.779	0.348	2.00373e-252
Dmac1	2.57261e-256	0.246235	0.679	0.268	4.79124e-252
Abcd3	3.60758e-255	0.221518	0.435	0.134	6.71876e-251
Smarca5	7.75097e-255	0.278545	0.719	0.296	1.44354e-250
Eif4e2	5.07981e-254	0.286197	0.776	0.336	9.46063e-250
Oxct1	9.00287e-254	0.268549	0.767	0.326	1.67669e-249
Rbmxl1	2.61996e-252	0.200133	0.357	0.099	4.87942e-248
Ubl4a	1.94289e-250	0.20162	0.638	0.239	3.61843e-246
Rpl36	6.37814e-250	0.461611	0.987	0.796	1.18786e-245
Pigyl	2.69931e-249	0.204926	0.623	0.233	5.02719e-245
Slirp	2.78658e-248	0.310702	0.781	0.365	5.18973e-244
Ybx3	9.43237e-247	0.408495	0.883	0.506	1.75668e-242
Nap1l1	2.46337e-246	0.497686	0.846	0.513	4.58777e-242
Akt2	5.47147e-246	0.207723	0.579	0.211	1.01901e-241
Gamt	7.89067e-246	0.221859	0.46	0.149	1.46956e-241
Gtf2a2	1.00515e-245	0.290824	0.78	0.355	1.87198e-241
Sbno1	2.56495e-245	0.201221	0.527	0.183	4.77697e-241
Cebpz	1.10324e-244	0.204557	0.481	0.161	2.05467e-240
Psma3	1.73001e-243	0.428784	0.924	0.613	3.22197e-239
Mlf2	2.18903e-243	0.336678	0.867	0.438	4.07685e-239
Btbd1	2.91975e-242	0.203327	0.586	0.216	5.43774e-238
Aimp1	4.72137e-241	0.236575	0.698	0.286	8.79309e-237
Thrsp	2.03116e-240	0.406634	0.315	0.093	3.78283e-236
Mtfr1l	1.31442e-239	0.217299	0.618	0.237	2.44798e-235
Cebpg	2.45705e-239	0.214925	0.636	0.245	4.57601e-235
Slbp	3.5503e-239	0.239214	0.585	0.221	6.61208e-235
Mrpl54	9.53513e-239	0.316537	0.849	0.413	1.77582e-234
Cmc1	1.22427e-238	0.20644	0.524	0.186	2.28009e-234
Mcts1	2.46177e-238	0.2157	0.634	0.246	4.58481e-234
Ptbp1	4.34464e-237	0.207785	0.555	0.201	8.09147e-233
Rbm17	4.86601e-237	0.241187	0.654	0.26	9.06245e-233
Smc1a	1.97537e-236	0.276616	0.757	0.339	3.67893e-232
Ddx18	3.07527e-236	0.212219	0.449	0.148	5.72738e-232
Eif4h	3.8689e-236	0.308114	0.794	0.381	7.20544e-232
Ube2l3	4.41019e-235	0.302927	0.823	0.397	8.21355e-231
2022-03-02	4.84266e-235	0.292126	0.802	0.379	9.01897e-231
Carhsp1	4.95369e-235	0.266321	0.81	0.369	9.22576e-231
Txnl1	4.1534e-234	0.286639	0.758	0.343	7.73529e-230
Mrpl27	4.68208e-234	0.250105	0.775	0.343	8.71991e-230
Prdx2	3.80172e-233	0.402894	0.938	0.634	7.08033e-229
Eif2s2	8.3073e-233	0.365962	0.868	0.485	1.54715e-228
Ninj1	4.86352e-232	0.271357	0.407	0.13	9.05783e-228
Psme2	1.9184e-231	0.354553	0.889	0.494	3.57282e-227
Trib1	4.27698e-231	0.222448	0.361	0.107	7.96545e-227
Sub1	1.80776e-230	0.383217	0.837	0.475	3.36677e-226
Eloc	2.20839e-230	0.309532	0.852	0.451	4.1129e-226
Rpl23	8.14521e-230	0.361198	0.994	0.846	1.51696e-225
Elavl1	8.80221e-230	0.209213	0.605	0.234	1.63932e-225
Galk1	6.82014e-229	0.245118	0.595	0.229	1.27018e-224
Rps18	2.00358e-228	0.430656	0.986	0.825	3.73147e-224
Zcrb1	7.82378e-228	0.265581	0.806	0.382	1.4571e-223
Cox7a2l	4.73199e-227	0.440831	0.937	0.659	8.81285e-223
Psma4	5.67559e-227	0.403587	0.882	0.554	1.05702e-222
Uba1	5.37004e-226	0.213691	0.616	0.242	1.00012e-221
1810022K09Rik	5.60092e-225	0.239009	0.622	0.253	1.04311e-220
Higd2a	1.53905e-224	0.326241	0.777	0.372	2.86632e-220
Bola2	1.69732e-224	0.203793	0.612	0.242	3.16109e-220
Pepd	1.00734e-223	0.22595	0.366	0.111	1.87607e-219
Wdr83os	1.08936e-223	0.224435	0.746	0.327	2.02882e-219
Rps19	1.47143e-223	0.377541	0.991	0.855	2.74039e-219
Ddx24	3.23663e-223	0.260528	0.779	0.357	6.0279e-219
Eif4e	3.39973e-223	0.203866	0.729	0.313	6.33165e-219
Psmd7	1.49556e-222	0.366915	0.875	0.499	2.78532e-218
Rpl7a	2.61165e-220	0.353444	0.909	0.553	4.86394e-216
Snrpc	6.49605e-218	0.234546	0.773	0.351	1.20982e-213
Emc2	1.8515e-217	0.211428	0.633	0.259	3.44823e-213
Fam104a	7.11304e-216	0.246777	0.794	0.368	1.32473e-211
Polr2c	6.28673e-214	0.201184	0.694	0.294	1.17084e-209
Mrpl14	1.11603e-213	0.257648	0.821	0.404	2.0785e-209
Acaa2	2.00704e-213	0.589842	0.746	0.416	3.7379e-209
Cisd2	6.23033e-213	0.221206	0.752	0.337	1.16034e-208
Pfdn2	2.50406e-212	0.277046	0.824	0.429	4.66357e-208
Psma2	4.5463e-211	0.369063	0.889	0.565	8.46702e-207
Hmgb1	1.54698e-209	0.408343	0.861	0.538	2.88109e-205
Psmd4	5.62373e-209	0.2774	0.826	0.422	1.04736e-204
Eef1d	7.6247e-209	0.408931	0.911	0.649	1.42002e-204
Ssu72	2.69645e-208	0.205056	0.757	0.339	5.02187e-204
Rps25	9.95657e-208	0.392185	0.98	0.789	1.85431e-203
Rpl26	1.2855e-207	0.366671	0.986	0.823	2.39411e-203
Srsf6	1.62498e-207	0.241611	0.76	0.363	3.02637e-203
Hnrnpr	3.59782e-207	0.211635	0.691	0.299	6.70057e-203
Spg21	6.00346e-207	0.224844	0.696	0.305	1.11808e-202
Polr2f	1.32972e-206	0.301088	0.841	0.453	2.47647e-202
Psma7	2.45898e-205	0.384472	0.909	0.623	4.5796e-201
Cenpb	2.98401e-205	0.219358	0.663	0.281	5.55742e-201
Lamtor1	7.74889e-203	0.245672	0.821	0.401	1.44315e-198
Arpp19	4.26423e-202	0.252209	0.806	0.412	7.9417e-198
Hnrnpa3	2.11453e-201	0.310707	0.806	0.442	3.93809e-197
Pik3r1	2.38458e-201	0.220281	0.69	0.307	4.44105e-197
Mlec	2.2119e-198	0.214848	0.789	0.367	4.11945e-194
Dcun1d5	1.29933e-197	0.221181	0.791	0.378	2.41987e-193
Smdt1	2.62655e-196	0.378672	0.908	0.615	4.89168e-192
Pck1	2.45067e-195	0.272981	0.215	0.052	4.56412e-191
Ywhae	8.63513e-195	0.357828	0.907	0.604	1.60821e-190
Pkm	1.03977e-194	0.340563	0.824	0.499	1.93647e-190
Rpl36al	1.11136e-194	0.233342	0.68	0.313	2.0698e-190
Canx	1.2287e-194	0.290475	0.92	0.557	2.28833e-190
Ube2n	7.13996e-194	0.240619	0.768	0.371	1.32975e-189
Lsm7	1.42006e-193	0.232348	0.698	0.33	2.64472e-189
Sugt1	8.44105e-193	0.212913	0.703	0.317	1.57206e-188
Cdc37	1.04231e-192	0.266684	0.819	0.427	1.9412e-188
Elof1	2.79344e-192	0.211752	0.752	0.344	5.2025e-188
H3f3a	2.48789e-191	0.373008	0.952	0.718	4.63345e-187
Sfpq	9.40593e-191	0.267646	0.769	0.385	1.75176e-186
Smc3	1.044e-190	0.205189	0.686	0.307	1.94435e-186
Rps7	4.62455e-190	0.34217	0.978	0.824	8.61277e-186
Srrm1	6.03317e-190	0.249227	0.775	0.381	1.12362e-185
Cwc15	1.21094e-189	0.227497	0.76	0.37	2.25525e-185
Eif3m	6.2086e-187	0.30018	0.798	0.443	1.15629e-182
Pdcd5	7.14967e-187	0.257318	0.852	0.464	1.33155e-182
Sumo2	7.23742e-185	0.419165	0.905	0.694	1.3479e-180
Pcbp1	1.68933e-183	0.32351	0.86	0.533	3.1462e-179
Ndufa13	6.92545e-183	0.408289	0.931	0.686	1.2898e-178
Rps21	5.92064e-181	0.348368	0.963	0.716	1.10266e-176
Ubxn1	3.35992e-180	0.240339	0.86	0.479	6.25751e-176
Idh1	4.64898e-176	0.201258	0.793	0.383	8.65826e-172
Eny2	1.01971e-175	0.233169	0.815	0.44	1.8991e-171
Rplp1	1.60611e-175	0.35683	0.983	0.778	2.99122e-171
Lpl	2.25047e-175	0.297022	0.966	0.631	4.19128e-171
Rps3a1	1.70175e-174	0.308785	0.981	0.859	3.16934e-170
Nedd8	6.63356e-170	0.308079	0.88	0.58	1.23543e-165
Anp32a	1.05715e-169	0.275785	0.729	0.397	1.96883e-165
Rps15	1.34118e-167	0.314918	0.985	0.789	2.49781e-163
Rbm25	3.4743e-165	0.20368	0.803	0.413	6.47053e-161
Tma7	2.99775e-161	0.281476	0.903	0.59	5.583e-157
Rpl31	6.55656e-160	0.339849	0.975	0.788	1.22109e-155
Ube2i	1.10344e-157	0.227767	0.816	0.443	2.05505e-153
Macf1	1.55861e-157	0.21079	0.633	0.288	2.90275e-153
Atp5e	4.19732e-156	0.329963	0.91	0.639	7.81709e-152
Rps23	2.70725e-153	0.292812	0.991	0.886	5.04198e-149
Ssb	2.71278e-152	0.284474	0.849	0.529	5.05229e-148
Rpl30	1.97761e-151	0.271273	0.976	0.773	3.68309e-147
Ndufv3	7.05989e-151	0.322111	0.853	0.538	1.31483e-146
Rnf7	6.16281e-149	0.202372	0.835	0.47	1.14776e-144
Eif3k	1.41347e-146	0.267887	0.923	0.643	2.63245e-142
Tubb5	1.52926e-146	0.629033	0.682	0.477	2.8481e-142
Rpl23a	1.34996e-144	0.275627	0.99	0.86	2.51417e-140
Arl6ip1	1.31585e-135	0.4032	0.82	0.512	2.45064e-131
Rexo2	1.35804e-134	0.244352	0.884	0.578	2.52921e-130
Rpl13	1.69326e-134	0.262396	0.986	0.886	3.15352e-130
Psmb4	6.21846e-131	0.238005	0.836	0.526	1.15813e-126
Hnrnpk	1.61823e-128	0.256386	0.897	0.63	3.01379e-124
Rbm3	7.36536e-126	0.286337	0.856	0.584	1.37173e-121
Ech1	1.20192e-124	0.251376	0.807	0.531	2.23845e-120
Rps15a	2.18951e-122	0.280161	0.984	0.847	4.07774e-118
Rpl22	2.98815e-119	0.243447	0.95	0.73	5.56513e-115
Eef2	8.97159e-115	0.249598	0.954	0.731	1.67087e-110
Rpl39	4.54195e-114	0.314836	0.979	0.801	8.45893e-110
Edf1	1.19624e-113	0.233096	0.907	0.65	2.22788e-109
Rpl41	2.88105e-107	0.272244	0.983	0.775	5.36567e-103
Mrfap1	2.67718e-99	0.226382	0.917	0.668	4.98597e-95
Prdx1	7.32685e-97	0.242479	0.896	0.704	1.36455e-92
Ucp1	5.47767e-96	1.46284	0.221	0.093	1.02016e-91
Rpl17	1.97574e-90	0.218538	0.977	0.833	3.67961e-86
Rps4x	1.54148e-84	0.202432	0.973	0.846	2.87084e-80
Rps26	2.61526e-83	0.216676	0.966	0.76	4.87066e-79
Rpl34	4.48326e-72	0.200634	0.979	0.833	8.34962e-68
Gpx8	1.41695e-58	0.297794	0.768	0.64	2.63892e-54

## Sheet: ProlifNondiff
	p_val	avg_logFC	pct.1	pct.2	p_val_adj
Stmn1	0	2.22423	0.889	0.136	0
H2afz	0	1.97502	0.974	0.448	0
Cks2	0	1.87598	0.81	0.145	0
Cenpa	0	1.80094	0.617	0.073	0
Birc5	0	1.69556	0.765	0.078	0
Hmgb2	0	1.64293	0.835	0.2	0
Tubb5	0	1.625	0.908	0.47	0
Cenpf	0	1.61408	0.581	0.041	0
Pclaf	0	1.61195	0.761	0.071	0
Ube2c	0	1.59447	0.561	0.057	0
Top2a	0	1.54966	0.592	0.054	0
Cdc20	0	1.50014	0.545	0.046	0
Ube2s	0	1.43254	0.915	0.492	0
Ccnb2	0	1.37345	0.567	0.065	0
Smc4	0	1.3524	0.788	0.178	0
Cdca3	0	1.33836	0.639	0.071	0
Mki67	0	1.31549	0.592	0.047	0
Smc2	0	1.30312	0.711	0.1	0
Timp1	0	1.30028	0.794	0.344	0
Tuba1b	0	1.29596	0.911	0.537	0
Prc1	0	1.29157	0.48	0.031	0
Cdk1	0	1.29088	0.564	0.064	0
Selenoh	0	1.25482	0.871	0.298	0
Cdca8	0	1.24231	0.596	0.045	0
Cenpe	0	1.23438	0.495	0.029	0
Hmmr	0	1.22827	0.513	0.033	0
Tubb6	0	1.21579	0.842	0.386	0
Tpx2	0	1.20067	0.55	0.038	0
H2afv	0	1.19257	0.892	0.517	0
Tk1	0	1.16704	0.628	0.068	0
Tagln2	0	1.11659	0.872	0.438	0
Knstrn	0	1.11585	0.52	0.048	0
Tmpo	0	1.11501	0.703	0.164	0
Ccna2	0	1.09652	0.521	0.04	0
H2afx	0	1.07907	0.565	0.118	0
Ran	0	1.07839	0.956	0.525	0
Ccnb1	0	1.05996	0.423	0.034	0
Cdkn3	0	1.05176	0.463	0.037	0
Cenpm	0	1.04635	0.61	0.071	0
Ptma	0	1.01296	0.964	0.697	0
Racgap1	0	1.00115	0.483	0.034	0
Mxd3	0	0.997252	0.448	0.022	0
Spc24	0	0.994018	0.542	0.057	0
Lockd	0	0.981882	0.449	0.047	0
Cks1b	0	0.973821	0.874	0.39	0
Ccdc34	0	0.971623	0.748	0.239	0
Tyms	0	0.966255	0.589	0.108	0
Nucks1	0	0.956345	0.861	0.421	0
Ckap4	0	0.95563	0.893	0.481	0
Dek	0	0.916274	0.798	0.343	0
Lgals1	0	0.903844	0.973	0.812	0
Spc25	0	0.901229	0.429	0.033	0
Pimreg	0	0.896128	0.404	0.037	0
Ckap2l	0	0.894365	0.425	0.024	0
Anp32b	0	0.869935	0.904	0.516	0
Lmnb1	0	0.865881	0.506	0.069	0
Anln	0	0.857481	0.417	0.033	0
Ranbp1	0	0.849208	0.892	0.527	0
Ckap2	0	0.827326	0.38	0.022	0
Tacc3	0	0.820011	0.432	0.035	0
Tnc	0	0.816484	0.318	0.054	0
Aspm	0	0.807887	0.338	0.022	0
Pbk	0	0.806474	0.379	0.034	0
Slfn9	0	0.790891	0.474	0.082	0
Hmgn2	0	0.772454	0.618	0.204	0
Plk1	0	0.750328	0.349	0.025	0
Pmf1	0	0.748009	0.514	0.09	0
Kif23	0	0.747157	0.338	0.014	0
Rrm1	0	0.746224	0.5	0.096	0
Kif22	0	0.742556	0.376	0.022	0
Rrm2	0	0.727917	0.426	0.061	0
Lsm2	0	0.724283	0.69	0.225	0
Nusap1	0	0.714323	0.308	0.022	0
Lig1	0	0.709252	0.396	0.064	0
Dnajc9	0	0.708644	0.528	0.118	0
Kif20b	0	0.698607	0.326	0.021	0
Knl1	0	0.677567	0.336	0.021	0
Gmnn	0	0.674247	0.419	0.066	0
Kif20a	0	0.671548	0.326	0.024	0
Gins2	0	0.670896	0.427	0.069	0
Nuf2	0	0.66108	0.324	0.021	0
Aurkb	0	0.650667	0.322	0.027	0
Diaph3	0	0.644854	0.333	0.022	0
Sgo2a	0	0.609485	0.32	0.021	0
Rangap1	0	0.597523	0.423	0.092	0
Cenpq	0	0.591371	0.331	0.033	0
Mad2l1	0	0.587252	0.355	0.043	0
Atad2	0	0.586886	0.369	0.077	0
C330027C09Rik	0	0.575989	0.302	0.024	0
Aurka	0	0.572992	0.27	0.023	0
Esco2	0	0.569323	0.275	0.029	0
Depdc1a	0	0.56825	0.266	0.015	0
Tcf19	0	0.564712	0.326	0.047	0
Incenp	0	0.564375	0.295	0.036	0
Asf1b	0	0.562776	0.324	0.038	0
Kif11	0	0.561648	0.295	0.019	0
Cenpw	0	0.555997	0.371	0.062	0
Mis18bp1	0	0.555009	0.263	0.018	0
Rfc5	0	0.553179	0.395	0.067	0
Dbf4	0	0.539883	0.309	0.027	0
Plk4	0	0.535329	0.317	0.037	0
Kif2c	0	0.519235	0.248	0.014	0
Bub1b	0	0.512018	0.274	0.02	0
Clspn	0	0.503758	0.27	0.026	0
Mcm5	0	0.482055	0.287	0.046	0
Ncapg	0	0.475136	0.237	0.018	0
Dlgap5	0	0.467582	0.242	0.012	0
Mis18a	0	0.467175	0.338	0.053	0
Rad51ap1	0	0.462058	0.266	0.022	0
Arhgap11a	0	0.45916	0.228	0.019	0
Shcbp1	0	0.457334	0.242	0.017	0
Ect2	0	0.456643	0.223	0.016	0
Ska1	0	0.449007	0.236	0.013	0
Melk	0	0.448884	0.25	0.014	0
Nrm	0	0.438205	0.308	0.054	0
Ndc80	0	0.438065	0.215	0.01	0
Cep55	0	0.436673	0.213	0.011	0
Fen1	0	0.435559	0.259	0.037	0
Cenpn	0	0.426514	0.252	0.022	0
Ncapg2	0	0.425908	0.266	0.036	0
Cenph	0	0.420485	0.238	0.02	0
Cdca2	0	0.412975	0.218	0.017	0
Kif4	0	0.412126	0.225	0.014	0
Cit	0	0.41078	0.221	0.017	0
Kif15	0	0.402978	0.216	0.014	0
Trim59	0	0.398128	0.213	0.023	0
Ncapd2	0	0.39587	0.248	0.036	0
Bub1	0	0.382385	0.204	0.014	0
Cenpp	0	0.371524	0.221	0.026	0
Cenps	0	0.360087	0.216	0.026	0
Rad51	0	0.351403	0.208	0.02	0
Trip13	0	0.334019	0.201	0.021	0
Hells	4.24295e-307	0.453824	0.25	0.039	7.90207e-303
Cdkn2c	2.60265e-303	0.699847	0.448	0.119	4.84717e-299
Haus4	2.62929e-298	0.484192	0.325	0.066	4.89678e-294
Ppia	5.56443e-298	0.766715	0.96	0.756	1.03632e-293
Uhrf1	6.23727e-296	0.427079	0.258	0.042	1.16163e-291
Cenpk	7.26636e-294	0.338613	0.208	0.028	1.35329e-289
Calm2	2.65497e-289	1.01292	0.894	0.631	4.94462e-285
Rad18	2.75555e-289	0.296204	0.205	0.027	5.13194e-285
Anapc15	1.36254e-288	0.516576	0.384	0.091	2.53759e-284
Usp1	8.49947e-288	0.566263	0.539	0.166	1.58294e-283
Ska2	1.74373e-287	0.380199	0.242	0.038	3.24752e-283
Mcm3	5.67043e-286	0.496689	0.303	0.06	1.05606e-281
Rad21	4.77959e-285	0.670145	0.561	0.187	8.9015e-281
Alyref	2.45548e-284	0.629312	0.661	0.249	4.57308e-280
Chaf1a	1.62804e-283	0.378274	0.218	0.031	3.03207e-279
4930579G24Rik	3.29202e-283	0.397943	0.24	0.038	6.13105e-279
Ezh2	8.53782e-278	0.498275	0.372	0.089	1.59008e-273
Cdkn2d	3.03991e-277	0.80178	0.473	0.145	5.66153e-273
Nsd2	1.67809e-276	0.476461	0.351	0.079	3.12527e-272
Anp32e	3.647e-276	0.633818	0.592	0.211	6.79217e-272
Hmgb1	1.0093e-275	0.75436	0.888	0.545	1.87973e-271
Tubb4b	1.08071e-274	1.09034	0.748	0.368	2.01272e-270
Dut	2.01275e-273	0.672474	0.589	0.207	3.74854e-269
Lmna	6.22757e-272	0.869969	0.864	0.539	1.15982e-267
Prim1	4.53716e-268	0.38854	0.251	0.044	8.45e-264
Tpm4	1.62371e-265	0.777875	0.871	0.523	3.02399e-261
Ywhah	2.30734e-264	0.714598	0.768	0.373	4.2972e-260
Rfc2	3.16136e-263	0.528467	0.495	0.152	5.88772e-259
Bok	4.88303e-261	0.551122	0.387	0.099	9.09415e-257
Psip1	8.09275e-258	0.628126	0.699	0.297	1.50719e-253
Tpm2	1.15108e-255	0.78796	0.441	0.13	2.14376e-251
Hist1h1e	7.27468e-254	0.698871	0.273	0.054	1.35484e-249
Dhfr	3.45417e-253	0.439794	0.291	0.061	6.43304e-249
Mcm6	8.84419e-252	0.522484	0.338	0.08	1.64714e-247
Hmgb3	3.13356e-251	0.450749	0.413	0.111	5.83595e-247
Rpa2	1.53444e-245	0.483271	0.343	0.084	2.85774e-241
Ssrp1	7.83103e-245	0.613496	0.69	0.298	1.45845e-240
Jpt2	1.62038e-244	0.399118	0.312	0.07	3.01779e-240
Snrpd1	8.22782e-244	0.605523	0.751	0.346	1.53235e-239
Hjurp	5.34577e-239	0.519625	0.435	0.129	9.95596e-235
Mcm7	4.55835e-237	0.439115	0.332	0.081	8.48948e-233
Dtymk	5.84762e-237	0.561921	0.698	0.295	1.08906e-232
Rfc4	5.43992e-234	0.429343	0.32	0.076	1.01313e-229
Hirip3	1.79498e-232	0.374869	0.264	0.054	3.34297e-228
Acta2	2.18928e-231	1.04604	0.322	0.08	4.07731e-227
Hat1	6.39162e-226	0.471623	0.353	0.094	1.19037e-221
Lhfpl2	4.93746e-224	0.391046	0.264	0.055	9.19553e-220
Syce2	5.49302e-222	0.366318	0.244	0.049	1.02302e-217
Ndc1	1.0202e-216	0.332675	0.236	0.047	1.90003e-212
Cthrc1	9.02576e-213	0.894699	0.513	0.187	1.68096e-208
Pkmyt1	1.90644e-212	0.306698	0.201	0.035	3.55055e-208
Rbm3	3.50181e-210	0.675047	0.887	0.589	6.52177e-206
Clic1	2.62603e-209	0.684048	0.865	0.562	4.89073e-205
Hdgf	4.08008e-208	0.687388	0.801	0.447	7.59874e-204
H2-Q6	5.5026e-207	0.556359	0.441	0.147	1.0248e-202
Nxt1	8.22452e-206	0.479086	0.427	0.139	1.53173e-201
Reep4	1.13235e-204	0.409238	0.291	0.071	2.10888e-200
Topbp1	5.93514e-202	0.372873	0.29	0.071	1.10536e-197
Cfl1	6.62578e-202	0.621666	0.912	0.676	1.23399e-197
Nap1l1	6.37619e-201	0.57461	0.856	0.521	1.1875e-196
H2-Q7	1.31698e-200	0.811778	0.643	0.308	2.45274e-196
Lsm5	7.16171e-198	0.512582	0.612	0.262	1.3338e-193
Dnmt1	5.88042e-197	0.362581	0.271	0.064	1.09517e-192
Ripk3	1.57797e-196	0.38397	0.299	0.077	2.93882e-192
Tceal9	7.69806e-196	0.609802	0.907	0.641	1.43369e-191
Tuba1a	1.02395e-194	0.653887	0.931	0.68	1.907e-190
Mcm4	1.34707e-194	0.351663	0.249	0.055	2.50878e-190
Sae1	2.45771e-194	0.491933	0.565	0.229	4.57723e-190
Fam111a	1.4454e-192	0.45197	0.448	0.154	2.69192e-188
Cmc2	6.28332e-191	0.41114	0.491	0.177	1.1702e-186
Psmc3ip	9.26969e-191	0.322597	0.205	0.04	1.72639e-186
Sh3bgrl3	1.16439e-189	0.702485	0.843	0.554	2.16857e-185
Mcm2	2.71625e-189	0.322866	0.202	0.039	5.05874e-185
Rfc3	1.98003e-188	0.329568	0.232	0.05	3.68761e-184
Dctpp1	9.33797e-188	0.437658	0.538	0.204	1.7391e-183
Ckap5	1.26611e-187	0.413614	0.326	0.092	2.358e-183
Nt5dc2	1.59219e-185	0.451982	0.391	0.125	2.96529e-181
Pfn1	1.69355e-185	0.585271	0.921	0.725	3.15407e-181
Hnrnpab	9.78004e-185	0.536303	0.79	0.437	1.82144e-180
Ddx39	5.27462e-184	0.421975	0.419	0.14	9.82346e-180
Ncaph2	8.27241e-184	0.430864	0.455	0.161	1.54065e-179
Cdc25b	4.82946e-181	0.308247	0.205	0.041	8.99439e-177
Cdk5rap2	1.8682e-178	0.312419	0.231	0.051	3.47934e-174
Hist1h4i	3.25581e-178	0.317658	0.224	0.049	6.06362e-174
Ccl2	1.14266e-176	1.098	0.54	0.234	2.12809e-172
Rbbp8	1.13243e-173	0.312623	0.233	0.054	2.10903e-169
Pole3	1.94024e-172	0.416697	0.537	0.216	3.6135e-168
Exosc8	7.32161e-172	0.407308	0.44	0.157	1.36358e-167
Cxcl10	7.1006e-170	0.704896	0.467	0.175	1.32242e-165
Cald1	2.90481e-168	0.648146	0.896	0.677	5.40991e-164
Tuba1c	5.47453e-168	0.348629	0.247	0.061	1.01958e-163
Nudt21	9.69216e-167	0.463571	0.639	0.304	1.80507e-162
Hpf1	5.8802e-166	0.440635	0.496	0.197	1.09513e-161
Lsm3	1.40878e-164	0.434137	0.594	0.265	2.62371e-160
Hint1	1.58138e-163	0.537647	0.904	0.668	2.94516e-159
Gpsm2	1.91078e-163	0.321173	0.227	0.053	3.55864e-159
Tipin	3.74983e-161	0.450822	0.491	0.199	6.98369e-157
Vim	3.06848e-159	0.692332	0.946	0.826	5.71473e-155
Lsm8	5.33381e-156	0.431192	0.565	0.249	9.93368e-152
Bst2	8.51082e-156	0.67853	0.839	0.586	1.58506e-151
Gpx7	1.12666e-155	0.54489	0.848	0.559	2.09829e-151
Nasp	1.68415e-155	0.415862	0.459	0.179	3.13656e-151
Cdk4	4.54013e-153	0.505187	0.785	0.463	8.45554e-149
Ppil1	6.86011e-153	0.323942	0.355	0.118	1.27763e-148
Ncapd3	3.63806e-152	0.262297	0.216	0.052	6.77552e-148
Ssna1	4.94696e-152	0.446403	0.657	0.329	9.21322e-148
Nde1	5.52151e-152	0.349761	0.314	0.097	1.02833e-147
Arpin	3.93116e-151	0.318215	0.293	0.086	7.3214e-147
Nans	4.1203e-150	0.37738	0.53	0.226	7.67365e-146
Ybx1	2.22181e-149	0.494233	0.923	0.736	4.1379e-145
Acot7	5.59638e-149	0.356843	0.356	0.122	1.04227e-144
Haus8	2.61107e-148	0.283697	0.231	0.059	4.86286e-144
Sdc1	7.56209e-148	0.411361	0.378	0.135	1.40836e-143
Rpa1	3.71677e-147	0.31404	0.279	0.082	6.92212e-143
Cd44	6.75408e-147	0.502241	0.432	0.167	1.25788e-142
Nup37	1.53987e-146	0.300309	0.27	0.078	2.86786e-142
Bex3	2.05191e-146	0.385131	0.533	0.231	3.82148e-142
Rnaseh2c	2.88009e-146	0.395641	0.643	0.306	5.36388e-142
Hnrnpa1	6.80525e-146	0.493485	0.791	0.471	1.26741e-141
Siva1	7.10367e-145	0.49287	0.632	0.319	1.32299e-140
Actg1	5.59261e-144	0.758412	0.868	0.68	1.04157e-139
Kpnb1	5.93993e-144	0.365626	0.536	0.232	1.10625e-139
Mrpl18	1.6054e-143	0.390455	0.746	0.398	2.9899e-139
Pcna	3.201e-143	0.349163	0.281	0.085	5.96154e-139
Raly	4.26729e-143	0.437104	0.701	0.374	7.94739e-139
Larp7	7.3539e-143	0.329238	0.34	0.115	1.36959e-138
Pgp	2.39048e-142	0.422606	0.575	0.26	4.45202e-138
P4hb	5.91857e-142	0.503459	0.894	0.66	1.10227e-137
Srsf7	8.67732e-142	0.422933	0.658	0.337	1.61606e-137
Cntln	1.30975e-140	0.352935	0.384	0.138	2.43928e-136
Rpa3	8.78556e-140	0.401805	0.523	0.231	1.63622e-135
Lsm6	1.42828e-138	0.404829	0.667	0.345	2.66002e-134
Snrpe	1.86335e-138	0.460099	0.803	0.505	3.47031e-134
Calm1	4.09605e-138	0.59246	0.886	0.699	7.62847e-134
Eri1	5.4724e-137	0.28732	0.257	0.074	1.01918e-132
Naa50	9.65038e-137	0.424323	0.641	0.314	1.79729e-132
Cbx5	7.16657e-136	0.383366	0.509	0.22	1.3347e-131
Anapc11	3.16457e-135	0.457094	0.783	0.5	5.8937e-131
Lsm4	4.23622e-135	0.403724	0.778	0.445	7.88954e-131
Stub1	2.85835e-134	0.441905	0.792	0.5	5.32339e-130
Prelid1	7.70197e-134	0.494892	0.814	0.513	1.43442e-129
Gemin6	9.04714e-134	0.299126	0.272	0.083	1.68494e-129
Bub3	1.53834e-133	0.500584	0.56	0.277	2.865e-129
Rnaseh2b	1.18247e-132	0.30569	0.314	0.105	2.20224e-128
H3f3b	2.7458e-132	0.611825	0.88	0.677	5.11378e-128
Sf3b5	1.97123e-130	0.450654	0.785	0.492	3.67121e-126
Postn	6.02251e-130	0.474759	0.736	0.413	1.12163e-125
Terf1	9.66379e-129	0.307421	0.262	0.079	1.79978e-124
Hnrnpa3	4.1732e-128	0.422418	0.758	0.454	7.77217e-124
Ubald2	5.6018e-128	0.472799	0.513	0.242	1.04328e-123
Idh2	2.20649e-127	0.414811	0.682	0.365	4.10936e-123
Snrpa1	2.99879e-127	0.332012	0.499	0.219	5.58494e-123
Emp1	5.08776e-127	0.422162	0.769	0.458	9.47544e-123
Fzr1	1.11588e-126	0.333785	0.296	0.099	2.07822e-122
Itgb3bp	1.36634e-126	0.34018	0.33	0.118	2.54467e-122
Snx3	1.78993e-126	0.410939	0.831	0.544	3.33357e-122
2610524H06Rik	3.84728e-126	0.322029	0.338	0.12	7.16517e-122
H1fx	6.62997e-126	0.345727	0.247	0.074	1.23477e-121
Tex30	1.00758e-125	0.269236	0.221	0.061	1.87652e-121
Sumo2	1.46521e-125	0.481128	0.891	0.7	2.72881e-121
Atp5g2	3.86948e-125	0.454936	0.855	0.613	7.20652e-121
Actn1	2.0419e-124	0.280935	0.223	0.062	3.80283e-120
Srsf1	6.584e-124	0.345774	0.491	0.217	1.2262e-119
Lmf2	7.54709e-124	0.311293	0.369	0.14	1.40557e-119
Lrrc59	1.59922e-123	0.416815	0.616	0.317	2.97838e-119
Vrk1	1.21771e-122	0.239058	0.205	0.055	2.26786e-118
Ppih	1.35595e-122	0.277562	0.259	0.081	2.52531e-118
Banf1	2.33732e-122	0.380433	0.67	0.352	4.35303e-118
Manf	2.35473e-122	0.468021	0.82	0.561	4.38544e-118
Ass1	3.51782e-122	0.397666	0.252	0.077	6.55158e-118
Set	1.0102e-121	0.400146	0.764	0.452	1.88139e-117
Psat1	2.38828e-121	0.30015	0.32	0.114	4.44793e-117
Ubd	1.51102e-120	0.488517	0.238	0.072	2.81413e-116
Pbdc1	8.43465e-120	0.341	0.497	0.226	1.57087e-115
Nsmce4a	1.62621e-119	0.331567	0.542	0.253	3.02865e-115
Hmgn1	2.00754e-119	0.410806	0.905	0.693	3.73884e-115
Tubg1	4.58147e-119	0.271292	0.25	0.077	8.53252e-115
Hnrnpa2b1	5.84776e-119	0.443935	0.859	0.61	1.08909e-114
Hnrnpf	1.86732e-118	0.400242	0.795	0.507	3.4777e-114
Anxa2	6.25827e-118	0.651961	0.876	0.698	1.16554e-113
Gins4	3.21028e-116	0.296398	0.343	0.129	5.97882e-112
Rnf26	5.04239e-116	0.313782	0.289	0.099	9.39095e-112
Pih1d1	1.10086e-114	0.32999	0.448	0.196	2.05024e-110
Tfdp1	1.45678e-114	0.289714	0.338	0.127	2.71312e-110
Med30	5.1854e-114	0.328175	0.467	0.208	9.65728e-110
Mettl9	8.53428e-114	0.335564	0.641	0.338	1.58942e-109
Rab13	1.20482e-113	0.331974	0.55	0.264	2.24386e-109
Csrp1	1.65827e-113	0.360313	0.471	0.217	3.08836e-109
Nudc	2.25275e-113	0.376004	0.694	0.392	4.19551e-109
Mthfd2	4.58468e-113	0.322009	0.287	0.1	8.53851e-109
H2afy	7.30114e-113	0.33582	0.612	0.314	1.35976e-108
Hp1bp3	1.38799e-111	0.428464	0.633	0.348	2.58499e-107
Isg15	2.82566e-111	0.551084	0.64	0.364	5.26251e-107
Srsf3	3.06225e-111	0.39687	0.772	0.473	5.70314e-107
Cisd2	1.81513e-110	0.324522	0.657	0.352	3.3805e-106
U2af1	2.95964e-110	0.368531	0.724	0.42	5.51203e-106
Wdr1	4.73674e-110	0.319756	0.54	0.264	8.8217e-106
Fam96a	3.1829e-109	0.273071	0.546	0.259	5.92784e-105
Eny2	3.5772e-109	0.356829	0.745	0.453	6.66217e-105
Nme1	3.71748e-108	0.409389	0.785	0.515	6.92344e-104
Cdca4	7.47896e-107	0.236315	0.203	0.058	1.39288e-102
Dclk1	1.79606e-106	0.323009	0.653	0.345	3.34498e-102
Hsp90aa1	1.54784e-105	0.422073	0.888	0.68	2.88269e-101
Tssc4	2.50831e-105	0.292835	0.398	0.169	4.67147e-101
Rbbp7	2.86707e-105	0.352857	0.694	0.403	5.33964e-101
Dynll1	3.68236e-105	0.593537	0.874	0.73	6.85802e-101
Plp2	7.31343e-105	0.34381	0.451	0.209	1.36205e-100
Adam12	7.59834e-105	0.311869	0.468	0.214	1.41511e-100
Nup85	9.06272e-105	0.226577	0.246	0.08	1.68784e-100
Nudt4	9.77855e-105	0.30413	0.541	0.267	1.82116e-100
Nsmce1	2.21214e-104	0.305181	0.499	0.241	4.11989e-100
Cxcl9	2.77294e-104	0.599356	0.513	0.267	5.16432e-100
Lyar	9.11011e-104	0.313007	0.497	0.233	1.69667e-99
H3f3a	1.05814e-103	0.43037	0.901	0.727	1.97068e-99
Oaz1	1.20942e-103	0.375462	0.942	0.786	2.25242e-99
Arl6ip1	2.55865e-103	0.973461	0.739	0.524	4.76522e-99
Gjc1	4.20667e-103	0.284132	0.309	0.115	7.8345e-99
Ap2m1	4.4032e-103	0.383505	0.777	0.512	8.20051e-99
Irf7	5.99334e-103	0.338935	0.59	0.303	1.1162e-98
Nxn	3.01462e-102	0.26146	0.238	0.077	5.61443e-98
Hnrnpu	2.024e-101	0.360287	0.812	0.526	3.7695e-97
Smc1a	3.77674e-101	0.327184	0.645	0.356	7.0338e-97
Pole4	5.79402e-101	0.296555	0.528	0.261	1.07908e-96
Xpo1	8.41747e-101	0.260919	0.318	0.123	1.56767e-96
Ube2i	1.74485e-100	0.33999	0.747	0.456	3.2496e-96
Ubl4a	2.76086e-100	0.326414	0.515	0.256	5.14183e-96
Ptms	1.88238e-99	0.460312	0.823	0.587	3.50575e-95
Fkbp2	2.02455e-99	0.366124	0.792	0.517	3.77053e-95
S1pr3	1.95068e-98	0.270997	0.294	0.109	3.63294e-94
Creld2	1.99102e-98	0.284917	0.452	0.209	3.70807e-94
Cbx1	4.40584e-98	0.306723	0.631	0.351	8.20544e-94
Uhrf2	7.67171e-98	0.347753	0.508	0.253	1.42878e-93
Zbp1	1.00302e-97	0.349874	0.467	0.223	1.86803e-93
Cbfb	1.53638e-97	0.280505	0.363	0.152	2.86136e-93
Hnrnpd	2.31377e-97	0.295635	0.55	0.28	4.30916e-93
G3bp1	3.27814e-97	0.338598	0.661	0.373	6.10521e-93
Nelfe	8.21951e-97	0.249014	0.329	0.131	1.5308e-92
Cyb5r3	9.98391e-97	0.384335	0.67	0.395	1.8594e-92
Psmb8	3.49944e-96	0.416732	0.757	0.499	6.51736e-92
Ctsc	4.27258e-96	0.38714	0.393	0.178	7.95725e-92
Smarca5	9.80842e-96	0.325587	0.583	0.314	1.82672e-91
Brip1os	1.09764e-95	0.240618	0.301	0.115	2.04424e-91
Nup62	2.02967e-95	0.235	0.27	0.098	3.78006e-91
Smchd1	4.45128e-95	0.260931	0.415	0.186	8.29006e-91
Map4	4.22132e-94	0.253521	0.457	0.213	7.86179e-90
Bcat1	9.75808e-94	0.276184	0.31	0.123	1.81734e-89
Cotl1	1.04725e-93	0.3081	0.576	0.305	1.95039e-89
Erp29	1.16091e-92	0.361971	0.835	0.593	2.16208e-88
Tmem138	1.68984e-92	0.250451	0.223	0.074	3.14715e-88
Tubb2b	2.0562e-92	0.316847	0.266	0.097	3.82947e-88
Anapc5	1.09335e-91	0.316125	0.674	0.401	2.03626e-87
Rac1	1.34212e-91	0.3607	0.845	0.613	2.49956e-87
Tubgcp2	2.18008e-91	0.223194	0.205	0.066	4.06018e-87
Slbp	2.26115e-91	0.383466	0.467	0.237	4.21117e-87
Tap1	2.55675e-91	0.252036	0.392	0.175	4.7617e-87
Calm3	2.55812e-91	0.379261	0.772	0.51	4.76425e-87
Abracl	3.01653e-91	0.341918	0.651	0.376	5.61799e-87
Tcp1	3.14312e-91	0.277733	0.697	0.405	5.85375e-87
Rpp30	5.13798e-91	0.240569	0.297	0.116	9.56897e-87
Timm17b	7.37448e-91	0.274956	0.538	0.276	1.37342e-86
Phf5a	1.21815e-90	0.245666	0.539	0.271	2.26869e-86
Actr3	1.6122e-90	0.329687	0.684	0.41	3.00256e-86
Ly6e	1.68264e-90	0.437279	0.831	0.64	3.13374e-86
Loxl2	2.481e-90	0.404789	0.728	0.453	4.62062e-86
Vars	2.53416e-90	0.245392	0.299	0.118	4.71963e-86
Pin1	3.6299e-90	0.288307	0.592	0.319	6.76033e-86
Tubb2a	3.77746e-90	0.40033	0.567	0.317	7.03515e-86
Ptgr1	4.58988e-90	0.315995	0.301	0.121	8.54819e-86
Tmem167	5.04785e-90	0.334221	0.83	0.598	9.40111e-86
Prdx4	7.04955e-90	0.349438	0.815	0.565	1.31291e-85
Nono	1.15758e-89	0.265101	0.595	0.32	2.15588e-85
Cavin3	1.29344e-89	0.365205	0.923	0.76	2.4089e-85
Tpm1	2.17939e-89	0.491696	0.526	0.294	4.05889e-85
Acp1	3.23368e-89	0.338735	0.699	0.418	6.02241e-85
Hmgn3	3.90265e-89	0.306033	0.617	0.35	7.26829e-85
Jpt1	3.93743e-89	0.463695	0.827	0.605	7.33307e-85
Tpr	5.31408e-89	0.302295	0.765	0.474	9.89694e-85
Sox11	1.58105e-88	0.230668	0.209	0.068	2.94455e-84
Cacybp	1.88051e-88	0.279356	0.586	0.311	3.50225e-84
Atpif1	2.74167e-88	0.36834	0.82	0.573	5.10608e-84
Vdac1	2.96715e-88	0.275575	0.639	0.353	5.52602e-84
Mapre1	3.65432e-88	0.296911	0.67	0.396	6.80581e-84
H2-T22	6.64679e-88	0.384026	0.746	0.477	1.2379e-83
Mcub	1.15941e-87	0.330029	0.25	0.091	2.15929e-83
Ppp4c	1.63685e-87	0.25886	0.573	0.306	3.04847e-83
Lgmn	4.18729e-87	0.314164	0.616	0.342	7.79841e-83
Mtpn	4.21937e-87	0.281457	0.586	0.323	7.85815e-83
Txnl1	2.16686e-86	0.288323	0.635	0.36	4.03556e-82
Nudcd2	2.50817e-86	0.280856	0.567	0.306	4.67122e-82
S100a4	5.06796e-86	0.403432	0.278	0.109	9.43857e-82
Vbp1	7.25535e-86	0.269595	0.396	0.182	1.35124e-81
Pdap1	1.80169e-85	0.300654	0.696	0.424	3.35547e-81
Snrpb	2.1071e-85	0.343437	0.826	0.58	3.92426e-81
Eif6	2.19103e-85	0.307754	0.653	0.388	4.08058e-81
Fam216a	2.27442e-85	0.27678	0.31	0.13	4.23588e-81
Pfdn6	2.41695e-85	0.239557	0.601	0.322	4.50132e-81
Pgk1	4.40752e-85	0.304232	0.667	0.381	8.20856e-81
Znhit3	5.4478e-85	0.200774	0.291	0.116	1.0146e-80
Hnrnpdl	8.00468e-85	0.29113	0.67	0.402	1.49079e-80
Rgs10	1.02918e-84	0.26347	0.495	0.249	1.91674e-80
Tardbp	1.34383e-84	0.269783	0.44	0.213	2.50275e-80
Maz	1.78987e-84	0.244496	0.353	0.155	3.33346e-80
Snrnp40	2.17561e-84	0.240133	0.339	0.147	4.05186e-80
Mrfap1	2.28245e-84	0.340444	0.888	0.676	4.25083e-80
Morf4l2	2.53929e-84	0.346927	0.843	0.62	4.72917e-80
Trappc1	5.54076e-84	0.273691	0.53	0.284	1.03191e-79
Srp9	6.28842e-84	0.304786	0.828	0.587	1.17116e-79
Mrpl51	7.20121e-84	0.281255	0.724	0.443	1.34115e-79
Ap2s1	1.08608e-83	0.324551	0.751	0.497	2.02271e-79
Ergic2	1.45857e-83	0.267935	0.541	0.287	2.71644e-79
Serpinh1	1.60522e-83	0.316884	0.956	0.854	2.98957e-79
Magoh	1.76535e-83	0.256182	0.536	0.282	3.28779e-79
Psmb9	1.99125e-83	0.327632	0.552	0.305	3.7085e-79
Txn1	3.24781e-83	0.386974	0.893	0.743	6.04872e-79
Ilf2	6.52075e-83	0.253207	0.454	0.223	1.21442e-78
Crip1	8.35012e-83	0.532693	0.85	0.616	1.55513e-78
Nubp1	2.36716e-82	0.22511	0.305	0.126	4.4086e-78
2022-03-05	2.75109e-82	0.28432	0.623	0.349	5.12362e-78
Ak6	3.52673e-82	0.266766	0.377	0.174	6.56818e-78
2022-09-09	8.60709e-82	0.259303	0.315	0.135	1.60298e-77
Ptges3	1.29334e-81	0.272473	0.658	0.375	2.40871e-77
Fscn1	3.1481e-81	0.292916	0.583	0.323	5.86302e-77
Hspa14	3.15831e-81	0.243526	0.322	0.139	5.88204e-77
Commd1	3.18011e-81	0.288972	0.666	0.396	5.92264e-77
Rbm17	3.24932e-81	0.256734	0.524	0.277	6.05153e-77
Parp2	1.51557e-80	0.223868	0.251	0.095	2.8226e-76
Zfp91	2.44706e-80	0.279319	0.56	0.306	4.55741e-76
E2f1	5.31857e-80	0.256609	0.217	0.078	9.90531e-76
Fzd1	6.90423e-80	0.238268	0.345	0.15	1.28584e-75
Snrpc	1.01225e-79	0.2893	0.633	0.369	1.88522e-75
Khdrbs1	1.15802e-79	0.237357	0.532	0.282	2.1567e-75
Mbd3	1.47922e-79	0.278966	0.626	0.367	2.75491e-75
Ube2n	1.51126e-79	0.295787	0.652	0.387	2.81456e-75
Tmem119	1.74038e-79	0.258149	0.461	0.228	3.24128e-75
Mlec	3.08909e-79	0.254288	0.663	0.384	5.75312e-75
Sac3d1	5.13218e-79	0.222231	0.282	0.115	9.55817e-75
Ipo5	6.90035e-79	0.225807	0.341	0.152	1.28512e-74
Eif5a	1.20205e-78	0.371383	0.849	0.669	2.2387e-74
Hif1a	1.21875e-78	0.270209	0.391	0.185	2.2698e-74
Serbp1	1.48391e-78	0.326013	0.817	0.586	2.76363e-74
Ddx39b	1.61695e-78	0.291541	0.58	0.331	3.0114e-74
Fam92a	3.78904e-78	0.284733	0.529	0.288	7.05671e-74
Casp3	6.02707e-78	0.231079	0.246	0.095	1.12248e-73
Ostc	7.68533e-78	0.32707	0.846	0.631	1.43132e-73
Tmem176a	8.76263e-78	0.436133	0.606	0.366	1.63195e-73
Gm1673	1.19058e-77	0.217314	0.234	0.087	2.21734e-73
Smc3	1.33282e-77	0.271081	0.578	0.322	2.48224e-73
Trp53	1.74474e-77	0.275477	0.501	0.266	3.2494e-73
Emilin1	2.15568e-77	0.249305	0.472	0.24	4.01473e-73
Rfc1	3.15269e-77	0.256519	0.429	0.214	5.87156e-73
Pdlim7	6.25504e-77	0.22665	0.43	0.209	1.16494e-72
Cnot6	7.25213e-77	0.216766	0.387	0.184	1.35064e-72
Snrpf	7.54009e-77	0.2833	0.738	0.48	1.40427e-72
Fads3	9.29708e-77	0.202782	0.238	0.09	1.73149e-72
Cmpk1	1.03137e-76	0.254159	0.657	0.385	1.92083e-72
Erh	1.80288e-76	0.235628	0.367	0.17	3.35769e-72
Rbmx	1.90257e-76	0.227084	0.276	0.113	3.54335e-72
Med9	2.03934e-76	0.23134	0.354	0.162	3.79807e-72
Eif2ak2	2.18281e-76	0.23563	0.379	0.178	4.06526e-72
Cnih4	2.34891e-76	0.244227	0.614	0.354	4.37461e-72
Pycard	3.03793e-76	0.333543	0.463	0.243	5.65784e-72
Hprt	3.45334e-76	0.258959	0.459	0.237	6.43151e-72
Plod2	3.55892e-76	0.286717	0.357	0.165	6.62813e-72
Ccdc88a	3.89653e-76	0.218507	0.406	0.196	7.2569e-72
Tcof1	4.14697e-76	0.200905	0.246	0.095	7.72332e-72
Smc6	7.28427e-76	0.302892	0.725	0.477	1.35662e-71
Impdh2	1.03074e-75	0.235715	0.657	0.383	1.91965e-71
Txndc12	1.9432e-75	0.252423	0.419	0.209	3.61902e-71
Plpp1	2.01904e-75	0.24845	0.58	0.324	3.76026e-71
Dnajc10	2.17429e-75	0.225505	0.522	0.28	4.04941e-71
Cfap20	3.08591e-75	0.220896	0.452	0.231	5.7472e-71
Tmem107	3.55169e-75	0.24805	0.391	0.186	6.61468e-71
Pkig	3.63119e-75	0.230625	0.5	0.266	6.76272e-71
Rad50	4.35959e-75	0.248502	0.375	0.176	8.1193e-71
Saa3	5.72441e-75	0.659599	0.252	0.101	1.06611e-70
Tspo	5.91738e-75	0.351666	0.859	0.676	1.10205e-70
Dazap1	1.09301e-74	0.259401	0.522	0.283	2.03562e-70
Uchl5	1.55928e-74	0.212223	0.285	0.12	2.90399e-70
Pold2	4.62542e-74	0.227328	0.285	0.121	8.61438e-70
Cinp	4.90686e-74	0.22595	0.306	0.134	9.13853e-70
Vps36	7.48221e-74	0.227159	0.476	0.248	1.39349e-69
Psmd14	9.92893e-74	0.238994	0.464	0.243	1.84916e-69
Stat1	1.60927e-73	0.2536	0.45	0.232	2.9971e-69
Tspan6	1.78691e-73	0.252009	0.315	0.139	3.32794e-69
Pcmt1	1.81008e-73	0.242366	0.523	0.287	3.37109e-69
Ssr2	2.59781e-73	0.307162	0.844	0.635	4.83816e-69
Car13	3.80756e-73	0.229176	0.285	0.122	7.0912e-69
Smarcc1	5.87726e-73	0.221409	0.375	0.178	1.09458e-68
1700025G04Rik	6.35723e-73	0.215881	0.418	0.205	1.18397e-68
Orc6	1.86318e-72	0.286721	0.352	0.166	3.46999e-68
Snrnp25	2.79679e-72	0.204556	0.278	0.117	5.20874e-68
Elof1	2.85462e-72	0.255931	0.62	0.361	5.31644e-68
Ssb	2.89835e-72	0.301357	0.783	0.541	5.39789e-68
Palld	2.97069e-72	0.224549	0.39	0.188	5.53262e-68
Emc8	2.97364e-72	0.216665	0.439	0.223	5.5381e-68
Casp8ap2	5.91984e-72	0.206988	0.271	0.112	1.10251e-67
Pde6d	1.84207e-71	0.23215	0.48	0.258	3.43067e-67
Psma4	2.35509e-71	0.326946	0.789	0.567	4.38612e-67
Gbp3	4.14359e-71	0.261813	0.379	0.186	7.71702e-67
Pck2	5.93376e-71	0.254522	0.412	0.209	1.1051e-66
Slc25a5	1.55776e-70	0.209471	0.708	0.482	2.90118e-66
Srsf6	3.82631e-70	0.256581	0.629	0.38	7.12611e-66
2022-09-11	4.6842e-70	0.247894	0.532	0.298	8.72386e-66
Ywhaq	1.26551e-69	0.27392	0.787	0.542	2.35688e-65
Mpp6	1.93683e-69	0.204723	0.32	0.146	3.60715e-65
Eif4e2	2.58015e-69	0.256591	0.603	0.356	4.80527e-65
Xaf1	2.98641e-69	0.233199	0.465	0.244	5.56189e-65
Rbbp4	3.01172e-69	0.263447	0.482	0.263	5.60902e-65
Myo1b	3.03055e-69	0.211919	0.227	0.089	5.6441e-65
Gtf2a2	3.71702e-69	0.236718	0.625	0.373	6.92257e-65
Rtp4	3.90416e-69	0.258141	0.544	0.308	7.27111e-65
Cby1	4.41006e-69	0.250353	0.305	0.137	8.2133e-65
Fkbp10	5.43139e-69	0.313678	0.613	0.374	1.01154e-64
Syncrip	5.65577e-69	0.246511	0.53	0.293	1.05333e-64
Tln2	8.30103e-69	0.202574	0.246	0.099	1.54598e-64
Glipr2	9.76588e-69	0.297916	0.496	0.275	1.8188e-64
Baz1b	1.15473e-68	0.205765	0.456	0.236	2.15056e-64
Sfpq	1.23727e-68	0.248701	0.664	0.4	2.30429e-64
Npm1	1.84228e-68	0.298195	0.871	0.721	3.43106e-64
Ubtf	2.20323e-68	0.245435	0.536	0.304	4.1033e-64
Ppp1cc	2.45789e-68	0.261107	0.701	0.452	4.57757e-64
Npm3	2.57213e-68	0.235602	0.58	0.321	4.79034e-64
Rnf213	2.63639e-68	0.217661	0.406	0.204	4.91001e-64
Ssr1	4.11827e-68	0.241382	0.662	0.409	7.66986e-64
Suz12	4.4272e-68	0.20937	0.234	0.094	8.24521e-64
Gnb2	7.53504e-68	0.335647	0.848	0.661	1.40333e-63
Gnai2	1.25203e-67	0.290123	0.824	0.615	2.33178e-63
Vmp1	2.22796e-67	0.213409	0.459	0.245	4.14936e-63
Serp1	4.02461e-67	0.236857	0.715	0.463	7.49543e-63
Arpc1b	7.21528e-67	0.323752	0.898	0.748	1.34377e-62
Psmd13	7.28194e-67	0.226675	0.532	0.3	1.35619e-62
Tnfrsf12a	9.53274e-67	0.249401	0.322	0.15	1.77538e-62
Tmx1	1.03489e-66	0.206696	0.4	0.202	1.92738e-62
Kdelr2	1.1067e-66	0.372185	0.683	0.471	2.06111e-62
Ptbp1	1.20533e-66	0.201118	0.423	0.217	2.24481e-62
Mlf2	4.12636e-66	0.257803	0.715	0.457	7.68493e-62
Aida	4.49214e-66	0.229219	0.598	0.35	8.36615e-62
Fxn	6.09113e-66	0.204823	0.258	0.11	1.13441e-61
Dcun1d5	7.40336e-66	0.231307	0.655	0.395	1.3788e-61
Trim28	8.52211e-66	0.224528	0.397	0.202	1.58716e-61
Tsen34	1.15626e-65	0.261215	0.735	0.489	2.15343e-61
Rnps1	1.90502e-65	0.219189	0.392	0.199	3.54791e-61
Phf11d	1.97537e-65	0.24212	0.341	0.164	3.67892e-61
Taf15	2.38268e-65	0.210647	0.28	0.124	4.4375e-61
Ccl7	2.67201e-65	0.431706	0.556	0.344	4.97635e-61
Pradc1	4.15368e-65	0.234044	0.25	0.106	7.73582e-61
Nmi	4.15881e-65	0.222727	0.381	0.189	7.74536e-61
Sec11c	4.69848e-65	0.201261	0.482	0.261	8.75044e-61
Tmem237	5.06291e-65	0.205599	0.26	0.109	9.42917e-61
Gm47283	5.30595e-65	0.203314	0.359	0.179	9.88179e-61
Pcbp1	5.35214e-65	0.242892	0.788	0.545	9.96783e-61
Rexo2	6.08364e-65	0.299999	0.801	0.59	1.13302e-60
Hnrnpa0	1.0288e-64	0.236617	0.583	0.346	1.91604e-60
Trir	1.33563e-64	0.253009	0.678	0.441	2.48747e-60
Akirin2	2.01004e-64	0.270378	0.442	0.24	3.7435e-60
Iqgap1	5.05347e-64	0.223934	0.55	0.319	9.41159e-60
Ube2l3	8.67956e-64	0.239056	0.668	0.415	1.61648e-59
Scoc	1.29511e-63	0.215762	0.402	0.206	2.41201e-59
Arpc2	1.36147e-63	0.301922	0.801	0.592	2.53561e-59
Reep5	2.24105e-63	0.34198	0.838	0.664	4.17374e-59
Bud31	2.52784e-63	0.231823	0.561	0.329	4.70785e-59
Mrpl14	2.817e-63	0.218927	0.675	0.422	5.24638e-59
Arhgdia	2.97148e-63	0.27652	0.775	0.543	5.53408e-59
Ssr4	3.42972e-63	0.298224	0.863	0.687	6.38752e-59
Arf5	3.70365e-63	0.282496	0.895	0.72	6.89768e-59
Rhoc	4.80498e-63	0.263859	0.815	0.589	8.9488e-59
Basp1	6.10833e-63	0.279752	0.606	0.361	1.13762e-58
Eloc	9.68593e-63	0.24902	0.707	0.469	1.80391e-58
Srsf2	1.03425e-62	0.289834	0.691	0.471	1.92619e-58
Psmb2	1.24162e-62	0.286378	0.82	0.626	2.3124e-58
Nedd8	2.61308e-62	0.269111	0.808	0.591	4.8666e-58
Ifitm3	3.00485e-62	0.316016	0.933	0.788	5.59624e-58
Rbm8a	4.0141e-62	0.254111	0.587	0.361	7.47586e-58
Ilk	7.25121e-62	0.24226	0.645	0.411	1.35047e-57
Metrn	1.62284e-61	0.216348	0.209	0.083	3.02238e-57
Ap1s1	1.70533e-61	0.222342	0.505	0.288	3.17601e-57
Mrpl17	2.08084e-61	0.220577	0.686	0.43	3.87536e-57
Cnep1r1	5.25711e-61	0.220655	0.4	0.208	9.79085e-57
H2-Q4	7.64658e-61	0.231112	0.431	0.23	1.4241e-56
Pdia6	7.77494e-61	0.328833	0.826	0.667	1.448e-56
Gapdh	8.62291e-61	0.251677	0.694	0.443	1.60593e-56
Limd2	1.05219e-60	0.220303	0.343	0.169	1.9596e-56
Smarca4	1.57998e-60	0.203775	0.314	0.151	2.94255e-56
Hdac2	1.72358e-60	0.235534	0.475	0.263	3.21e-56
Ctcf	1.91327e-60	0.220226	0.408	0.216	3.56328e-56
Tmem176b	2.74132e-60	0.336546	0.664	0.444	5.10543e-56
Sar1a	6.0193e-60	0.260176	0.797	0.577	1.12103e-55
Adprh	9.02722e-60	0.220534	0.611	0.377	1.68123e-55
Oasl2	1.20138e-59	0.203815	0.436	0.232	2.23744e-55
Nudt5	1.49295e-59	0.201974	0.324	0.157	2.78048e-55
Sumo1	1.56197e-59	0.238931	0.774	0.536	2.90901e-55
Arpc5l	1.75428e-59	0.206761	0.557	0.324	3.26717e-55
Gng12	1.84028e-59	0.221141	0.627	0.392	3.42735e-55
Lims1	1.95343e-59	0.218917	0.567	0.337	3.63807e-55
Ube2k	5.43163e-59	0.203372	0.636	0.391	1.01159e-54
Emp3	7.29876e-59	0.306773	0.861	0.653	1.35932e-54
Tmed3	7.83306e-59	0.266858	0.888	0.733	1.45883e-54
Fkbp11	1.15345e-58	0.321737	0.569	0.358	2.14818e-54
Bax	2.21046e-58	0.245946	0.686	0.448	4.11676e-54
Cdv3	2.33519e-58	0.219048	0.545	0.318	4.34907e-54
1810037I17Rik	2.33803e-58	0.274942	0.699	0.493	4.35435e-54
Psma3	3.65364e-58	0.296923	0.819	0.626	6.80455e-54
Ppp1r11	3.83459e-58	0.206898	0.464	0.257	7.14155e-54
Kdelr3	3.96857e-58	0.250749	0.697	0.46	7.39107e-54
Rheb	8.73713e-58	0.226818	0.776	0.554	1.6272e-53
Tbcb	1.33431e-57	0.211645	0.622	0.388	2.48502e-53
Thoc7	1.543e-57	0.219678	0.602	0.37	2.87368e-53
Arpp19	2.03558e-57	0.231616	0.654	0.43	3.79107e-53
Rpsa	5.19319e-57	0.288458	0.929	0.791	9.6718e-53
Tmed2	1.03305e-56	0.271822	0.877	0.706	1.92395e-52
Pa2g4	1.58257e-56	0.205713	0.502	0.284	2.94739e-52
Cenpx	3.23065e-56	0.203762	0.588	0.358	6.01676e-52
Tial1	3.38608e-56	0.203498	0.367	0.19	6.30624e-52
Mif	3.74982e-56	0.344508	0.69	0.486	6.98367e-52
Ssu72	3.85697e-56	0.202577	0.594	0.358	7.18323e-52
Hnrnpc	5.43367e-56	0.22058	0.688	0.444	1.01197e-51
Col18a1	6.01864e-56	0.253917	0.476	0.279	1.12091e-51
Atp5g3	7.80609e-56	0.210678	0.746	0.514	1.45381e-51
Colgalt1	9.48777e-56	0.216776	0.639	0.41	1.767e-51
Cwc15	9.98865e-56	0.249852	0.602	0.388	1.86029e-51
Psmd7	1.01731e-55	0.24261	0.74	0.516	1.89464e-51
Myl12a	1.05142e-55	0.294451	0.845	0.684	1.95816e-51
Pdlim1	1.96769e-55	0.211019	0.359	0.185	3.66463e-51
Hnrnpk	3.43835e-55	0.276487	0.827	0.64	6.40358e-51
Taf10	4.94351e-55	0.217542	0.592	0.358	9.20679e-51
Lman1	8.22655e-55	0.253856	0.752	0.533	1.53211e-50
Spon2	1.23178e-54	0.263545	0.282	0.135	2.29406e-50
Cnn2	1.34456e-54	0.222621	0.275	0.129	2.5041e-50
Surf4	1.89092e-54	0.235308	0.688	0.464	3.52165e-50
2022-09-07	2.01138e-54	0.285056	0.819	0.628	3.746e-50
Npc2	2.40586e-54	0.374256	0.846	0.741	4.48067e-50
Bgn	5.78875e-54	0.22487	0.841	0.629	1.0781e-49
Pank2	1.30617e-53	0.202481	0.285	0.136	2.43261e-49
Bag1	1.61766e-53	0.210091	0.789	0.556	3.01273e-49
Rer1	2.93857e-53	0.225663	0.809	0.608	5.4728e-49
Pgam1	3.11964e-53	0.230911	0.707	0.471	5.81002e-49
Myl6	3.32394e-53	0.308696	0.858	0.715	6.1905e-49
Angptl4	9.90438e-53	0.307398	0.703	0.486	1.84459e-48
Edf1	1.11635e-52	0.283656	0.832	0.66	2.07908e-48
Med21	2.84159e-52	0.211137	0.515	0.306	5.29218e-48
Tceal8	3.53047e-52	0.243169	0.724	0.507	6.57516e-48
Bcl7c	7.86463e-52	0.20952	0.653	0.42	1.46471e-47
Ncl	9.15287e-52	0.213047	0.708	0.494	1.70463e-47
Gng5	2.1135e-51	0.257795	0.884	0.732	3.93618e-47
Ywhae	2.49177e-51	0.256718	0.814	0.616	4.64068e-47
Hspa8	2.69032e-51	0.322112	0.825	0.661	5.01045e-47
Hsp90b1	3.99861e-51	0.249814	0.919	0.823	7.44701e-47
Hsp90ab1	4.24869e-51	0.222867	0.931	0.821	7.91276e-47
Tsn	5.16397e-51	0.214474	0.685	0.459	9.61738e-47
Tspan4	3.78401e-50	0.211167	0.522	0.318	7.04735e-46
Mydgf	7.48793e-50	0.222245	0.75	0.52	1.39455e-45
Sf3b6	1.24294e-49	0.206003	0.666	0.444	2.31485e-45
Sec61g	2.99594e-49	0.25869	0.87	0.707	5.57963e-45
Vdac3	3.91686e-49	0.216982	0.71	0.483	7.29475e-45
Rsad2	4.71705e-49	0.205656	0.214	0.094	8.78503e-45
Sec61b	8.06281e-49	0.295007	0.848	0.697	1.50162e-44
Snu13	1.14729e-48	0.213817	0.705	0.479	2.13671e-44
Calr	2.47356e-48	0.318777	0.855	0.753	4.60675e-44
Ppp1ca	2.81688e-48	0.242085	0.806	0.622	5.24615e-44
Tmed9	7.11149e-48	0.209448	0.861	0.684	1.32444e-43
Eif4g2	1.65069e-47	0.21798	0.813	0.613	3.07424e-43
Lypd1	2.51522e-47	0.293198	0.315	0.166	4.68434e-43
Cbx3	3.27804e-47	0.326726	0.544	0.358	6.10502e-43
Thbs1	1.37732e-46	0.21872	0.299	0.154	2.56512e-42
Pdlim4	2.09511e-46	0.215984	0.479	0.287	3.90193e-42
Atp5j	2.37405e-46	0.247945	0.848	0.703	4.42144e-42
Thbs2	9.14835e-46	0.262263	0.444	0.259	1.70379e-41
Rab2a	1.20511e-45	0.202267	0.859	0.678	2.24439e-41
Ppib	1.0472e-44	0.22302	0.931	0.832	1.95031e-40
Dpysl3	1.38562e-44	0.24318	0.501	0.313	2.58058e-40
Itgb1	1.45304e-43	0.208603	0.756	0.543	2.70614e-39
Capzb	1.61704e-43	0.227748	0.72	0.523	3.01158e-39
Cd63	3.62959e-43	0.259101	0.906	0.798	6.75974e-39
Psmb6	6.77032e-43	0.203394	0.772	0.586	1.2609e-38
Psmb4	1.17596e-41	0.206522	0.731	0.539	2.1901e-37
Prdx1	1.39834e-40	0.31192	0.82	0.713	2.60426e-36
Gpx4	2.06261e-40	0.206873	0.844	0.712	3.8414e-36
Lox	2.84115e-40	0.226307	0.364	0.209	5.29136e-36
Ldha	1.12859e-39	0.316125	0.715	0.567	2.1019e-35
Dap	1.44995e-39	0.20211	0.741	0.541	2.70039e-35
Arf1	2.23293e-38	0.214116	0.832	0.645	4.15861e-34
Iigp1	2.09433e-37	0.204209	0.515	0.338	3.90048e-33
H1f0	1.37653e-36	0.353608	0.601	0.43	2.56364e-32
Elob	1.65594e-36	0.207549	0.867	0.725	3.08403e-32
Tax1bp1	2.30618e-36	0.202281	0.705	0.512	4.29502e-32
Csrp2	1.93665e-34	0.208283	0.659	0.453	3.60681e-30
Cstb	5.81352e-34	0.233913	0.764	0.61	1.08271e-29
Rpl41	2.01964e-32	0.210971	0.916	0.784	3.76138e-28
Hspa5	8.05758e-29	0.222302	0.834	0.71	1.50064e-24
Pkm	4.07626e-27	0.27622	0.655	0.516	7.59163e-23
Anxa5	7.44947e-27	0.211117	0.801	0.673	1.38739e-22
H2-K1	6.72773e-26	0.282484	0.757	0.663	1.25297e-21
S100a10	8.68745e-13	0.282608	0.803	0.726	1.61795e-08
Tmsb4x	6.04948e-07	0.36796	0.528	0.489	0.0112665
Actb	0.0303526	0.312262	0.303	0.289	1
