# Supplementary material for: Deconstructing cold-induced brown adipocyte neogenesis in mice
Source: eLife. 2022 Jul 18;11:e80167. doi: 10.7554/eLife.80167 (PMC9348851; doi:10.7554/eLife.80167)
Supplement: Supplementary file 7. [file elife-80167-supp7.xlsx]

## Sheet: INFORMATION
Supplementary File 7. DEGs for each cluster in the CONTROL and COLD Lin+ iBAT data.
Related to Figure 6A-B.
List of DEGs define by Seurat by graph-based clustering. Each cluster is a new tab.
iBAT, Lin+ cells, CONTROL and COLD libraries.
Differentially expressed genes that define each cluster were identified using a Wilcoxon Rank Sum test in Seurat with the following parameters: min.pct = 0.20, logfc.threshold = 0.2, only.pos = TRUE.

## Sheet: MONO
	p_val	avg_logFC	pct.1	pct.2	p_val_adj
Ifitm6	0	1.82492	0.856	0.178	0
Plac8	0	1.69553	0.916	0.37	0
Ear2	0	1.64632	0.483	0.082	0
Gngt2	0	1.64099	0.813	0.344	0
Cebpb	0	1.48537	0.957	0.463	0
Gsr	0	1.45332	0.766	0.177	0
Msrb1	0	1.44021	0.919	0.38	0
Lyz2	0	1.42735	0.997	0.435	0
Mgst1	0	1.42227	0.604	0.135	0
Fn1	0	1.4032	0.465	0.081	0
Hp	0	1.38494	0.575	0.072	0
Smpdl3a	0	1.36508	0.772	0.298	0
Lst1	0	1.33102	0.938	0.42	0
Ace	0	1.33038	0.374	0.021	0
Prdx5	0	1.3246	0.881	0.517	0
Gm9733	0	1.31966	0.515	0.042	0
Sat1	0	1.30889	0.955	0.63	0
Itgal	0	1.25141	0.544	0.128	0
Cybb	0	1.22008	0.895	0.415	0
S100a4	0	1.21416	0.846	0.416	0
Adgre4	0	1.2022	0.393	0.041	0
Plaur	0	1.09573	0.764	0.288	0
Ifitm3	0	1.0452	0.992	0.548	0
Sirpb1c	0	1.04496	0.477	0.088	0
Cd44	0	1.04073	0.805	0.398	0
Ifitm2	0	1.03519	0.938	0.53	0
Tyrobp	0	1.01384	0.991	0.648	0
Emilin2	0	0.970316	0.567	0.172	0
Alox5ap	0	0.925708	0.906	0.53	0
Klra2	0	0.915594	0.423	0.069	0
Treml4	0	0.904342	0.277	0.032	0
Fcer1g	0	0.879392	0.995	0.61	0
Trem3	0	0.878266	0.304	0.033	0
Gpx1	0	0.867641	0.974	0.664	0
Il17ra	0	0.843207	0.483	0.127	0
Coro1a	0	0.799651	0.959	0.754	0
Zfyve9	0	0.697405	0.23	0.021	0
Ldlrad3	0	0.66254	0.236	0.021	0
Chil3	1.29793e-306	1.97773	0.462	0.123	2.21764e-302
Gpr141	2.76638e-302	0.902705	0.384	0.087	4.72664e-298
Rnf149	7.46636e-301	1.00306	0.68	0.288	1.2757e-296
Ncf2	8.07599e-295	0.946783	0.729	0.348	1.37986e-290
Hpgd	4.12788e-291	0.969196	0.397	0.09	7.0529e-287
Tppp3	7.47935e-291	1.23526	0.423	0.108	1.27792e-286
Csf1r	2.3482e-286	0.892068	0.709	0.291	4.01213e-282
Mcemp1	3.54518e-278	0.75094	0.404	0.097	6.05729e-274
Cx3cr1	1.25747e-277	0.825351	0.435	0.112	2.14851e-273
Il1b	4.83859e-276	0.840212	0.685	0.267	8.26722e-272
Pou2f2	5.06917e-266	0.97638	0.568	0.198	8.66119e-262
Rap1b	5.35759e-266	0.865645	0.906	0.644	9.15398e-262
Pglyrp1	3.9112e-264	1.24433	0.461	0.134	6.68268e-260
Clec4a3	9.12089e-264	0.912614	0.679	0.29	1.5584e-259
Adgre5	2.28352e-261	0.967603	0.69	0.321	3.90161e-257
H3f3a	7.25712e-261	0.604459	0.974	0.849	1.23995e-256
Fgr	4.87881e-258	0.893116	0.443	0.131	8.33594e-254
Nupr1	6.5562e-258	0.955404	0.442	0.128	1.12019e-253
Sem1	5.18259e-257	0.713124	0.949	0.732	8.85497e-253
Nr4a1	9.49871e-256	0.992345	0.827	0.455	1.62295e-251
Mrpl33	8.7052e-251	0.884909	0.8	0.511	1.48737e-246
Napsa	5.61898e-241	0.798537	0.781	0.388	9.60059e-237
Rps27a	2.20392e-240	0.498838	0.997	0.903	3.76562e-236
Ly6i	2.66161e-232	0.719721	0.226	0.037	4.54763e-228
Cytip	2.91727e-232	0.787067	0.797	0.42	4.98445e-228
Ceacam1	5.04384e-232	0.604021	0.214	0.033	8.6179e-228
Samsn1	2.335e-231	0.792237	0.604	0.236	3.98958e-227
Fau	6.59373e-230	0.485326	0.998	0.908	1.1266e-225
Ptprc	6.19882e-222	0.725156	0.89	0.631	1.05913e-217
Ifngr1	6.03532e-221	0.815257	0.787	0.467	1.0312e-216
Ms4a6c	1.69551e-214	0.743437	0.806	0.435	2.89695e-210
Nadk	2.4036e-213	0.915296	0.577	0.265	4.10679e-209
Cdk2ap2	8.77028e-211	0.902954	0.746	0.438	1.49849e-206
Stk10	1.42321e-208	0.838466	0.405	0.125	2.43169e-204
Gda	2.03616e-207	0.789536	0.49	0.179	3.47898e-203
Ccl6	1.42137e-202	0.484408	0.837	0.435	2.42855e-198
C3	1.37662e-194	0.54064	0.265	0.058	2.35209e-190
Cd300a	6.31101e-192	0.757557	0.685	0.347	1.0783e-187
Clec4e	1.14376e-189	0.628706	0.396	0.119	1.95423e-185
S100a6	2.12142e-187	0.675575	0.907	0.572	3.62466e-183
Rap1a	1.16264e-186	0.786514	0.805	0.552	1.98649e-182
Tmcc1	6.86069e-186	0.786674	0.454	0.167	1.17222e-181
Cxcr4	8.96938e-186	0.80315	0.618	0.288	1.53251e-181
Taldo1	2.38339e-185	0.684712	0.822	0.543	4.07227e-181
Clec4a1	7.00574e-185	0.758298	0.582	0.26	1.197e-180
Spn	1.24525e-184	0.893731	0.341	0.099	2.12763e-180
F13a1	7.61034e-183	0.796294	0.425	0.144	1.3003e-178
Krt80	4.52325e-178	0.689761	0.229	0.049	7.72842e-174
Sirpb1b	8.2848e-178	0.543481	0.242	0.053	1.41554e-173
Eno3	1.26016e-176	0.937172	0.271	0.067	2.1531e-172
Srgn	2.6135e-176	0.510884	0.96	0.77	4.46543e-172
Prkcd	4.53886e-171	0.811541	0.658	0.379	7.7551e-167
Trps1	4.72465e-169	0.781709	0.444	0.175	8.07254e-165
Igsf6	7.05465e-168	0.77756	0.463	0.193	1.20536e-163
Cd244	1.24117e-167	0.656189	0.302	0.085	2.12066e-163
Spi1	1.65091e-166	0.67024	0.821	0.519	2.82075e-162
Neat1	9.02304e-166	0.709431	0.826	0.542	1.54168e-161
F10	6.02848e-163	0.512307	0.319	0.09	1.03003e-158
Cyp4f18	2.62226e-162	0.716116	0.473	0.191	4.48039e-158
Samhd1	2.69506e-161	0.710264	0.744	0.482	4.60478e-157
Ldlr	7.98163e-161	0.724159	0.37	0.127	1.36374e-156
Prr13	3.48062e-160	0.807583	0.727	0.47	5.94699e-156
Fyb	5.0565e-160	0.717526	0.734	0.429	8.63954e-156
Klf4	6.91241e-160	0.731075	0.755	0.464	1.18105e-155
Rasgrp2	3.06968e-159	0.60555	0.434	0.153	5.24485e-155
Dok3	2.02249e-158	0.608528	0.386	0.134	3.45562e-154
Fxyd5	1.12551e-156	0.566237	0.9	0.65	1.92305e-152
Flna	2.39332e-155	0.779291	0.601	0.329	4.08922e-151
Tgfbi	5.5607e-155	0.716234	0.651	0.364	9.50101e-151
Fam49b	2.59557e-149	0.631304	0.787	0.548	4.4348e-145
Pilra	6.08868e-147	0.734464	0.345	0.119	1.04031e-142
Nfil3	1.36904e-146	0.667877	0.351	0.123	2.33914e-142
Itga4	9.3469e-146	0.725753	0.544	0.264	1.59701e-141
Adssl1	3.08958e-141	0.721044	0.423	0.181	5.27886e-137
Agpat4	4.21558e-141	0.856894	0.452	0.207	7.20274e-137
Tpd52	6.40915e-141	0.658753	0.694	0.435	1.09507e-136
Ly6c2	1.33592e-140	0.695138	0.513	0.231	2.28255e-136
Ap1s2	1.51239e-140	0.691516	0.448	0.2	2.58407e-136
Bin2	5.46781e-140	0.658732	0.471	0.212	9.34229e-136
Ikbkb	5.32435e-139	0.682293	0.564	0.302	9.09719e-135
Itgb2	6.23883e-139	0.682238	0.704	0.438	1.06597e-134
Tnfrsf1a	1.12271e-138	0.738821	0.516	0.27	1.91825e-134
Camkk2	8.93629e-138	0.641603	0.347	0.126	1.52685e-133
Cyba	4.83407e-136	0.409087	0.981	0.756	8.2595e-132
Tmem38b	1.73734e-135	0.571554	0.267	0.079	2.96842e-131
Lyn	7.09937e-135	0.707806	0.595	0.351	1.213e-130
Tln1	8.73287e-133	0.665233	0.716	0.485	1.4921e-128
Dusp16	1.88353e-132	0.828698	0.242	0.068	3.21819e-128
Glud1	6.26726e-132	0.701822	0.637	0.406	1.07082e-127
Pld4	1.70734e-130	0.605937	0.705	0.432	2.91716e-126
Rps9	2.21729e-127	0.378157	0.992	0.896	3.78845e-123
Rara	3.56611e-127	0.578356	0.291	0.096	6.09306e-123
Slc25a5	2.26645e-126	0.58141	0.851	0.679	3.87246e-122
Ltb4r1	2.06607e-124	0.5552	0.24	0.069	3.53009e-120
Tnfrsf1b	4.89929e-124	0.715152	0.432	0.2	8.37093e-120
AI839979	5.03328e-123	0.518052	0.217	0.059	8.59987e-119
Gm5150	1.57628e-122	0.546026	0.255	0.077	2.69322e-118
Hes1	7.4399e-122	0.559104	0.207	0.051	1.27118e-117
Hopx	1.93085e-121	0.482029	0.29	0.094	3.29904e-117
Tlr2	2.60682e-121	0.717174	0.393	0.17	4.45402e-117
Rps14	1.05699e-120	0.294825	0.996	0.904	1.80597e-116
Arhgef10l	4.02067e-120	0.572601	0.212	0.057	6.86971e-116
Fam49a	5.98436e-116	0.643576	0.378	0.161	1.02249e-111
Ptpre	5.57324e-115	0.697319	0.5	0.269	9.52243e-111
Nfam1	1.0507e-114	0.641422	0.411	0.192	1.79523e-110
H2afj	2.07455e-113	0.590841	0.686	0.48	3.54457e-109
Atp5l	3.85743e-113	0.444821	0.926	0.771	6.5908e-109
Cox4i1	1.25607e-112	0.414388	0.934	0.81	2.14612e-108
Atp2b1	8.27044e-112	0.581098	0.772	0.57	1.41309e-107
Lsp1	1.13432e-111	0.399717	0.879	0.61	1.9381e-107
Gm21188	1.6323e-111	0.626685	0.357	0.151	2.78895e-107
BC028528	2.11059e-111	0.601714	0.553	0.316	3.60616e-107
Laptm4a	4.62197e-110	0.568822	0.668	0.445	7.89709e-106
Zeb2	5.92277e-110	0.608242	0.665	0.4	1.01197e-105
Rpl35a	6.05196e-110	0.322342	0.996	0.899	1.03404e-105
Tkt	1.06104e-108	0.606971	0.639	0.424	1.81289e-104
Gsto1	2.80174e-108	0.634854	0.441	0.227	4.78706e-104
Slc16a3	1.70312e-107	0.569548	0.257	0.085	2.90995e-103
Pygl	2.7986e-107	0.454152	0.221	0.066	4.78168e-103
Psma7	3.51852e-105	0.553396	0.773	0.591	6.01174e-101
Filip1l	3.85282e-104	0.61879	0.413	0.193	6.58293e-100
Pilrb2	1.05691e-103	0.511363	0.213	0.064	1.80583e-99
Sqor	3.46785e-103	0.479009	0.239	0.078	5.92516e-99
Degs1	1.218e-102	0.655027	0.507	0.295	2.08108e-98
Rhoa	6.59908e-102	0.5036	0.842	0.678	1.12752e-97
Gmfg	3.93098e-101	0.473123	0.779	0.584	6.71646e-97
Atox1	8.56001e-101	0.419598	0.894	0.634	1.46256e-96
Hck	9.58628e-101	0.64478	0.482	0.27	1.63791e-96
Itgam	1.92279e-99	0.584219	0.438	0.222	3.28527e-95
Slc44a2	1.3727e-98	0.509078	0.312	0.121	2.34539e-94
Emp3	2.17524e-97	0.536336	0.836	0.614	3.71661e-93
Arpc1b	3.65102e-97	0.408031	0.93	0.736	6.23814e-93
Arhgdib	4.22092e-96	0.446081	0.845	0.692	7.21186e-92
Rnase6	5.53377e-96	0.486242	0.495	0.251	9.45501e-92
Klf13	2.68538e-95	0.574378	0.548	0.329	4.58824e-91
Psap	2.95616e-95	0.219851	0.96	0.627	5.05089e-91
Msn	3.10982e-95	0.551332	0.761	0.574	5.31345e-91
Ccdc88c	1.52126e-94	0.417021	0.276	0.096	2.59922e-90
Plbd1	2.74498e-94	0.377521	0.619	0.343	4.69007e-90
Gm2a	3.55767e-94	0.471411	0.703	0.447	6.07864e-90
Il6ra	2.80807e-93	0.590612	0.417	0.215	4.79787e-89
Uqcrh	1.40109e-92	0.388606	0.886	0.766	2.39389e-88
Nfe2l2	3.03653e-92	0.655284	0.544	0.339	5.18821e-88
AB124611	1.31081e-91	0.533433	0.52	0.302	2.23966e-87
Apbb1ip	1.84401e-91	0.608481	0.553	0.349	3.15068e-87
Mpeg1	8.75796e-91	0.482663	0.689	0.439	1.49638e-86
Ssh2	1.3092e-90	0.436758	0.415	0.192	2.2369e-86
Gpcpd1	2.11748e-90	0.648168	0.435	0.228	3.61792e-86
Aldh2	5.38375e-90	0.550678	0.542	0.325	9.19868e-86
Tmsb10	4.11447e-89	0.425968	0.947	0.806	7.02998e-85
Arpc2	9.34479e-89	0.394497	0.935	0.755	1.59665e-84
Add3	2.26305e-88	0.448135	0.405	0.192	3.86664e-84
Pim1	2.68811e-88	0.457505	0.779	0.543	4.5929e-84
Fgd4	1.46784e-86	0.516743	0.242	0.089	2.50796e-82
Csgalnact2	7.93803e-86	0.500219	0.242	0.089	1.35629e-81
Grk3	9.13164e-86	0.702839	0.276	0.114	1.56023e-81
Abi3	9.49025e-85	0.569344	0.276	0.113	1.6215e-80
Cd302	1.00989e-84	0.550223	0.381	0.192	1.7255e-80
Emb	3.58249e-84	0.44015	0.553	0.337	6.12104e-80
Zfand5	1.29617e-82	0.551373	0.703	0.51	2.21464e-78
Actg1	1.67242e-82	0.329803	0.973	0.803	2.8575e-78
Ptpro	1.70427e-82	0.551612	0.306	0.137	2.91192e-78
Cd52	1.97146e-82	0.30654	0.965	0.799	3.36843e-78
Fmnl1	5.17576e-82	0.557703	0.393	0.202	8.8433e-78
Dbi	7.57074e-82	0.446583	0.724	0.538	1.29354e-77
Eif1	1.28271e-81	0.285957	0.979	0.896	2.19164e-77
Thbs1	2.58903e-81	0.548814	0.206	0.068	4.42361e-77
Lmo4	1.7927e-80	0.550005	0.367	0.182	3.06301e-76
Crip1	2.46131e-79	0.55151	0.872	0.701	4.20539e-75
Fosl2	2.56243e-78	0.459042	0.395	0.198	4.37816e-74
Rbpms	4.08687e-78	0.471465	0.207	0.071	6.98282e-74
Cd14	1.7304e-77	0.670813	0.496	0.295	2.95655e-73
Mbp	2.58031e-77	0.460758	0.281	0.12	4.40871e-73
Rpl37a	5.85912e-77	0.252419	0.99	0.897	1.00109e-72
Plek	2.36755e-76	0.490044	0.631	0.435	4.04519e-72
Ly6e	2.41996e-76	0.312821	0.952	0.745	4.13475e-72
Fcgr3	9.86865e-76	0.386837	0.562	0.312	1.68616e-71
Myl12b	1.12341e-75	0.511647	0.662	0.493	1.91946e-71
Svil	2.24179e-75	0.478924	0.241	0.095	3.83032e-71
Pla2g7	5.198e-75	0.530186	0.427	0.225	8.8813e-71
Myo1g	6.38709e-74	0.630759	0.439	0.263	1.0913e-69
Cks2	1.05954e-73	0.651805	0.391	0.209	1.81034e-69
Rpl34	1.89879e-73	0.237874	0.992	0.895	3.24427e-69
Tmem50a	1.93831e-72	0.457896	0.691	0.525	3.3118e-68
Eif3f	3.41932e-72	0.37671	0.83	0.718	5.84225e-68
Ccr2	6.09058e-72	0.655547	0.537	0.347	1.04064e-67
Capzb	2.47317e-71	0.429409	0.831	0.644	4.22565e-67
Cdc42ep3	3.17519e-71	0.461874	0.3	0.136	5.42514e-67
Ccdc12	9.0207e-71	0.482782	0.682	0.521	1.54128e-66
Rps29	1.30922e-70	0.232991	0.986	0.894	2.23694e-66
Snrpb	2.72763e-70	0.428831	0.757	0.591	4.66043e-66
Mcl1	4.37548e-69	0.43424	0.758	0.595	7.47594e-65
Klf3	1.03518e-68	0.481743	0.452	0.262	1.76871e-64
Gnb2	4.17377e-68	0.409193	0.793	0.616	7.13131e-64
Cd300c2	7.78834e-68	0.57294	0.568	0.373	1.33072e-63
Lcp2	3.71982e-67	0.495122	0.358	0.191	6.35568e-63
Stk38	6.70568e-67	0.518118	0.369	0.198	1.14573e-62
Myo1f	1.50907e-66	0.535617	0.443	0.28	2.5784e-62
Vim	2.35149e-66	0.493141	0.803	0.628	4.01775e-62
Tgfb1	2.54929e-66	0.500138	0.598	0.436	4.35572e-62
Rpl26	9.25401e-66	0.221512	0.992	0.893	1.58114e-61
Bach1	1.50376e-65	0.510574	0.327	0.168	2.56933e-61
Herc4	6.67527e-65	0.421214	0.246	0.104	1.14054e-60
Idh1	1.09861e-64	0.468777	0.273	0.128	1.87708e-60
B2m	1.49249e-64	0.245833	0.995	0.896	2.55007e-60
Lamp1	2.23803e-64	0.236675	0.8	0.536	3.8239e-60
Ets2	2.80913e-64	0.43064	0.282	0.128	4.79967e-60
Lrp1	3.26216e-64	0.500561	0.384	0.214	5.57373e-60
Stap1	1.51951e-63	0.625445	0.395	0.226	2.59623e-59
Gng5	1.56516e-63	0.354342	0.878	0.705	2.67423e-59
Susd3	2.72138e-63	0.516413	0.348	0.19	4.64976e-59
Cox7a2l	3.41973e-62	0.390509	0.781	0.65	5.84296e-58
Ahnak	4.27469e-62	0.493523	0.66	0.502	7.30374e-58
Tnfrsf21	8.14539e-62	0.40581	0.202	0.081	1.39172e-57
Rps11	1.10819e-61	0.222382	0.992	0.892	1.89346e-57
Sirpa	1.56112e-61	0.446508	0.509	0.325	2.66733e-57
Rac1	9.61165e-61	0.387527	0.773	0.618	1.64225e-56
Ramp1	1.26641e-60	0.465239	0.356	0.195	2.16378e-56
Plod3	2.1281e-60	0.445336	0.23	0.1	3.63606e-56
Metrnl	3.12536e-60	0.429594	0.61	0.411	5.33999e-56
1110008F13Rik	7.0973e-60	0.464393	0.595	0.45	1.21265e-55
Ptpn1	4.73239e-59	0.509682	0.518	0.363	8.08576e-55
Ptprj	4.76441e-59	0.479991	0.302	0.154	8.14047e-55
Arpc3	6.89173e-59	0.331295	0.87	0.722	1.17752e-54
Lamtor4	8.3894e-59	0.47661	0.553	0.39	1.43341e-54
Serf2	1.13042e-58	0.286537	0.947	0.82	1.93144e-54
Slfn2	7.20033e-58	0.389076	0.693	0.522	1.23025e-53
Scarb1	1.10054e-57	0.463808	0.252	0.12	1.88038e-53
Ywhaz	1.64145e-57	0.48437	0.587	0.435	2.80459e-53
Pkm	1.45977e-56	0.345275	0.739	0.56	2.49416e-52
Tlr7	1.50416e-56	0.438459	0.202	0.083	2.57002e-52
Pdlim1	3.49512e-56	0.383743	0.265	0.124	5.97177e-52
Vsir	3.83764e-56	0.437589	0.515	0.351	6.557e-52
Nedd9	4.12284e-56	0.379323	0.267	0.123	7.04428e-52
Ostf1	5.04468e-56	0.350238	0.77	0.602	8.61934e-52
Lrrfip1	6.1293e-56	0.511739	0.516	0.367	1.04725e-51
Rps25	1.32371e-55	0.204695	0.991	0.89	2.2617e-51
Mef2a	3.03224e-55	0.513132	0.406	0.252	5.18088e-51
Scp2	4.04598e-55	0.435258	0.637	0.496	6.91296e-51
Fam96a	4.64001e-55	0.457314	0.532	0.385	7.92792e-51
Pabpc1	7.5907e-55	0.295299	0.858	0.75	1.29695e-50
Rpl37	1.29257e-54	0.21019	0.982	0.891	2.20848e-50
Pomp	5.96137e-54	0.35867	0.77	0.599	1.01856e-49
Atf3	6.79699e-54	0.428735	0.667	0.485	1.16133e-49
Ptpn6	9.46569e-54	0.439575	0.595	0.444	1.61731e-49
Anxa2	2.6045e-53	0.316846	0.758	0.544	4.45004e-49
Ppp2r5a	1.12034e-52	0.457543	0.38	0.229	1.91422e-48
Ptpn12	1.88522e-52	0.432308	0.209	0.091	3.22109e-48
Stk24	2.18924e-52	0.453654	0.48	0.325	3.74054e-48
Mia2	8.73735e-52	0.44941	0.456	0.309	1.49286e-47
Wfdc17	1.13435e-51	0.384354	0.644	0.454	1.93815e-47
Sorl1	1.62448e-51	0.301048	0.258	0.119	2.77559e-47
Fis1	2.43419e-51	0.408412	0.638	0.517	4.15906e-47
Eno1	5.65155e-51	0.446049	0.492	0.343	9.65624e-47
Xdh	5.44666e-50	0.392706	0.232	0.11	9.30617e-46
Zfp36l2	8.31303e-50	0.316373	0.691	0.533	1.42036e-45
Ypel3	1.04462e-49	0.329859	0.541	0.365	1.78484e-45
Btg1	1.05856e-49	0.212862	0.884	0.756	1.80865e-45
Fam111a	2.30403e-49	0.421849	0.427	0.276	3.93667e-45
Rpl24	2.64674e-49	0.213046	0.969	0.876	4.52221e-45
Cib1	3.60944e-49	0.429272	0.366	0.223	6.16708e-45
Gstm1	5.08236e-49	0.345282	0.3	0.157	8.68371e-45
Ncf4	7.75738e-48	0.429324	0.446	0.3	1.32543e-43
Atp5c1	9.77044e-48	0.38006	0.698	0.578	1.66938e-43
Ndufa6	2.09541e-47	0.350431	0.719	0.594	3.58022e-43
Eif3k	2.44137e-47	0.323602	0.776	0.663	4.17133e-43
Adipor1	2.72206e-47	0.417801	0.502	0.369	4.65091e-43
Brk1	5.30251e-47	0.361205	0.679	0.546	9.05987e-43
Bcl10	8.56914e-47	0.403514	0.467	0.325	1.46412e-42
Aprt	9.22515e-47	0.361737	0.566	0.405	1.57621e-42
Irf5	1.28943e-46	0.444327	0.513	0.375	2.20312e-42
Wsb1	1.97084e-46	0.423935	0.464	0.314	3.36737e-42
Serinc3	2.59533e-46	0.223303	0.767	0.617	4.43438e-42
Iqgap1	2.86583e-46	0.357397	0.764	0.625	4.89656e-42
Stat3	4.51542e-46	0.418656	0.462	0.315	7.71504e-42
Kdm7a	6.32474e-46	0.414912	0.363	0.219	1.08064e-41
Sec61g	1.19753e-45	0.33847	0.772	0.665	2.0461e-41
Ptk2b	3.73469e-45	0.409315	0.306	0.17	6.38109e-41
Capza2	8.27125e-45	0.337867	0.72	0.576	1.41323e-40
Gyg	2.4635e-44	0.363396	0.317	0.186	4.20913e-40
Ppp1r15b	2.01842e-43	0.413519	0.27	0.147	3.44867e-39
Sec61b	3.09064e-43	0.321899	0.774	0.658	5.28066e-39
Ucp2	5.3865e-43	0.329654	0.721	0.573	9.20338e-39
Atp1a1	1.96874e-42	0.495768	0.492	0.375	3.36379e-38
Foxn3	2.8037e-42	0.369259	0.38	0.235	4.7904e-38
Nab1	2.84473e-42	0.462948	0.293	0.169	4.8605e-38
Rassf4	3.97966e-42	0.45597	0.446	0.317	6.79965e-38
Rpl36al	8.88913e-42	0.387911	0.606	0.493	1.5188e-37
Fam129a	9.31763e-42	0.405644	0.298	0.174	1.59201e-37
Ifi204	2.54425e-41	0.304305	0.465	0.309	4.3471e-37
Mettl9	4.84176e-41	0.379335	0.287	0.167	8.27263e-37
Ptp4a1	4.05384e-40	0.434659	0.405	0.278	6.9264e-36
Mapkapk2	5.74842e-40	0.463684	0.353	0.231	9.82176e-36
Atp5h	8.84651e-40	0.273181	0.841	0.716	1.51151e-35
Nfkbia	9.54694e-40	0.251366	0.83	0.655	1.63119e-35
2010107E04Rik	2.05365e-38	0.338643	0.724	0.616	3.50887e-34
Ccnd3	2.26026e-38	0.35091	0.396	0.259	3.86189e-34
Cebpd	3.15123e-38	0.304244	0.259	0.14	5.38419e-34
Atp6v0b	3.53296e-38	0.27262	0.727	0.568	6.03642e-34
Arl6ip5	4.04815e-38	0.358204	0.55	0.433	6.91666e-34
Glipr1	4.2915e-38	0.391369	0.478	0.348	7.33245e-34
Laptm5	1.05182e-37	0.277914	0.869	0.691	1.79713e-33
Rnf130	1.27367e-37	0.387864	0.497	0.374	2.17619e-33
Cmtm7	1.68916e-37	0.358182	0.541	0.419	2.8861e-33
Cmpk1	2.21384e-37	0.342592	0.562	0.447	3.78256e-33
Cd47	3.23069e-37	0.279308	0.776	0.637	5.51996e-33
Plcg2	7.05561e-37	0.352107	0.25	0.141	1.20552e-32
Eif3h	2.47353e-36	0.276424	0.746	0.648	4.22627e-32
Tmem51	3.65543e-36	0.51045	0.305	0.195	6.24567e-32
Cdkn2d	6.26005e-36	0.331779	0.315	0.188	1.06959e-31
Uqcrfs1	1.13638e-35	0.335607	0.581	0.472	1.94161e-31
Tet2	1.16382e-35	0.358472	0.206	0.105	1.98851e-31
Atp6v1e1	1.17505e-35	0.375952	0.482	0.365	2.00769e-31
Mfsd14b	2.77063e-35	0.333732	0.211	0.11	4.7339e-31
Hacd4	5.19849e-35	0.325562	0.31	0.187	8.88213e-31
Npc2	1.12862e-34	0.214963	0.833	0.673	1.92836e-30
Rpl10-ps3	1.20246e-34	0.35527	0.44	0.316	2.05453e-30
Btf3	1.74065e-34	0.234996	0.866	0.785	2.97408e-30
Use1	4.19957e-34	0.314479	0.612	0.51	7.17538e-30
Naca	1.48599e-33	0.211073	0.895	0.812	2.53896e-29
Cox6b1	1.8872e-33	0.257597	0.815	0.681	3.22448e-29
Pirb	2.06503e-33	0.405574	0.418	0.307	3.5283e-29
Ly86	2.94302e-33	0.285156	0.633	0.493	5.02845e-29
Nfkb1	4.45107e-33	0.332159	0.436	0.31	7.6051e-29
Zfp36	4.95752e-33	0.271644	0.672	0.543	8.47042e-29
Acer3	5.44473e-33	0.414931	0.315	0.21	9.30287e-29
Tmpo	7.44847e-33	0.333287	0.384	0.259	1.27265e-28
Csf2ra	1.00978e-32	0.394313	0.381	0.274	1.72531e-28
Arl5c	1.60257e-32	0.242043	0.312	0.186	2.73814e-28
Ethe1	2.57803e-32	0.37266	0.272	0.167	4.40482e-28
Ttc7	4.6782e-32	0.362469	0.267	0.16	7.99317e-28
Cd53	8.64858e-32	0.258701	0.763	0.634	1.4777e-27
Asap1	9.55718e-32	0.406455	0.367	0.258	1.63294e-27
Fam174a	1.01874e-31	0.37323	0.42	0.312	1.74062e-27
Prdx6	1.19383e-31	0.290321	0.471	0.35	2.03977e-27
Ndel1	2.32641e-31	0.335709	0.387	0.276	3.97491e-27
Cdc42	2.88025e-31	0.235884	0.869	0.726	4.9212e-27
Fcho2	3.11871e-31	0.362918	0.251	0.147	5.32863e-27
Vamp8	3.3272e-31	0.276787	0.718	0.584	5.68486e-27
Diaph1	3.68012e-31	0.383876	0.415	0.309	6.28785e-27
Mcub	3.6918e-31	0.384215	0.393	0.283	6.30781e-27
Arf5	3.97598e-31	0.291624	0.714	0.616	6.79337e-27
Atp1b3	5.78395e-31	0.308722	0.495	0.385	9.88245e-27
Tmed5	8.42929e-31	0.40225	0.471	0.368	1.44023e-26
Ggh	1.56238e-30	0.371705	0.354	0.247	2.66949e-26
Hfe	2.28034e-30	0.546937	0.299	0.197	3.89619e-26
Clec12a	4.6619e-30	0.288683	0.489	0.361	7.96531e-26
Pgd	6.17375e-30	0.378675	0.333	0.229	1.05485e-25
Anp32a	1.17784e-29	0.406095	0.563	0.469	2.01246e-25
Nuak2	2.26025e-29	0.388824	0.249	0.152	3.86187e-25
Khk	2.37484e-29	0.297381	0.203	0.113	4.05766e-25
Gpx4	5.31369e-29	0.236335	0.706	0.584	9.07897e-25
Lyl1	1.67338e-28	0.317806	0.227	0.131	2.85913e-24
Atp5e	1.72579e-28	0.228721	0.824	0.719	2.94869e-24
Tmem14c	2.25749e-28	0.310689	0.547	0.448	3.85715e-24
Dazap2	2.36594e-28	0.2886	0.598	0.502	4.04245e-24
Rassf5	2.99935e-28	0.360999	0.247	0.148	5.1247e-24
Tab2	3.36731e-28	0.369515	0.319	0.216	5.75339e-24
Zyx	5.71619e-28	0.311178	0.44	0.336	9.76669e-24
Plxnb2	7.32913e-28	0.374244	0.247	0.154	1.25225e-23
Ms4a6b	8.76259e-28	0.260182	0.522	0.384	1.49718e-23
Mtpn	3.63959e-27	0.395039	0.447	0.361	6.2186e-23
Rasa3	6.23e-27	0.276393	0.248	0.149	1.06446e-22
Il10ra	1.33943e-26	0.393653	0.252	0.158	2.28855e-22
Cebpz	3.38802e-26	0.342694	0.322	0.22	5.78877e-22
Rbms1	3.57688e-26	0.313188	0.507	0.41	6.11146e-22
Id3	3.93514e-26	0.271292	0.242	0.14	6.72358e-22
Fam105a	4.2769e-26	0.3438	0.459	0.365	7.30751e-22
Tgm2	5.13512e-26	0.49685	0.202	0.118	8.77386e-22
Sephs2	9.39659e-26	0.291513	0.215	0.126	1.6055e-21
Cd300ld	9.97779e-26	0.528145	0.27	0.179	1.70481e-21
Mpc2	1.14777e-25	0.337709	0.508	0.425	1.96109e-21
Chmp2b	1.36007e-25	0.38946	0.239	0.152	2.32382e-21
Scand1	1.41926e-25	0.287791	0.555	0.467	2.42495e-21
Cops9	1.42326e-25	0.299464	0.575	0.484	2.43178e-21
Ppp2r5c	3.22341e-25	0.375231	0.307	0.215	5.50751e-21
Cox7c	4.57191e-25	0.230585	0.823	0.718	7.81156e-21
Zbtb7a	4.86099e-25	0.381155	0.374	0.28	8.30548e-21
Cox6c	5.82445e-25	0.220282	0.807	0.696	9.95165e-21
Myadm	1.0211e-24	0.307963	0.363	0.266	1.74465e-20
Ube2d3	1.55478e-24	0.234496	0.776	0.699	2.65649e-20
Bnip3l	1.62065e-24	0.249369	0.504	0.404	2.76904e-20
Ddx3x	2.2134e-24	0.29047	0.48	0.384	3.78181e-20
Ehbp1l1	2.675e-24	0.393057	0.303	0.217	4.57051e-20
Rel	3.37953e-24	0.301141	0.523	0.413	5.77426e-20
Arpc4	3.51971e-24	0.324615	0.505	0.428	6.01378e-20
Lims1	5.51701e-24	0.36669	0.368	0.281	9.42637e-20
Rhog	6.3515e-24	0.329962	0.399	0.313	1.08522e-19
Akap13	6.69435e-24	0.231752	0.511	0.403	1.1438e-19
D1Ertd622e	7.80896e-24	0.32901	0.321	0.228	1.33424e-19
D8Ertd738e	8.27844e-24	0.208512	0.697	0.611	1.41445e-19
Rassf3	1.17133e-23	0.301843	0.215	0.128	2.00133e-19
Ubl3	1.23321e-23	0.295614	0.515	0.424	2.10707e-19
Raf1	1.60376e-23	0.352343	0.247	0.16	2.74019e-19
Crk	1.7348e-23	0.305798	0.234	0.148	2.96407e-19
Slc11a1	1.81438e-23	0.326859	0.348	0.242	3.10004e-19
Sema4d	2.41875e-23	0.337544	0.309	0.217	4.13268e-19
Eif4g3	3.11351e-23	0.344489	0.276	0.187	5.31975e-19
Lrrc25	5.75774e-23	0.320367	0.419	0.323	9.83768e-19
Ctsa	6.2165e-23	0.224879	0.543	0.418	1.06215e-18
Zfp706	6.87471e-23	0.28473	0.533	0.45	1.17461e-18
Eif4ebp1	1.25993e-22	0.325814	0.356	0.27	2.15271e-18
Klf10	2.36531e-22	0.315868	0.232	0.146	4.04138e-18
Ccdc88a	2.66178e-22	0.298503	0.357	0.264	4.54792e-18
Lair1	2.83416e-22	0.425358	0.259	0.175	4.84245e-18
Arpc5	3.21464e-22	0.212529	0.761	0.658	5.49254e-18
Nlrp3	3.28624e-22	0.229315	0.218	0.131	5.61487e-18
Ndufa1	5.82135e-22	0.263743	0.544	0.467	9.94635e-18
Lamp2	8.88448e-22	0.27325	0.501	0.403	1.518e-17
Anxa1	1.11221e-21	0.247765	0.535	0.417	1.90031e-17
Tspan14	1.11572e-21	0.304439	0.205	0.127	1.90632e-17
Jarid2	1.71681e-21	0.344223	0.271	0.184	2.93335e-17
Lnpep	1.80347e-21	0.300173	0.301	0.212	3.08142e-17
Atp6v1f	1.81675e-21	0.216025	0.715	0.615	3.10409e-17
Gpi1	2.37547e-21	0.31051	0.505	0.432	4.05873e-17
Eif3e	3.83466e-21	0.234478	0.636	0.565	6.5519e-17
Mtdh	4.23084e-21	0.29955	0.542	0.466	7.22882e-17
Zeb2os	4.61637e-21	0.275041	0.248	0.163	7.88753e-17
Sh3glb1	5.00227e-21	0.228102	0.662	0.564	8.54688e-17
Acot9	5.34575e-21	0.324717	0.212	0.136	9.13376e-17
Ndufb3	6.41134e-21	0.276914	0.496	0.419	1.09544e-16
Asah1	7.96653e-21	0.31698	0.435	0.359	1.36116e-16
Ankrd44	1.02519e-20	0.225828	0.354	0.254	1.75164e-16
Selenok	1.07562e-20	0.212441	0.73	0.655	1.8378e-16
Cd48	1.09331e-20	0.235848	0.577	0.481	1.86802e-16
Sgk3	1.15587e-20	0.326953	0.261	0.181	1.97492e-16
Rsrp1	1.20566e-20	0.227374	0.646	0.565	2.05999e-16
Tmem258	1.2372e-20	0.256001	0.532	0.453	2.11388e-16
Kdm6b	1.75452e-20	0.264218	0.409	0.308	2.99777e-16
Arf1	2.85708e-20	0.236024	0.645	0.567	4.8816e-16
Arhgef1	3.56761e-20	0.286657	0.346	0.252	6.09562e-16
Elmo2	4.11578e-20	0.309155	0.209	0.135	7.03222e-16
Nsa2	5.22757e-20	0.274648	0.511	0.435	8.93183e-16
Higd2a	6.30685e-20	0.269354	0.437	0.358	1.07759e-15
Kras	7.92314e-20	0.302665	0.387	0.304	1.35375e-15
Siva1	1.18249e-19	0.327273	0.307	0.227	2.02041e-15
Znhit1	2.20986e-19	0.376371	0.312	0.239	3.77577e-15
Ost4	2.39147e-19	0.238412	0.64	0.571	4.08606e-15
Srp9	2.59114e-19	0.226343	0.633	0.564	4.42723e-15
Itch	3.54146e-19	0.258965	0.205	0.128	6.05093e-15
BC005537	5.67801e-19	0.219692	0.52	0.429	9.70145e-15
Rassf1	5.76593e-19	0.294273	0.351	0.271	9.85167e-15
Ndufb10	6.72467e-19	0.261604	0.533	0.468	1.14898e-14
Bri3bp	1.20407e-18	0.306373	0.225	0.151	2.05727e-14
Uqcrq	1.30608e-18	0.228352	0.637	0.548	2.23157e-14
Sap30	1.43119e-18	0.304067	0.354	0.276	2.44533e-14
Pdha1	2.51321e-18	0.280648	0.237	0.162	4.29406e-14
Ccnl1	2.58637e-18	0.214945	0.635	0.551	4.41907e-14
Asph	2.77445e-18	0.372455	0.228	0.156	4.74043e-14
Arhgap30	3.84012e-18	0.296129	0.462	0.387	6.56122e-14
Rpl7a	4.08304e-18	0.23271	0.64	0.591	6.97628e-14
Apobec1	4.35306e-18	0.271572	0.321	0.237	7.43765e-14
N4bp2l1	4.62222e-18	0.228481	0.214	0.137	7.89753e-14
Ywhab	5.79875e-18	0.291173	0.492	0.432	9.90774e-14
Sgms1	5.99744e-18	0.311365	0.232	0.156	1.02472e-13
Chmp2a	9.89933e-18	0.224174	0.559	0.483	1.6914e-13
Pbxip1	1.03364e-17	0.320788	0.242	0.165	1.76608e-13
Ist1	1.04531e-17	0.296018	0.219	0.147	1.78601e-13
Rilpl2	1.17697e-17	0.208797	0.48	0.392	2.01097e-13
Hcls1	1.26876e-17	0.249601	0.525	0.445	2.16781e-13
Ndufa11	2.32504e-17	0.268504	0.459	0.395	3.97256e-13
Ifi207	2.47655e-17	0.229637	0.469	0.377	4.23144e-13
Cdkn1b	2.71707e-17	0.244996	0.238	0.159	4.64239e-13
Mpp1	2.92212e-17	0.316036	0.338	0.259	4.99274e-13
Xbp1	3.83172e-17	0.317909	0.354	0.287	6.54688e-13
Ppp1cb	5.29879e-17	0.348429	0.366	0.299	9.05351e-13
Cast	6.67022e-17	0.222503	0.305	0.226	1.13967e-12
Trib1	6.97051e-17	0.205619	0.309	0.231	1.19098e-12
Milr1	1.10622e-16	0.296498	0.252	0.181	1.89009e-12
St3gal4	1.92613e-16	0.293524	0.23	0.162	3.29099e-12
Rgcc	3.06222e-16	0.223307	0.295	0.207	5.2321e-12
Man2b1	4.19711e-16	0.241462	0.455	0.376	7.17117e-12
Hipk1	6.67112e-16	0.233105	0.222	0.149	1.13983e-11
Gpr132	8.14864e-16	0.228753	0.301	0.221	1.39228e-11
Pcbp2	1.04136e-15	0.204639	0.652	0.591	1.77927e-11
Snx20	1.62497e-15	0.278821	0.414	0.347	2.77642e-11
Sft2d1	1.81612e-15	0.230507	0.229	0.16	3.10302e-11
Ssr3	3.91959e-15	0.282893	0.395	0.333	6.69701e-11
Atp6v1b2	4.51668e-15	0.21811	0.394	0.318	7.71719e-11
Pip4k2a	5.20825e-15	0.337121	0.305	0.241	8.89882e-11
Ptbp3	5.36604e-15	0.227116	0.499	0.435	9.16842e-11
Pid1	6.60484e-15	0.22146	0.429	0.352	1.1285e-10
Picalm	7.9234e-15	0.269345	0.377	0.315	1.35379e-10
Oaz2	8.99447e-15	0.271022	0.213	0.149	1.5368e-10
Tpgs1	9.44203e-15	0.246848	0.224	0.16	1.61327e-10
Dram2	1.09661e-14	0.277105	0.22	0.157	1.87366e-10
Slk	1.19528e-14	0.261976	0.273	0.207	2.04225e-10
Grk2	1.56236e-14	0.263407	0.333	0.264	2.66945e-10
Cnppd1	1.76283e-14	0.261302	0.264	0.197	3.01197e-10
Pqlc1	2.07081e-14	0.294889	0.204	0.144	3.53818e-10
Clec4a2	2.15089e-14	0.244242	0.366	0.283	3.67502e-10
Sf3b6	2.18378e-14	0.247741	0.526	0.479	3.73121e-10
Pcf11	2.28057e-14	0.260937	0.269	0.2	3.89659e-10
Tmem160	2.45476e-14	0.244119	0.509	0.456	4.19421e-10
Tifa	3.25637e-14	0.303942	0.226	0.165	5.56383e-10
Ifnar2	3.83695e-14	0.287959	0.305	0.243	6.55581e-10
Ndufa7	7.70131e-14	0.20919	0.612	0.556	1.31585e-09
Notch2	7.73525e-14	0.274492	0.206	0.141	1.32164e-09
Ggnbp2	9.82242e-14	0.244309	0.339	0.275	1.67826e-09
Actr2	1.77864e-13	0.217277	0.544	0.489	3.03899e-09
Bola2	2.17834e-13	0.286879	0.411	0.355	3.72191e-09
Dstn	2.52816e-13	0.257963	0.339	0.276	4.31961e-09
Polb	2.75884e-13	0.29027	0.241	0.182	4.71375e-09
Capns1	2.85942e-13	0.206056	0.569	0.503	4.8856e-09
Ube2f	5.85241e-13	0.285421	0.323	0.268	9.99942e-09
Pmaip1	6.18382e-13	0.217531	0.339	0.263	1.05657e-08
Fes	7.04968e-13	0.273792	0.239	0.182	1.20451e-08
Ndufa3	8.11743e-13	0.20613	0.501	0.455	1.38694e-08
Dock2	8.46089e-13	0.202485	0.363	0.298	1.44563e-08
Sgk1	9.35818e-13	0.253671	0.258	0.194	1.59894e-08
Tm6sf1	1.19574e-12	0.227045	0.417	0.357	2.04304e-08
Mapk14	1.2163e-12	0.246939	0.259	0.199	2.07817e-08
Fem1c	1.4336e-12	0.256873	0.209	0.151	2.44945e-08
Ppp1r2	1.4561e-12	0.216301	0.357	0.298	2.48789e-08
Socs3	1.47656e-12	0.243735	0.288	0.219	2.52286e-08
Iscu	1.50031e-12	0.211716	0.426	0.378	2.56343e-08
Gapdh	1.62354e-12	0.214353	0.581	0.516	2.77397e-08
Dusp3	2.16439e-12	0.32133	0.279	0.224	3.69808e-08
Dock8	2.35864e-12	0.215856	0.271	0.208	4.02997e-08
Pgk1	2.52478e-12	0.224563	0.447	0.39	4.31383e-08
Cbfa2t3	2.78138e-12	0.325539	0.27	0.207	4.75226e-08
Nptn	4.13823e-12	0.261062	0.401	0.356	7.07057e-08
Sfr1	4.8218e-12	0.234858	0.479	0.432	8.23854e-08
Ndufb7	5.26891e-12	0.212181	0.565	0.513	9.00245e-08
Casp1	6.27902e-12	0.251428	0.238	0.182	1.07283e-07
Nrros	6.7222e-12	0.271943	0.426	0.373	1.14856e-07
Soat1	6.81107e-12	0.239931	0.264	0.206	1.16374e-07
Casp4	8.44462e-12	0.222495	0.239	0.179	1.44285e-07
Cdc40	1.14455e-11	0.21745	0.216	0.158	1.95559e-07
Gch1	1.45015e-11	0.255251	0.3	0.24	2.47773e-07
Tor1a	1.60592e-11	0.260217	0.262	0.21	2.74387e-07
Bscl2	1.69321e-11	0.272275	0.263	0.21	2.89302e-07
Tmem128	1.94495e-11	0.258388	0.266	0.211	3.32314e-07
Smc6	2.08346e-11	0.423027	0.382	0.342	3.55981e-07
Tgif1	2.11714e-11	0.21377	0.366	0.302	3.61735e-07
B4galnt1	2.68074e-11	0.213514	0.322	0.259	4.58031e-07
Hspa1b	2.68147e-11	0.399862	0.26	0.198	4.58157e-07
Api5	2.92765e-11	0.235112	0.208	0.155	5.00218e-07
Tmem234	2.94056e-11	0.234748	0.461	0.421	5.02425e-07
Cln8	3.74655e-11	0.275762	0.221	0.169	6.40136e-07
Sbno2	4.2927e-11	0.211512	0.274	0.214	7.33451e-07
Camk2d	4.98362e-11	0.221327	0.291	0.23	8.51501e-07
Arhgap9	5.22525e-11	0.256587	0.312	0.258	8.92787e-07
Zmiz1	5.71113e-11	0.277932	0.283	0.232	9.75803e-07
Fcgr4	8.23626e-11	0.375582	0.232	0.179	1.40725e-06
Tor1aip1	1.01605e-10	0.206233	0.423	0.374	1.73603e-06
Rnpep	1.44085e-10	0.25984	0.287	0.238	2.46184e-06
Ier3ip1	2.59307e-10	0.222979	0.433	0.397	4.43053e-06
Map2k1	3.15093e-10	0.237759	0.289	0.238	5.38368e-06
Pnrc2	3.16061e-10	0.212001	0.242	0.188	5.40022e-06
Abi1	3.29377e-10	0.263058	0.326	0.28	5.62773e-06
Cbl	3.33938e-10	0.248923	0.305	0.255	5.70566e-06
Coro1b	3.78762e-10	0.223426	0.423	0.383	6.47152e-06
Cope	3.9782e-10	0.204973	0.447	0.409	6.79715e-06
Plec	5.87617e-10	0.243065	0.209	0.16	1.004e-05
Fam46a	1.14693e-09	0.258678	0.288	0.233	1.95965e-05
Ube2a	1.16958e-09	0.230002	0.392	0.353	1.99834e-05
Cdc42se1	1.20977e-09	0.215556	0.333	0.286	2.06701e-05
Tuba1c	1.21602e-09	0.254396	0.286	0.238	2.07768e-05
Tmbim4	1.74132e-09	0.212462	0.373	0.331	2.97522e-05
Sppl2a	1.81862e-09	0.262627	0.275	0.229	3.1073e-05
Pak1ip1	2.20869e-09	0.236022	0.251	0.204	3.77376e-05
Gtf2b	3.36162e-09	0.204363	0.288	0.24	5.74366e-05
Unc119	3.61214e-09	0.240415	0.273	0.22	6.17171e-05
Gsdmd	8.05929e-09	0.273574	0.238	0.197	0.000137701
Acaa2	1.73105e-08	0.216944	0.23	0.188	0.000295768
Mob1a	3.1185e-08	0.232075	0.332	0.295	0.000532828
Ifngr2	5.71627e-08	0.217619	0.327	0.291	0.000976681
Ogfrl1	6.28926e-08	0.255528	0.241	0.2	0.00107458
Gm6377	6.97723e-08	0.24985	0.227	0.182	0.00119213
Mafg	7.56725e-08	0.249884	0.23	0.19	0.00129294
Clip1	9.47276e-08	0.225118	0.202	0.16	0.00161852
Xiap	1.15989e-07	0.21901	0.214	0.172	0.00198178
Rab32	1.19397e-07	0.233564	0.206	0.167	0.00204001
Parl	1.37124e-07	0.252627	0.243	0.207	0.0023429
Itgb1	1.474e-07	0.230519	0.437	0.409	0.00251848
Echs1	2.67236e-07	0.217987	0.22	0.182	0.00456599
Prkx	3.09121e-07	0.2066	0.206	0.166	0.00528165
Cnih4	3.18745e-07	0.22469	0.377	0.351	0.00544609
Hspa1a	3.23409e-07	0.310557	0.425	0.37	0.00552577
Rnf19b	4.70659e-07	0.246609	0.205	0.166	0.00804168
Mier1	5.92454e-07	0.201303	0.289	0.249	0.0101227
Mapk3	7.04552e-07	0.253018	0.254	0.223	0.012038
Tm2d2	1.03489e-06	0.221473	0.305	0.277	0.0176821
Pts	1.37772e-06	0.2115	0.21	0.173	0.0235398
2022-09-09	2.29545e-06	0.247086	0.275	0.246	0.03922
C1d	2.97926e-06	0.225623	0.292	0.266	0.0509036
Trappc6a	4.88099e-06	0.215194	0.234	0.202	0.0833966
Capza1	4.93079e-06	0.202544	0.357	0.335	0.0842475
Lfng	6.54765e-06	0.20859	0.243	0.209	0.111873
Tep1	1.2205e-05	0.200062	0.27	0.242	0.208534
Map3k8	1.23488e-05	0.219083	0.253	0.221	0.210991
Ralb	1.41595e-05	0.224759	0.23	0.205	0.241928
Cd2ap	1.85405e-05	0.201905	0.231	0.201	0.316783
Sh3bgrl	2.15986e-05	0.202832	0.411	0.396	0.369033
Snrpb2	2.17894e-05	0.207693	0.348	0.334	0.372293
Trappc1	3.73645e-05	0.209525	0.302	0.286	0.63841
Chmp3	7.12548e-05	0.207473	0.258	0.236	1
Rsu1	0.000108083	0.20189	0.322	0.306	1
Magt1	0.00013225	0.253308	0.264	0.247	1
Capn2	0.0092229	0.204	0.251	0.244	1
Akt1	0.00932693	0.219617	0.218	0.21	1
Cd9	0.116284	0.304428	0.342	0.362	1
Hmox1	0.201768	0.245924	0.269	0.263	1

## Sheet: MAC3
	p_val	avg_logFC	pct.1	pct.2	p_val_adj
Chil3	0	2.13221	0.69	0.108	0
Cxcl10	0	2.06451	0.392	0.08	0
Ccl7	0	1.89522	0.623	0.188	0
Ccl2	0	1.88137	0.845	0.258	0
Fcgr1	0	1.70326	0.897	0.233	0
Ms4a4c	0	1.68724	0.938	0.321	0
Ms4a6d	0	1.68676	0.89	0.245	0
Isg15	0	1.66919	0.872	0.31	0
Clec4e	0	1.66279	0.712	0.099	0
Ifi204	0	1.62689	0.904	0.282	0
Rsad2	0	1.55855	0.579	0.153	0
Plac8	0	1.50365	0.9	0.368	0
Ly6c2	0	1.44497	0.753	0.215	0
Hmox1	0	1.44301	0.713	0.236	0
Ccl9	0	1.42511	0.928	0.381	0
Cstb	0	1.41651	0.979	0.491	0
Ifitm3	0	1.41257	0.998	0.545	0
F10	0	1.3817	0.561	0.074	0
Il1rn	0	1.36924	0.558	0.116	0
Ninj1	0	1.34028	0.871	0.317	0
Clec4d	0	1.3387	0.841	0.219	0
Ifit3	0	1.31705	0.504	0.136	0
Msr1	0	1.26747	0.705	0.137	0
Cebpb	0	1.261	0.979	0.459	0
Cxcl2	0	1.25443	0.744	0.284	0
Lyz2	0	1.25107	0.978	0.433	0
C5ar1	0	1.24977	0.802	0.231	0
Clec4n	0	1.24306	0.543	0.097	0
Rtp4	0	1.22304	0.845	0.263	0
Zbp1	0	1.22278	0.807	0.274	0
Rnh1	0	1.21719	0.913	0.441	0
Ms4a6c	0	1.20793	0.97	0.423	0
Plin2	0	1.20323	0.96	0.39	0
Metrnl	0	1.19748	0.923	0.391	0
Irf7	0	1.16711	0.846	0.327	0
Ccl6	0	1.16379	0.9	0.429	0
Sdcbp	0	1.14199	0.972	0.545	0
Ifi207	0	1.13424	0.884	0.352	0
Slfn5	0	1.12995	0.823	0.306	0
Thbs1	0	1.12133	0.395	0.056	0
Ctsc	0	1.08311	0.922	0.464	0
Ifi209	0	1.07411	0.687	0.251	0
Card19	0	1.05952	0.82	0.35	0
Cd14	0	1.04161	0.726	0.28	0
Hspa5	0	1.0307	0.951	0.64	0
Ms4a6b	0	1.01498	0.861	0.363	0
Dmkn	0	1.0145	0.267	0.019	0
Slfn2	0	1.005	0.934	0.507	0
Anxa2	0	1.00462	0.937	0.532	0
Slfn4	0	1.00033	0.438	0.042	0
Pkm	0	0.9988	0.958	0.546	0
Npc2	0	0.98886	0.99	0.663	0
Prdx5	0	0.986749	0.927	0.512	0
Rgl1	0	0.982169	0.619	0.153	0
Gda	0	0.97101	0.635	0.168	0
Vcan	0	0.968571	0.346	0.013	0
Lgals3	0	0.966511	0.975	0.491	0
Capza2	0	0.961825	0.947	0.561	0
Fcer1g	0	0.952613	0.997	0.609	0
Rab20	0	0.946827	0.569	0.124	0
H3f3b	0	0.946156	0.997	0.89	0
Pnp	0	0.94332	0.764	0.343	0
Mafb	0	0.93907	0.732	0.246	0
Eif4a1	0	0.933478	0.969	0.674	0
Ifitm6	0	0.928116	0.63	0.189	0
Sat1	0	0.924747	0.975	0.627	0
Ctsz	0	0.91873	0.98	0.558	0
Capg	0	0.915989	0.936	0.373	0
Oasl2	0	0.906037	0.624	0.175	0
Cd68	0	0.905842	0.965	0.439	0
Slpi	0	0.898222	0.469	0.09	0
Ifi211	0	0.895743	0.546	0.155	0
Slamf8	0	0.894514	0.567	0.187	0
Lgmn	0	0.880216	0.904	0.419	0
Clec4a1	0	0.851079	0.71	0.25	0
Tor3a	0	0.848608	0.606	0.197	0
Klra2	0	0.848432	0.465	0.065	0
Por	0	0.84581	0.57	0.171	0
Lilr4b	0	0.842111	0.818	0.327	0
Lrrc25	0	0.840536	0.741	0.303	0
Ifitm2	0	0.81937	0.952	0.527	0
S100a4	0	0.815323	0.895	0.411	0
Cd44	0	0.812652	0.824	0.395	0
Clec4a3	0	0.811407	0.737	0.285	0
Hp	0	0.807464	0.486	0.076	0
Ptafr	0	0.806162	0.603	0.197	0
Hck	0	0.803099	0.675	0.257	0
Ftl1	0	0.801964	0.995	0.716	0
S100a6	0	0.798058	0.983	0.566	0
Zeb2	0	0.793367	0.856	0.387	0
Oasl1	0	0.788266	0.383	0.082	0
Slc15a3	0	0.782126	0.588	0.185	0
Tmem106a	0	0.764719	0.693	0.262	0
Slfn1	0	0.757169	0.521	0.126	0
Cd300a	0	0.752425	0.802	0.338	0
Ccr1	0	0.745067	0.491	0.121	0
Emilin2	0	0.710534	0.554	0.171	0
Msrb1	0	0.692481	0.853	0.382	0
Fn1	0	0.690095	0.419	0.082	0
Lst1	0	0.68871	0.915	0.419	0
Sirpb1c	0	0.682562	0.422	0.089	0
Smox	0	0.678596	0.378	0.078	0
Ctsb	0	0.663619	0.972	0.458	0
Gm9733	0	0.599989	0.31	0.053	0
C3	0	0.5885	0.348	0.052	0
Fpr2	0	0.469271	0.212	0.022	0
Bst2	6.93153e-305	0.85015	0.926	0.512	1.18432e-300
Ifi47	1.33705e-304	0.881601	0.509	0.149	2.28448e-300
Sod2	9.26721e-303	1.02901	0.712	0.317	1.58339e-298
Ifi205	1.45325e-301	0.801684	0.441	0.111	2.48302e-297
S100a10	2.47605e-299	1.04278	0.932	0.615	4.23058e-295
Lgals9	4.23552e-299	0.771622	0.638	0.239	7.23681e-295
Arpc1b	5.43671e-299	0.6858	0.984	0.732	9.28916e-295
Vim	5.0825e-296	0.969155	0.951	0.618	8.68396e-292
Fth1	1.55144e-295	1.00879	0.953	0.726	2.65079e-291
Atp6v1b2	1.57942e-294	0.772558	0.713	0.299	2.6986e-290
Cndp2	1.93574e-293	0.836053	0.705	0.292	3.30741e-289
Plek	3.21573e-293	0.843037	0.832	0.422	5.49439e-289
Noct	1.15591e-291	0.551418	0.344	0.072	1.97498e-287
Ifi35	1.0334e-286	0.77854	0.714	0.305	1.76567e-282
Apobec1	3.56483e-283	0.689037	0.613	0.219	6.09086e-279
Anxa5	3.92429e-281	0.787967	0.949	0.538	6.70504e-277
Ctss	1.28563e-278	0.582697	0.992	0.63	2.19663e-274
Ehd1	1.2596e-277	0.784425	0.561	0.194	2.15216e-273
Pid1	2.03244e-277	0.849172	0.732	0.333	3.47263e-273
Cybb	3.46542e-277	0.750214	0.858	0.415	5.92101e-273
C3ar1	7.95706e-276	0.723924	0.632	0.218	1.35954e-271
Emp3	5.51281e-275	0.728789	0.962	0.605	9.41918e-271
Bri3	5.93978e-274	0.8408	0.9	0.537	1.01487e-269
2310022A10Rik	5.30436e-273	0.64106	0.421	0.114	9.06303e-269
Ifi213	1.92257e-272	0.661584	0.398	0.1	3.2849e-268
Pdia6	1.0971e-270	0.797188	0.83	0.413	1.87451e-266
Aif1	1.13526e-270	0.908926	0.809	0.389	1.9397e-266
F13a1	2.20402e-270	0.562176	0.493	0.139	3.76578e-266
Trim30a	1.33323e-269	0.780095	0.7	0.305	2.27795e-265
Tyrobp	2.7255e-269	0.624495	0.995	0.646	4.65679e-265
Parp14	8.1526e-268	0.691715	0.513	0.164	1.39295e-263
Atf3	1.39615e-267	0.766524	0.896	0.471	2.38546e-263
Ly6e	2.01476e-265	0.688766	0.985	0.742	3.44242e-261
Nupr1	6.05108e-264	0.751191	0.446	0.127	1.03389e-259
Rnf213	8.67117e-261	0.673204	0.541	0.187	1.48156e-256
Chmp4b	1.04483e-259	0.76224	0.864	0.488	1.7852e-255
Slc11a1	1.55365e-258	0.632542	0.626	0.225	2.65456e-254
Ier3	4.47947e-258	0.797664	0.719	0.308	7.65362e-254
Ifit1	5.08258e-256	0.935795	0.375	0.094	8.68409e-252
Fyb	3.06594e-255	0.705328	0.828	0.422	5.23847e-251
Rab7b	1.71728e-250	0.723079	0.704	0.299	2.93415e-246
Tgfbi	9.87903e-250	0.944262	0.744	0.357	1.68793e-245
Nceh1	1.99386e-248	0.749706	0.476	0.155	3.40672e-244
Sap30	7.56996e-248	0.76459	0.619	0.259	1.2934e-243
Prdx1	1.50781e-246	0.960888	0.941	0.611	2.57625e-242
Mpeg1	1.7228e-244	0.670011	0.857	0.428	2.94358e-240
Oas3	2.84852e-244	0.570962	0.374	0.098	4.86698e-240
Arpc5	5.12337e-244	0.64909	0.947	0.646	8.75379e-240
Aprt	1.0118e-240	0.670703	0.799	0.39	1.72876e-236
Emp1	2.59314e-239	0.87292	0.553	0.206	4.43064e-235
Ifrd1	2.79266e-239	0.74659	0.785	0.402	4.77154e-235
Manf	4.77227e-239	0.795292	0.777	0.393	8.15389e-235
Rab1a	7.97978e-239	0.676024	0.733	0.359	1.36343e-234
Lamp1	5.57811e-237	0.561643	0.958	0.526	9.53075e-233
Il18	8.44352e-237	0.69309	0.388	0.111	1.44266e-232
Bax	1.68725e-236	0.717031	0.876	0.511	2.88283e-232
Cd300c2	2.97171e-235	0.757289	0.753	0.361	5.07747e-231
Zeb2os	1.06942e-234	0.620021	0.464	0.15	1.82721e-230
Ccr2	1.13731e-234	0.743127	0.74	0.334	1.9432e-230
Plaur	2.43515e-233	0.574954	0.699	0.29	4.1607e-229
Mx1	1.51753e-232	0.667685	0.36	0.095	2.59285e-228
Wfdc17	9.72927e-231	0.715848	0.879	0.439	1.66234e-226
Nr1h3	1.46e-230	0.659196	0.349	0.091	2.49455e-226
Eif4e	6.72795e-228	0.627874	0.691	0.317	1.14954e-223
Tpd52	2.15682e-226	0.64398	0.81	0.427	3.68514e-222
Xaf1	8.82274e-226	0.677448	0.543	0.208	1.50745e-221
Parp12	1.35611e-223	0.597124	0.402	0.123	2.31706e-219
Gm21188	4.87929e-223	0.565318	0.448	0.145	8.33676e-219
Anxa1	6.57192e-223	0.823528	0.784	0.402	1.12288e-218
Cyba	3.64583e-222	0.559532	0.99	0.755	6.22926e-218
Slc16a10	1.40408e-219	0.528183	0.365	0.101	2.39901e-215
Cd53	1.94513e-219	0.628157	0.945	0.623	3.32345e-215
Ccl4	1.32397e-218	1.11209	0.693	0.319	2.26213e-214
Sirpa	3.76454e-218	0.575162	0.705	0.312	6.4321e-214
Calr	1.3833e-216	0.707009	0.918	0.57	2.36351e-212
Mpp1	1.0388e-215	0.639017	0.595	0.243	1.77489e-211
Glrx	9.07403e-215	0.787193	0.572	0.244	1.55039e-210
Clec4a2	2.12126e-214	0.722287	0.631	0.267	3.62438e-210
Tor1aip1	5.83499e-214	0.674873	0.709	0.356	9.96966e-210
Jarid2	5.96237e-212	0.631346	0.481	0.171	1.01873e-207
Rbms1	4.96603e-211	0.609255	0.755	0.394	8.48496e-207
Slfn8	7.89222e-211	0.532621	0.367	0.103	1.34847e-206
Litaf	1.61174e-209	0.611075	0.774	0.401	2.75381e-205
Ifi27l2a	2.16424e-209	0.892576	0.85	0.554	3.69782e-205
Ifi203	4.92997e-209	0.742701	0.742	0.383	8.42335e-205
Efhd2	4.70765e-207	0.632021	0.879	0.505	8.04349e-203
Lpxn	5.65133e-206	0.593803	0.534	0.213	9.65586e-202
Daxx	5.72051e-206	0.615074	0.453	0.159	9.77406e-202
Fxyd5	2.59658e-205	0.55981	0.958	0.645	4.43651e-201
Gm5150	1.06725e-204	0.4694	0.304	0.074	1.8235e-200
Hspa8	9.23515e-204	0.80313	0.961	0.797	1.57792e-199
Fam129b	1.11239e-203	0.544009	0.384	0.117	1.90063e-199
Rap1b	1.62575e-203	0.578148	0.931	0.642	2.77775e-199
Atp6v1c1	2.18314e-203	0.671535	0.602	0.262	3.73012e-199
Grn	4.10785e-203	0.560018	0.887	0.471	7.01867e-199
Slc7a8	1.70882e-201	0.483645	0.281	0.067	2.91969e-197
B2m	1.06887e-200	0.475955	0.999	0.895	1.82627e-196
Phf11b	2.53598e-200	0.763518	0.627	0.289	4.33298e-196
Usp18	4.46466e-199	0.704601	0.459	0.164	7.62832e-195
Esd	1.55481e-198	0.715906	0.789	0.442	2.65655e-194
Gabarap	1.93459e-198	0.565968	0.967	0.665	3.30545e-194
Spi1	1.71363e-197	0.586669	0.891	0.514	2.9279e-193
Trim30d	1.79339e-197	0.555819	0.396	0.127	3.06419e-193
Basp1	1.46876e-195	0.696724	0.641	0.291	2.50953e-191
Igsf6	2.51932e-195	0.609576	0.495	0.189	4.30451e-191
Dnajb11	4.16767e-195	0.640876	0.644	0.311	7.12088e-191
Phf11d	1.32927e-193	0.669879	0.401	0.134	2.2712e-189
Actr3	3.09388e-193	0.587015	0.97	0.684	5.28621e-189
Nmi	4.33706e-193	0.580442	0.528	0.214	7.4103e-189
Myl12a	5.2137e-193	0.557696	0.947	0.649	8.90813e-189
B4galt5	1.34003e-192	0.478177	0.389	0.122	2.28957e-188
Ccr5	1.39839e-192	0.655986	0.5	0.195	2.38928e-188
Anxa4	3.39753e-192	0.600875	0.578	0.245	5.80502e-188
Ahnak	9.32811e-192	0.644316	0.841	0.49	1.5938e-187
Pparg	1.29212e-191	0.574562	0.356	0.106	2.20772e-187
Atp6v1e1	6.72307e-191	0.572947	0.696	0.352	1.1487e-186
Csf1r	1.10165e-190	0.378322	0.687	0.291	1.88229e-186
Lamp2	4.72827e-190	0.548466	0.759	0.387	8.07873e-186
Mdm2	2.20244e-189	0.623674	0.532	0.219	3.76309e-185
Ifih1	3.21821e-189	0.597763	0.378	0.119	5.49864e-185
Hsp90b1	3.59287e-189	0.63267	0.9	0.562	6.13878e-185
Cmpk1	1.44134e-188	0.582719	0.781	0.433	2.46267e-184
Ifit2	1.61349e-187	0.903347	0.292	0.076	2.7568e-183
Spp1	2.73232e-187	1.49211	0.488	0.186	4.66843e-183
Cdkn1a	6.93213e-187	0.60215	0.825	0.433	1.18442e-182
Irgm1	1.03061e-185	0.587313	0.459	0.171	1.7609e-181
Gch1	7.63775e-185	0.590874	0.54	0.225	1.30499e-180
Bst1	3.56314e-184	0.528328	0.315	0.089	6.08798e-180
Samhd1	1.27488e-183	0.613517	0.818	0.476	2.17826e-179
Ctsd	1.47086e-182	0.340653	0.776	0.372	2.51311e-178
Chmp2a	2.97954e-182	0.536189	0.816	0.467	5.09084e-178
Dok2	7.90997e-180	0.592945	0.532	0.216	1.3515e-175
Ifi206	1.02003e-179	0.542134	0.345	0.101	1.74282e-175
Il10rb	1.5328e-179	0.542519	0.669	0.324	2.61895e-175
Marcksl1	1.80242e-178	0.732586	0.688	0.347	3.07961e-174
Pgk1	3.02626e-178	0.607861	0.711	0.374	5.17067e-174
Atp2b1	4.7306e-178	0.580445	0.88	0.562	8.08271e-174
Osm	4.29849e-177	0.490943	0.311	0.086	7.34441e-173
Pdxk	3.38228e-175	0.58842	0.388	0.136	5.77896e-171
Rnf149	3.00561e-174	0.469976	0.622	0.289	5.13539e-170
Pla2g7	6.99962e-173	0.522052	0.55	0.217	1.19596e-168
Zfand5	1.7194e-172	0.618177	0.829	0.501	2.93776e-168
Oas1a	1.57202e-170	0.490476	0.324	0.099	2.68595e-166
Ccl12	2.0409e-170	1.17548	0.353	0.111	3.48707e-166
Ube2l3	2.98575e-170	0.547806	0.802	0.462	5.10146e-166
Nfe2l2	6.76892e-170	0.572653	0.661	0.331	1.15654e-165
Gla	1.31718e-168	0.511797	0.407	0.146	2.25054e-164
Ccrl2	1.58626e-168	0.7114	0.453	0.176	2.71028e-164
Stx3	1.64241e-167	0.50295	0.309	0.093	2.80622e-163
Itgb2	4.7615e-166	0.527249	0.77	0.433	8.13549e-162
Psmb10	8.06243e-166	0.572382	0.744	0.422	1.37755e-161
Tmbim6	9.32906e-166	0.541757	0.911	0.626	1.59396e-161
Trafd1	2.04664e-165	0.592286	0.523	0.232	3.49688e-161
Nfkbia	1.49962e-164	0.651481	0.925	0.648	2.56225e-160
Tspo	1.65065e-164	0.591564	0.922	0.633	2.8203e-160
Mdfic	1.68378e-162	0.505782	0.414	0.154	2.87691e-158
App	1.78919e-161	0.479505	0.653	0.323	3.05702e-157
Arf1	5.3309e-161	0.5209	0.878	0.553	9.10838e-157
Itgam	8.4335e-161	0.492475	0.515	0.216	1.44095e-156
Cflar	1.02188e-160	0.521947	0.545	0.242	1.74598e-156
Arpc2	2.86249e-160	0.480107	0.979	0.752	4.89085e-156
S100a11	7.55259e-160	0.434976	0.936	0.636	1.29044e-155
Nt5dc2	7.95062e-160	0.428163	0.242	0.061	1.35844e-155
Akr1a1	2.09452e-159	0.577422	0.913	0.569	3.5787e-155
Ell2	3.50984e-159	0.451012	0.301	0.089	5.99691e-155
Slc30a1	3.80943e-159	0.433321	0.247	0.062	6.50878e-155
Vps26a	4.56162e-159	0.544081	0.493	0.215	7.79399e-155
Atp6v1g1	5.05758e-159	0.490335	0.912	0.576	8.64139e-155
Fndc3a	1.08649e-158	0.546495	0.439	0.175	1.85637e-154
Adssl1	1.71589e-158	0.542371	0.446	0.179	2.93176e-154
Igtp	6.57994e-158	0.43152	0.327	0.101	1.12425e-153
Lyn	1.1779e-157	0.539274	0.657	0.346	2.01256e-153
Cdc42	1.38619e-157	0.476468	0.971	0.719	2.36844e-153
Psap	3.65991e-157	0.472605	0.972	0.625	6.25332e-153
Nampt	1.68569e-156	0.511041	0.505	0.222	2.88017e-152
Rab5c	2.40192e-156	0.521485	0.689	0.373	4.10393e-152
Nme1	4.57558e-156	0.490132	0.815	0.472	7.81783e-152
Fam49a	5.98704e-156	0.524874	0.417	0.157	1.02295e-151
Soat1	1.10895e-153	0.53005	0.464	0.194	1.89476e-149
Cmpk2	2.81693e-153	0.638714	0.251	0.066	4.81301e-149
Osbpl8	1.3226e-152	0.508883	0.505	0.218	2.2598e-148
Ogfr	3.77699e-152	0.495607	0.491	0.216	6.45336e-148
Srgn	1.1364e-151	0.48605	0.949	0.77	1.94165e-147
Rap1a	1.85361e-150	0.493156	0.863	0.548	3.16708e-146
Cycs	7.61755e-150	0.510709	0.698	0.375	1.30153e-145
Vapa	3.27103e-149	0.499329	0.738	0.428	5.58887e-145
Bach1	8.35736e-148	0.480423	0.415	0.162	1.42794e-143
Fgr	2.78234e-147	0.423649	0.376	0.134	4.75391e-143
Rac1	5.49596e-147	0.478218	0.917	0.609	9.39039e-143
Ggct	7.44827e-147	0.386319	0.268	0.074	1.27261e-142
Ddx58	5.11324e-146	0.424679	0.317	0.101	8.73648e-142
Mcub	5.89019e-146	0.5213	0.564	0.272	1.0064e-141
Tlr2	6.84509e-146	0.584814	0.419	0.167	1.16955e-141
Samd9l	7.27631e-146	0.544136	0.498	0.222	1.24323e-141
Pitpna	4.95664e-145	0.536548	0.778	0.457	8.46892e-141
Sem1	1.35749e-143	0.409469	0.981	0.729	2.3194e-139
Mmp19	1.66018e-143	0.527131	0.201	0.047	2.83659e-139
Arl5c	1.82063e-143	0.520273	0.446	0.177	3.11072e-139
Pdia3	2.36155e-143	0.503425	0.857	0.518	4.03495e-139
Clta	6.12293e-143	0.459631	0.96	0.681	1.04616e-138
Ctsa	3.48236e-142	0.461475	0.753	0.405	5.94997e-138
Pgam1	4.71606e-142	0.492536	0.707	0.38	8.05785e-138
Isg20	5.5363e-142	0.543295	0.403	0.153	9.45933e-138
Dhx58	6.08755e-142	0.455174	0.342	0.121	1.04012e-137
Slc3a2	1.08102e-141	0.514726	0.789	0.475	1.84703e-137
Iqgap1	1.61334e-139	0.450108	0.903	0.616	2.75656e-135
Hmox2	6.97241e-139	0.507691	0.574	0.293	1.19131e-134
Mndal	4.18555e-138	0.659438	0.737	0.44	7.15143e-134
Evi2a	6.75798e-138	0.49935	0.716	0.407	1.15467e-133
Tnf	1.0229e-137	0.514508	0.473	0.202	1.74772e-133
BC005537	7.53466e-137	0.445608	0.728	0.416	1.28737e-132
Calm1	1.24119e-136	0.373239	0.992	0.822	2.12069e-132
Hnrnph2	1.28825e-136	0.439737	0.514	0.24	2.2011e-132
Dck	1.49025e-136	0.44932	0.419	0.172	2.54624e-132
Rab7	4.02747e-136	0.450706	0.77	0.455	6.88133e-132
Il1b	6.41129e-136	0.613035	0.565	0.272	1.09543e-131
Cln8	2.18398e-135	0.464672	0.397	0.158	3.73155e-131
Ctsl	9.39664e-135	0.249158	0.614	0.278	1.60551e-130
Cdk6	9.44567e-135	0.442817	0.362	0.135	1.61389e-130
Gsr	9.12221e-134	0.402499	0.46	0.193	1.55862e-129
Psma4	9.50437e-134	0.468633	0.78	0.463	1.62392e-129
Tgm2	2.6168e-133	0.423235	0.323	0.11	4.47107e-129
Eif6	7.18473e-133	0.454715	0.635	0.342	1.22758e-128
Sdf2l1	3.10863e-132	0.491065	0.658	0.348	5.3114e-128
Reep3	4.62994e-132	0.518682	0.5	0.241	7.91072e-128
Sh3bgrl	2.68971e-131	0.49057	0.672	0.38	4.59563e-127
Snx2	2.76841e-131	0.458036	0.668	0.374	4.7301e-127
Cd93	3.35569e-131	0.437485	0.451	0.186	5.73353e-127
Rhoa	4.56021e-131	0.415723	0.928	0.672	7.79158e-127
Fas	6.4723e-131	0.417559	0.252	0.072	1.10586e-126
Ralb	1.12982e-130	0.474262	0.434	0.193	1.93041e-126
Slc6a6	1.67848e-130	0.465478	0.629	0.342	2.86785e-126
Lamtor3	1.06181e-129	0.477339	0.518	0.255	1.81422e-125
Pfn1	2.27038e-129	0.377986	0.991	0.842	3.87918e-125
Acp2	2.63502e-129	0.43273	0.318	0.112	4.50219e-125
Psmb2	4.7357e-129	0.446829	0.808	0.498	8.09141e-125
Lgals8	1.53236e-128	0.413058	0.312	0.108	2.61819e-124
Msn	1.84709e-128	0.441973	0.857	0.568	3.15594e-124
Psmd8	2.31724e-128	0.491806	0.755	0.453	3.95924e-124
Creld2	2.51955e-128	0.517714	0.402	0.166	4.3049e-124
Gng5	2.78765e-128	0.386639	0.967	0.699	4.76297e-124
Azin1	1.12503e-127	0.478161	0.482	0.226	1.92223e-123
Maf	2.71548e-127	0.34263	0.455	0.183	4.63967e-123
Alox5ap	1.20847e-126	0.390923	0.92	0.528	2.06479e-122
Stard3	1.65855e-126	0.461523	0.432	0.193	2.83381e-122
Hspa1a	2.67746e-126	0.764776	0.646	0.357	4.57472e-122
Slamf7	2.78399e-126	0.664287	0.548	0.292	4.75673e-122
Rin2	2.80359e-126	0.472429	0.314	0.111	4.79021e-122
Atp6v0d1	3.16083e-126	0.459745	0.635	0.352	5.40059e-122
Dynll1	1.40238e-125	0.464244	0.932	0.679	2.39611e-121
Ptpn1	1.7163e-125	0.476385	0.636	0.355	2.93247e-121
Selenow	1.85118e-125	0.459033	0.915	0.654	3.16293e-121
Hsd17b12	5.70602e-125	0.456719	0.49	0.235	9.74931e-121
Eno1	9.65834e-125	0.47193	0.622	0.334	1.65022e-120
Cd300lf	9.68015e-125	0.3893	0.234	0.067	1.65395e-120
Casp4	3.28135e-124	0.463929	0.405	0.168	5.60651e-120
Sppl2a	4.5903e-124	0.452509	0.466	0.217	7.84298e-120
Mcfd2	5.50597e-124	0.524629	0.377	0.155	9.4075e-120
Rbm47	6.68997e-124	0.428586	0.332	0.125	1.14305e-119
Ggh	8.7437e-124	0.455343	0.498	0.238	1.49395e-119
Mfsd1	2.1082e-123	0.444539	0.461	0.211	3.60206e-119
Vps29	6.39399e-123	0.415566	0.652	0.359	1.09248e-118
Ube2n	6.73306e-123	0.420041	0.674	0.386	1.15041e-118
Rap2b	1.1178e-122	0.414819	0.464	0.209	1.90988e-118
Pcbp1	1.63439e-122	0.460653	0.77	0.482	2.79253e-118
Tmem38b	5.56524e-122	0.346545	0.257	0.079	9.50877e-118
Plk2	6.21113e-122	0.593144	0.475	0.218	1.06123e-117
Atp6v0b	8.66063e-122	0.421797	0.877	0.558	1.47975e-117
Lat2	1.64048e-121	0.528415	0.644	0.357	2.80293e-117
Ass1	1.90699e-121	0.583308	0.453	0.209	3.25828e-117
Serpinb8	4.93568e-120	0.413509	0.261	0.083	8.43311e-116
Ap3s1	2.64098e-119	0.452312	0.578	0.305	4.51238e-115
Rasgef1b	3.56315e-119	0.413182	0.441	0.193	6.088e-115
Tnfrsf1b	5.88926e-119	0.469504	0.439	0.199	1.00624e-114
Csf2ra	9.83641e-119	0.451843	0.521	0.265	1.68065e-114
2022-03-05	1.77279e-118	0.545942	0.48	0.24	3.02899e-114
Neat1	2.27967e-118	0.431121	0.856	0.539	3.89505e-114
Eif2ak2	3.59182e-118	0.454612	0.356	0.145	6.13699e-114
Ywhae	7.258e-118	0.414649	0.829	0.515	1.2401e-113
Sema4d	1.20513e-117	0.418123	0.453	0.208	2.05909e-113
Rnpep	1.15934e-116	0.445247	0.47	0.227	1.98084e-112
Cyfip1	1.80122e-116	0.429068	0.502	0.25	3.07756e-112
Ascc3	5.10169e-116	0.439639	0.406	0.177	8.71674e-112
Ccl3	7.9586e-116	0.375322	0.567	0.287	1.35981e-111
Adap2	1.03357e-115	0.378513	0.298	0.106	1.76595e-111
Camk2d	1.11298e-115	0.331109	0.48	0.218	1.90164e-111
Psme2	1.65304e-115	0.399635	0.791	0.49	2.82439e-111
Pirb	2.07369e-115	0.457369	0.56	0.298	3.54311e-111
Ftl1-ps1	4.61582e-115	0.428272	0.565	0.29	7.88659e-111
Irf5	1.21399e-114	0.430301	0.656	0.366	2.07423e-110
Casp1	3.53675e-114	0.496874	0.391	0.172	6.04289e-110
Nlrp3	8.70055e-114	0.326431	0.331	0.124	1.48658e-109
Rilpl2	9.99635e-114	0.499789	0.657	0.381	1.70798e-109
Mrpl52	1.32505e-112	0.429707	0.745	0.459	2.26397e-108
Cd40	1.80826e-112	0.41856	0.315	0.116	3.0896e-108
Diaph1	5.082e-112	0.395026	0.565	0.299	8.68311e-108
Mbnl2	1.3342e-111	0.428264	0.477	0.233	2.27962e-107
Skap2	1.40926e-111	0.394241	0.661	0.372	2.40785e-107
Brk1	3.92167e-111	0.396534	0.831	0.536	6.70057e-107
Epsti1	5.36172e-111	0.328272	0.691	0.4	9.16103e-107
Adam17	2.19036e-110	0.368109	0.345	0.138	3.74245e-106
Calm2	2.35927e-110	0.460416	0.91	0.655	4.03105e-106
Nrros	2.42481e-110	0.431479	0.637	0.36	4.14303e-106
Morf4l2	6.40251e-110	0.414622	0.554	0.297	1.09393e-105
1110008F13Rik	7.81324e-110	0.412659	0.73	0.441	1.33497e-105
Slc31a2	1.77219e-109	0.420217	0.3	0.114	3.02796e-105
Ncf4	2.32648e-109	0.430226	0.551	0.293	3.97502e-105
Prkcd	3.81098e-109	0.41391	0.653	0.378	6.51144e-105
Rufy3	5.71028e-109	0.389005	0.267	0.093	9.75658e-105
Tnfrsf12a	7.02238e-109	0.400075	0.27	0.093	1.19984e-104
Fnip2	1.9762e-108	0.371281	0.222	0.068	3.37653e-104
Tnip3	2.77181e-108	0.519367	0.379	0.158	4.73592e-104
Tnfrsf11a	3.80352e-108	0.351418	0.236	0.075	6.49869e-104
Cd84	3.988e-108	0.348354	0.529	0.255	6.8139e-104
P2rx4	7.62463e-108	0.411448	0.555	0.293	1.30274e-103
Mxd1	9.01003e-108	0.358535	0.316	0.117	1.53945e-103
Cd86	1.14889e-107	0.435438	0.491	0.242	1.963e-103
Sdc3	1.42127e-107	0.440315	0.491	0.251	2.42838e-103
Rapgef2	2.71624e-107	0.348033	0.224	0.068	4.64098e-103
Adam8	5.12182e-107	0.433009	0.442	0.207	8.75115e-103
Rhob	1.79113e-106	0.436247	0.489	0.236	3.06033e-102
Atp6v1a	1.84037e-106	0.44722	0.517	0.261	3.14446e-102
Cers6	1.89463e-106	0.362951	0.286	0.104	3.23716e-102
Ralgds	1.84755e-105	0.333308	0.213	0.064	3.15673e-101
Sh3glb1	3.12036e-105	0.384382	0.835	0.553	5.33146e-101
Cap1	4.22581e-105	0.413393	0.455	0.225	7.22021e-101
Jpt1	2.60085e-104	0.39306	0.876	0.591	4.44382e-100
Stat1	3.32605e-104	0.390796	0.556	0.293	5.68289e-100
Actr2	3.62583e-104	0.366592	0.754	0.476	6.19509e-100
Hsp90aa1	1.22896e-103	0.447156	0.94	0.713	2.0998e-99
Agpat4	2.13975e-103	0.402126	0.437	0.207	3.65598e-99
Cct8	4.13093e-103	0.408978	0.631	0.369	7.05811e-99
Plekho2	4.3083e-103	0.415361	0.525	0.281	7.36117e-99
Ifngr2	1.42803e-102	0.436504	0.52	0.279	2.43994e-98
Plekhf2	1.67767e-102	0.424922	0.409	0.194	2.86647e-98
Slc16a3	4.64235e-102	0.29702	0.253	0.085	7.93192e-98
P4ha1	8.58645e-102	0.362327	0.32	0.128	1.46708e-97
Amdhd2	1.34969e-101	0.442899	0.383	0.176	2.30609e-97
Carhsp1	2.46322e-101	0.441849	0.342	0.145	4.20866e-97
Lgals1	4.4383e-101	0.421089	0.852	0.554	7.58328e-97
Cept1	1.00317e-100	0.357316	0.327	0.133	1.71402e-96
Pomp	1.41868e-100	0.369493	0.888	0.591	2.42396e-96
Ostf1	3.22482e-100	0.32984	0.888	0.594	5.50994e-96
Atp1a1	5.52455e-100	0.421788	0.622	0.367	9.43925e-96
Atp6ap2	6.09973e-100	0.388998	0.586	0.329	1.0422e-95
Acer3	2.40974e-99	0.396214	0.421	0.203	4.11728e-95
Slc7a11	2.87638e-99	0.228331	0.246	0.08	4.91459e-95
Abracl	1.52231e-98	0.399821	0.847	0.569	2.60102e-94
Atg3	1.91087e-98	0.362623	0.601	0.348	3.26491e-94
Rrbp1	2.46612e-98	0.365608	0.803	0.521	4.21362e-94
Irak2	2.48772e-98	0.345821	0.308	0.121	4.25051e-94
Ube2a	5.84411e-98	0.371274	0.595	0.341	9.98524e-94
Cnih4	6.08097e-98	0.40513	0.587	0.338	1.039e-93
Capn2	8.1234e-98	0.431042	0.452	0.231	1.38796e-93
Gnb2	4.76285e-97	0.359868	0.904	0.608	8.13781e-93
Dusp3	1.32205e-96	0.405431	0.434	0.214	2.25886e-92
Hif1a	1.83513e-96	0.386933	0.36	0.159	3.1355e-92
Tgif1	2.52961e-96	0.317079	0.553	0.29	4.32209e-92
Gas2l3	2.81371e-96	0.339746	0.22	0.072	4.8075e-92
Mrpl54	4.37829e-96	0.394993	0.609	0.359	7.48075e-92
Gm34084	1.71802e-95	0.369635	0.388	0.173	2.93542e-91
Map2k3	1.83989e-95	0.433852	0.418	0.208	3.14364e-91
Cdk14	3.24989e-95	0.398171	0.289	0.115	5.55276e-91
Atp6v0e	4.01909e-95	0.36833	0.924	0.625	6.86701e-91
Ptpn6	9.72867e-95	0.382084	0.703	0.437	1.66224e-90
Ncf2	2.72103e-94	0.327748	0.617	0.353	4.64915e-90
Fabp5	2.73725e-94	0.701439	0.478	0.239	4.67686e-90
Kras	3.93801e-94	0.350988	0.538	0.295	6.72848e-90
Tubb6	4.61923e-94	0.417108	0.493	0.26	7.89242e-90
Marcks	7.15145e-94	0.331664	0.751	0.455	1.2219e-89
St13	1.00857e-93	0.361529	0.543	0.302	1.72324e-89
Txnrd1	2.4835e-93	0.480022	0.376	0.176	4.24331e-89
Hcls1	8.03666e-93	0.343205	0.714	0.434	1.37314e-88
Vamp8	8.04856e-93	0.350996	0.861	0.575	1.37518e-88
Mapk6	1.57273e-92	0.322303	0.265	0.099	2.68717e-88
Tpm4	3.11351e-92	0.395278	0.727	0.457	5.31974e-88
Adprh	3.71769e-92	0.361386	0.431	0.218	6.35204e-88
Pilra	4.76423e-92	0.330156	0.305	0.12	8.14016e-88
Gadd45b	5.48873e-92	0.336282	0.733	0.441	9.37805e-88
Tpst2	8.05928e-92	0.358536	0.448	0.225	1.37701e-87
Dbi	2.14301e-91	0.296927	0.825	0.531	3.66155e-87
Tmem120a	2.4111e-91	0.384324	0.279	0.11	4.1196e-87
Tnfrsf1a	3.18972e-91	0.360825	0.496	0.27	5.44996e-87
Spg21	1.21813e-90	0.384755	0.584	0.34	2.08129e-86
Ywhab	2.24367e-90	0.349499	0.678	0.42	3.83353e-86
Lrp1	5.75008e-90	0.314663	0.438	0.21	9.82459e-86
Cd52	8.92384e-90	0.338377	0.98	0.797	1.52473e-85
Znfx1	9.5005e-90	0.357374	0.279	0.11	1.62326e-85
Eif1a	1.41369e-89	0.412172	0.464	0.249	2.41542e-85
Sntb2	4.70545e-89	0.309312	0.216	0.072	8.03974e-85
Lilrb4a	5.10895e-89	0.327037	0.261	0.098	8.72916e-85
Ube2d3	9.38486e-89	0.33787	0.926	0.69	1.6035e-84
Ecm1	1.19534e-88	0.356482	0.265	0.1	2.04235e-84
Cd48	1.69308e-88	0.441715	0.729	0.472	2.8928e-84
Fam26f	1.84922e-88	0.539243	0.253	0.095	3.15958e-84
Psmb5	2.73644e-88	0.333744	0.742	0.467	4.67548e-84
Klf6	3.03366e-88	0.335214	0.924	0.671	5.18332e-84
Cers2	4.20329e-88	0.327743	0.486	0.259	7.18173e-84
Lamtor5	4.22824e-88	0.3298	0.716	0.441	7.22438e-84
Nfil3	1.36424e-87	0.347743	0.304	0.125	2.33094e-83
Lpl	1.53336e-87	0.358987	0.532	0.269	2.61991e-83
Slc25a5	2.18123e-87	0.371275	0.929	0.673	3.72685e-83
Fcgr4	1.12163e-86	0.492618	0.37	0.17	1.91643e-82
Nadk	1.15234e-86	0.382178	0.486	0.269	1.96889e-82
Selenos	1.51338e-86	0.354209	0.589	0.344	2.58575e-82
Lman2	1.57245e-86	0.343225	0.622	0.375	2.68668e-82
Ptp4a1	5.43084e-86	0.33441	0.498	0.271	9.27914e-82
Psma2	5.87454e-86	0.327237	0.822	0.545	1.00372e-81
Taldo1	5.87726e-86	0.266566	0.845	0.54	1.00419e-81
Hnrnpf	7.14187e-86	0.338169	0.903	0.652	1.22026e-81
Tapbp	9.00761e-86	0.366651	0.674	0.422	1.53904e-81
Vmp1	1.25816e-85	0.333817	0.441	0.229	2.14969e-81
Asph	1.58577e-85	0.346518	0.337	0.149	2.70944e-81
Mafg	1.83699e-85	0.349483	0.378	0.18	3.13868e-81
Eif5	1.92927e-85	0.327275	0.851	0.609	3.29636e-81
Cope	2.72157e-85	0.336246	0.649	0.396	4.65007e-81
Gdf15	3.29677e-85	0.559233	0.297	0.122	5.63285e-81
Actg1	3.46649e-85	0.351522	0.971	0.802	5.92284e-81
Sqstm1	4.36328e-85	0.458161	0.615	0.379	7.45511e-81
Cklf	4.53833e-85	0.326234	0.45	0.233	7.75418e-81
Arl1	5.85553e-85	0.367801	0.474	0.26	1.00048e-80
Fcgr3	1.02831e-84	0.223129	0.606	0.308	1.75698e-80
Nfkbib	1.18001e-84	0.379754	0.439	0.232	2.01617e-80
Tmem251	2.94825e-84	0.380832	0.383	0.186	5.03738e-80
Stx7	3.06333e-84	0.368885	0.596	0.358	5.234e-80
Dusp1	7.64444e-84	0.409925	0.85	0.58	1.30613e-79
Psma7	7.80347e-84	0.324961	0.881	0.584	1.3333e-79
Psma3	1.40349e-83	0.327358	0.863	0.591	2.39799e-79
Plod3	1.92859e-83	0.321865	0.254	0.098	3.2952e-79
Rtn4	2.34276e-83	0.336219	0.763	0.491	4.00285e-79
Etf1	2.51143e-83	0.339214	0.483	0.267	4.29102e-79
Slc7a7	2.63021e-83	0.316661	0.22	0.079	4.49397e-79
Laptm4a	4.08751e-82	0.285408	0.701	0.442	6.98393e-78
Itgav	4.3692e-82	0.275895	0.252	0.096	7.46521e-78
Tmed2	1.09077e-81	0.337207	0.781	0.519	1.86369e-77
Sp100	2.45217e-81	0.338859	0.646	0.401	4.18978e-77
Fam105a	2.78556e-81	0.400727	0.59	0.357	4.7594e-77
Glipr1	4.32921e-81	0.429603	0.571	0.342	7.39689e-77
Tns3	5.61648e-81	0.388079	0.291	0.127	9.59632e-77
Psmb7	1.10411e-80	0.312926	0.675	0.417	1.88648e-76
Blvra	1.95247e-80	0.359368	0.448	0.24	3.336e-76
Fem1c	2.57169e-80	0.344107	0.321	0.144	4.39399e-76
Herc6	7.08719e-80	0.347217	0.238	0.091	1.21092e-75
Gpr141	8.96032e-80	0.342421	0.245	0.094	1.53096e-75
Tppp3	1.4888e-79	0.367687	0.281	0.115	2.54376e-75
Snx3	1.69405e-79	0.325717	0.796	0.519	2.89445e-75
Ybx1	1.745e-79	0.309602	0.956	0.695	2.9815e-75
Alas1	2.72157e-79	0.349449	0.256	0.103	4.65008e-75
Tbcb	2.757e-79	0.338665	0.622	0.38	4.71062e-75
Lcp2	3.64148e-79	0.322069	0.385	0.188	6.22183e-75
Lgals3bp	3.82173e-79	0.325757	0.533	0.297	6.5298e-75
Gngt2	5.38942e-79	0.421808	0.606	0.354	9.20836e-75
Fam49b	9.17496e-79	0.353999	0.799	0.546	1.56763e-74
Slc35b1	1.21165e-78	0.346633	0.388	0.195	2.07022e-74
Tank	1.22365e-78	0.333924	0.369	0.18	2.09072e-74
Psma6	1.35082e-78	0.336828	0.647	0.407	2.30801e-74
Casp8	1.94862e-78	0.348723	0.408	0.213	3.32941e-74
Max	2.14056e-78	0.326703	0.426	0.223	3.65736e-74
St6galnac4	2.83315e-78	0.337517	0.261	0.107	4.84073e-74
Arpc3	2.9489e-78	0.289742	0.961	0.716	5.03849e-74
Cfl1	3.72024e-78	0.292127	0.98	0.804	6.3564e-74
Mvp	4.39434e-78	0.321778	0.439	0.236	7.50817e-74
Hip1	7.0833e-78	0.315491	0.295	0.128	1.21025e-73
Xbp1	7.74972e-78	0.353925	0.491	0.279	1.32412e-73
D17Wsu92e	1.07357e-77	0.303537	0.324	0.148	1.8343e-73
Ier5	1.45593e-77	0.287037	0.874	0.612	2.4876e-73
Psmb6	1.57593e-77	0.336391	0.809	0.524	2.69263e-73
Myd88	1.6365e-77	0.339009	0.377	0.19	2.79612e-73
Srgap2	1.93758e-77	0.29956	0.267	0.11	3.31055e-73
Lims1	3.16513e-77	0.340698	0.482	0.273	5.40795e-73
Canx	4.00709e-77	0.343508	0.675	0.428	6.84651e-73
Camkk2	1.11756e-76	0.303061	0.297	0.128	1.90946e-72
Sgpl1	1.13214e-76	0.325312	0.385	0.195	1.93438e-72
Tmed10	3.81484e-76	0.302316	0.788	0.507	6.51803e-72
Snf8	5.47632e-76	0.327351	0.533	0.316	9.35684e-72
1600014C10Rik	1.0438e-75	0.320811	0.213	0.077	1.78343e-71
Npc1	4.85729e-75	0.316201	0.277	0.117	8.29917e-71
Ly96	6.43816e-75	0.308149	0.317	0.145	1.10002e-70
Ranbp1	1.01025e-74	0.285947	0.709	0.441	1.72611e-70
Ywhag	1.17444e-74	0.336514	0.423	0.23	2.00664e-70
Rab11a	1.19707e-74	0.278597	0.615	0.376	2.04532e-70
Rnf34	3.3544e-74	0.319934	0.261	0.109	5.73133e-70
Nptn	6.20392e-74	0.336455	0.565	0.346	1.06e-69
Stom	7.77579e-74	0.352795	0.297	0.136	1.32857e-69
Atox1	8.99432e-74	0.243869	0.936	0.631	1.53677e-69
Vav1	9.89218e-74	0.35475	0.394	0.208	1.69018e-69
Stat2	1.0817e-73	0.345685	0.308	0.141	1.84819e-69
Srsf2	1.38735e-73	0.311443	0.814	0.571	2.37043e-69
Ndufb6	2.47177e-73	0.292379	0.629	0.392	4.22326e-69
2810474O19Rik	4.70971e-73	0.332102	0.48	0.272	8.04702e-69
Tpi1	9.29433e-73	0.371373	0.582	0.357	1.58803e-68
Mydgf	1.10169e-72	0.318499	0.51	0.298	1.88235e-68
Ldha	1.41097e-72	0.31599	0.852	0.554	2.41078e-68
Atp6v1d	1.58911e-72	0.335566	0.537	0.326	2.71516e-68
Morc3	5.55508e-72	0.319554	0.381	0.196	9.49142e-68
Gbp2	7.12063e-72	0.437996	0.223	0.085	1.21663e-67
Ube2f	9.97073e-72	0.35061	0.454	0.26	1.7036e-67
Il13ra1	1.24882e-71	0.307356	0.228	0.089	2.13374e-67
Fkbp2	1.32196e-71	0.296366	0.608	0.363	2.2587e-67
Hnrnpa2b1	2.04585e-71	0.311834	0.903	0.671	3.49553e-67
Gsdmd	2.40994e-71	0.31403	0.367	0.189	4.11762e-67
Lmna	5.91839e-71	0.434794	0.476	0.268	1.01122e-66
2010111I01Rik	1.29043e-70	0.297152	0.29	0.128	2.20483e-66
Tmem167	1.37502e-70	0.320821	0.603	0.383	2.34936e-66
Cacybp	4.59387e-70	0.311732	0.531	0.317	7.84908e-66
Cln5	5.37733e-70	0.322391	0.256	0.11	9.1877e-66
Sra1	6.08063e-70	0.310605	0.504	0.299	1.03894e-65
Hnrnpa3	1.47808e-69	0.292645	0.82	0.561	2.52545e-65
D1Ertd622e	1.63107e-69	0.319741	0.411	0.222	2.78685e-65
Naa20	2.18275e-69	0.319069	0.417	0.227	3.72945e-65
Actb	3.64211e-69	0.479409	0.905	0.688	6.22291e-65
Arf5	4.81259e-69	0.297916	0.859	0.607	8.22278e-65
Capzb	5.0113e-69	0.295796	0.914	0.638	8.5623e-65
Hnrnpk	6.86914e-69	0.281553	0.846	0.611	1.17366e-64
Tnfaip2	6.87733e-69	0.268269	0.297	0.134	1.17506e-64
Dnaja1	7.96724e-69	0.28353	0.85	0.595	1.36128e-64
Ccdc86	1.24518e-68	0.327767	0.306	0.146	2.12751e-64
Vps35	1.28664e-68	0.338077	0.475	0.28	2.19836e-64
Evl	1.37689e-68	0.315642	0.545	0.33	2.35255e-64
Trim25	1.8997e-68	0.336748	0.4	0.216	3.24583e-64
Cmtm3	4.41642e-68	0.343768	0.404	0.222	7.54589e-64
Prkx	4.56928e-68	0.333656	0.325	0.159	7.80708e-64
Zfp36	7.9537e-68	0.250134	0.798	0.534	1.35897e-63
Tcirg1	9.36644e-68	0.3064	0.369	0.191	1.60035e-63
Gpx1	1.40976e-67	0.313249	0.918	0.666	2.40871e-63
Napa	2.14437e-67	0.297965	0.459	0.267	3.66387e-63
Rbx1	3.3478e-67	0.282796	0.848	0.589	5.72006e-63
Ubc	4.72372e-67	0.321808	0.948	0.767	8.07094e-63
Tmem86a	4.95312e-67	0.317484	0.279	0.125	8.4629e-63
Hk3	4.95468e-67	0.293386	0.22	0.088	8.46557e-63
Tomm20	5.40273e-67	0.31958	0.781	0.545	9.2311e-63
Magohb	5.64432e-67	0.327375	0.278	0.126	9.64389e-63
Ndufs4	7.50726e-67	0.275457	0.581	0.363	1.28269e-62
Snx10	7.98549e-67	0.335788	0.4	0.221	1.3644e-62
1700017B05Rik	8.05417e-67	0.252599	0.206	0.078	1.37614e-62
Lrrc59	1.11732e-66	0.306952	0.365	0.192	1.90906e-62
Hpcal1	2.09118e-66	0.301219	0.542	0.332	3.573e-62
Cln3	2.51526e-66	0.280701	0.281	0.128	4.29758e-62
Dnaja2	4.22112e-66	0.291029	0.533	0.326	7.2122e-62
Rps27l	5.80533e-66	0.229141	0.879	0.574	9.91898e-62
Spcs2	6.38802e-66	0.309306	0.709	0.469	1.09146e-61
Dennd1a	9.63205e-66	0.277948	0.211	0.082	1.64573e-61
Slc43a2	1.44203e-65	0.317679	0.292	0.136	2.46385e-61
Derl1	1.45977e-65	0.302412	0.484	0.29	2.49416e-61
Daglb	1.57203e-65	0.310912	0.311	0.15	2.68597e-61
Fkbp1a	1.89078e-65	0.281153	0.655	0.42	3.23058e-61
Tmed9	2.50683e-65	0.278352	0.748	0.505	4.28316e-61
Slc31a1	3.37374e-65	0.299758	0.255	0.113	5.76437e-61
Snap23	5.71541e-65	0.291474	0.433	0.248	9.76535e-61
Mrps18c	1.15815e-64	0.291345	0.522	0.323	1.97881e-60
Psmc1	1.19832e-64	0.304627	0.378	0.205	2.04745e-60
Atp1b3	1.2051e-64	0.274183	0.592	0.378	2.05904e-60
Clec12a	1.53688e-64	0.331052	0.57	0.355	2.62592e-60
Gas7	1.92377e-64	0.320877	0.266	0.119	3.28695e-60
Psmb4	5.72662e-64	0.267775	0.678	0.447	9.78449e-60
Txndc17	6.49949e-64	0.23385	0.731	0.471	1.1105e-59
Myo1f	7.64012e-64	0.289405	0.473	0.278	1.30539e-59
Atp6v1f	1.2213e-63	0.286478	0.853	0.607	2.08672e-59
Usp25	1.22992e-63	0.295241	0.386	0.208	2.10144e-59
Uap1l1	1.3223e-63	0.378296	0.398	0.219	2.25928e-59
Ssr3	1.99772e-63	0.289245	0.527	0.325	3.4133e-59
Ran	2.66408e-63	0.215319	0.832	0.547	4.55185e-59
Tmem14c	2.82256e-63	0.293391	0.676	0.439	4.82263e-59
Atp6ap1	4.45048e-63	0.289339	0.542	0.335	7.60409e-59
Rap2c	4.72691e-63	0.24681	0.239	0.101	8.0764e-59
Ssr2	6.53476e-63	0.315913	0.531	0.327	1.11653e-58
Anxa7	8.73028e-63	0.331451	0.474	0.286	1.49166e-58
Ppp4c	1.1708e-62	0.27296	0.611	0.395	2.00043e-58
Axl	1.89993e-62	0.36942	0.332	0.167	3.24621e-58
Map2k1	2.75183e-62	0.278349	0.413	0.231	4.70178e-58
Snrpb	3.3157e-62	0.274253	0.832	0.586	5.6652e-58
Trib1	4.35454e-62	0.278922	0.407	0.225	7.44016e-58
Ldlr	5.25108e-62	0.293713	0.285	0.131	8.972e-58
Tagln2	5.3692e-62	0.300983	0.85	0.59	9.17381e-58
Psmc5	6.56823e-62	0.286538	0.473	0.286	1.12225e-57
Tmem51	8.07876e-62	0.354195	0.354	0.191	1.38034e-57
Tkt	1.01806e-61	0.265339	0.648	0.422	1.73945e-57
Stk40	1.01974e-61	0.23173	0.21	0.083	1.74232e-57
Pttg1	1.03282e-61	0.301687	0.437	0.255	1.76468e-57
Sp140	1.65652e-61	0.36886	0.404	0.228	2.83033e-57
Srsf7	2.78109e-61	0.254586	0.594	0.374	4.75178e-57
Lipa	2.9895e-61	0.346805	0.502	0.296	5.10786e-57
Cd47	3.16096e-61	0.271833	0.877	0.63	5.40082e-57
H2-D1	1.85236e-60	0.240088	0.991	0.877	3.16494e-56
Aldoa	1.89752e-60	0.257647	0.782	0.52	3.2421e-56
Renbp	1.9107e-60	0.338759	0.31	0.156	3.26462e-56
Clic4	2.49417e-60	0.286413	0.465	0.275	4.26153e-56
2022-09-07	2.5301e-60	0.272818	0.696	0.466	4.32293e-56
Edem1	2.55303e-60	0.306133	0.387	0.216	4.36211e-56
Capns1	2.78814e-60	0.253741	0.735	0.493	4.76382e-56
Surf4	3.10602e-60	0.300136	0.426	0.247	5.30694e-56
Gng12	3.16652e-60	0.276778	0.395	0.218	5.41031e-56
Capza1	5.26347e-60	0.276699	0.52	0.325	8.99317e-56
Rnf115	5.32433e-60	0.271462	0.396	0.221	9.09715e-56
Lasp1	5.35908e-60	0.302753	0.38	0.21	9.15652e-56
Gusb	7.177e-60	0.295227	0.553	0.336	1.22626e-55
Sf3b6	8.31697e-60	0.250784	0.692	0.469	1.42104e-55
Alcam	9.23267e-60	0.355646	0.367	0.205	1.57749e-55
Eif2s1	1.24582e-59	0.295197	0.473	0.287	2.1286e-55
Bcl2l11	1.36766e-59	0.264138	0.277	0.128	2.33678e-55
M6pr	1.79178e-59	0.313512	0.622	0.408	3.06144e-55
Bag1	2.05402e-59	0.292115	0.597	0.391	3.50949e-55
Dtnbp1	2.59696e-59	0.341733	0.38	0.213	4.43717e-55
Pacsin2	4.7701e-59	0.288202	0.295	0.147	8.15018e-55
Qpct	1.06963e-58	0.320446	0.228	0.099	1.82757e-54
Prdx6	1.40265e-58	0.306176	0.544	0.345	2.39656e-54
Ssu72	1.94633e-58	0.260323	0.626	0.411	3.3255e-54
Gapdh	2.22137e-58	0.261892	0.755	0.505	3.79543e-54
Rbm8a	2.75821e-58	0.252499	0.614	0.407	4.71267e-54
Cox5a	2.95614e-58	0.253693	0.882	0.608	5.05085e-54
Prelid1	4.03315e-58	0.258001	0.693	0.458	6.89103e-54
Psmd6	4.45396e-58	0.260623	0.44	0.26	7.61004e-54
Tln1	5.30438e-58	0.286422	0.699	0.485	9.06306e-54
Eps8	6.8108e-58	0.395889	0.349	0.191	1.16369e-53
Lrrfip2	8.44497e-58	0.3116	0.334	0.179	1.44291e-53
Ube2i	8.51478e-58	0.24972	0.656	0.436	1.45484e-53
Ostc	9.59072e-58	0.277097	0.586	0.38	1.63867e-53
Fcgr2b	1.18737e-57	0.311169	0.513	0.312	2.02874e-53
Naa50	1.53316e-57	0.301317	0.461	0.278	2.61956e-53
Edf1	1.87391e-57	0.242385	0.801	0.55	3.20176e-53
Ehd4	2.6944e-57	0.254027	0.567	0.354	4.60366e-53
Plec	2.95013e-57	0.284884	0.306	0.154	5.04058e-53
Eif1ax	5.56893e-57	0.276543	0.453	0.273	9.51507e-53
Rbpj	5.85105e-57	0.328586	0.443	0.267	9.9971e-53
U2af1	1.09184e-56	0.255654	0.598	0.39	1.86552e-52
Txndc9	1.11746e-56	0.255532	0.443	0.265	1.9093e-52
Mien1	1.51205e-56	0.271976	0.579	0.378	2.58349e-52
Arid5b	1.95809e-56	0.229346	0.301	0.146	3.3456e-52
Rhog	2.38288e-56	0.282327	0.491	0.307	4.0714e-52
Eif5a	2.86719e-56	0.247457	0.888	0.633	4.89888e-52
Ak6	5.23329e-56	0.305694	0.302	0.157	8.9416e-52
Dtx3l	7.34829e-56	0.258322	0.256	0.119	1.25553e-51
Kdelr2	1.07602e-55	0.285204	0.35	0.192	1.83849e-51
Slc25a3	1.41225e-55	0.254547	0.893	0.644	2.41297e-51
Abr	1.6817e-55	0.23857	0.231	0.103	2.87335e-51
Srsf3	2.14836e-55	0.242141	0.755	0.518	3.67069e-51
Psma5	2.65096e-55	0.285695	0.627	0.419	4.52943e-51
Commd4	3.47388e-55	0.288759	0.489	0.309	5.93547e-51
Cotl1	4.27865e-55	0.23482	0.879	0.606	7.3105e-51
Rab32	4.8138e-55	0.311578	0.308	0.161	8.22486e-51
Mrpl20	5.08399e-55	0.258011	0.561	0.363	8.6865e-51
Epb41l2	5.48342e-55	0.263712	0.308	0.159	9.36898e-51
Sec13	7.44244e-55	0.309753	0.369	0.212	1.27162e-50
Clip1	8.62133e-55	0.264769	0.303	0.154	1.47304e-50
Erp44	2.03682e-54	0.272503	0.457	0.278	3.48012e-50
Pycard	2.29714e-54	0.271276	0.69	0.467	3.92489e-50
Xdh	2.38296e-54	0.240265	0.24	0.109	4.07153e-50
Trappc2l	4.97817e-54	0.253475	0.525	0.332	8.5057e-50
Fam50a	5.47097e-54	0.258422	0.351	0.194	9.34771e-50
Vwa5a	6.34412e-54	0.277182	0.288	0.145	1.08396e-49
Psme1	6.64282e-54	0.201072	0.815	0.552	1.13499e-49
Cd300lb	7.77904e-54	0.253844	0.227	0.101	1.32913e-49
Pgd	1.29567e-53	0.270089	0.394	0.225	2.21378e-49
Snrpd3	1.3594e-53	0.242837	0.573	0.375	2.32267e-49
Ppig	1.41608e-53	0.243272	0.558	0.362	2.41952e-49
Tgfb1	1.48737e-53	0.243473	0.643	0.432	2.54133e-49
Flcn	1.96252e-53	0.213441	0.211	0.09	3.35317e-49
H2afj	3.8456e-53	0.217208	0.69	0.479	6.57059e-49
Fnip1	4.72227e-53	0.222948	0.286	0.142	8.06847e-49
Ap2m1	1.04293e-52	0.21305	0.611	0.393	1.78195e-48
Ly86	1.09703e-52	0.232494	0.731	0.486	1.87438e-48
Ubxn4	1.52886e-52	0.261311	0.555	0.365	2.6122e-48
Rala	1.9459e-52	0.287567	0.577	0.378	3.32477e-48
Gna13	2.06657e-52	0.239642	0.471	0.291	3.53094e-48
Tmem219	2.49932e-52	0.284093	0.457	0.282	4.27034e-48
Sar1a	3.26116e-52	0.263563	0.454	0.278	5.57202e-48
Mitd1	3.43173e-52	0.233886	0.207	0.089	5.86346e-48
Tpm3	3.44147e-52	0.240935	0.755	0.535	5.88009e-48
Cisd2	3.66656e-52	0.235275	0.473	0.296	6.26469e-48
Cd300ld	8.69786e-52	0.238831	0.331	0.175	1.48612e-47
2610001J05Rik	9.96058e-52	0.266885	0.505	0.32	1.70187e-47
Sin3b	1.24258e-51	0.2097	0.582	0.384	2.12308e-47
Hsbp1	1.33321e-51	0.231581	0.591	0.391	2.27793e-47
Bcl2l1	1.82542e-51	0.250329	0.234	0.108	3.11891e-47
Milr1	2.56994e-51	0.287328	0.325	0.176	4.391e-47
Eea1	2.7113e-51	0.271705	0.306	0.162	4.63252e-47
Lair1	2.71385e-51	0.251195	0.324	0.17	4.63688e-47
Atp6v1h	3.59335e-51	0.256808	0.337	0.186	6.1396e-47
Tmbim1	6.676e-51	0.268367	0.241	0.115	1.14066e-46
Pepd	8.37893e-51	0.283372	0.39	0.232	1.43162e-46
Hsp90ab1	9.32187e-51	0.272037	0.971	0.809	1.59274e-46
Selenof	1.02753e-50	0.227784	0.769	0.527	1.75565e-46
Ube2e1	1.47481e-50	0.261496	0.452	0.282	2.51985e-46
Tmed7	2.98732e-50	0.279698	0.401	0.241	5.10413e-46
Cd180	3.04392e-50	0.274574	0.32	0.174	5.20084e-46
Myof	3.18306e-50	0.271824	0.246	0.119	5.43858e-46
Wdr1	4.33497e-50	0.241546	0.622	0.418	7.40672e-46
Lrpap1	4.98348e-50	0.239689	0.369	0.211	8.51478e-46
Ddit3	5.17386e-50	0.298874	0.384	0.223	8.84007e-46
Sec61g	9.0994e-50	0.249632	0.872	0.659	1.55472e-45
Nfkbie	1.13385e-49	0.260412	0.243	0.116	1.93729e-45
Myl6	1.47177e-49	0.20505	0.972	0.804	2.51466e-45
Snx5	1.59713e-49	0.228811	0.721	0.5	2.72886e-45
Rraga	2.20825e-49	0.284525	0.376	0.221	3.77302e-45
Ahsa1	2.33052e-49	0.287243	0.376	0.222	3.98193e-45
Fam111a	2.75011e-49	0.278024	0.448	0.274	4.69884e-45
Maff	3.07174e-49	0.249886	0.233	0.108	5.24838e-45
Smpdl3a	3.41443e-49	0.255214	0.498	0.312	5.8339e-45
Mapkapk2	5.07215e-49	0.30475	0.383	0.229	8.66627e-45
Rexo2	5.93485e-49	0.226039	0.555	0.362	1.01403e-44
Hilpda	6.20329e-49	0.324441	0.272	0.136	1.05989e-44
Ssr4	6.85741e-49	0.221595	0.76	0.523	1.17166e-44
Lrrfip1	9.06729e-49	0.236223	0.552	0.364	1.54924e-44
Vdac2	1.06136e-48	0.242828	0.678	0.462	1.81345e-44
Uqcrc1	1.43091e-48	0.227931	0.586	0.389	2.44486e-44
Ist1	1.69697e-48	0.227523	0.279	0.143	2.89944e-44
Stam2	1.73503e-48	0.248229	0.205	0.093	2.96447e-44
Sp110	1.97617e-48	0.258975	0.383	0.223	3.37649e-44
Vav3	2.61498e-48	0.283226	0.278	0.146	4.46795e-44
Slirp	2.75634e-48	0.251244	0.505	0.331	4.70947e-44
Slc35f6	4.619e-48	0.248242	0.213	0.098	7.89203e-44
Med28	4.85729e-48	0.223937	0.602	0.404	8.29917e-44
Nrp2	6.00985e-48	0.252232	0.206	0.092	1.02684e-43
Psmd14	6.10509e-48	0.24627	0.425	0.262	1.04311e-43
Rasa4	8.64477e-48	0.26649	0.239	0.117	1.47704e-43
Ripk3	1.05021e-47	0.208874	0.201	0.09	1.7944e-43
Cyb5b	2.21358e-47	0.27793	0.31	0.172	3.78212e-43
Atp5f1	2.54062e-47	0.224203	0.859	0.599	4.3409e-43
Ccdc115	2.59567e-47	0.247495	0.326	0.184	4.43496e-43
Gsap	2.6949e-47	0.206006	0.201	0.089	4.60451e-43
Sgk3	2.9036e-47	0.275221	0.318	0.177	4.96109e-43
Ssfa2	3.04367e-47	0.214576	0.202	0.091	5.20042e-43
Dstn	3.99006e-47	0.237866	0.439	0.27	6.81742e-43
Map7d1	4.58189e-47	0.244066	0.351	0.201	7.82862e-43
Nt5c3	4.6252e-47	0.328995	0.286	0.153	7.90262e-43
Rbm7	6.7622e-47	0.228918	0.417	0.258	1.15539e-42
Grpel1	7.02756e-47	0.234416	0.452	0.287	1.20073e-42
Fgl2	7.06324e-47	0.363679	0.378	0.222	1.20683e-42
Zufsp	9.97852e-47	0.221661	0.255	0.126	1.70493e-42
Abi1	1.39084e-46	0.229623	0.436	0.273	2.37639e-42
Dnajc15	1.49244e-46	0.21124	0.607	0.409	2.54997e-42
Sde2	2.18188e-46	0.229083	0.397	0.237	3.72796e-42
Mtpn	3.41953e-46	0.223445	0.536	0.355	5.84261e-42
Uqcrb	3.7074e-46	0.209288	0.859	0.602	6.33446e-42
Psmd7	4.19356e-46	0.236217	0.495	0.323	7.16511e-42
P4hb	4.51475e-46	0.231779	0.509	0.331	7.7139e-42
Sar1b	5.31595e-46	0.234397	0.407	0.251	9.08283e-42
Mtch2	1.20496e-45	0.23284	0.455	0.288	2.0588e-41
Aldh3b1	1.79485e-45	0.255928	0.29	0.156	3.06668e-41
Tor1aip2	2.78877e-45	0.254859	0.278	0.147	4.76489e-41
Sdc4	2.90448e-45	0.317544	0.29	0.152	4.9626e-41
Rars	3.32897e-45	0.254934	0.234	0.117	5.68789e-41
Rock1	4.23395e-45	0.233895	0.501	0.329	7.23413e-41
Ugp2	4.78776e-45	0.24285	0.353	0.207	8.18036e-41
Mrpl17	4.82126e-45	0.255705	0.427	0.27	8.2376e-41
Lfng	5.30668e-45	0.218945	0.353	0.202	9.06699e-41
Parp9	5.46587e-45	0.223678	0.225	0.108	9.33898e-41
Cib1	5.62229e-45	0.214677	0.375	0.222	9.60625e-41
Cct3	5.65052e-45	0.221746	0.479	0.307	9.65447e-41
Abcg1	6.27623e-45	0.257062	0.295	0.16	1.07236e-40
Vdac3	7.71575e-45	0.236364	0.53	0.352	1.31831e-40
Slc29a3	7.91792e-45	0.267411	0.277	0.148	1.35286e-40
Dse	8.27265e-45	0.229335	0.239	0.118	1.41346e-40
Tcof1	8.88736e-45	0.208142	0.31	0.17	1.51849e-40
Vasp	1.28905e-44	0.209549	0.584	0.39	2.20247e-40
Riok3	1.30045e-44	0.258676	0.401	0.252	2.22195e-40
Atp5g1	1.39576e-44	0.21575	0.787	0.549	2.38479e-40
Prpf40a	1.94472e-44	0.220142	0.519	0.342	3.32275e-40
Mapre1	2.24227e-44	0.206273	0.55	0.366	3.83114e-40
Gng2	2.78166e-44	0.342265	0.514	0.345	4.75274e-40
Bzw1	3.00698e-44	0.224658	0.527	0.353	5.13772e-40
Arpc4	3.08703e-44	0.224993	0.607	0.421	5.27451e-40
Emc7	3.32322e-44	0.223847	0.503	0.331	5.67805e-40
Szrd1	3.4788e-44	0.225056	0.312	0.175	5.94388e-40
Ppa1	3.68442e-44	0.26193	0.281	0.152	6.29519e-40
Sowahc	4.38153e-44	0.250708	0.217	0.104	7.48628e-40
Gde1	5.23129e-44	0.301406	0.263	0.139	8.93818e-40
Psmc2	5.55595e-44	0.237689	0.439	0.28	9.4929e-40
Txnl1	9.67635e-44	0.221733	0.478	0.314	1.6533e-39
Asah1	1.01618e-43	0.230182	0.533	0.353	1.73624e-39
Degs1	1.29191e-43	0.223275	0.462	0.297	2.20735e-39
Tmem208	1.57845e-43	0.219767	0.429	0.27	2.69695e-39
Ptpro	1.6774e-43	0.260924	0.264	0.139	2.86601e-39
Glud1	2.3862e-43	0.229763	0.59	0.408	4.07705e-39
Znhit1	7.04581e-43	0.229073	0.382	0.235	1.20385e-38
Nipsnap3b	1.12669e-42	0.257109	0.342	0.204	1.92506e-38
Exosc3	1.31587e-42	0.2242	0.309	0.176	2.24829e-38
Ppib	1.99383e-42	0.201887	0.838	0.587	3.40665e-38
Vat1	2.02449e-42	0.256725	0.308	0.171	3.45904e-38
Gcsh	2.73999e-42	0.274168	0.222	0.111	4.68155e-38
Rab31	4.04016e-42	0.204102	0.205	0.097	6.90301e-38
Zfand3	4.48107e-42	0.203096	0.256	0.133	7.65635e-38
Timm17a	8.69741e-42	0.229334	0.419	0.268	1.48604e-37
Fam96b	9.1018e-42	0.220881	0.423	0.27	1.55513e-37
Crlf2	1.44806e-41	0.207909	0.525	0.351	2.47415e-37
Pira2	1.50887e-41	0.231106	0.234	0.12	2.57806e-37
Hax1	3.78578e-41	0.233369	0.299	0.17	6.46838e-37
Nsf	3.98568e-41	0.200535	0.31	0.176	6.80993e-37
Phlda1	4.45743e-41	0.223143	0.265	0.138	7.61596e-37
Elavl1	4.76656e-41	0.223959	0.376	0.233	8.14414e-37
Tax1bp1	5.80813e-41	0.278855	0.674	0.497	9.92376e-37
Clic1	8.04622e-41	0.2011	0.936	0.69	1.37478e-36
Ufm1	2.11655e-40	0.234759	0.39	0.247	3.61633e-36
Fam46a	2.16345e-40	0.22424	0.378	0.228	3.69647e-36
Cd200r1	2.88344e-40	0.287187	0.207	0.103	4.92664e-36
Stx4a	3.46107e-40	0.213093	0.42	0.269	5.91358e-36
Dram2	3.88538e-40	0.218511	0.277	0.153	6.63856e-36
Mphosph10	3.96536e-40	0.214744	0.272	0.148	6.77521e-36
Ccdc50	6.06874e-40	0.22336	0.351	0.211	1.0369e-35
Glmp	1.39528e-39	0.227146	0.462	0.301	2.38398e-35
Ube2j2	3.67015e-39	0.204128	0.423	0.276	6.27082e-35
Dync1i2	5.28801e-39	0.220205	0.351	0.213	9.03509e-35
Magt1	7.88127e-39	0.248088	0.377	0.24	1.34659e-34
2210016F16Rik	1.41651e-38	0.232478	0.349	0.215	2.42025e-34
Ptpre	2.01471e-38	0.231146	0.421	0.273	3.44234e-34
Necap2	4.24605e-38	0.201493	0.474	0.318	7.2548e-34
Phf23	5.83267e-38	0.211342	0.289	0.165	9.9657e-34
Psmd11	8.28801e-38	0.208801	0.45	0.3	1.41609e-33
Metap2	1.56046e-37	0.211002	0.497	0.339	2.6662e-33
Psmd12	1.58618e-37	0.213936	0.364	0.229	2.71015e-33
Tap1	1.75883e-37	0.231541	0.491	0.326	3.00513e-33
Pdia4	1.82421e-37	0.246728	0.317	0.188	3.11685e-33
Scamp2	1.8452e-37	0.245523	0.384	0.247	3.15271e-33
Rpf2	3.37146e-37	0.246766	0.241	0.132	5.76047e-33
Pbdc1	3.98942e-37	0.207744	0.335	0.204	6.81632e-33
Malt1	5.21173e-37	0.222741	0.349	0.208	8.90477e-33
Bbip1	5.95453e-37	0.230113	0.379	0.245	1.01739e-32
Mrps18a	7.93977e-37	0.232491	0.369	0.236	1.35659e-32
Mfsd12	9.63216e-37	0.244832	0.202	0.102	1.64575e-32
Lsm12	1.2733e-36	0.219909	0.377	0.241	2.17557e-32
Ptges3	1.68439e-36	0.203534	0.457	0.307	2.87795e-32
Tmem189	2.34396e-36	0.23045	0.314	0.187	4.0049e-32
Rab8b	3.04894e-36	0.208538	0.353	0.219	5.20943e-32
Tmem33	5.99528e-36	0.209825	0.324	0.197	1.02435e-31
Ubl4a	1.60353e-35	0.216018	0.318	0.194	2.73979e-31
Arl8b	1.70786e-35	0.213132	0.331	0.203	2.91805e-31
Snx6	2.39389e-35	0.207701	0.394	0.256	4.09019e-31
Frrs1	3.09291e-35	0.224543	0.203	0.103	5.28455e-31
Ifnar2	7.08952e-35	0.212771	0.372	0.239	1.21132e-30
Rpn1	1.80687e-34	0.23135	0.372	0.241	3.08722e-30
Dmac1	2.01449e-34	0.240745	0.448	0.305	3.44196e-30
Phf11a	2.27318e-34	0.257905	0.224	0.119	3.88395e-30
Mef2a	2.76698e-34	0.211338	0.392	0.252	4.72766e-30
Coro1c	3.51312e-34	0.213505	0.373	0.24	6.00251e-30
AI413582	5.78877e-34	0.225159	0.403	0.269	9.89069e-30
Nus1	1.61076e-33	0.22671	0.261	0.152	2.75214e-29
Dot1l	1.90978e-33	0.206516	0.227	0.123	3.26305e-29
Ppp4r2	2.11778e-33	0.228495	0.307	0.187	3.61843e-29
Aftph	5.9476e-33	0.249774	0.283	0.169	1.01621e-28
Fam213b	8.69689e-33	0.237605	0.218	0.116	1.48595e-28
Med8	1.02497e-32	0.203959	0.323	0.203	1.75126e-28
Arf2	4.56622e-31	0.216618	0.22	0.123	7.80185e-27
Batf	8.41321e-31	0.212881	0.263	0.155	1.43748e-26
Ormdl2	1.35083e-30	0.223644	0.316	0.203	2.30803e-26
Scimp	2.46782e-30	0.293972	0.231	0.132	4.21651e-26
Plgrkt	2.68735e-30	0.231515	0.392	0.267	4.5916e-26
P2ry6	3.92003e-30	0.200736	0.322	0.203	6.69776e-26
Vamp4	4.14691e-30	0.211548	0.304	0.191	7.08542e-26
Gm6377	1.69509e-28	0.235517	0.29	0.178	2.89623e-24
Kmt5a	1.73327e-27	0.203639	0.259	0.159	2.96146e-23
Gnpda1	7.99616e-26	0.200306	0.262	0.164	1.36622e-21
Tspan31	1.8487e-25	0.215106	0.286	0.187	3.15869e-21
Bak1	8.51427e-24	0.210904	0.293	0.197	1.45475e-19
Cebpa	1.0328e-15	0.209918	0.249	0.174	1.76465e-11

## Sheet: MAC2
	p_val	avg_logFC	pct.1	pct.2	p_val_adj
Pf4	0	2.56992	0.97	0.216	0
C1qa	0	2.30789	0.987	0.198	0
Mgl2	0	2.26329	0.822	0.078	0
C1qc	0	2.05384	0.985	0.229	0
Mrc1	0	2.03431	0.849	0.144	0
Selenop	0	2.0151	0.972	0.368	0
Mt1	0	1.97129	0.903	0.354	0
Trf	0	1.868	0.87	0.233	0
Ccl12	0	1.85407	0.489	0.101	0
C1qb	0	1.7789	0.978	0.238	0
Egr1	0	1.75343	0.849	0.272	0
Tmem176b	0	1.69476	0.908	0.237	0
Cd81	0	1.65729	0.88	0.194	0
Dab2	0	1.64552	0.813	0.207	0
Apoe	0	1.59905	0.974	0.315	0
Csf1r	0	1.59468	0.891	0.274	0
Cbr2	0	1.54259	0.587	0.059	0
F13a1	0	1.53987	0.595	0.129	0
Cfh	0	1.49678	0.562	0.057	0
Folr2	0	1.48753	0.399	0.09	0
Maf	0	1.48496	0.726	0.163	0
Tmem176a	0	1.4653	0.819	0.191	0
Cd163	0	1.40915	0.44	0.016	0
Ier3	0	1.39062	0.786	0.3	0
Hpgd	0	1.37015	0.61	0.072	0
Ccl24	0	1.36412	0.321	0.018	0
Fcrls	0	1.28015	0.515	0.051	0
Gas6	0	1.26889	0.5	0.074	0
Pltp	0	1.25706	0.739	0.22	0
Fcgrt	0	1.25506	0.644	0.216	0
Ctsc	0	1.23385	0.914	0.461	0
Igfbp4	0	1.23249	0.605	0.094	0
Stab1	0	1.22666	0.562	0.123	0
Serinc3	0	1.21964	0.946	0.603	0
H2-Eb1	0	1.16646	0.94	0.502	0
Wwp1	0	1.16413	0.585	0.132	0
Aif1	0	1.11082	0.856	0.383	0
Nfkbiz	0	1.10974	0.673	0.287	0
Fxyd2	0	1.09965	0.351	0.035	0
Adgre1	0	1.06593	0.679	0.223	0
Fcgr3	0	1.05025	0.805	0.293	0
Cd14	0	1.02245	0.69	0.28	0
Lilra5	0	1.02206	0.371	0.012	0
Ccl2	0	1.01523	0.68	0.266	0
H2-Aa	0	0.993992	0.945	0.507	0
Cd74	0	0.991395	0.948	0.531	0
H2-Ab1	0	0.971288	0.947	0.51	0
Itm2b	0	0.96824	0.985	0.767	0
Slco2b1	0	0.950209	0.368	0.017	0
Marcks	0	0.907738	0.835	0.447	0
Ltc4s	0	0.906044	0.255	0.032	0
Vcam1	0	0.896322	0.258	0.016	0
Clec4a2	0	0.893655	0.66	0.262	0
Timp2	0	0.884779	0.663	0.246	0
Mmp9	0	0.85349	0.269	0.032	0
Pla2g2d	0	0.834936	0.227	0.003	0
C5ar1	0	0.828388	0.667	0.236	0
St3gal6	0	0.768364	0.388	0.084	0
Smagp	0	0.752889	0.384	0.078	0
Serpinf1	0	0.64707	0.273	0.033	0
Tanc2	0	0.643777	0.246	0.019	0
Gpr34	0	0.629667	0.251	0.034	0
Lyz2	0	0.59981	0.996	0.428	0
Cst3	0	0.255157	0.988	0.602	0
Unc93b1	6.78684e-308	0.863838	0.824	0.489	1.1596e-303
Jun	3.43701e-306	1.0157	0.857	0.53	5.87247e-302
Cltc	4.61615e-306	0.958981	0.693	0.332	7.88716e-302
Clec4b1	1.28951e-305	0.829034	0.559	0.19	2.20326e-301
Blvrb	6.29744e-301	0.871229	0.685	0.294	1.07598e-296
Hspa1a	6.63699e-298	1.06955	0.738	0.348	1.134e-293
Marcksl1	8.96651e-296	0.80119	0.739	0.341	1.53202e-291
Pmp22	3.42133e-295	0.815742	0.417	0.115	5.84569e-291
Lifr	6.04342e-293	0.677267	0.282	0.053	1.03258e-288
mt-Nd1	8.43375e-293	0.963324	0.844	0.461	1.44099e-288
Fcgr2b	1.78005e-292	0.9178	0.665	0.3	3.0414e-288
Rnase4	2.81128e-292	0.802583	0.384	0.098	4.80335e-288
Slamf9	9.22731e-292	0.924684	0.514	0.176	1.57658e-287
Ctsb	1.02074e-288	0.259349	0.969	0.455	1.74404e-284
mt-Cytb	6.5357e-288	1.3009	0.724	0.364	1.11669e-283
Tnf	5.40016e-287	1.02824	0.535	0.196	9.22671e-283
Zfhx3	4.57253e-286	0.690205	0.324	0.072	7.81263e-282
Stard8	1.78422e-284	0.686292	0.274	0.052	3.04852e-280
mt-Nd4	3.15145e-283	1.17114	0.786	0.455	5.38457e-279
Cx3cr1	2.2598e-281	0.937301	0.402	0.111	3.86109e-277
Ms4a7	1.33702e-279	0.471502	0.658	0.23	2.28443e-275
Fos	2.44905e-268	0.871034	0.917	0.667	4.18445e-264
Mafb	6.10282e-267	0.82601	0.624	0.25	1.04273e-262
Cd33	1.89689e-266	0.585939	0.262	0.049	3.24102e-262
Lgmn	7.99946e-263	0.577138	0.865	0.418	1.36679e-258
Igf1	1.69839e-259	0.69865	0.497	0.156	2.90186e-255
Rgs10	3.64776e-259	0.783244	0.795	0.46	6.23257e-255
Lst1	2.11204e-258	0.641884	0.826	0.421	3.60862e-254
Cd63	2.89132e-257	0.422409	0.785	0.306	4.94012e-253
Gatm	1.67163e-251	0.791875	0.371	0.106	2.85615e-247
mt-Nd2	2.99419e-249	1.01686	0.659	0.301	5.11587e-245
mt-Atp6	3.03801e-248	0.988288	0.822	0.515	5.19074e-244
Sdc4	5.66304e-245	0.874677	0.437	0.141	9.67586e-241
Ehd4	9.372e-245	0.839087	0.667	0.345	1.6013e-240
Sult1a1	7.64717e-240	0.502503	0.222	0.039	1.3066e-235
Wfdc17	1.76657e-238	0.916109	0.818	0.44	3.01836e-234
Hspa1b	1.89523e-238	1.25121	0.483	0.182	3.23819e-234
Clec10a	2.50341e-231	1.03726	0.421	0.141	4.27732e-227
Egr2	1.03721e-229	0.784196	0.292	0.07	1.77218e-225
Itsn1	5.27142e-229	0.606038	0.269	0.061	9.00675e-225
H2-DMb1	2.40544e-228	0.679205	0.777	0.395	4.10993e-224
Slc9a9	6.25953e-223	0.629099	0.262	0.059	1.0695e-218
Pea15a	2.19006e-222	0.777539	0.443	0.166	3.74193e-218
Glul	2.86603e-222	0.818804	0.552	0.243	4.8969e-218
H2-DMa	1.36575e-220	0.713776	0.842	0.512	2.33352e-216
Mt2	1.91168e-220	0.816899	0.216	0.04	3.26629e-216
mt-Co2	8.39276e-219	1.00817	0.769	0.466	1.43399e-214
Fcer1g	4.01601e-218	0.564516	0.984	0.607	6.86175e-214
mt-Co3	5.21602e-215	1.02248	0.785	0.516	8.91209e-211
Zfp36l1	6.17809e-214	0.730995	0.727	0.382	1.05559e-209
Ccl8	7.25273e-214	1.52926	0.246	0.053	1.2392e-209
Cd302	1.52987e-208	0.716229	0.465	0.184	2.61394e-204
Tgfbi	3.53302e-207	0.655984	0.701	0.357	6.03652e-203
Rps29	1.46593e-206	0.473257	0.991	0.892	2.50468e-202
B4galt6	1.10048e-203	0.659552	0.312	0.09	1.88028e-199
Hexim1	5.91806e-201	0.73539	0.509	0.207	1.01116e-196
Ftl1	5.0585e-198	0.205366	0.991	0.714	8.64295e-194
Cxcl16	1.49563e-189	0.689941	0.561	0.268	2.55543e-185
Zfp36	9.27585e-189	0.850742	0.774	0.534	1.58487e-184
Hmox1	1.16262e-188	0.603764	0.542	0.245	1.98646e-184
Cd300ld	4.59182e-188	0.623826	0.435	0.166	7.84558e-184
Rtn4	8.31928e-187	0.69983	0.749	0.49	1.42143e-182
C3ar1	1.95155e-186	0.630294	0.533	0.222	3.33442e-182
Nfxl1	2.10721e-183	0.53329	0.227	0.052	3.60038e-179
mt-Nd3	7.46844e-183	0.704966	0.605	0.288	1.27606e-178
Dse	2.28561e-180	0.633036	0.335	0.11	3.9052e-176
Ly86	6.68344e-175	0.660205	0.759	0.483	1.14193e-170
Rab3il1	9.99638e-174	0.637742	0.341	0.117	1.70798e-169
Sirpa	5.48585e-172	0.691948	0.605	0.316	9.37312e-168
Gas7	1.05155e-169	0.632262	0.334	0.113	1.79667e-165
App	1.88232e-167	0.692256	0.593	0.325	3.21614e-163
Pid1	5.46135e-167	0.623818	0.622	0.338	9.33126e-163
Tgfbr2	8.72011e-167	0.579906	0.41	0.157	1.48992e-162
Aoah	3.52093e-165	0.531536	0.24	0.063	6.01585e-161
Rplp1	3.07303e-164	0.378694	0.975	0.861	5.25058e-160
mt-Nd4l	1.48772e-161	0.671727	0.472	0.208	2.54193e-157
Txnip	9.04618e-160	0.556324	0.636	0.326	1.54563e-155
Mef2c	1.08126e-158	0.437871	0.621	0.311	1.84745e-154
Kctd12	1.37493e-156	0.687287	0.583	0.32	2.3492e-152
Cd36	8.75584e-155	0.559629	0.591	0.303	1.49602e-150
Tmcc1	3.33865e-152	0.63217	0.408	0.167	5.70441e-148
Cited2	4.90887e-151	0.707818	0.561	0.298	8.3873e-147
Hpgds	7.64454e-151	0.638155	0.358	0.137	1.30615e-146
BC005537	4.52549e-149	0.672394	0.666	0.418	7.73225e-145
Dusp1	2.11237e-147	0.555093	0.824	0.58	3.60919e-143
Pros1	3.68337e-145	0.505682	0.215	0.057	6.2934e-141
Ifitm2	4.75083e-145	0.422408	0.847	0.531	8.11727e-141
Pld4	1.00259e-144	0.595102	0.689	0.43	1.71303e-140
Grn	1.9413e-144	0.473805	0.786	0.474	3.31691e-140
mt-Co1	3.74631e-144	0.820703	0.796	0.607	6.40095e-140
Ppp1r10	8.96769e-144	0.662339	0.445	0.205	1.53222e-139
Cybb	3.26248e-143	0.490006	0.737	0.42	5.57427e-139
Serpinb8	4.92036e-143	0.551329	0.262	0.082	8.40693e-139
Retnla	5.90858e-143	1.89756	0.252	0.073	1.00954e-138
Runx1	5.983e-143	0.696951	0.429	0.197	1.02226e-138
Ccl7	2.53691e-141	0.97015	0.444	0.197	4.33457e-137
Pla2g7	1.14414e-139	0.51614	0.484	0.219	1.95488e-135
Lamp2	5.10801e-136	0.586575	0.644	0.392	8.72755e-132
Frmd4b	6.92291e-136	0.588689	0.32	0.122	1.18285e-131
Abca1	1.88541e-134	0.565555	0.267	0.087	3.22141e-130
Adrb2	9.39669e-134	0.575153	0.309	0.11	1.60552e-129
Axl	1.1529e-133	0.615051	0.38	0.162	1.96984e-129
Ptpn18	2.60907e-133	0.491688	0.836	0.618	4.45786e-129
P2ry6	5.8177e-133	0.641618	0.411	0.196	9.94012e-129
Wsb1	5.94899e-133	0.63465	0.547	0.307	1.01644e-128
Clec4a1	1.39922e-131	0.538451	0.518	0.26	2.3907e-127
Zeb2	2.56064e-131	0.53104	0.675	0.396	4.37511e-127
Atpif1	3.61704e-129	0.54238	0.776	0.533	6.18007e-125
Camk1	5.13501e-129	0.597584	0.402	0.185	8.77367e-125
Serpinb6a	1.45388e-127	0.62695	0.386	0.164	2.4841e-123
Cebpd	1.57922e-127	0.587279	0.336	0.133	2.69826e-123
Gna12	4.58264e-126	0.511407	0.241	0.078	7.8299e-122
Asah1	6.39836e-126	0.641648	0.567	0.35	1.09322e-121
Lacc1	1.51242e-124	0.539827	0.298	0.114	2.58412e-120
Comt	1.74384e-124	0.58305	0.655	0.43	2.97952e-120
Cd86	6.60123e-124	0.638956	0.468	0.241	1.12789e-119
Lpl	4.681e-122	0.339573	0.548	0.266	7.99796e-118
Snx5	4.84181e-122	0.521128	0.729	0.498	8.27271e-118
Hexa	1.54828e-119	0.443757	0.735	0.466	2.64538e-115
Hacd4	1.98073e-118	0.541358	0.395	0.18	3.38427e-114
Aplp2	2.8255e-118	0.573606	0.527	0.298	4.82766e-114
Rhob	4.02324e-116	0.64419	0.461	0.236	6.8741e-112
Dnajb9	1.94368e-113	0.617174	0.438	0.223	3.32097e-109
Atf3	3.72521e-113	0.65737	0.706	0.481	6.3649e-109
Lamp1	4.24864e-113	0.355675	0.839	0.531	7.25922e-109
Ptprj	2.07675e-112	0.557737	0.343	0.149	3.54833e-108
Btg2	2.43136e-110	0.472516	0.832	0.644	4.15422e-106
Clec12a	3.12786e-109	0.626117	0.566	0.354	5.34426e-105
Tbxas1	3.41563e-109	0.523523	0.296	0.123	5.83595e-105
Rbpj	5.93185e-108	0.591992	0.469	0.264	1.01352e-103
Rrbp1	7.94684e-107	0.491764	0.727	0.524	1.3578e-102
Cxcl2	2.81913e-106	0.828742	0.541	0.294	4.81677e-102
Rnasel	5.37625e-106	0.458652	0.206	0.065	9.18587e-102
Ap2a2	1.00915e-105	0.59708	0.364	0.175	1.72424e-101
Sesn1	1.80605e-105	0.409063	0.215	0.069	3.08582e-101
Anxa5	5.33766e-104	0.382422	0.811	0.544	9.11993e-100
Dhrs3	1.18328e-102	0.527158	0.436	0.228	2.02175e-98
Tyrobp	1.36874e-102	0.282408	0.962	0.646	2.33862e-98
Pla2g15	5.14984e-102	0.457023	0.225	0.078	8.79902e-98
Vsir	5.9597e-101	0.533543	0.554	0.346	1.01827e-96
Sdc3	6.73793e-101	0.598872	0.445	0.253	1.15124e-96
2610507B11Rik	1.18791e-100	0.477408	0.292	0.122	2.02966e-96
Sec14l1	2.57392e-100	0.469433	0.259	0.1	4.3978e-96
Ier5	3.43668e-100	0.526254	0.785	0.616	5.8719e-96
Icam1	1.13529e-98	0.674185	0.488	0.289	1.93976e-94
Fam46a	1.20819e-97	0.548147	0.426	0.223	2.06432e-93
Irf1	4.43228e-97	0.480459	0.431	0.222	7.573e-93
Casp4	6.66061e-96	0.589213	0.352	0.17	1.13803e-91
Gm34084	8.38852e-96	0.609514	0.359	0.174	1.43326e-91
Adap2	1.17943e-95	0.490611	0.264	0.107	2.01517e-91
Lyl1	1.18755e-95	0.494465	0.293	0.126	2.02905e-91
mt-Nd5	5.10905e-95	0.440381	0.657	0.422	8.72932e-91
Clta	9.98951e-95	0.406749	0.875	0.685	1.70681e-90
Ctsa	2.08251e-94	0.465753	0.634	0.411	3.55818e-90
Gm20594	2.19876e-94	0.467324	0.21	0.071	3.7568e-90
Ubc	2.99406e-92	0.420653	0.893	0.769	5.11564e-88
Ifi207	1.33774e-91	0.583082	0.572	0.369	2.28567e-87
Tmem256	6.44845e-91	0.534594	0.61	0.435	1.10178e-86
Sertad1	9.77559e-91	0.535707	0.567	0.369	1.67026e-86
Man2b1	9.7999e-91	0.508448	0.568	0.367	1.67441e-86
Atp2b1	1.92691e-90	0.425039	0.765	0.568	3.29232e-86
Gadd45b	4.12549e-88	0.399293	0.664	0.444	7.04882e-84
Pdcd2l	2.17851e-85	0.52015	0.304	0.146	3.7222e-81
Ly96	3.68546e-85	0.490461	0.305	0.145	6.29697e-81
Ddx3x	3.13318e-84	0.456022	0.571	0.377	5.35335e-80
Laptm4a	3.56044e-84	0.463314	0.622	0.446	6.08337e-80
Nenf	3.76841e-84	0.494259	0.402	0.228	6.43871e-80
Lair1	1.25895e-82	0.461884	0.34	0.168	2.15104e-78
Lcp1	1.83422e-81	0.463162	0.773	0.6	3.13394e-77
Lilr4b	3.03766e-80	0.43292	0.549	0.341	5.19015e-76
Ccl3	4.95201e-80	0.952027	0.47	0.291	8.46101e-76
Lpcat2	7.92224e-80	0.389765	0.219	0.084	1.35359e-75
Fam213b	3.34759e-79	0.476402	0.258	0.113	5.71969e-75
Mob3c	2.04241e-77	0.386855	0.212	0.082	3.48966e-73
Arrb2	6.34357e-77	0.501226	0.399	0.231	1.08386e-72
Cyfip1	7.10546e-77	0.543197	0.418	0.254	1.21404e-72
Nrp1	2.8722e-76	0.525125	0.361	0.201	4.90745e-72
Myo5a	7.54933e-76	0.503894	0.326	0.169	1.28988e-71
Zeb2os	1.46901e-74	0.491197	0.312	0.158	2.50994e-70
Adam15	3.92435e-74	0.461277	0.275	0.13	6.70514e-70
Cyth4	9.62405e-74	0.480823	0.534	0.364	1.64436e-69
Rsrp1	4.37683e-73	0.452443	0.709	0.56	7.47825e-69
Abhd12	7.70193e-73	0.484512	0.451	0.283	1.31595e-68
Vkorc1	3.71023e-72	0.410795	0.258	0.118	6.3393e-68
Mat2a	3.97633e-72	0.481586	0.559	0.393	6.79395e-68
Ap1b1	4.82653e-72	0.47497	0.246	0.111	8.24661e-68
Tceal9	6.43597e-72	0.492255	0.427	0.263	1.09965e-67
Lrrc25	1.48605e-71	0.446766	0.49	0.317	2.53907e-67
Sema4a	7.65277e-70	0.492028	0.31	0.161	1.30755e-65
Eps15	4.88919e-69	0.475704	0.304	0.157	8.35368e-65
Man1a	6.64507e-68	0.349723	0.348	0.18	1.13538e-63
Ctsh	4.00591e-67	0.300744	0.78	0.559	6.8445e-63
Spred1	3.43852e-66	0.402838	0.22	0.096	5.87506e-62
Hexb	3.72228e-65	0.530776	0.534	0.377	6.35988e-61
Tm6sf1	4.39007e-65	0.4633	0.507	0.35	7.50087e-61
Selenom	8.81489e-65	0.373616	0.234	0.105	1.50611e-60
Srsf2	2.32342e-64	0.403807	0.72	0.575	3.96979e-60
Klf6	4.68016e-64	0.441242	0.809	0.677	7.99653e-60
Slc11a1	1.20801e-63	0.330023	0.417	0.236	2.06401e-59
Socs3	1.33761e-63	0.540394	0.371	0.213	2.28544e-59
Tceal8	5.55534e-63	0.456762	0.233	0.109	9.49185e-59
Eid1	6.88033e-63	0.457271	0.338	0.193	1.17557e-58
Hprt	8.73879e-63	0.452333	0.508	0.357	1.49311e-58
Clec4a3	1.07322e-62	0.331405	0.484	0.299	1.8337e-58
Ptp4a2	7.63144e-62	0.375489	0.696	0.559	1.30391e-57
Evi2a	2.39488e-60	0.393474	0.576	0.414	4.09189e-56
Fosb	2.70025e-60	0.403431	0.66	0.499	4.61364e-56
Itpripl2	5.92329e-60	0.418871	0.212	0.096	1.01205e-55
Tmem37	2.29979e-59	0.371534	0.209	0.091	3.92942e-55
Cfp	2.5051e-59	0.517189	0.497	0.344	4.28021e-55
Mrfap1	3.71042e-59	0.420586	0.628	0.493	6.33963e-55
Dok2	6.61391e-58	0.415095	0.382	0.224	1.13005e-53
Mfsd11	1.30007e-57	0.418137	0.225	0.106	2.2213e-53
Plxnb2	3.3223e-57	0.443197	0.28	0.15	5.67648e-53
Itm2c	4.04852e-57	0.437578	0.508	0.364	6.9173e-53
Ptafr	1.0065e-56	0.450424	0.356	0.211	1.7197e-52
Brd2	2.49011e-56	0.424979	0.587	0.445	4.25461e-52
Ntpcr	3.21535e-56	0.414627	0.224	0.107	5.49375e-52
Picalm	1.42117e-55	0.420239	0.455	0.309	2.42821e-51
Prcp	1.33873e-54	0.421595	0.484	0.342	2.28736e-50
Tcf4	1.61953e-54	0.281063	0.394	0.237	2.76712e-50
Lmo2	2.21926e-54	0.372412	0.4	0.256	3.79182e-50
Fam174a	2.61691e-54	0.401664	0.446	0.309	4.47125e-50
Neurl3	6.29137e-54	0.326427	0.351	0.199	1.07494e-49
Sbno2	8.43394e-54	0.463124	0.348	0.208	1.44102e-49
Ifi27	2.61484e-53	0.354818	0.377	0.225	4.46772e-49
Prdx4	2.96311e-53	0.414338	0.358	0.221	5.06277e-49
Cndp2	3.65384e-53	0.369239	0.462	0.305	6.24294e-49
Gm42418	5.28143e-51	0.658496	0.677	0.524	9.02386e-47
Canx	8.65561e-51	0.421356	0.562	0.434	1.4789e-46
Atf4	4.97821e-50	0.332426	0.634	0.489	8.50577e-46
Atp6v0b	5.69883e-50	0.2912	0.73	0.566	9.73701e-46
Tmem59	1.33412e-49	0.362255	0.589	0.459	2.27948e-45
Tpp1	2.27542e-49	0.401964	0.328	0.197	3.88778e-45
Dusp6	2.98198e-49	0.334866	0.208	0.097	5.09501e-45
Fcgr4	5.7525e-49	0.407266	0.306	0.173	9.82873e-45
Il10ra	3.23983e-48	0.31585	0.282	0.155	5.53557e-44
Ppp1r15a	7.56474e-48	0.316782	0.612	0.467	1.29251e-43
Rnf130	1.41439e-47	0.346785	0.511	0.372	2.41663e-43
Irf2bp2	3.26016e-47	0.405276	0.325	0.197	5.57031e-43
Cmtm6	4.67237e-47	0.374184	0.328	0.199	7.98321e-43
Cadm1	5.21893e-47	0.368943	0.206	0.099	8.91706e-43
Mcl1	1.37079e-46	0.34979	0.717	0.596	2.34213e-42
Dstn	2.22769e-46	0.369496	0.403	0.271	3.80624e-42
Rgl1	4.9008e-46	0.371982	0.3	0.172	8.37351e-42
Clec2d	4.16673e-45	0.350565	0.277	0.153	7.11927e-41
Sgpp1	4.80078e-45	0.378061	0.215	0.11	8.20262e-41
Arhgap18	9.2018e-45	0.438408	0.274	0.159	1.57222e-40
Tcn2	2.01322e-44	0.358708	0.228	0.121	3.43979e-40
Pou2f2	2.37226e-44	0.278157	0.353	0.208	4.05324e-40
Kdm6b	3.25611e-44	0.33032	0.446	0.304	5.56338e-40
Dennd5a	8.6191e-44	0.351374	0.248	0.137	1.47266e-39
Ptpro	9.57736e-44	0.350376	0.25	0.139	1.63639e-39
Ccl4	1.06417e-43	0.633963	0.475	0.331	1.81825e-39
Rhoc	2.32957e-43	0.32336	0.233	0.123	3.9803e-39
Dcxr	2.44844e-43	0.376161	0.255	0.144	4.18341e-39
Ier2	3.02593e-43	0.375199	0.719	0.605	5.17011e-39
Mtss1	3.4296e-43	0.388845	0.351	0.222	5.85981e-39
Fgd2	4.2215e-43	0.331019	0.297	0.176	7.21286e-39
Tmem50a	4.2728e-43	0.300871	0.649	0.526	7.30051e-39
Tmcc3	4.95138e-43	0.356942	0.209	0.104	8.45993e-39
Dmac1	1.30299e-42	0.410692	0.423	0.305	2.2263e-38
Hfe	1.38785e-42	0.365804	0.317	0.195	2.37127e-38
Ccr5	1.43683e-42	0.439781	0.325	0.204	2.45497e-38
Dnase2a	4.78639e-42	0.392333	0.315	0.2	8.17803e-38
Uqcr11	5.0227e-42	0.331535	0.621	0.504	8.58178e-38
Pdlim4	1.26261e-41	0.286467	0.201	0.101	2.15729e-37
Klf4	2.89183e-41	0.407701	0.606	0.471	4.94098e-37
Tuba1b	3.82514e-41	0.209221	0.657	0.514	6.53563e-37
Scimp	4.99858e-41	0.328825	0.238	0.131	8.54058e-37
Bcl2a1b	7.95692e-41	0.347894	0.484	0.34	1.35952e-36
Fez2	9.46414e-41	0.319566	0.213	0.112	1.61704e-36
Ccnl1	1.01664e-40	0.329603	0.662	0.548	1.73704e-36
Ciita	6.74616e-40	0.355317	0.302	0.185	1.15265e-35
Idh2	8.65741e-40	0.407118	0.266	0.161	1.47921e-35
Gpr65	2.75687e-39	0.398918	0.24	0.136	4.71038e-35
Lamtor4	3.10794e-39	0.296522	0.522	0.39	5.31022e-35
Fam129a	3.4494e-39	0.335144	0.284	0.174	5.89364e-35
Slc29a1	5.75827e-39	0.337064	0.213	0.115	9.83857e-35
Cmtm3	9.78593e-39	0.371851	0.337	0.226	1.67202e-34
Cd83	1.77456e-38	0.396843	0.58	0.444	3.03201e-34
Tubb2a	2.21183e-38	0.353304	0.408	0.289	3.77913e-34
Rassf4	2.93904e-38	0.358766	0.434	0.317	5.02164e-34
Il6ra	9.30161e-38	0.333657	0.332	0.218	1.58927e-33
Mknk1	6.31827e-37	0.337402	0.21	0.115	1.07954e-32
Zfand5	1.40636e-36	0.314571	0.628	0.512	2.40291e-32
Rock2	2.4695e-36	0.33376	0.275	0.168	4.21939e-32
Hsp90aa1	4.65794e-36	0.270387	0.826	0.719	7.95855e-32
Arap1	6.73003e-36	0.311828	0.236	0.136	1.14989e-31
Dbi	8.73122e-36	0.205096	0.675	0.539	1.49182e-31
Clec4n	1.12208e-35	0.285086	0.216	0.116	1.91718e-31
Tfe3	1.91725e-35	0.306606	0.209	0.115	3.27582e-31
Batf3	2.11663e-35	0.354583	0.293	0.185	3.61648e-31
Dpm3	3.31989e-35	0.329693	0.397	0.281	5.67237e-31
Wnk1	3.95893e-35	0.256732	0.563	0.439	6.76423e-31
Dpysl2	7.86481e-35	0.339758	0.249	0.149	1.34378e-30
Vmp1	1.89159e-34	0.352059	0.34	0.235	3.23196e-30
Itgb5	2.02141e-34	0.337044	0.222	0.127	3.45378e-30
Slc43a2	2.48646e-34	0.347825	0.237	0.139	4.24837e-30
Nfkbid	7.1141e-34	0.285962	0.369	0.247	1.21551e-29
Rin2	9.82293e-34	0.329173	0.207	0.117	1.67835e-29
Eps8	1.16024e-33	0.397012	0.295	0.193	1.98239e-29
Bmyc	1.64733e-33	0.338439	0.308	0.202	2.81463e-29
Vamp8	3.6955e-33	0.245403	0.705	0.584	6.31413e-29
Qk	8.26757e-33	0.330667	0.331	0.228	1.4126e-28
Gm10073	4.9311e-32	0.254533	0.485	0.369	8.42527e-28
Slc39a1	5.42567e-32	0.345721	0.22	0.128	9.2703e-28
Msr1	1.46115e-31	0.224672	0.269	0.162	2.49653e-27
Rps12-ps3	1.86912e-31	0.222819	0.274	0.166	3.19358e-27
Scpep1	1.88567e-31	0.337185	0.318	0.22	3.22186e-27
Fnbp1	5.91885e-31	0.295563	0.314	0.211	1.01129e-26
Ninj1	1.16616e-30	0.238268	0.477	0.34	1.99249e-26
Hnrnph1	2.18759e-30	0.277895	0.405	0.292	3.73771e-26
Clk1	5.22861e-30	0.230907	0.511	0.391	8.93361e-26
Myadm	1.39296e-29	0.347836	0.361	0.264	2.38002e-25
Aldh2	2.02362e-29	0.292684	0.439	0.329	3.45755e-25
Rnf13	2.08097e-29	0.32938	0.31	0.216	3.55555e-25
Mylip	2.77974e-29	0.282278	0.225	0.132	4.74947e-25
Tlr2	2.86733e-29	0.272463	0.274	0.175	4.89912e-25
Il10rb	4.36698e-29	0.292667	0.447	0.337	7.46141e-25
Ptpre	8.07745e-29	0.307921	0.374	0.275	1.38011e-24
Arhgap17	9.7969e-29	0.33317	0.332	0.235	1.6739e-24
Ppp1r12c	1.32941e-28	0.303097	0.209	0.124	2.27143e-24
Phlda1	1.73283e-28	0.421347	0.229	0.139	2.96071e-24
Nr3c1	5.45464e-28	0.279973	0.33	0.231	9.3198e-24
Fus	2.91594e-27	0.202563	0.67	0.566	4.98217e-23
Ndufc2	4.29529e-27	0.278651	0.594	0.499	7.33893e-23
Tacc1	4.93559e-27	0.261971	0.349	0.249	8.43296e-23
Mef2a	6.47806e-27	0.303151	0.35	0.254	1.10684e-22
Rpl10-ps3	1.90398e-26	0.27649	0.416	0.317	3.25313e-22
Gls	3.45026e-26	0.319029	0.339	0.244	5.89511e-22
S100a1	4.86878e-26	0.291296	0.276	0.189	8.31879e-22
Mapkapk2	8.80052e-26	0.305195	0.32	0.232	1.50366e-21
Ubap2l	1.03076e-25	0.303605	0.4	0.31	1.76115e-21
Nisch	1.6009e-25	0.29273	0.319	0.228	2.7353e-21
Nav1	2.27576e-25	0.308773	0.217	0.137	3.88836e-21
Scamp2	2.56324e-25	0.331651	0.334	0.249	4.37955e-21
Daglb	3.26553e-25	0.329481	0.236	0.154	5.57948e-21
Ucp2	6.59901e-25	0.222809	0.689	0.573	1.12751e-20
Tmem106a	7.19725e-25	0.291537	0.376	0.28	1.22972e-20
Csf2ra	1.86561e-24	0.344733	0.354	0.274	3.18759e-20
Mcub	2.05612e-24	0.300736	0.371	0.283	3.51309e-20
Nufip2	5.87042e-24	0.243458	0.274	0.183	1.00302e-19
Cebpa	7.37181e-24	0.292543	0.255	0.173	1.25955e-19
Snx2	1.04254e-23	0.332037	0.469	0.386	1.78129e-19
Hsd17b11	1.59734e-23	0.270435	0.208	0.132	2.72921e-19
Cdk6	2.01749e-23	0.291095	0.222	0.143	3.44708e-19
Romo1	2.30354e-23	0.289834	0.43	0.35	3.93583e-19
Neu1	4.92758e-23	0.273803	0.273	0.19	8.41926e-19
Cflar	5.74126e-23	0.265818	0.344	0.254	9.80952e-19
Snx3	1.17978e-22	0.255175	0.621	0.529	2.01578e-18
Map3k8	1.47582e-22	0.256418	0.302	0.218	2.52158e-18
Gnaq	4.3236e-22	0.296473	0.201	0.129	7.38731e-18
Tomm7	5.26008e-22	0.214741	0.654	0.569	8.98738e-18
Fcho2	7.00468e-22	0.270996	0.226	0.148	1.19682e-17
Polr2a	2.09524e-21	0.273051	0.286	0.204	3.57993e-17
Bsg	2.27309e-21	0.254163	0.534	0.464	3.88381e-17
Sh3bgrl	2.77924e-21	0.285451	0.464	0.392	4.74861e-17
Erp29	3.30269e-21	0.207745	0.627	0.53	5.64297e-17
Ost4	3.40139e-21	0.209482	0.648	0.57	5.81162e-17
Nfic	4.64942e-21	0.250028	0.205	0.133	7.944e-17
Rab7b	4.69063e-21	0.221408	0.415	0.316	8.01441e-17
Slc15a3	7.16123e-21	0.273449	0.283	0.203	1.22357e-16
Dnase1l1	1.99667e-20	0.304506	0.238	0.167	3.41151e-16
Ptpra	2.23524e-20	0.283472	0.312	0.236	3.81913e-16
Chka	2.72112e-20	0.294399	0.241	0.163	4.6493e-16
Ifnar2	4.46314e-20	0.290982	0.317	0.242	7.62572e-16
Ftl1-ps1	4.74701e-20	0.245243	0.383	0.3	8.11074e-16
Apobec1	7.70071e-19	0.258995	0.313	0.236	1.31574e-14
9930111J21Rik2	9.20981e-19	0.236635	0.276	0.199	1.57359e-14
1500011K16Rik	1.10231e-18	0.289759	0.261	0.193	1.88341e-14
Chd4	1.55431e-18	0.238282	0.421	0.351	2.65569e-14
Gapvd1	1.71596e-18	0.259103	0.239	0.168	2.93189e-14
Tab2	2.34793e-18	0.239199	0.292	0.217	4.01167e-14
Lrp1	2.3899e-18	0.257134	0.294	0.218	4.08339e-14
Ccdc50	3.27573e-18	0.271444	0.287	0.215	5.59691e-14
Atp6ap2	4.44019e-18	0.25761	0.406	0.34	7.58651e-14
Rab14	5.51817e-18	0.238997	0.513	0.446	9.42834e-14
Dazap2	7.41077e-18	0.207335	0.57	0.502	1.2662e-13
Leprot	7.75474e-18	0.273125	0.291	0.224	1.32498e-13
Snx6	8.3751e-18	0.291738	0.325	0.26	1.43097e-13
Mrpl23	1.22209e-17	0.257096	0.457	0.396	2.08806e-13
Mfsd1	1.34075e-17	0.305663	0.287	0.221	2.2908e-13
Acvrl1	1.43877e-17	0.265904	0.227	0.161	2.45829e-13
Nfam1	3.16546e-17	0.242078	0.268	0.199	5.4085e-13
Gns	6.49031e-17	0.300242	0.291	0.227	1.10894e-12
Slc6a6	9.97884e-17	0.265965	0.418	0.354	1.70498e-12
Mapk14	1.08921e-16	0.268081	0.264	0.198	1.86102e-12
Herpud1	1.17648e-16	0.21816	0.36	0.28	2.01013e-12
Milr1	1.22216e-16	0.268688	0.245	0.18	2.08818e-12
Rassf2	1.91265e-16	0.224946	0.204	0.138	3.26795e-12
Snhg12	2.25244e-16	0.200608	0.223	0.153	3.84852e-12
Atraid	2.34806e-16	0.261463	0.315	0.251	4.0119e-12
Fuca1	3.23873e-16	0.228456	0.42	0.356	5.53369e-12
Pnp	7.22781e-16	0.256252	0.422	0.364	1.23494e-11
Cbl	8.92443e-16	0.210318	0.322	0.253	1.52483e-11
Birc3	1.00989e-15	0.204044	0.249	0.177	1.7255e-11
Hsbp1	1.26383e-15	0.227619	0.453	0.399	2.15937e-11
Fnip1	1.64926e-15	0.215895	0.209	0.146	2.81792e-11
Snrpb2	3.53835e-15	0.233351	0.39	0.331	6.04562e-11
Nckap1l	8.12063e-15	0.243828	0.3	0.243	1.38749e-10
2610001J05Rik	3.08983e-14	0.247278	0.385	0.327	5.27928e-10
Cln8	4.21714e-14	0.239528	0.227	0.168	7.20541e-10
Synj1	4.54671e-14	0.248902	0.273	0.214	7.76851e-10
Anapc13	6.83283e-14	0.243415	0.371	0.317	1.16746e-09
Gltp	7.3229e-14	0.201177	0.525	0.457	1.25119e-09
Sgpl1	7.73071e-14	0.280561	0.259	0.203	1.32087e-09
Nabp1	1.51082e-13	0.228818	0.257	0.195	2.58138e-09
Pip4k2a	2.52807e-13	0.249697	0.297	0.241	4.31946e-09
Eif1a	1.30294e-12	0.265924	0.31	0.258	2.2262e-08
P2rx4	1.40068e-12	0.220564	0.363	0.304	2.39321e-08
Atp6v1a	1.73629e-12	0.207262	0.333	0.272	2.96663e-08
Vma21	1.76698e-12	0.276114	0.256	0.205	3.01907e-08
Ralbp1	2.13201e-12	0.203366	0.376	0.322	3.64276e-08
Ergic3	2.5295e-12	0.234046	0.325	0.278	4.32191e-08
Ripk1	2.55193e-12	0.228902	0.238	0.184	4.36022e-08
Washc2	3.19464e-12	0.206598	0.225	0.171	5.45836e-08
Mcfd2	3.35945e-12	0.223497	0.217	0.164	5.73995e-08
5031439G07Rik	3.63421e-12	0.255085	0.275	0.227	6.20942e-08
Rragc	6.29112e-12	0.232354	0.259	0.207	1.0749e-07
Epn1	6.68656e-12	0.216713	0.305	0.254	1.14246e-07
Tep1	7.61847e-12	0.239713	0.292	0.24	1.30169e-07
Shtn1	8.96178e-12	0.237777	0.205	0.156	1.53121e-07
Fkbp2	1.02458e-11	0.21849	0.423	0.374	1.75059e-07
Arpc4	1.32188e-11	0.214386	0.466	0.429	2.25856e-07
Jmjd1c	1.79235e-11	0.203956	0.389	0.335	3.0624e-07
Atp6ap1	1.81533e-11	0.205342	0.396	0.343	3.10167e-07
Hmgcl	2.24775e-11	0.223217	0.248	0.198	3.84051e-07
Pepd	2.47592e-11	0.326896	0.279	0.238	4.23035e-07
Gm6377	1.58613e-10	0.273208	0.23	0.182	2.71006e-06
Tnfaip8l2	1.66884e-10	0.211629	0.323	0.274	2.85138e-06
P4hb	2.75883e-10	0.246088	0.377	0.339	4.71374e-06
Etv3	2.91405e-10	0.224129	0.257	0.204	4.97894e-06
Pgrmc1	4.53334e-10	0.225051	0.22	0.173	7.74567e-06
Dnajb14	5.21723e-10	0.264215	0.246	0.201	8.91415e-06
Snx17	6.14019e-10	0.220307	0.275	0.232	1.04911e-05
Gadd45g	1.81132e-09	0.230224	0.247	0.199	3.09481e-05
Nars	6.57879e-09	0.200465	0.299	0.259	0.000112405
Cnpy2	1.14961e-08	0.236647	0.288	0.252	0.000196422
H2-M3	1.26126e-08	0.209289	0.269	0.228	0.000215498
Acat1	1.58607e-08	0.201122	0.228	0.188	0.000270997
Tm9sf2	5.60399e-08	0.2319	0.232	0.195	0.000957498
Nop58	7.30424e-08	0.237423	0.245	0.206	0.001248
Smim11	1.61774e-07	0.201807	0.284	0.248	0.00276407
Reep3	2.20649e-07	0.235622	0.286	0.254	0.00377001
Snap23	2.48053e-07	0.201249	0.289	0.257	0.00423823
Tmco1	4.85328e-07	0.202382	0.304	0.275	0.00829232

## Sheet: MAC1
	p_val	avg_logFC	pct.1	pct.2	p_val_adj
Ctsd	0	2.63759	0.967	0.283	0
Gpnmb	0	2.58778	0.783	0.079	0
Ctsb	0	2.35338	0.984	0.39	0
Lgals3	0	2.10612	0.958	0.433	0
Ms4a7	0	2.09484	0.843	0.143	0
Apoe	0	2.07595	0.789	0.273	0
Fabp5	0	2.04082	0.724	0.16	0
Spp1	0	2.0047	0.605	0.125	0
Trem2	0	1.98695	0.863	0.119	0
Fth1	0	1.8537	0.987	0.691	0
Ftl1	0	1.85192	0.99	0.682	0
Ctss	0	1.81184	0.982	0.586	0
Cd63	0	1.79385	0.912	0.224	0
Plin2	0	1.79297	0.956	0.319	0
Ctsl	0	1.73261	0.802	0.198	0
Cd68	0	1.70342	0.948	0.376	0
C1qb	0	1.64794	0.748	0.195	0
Capg	0	1.64359	0.941	0.301	0
Cstb	0	1.62592	0.959	0.433	0
Lgmn	0	1.60584	0.957	0.347	0
Lpl	0	1.511	0.772	0.188	0
Igf1	0	1.48824	0.667	0.082	0
Grn	0	1.40548	0.941	0.407	0
Lgals1	0	1.3953	0.971	0.493	0
Hexa	0	1.38331	0.907	0.401	0
C1qc	0	1.37616	0.731	0.188	0
Lamp1	0	1.36699	0.941	0.474	0
Syngr1	0	1.36261	0.579	0.03	0
Akr1a1	0	1.35418	0.948	0.519	0
Prdx1	0	1.34767	0.949	0.567	0
Psap	0	1.34166	0.966	0.582	0
Rgs1	0	1.31763	0.799	0.27	0
Creg1	0	1.3092	0.863	0.353	0
Selenop	0	1.29869	0.769	0.336	0
Timp2	0	1.28624	0.807	0.169	0
C3ar1	0	1.25593	0.799	0.133	0
Gdf15	0	1.2465	0.514	0.058	0
Lyz2	0	1.22254	0.934	0.373	0
Itm2b	0	1.19812	0.965	0.745	0
C1qa	0	1.17971	0.619	0.176	0
Mmp12	0	1.14591	0.29	0.042	0
Ninj1	0	1.14336	0.848	0.251	0
Ctsz	0	1.13274	0.943	0.512	0
Fcgr3	0	1.10543	0.807	0.231	0
Aprt	0	1.10054	0.846	0.329	0
Mafb	0	1.09267	0.778	0.175	0
Ccl7	0	1.08339	0.551	0.147	0
Lipa	0	1.07448	0.77	0.217	0
Ccl9	0	1.06786	0.868	0.323	0
Ccl2	0	1.0422	0.656	0.221	0
Rnh1	0	0.995663	0.841	0.395	0
Ctsk	0	0.987696	0.37	0.023	0
Cyba	0	0.985178	0.978	0.727	0
Slc11a1	0	0.982238	0.732	0.153	0
Anxa1	0	0.978153	0.828	0.345	0
Cxcl2	0	0.975548	0.673	0.239	0
Emp1	0	0.966497	0.693	0.135	0
Metrnl	0	0.964835	0.869	0.334	0
Anxa5	0	0.962304	0.932	0.489	0
Blvrb	0	0.953272	0.77	0.231	0
Cdkn1a	0	0.951543	0.846	0.379	0
Pld3	0	0.949848	0.697	0.139	0
Adgre1	0	0.943799	0.695	0.166	0
Cd300c2	0	0.943469	0.842	0.294	0
Atp6v0d2	0	0.942791	0.351	0.014	0
Clec4d	0	0.934356	0.717	0.164	0
Sdcbp	0	0.932567	0.933	0.498	0
Dhrs3	0	0.93109	0.721	0.147	0
Ms4a6d	0	0.928787	0.778	0.185	0
Tmem106a	0	0.928022	0.768	0.192	0
Ctsa	0	0.922824	0.854	0.341	0
Vat1	0	0.920738	0.596	0.097	0
Pf4	0	0.918158	0.653	0.188	0
Cndp2	0	0.917627	0.783	0.224	0
Atp6v1c1	0	0.912004	0.692	0.201	0
Psmb6	0	0.908597	0.887	0.473	0
Bri3	0	0.90312	0.923	0.486	0
Atp6v1a	0	0.890114	0.716	0.19	0
Bax	0	0.889756	0.894	0.461	0
Npc2	0	0.887608	0.966	0.626	0
Pla2g7	0	0.878495	0.662	0.153	0
Serpinb6a	0	0.877322	0.515	0.112	0
Anxa4	0	0.874543	0.714	0.176	0
Rps27l	0	0.868177	0.929	0.526	0
Cd36	0	0.863375	0.753	0.237	0
Ccl6	0	0.861722	0.856	0.378	0
Cd93	0	0.861607	0.665	0.111	0
Basp1	0	0.844073	0.737	0.228	0
Plk2	0	0.837527	0.575	0.166	0
Hmox1	0	0.837334	0.679	0.182	0
C5ar1	0	0.835733	0.729	0.173	0
Lgals3bp	0	0.834385	0.719	0.231	0
Vim	0	0.826586	0.95	0.576	0
Esd	0	0.81697	0.802	0.395	0
Aif1	0	0.811005	0.806	0.337	0
Ftl1-ps1	0	0.808409	0.737	0.221	0
Cfp	0	0.804047	0.695	0.287	0
Gabarap	0	0.800654	0.941	0.632	0
Fcer1g	0	0.799081	0.976	0.563	0
Lrp1	0	0.797379	0.654	0.139	0
Uap1l1	0	0.794365	0.62	0.153	0
Tnfsf12	0	0.789714	0.575	0.093	0
Lmna	0	0.789177	0.677	0.203	0
Wfdc17	0	0.788901	0.853	0.388	0
Pltp	0	0.78383	0.578	0.19	0
Fcgr1	0	0.782215	0.724	0.182	0
Atp6v1g1	0	0.781917	0.909	0.533	0
Mpeg1	0	0.745611	0.854	0.374	0
Atp6v0b	0	0.741658	0.904	0.512	0
Gusb	0	0.738879	0.739	0.272	0
Fcgr4	0	0.732757	0.56	0.108	0
Lat2	0	0.730727	0.745	0.301	0
Abhd12	0	0.727582	0.7	0.214	0
Ap3s1	0	0.718585	0.706	0.245	0
Atp6v1b2	0	0.71437	0.721	0.245	0
Sirpa	0	0.711583	0.765	0.251	0
Por	0	0.708824	0.54	0.126	0
Il10rb	0	0.702455	0.746	0.265	0
Card19	0	0.698183	0.765	0.302	0
Adam8	0	0.696303	0.553	0.155	0
Mpp1	0	0.695076	0.672	0.184	0
Gstm1	0	0.68984	0.485	0.102	0
Cotl1	0	0.689457	0.901	0.567	0
Pgam1	0	0.684503	0.74	0.332	0
Gpx1	0	0.683218	0.947	0.629	0
Ahnak2	0	0.677469	0.363	0.026	0
Eif4e	0	0.675271	0.671	0.274	0
P2rx4	0	0.674858	0.698	0.232	0
Arl11	0	0.672334	0.488	0.071	0
Rab7b	0	0.667692	0.731	0.242	0
Nceh1	0	0.667674	0.54	0.102	0
Cd84	0	0.66552	0.697	0.188	0
Tpp1	0	0.659628	0.599	0.129	0
Rtp4	0	0.659388	0.688	0.219	0
Clta	0	0.658615	0.936	0.65	0
Lamp2	0	0.655359	0.786	0.334	0
Ap2m1	0	0.653545	0.753	0.337	0
Bst2	0	0.649562	0.899	0.464	0
Txndc17	0	0.649087	0.846	0.416	0
Aldoa	0	0.646653	0.833	0.477	0
Tpi1	0	0.646536	0.734	0.299	0
Lilr4b	0	0.643953	0.783	0.271	0
Lst1	0	0.64121	0.85	0.368	0
Itgb5	0	0.640501	0.479	0.065	0
Emp3	0	0.638903	0.924	0.567	0
Blvra	0	0.63776	0.626	0.179	0
Ctsh	0	0.637249	0.898	0.51	0
Cd300a	0	0.636582	0.786	0.282	0
Ms4a6c	0	0.633129	0.833	0.38	0
Stab1	0	0.625553	0.477	0.087	0
Lhfpl2	0	0.625064	0.334	0.023	0
Dab2	0	0.623917	0.603	0.176	0
Folr2	0	0.621912	0.378	0.058	0
Soat1	0	0.618411	0.553	0.142	0
Hpgds	0	0.618377	0.479	0.088	0
Ifi207	0	0.609238	0.767	0.307	0
Camk1	0	0.609077	0.561	0.128	0
Atp6v0e	0	0.609038	0.917	0.588	0
Gng5	0	0.608365	0.946	0.669	0
Tmem86a	0	0.607884	0.461	0.07	0
Pkm	0	0.606978	0.868	0.511	0
Zeb2	0	0.605934	0.832	0.333	0
Tcirg1	0	0.602807	0.541	0.135	0
Rgl1	0	0.600763	0.508	0.116	0
Glmp	0	0.596803	0.666	0.241	0
Hacd4	0	0.594936	0.537	0.127	0
Cebpa	0	0.593464	0.485	0.119	0
Wwp1	0	0.583009	0.471	0.1	0
Rap2b	0	0.581362	0.587	0.153	0
Calm2	0	0.580045	0.917	0.622	0
Tmed10	0	0.570191	0.849	0.459	0
Lrrc25	0	0.569922	0.678	0.26	0
Gpx4	0	0.569779	0.872	0.536	0
Tmem256	0	0.568028	0.779	0.381	0
F7	0	0.566197	0.259	0.014	0
Il1rn	0	0.565136	0.394	0.092	0
Gpr137b	0	0.564615	0.499	0.156	0
Aldh2	0	0.563633	0.697	0.266	0
Apobec1	0	0.55942	0.595	0.172	0
Slc48a1	0	0.556489	0.513	0.153	0
Calr	0	0.554471	0.843	0.541	0
Renbp	0	0.553736	0.492	0.101	0
Dnmt3a	0	0.553685	0.433	0.115	0
Clec4a2	0	0.553223	0.618	0.223	0
Ecm1	0	0.551355	0.385	0.056	0
Pmp22	0	0.550385	0.43	0.077	0
Msr1	0	0.549488	0.501	0.104	0
B2m	0	0.548206	0.985	0.885	0
Slc27a1	0	0.546088	0.362	0.037	0
Mdm2	0	0.545191	0.519	0.181	0
Osbpl8	0	0.543608	0.545	0.174	0
Tmem37	0	0.54195	0.376	0.045	0
Ifitm3	0	0.540295	0.931	0.501	0
Lamtor4	0	0.53933	0.755	0.329	0
2610001J05Rik	0	0.539018	0.677	0.263	0
Fkbp2	0	0.538392	0.709	0.312	0
Phlda3	0	0.537419	0.314	0.037	0
Gla	0	0.535199	0.484	0.098	0
Nr1h3	0	0.533947	0.369	0.054	0
Snx3	0	0.530723	0.844	0.474	0
App	0	0.527564	0.701	0.272	0
Trappc2l	0	0.52682	0.687	0.276	0
Snx5	0	0.525304	0.825	0.451	0
Rnase4	0	0.52464	0.371	0.066	0
Slc37a2	0	0.521006	0.384	0.04	0
Cln8	0	0.518993	0.487	0.111	0
Lamtor5	0	0.518722	0.792	0.391	0
Ier3	0	0.517458	0.651	0.269	0
Vps29	0	0.51704	0.71	0.311	0
Rgs10	0	0.516097	0.829	0.413	0
Ybx1	0	0.51604	0.924	0.669	0
P2ry6	0	0.512597	0.513	0.15	0
Dynll1	0	0.51199	0.93	0.647	0
Amdhd2	0	0.51125	0.483	0.13	0
Rab1a	0	0.511221	0.726	0.313	0
Cmtm3	0	0.506815	0.54	0.173	0
Tyrobp	0	0.505	0.975	0.606	0
Fam129b	0	0.504626	0.386	0.083	0
Pycard	0	0.501267	0.8	0.417	0
Aldh3b1	0	0.500408	0.46	0.106	0
Atp5g1	0	0.499452	0.855	0.506	0
Hist1h2bc	0	0.498497	0.409	0.121	0
Capns1	0	0.49728	0.813	0.447	0
Clec12a	0	0.49694	0.657	0.311	0
Litaf	0	0.493941	0.756	0.357	0
Ndufb8	0	0.493521	0.801	0.43	0
Hexb	0	0.492498	0.669	0.332	0
Naa50	0	0.49161	0.592	0.229	0
Anxa2	0	0.491379	0.879	0.492	0
Tpd52	0	0.489378	0.801	0.38	0
Slc15a3	0	0.488	0.504	0.151	0
S100a10	0	0.48751	0.898	0.581	0
Hsbp1	0	0.485854	0.735	0.338	0
Ap2s1	0	0.485689	0.78	0.412	0
Coro1c	0	0.48395	0.558	0.188	0
Sdc3	0	0.482392	0.552	0.209	0
Ehd4	0	0.482176	0.674	0.306	0
Dnase1l1	0	0.47992	0.459	0.115	0
Vsir	0	0.479763	0.68	0.297	0
H2-D1	0	0.474728	0.973	0.866	0
Dpp7	0	0.474631	0.391	0.067	0
0610012G03Rik	0	0.473406	0.63	0.255	0
Tbcb	0	0.472531	0.712	0.332	0
Gde1	0	0.472364	0.392	0.098	0
Arpc1b	0	0.472078	0.948	0.707	0
Dtnbp1	0	0.471473	0.509	0.167	0
Reep5	0	0.470905	0.867	0.524	0
Gltp	0	0.470023	0.775	0.4	0
Fam213b	0	0.46959	0.377	0.072	0
Ndufa12	0	0.469122	0.694	0.312	0
Atp6v1e1	0	0.466735	0.699	0.308	0
Pid1	0	0.464684	0.649	0.298	0
S100a6	0	0.464025	0.909	0.527	0
Ap1s1	0	0.463082	0.484	0.132	0
Fam20c	0	0.462793	0.297	0.031	0
Rab5c	0	0.461715	0.712	0.329	0
Plekho1	0	0.461149	0.625	0.271	0
Mfsd12	0	0.46061	0.343	0.062	0
Ctsc	0	0.460399	0.783	0.433	0
Atp6ap1	0	0.457584	0.672	0.283	0
Comtd1	0	0.454887	0.369	0.065	0
Dbi	0	0.454161	0.862	0.487	0
Gng2	0	0.452335	0.674	0.292	0
Atp6v0d1	0	0.451112	0.684	0.306	0
Dynlrb1	0	0.45041	0.818	0.444	0
Arhgap10	0	0.449923	0.334	0.046	0
Mcfd2	0	0.448193	0.426	0.117	0
Ifi204	0	0.447153	0.669	0.248	0
Daglb	0	0.446209	0.431	0.106	0
Ahnak	0	0.444873	0.838	0.446	0
Rab3il1	0	0.443773	0.395	0.08	0
Mdfic	0	0.443479	0.437	0.117	0
Anpep	0	0.443369	0.323	0.071	0
Lair1	0	0.443292	0.461	0.124	0
Spcs1	0	0.442933	0.768	0.412	0
Ggh	0	0.442342	0.564	0.192	0
Ndufc1	0	0.441558	0.703	0.343	0
Smpdl3a	0	0.440797	0.635	0.262	0
2010111I01Rik	0	0.440683	0.399	0.086	0
Naa20	0	0.440587	0.534	0.18	0
Rhob	0	0.440461	0.546	0.193	0
Tubb2a	0	0.440044	0.61	0.235	0
Rnf128	0	0.43975	0.243	0.01	0
Gnpda1	0	0.43949	0.435	0.117	0
Uqcrb	0	0.439008	0.885	0.565	0
Myof	0	0.438246	0.382	0.077	0
Maf	0	0.43808	0.498	0.14	0
Calm1	0	0.434838	0.977	0.803	0
Irf7	0	0.434559	0.683	0.293	0
Asah1	0	0.434072	0.666	0.304	0
Mrpl42	0	0.43338	0.667	0.281	0
Vamp8	0	0.432849	0.884	0.534	0
Lamtor1	0	0.432719	0.7	0.345	0
Rab7	0	0.432377	0.774	0.414	0
Abcg1	0	0.430683	0.412	0.12	0
Bsg	0	0.429623	0.783	0.407	0
Tmem14c	0	0.429581	0.767	0.392	0
Commd1	0	0.42867	0.616	0.255	0
Dstn	0	0.426485	0.589	0.219	0
Rrbp1	0	0.426166	0.842	0.477	0
Rnf130	0	0.42602	0.693	0.32	0
Sem1	0	0.425782	0.953	0.703	0
Acp2	0	0.425562	0.372	0.075	0
Ndufab1	0	0.425101	0.698	0.332	0
Rbx1	0	0.424805	0.878	0.551	0
Commd3	0	0.423393	0.591	0.239	0
Calm3	0	0.423059	0.797	0.422	0
Acp5	0	0.422657	0.457	0.159	0
Tnfaip8l2	0	0.422445	0.535	0.226	0
Atp13a2	0	0.422146	0.413	0.09	0
Dok2	0	0.419251	0.542	0.174	0
Ptgr1	0	0.414558	0.28	0.038	0
Rab20	0	0.413698	0.399	0.101	0
Rhoc	0	0.413393	0.363	0.084	0
Gas6	0	0.413365	0.306	0.062	0
Vdac2	0	0.41143	0.772	0.416	0
Cd300lb	0	0.411268	0.355	0.06	0
Gns	0	0.41078	0.522	0.174	0
Pgd	0	0.410156	0.52	0.179	0
Lrpap1	0	0.409236	0.491	0.167	0
Idh1	0	0.408954	0.384	0.087	0
Glul	0	0.408751	0.537	0.209	0
Tmem120a	0	0.4061	0.35	0.074	0
Pdlim4	0	0.404246	0.351	0.06	0
Lgals9	0	0.402699	0.554	0.205	0
Cd14	0	0.402676	0.64	0.241	0
Mfsd1	0	0.401338	0.501	0.172	0
Capn2	0	0.40106	0.523	0.19	0
Hk3	0	0.400494	0.313	0.053	0
Rexo2	0	0.400114	0.671	0.315	0
Cuedc2	0	0.398833	0.562	0.218	0
Eif4ebp1	0	0.398663	0.571	0.217	0
Snapc5	0	0.397768	0.593	0.228	0
Cers2	0	0.397257	0.56	0.216	0
Ptafr	0	0.396301	0.489	0.168	0
Tspan4	0	0.39577	0.333	0.048	0
Clec4a1	0	0.395676	0.546	0.224	0
Coa3	0	0.395495	0.646	0.273	0
Rin2	0	0.394558	0.343	0.079	0
Rnpep	0	0.394452	0.51	0.189	0
Myo1f	0	0.394075	0.581	0.232	0
Atf3	0	0.394014	0.812	0.433	0
Pdxk	0	0.39357	0.378	0.106	0
Nagk	0	0.393374	0.392	0.104	0
Ndufs5	0	0.393319	0.729	0.372	0
Cyfip1	0	0.393044	0.547	0.209	0
Tmem65	0	0.392278	0.328	0.057	0
Slc6a6	0	0.391673	0.68	0.296	0
Hmox2	0	0.389049	0.596	0.253	0
Timm13	0	0.388824	0.763	0.4	0
Pirb	0	0.388762	0.604	0.256	0
Adap2	0	0.387594	0.33	0.076	0
Nrp1	0	0.38717	0.492	0.156	0
Clec4a3	0	0.386948	0.621	0.25	0
Marcks	0	0.386872	0.791	0.41	0
Npc1	0	0.386618	0.355	0.082	0
Slc29a3	0	0.385952	0.385	0.111	0
Nrros	0	0.385609	0.681	0.316	0
Slamf7	0	0.384991	0.577	0.254	0
Gngt2	0	0.384165	0.742	0.296	0
Gm34084	0	0.382608	0.413	0.141	0
Hpcal1	0	0.380702	0.632	0.288	0
Slc6a8	0	0.380673	0.228	0.012	0
Actn4	0	0.379244	0.495	0.185	0
Myo5a	0	0.37504	0.43	0.13	0
Fyb	0	0.374068	0.775	0.381	0
Stx4a	0	0.372941	0.564	0.222	0
Gdpd1	0	0.372909	0.241	0.012	0
Sgpl1	0	0.372503	0.469	0.155	0
Oasl2	0	0.37037	0.448	0.152	0
Tmem205	0	0.369802	0.357	0.073	0
Lamtor3	0	0.367526	0.536	0.218	0
Dmac1	0	0.366482	0.589	0.259	0
Itgam	0	0.366224	0.504	0.18	0
Mrpl17	0	0.364059	0.545	0.227	0
Hcfc1r1	0	0.363659	0.576	0.235	0
Atp6v1d	0	0.363583	0.626	0.282	0
Dnase2a	0	0.362409	0.473	0.155	0
Mtss1	0	0.36107	0.54	0.17	0
Dnajc15	0	0.361015	0.724	0.36	0
Rsu1	0	0.359157	0.588	0.253	0
Mfsd11	0	0.359074	0.333	0.071	0
Prdx4	0	0.359041	0.484	0.18	0
Scpep1	0	0.35874	0.476	0.177	0
Tnfaip2	0	0.358677	0.399	0.094	0
Mydgf	0	0.358213	0.583	0.257	0
Vwa5a	0	0.358033	0.385	0.108	0
Ccrl2	0	0.35747	0.425	0.146	0
Ech1	0	0.357464	0.606	0.254	0
Rcbtb2	0	0.356752	0.375	0.108	0
Abca1	0	0.355579	0.316	0.056	0
Asph	0	0.355434	0.363	0.12	0
1500011K16Rik	0	0.354668	0.438	0.15	0
Ccr5	0	0.354443	0.457	0.164	0
Dcxr	0	0.353538	0.373	0.107	0
Alox5ap	0	0.353147	0.906	0.481	0
Ccng1	0	0.352848	0.427	0.142	0
Mrps18a	0	0.352074	0.509	0.192	0
Mien1	0	0.351726	0.682	0.332	0
Cd200r1	0	0.351134	0.321	0.068	0
Vps35	0	0.350921	0.55	0.24	0
Slc16a10	0	0.34999	0.316	0.077	0
Cnpy2	0	0.349638	0.527	0.201	0
Arl8b	0	0.348889	0.444	0.165	0
Cd302	0	0.348522	0.458	0.153	0
Frmd4b	0	0.348463	0.336	0.095	0
Pla2g15	0	0.348234	0.282	0.05	0
Emc7	0	0.347416	0.623	0.285	0
Frrs1	0	0.34741	0.318	0.068	0
Psen2	0	0.34729	0.389	0.112	0
Ly9	0	0.346943	0.456	0.141	0
Lpxn	0	0.346788	0.488	0.181	0
Hebp1	0	0.346698	0.237	0.037	0
S100a1	0	0.34633	0.429	0.148	0
Spsb2	0	0.345583	0.304	0.061	0
Atp6v0a1	0	0.345237	0.306	0.063	0
Sirt2	0	0.344414	0.499	0.188	0
BC031181	0	0.344061	0.645	0.292	0
Adssl1	0	0.343269	0.444	0.146	0
Rex1bd	0	0.343172	0.584	0.262	0
Aph1c	0	0.340893	0.299	0.083	0
Asna1	0	0.340882	0.457	0.167	0
Gm21188	0	0.340697	0.369	0.121	0
Igsf6	0	0.339024	0.471	0.155	0
Pfdn1	0	0.338328	0.539	0.219	0
Slc43a2	0	0.3379	0.364	0.102	0
Bcl2l1	0	0.336658	0.307	0.078	0
2310022A10Rik	0	0.336169	0.338	0.091	0
Tgm2	0	0.335217	0.33	0.082	0
Gng12	0	0.335212	0.478	0.18	0
Mcee	0	0.334723	0.371	0.102	0
Sash1	0	0.333459	0.273	0.056	0
Ugp2	0	0.332171	0.46	0.167	0
Ethe1	0	0.330059	0.406	0.127	0
Ly96	0	0.328636	0.383	0.11	0
Anxa3	0	0.328515	0.434	0.108	0
Znhit1	0	0.326082	0.496	0.194	0
Csf1r	0	0.324439	0.665	0.245	0
Emc4	0	0.324309	0.5	0.193	0
Aga	0	0.323747	0.326	0.075	0
Mrpl27	0	0.32368	0.432	0.155	0
Fgd4	0	0.323603	0.283	0.061	0
Arl8a	0	0.323542	0.411	0.14	0
Plin3	0	0.32292	0.372	0.114	0
Stard3	0	0.322854	0.433	0.162	0
Acot13	0	0.322683	0.387	0.117	0
Snx27	0	0.322078	0.292	0.071	0
Plxnb2	0	0.320887	0.368	0.118	0
Tmem189	0	0.320515	0.416	0.151	0
Mocs2	0	0.319942	0.395	0.112	0
Rtf2	0	0.317975	0.559	0.24	0
Tmem126a	0	0.312825	0.448	0.168	0
Dap	0	0.309715	0.522	0.216	0
Plxna1	0	0.308534	0.212	0.027	0
Ermard	0	0.307931	0.213	0.024	0
Fblim1	0	0.307691	0.218	0.017	0
Ang	0	0.306856	0.216	0.029	0
Lxn	0	0.303655	0.306	0.073	0
Pparg	0	0.301116	0.315	0.083	0
Tceal8	0	0.300935	0.315	0.078	0
Slc35f6	0	0.299641	0.288	0.069	0
Tex264	0	0.2977	0.36	0.094	0
Ubtd1	0	0.296454	0.291	0.066	0
Guca1a	0	0.29518	0.298	0.08	0
Mitf	0	0.293284	0.224	0.033	0
Tbxas1	0	0.292472	0.329	0.096	0
Srxn1	0	0.292258	0.202	0.032	0
Cln3	0	0.290789	0.328	0.099	0
Blnk	0	0.290135	0.434	0.123	0
Cd300ld	0	0.287397	0.426	0.136	0
Tlr13	0	0.287289	0.271	0.059	0
Wls	0	0.286018	0.329	0.087	0
Sdhaf4	0	0.285015	0.393	0.127	0
Nt5dc2	0	0.283261	0.228	0.04	0
Slc7a8	0	0.280266	0.237	0.048	0
Nrp2	0	0.274311	0.274	0.064	0
Tom1	0	0.270082	0.263	0.055	0
Cxcl16	0	0.270036	0.561	0.233	0
Coa4	0	0.267069	0.259	0.057	0
Snx8	0	0.266284	0.323	0.089	0
B430306N03Rik	0	0.263618	0.212	0.039	0
Gna12	0	0.263196	0.257	0.055	0
Tcn2	0	0.262775	0.324	0.089	0
Ntpcr	0	0.257978	0.291	0.08	0
Rit1	0	0.255682	0.346	0.108	0
Paox	0	0.25565	0.201	0.031	0
Neu1	0	0.25366	0.437	0.148	0
Gaa	0	0.252512	0.246	0.059	0
Plod1	0	0.252257	0.25	0.047	0
Igf2r	0	0.250818	0.217	0.042	0
Glb1	0	0.250262	0.27	0.066	0
Trim47	0	0.25017	0.223	0.039	0
Clcn7	0	0.249164	0.212	0.039	0
Mrc1	0	0.247431	0.442	0.139	0
Naglu	0	0.244342	0.224	0.044	0
Mgst1	0	0.237114	0.393	0.114	0
Tmem140	0	0.233741	0.225	0.046	0
Ldlrap1	0	0.227024	0.222	0.047	0
Cerk	0	0.214139	0.355	0.111	0
Entpd1	0	0.213798	0.294	0.081	0
Cebpb	0	0.207557	0.838	0.421	0
Htatip2	9.85879e-308	0.257401	0.346	0.11	1.68447e-303
Cenpb	2.12723e-307	0.293739	0.362	0.12	3.63458e-303
Pon2	4.21337e-307	0.282043	0.451	0.171	7.19896e-303
Vps26a	8.73018e-307	0.299274	0.47	0.184	1.49164e-302
Tubb6	2.04919e-306	0.405368	0.521	0.225	3.50124e-302
Pira2	5.32599e-306	0.287665	0.307	0.091	9.09998e-302
Plbd2	2.01875e-305	0.278018	0.338	0.107	3.44923e-301
Hip1	8.97122e-305	0.270767	0.328	0.1	1.53282e-300
Fundc2	1.20795e-304	0.267795	0.533	0.223	2.06391e-300
Itgb2	5.05396e-304	0.351632	0.749	0.394	8.6352e-300
Rtn4	1.38395e-303	0.389011	0.796	0.45	2.36461e-299
Tceal9	1.63082e-303	0.303707	0.534	0.223	2.78643e-299
Vmp1	4.63176e-303	0.300626	0.485	0.194	7.91383e-299
Selenof	6.37768e-303	0.400078	0.812	0.487	1.08969e-298
Bag1	1.01115e-301	0.355966	0.688	0.347	1.72766e-297
Snx6	1.95383e-301	0.318334	0.513	0.215	3.33831e-297
Polr2f	4.69301e-301	0.339766	0.619	0.29	8.01847e-297
Tmem208	9.79091e-301	0.291996	0.535	0.229	1.67287e-296
Cyb5a	3.18675e-300	0.391679	0.697	0.354	5.44488e-296
Thyn1	6.90999e-300	0.279485	0.342	0.112	1.18064e-295
Sdhb	9.77328e-300	0.361774	0.742	0.395	1.66986e-295
Slc7a7	1.96566e-299	0.241751	0.238	0.058	3.35853e-295
Slc3a2	4.42785e-299	0.391809	0.792	0.434	7.56543e-295
Pdia6	7.92959e-299	0.38742	0.731	0.379	1.35485e-294
AI413582	7.16839e-298	0.322638	0.53	0.227	1.22479e-293
Fam234a	9.8387e-298	0.228668	0.247	0.061	1.68104e-293
Nfic	1.9316e-296	0.287627	0.325	0.101	3.30033e-292
Rnf7	3.66819e-296	0.301213	0.66	0.318	6.26747e-292
Xdh	7.36433e-296	0.229021	0.292	0.082	1.25827e-291
Rab11a	1.16718e-295	0.333373	0.674	0.334	1.99425e-291
Etfb	1.99064e-295	0.347075	0.66	0.322	3.40121e-291
Fez2	2.31188e-295	0.225979	0.295	0.084	3.95008e-291
Timm17a	2.4523e-295	0.304339	0.528	0.227	4.18999e-291
Tmbim4	6.56247e-295	0.28756	0.608	0.28	1.12126e-290
Slc9a3r1	1.3125e-294	0.272055	0.507	0.209	2.24253e-290
Grina	1.37491e-293	0.202138	0.454	0.175	2.34916e-289
Rragc	1.60428e-293	0.292928	0.433	0.167	2.74108e-289
Sqstm1	2.21039e-293	0.403316	0.679	0.336	3.77666e-289
Crlf2	3.31386e-293	0.319417	0.637	0.307	5.66205e-289
Sh3bgrl	4.20491e-291	0.352194	0.681	0.342	7.18451e-287
Arrb2	9.6598e-291	0.323309	0.479	0.196	1.65047e-286
Ten1	7.78151e-290	0.273652	0.466	0.186	1.32955e-285
Rbm47	2.22922e-289	0.318536	0.32	0.101	3.80885e-285
Cd9	3.12239e-289	0.62914	0.607	0.313	5.33491e-285
Triap1	3.71957e-289	0.253196	0.381	0.134	6.35526e-285
Mcub	3.81695e-289	0.304112	0.55	0.238	6.52164e-285
Elob	5.90126e-289	0.415254	0.903	0.61	1.00829e-284
Zfand2a	1.82414e-287	0.26972	0.233	0.058	3.11672e-283
Uqcr11	2.01092e-287	0.381558	0.796	0.456	3.43585e-283
Jun	2.36807e-286	0.335206	0.854	0.492	4.04609e-282
Sh3bgrl3	5.98666e-286	0.377529	0.966	0.802	1.02288e-281
Il7r	1.22793e-285	0.33133	0.396	0.142	2.09804e-281
Ifi27l2a	1.0208e-284	0.600609	0.806	0.525	1.74414e-280
Dusp1	1.52842e-284	0.506223	0.852	0.545	2.61145e-280
Vdac1	1.57752e-284	0.312687	0.531	0.233	2.69536e-280
Lamtor2	1.92906e-284	0.352492	0.749	0.409	3.29599e-280
Txn1	2.10322e-284	0.38115	0.893	0.579	3.59356e-280
Gba	2.21081e-284	0.263713	0.299	0.091	3.77739e-280
Prdx5	8.36517e-284	0.201124	0.83	0.478	1.42927e-279
Milr1	9.35602e-284	0.287517	0.395	0.143	1.59857e-279
Spg21	3.04387e-283	0.334643	0.623	0.302	5.20075e-279
Fuca2	5.5989e-283	0.296749	0.411	0.156	9.56629e-279
Spi1	2.20033e-282	0.326397	0.862	0.472	3.75948e-278
Il11ra1	2.67721e-282	0.217619	0.228	0.056	4.57429e-278
Pebp1	5.63984e-282	0.323555	0.693	0.353	9.63623e-278
Ifngr2	7.42452e-282	0.299648	0.548	0.243	1.26855e-277
Fos	5.26672e-281	0.397438	0.915	0.638	8.99872e-277
Rab14	1.71614e-280	0.321782	0.737	0.394	2.9322e-276
Adam15	3.73086e-280	0.248619	0.324	0.104	6.37455e-276
Ube2l3	1.18613e-279	0.359141	0.774	0.424	2.02662e-275
Cpeb4	1.23182e-279	0.303182	0.265	0.074	2.10469e-275
Gas2l3	4.47584e-279	0.286148	0.22	0.053	7.64742e-275
Tnf	7.66749e-279	0.287163	0.446	0.173	1.31007e-274
Mlf2	1.37673e-278	0.299308	0.574	0.264	2.35228e-274
Stx8	4.68348e-278	0.268351	0.438	0.173	8.0022e-274
BC005537	7.15908e-277	0.337338	0.725	0.377	1.2232e-272
Sh3glb1	3.78268e-276	0.37492	0.836	0.518	6.46309e-272
Dusp3	4.66385e-276	0.270278	0.454	0.182	7.96865e-272
Mrps14	5.85074e-275	0.339317	0.727	0.384	9.99658e-271
Nras	8.08134e-275	0.24743	0.447	0.178	1.38078e-270
Oxct1	1.6002e-274	0.298947	0.438	0.176	2.7341e-270
Itsn1	2.86533e-274	0.21503	0.209	0.048	4.8957e-270
Ppp1r14b	3.09337e-274	0.303122	0.442	0.178	5.28533e-270
Nenf	3.74999e-274	0.288621	0.467	0.194	6.40724e-270
Eea1	5.54733e-273	0.290909	0.368	0.132	9.47817e-269
Efhd2	7.67934e-273	0.34498	0.84	0.466	1.31209e-268
Dse	2.40953e-272	0.256828	0.297	0.091	4.11692e-268
1110008F13Rik	3.38398e-272	0.316283	0.747	0.401	5.78187e-268
Rnf13	3.58616e-272	0.237388	0.449	0.178	6.12731e-268
Ube2a	2.49258e-271	0.295707	0.625	0.303	4.25883e-267
Nat9	3.68272e-271	0.216984	0.23	0.059	6.29229e-267
Ndufs7	1.25717e-270	0.307961	0.683	0.353	2.148e-266
Psmd8	3.2599e-270	0.383293	0.751	0.416	5.56987e-266
Tmem141	1.49153e-268	0.237783	0.258	0.073	2.54843e-264
Trappc1	3.85195e-268	0.275376	0.534	0.239	6.58144e-264
Ssu72	7.00396e-268	0.305135	0.706	0.368	1.1967e-263
Tspan31	2.44614e-267	0.267226	0.4	0.152	4.17947e-263
1810058I24Rik	2.67512e-265	0.315135	0.664	0.345	4.5707e-261
Sdhc	4.78386e-265	0.285629	0.482	0.206	8.1737e-261
Chmp2a	5.87853e-265	0.358245	0.773	0.431	1.00441e-260
Atp6ap2	8.09276e-265	0.311992	0.606	0.293	1.38273e-260
Cmpk1	9.41196e-265	0.344587	0.735	0.398	1.60813e-260
Mrpl51	1.62951e-264	0.292074	0.512	0.226	2.78417e-260
2210016F16Rik	3.25166e-264	0.289229	0.441	0.18	5.55578e-260
Commd6	1.48011e-263	0.270927	0.513	0.225	2.52891e-259
Ndufa8	1.64912e-263	0.287777	0.686	0.352	2.81768e-259
Bad	5.46135e-263	0.241506	0.354	0.126	9.33127e-259
Pnkd	8.66274e-261	0.228772	0.39	0.147	1.48012e-256
Cox5a	1.49275e-260	0.396783	0.877	0.574	2.55052e-256
Pqlc3	1.81176e-260	0.240748	0.298	0.096	3.09558e-256
Unc93b1	1.27075e-259	0.373338	0.791	0.456	2.1712e-255
Tmem165	7.25573e-259	0.275517	0.398	0.155	1.23971e-254
Vapb	1.01961e-258	0.257798	0.441	0.182	1.7421e-254
Acads	1.18876e-258	0.215495	0.282	0.087	2.03112e-254
Scarb2	4.95135e-258	0.264965	0.468	0.198	8.45987e-254
Acaa2	1.73132e-257	0.228304	0.396	0.15	2.95813e-253
Timm8b	2.86271e-257	0.301361	0.525	0.241	4.89122e-253
Bst1	5.7913e-257	0.2149	0.254	0.073	9.89502e-253
Cops6	5.86221e-257	0.261734	0.533	0.241	1.00162e-252
Mrps18c	5.93461e-257	0.309347	0.59	0.285	1.01399e-252
Cyp4f18	2.18873e-256	0.223826	0.423	0.163	3.73967e-252
Lyz1	3.03822e-256	0.593292	0.234	0.064	5.19111e-252
Med8	3.20903e-256	0.248359	0.419	0.169	5.48294e-252
Ndufc2	1.35049e-255	0.334334	0.792	0.45	2.30745e-251
Nisch	2.76261e-255	0.222548	0.463	0.19	4.72019e-251
Kcnn4	5.32049e-255	0.316151	0.341	0.124	9.09059e-251
Rps19bp1	3.3866e-254	0.268444	0.341	0.122	5.78634e-250
Psmb5	2.03449e-253	0.362491	0.756	0.429	3.47613e-249
Echs1	2.24777e-253	0.251028	0.382	0.146	3.84054e-249
Pdcd5	2.47469e-253	0.296185	0.69	0.36	4.22825e-249
Sptlc2	2.85285e-253	0.23432	0.401	0.156	4.87438e-249
Alas1	5.39094e-253	0.264678	0.268	0.081	9.21097e-249
Napa	1.67105e-252	0.275539	0.513	0.232	2.85515e-248
Sod2	4.95709e-252	0.290426	0.601	0.288	8.46968e-248
Idh2	5.13519e-252	0.2508	0.357	0.131	8.77399e-248
Atp6v1f	7.43927e-252	0.35667	0.869	0.572	1.27107e-247
Ndufb6	1.1297e-251	0.325455	0.673	0.353	1.93021e-247
Edf1	2.56782e-251	0.341006	0.849	0.509	4.38738e-247
St13	3.01947e-251	0.27493	0.568	0.267	5.15906e-247
Uqcc2	4.6452e-251	0.320526	0.6	0.293	7.93679e-247
Igsf8	1.70837e-250	0.262851	0.292	0.095	2.91892e-246
Ppt2	1.89899e-250	0.230392	0.313	0.106	3.24461e-246
Ak6	3.2807e-250	0.285381	0.348	0.129	5.6054e-246
Cttnbp2nl	6.12697e-250	0.256434	0.266	0.081	1.04685e-245
St6galnac4	3.28116e-249	0.246412	0.273	0.085	5.60618e-245
Ostf1	7.15784e-249	0.337823	0.866	0.561	1.22299e-244
Pnp	7.79106e-249	0.280391	0.637	0.315	1.33118e-244
Tmbim1	6.23687e-248	0.247986	0.285	0.09	1.06563e-243
Atp6v1h	2.4294e-247	0.281954	0.395	0.156	4.15088e-243
Rufy3	3.31078e-247	0.237148	0.253	0.074	5.6568e-243
Naxe	3.01752e-246	0.245902	0.427	0.176	5.15573e-242
Cltc	1.19244e-245	0.24109	0.617	0.304	2.0374e-241
Mtch2	1.61277e-245	0.265948	0.54	0.251	2.75559e-241
Cenpx	2.49137e-245	0.267322	0.59	0.282	4.25676e-241
Gadd45b	3.46789e-245	0.338436	0.747	0.402	5.92524e-241
Sat1	3.62859e-245	0.261511	0.903	0.597	6.1998e-241
Fnip2	7.15471e-245	0.251078	0.205	0.052	1.22245e-240
Mif	1.01994e-244	0.346223	0.732	0.405	1.74266e-240
Pdia3	1.05273e-244	0.342711	0.813	0.483	1.79869e-240
Lgals8	3.35259e-244	0.212325	0.281	0.088	5.72823e-240
0610009B22Rik	1.22365e-243	0.217821	0.246	0.072	2.09072e-239
Atpif1	5.94103e-243	0.313237	0.851	0.489	1.01508e-238
Sdf2l1	6.21026e-243	0.28396	0.627	0.315	1.06109e-238
Ergic3	7.81054e-243	0.226869	0.519	0.234	1.33451e-238
Aup1	9.32868e-243	0.249627	0.535	0.247	1.5939e-238
Faim	1.37739e-242	0.220688	0.445	0.187	2.35341e-238
Chmp5	7.24572e-242	0.255895	0.551	0.258	1.238e-237
Dctn3	1.54977e-241	0.265879	0.683	0.356	2.64795e-237
Ckap4	1.09153e-240	0.221575	0.246	0.072	1.86499e-236
Mapk3	2.10822e-240	0.223167	0.439	0.183	3.6021e-236
Zeb2os	8.17343e-240	0.244157	0.356	0.131	1.39651e-235
Mrps25	1.49326e-239	0.236535	0.39	0.155	2.55138e-235
Hilpda	2.06142e-239	0.436021	0.312	0.111	3.52214e-235
Nfe2l2	3.29442e-239	0.246879	0.614	0.298	5.62885e-235
Lacc1	5.3636e-239	0.258954	0.286	0.094	9.16425e-235
Psmc2	1.93201e-238	0.278486	0.522	0.243	3.30104e-234
Txndc9	2.1128e-238	0.251958	0.505	0.23	3.60994e-234
Nucb1	6.95061e-238	0.217631	0.406	0.163	1.18758e-233
Mrps36	1.32986e-237	0.243968	0.483	0.216	2.2722e-233
Tmem9b	6.73227e-237	0.227407	0.463	0.201	1.15028e-232
Bscl2	9.52376e-237	0.231968	0.42	0.172	1.62723e-232
Snrnp27	1.11458e-236	0.245357	0.471	0.208	1.90436e-232
Ndufb9	1.20727e-236	0.310389	0.775	0.448	2.06274e-232
Fkbp1a	1.79999e-236	0.28071	0.704	0.381	3.07547e-232
Ifit3	3.39688e-236	0.321064	0.335	0.123	5.80391e-232
Dnajc19	7.57444e-236	0.266088	0.575	0.282	1.29417e-231
Vapa	9.78635e-236	0.294507	0.713	0.393	1.6721e-231
Sar1b	7.01281e-235	0.225074	0.484	0.217	1.19821e-230
Bcap31	9.35326e-235	0.272624	0.627	0.322	1.5981e-230
Slirp	6.28742e-234	0.310681	0.585	0.293	1.07427e-229
Taf6l	7.23581e-234	0.233456	0.596	0.292	1.23631e-229
Zfand5	3.82334e-233	0.313777	0.799	0.465	6.53257e-229
Degs1	3.24458e-232	0.264937	0.544	0.26	5.5437e-228
Mrpl35	7.15122e-232	0.239569	0.405	0.167	1.22186e-227
Mrpl54	1.59729e-231	0.306846	0.629	0.323	2.72913e-227
Tnfrsf11a	3.584e-231	0.206829	0.216	0.059	6.12362e-227
Nme1	4.22669e-231	0.301872	0.764	0.438	7.22171e-227
Dync1i2	6.60142e-231	0.214668	0.43	0.18	1.12792e-226
Mrps33	8.98737e-231	0.268778	0.674	0.355	1.53558e-226
Map2k2	6.65512e-230	0.240701	0.624	0.317	1.13709e-225
Ralb	6.80159e-230	0.242951	0.406	0.168	1.16212e-225
Mrpl28	6.88863e-230	0.235449	0.486	0.217	1.17699e-225
B4galt6	1.88241e-229	0.231972	0.248	0.075	3.21628e-225
Fcgr2b	1.9853e-229	0.308854	0.564	0.276	3.39208e-225
Vti1b	1.2516e-228	0.230368	0.492	0.224	2.13849e-224
Laptm5	1.31506e-228	0.367074	0.923	0.656	2.24691e-224
Stom	1.32713e-228	0.222223	0.315	0.112	2.26753e-224
Tmem160	2.89422e-227	0.300957	0.724	0.407	4.94506e-223
Raph1	4.41394e-227	0.262933	0.268	0.088	7.54166e-223
Eif4a1	8.4434e-227	0.425292	0.9	0.65	1.44264e-222
Cox6b1	1.53805e-226	0.34283	0.913	0.645	2.62791e-222
Bola2	2.13296e-226	0.280675	0.608	0.309	3.64438e-222
Elovl1	3.59296e-226	0.216503	0.422	0.178	6.13894e-222
Ccl12	3.59983e-225	0.331973	0.282	0.095	6.15067e-221
Evi2a	5.16788e-225	0.271598	0.697	0.371	8.82984e-221
Chmp4b	1.79071e-224	0.30335	0.789	0.454	3.05961e-220
Glrx3	1.8424e-224	0.257704	0.605	0.302	3.14793e-220
Mrpl23	8.34446e-224	0.240731	0.668	0.348	1.42573e-219
Tns3	5.39235e-223	0.275628	0.297	0.105	9.21337e-219
Vamp4	1.45042e-222	0.227203	0.39	0.16	2.47819e-218
Fuca1	3.59449e-222	0.244864	0.61	0.311	6.14155e-218
Dok1	4.10541e-222	0.20612	0.364	0.143	7.0145e-218
Dram2	9.24877e-222	0.211291	0.337	0.125	1.58024e-217
Pi4k2a	9.59286e-222	0.271008	0.31	0.114	1.63904e-217
Uqcrq	1.20675e-221	0.323958	0.826	0.499	2.06185e-217
Ndufa5	1.97711e-221	0.222277	0.552	0.266	3.37809e-217
Metap2	5.68127e-221	0.248735	0.596	0.3	9.70703e-217
Srp14	2.39378e-220	0.279603	0.805	0.496	4.09001e-216
Cdc42	3.80161e-220	0.324475	0.927	0.696	6.49542e-216
Krcc1	4.92698e-220	0.254861	0.579	0.288	8.41824e-216
Ldha	7.32638e-220	0.354101	0.84	0.518	1.25179e-215
Bbip1	1.10204e-219	0.233784	0.468	0.211	1.88295e-215
Oas1a	6.29436e-219	0.223322	0.258	0.083	1.07545e-214
Yif1b	7.67303e-219	0.230213	0.432	0.189	1.31101e-214
Cd48	2.09341e-218	0.29299	0.763	0.432	3.5768e-214
Mpdu1	2.80719e-218	0.229095	0.387	0.159	4.79636e-214
Prdx2	3.2826e-218	0.279963	0.742	0.425	5.60865e-214
Pfn1	1.78984e-217	0.304652	0.969	0.827	3.05811e-213
Mrpl36	3.88603e-217	0.236333	0.493	0.23	6.63968e-213
Aurkaip1	4.02228e-217	0.266703	0.664	0.356	6.87246e-213
Nkiras2	4.42735e-217	0.221774	0.279	0.096	7.56457e-213
Derl2	7.68171e-217	0.20775	0.437	0.192	1.3125e-212
Sap30	9.73812e-217	0.226441	0.507	0.235	1.66386e-212
Mrpl20	1.26058e-216	0.263421	0.621	0.327	2.15382e-212
Ywhab	2.59401e-216	0.264895	0.699	0.384	4.43212e-212
Hsd17b12	6.01096e-216	0.232545	0.461	0.208	1.02703e-211
Elof1	8.2848e-216	0.212947	0.434	0.19	1.41554e-211
Ndufs3	5.16355e-215	0.211536	0.556	0.272	8.82245e-211
Rasgef1b	3.01655e-214	0.260661	0.403	0.169	5.15407e-210
Lrrc59	5.5508e-214	0.246544	0.39	0.165	9.4841e-210
Leprot	7.99948e-214	0.237297	0.43	0.189	1.36679e-209
Lasp1	1.54339e-212	0.251279	0.417	0.181	2.63704e-208
P4hb	1.7433e-212	0.25451	0.582	0.295	2.9786e-208
Casp1	3.88778e-212	0.210821	0.37	0.149	6.64266e-208
Cfl1	5.31461e-212	0.321502	0.962	0.785	9.08055e-208
Ywhag	5.35402e-212	0.256852	0.445	0.201	9.14788e-208
Rpn1	1.13036e-211	0.25135	0.458	0.208	1.93133e-207
Canx	6.21503e-211	0.28831	0.703	0.392	1.0619e-206
Ube2m	4.69227e-210	0.249325	0.385	0.164	8.01722e-206
Ubl4a	6.77027e-210	0.23894	0.388	0.165	1.15677e-205
Med28	3.50032e-209	0.242996	0.675	0.365	5.98065e-205
Smdt1	1.52359e-208	0.302314	0.858	0.52	2.6032e-204
Gas7	1.98367e-208	0.217181	0.28	0.098	3.3893e-204
Sra1	8.45346e-208	0.225973	0.541	0.266	1.44436e-203
Pepd	1.05872e-207	0.252283	0.443	0.201	1.80893e-203
Rab8b	1.66382e-207	0.226525	0.426	0.188	2.8428e-203
Tmed3	2.09197e-207	0.213935	0.529	0.256	3.57433e-203
Ptpra	8.38535e-207	0.220041	0.445	0.201	1.43272e-202
Pitpna	1.35384e-205	0.263597	0.754	0.421	2.31318e-201
P4ha1	1.76223e-205	0.207704	0.298	0.108	3.01095e-201
Gnb1	2.51517e-205	0.280917	0.701	0.395	4.29743e-201
Txnrd1	4.65977e-205	0.273107	0.366	0.152	7.96169e-201
Mrps24	2.72516e-204	0.219042	0.665	0.351	4.65622e-200
Hint1	7.67752e-204	0.335048	0.896	0.633	1.31178e-199
Rpn2	8.01805e-204	0.243068	0.615	0.321	1.36996e-199
Cox7a2	1.93881e-203	0.335085	0.87	0.587	3.31266e-199
Stard3nl	2.59606e-203	0.237974	0.504	0.242	4.43563e-199
Hax1	4.33575e-202	0.211583	0.351	0.143	7.40806e-198
Psmd7	6.9692e-202	0.235351	0.569	0.287	1.19076e-197
Edem1	1.96433e-201	0.223617	0.423	0.187	3.35625e-197
1700017B05Rik	2.23351e-201	0.21507	0.209	0.061	3.81618e-197
Eif1b	2.71314e-201	0.208579	0.524	0.256	4.63567e-197
Tomm5	2.72432e-201	0.230764	0.614	0.322	4.65477e-197
Ms4a6b	3.09179e-201	0.273554	0.637	0.343	5.28264e-197
Ccdc124	6.81704e-201	0.219619	0.49	0.233	1.16476e-196
Psmc1	3.00648e-200	0.215177	0.405	0.178	5.13687e-196
Psmd1	5.60975e-200	0.247985	0.373	0.16	9.58481e-196
M6pr	6.4113e-200	0.242556	0.681	0.369	1.09543e-195
Tm6sf1	8.08547e-200	0.233931	0.605	0.312	1.38148e-195
5031439G07Rik	1.26525e-199	0.241465	0.425	0.192	2.16181e-195
Sptssa	2.00735e-199	0.249302	0.604	0.32	3.42976e-195
Glrx2	2.63369e-199	0.202168	0.421	0.188	4.49993e-195
Chchd1	6.04705e-199	0.233004	0.569	0.29	1.0332e-194
Ndufv3	9.28324e-199	0.249326	0.645	0.349	1.58613e-194
Tmem147	5.11608e-197	0.200498	0.487	0.232	8.74133e-193
Xaf1	1.87415e-195	0.240267	0.422	0.189	3.20217e-191
Cyc1	6.58315e-195	0.236287	0.574	0.295	1.1248e-190
Nptn	9.74854e-195	0.236109	0.597	0.312	1.66564e-190
Chchd2	1.09427e-194	0.289291	0.939	0.748	1.86967e-190
Polr2j	1.4729e-194	0.213921	0.503	0.244	2.51659e-190
Eif2s1	6.18738e-192	0.207374	0.517	0.254	1.05718e-187
Nckap1l	7.40789e-192	0.204727	0.447	0.207	1.26571e-187
Mrps28	9.09388e-192	0.224586	0.397	0.177	1.55378e-187
Psmc6	9.97516e-192	0.215497	0.537	0.269	1.70436e-187
F10	2.17939e-191	0.356716	0.232	0.076	3.7237e-187
Arl6ip1	2.6852e-191	0.242332	0.809	0.506	4.58793e-187
Psmc5	3.79626e-191	0.228417	0.512	0.254	6.4863e-187
Ndufa4	3.97921e-191	0.304719	0.882	0.601	6.79888e-187
Nfu1	2.95972e-190	0.200928	0.462	0.219	5.05697e-186
Skap2	3.5681e-190	0.224642	0.646	0.339	6.09646e-186
Rab2a	4.32834e-190	0.222525	0.713	0.408	7.3954e-186
Ufm1	4.35315e-190	0.224893	0.456	0.216	7.4378e-186
Snx1	9.56613e-190	0.215932	0.416	0.19	1.63447e-185
Cfdp1	2.71665e-189	0.204909	0.477	0.228	4.64167e-185
Commd4	2.82645e-189	0.22507	0.542	0.276	4.82927e-185
Ndufs4	3.00791e-189	0.223794	0.614	0.329	5.13931e-185
Psma6	1.11734e-187	0.2227	0.674	0.371	1.90909e-183
Snf8	3.81593e-187	0.206093	0.555	0.285	6.5199e-183
Psmd12	1.39161e-186	0.202447	0.431	0.199	2.37771e-182
Ywhah	1.53768e-186	0.260119	0.736	0.42	2.62728e-182
Psmd6	5.25247e-186	0.210606	0.475	0.23	8.97437e-182
Nedd8	1.18228e-185	0.271646	0.841	0.531	2.02005e-181
Stx3	2.92975e-185	0.234467	0.234	0.08	5.00577e-181
Swi5	5.66613e-185	0.232588	0.736	0.418	9.68115e-181
Map7d1	7.28595e-185	0.202904	0.393	0.174	1.24488e-180
Grpel1	8.41547e-185	0.205235	0.51	0.255	1.43787e-180
Capza2	3.47703e-184	0.259227	0.851	0.531	5.94085e-180
Itgav	1.47946e-183	0.212186	0.235	0.08	2.52781e-179
Uqcrc1	6.00964e-183	0.215272	0.646	0.352	1.02681e-178
Trim25	8.62221e-183	0.227004	0.414	0.19	1.47319e-178
Cyth4	1.06453e-182	0.203939	0.623	0.327	1.81885e-178
Psmb2	2.35527e-182	0.252822	0.791	0.462	4.02422e-178
Rac1	1.45361e-181	0.282522	0.874	0.578	2.48364e-177
Cdc34	1.73388e-179	0.211156	0.299	0.119	2.96251e-175
Cbr2	7.80146e-179	0.287418	0.215	0.069	1.33296e-174
Wdr91	7.85391e-179	0.201534	0.266	0.099	1.34192e-174
Cuta	1.11031e-178	0.209948	0.621	0.337	1.89708e-174
Trf	1.91293e-176	0.252345	0.465	0.236	3.26844e-172
Ywhae	1.08747e-175	0.258735	0.797	0.482	1.85806e-171
Tmem167	1.36903e-175	0.219453	0.633	0.349	2.33913e-171
Rilpl2	2.25225e-175	0.278977	0.627	0.352	3.84819e-171
Ap1s2	3.66052e-175	0.20635	0.393	0.178	6.25437e-171
Ndufb7	1.6491e-174	0.231829	0.776	0.465	2.81765e-170
Atp5k	9.85545e-174	0.224407	0.599	0.324	1.6839e-169
Srgap2	1.19205e-173	0.229215	0.253	0.093	2.03673e-169
Grb2	2.26352e-173	0.20358	0.681	0.383	3.86745e-169
Romo1	3.06125e-173	0.2079	0.584	0.31	5.23044e-169
Atp5j	2.15372e-172	0.267026	0.894	0.614	3.67985e-168
Lcp1	1.41069e-171	0.286003	0.849	0.564	2.41031e-167
Hist1h1c	1.60419e-171	0.204444	0.297	0.12	2.74091e-167
Mrpl12	3.54711e-171	0.201715	0.469	0.232	6.06059e-167
Dennd1a	1.83956e-170	0.201641	0.206	0.067	3.14307e-166
Snx10	3.041e-170	0.216081	0.415	0.196	5.19586e-166
Ndufa13	2.02805e-168	0.282133	0.866	0.589	3.46512e-164
Alcam	2.39375e-166	0.238765	0.385	0.181	4.08996e-162
Prelid1	1.06034e-165	0.226719	0.723	0.423	1.8117e-161
Sgk1	1.15314e-165	0.345292	0.36	0.165	1.97025e-161
Arpc5	2.78402e-165	0.271538	0.893	0.619	4.75677e-161
Cnih4	3.90676e-164	0.219919	0.574	0.309	6.67509e-160
Capzb	6.37839e-164	0.266745	0.886	0.609	1.08981e-159
Hsp90b1	8.36262e-164	0.260357	0.828	0.533	1.42884e-159
Arhgdia	2.62879e-163	0.252529	0.81	0.502	4.49155e-159
Arf1	1.78049e-162	0.241391	0.815	0.523	3.04215e-158
Glipr1	2.35379e-162	0.244361	0.573	0.312	4.02168e-158
Hspa9	1.16308e-161	0.210466	0.443	0.219	1.98724e-157
Mrps21	4.82696e-159	0.202945	0.655	0.373	8.24735e-155
Jpt1	3.23218e-158	0.236899	0.852	0.559	5.52251e-154
Furin	5.80135e-158	0.227627	0.34	0.152	9.91219e-154
Tgfbi	9.37225e-158	0.216579	0.607	0.335	1.60134e-153
Gclm	3.75724e-156	0.263546	0.259	0.103	6.41962e-152
Cops9	1.41452e-154	0.252665	0.725	0.443	2.41684e-150
Eif1a	1.19678e-152	0.216448	0.444	0.225	2.04482e-148
Myl6	4.21432e-151	0.250147	0.945	0.788	7.20058e-147
Clec4n	2.31138e-147	0.247741	0.248	0.098	3.94922e-143
Klf6	3.23177e-145	0.250427	0.906	0.642	5.5218e-141
Erp29	5.63231e-145	0.201392	0.804	0.484	9.62337e-141
Csf2ra	2.37758e-143	0.210492	0.464	0.243	4.06233e-139
Ost4	1.48835e-139	0.224085	0.808	0.529	2.543e-135
Clic1	1.33733e-138	0.24861	0.904	0.665	2.28495e-134
Ppib	1.56175e-138	0.221569	0.847	0.553	2.66841e-134
Tmbim6	3.01487e-138	0.222553	0.868	0.598	5.1512e-134
Atp5j2	3.73325e-138	0.25339	0.871	0.603	6.37863e-134
Ifrd1	4.04231e-138	0.309333	0.636	0.382	6.90669e-134
Ucp2	1.969e-135	0.230485	0.822	0.534	3.36423e-131
Ndufa7	1.03073e-134	0.217516	0.788	0.515	1.76111e-130
Ndufa2	2.22765e-133	0.239181	0.862	0.595	3.80617e-129
Cox4i1	9.05826e-127	0.226584	0.952	0.79	1.54769e-122
Slamf8	4.07038e-121	0.279213	0.35	0.182	6.95465e-117
Qpct	6.78881e-116	0.241438	0.207	0.087	1.15994e-111
Atp5f1	5.53372e-115	0.200856	0.846	0.568	9.45492e-111
Iqgap1	2.88096e-112	0.200526	0.853	0.589	4.92241e-108
Serf2	5.36086e-112	0.228638	0.965	0.799	9.15957e-108
Tax1bp1	2.27016e-110	0.203171	0.724	0.465	3.8788e-106
Cox5b	4.55788e-110	0.201686	0.809	0.541	7.78759e-106
Rgs2	8.48957e-108	0.218937	0.808	0.564	1.45053e-103
Gnai2	8.35629e-105	0.212122	0.881	0.641	1.42776e-100
Arpc2	7.89979e-100	0.203865	0.922	0.734	1.34976e-95
Ubc	1.04523e-90	0.2354	0.92	0.749	1.78589e-86
Gm42418	4.8778e-46	0.558351	0.664	0.509	8.33421e-42
Gm26917	4.15292e-23	0.674584	0.362	0.256	7.09568e-19

## Sheet: DEND4
	p_val	avg_logFC	pct.1	pct.2	p_val_adj
Siglech	0	2.96843	1	0.012	0
Klk1	0	2.79049	0.733	0.001	0
Ccr9	0	2.43382	0.857	0.007	0
Cox6a2	0	2.36948	0.702	0.007	0
Smim5	0	2.07705	0.826	0.025	0
Gm21762	0	1.91829	0.72	0.001	0
Atp1b1	0	1.90828	0.832	0.033	0
Lag3	0	1.7819	0.758	0.034	0
Cd300c	0	1.65747	0.696	0.014	0
Upb1	0	1.62418	0.702	0.034	0
Runx2	0	1.56871	0.714	0.043	0
Spib	0	1.34676	0.683	0.045	0
Pacsin1	0	1.33214	0.59	0.018	0
Klk1b27	0	1.26255	0.41	0.001	0
Atp2a1	0	1.25742	0.547	0.002	0
AC140186.1	0	1.22336	0.435	0.009	0
Lefty1	0	1.15822	0.484	0.014	0
Sla2	0	1.15022	0.522	0.016	0
Paqr5	0	1.09105	0.478	0.005	0
Sh3bgr	0	1.06921	0.41	0.001	0
Mctp2	0	0.940478	0.429	0.008	0
Dntt	0	0.881071	0.311	0.001	0
Spns3	0	0.869754	0.36	0.008	0
Foxr1	0	0.556026	0.236	0.003	0
Ptprf	0	0.512996	0.205	0.003	0
Pdzd4	0	0.507558	0.217	0.003	0
Cd209d	1.9498e-304	1.56189	0.497	0.024	3.33143e-300
Klra17	1.15868e-296	1.0865	0.484	0.023	1.97972e-292
Slco4a1	1.06634e-292	0.512581	0.211	0.004	1.82194e-288
Lrp8	1.6107e-290	0.886011	0.335	0.011	2.75205e-286
Cd7	2.24896e-287	1.72194	0.826	0.072	3.84258e-283
Epha2	1.03791e-243	0.606732	0.248	0.007	1.77337e-239
Rpgrip1	3.27671e-237	1.56911	0.689	0.063	5.59858e-233
Hs3st1	3.86368e-205	0.715323	0.323	0.014	6.60149e-201
Traf4	1.73707e-202	0.86126	0.429	0.027	2.96795e-198
Ly6d	2.58868e-190	2.32034	0.944	0.152	4.42302e-186
Gm5547	2.17261e-180	1.40499	0.658	0.076	3.71212e-176
Lair1	3.57249e-174	1.86385	0.913	0.174	6.10395e-170
Tmem221	4.59913e-169	0.766224	0.335	0.02	7.85807e-165
P2ry14	1.95775e-166	1.45942	0.658	0.084	3.34502e-162
Tex2	5.82187e-165	0.831669	0.385	0.027	9.94724e-161
Tcf4	5.24902e-164	2.01551	0.988	0.242	8.96848e-160
Tsc22d1	9.04137e-160	1.59215	0.739	0.107	1.54481e-155
Bcl11a	2.61252e-158	1.27662	0.714	0.096	4.46376e-154
Prkca	2.3993e-152	1.06735	0.522	0.051	4.09945e-148
Iglc3	5.0721e-149	1.67768	0.789	0.123	8.66619e-145
Cxxc5	2.31389e-147	0.880555	0.435	0.037	3.95352e-143
Gpr171	4.24883e-145	1.5326	0.795	0.136	7.25956e-141
Cd8b1	1.70658e-144	1.38258	0.478	0.045	2.91586e-140
Nucb2	1.5292e-143	1.5317	0.727	0.124	2.6128e-139
Ly6c2	1.78436e-141	2.2713	0.963	0.241	3.04875e-137
Rnase6	3.76962e-141	2.0339	0.957	0.259	6.44077e-137
Khk	9.97562e-136	1.39738	0.689	0.114	1.70443e-131
Fyn	5.64433e-131	1.43462	0.783	0.15	9.6439e-127
Dnajc7	6.80296e-131	2.0046	0.963	0.299	1.16235e-126
Pir	9.44582e-130	0.661171	0.242	0.013	1.61391e-125
Tmem163	5.9142e-124	0.558679	0.248	0.014	1.0105e-119
Arhgap27os2	1.68076e-123	0.713712	0.267	0.017	2.87175e-119
Tmem229b	2.86845e-121	0.972821	0.478	0.057	4.90103e-117
Ctsl	1.01989e-120	1.687	0.981	0.292	1.74259e-116
Kmo	5.4459e-120	1.02809	0.54	0.073	9.30487e-116
Cdh5	9.63099e-119	0.519542	0.292	0.02	1.64555e-114
Hsd11b1	2.17847e-118	1.10525	0.404	0.04	3.72213e-114
Ddr1	6.85347e-117	0.611349	0.286	0.02	1.17098e-112
Jaml	4.56968e-116	1.32835	0.752	0.144	7.80776e-112
Irf8	4.49669e-115	2.21085	1	0.426	7.68304e-111
Bst2	4.0045e-114	2.24576	1	0.532	6.84209e-110
Sell	4.00719e-106	1.20678	0.795	0.163	6.84668e-102
Tbc1d8	1.61408e-105	0.964803	0.553	0.087	2.75782e-101
Plac8	9.07097e-105	1.73474	1	0.395	1.54987e-100
Rnf122	1.57599e-102	0.568181	0.261	0.019	2.69273e-98
Carmil1	1.41154e-101	0.588904	0.242	0.017	2.41175e-97
Ptprs	1.76265e-101	0.820607	0.416	0.05	3.01167e-97
Slc41a2	8.23985e-101	0.506359	0.23	0.015	1.40786e-96
Tspan13	4.24242e-98	1.39196	0.901	0.274	7.2486e-94
St8sia4	1.0739e-96	1.34987	0.863	0.252	1.83487e-92
Rell1	1.91069e-94	1.23664	0.671	0.146	3.2646e-90
Pafah1b3	5.43008e-94	1.12044	0.696	0.155	9.27784e-90
Pld4	1.52537e-90	1.60014	0.963	0.443	2.60625e-86
Scimp	3.04831e-90	1.23759	0.634	0.134	5.20835e-86
Dirc2	7.31353e-89	0.756291	0.398	0.051	1.24959e-84
Mvb12a	1.38555e-88	1.30602	0.814	0.255	2.36734e-84
Rab33b	1.66231e-86	0.682886	0.329	0.036	2.84023e-82
Abhd17b	3.73513e-86	0.880992	0.571	0.104	6.38184e-82
Tyrobp	3.61466e-85	1.2464	1	0.664	6.176e-81
Plxdc1	2.32703e-84	0.594935	0.273	0.026	3.97596e-80
Pgls	1.05787e-82	1.38901	0.938	0.448	1.80747e-78
Sema4b	8.14971e-79	0.533198	0.23	0.019	1.39246e-74
Ly6a	8.31588e-79	1.81323	0.807	0.262	1.42085e-74
Dyrk3	3.80143e-77	0.583107	0.242	0.022	6.49513e-73
Gne	1.67329e-76	0.622265	0.236	0.021	2.85899e-72
Ramp1	3.43377e-76	1.23575	0.708	0.2	5.86693e-72
Zc3h12c	4.13445e-75	0.792809	0.298	0.034	7.06412e-71
Sdc4	5.79786e-74	1.006	0.658	0.156	9.90623e-70
Ccnd1	2.03826e-73	1.17199	0.77	0.227	3.48257e-69
Ptprcap	9.79219e-73	1.02225	0.814	0.216	1.67309e-68
Ppfia4	2.65636e-72	1.10626	0.596	0.147	4.53865e-68
Spint2	1.07592e-69	0.741928	0.547	0.111	1.83832e-65
Rpl31	3.83748e-69	1.16939	1	0.864	6.55672e-65
Grn	2.14607e-68	1.1965	0.988	0.491	3.66677e-64
Hmgn3	3.77334e-67	0.96049	0.472	0.093	6.44713e-63
Slc44a2	5.35497e-67	0.87628	0.571	0.128	9.1495e-63
Gnas	1.22054e-66	1.1665	0.988	0.72	2.08542e-62
Hivep3	1.44412e-65	0.661457	0.292	0.037	2.46742e-61
Fcrla	1.0531e-64	0.812165	0.516	0.1	1.79933e-60
Ccl4	1.74463e-63	1.49137	0.882	0.337	2.98087e-59
Mzb1	2.55018e-63	0.530718	0.447	0.074	4.35724e-59
Calcoco1	2.48e-62	0.427815	0.211	0.02	4.23733e-58
Xbp1	1.36797e-60	1.13063	0.764	0.288	2.33731e-56
Mpeg1	8.5883e-60	1.08153	0.925	0.449	1.4674e-55
Ctsh	1.91135e-59	1.08817	0.988	0.571	3.26573e-55
Rilpl2	3.58667e-59	1.07773	0.888	0.394	6.12818e-55
Cd4	5.60359e-59	0.692569	0.28	0.036	9.5743e-55
Lifr	1.14943e-58	0.642707	0.379	0.065	1.96391e-54
Plaur	1.25864e-58	1.36591	0.795	0.31	2.15051e-54
Ldhb	2.83189e-58	0.65647	0.273	0.036	4.83857e-54
Prr5	6.12989e-58	0.55944	0.298	0.042	1.04735e-53
Pltp	1.25285e-57	0.975042	0.783	0.25	2.14062e-53
Them6	2.2232e-57	0.49444	0.242	0.029	3.79855e-53
Cmah	5.05359e-57	0.63485	0.373	0.061	8.63456e-53
Rilpl1	9.80704e-57	0.439041	0.211	0.022	1.67563e-52
Gapt	6.15614e-56	0.61552	0.224	0.026	1.05184e-51
Rps6ka1	7.55457e-56	0.862885	0.553	0.149	1.29077e-51
Rac2	8.18346e-56	1.03251	0.975	0.619	1.39823e-51
Ncf1	2.50828e-55	1.10511	0.665	0.226	4.28565e-51
Cd69	2.61028e-55	0.888738	0.621	0.163	4.45992e-51
Serp1	9.37932e-55	0.984331	0.95	0.573	1.60255e-50
Hvcn1	1.41044e-54	0.699595	0.472	0.1	2.40987e-50
Pmepa1	2.31823e-54	0.517956	0.242	0.03	3.96092e-50
Ighm	7.169e-54	0.567787	0.969	0.458	1.22489e-49
Snx5	9.99192e-54	1.01264	0.913	0.51	1.70722e-49
Tmed3	1.02901e-53	1.04329	0.739	0.298	1.75817e-49
Lgals1	2.84368e-53	1.0319	0.988	0.568	4.85871e-49
Slamf9	4.37906e-53	0.990124	0.64	0.195	7.48206e-49
Serinc3	7.73361e-53	0.862881	0.994	0.622	1.32136e-48
Cybb	7.92185e-53	0.98043	0.907	0.437	1.35353e-48
Cd164	9.95946e-53	0.960315	0.602	0.18	1.70167e-48
Cd47	9.9984e-53	1.0185	0.95	0.642	1.70833e-48
Syngr2	8.65549e-52	0.943318	0.882	0.411	1.47888e-47
H13	1.3708e-51	1.06121	0.789	0.354	2.34214e-47
Ly86	2.78073e-51	1.04212	0.919	0.498	4.75115e-47
Fgfr1op2	4.83898e-51	0.936802	0.776	0.331	8.26787e-47
Tubgcp5	5.65166e-50	0.595636	0.261	0.038	9.65643e-46
Sub1	5.73634e-50	0.989413	0.981	0.738	9.80111e-46
Slpi	1.41e-49	0.524016	0.478	0.109	2.40913e-45
H2-T23	2.78854e-49	0.946037	0.95	0.583	4.7645e-45
Srgap3	1.04946e-48	0.47539	0.211	0.026	1.79311e-44
Sec61b	2.43645e-48	0.893071	0.963	0.662	4.16291e-44
Fam3c	2.67421e-48	0.875087	0.503	0.135	4.56915e-44
Clec10a	2.98664e-48	0.777284	0.559	0.156	5.10297e-44
Fyb	3.21725e-48	0.906682	0.888	0.442	5.497e-44
Grasp	4.73741e-48	1.05135	0.429	0.099	8.09435e-44
Tifa	5.279e-48	0.932447	0.547	0.165	9.0197e-44
Ly6e	1.38121e-47	0.834652	0.994	0.755	2.35994e-43
R3hdm4	3.91477e-47	0.929719	0.596	0.199	6.68878e-43
Cyth4	3.28005e-46	0.913099	0.795	0.372	5.6043e-42
Tnfrsf13b	3.39517e-46	0.830632	0.509	0.144	5.80099e-42
Fam214a	7.03894e-46	0.487012	0.292	0.048	1.20267e-41
Bloc1s2	1.00269e-44	0.85629	0.677	0.264	1.71319e-40
Nek6	1.15224e-44	0.735412	0.379	0.086	1.96872e-40
Blnk	4.09517e-44	0.758087	0.559	0.171	6.997e-40
Enpp4	6.45394e-44	0.52682	0.205	0.027	1.10272e-39
Tubb2b	7.91222e-44	0.546597	0.255	0.04	1.35188e-39
Csf2rb2	5.34293e-43	0.574828	0.261	0.043	9.12893e-39
Eepd1	8.18496e-43	0.654948	0.304	0.058	1.39848e-38
Dap	1.2029e-42	0.91721	0.652	0.263	2.05528e-38
Unc93b1	2.27442e-42	0.896898	0.882	0.508	3.88608e-38
Galk1	2.61124e-42	0.707516	0.354	0.078	4.46156e-38
Cnp	3.8276e-42	0.929419	0.621	0.231	6.53983e-38
Ppia	2.15326e-41	0.656927	1	0.873	3.67906e-37
Irf1	4.20953e-41	0.790797	0.646	0.233	7.19239e-37
Prr13	5.89393e-41	0.807455	0.87	0.481	1.00704e-36
Selplg	9.14769e-41	0.901263	0.863	0.509	1.56297e-36
Ech1	2.05205e-40	0.873775	0.708	0.309	3.50613e-36
Oaz1	2.32984e-40	0.621321	0.988	0.857	3.98076e-36
Abhd17a	3.31905e-40	0.832372	0.584	0.212	5.67093e-36
Adpgk	1.58566e-39	0.641337	0.292	0.057	2.70925e-35
Rgs10	1.68481e-39	0.928411	0.876	0.478	2.87866e-35
Evi2a	1.80458e-39	0.931678	0.807	0.422	3.0833e-35
Jund	4.0153e-39	0.793106	0.994	0.781	6.86055e-35
Stx7	8.6798e-39	0.835707	0.758	0.369	1.48303e-34
Card11	2.63908e-38	0.675636	0.385	0.096	4.50913e-34
Irf2bp2	1.24055e-37	0.806824	0.565	0.203	2.11961e-33
Ppif	1.68791e-37	0.699364	0.298	0.062	2.88396e-33
Fam174a	3.59962e-37	0.832909	0.696	0.315	6.15032e-33
Atp6v1d	4.5017e-37	0.920743	0.702	0.336	7.6916e-33
Klrd1	2.21274e-36	0.638265	0.528	0.16	3.78069e-32
Gna11	3.0525e-36	0.580951	0.236	0.041	5.21551e-32
Dctn6	1.61153e-35	0.610934	0.435	0.127	2.75346e-31
Smim14	2.04253e-35	0.85064	0.801	0.448	3.48986e-31
Cdkn2d	2.13317e-35	0.719426	0.553	0.192	3.64473e-31
Ubxn4	3.02213e-35	0.8684	0.739	0.374	5.1636e-31
Gltp	3.14541e-35	0.844288	0.82	0.459	5.37425e-31
5430427O19Rik	3.63103e-35	0.697741	0.354	0.089	6.20398e-31
Cd200	4.74352e-35	0.471277	0.28	0.054	8.10479e-31
Ptpn6	9.01833e-35	0.884867	0.795	0.45	1.54087e-30
2022-09-11	1.22667e-34	0.723456	0.503	0.17	2.09588e-30
Tmem59	1.32262e-34	0.849937	0.814	0.465	2.25982e-30
Rabgap1l	1.40436e-34	0.661966	0.441	0.124	2.39949e-30
Tmed2	1.62953e-34	0.724325	0.894	0.532	2.78422e-30
Bmyc	1.72258e-34	0.770071	0.553	0.207	2.9432e-30
Tcf7l2	1.8137e-34	0.499242	0.242	0.044	3.09888e-30
Apobec3	1.83985e-34	0.790609	0.733	0.338	3.14356e-30
H2-Q7	2.06961e-34	1.00989	0.733	0.375	3.53614e-30
Tram1	2.17846e-34	0.770609	0.72	0.348	3.72212e-30
Net1	2.75078e-34	0.574003	0.323	0.075	4.69998e-30
Cib1	2.99048e-34	0.765378	0.584	0.228	5.10954e-30
Hsp90b1	3.73209e-34	0.740826	0.944	0.579	6.37664e-30
Dclre1c	5.01436e-34	0.73993	0.366	0.097	8.56754e-30
mt-Co1	9.5233e-34	0.70906	0.975	0.616	1.62715e-29
Cdip1	2.06202e-33	0.616418	0.373	0.099	3.52316e-29
Mef2c	2.2066e-33	0.614622	0.745	0.329	3.7702e-29
Tlr7	2.86622e-33	0.578917	0.348	0.088	4.89722e-29
Pkig	1.13559e-32	0.74493	0.615	0.255	1.94027e-28
Mgat1	2.10738e-32	0.67534	0.472	0.16	3.60067e-28
Rnf187	2.99254e-32	1.01812	0.652	0.323	5.11306e-28
Man2a2	4.02817e-32	0.488105	0.286	0.063	6.88254e-28
Snx18	7.7879e-32	0.700716	0.398	0.116	1.33064e-27
Rap1a	8.22456e-32	0.7087	0.87	0.564	1.40525e-27
Tcf12	1.46784e-31	0.708654	0.404	0.119	2.50795e-27
Lims1	1.63492e-31	0.667639	0.634	0.283	2.79343e-27
Ubc	2.12093e-31	0.695559	0.975	0.776	3.62381e-27
1700017B05Rik	4.50141e-31	0.541029	0.329	0.084	7.69111e-27
Dusp5	5.82457e-31	0.662894	0.596	0.233	9.95187e-27
Plekhm3	1.55461e-30	0.600548	0.398	0.121	2.6562e-26
Ttc19	6.04159e-30	0.539252	0.311	0.077	1.03227e-25
Herpud1	6.53806e-30	0.806094	0.634	0.283	1.11709e-25
Hpse	3.27828e-29	0.575565	0.335	0.092	5.60127e-25
Mbnl1	4.2998e-29	0.706661	0.863	0.539	7.34664e-25
Sec11c	6.72611e-29	0.754215	0.801	0.479	1.14922e-24
Fam117a	3.44238e-28	0.396671	0.205	0.038	5.88165e-24
Creb3	2.49005e-27	0.688923	0.422	0.152	4.2545e-23
Clec9a	2.54044e-27	0.485798	0.261	0.061	4.34059e-23
BC147527	2.9705e-27	0.607963	0.28	0.071	5.07539e-23
Stambpl1	4.16569e-27	0.424938	0.224	0.045	7.1175e-23
Mtdh	5.13781e-27	0.603427	0.814	0.468	8.77847e-23
Srsf5	7.29782e-27	0.612387	0.932	0.654	1.24691e-22
Ssr1	9.06402e-27	0.657879	0.59	0.272	1.54868e-22
Smim24	1.02595e-26	0.539559	0.224	0.048	1.75293e-22
H3f3b	1.4544e-26	0.43918	1	0.895	2.48499e-22
Cox4i1	2.81534e-26	0.522156	0.981	0.815	4.8103e-22
Tagln2	3.79173e-26	0.649337	0.925	0.602	6.47855e-22
Jakmip1	5.83143e-26	0.355363	0.217	0.043	9.96359e-22
Adipor2	1.11237e-25	0.513128	0.398	0.132	1.9006e-21
Fgr	1.15824e-25	0.536496	0.422	0.146	1.97897e-21
Ifnar2	1.30852e-25	0.72544	0.54	0.244	2.23574e-21
Zmynd8	3.0235e-25	0.609127	0.41	0.142	5.16595e-21
Irf7	3.307e-25	0.869189	0.702	0.354	5.65033e-21
Aaed1	4.59103e-25	0.543275	0.311	0.088	7.84423e-21
H2-T22	4.83066e-25	0.643957	0.696	0.361	8.25367e-21
Cops4	6.02938e-25	0.739744	0.484	0.21	1.03018e-20
Slc35c2	1.11785e-24	0.596737	0.447	0.174	1.90996e-20
Orai3	1.47514e-24	0.580021	0.329	0.101	2.52042e-20
2022-09-01	1.67103e-24	0.393934	0.435	0.136	2.85513e-20
Smc6	1.72638e-24	0.658219	0.665	0.342	2.94969e-20
Ifnar1	2.30675e-24	0.689461	0.453	0.176	3.94132e-20
Slc38a1	2.93411e-24	0.61211	0.602	0.286	5.01322e-20
I830077J02Rik	3.07064e-24	0.459195	0.217	0.048	5.24649e-20
Dbnl	3.14266e-24	0.629462	0.665	0.346	5.36954e-20
Rftn1	4.09986e-24	0.620067	0.441	0.167	7.00502e-20
Ybx3	6.77256e-24	0.677107	0.484	0.207	1.15716e-19
Itpr1	8.03954e-24	0.484209	0.379	0.126	1.37364e-19
H2afy	9.22067e-24	0.59148	0.801	0.472	1.57544e-19
Gpcpd1	9.66405e-24	0.535496	0.547	0.237	1.6512e-19
Clec2i	2.56196e-23	0.573124	0.348	0.111	4.37737e-19
Psme1	3.82511e-23	0.563585	0.87	0.565	6.53558e-19
Cd209a	3.83518e-23	0.43838	0.311	0.085	6.55278e-19
Tmbim6	4.21436e-23	0.602098	0.919	0.64	7.20066e-19
Rexo2	4.35444e-23	0.637755	0.683	0.371	7.43999e-19
Edem2	1.01786e-22	0.710752	0.391	0.149	1.73912e-18
Manf	1.16336e-22	0.599011	0.727	0.413	1.98772e-18
Adk	2.23422e-22	0.551554	0.311	0.097	3.81738e-18
Reep5	2.439e-22	0.587345	0.87	0.578	4.16727e-18
Lsp1	2.48109e-22	0.476787	0.975	0.622	4.23919e-18
H2-K1	4.93705e-22	0.497106	0.969	0.814	8.43545e-18
Atp13a2	5.03545e-22	0.552974	0.385	0.141	8.60356e-18
Emc3	5.63631e-22	0.645486	0.447	0.189	9.6302e-18
Trappc5	7.33069e-22	0.600744	0.447	0.185	1.25252e-17
Tgfbr1	7.89324e-22	0.487498	0.323	0.102	1.34864e-17
Sms	9.69184e-22	0.613423	0.46	0.194	1.65595e-17
Rbbp6	1.05329e-21	0.557509	0.584	0.283	1.79966e-17
Spcs2	1.05977e-21	0.705737	0.758	0.481	1.81072e-17
Txndc5	1.23409e-21	0.640295	0.404	0.157	2.10857e-17
Napsa	1.32484e-21	0.57739	0.752	0.407	2.26363e-17
Pkp3	1.64995e-21	0.492666	0.348	0.115	2.81911e-17
Selenot	1.82962e-21	0.552699	0.621	0.336	3.12609e-17
Tacc1	1.83363e-21	0.577533	0.54	0.253	3.13294e-17
Ptms	2.88994e-21	0.605953	0.689	0.393	4.93776e-17
Ivns1abp	4.10214e-21	0.562973	0.41	0.161	7.00892e-17
Pkib	5.52801e-21	0.855253	0.478	0.215	9.44517e-17
Eif5a	1.77582e-20	0.521101	0.932	0.645	3.03417e-16
Tespa1	1.85213e-20	0.348953	0.236	0.059	3.16456e-16
Svbp	2.25325e-20	0.578107	0.484	0.218	3.8499e-16
Stk17b	2.74755e-20	0.389084	0.832	0.487	4.69446e-16
Fdps	2.79173e-20	0.521449	0.311	0.1	4.76995e-16
Tmem258	2.8598e-20	0.613307	0.733	0.455	4.88625e-16
Eml4	3.74613e-20	0.502451	0.391	0.147	6.40063e-16
Idi1	4.08525e-20	0.500031	0.28	0.083	6.98007e-16
Eif3f	6.23438e-20	0.499533	0.919	0.723	1.06521e-15
Laptm5	6.36713e-20	0.500625	0.969	0.698	1.08789e-15
H2-D1	1.06896e-19	0.442113	1	0.883	1.82642e-15
Dnajc3	1.07482e-19	0.56749	0.565	0.286	1.83644e-15
Psap	1.35503e-19	0.348631	0.988	0.643	2.31521e-15
Selenos	1.88002e-19	0.650596	0.627	0.356	3.21221e-15
Arhgap17	1.94159e-19	0.560874	0.503	0.239	3.3174e-15
Nudt19	2.01085e-19	0.423886	0.292	0.094	3.43574e-15
Zmiz2	2.40861e-19	0.571086	0.36	0.139	4.11536e-15
Ppm1h	2.56612e-19	0.495931	0.335	0.119	4.38448e-15
Krtcap2	2.71537e-19	0.489847	0.776	0.489	4.63949e-15
Cope	5.06502e-19	0.630796	0.665	0.409	8.65408e-15
Uvrag	6.51376e-19	0.615877	0.484	0.226	1.11294e-14
Msmo1	6.72387e-19	0.633997	0.311	0.108	1.14884e-14
Ptpre	1.79411e-18	0.548874	0.553	0.28	3.06541e-14
Gm5617	1.86909e-18	0.491801	0.298	0.102	3.19352e-14
Prkcd	2.61877e-18	0.540006	0.658	0.392	4.47443e-14
Txndc11	2.98743e-18	0.383055	0.267	0.082	5.10432e-14
Acsl1	3.72911e-18	0.438629	0.261	0.08	6.37155e-14
B2m	4.31418e-18	0.440284	0.994	0.901	7.37121e-14
Tapbp	5.11803e-18	0.64831	0.683	0.435	8.74466e-14
Cep57	6.02272e-18	0.423141	0.286	0.093	1.02904e-13
Vcp	8.16214e-18	0.555388	0.677	0.415	1.39458e-13
Rtraf	8.49027e-18	0.501305	0.776	0.496	1.45065e-13
Ergic1	9.58863e-18	0.455057	0.261	0.084	1.63831e-13
Rasgrp2	1.16779e-17	0.365423	0.429	0.166	1.99529e-13
Polr3gl	1.20811e-17	0.498889	0.267	0.086	2.06417e-13
Rps11	4.13759e-17	0.336907	0.994	0.896	7.06948e-13
Malat1	5.25954e-17	0.269501	1	0.914	8.98645e-13
Pdzd8	6.18808e-17	0.369432	0.242	0.073	1.05729e-12
Ppm1m	6.68318e-17	0.567101	0.441	0.203	1.14189e-12
Lmo2	6.98586e-17	0.456137	0.522	0.264	1.1936e-12
Nptn	8.75198e-17	0.521047	0.615	0.357	1.49536e-12
Hsdl2	8.8969e-17	0.411095	0.261	0.087	1.52012e-12
Rnf13	9.30993e-17	0.459836	0.46	0.221	1.5907e-12
Sec61g	1.00818e-16	0.512419	0.888	0.67	1.72257e-12
Slc3a2	1.06511e-16	0.571783	0.733	0.491	1.81984e-12
Pqlc3	1.29979e-16	0.558281	0.323	0.128	2.22082e-12
Cnpy2	1.67671e-16	0.575696	0.478	0.253	2.86482e-12
Dnajc13	1.94899e-16	0.411246	0.298	0.108	3.33005e-12
Hmgb1	2.21214e-16	0.440355	0.745	0.464	3.77966e-12
AI467606	2.32501e-16	0.467188	0.348	0.139	3.97251e-12
Flt3	3.08541e-16	0.410782	0.304	0.11	5.27173e-12
Gna15	3.11218e-16	0.527648	0.261	0.089	5.31747e-12
Ssr4	3.89004e-16	0.511735	0.776	0.535	6.64652e-12
Psmb8	4.4952e-16	0.356231	0.944	0.657	7.6805e-12
Eif3h	6.79569e-16	0.405212	0.901	0.652	1.16111e-11
Psmb1	8.72703e-16	0.415762	0.876	0.647	1.4911e-11
Cldnd1	9.35479e-16	0.463651	0.435	0.206	1.59836e-11
Inpp4a	9.48977e-16	0.422961	0.211	0.062	1.62142e-11
H2afj	1.02595e-15	0.685133	0.708	0.489	1.75294e-11
mt-Co3	1.02794e-15	0.444199	0.845	0.531	1.75633e-11
Med10	1.60052e-15	0.471006	0.491	0.258	2.73466e-11
Ctsz	1.60904e-15	0.317073	0.919	0.58	2.74921e-11
Clec12a	1.91047e-15	0.647181	0.602	0.366	3.26422e-11
Tubb2a	2.04319e-15	0.553605	0.534	0.295	3.49099e-11
Btg1	2.12289e-15	0.299087	0.963	0.761	3.62717e-11
Scand1	2.3601e-15	0.451829	0.733	0.47	4.03246e-11
Tmed9	2.39271e-15	0.443462	0.795	0.517	4.08818e-11
Sys1	2.4579e-15	0.503751	0.596	0.359	4.19957e-11
Alkbh1	2.90387e-15	0.46899	0.329	0.13	4.96156e-11
Atraid	3.08525e-15	0.509727	0.484	0.253	5.27146e-11
Ppp1cc	3.25936e-15	0.441715	0.615	0.363	5.56895e-11
Snx9	3.32642e-15	0.502505	0.391	0.182	5.68352e-11
Rps9	3.52671e-15	0.296949	1	0.901	6.02574e-11
Spty2d1	4.27012e-15	0.52496	0.453	0.224	7.29592e-11
Hist3h2a	4.71263e-15	0.529748	0.335	0.139	8.052e-11
Hspa5	5.02283e-15	0.358153	0.944	0.656	8.582e-11
Igsf8	6.25206e-15	0.528154	0.311	0.126	1.06823e-10
Alox5ap	7.08622e-15	0.357019	0.938	0.548	1.21075e-10
Fam43a	7.14319e-15	0.325445	0.205	0.058	1.22049e-10
Trib1	1.12903e-14	0.464746	0.46	0.234	1.92907e-10
Cmtm7	1.16413e-14	0.489298	0.671	0.423	1.98903e-10
Pip5k1c	1.27938e-14	0.403042	0.28	0.104	2.18594e-10
Hsp90ab1	1.73999e-14	0.417735	1	0.817	2.97295e-10
Runx3	1.79392e-14	0.429522	0.335	0.137	3.0651e-10
Cd300lf	2.44887e-14	0.389266	0.23	0.075	4.18414e-10
Scarb2	2.6241e-14	0.470243	0.46	0.241	4.48353e-10
Surf4	2.86979e-14	0.442053	0.478	0.256	4.90332e-10
Sp140	3.28263e-14	0.55123	0.453	0.237	5.60871e-10
Prdx5	3.32559e-14	0.287094	0.814	0.534	5.6821e-10
Ywhae	3.85003e-14	0.50834	0.764	0.532	6.57816e-10
Mfsd14a	4.22244e-14	0.458035	0.373	0.172	7.21447e-10
Trim30a	4.45279e-14	0.555643	0.565	0.326	7.60804e-10
Spin1	4.69367e-14	0.354302	0.242	0.083	8.01961e-10
Ddost	4.71596e-14	0.489738	0.565	0.342	8.05769e-10
Sik1	5.05092e-14	0.466896	0.317	0.127	8.63e-10
mt-Atp6	5.45544e-14	0.42339	0.839	0.533	9.32116e-10
Ssr2	5.5509e-14	0.50786	0.553	0.337	9.48426e-10
Rgs18	5.62132e-14	0.474352	0.311	0.13	9.60459e-10
Pml	6.00935e-14	0.363539	0.267	0.098	1.02676e-09
Ndufs8	6.15938e-14	0.455756	0.59	0.362	1.05239e-09
Csf2rb	6.74428e-14	0.524551	0.404	0.2	1.15233e-09
Dad1	7.5232e-14	0.389378	0.832	0.587	1.28541e-09
Slc7a6os	7.98236e-14	0.497544	0.286	0.11	1.36387e-09
Sdhb	9.09431e-14	0.389131	0.708	0.45	1.55385e-09
Cd37	9.20457e-14	0.297152	0.658	0.394	1.57269e-09
Cnpy3	1.00733e-13	0.416948	0.416	0.211	1.72112e-09
Mapkapk2	1.12106e-13	0.469017	0.453	0.236	1.91545e-09
Ppdpf	1.15803e-13	0.381392	0.559	0.315	1.9786e-09
Coro2a	1.49185e-13	0.445253	0.298	0.124	2.54898e-09
Ripor2	2.00081e-13	0.238431	0.292	0.103	3.41858e-09
Nr2c2ap	2.73519e-13	0.494134	0.354	0.165	4.67335e-09
Lman2	2.88624e-13	0.41952	0.621	0.388	4.93143e-09
Fgfr1op	3.92123e-13	0.469265	0.23	0.08	6.69981e-09
Tomm20	4.23258e-13	0.420139	0.783	0.557	7.23178e-09
Map7d1	5.15838e-13	0.477162	0.404	0.209	8.8136e-09
Hnrnpa1	5.2146e-13	0.402436	0.764	0.534	8.90966e-09
Tmem160	5.36621e-13	0.491769	0.671	0.457	9.1687e-09
Gpr146	5.53781e-13	0.301176	0.205	0.066	9.4619e-09
Ubb	6.72726e-13	0.329264	0.988	0.886	1.14942e-08
Ptpn1	7.69837e-13	0.402925	0.596	0.37	1.31534e-08
Apc	7.89193e-13	0.428635	0.261	0.099	1.34841e-08
Ctso	1.02821e-12	0.412416	0.28	0.111	1.7568e-08
Rrbp1	1.07911e-12	0.470825	0.764	0.535	1.84377e-08
Senp6	1.23081e-12	0.35377	0.391	0.189	2.10296e-08
Arhgap30	1.26526e-12	0.450271	0.609	0.39	2.16182e-08
Slc15a4	1.43065e-12	0.467914	0.323	0.145	2.44441e-08
Cd44	1.48828e-12	0.545714	0.621	0.418	2.54287e-08
Selenow	1.54904e-12	0.388982	0.901	0.668	2.64669e-08
Stat1	1.55221e-12	0.508175	0.528	0.307	2.65211e-08
Ptp4a3	1.95083e-12	0.297531	0.404	0.189	3.33319e-08
Cct5	2.41083e-12	0.470604	0.658	0.444	4.11914e-08
Pmaip1	2.7361e-12	0.428	0.497	0.265	4.67491e-08
Adssl1	2.77234e-12	0.48151	0.385	0.193	4.73683e-08
Mettl23	2.78656e-12	0.45693	0.491	0.277	4.76112e-08
Atp1a1	3.54833e-12	0.425982	0.59	0.38	6.06267e-08
Ubl7	3.88618e-12	0.428673	0.317	0.143	6.63993e-08
Ap1ar	4.71245e-12	0.365684	0.205	0.071	8.05169e-08
Ppp6r1	4.72008e-12	0.360156	0.255	0.099	8.06473e-08
Map1lc3b	4.81544e-12	0.370271	0.807	0.597	8.22766e-08
Emc10	5.4355e-12	0.466094	0.497	0.297	9.2871e-08
Hsp90aa1	5.55136e-12	0.449682	0.925	0.724	9.48505e-08
Luc7l2	5.9302e-12	0.363191	0.696	0.468	1.01323e-07
Anapc5	6.11682e-12	0.465596	0.453	0.257	1.04512e-07
Gns	6.12216e-12	0.43893	0.429	0.23	1.04603e-07
Psme2	6.71458e-12	0.385815	0.745	0.506	1.14725e-07
Saraf	7.43248e-12	0.306644	0.602	0.381	1.26991e-07
Npc1	7.53349e-12	0.414991	0.292	0.125	1.28717e-07
Mrfap1	8.08302e-12	0.402645	0.714	0.501	1.38106e-07
Ikzf1	8.35444e-12	0.324089	0.435	0.219	1.42744e-07
Rufy1	9.2216e-12	0.395764	0.255	0.103	1.5756e-07
Kdelr1	1.01851e-11	0.379675	0.447	0.251	1.74022e-07
Fam122a	1.07475e-11	0.309273	0.23	0.086	1.83632e-07
Hnrnpa2b1	1.08339e-11	0.374004	0.901	0.682	1.85109e-07
Dgcr6	1.11363e-11	0.395592	0.211	0.077	1.90275e-07
Rnd3	1.17773e-11	0.460781	0.23	0.088	2.01228e-07
M6pr	1.17953e-11	0.504488	0.627	0.419	2.01534e-07
Bcl7c	1.19043e-11	0.489148	0.348	0.173	2.03397e-07
Taldo1	1.22992e-11	0.279295	0.839	0.555	2.10143e-07
Arl4a	1.27054e-11	0.37472	0.323	0.145	2.17084e-07
Samsn1	1.27986e-11	0.421651	0.478	0.254	2.18677e-07
Ebpl	1.43337e-11	0.400923	0.292	0.129	2.44905e-07
Hmgcr	1.75178e-11	0.356721	0.242	0.094	2.99309e-07
Kctd12	1.8204e-11	0.397292	0.553	0.335	3.11033e-07
E2f4	1.91062e-11	0.392903	0.311	0.144	3.26449e-07
Rab24	2.11274e-11	0.441708	0.398	0.215	3.60983e-07
Ywhaq	2.5734e-11	0.421602	0.64	0.433	4.3969e-07
Nop53	2.7527e-11	0.322818	0.752	0.542	4.70326e-07
Rgcc	3.25285e-11	0.658172	0.404	0.211	5.55782e-07
Arhgef6	3.45939e-11	0.491124	0.335	0.165	5.91072e-07
Uchl3	3.4842e-11	0.406509	0.391	0.206	5.9531e-07
Glrx3	3.53096e-11	0.455489	0.54	0.35	6.033e-07
Arf4	3.84478e-11	0.405637	0.683	0.461	6.56919e-07
Vgll4	4.00729e-11	0.308405	0.304	0.13	6.84686e-07
Emc8	4.24534e-11	0.465986	0.342	0.171	7.25358e-07
Top1	5.02729e-11	0.447824	0.596	0.4	8.58962e-07
Cd82	5.23269e-11	0.517579	0.36	0.181	8.94058e-07
Fus	5.44146e-11	0.302465	0.807	0.571	9.29728e-07
Cmas	5.62948e-11	0.386947	0.379	0.199	9.61853e-07
Hes6	7.52781e-11	0.380902	0.267	0.115	1.2862e-06
Smad7	7.82706e-11	0.213837	0.273	0.109	1.33733e-06
Cirbp	7.98269e-11	0.350809	0.466	0.252	1.36392e-06
Zfp36l1	8.2454e-11	0.364485	0.634	0.402	1.40881e-06
Npc2	8.3111e-11	0.236318	0.963	0.68	1.42003e-06
Magt1	8.62495e-11	0.428482	0.429	0.247	1.47366e-06
Dnajb1	9.93681e-11	0.51504	0.509	0.304	1.6978e-06
Slc30a5	1.09232e-10	0.392176	0.261	0.111	1.86634e-06
Uso1	1.16084e-10	0.384078	0.298	0.138	1.98341e-06
Tnni2	1.20467e-10	0.317724	0.342	0.16	2.0583e-06
H2-Q4	1.2421e-10	0.296577	0.348	0.164	2.12225e-06
Ostc	1.27084e-10	0.369597	0.602	0.39	2.17136e-06
Lztfl1	1.42576e-10	0.440739	0.236	0.095	2.43605e-06
Psmb2	1.49585e-10	0.373489	0.745	0.514	2.55581e-06
2310039H08Rik	1.5074e-10	0.369032	0.242	0.1	2.57554e-06
Ogt	1.73154e-10	0.411772	0.391	0.202	2.9585e-06
S1pr4	1.78837e-10	0.215594	0.217	0.077	3.05562e-06
Atxn7l3b	1.81932e-10	0.46825	0.447	0.262	3.10849e-06
Atp6ap2	1.87415e-10	0.355905	0.547	0.343	3.20217e-06
Atp5c1	1.91398e-10	0.367619	0.82	0.582	3.27023e-06
Mpc1	1.94617e-10	0.382806	0.627	0.424	3.32523e-06
Bmp2k	2.14767e-10	0.375148	0.317	0.148	3.6695e-06
Baz2a	2.24196e-10	0.315182	0.255	0.106	3.83061e-06
Srrm2	2.57979e-10	0.311434	0.77	0.587	4.40782e-06
Hhex	2.74364e-10	0.418594	0.329	0.162	4.68779e-06
U2af1	2.76166e-10	0.380897	0.602	0.401	4.71858e-06
H2-Ke6	2.79371e-10	0.279588	0.298	0.136	4.77333e-06
Srsf6	3.12676e-10	0.386312	0.547	0.355	5.34238e-06
Ndufa11	3.44407e-10	0.330902	0.602	0.397	5.88453e-06
Jtb	3.46807e-10	0.368688	0.484	0.299	5.92554e-06
Cdc42se1	3.59298e-10	0.458526	0.472	0.287	6.13896e-06
Pycr2	3.66805e-10	0.359801	0.273	0.124	6.26723e-06
Zfp644	4.05828e-10	0.285255	0.323	0.155	6.93398e-06
Tmem173	4.28853e-10	0.336411	0.298	0.141	7.32738e-06
Stat3	4.73644e-10	0.336056	0.528	0.322	8.09268e-06
Lman2l	4.96216e-10	0.333324	0.211	0.083	8.47834e-06
Dnajb6	5.60075e-10	0.331814	0.565	0.374	9.56945e-06
Fkbp2	5.84238e-10	0.384563	0.584	0.375	9.98229e-06
Gabarapl2	6.09015e-10	0.3646	0.652	0.486	1.04056e-05
Snw1	6.42301e-10	0.312383	0.503	0.307	1.09744e-05
Minos1	6.96135e-10	0.384146	0.752	0.559	1.18942e-05
Ctnnbl1	7.76887e-10	0.320343	0.267	0.121	1.32739e-05
Me2	8.29204e-10	0.415019	0.342	0.178	1.41678e-05
Srp9	8.63513e-10	0.323915	0.764	0.566	1.4754e-05
mt-Nd1	8.69287e-10	0.305175	0.733	0.484	1.48526e-05
Hmgcs1	8.72142e-10	0.462646	0.242	0.104	1.49014e-05
Zeb2	8.93161e-10	0.26332	0.658	0.413	1.52605e-05
Ppp1r14b	1.04233e-09	0.449633	0.385	0.22	1.78092e-05
Eps15	1.22435e-09	0.405456	0.323	0.165	2.09193e-05
Spn	1.2355e-09	0.261762	0.261	0.111	2.11097e-05
Trim26	1.24651e-09	0.285881	0.298	0.141	2.12979e-05
Mrpl52	1.30318e-09	0.339515	0.671	0.474	2.22661e-05
Stx16	1.72889e-09	0.302587	0.366	0.196	2.95399e-05
Klf13	2.00714e-09	0.485343	0.509	0.339	3.4294e-05
Rcc2	2.05544e-09	0.349051	0.304	0.149	3.51193e-05
Arpc5l	2.08211e-09	0.328399	0.54	0.348	3.55749e-05
mt-Co2	2.44769e-09	0.273047	0.733	0.484	4.18212e-05
Hnrnpf	2.6371e-09	0.279303	0.851	0.665	4.50575e-05
Tmed5	2.77114e-09	0.324821	0.565	0.373	4.73477e-05
Rbm39	3.01564e-09	0.221973	0.95	0.806	5.15252e-05
Spcs3	3.26171e-09	0.407851	0.311	0.163	5.57296e-05
Sin3b	3.5931e-09	0.343923	0.578	0.394	6.13916e-05
Clcn3	4.00694e-09	0.399583	0.23	0.099	6.84626e-05
Cd180	4.04229e-09	0.425442	0.335	0.181	6.90666e-05
Fbl	4.43493e-09	0.38052	0.534	0.353	7.57752e-05
AC149090.1	4.49075e-09	0.33834	0.292	0.139	7.67289e-05
Eef2	4.53167e-09	0.251552	0.95	0.771	7.74282e-05
Atp5g2	4.67766e-09	0.318094	0.832	0.641	7.99225e-05
Timm13	4.80738e-09	0.342608	0.658	0.458	8.2139e-05
Pip4k2a	4.96787e-09	0.403901	0.41	0.243	8.4881e-05
Exosc5	5.01856e-09	0.319517	0.304	0.155	8.5747e-05
Elf1	5.07429e-09	0.261435	0.584	0.382	8.66994e-05
Zfp131	5.35256e-09	0.33704	0.286	0.137	9.14538e-05
Pfdn5	5.45594e-09	0.239217	0.944	0.793	9.32202e-05
Pigp	6.02859e-09	0.347727	0.329	0.172	0.000103005
Etnk1	6.15934e-09	0.308283	0.323	0.163	0.000105238
Rbm4b	6.68976e-09	0.287147	0.311	0.153	0.000114301
Hnrnpul1	6.90429e-09	0.331057	0.329	0.173	0.000117967
Cox7a2l	7.19516e-09	0.233149	0.851	0.656	0.000122936
2022-09-09	7.3081e-09	0.413211	0.404	0.247	0.000124866
Eef1g	7.50922e-09	0.242872	0.944	0.737	0.000128303
Rcsd1	7.6009e-09	0.25504	0.342	0.172	0.000129869
Snrpd2	7.61763e-09	0.298412	0.665	0.471	0.000130155
Hint3	7.62481e-09	0.365493	0.286	0.144	0.000130278
Mrps16	8.14966e-09	0.38403	0.472	0.305	0.000139245
Cox14	8.4237e-09	0.34931	0.621	0.445	0.000143927
Pmvk	9.10983e-09	0.331588	0.286	0.142	0.000155651
Rnf167	1.01841e-08	0.317213	0.267	0.124	0.000174005
Psmb10	1.05882e-08	0.347375	0.615	0.439	0.00018091
Erg28	1.09027e-08	0.391697	0.292	0.15	0.000186283
Prcp	1.13026e-08	0.347824	0.522	0.35	0.000193117
Bri3bp	1.1543e-08	0.407845	0.298	0.154	0.000197225
Snd1	1.16724e-08	0.301047	0.248	0.116	0.000199435
Sltm	1.20646e-08	0.34029	0.441	0.268	0.000206136
Atp6v0b	1.25221e-08	0.261241	0.826	0.575	0.000213952
Ctbp1	1.48233e-08	0.369344	0.447	0.289	0.000253271
Setd1b	1.50526e-08	0.344677	0.217	0.093	0.000257189
Nub1	1.51339e-08	0.349347	0.28	0.138	0.000258578
Gtf2i	1.58568e-08	0.2823	0.211	0.088	0.000270929
Nsmce2	1.62775e-08	0.314936	0.311	0.163	0.000278117
Sec61a1	1.65251e-08	0.426609	0.373	0.217	0.000282347
Arpc3	1.66481e-08	0.244064	0.925	0.729	0.000284449
Slc29a3	1.83608e-08	0.339644	0.298	0.155	0.000313713
Rpn2	1.93201e-08	0.365109	0.54	0.368	0.000330102
Scamp2	2.04554e-08	0.319462	0.416	0.254	0.000349502
Git2	2.16196e-08	0.308723	0.379	0.216	0.000369393
Filip1l	2.23784e-08	0.391492	0.366	0.204	0.000382357
Itga4	2.25348e-08	0.286366	0.466	0.278	0.00038503
Emp3	2.29249e-08	0.274214	0.894	0.624	0.000391694
Ddx3y	2.35428e-08	0.281117	0.391	0.223	0.000402253
Slc25a4	2.39193e-08	0.349424	0.565	0.379	0.000408684
Pnn	2.40669e-08	0.263478	0.447	0.267	0.000411207
Eif5	2.4686e-08	0.297335	0.801	0.622	0.000421785
Iqgap2	2.95575e-08	0.41778	0.304	0.164	0.000505019
Syk	3.0544e-08	0.266512	0.416	0.244	0.000521875
Sec13	3.17014e-08	0.364637	0.373	0.22	0.00054165
Cnbp	3.25873e-08	0.207851	0.801	0.621	0.000556787
Tspan31	3.32232e-08	0.366097	0.335	0.192	0.000567651
Smdt1	3.63096e-08	0.268319	0.807	0.574	0.000620386
Hmgn1	3.71952e-08	0.287495	0.516	0.329	0.000635517
Nedd9	3.84329e-08	0.298767	0.273	0.13	0.000656664
Sp110	3.97716e-08	0.344387	0.398	0.231	0.000679538
Ccni	3.98568e-08	0.369934	0.335	0.184	0.000680993
Tpd52	4.40753e-08	0.273026	0.646	0.447	0.000753071
Lncpint	4.53678e-08	0.265935	0.242	0.11	0.000775154
Bhlhe40	4.70398e-08	0.309276	0.391	0.224	0.000803722
Psma2	5.17692e-08	0.269535	0.764	0.56	0.000884529
Srp19	5.74115e-08	0.357268	0.429	0.276	0.000980932
Tmem147	5.84235e-08	0.360532	0.422	0.273	0.000998224
Frmd4a	5.99704e-08	0.278648	0.217	0.098	0.00102465
Itm2c	6.09722e-08	0.366121	0.54	0.372	0.00104177
Rassf5	6.41968e-08	0.258309	0.298	0.153	0.00109687
Hspe1	6.55483e-08	0.317403	0.814	0.631	0.00111996
Tspyl1	6.84038e-08	0.330395	0.236	0.111	0.00116875
BC031181	6.94698e-08	0.318278	0.509	0.348	0.00118696
Dctn3	7.09095e-08	0.297682	0.578	0.409	0.00121156
Jmjd1c	7.32486e-08	0.389197	0.503	0.338	0.00125153
Zbtb20	7.32759e-08	0.255456	0.335	0.177	0.00125199
Stt3a	7.8813e-08	0.412562	0.317	0.182	0.0013466
Eif3e	8.87777e-08	0.255035	0.733	0.568	0.00151686
Hnrnpu	8.91764e-08	0.314337	0.714	0.542	0.00152367
Gm26699	8.99223e-08	0.248911	0.248	0.117	0.00153641
Pcyt1a	1.06797e-07	0.411732	0.242	0.118	0.00182473
Tmem50a	1.07235e-07	0.270774	0.727	0.532	0.00183222
Acin1	1.11025e-07	0.303554	0.509	0.344	0.00189697
Snf8	1.14711e-07	0.327767	0.472	0.328	0.00195994
Pomp	1.20293e-07	0.223375	0.882	0.606	0.00205533
Gtpbp2	1.21499e-07	0.238432	0.267	0.131	0.00207593
Ndufb10	1.23051e-07	0.272914	0.64	0.47	0.00210245
Insig1	1.40685e-07	0.328248	0.261	0.13	0.00240374
Slc50a1	1.47253e-07	0.238316	0.317	0.17	0.00251596
Nktr	1.50909e-07	0.332849	0.497	0.333	0.00257843
Imp3	1.62057e-07	0.286114	0.398	0.243	0.00276891
Cd53	1.74529e-07	0.225765	0.876	0.64	0.00298201
Ndufb9	1.75527e-07	0.285693	0.677	0.5	0.00299906
Arf1	1.78662e-07	0.276832	0.776	0.57	0.00305262
Ppp1r11	1.88997e-07	0.307679	0.503	0.333	0.0032292
Cox8a	1.98105e-07	0.2252	0.969	0.768	0.00338482
Nceh1	2.06919e-07	0.344692	0.311	0.172	0.00353542
Stk4	2.43167e-07	0.243337	0.366	0.211	0.00415476
Rtf1	2.49309e-07	0.294034	0.453	0.3	0.0042597
Grap	2.5415e-07	0.245051	0.236	0.108	0.00434241
Eif2a	2.70015e-07	0.322076	0.348	0.207	0.00461348
Ifi35	2.79859e-07	0.38335	0.484	0.327	0.00478167
Nono	2.90831e-07	0.352225	0.484	0.338	0.00496914
Mrps34	2.95834e-07	0.423087	0.304	0.178	0.00505462
Ufd1	3.02746e-07	0.282519	0.255	0.132	0.00517272
Arl5c	3.0992e-07	0.247382	0.348	0.191	0.00529529
Plp2	3.10677e-07	0.398542	0.335	0.198	0.00530822
Ergic3	3.33453e-07	0.407378	0.416	0.28	0.00569737
Cbfa2t3	3.33918e-07	0.376746	0.354	0.209	0.00570533
Nek7	3.50459e-07	0.329241	0.298	0.164	0.00598795
Ttc14	3.62877e-07	0.306159	0.323	0.179	0.00620012
Psma3	3.93828e-07	0.249317	0.801	0.605	0.00672894
Tmed10	3.9909e-07	0.289577	0.702	0.522	0.00681885
Arglu1	4.12043e-07	0.30827	0.435	0.283	0.00704017
Commd4	4.19924e-07	0.310745	0.472	0.318	0.00717482
Coq2	4.27192e-07	0.365262	0.242	0.126	0.007299
Chic2	4.33094e-07	0.26933	0.472	0.319	0.00739984
Cop1	4.51505e-07	0.305763	0.261	0.138	0.00771442
Sptssa	4.68777e-07	0.368152	0.509	0.366	0.00800953
Tmem219	4.80584e-07	0.453277	0.422	0.292	0.00821126
Coa5	4.8312e-07	0.275977	0.292	0.163	0.00825459
Npm1	4.86167e-07	0.238994	0.907	0.75	0.00830666
Rpl36al	4.8919e-07	0.307908	0.652	0.498	0.00835829
Spcs1	4.93626e-07	0.314809	0.634	0.469	0.00843409
Anapc16	5.01218e-07	0.301768	0.354	0.215	0.0085638
Abcf1	5.05675e-07	0.28753	0.391	0.244	0.00863997
Bscl2	5.15785e-07	0.322255	0.348	0.212	0.0088127
Amfr	5.26666e-07	0.340089	0.304	0.174	0.00899861
Nsmaf	5.35226e-07	0.303214	0.205	0.096	0.00914487
Mau2	5.47248e-07	0.274579	0.236	0.117	0.00935029
Jpt1	5.56762e-07	0.251888	0.82	0.606	0.00951283
Ddx50	5.78849e-07	0.272108	0.422	0.27	0.00989021
Mpnd	6.11031e-07	0.364713	0.28	0.158	0.0104401
Gcnt2	6.22979e-07	0.317974	0.217	0.102	0.0106442
Inpp5k	6.62221e-07	0.288708	0.217	0.106	0.0113147
Nrd1	6.75697e-07	0.441378	0.348	0.212	0.011545
Psma5	6.86342e-07	0.280105	0.584	0.43	0.0117268
Psmb9	6.98372e-07	0.262407	0.615	0.445	0.0119324
Itgb7	6.99527e-07	0.222869	0.472	0.296	0.0119521
Mef2d	7.18498e-07	0.241851	0.286	0.152	0.0122763
Parp8	7.21538e-07	0.29305	0.224	0.111	0.0123282
Kctd10	7.55982e-07	0.264352	0.23	0.114	0.0129167
Slc39a7	7.63274e-07	0.276285	0.273	0.149	0.0130413
Uggt1	8.0039e-07	0.327495	0.242	0.126	0.0136755
Ikbkb	8.20843e-07	0.25531	0.466	0.315	0.0140249
Fip1l1	8.40479e-07	0.334766	0.311	0.181	0.0143604
H2-M3	8.47797e-07	0.345412	0.366	0.23	0.0144855
Dnajb9	8.99685e-07	0.266603	0.385	0.236	0.015372
Tax1bp1	1.00934e-06	0.226373	0.671	0.506	0.0172455
Hnrnpl	1.05626e-06	0.267436	0.385	0.239	0.0180473
Zfp277	1.06429e-06	0.269292	0.224	0.113	0.0181844
Syf2	1.13772e-06	0.222447	0.522	0.366	0.0194392
Stt3b	1.2243e-06	0.2058	0.335	0.196	0.0209185
Arl6ip5	1.23378e-06	0.238586	0.602	0.438	0.0210803
2022-09-07	1.30072e-06	0.264478	0.646	0.478	0.0222241
Cdk5rap3	1.30512e-06	0.295783	0.224	0.112	0.0222993
Eid1	1.35079e-06	0.309469	0.329	0.202	0.0230797
Atp6v0e	1.3763e-06	0.227101	0.876	0.64	0.0235155
Dcaf7	1.39393e-06	0.262005	0.224	0.112	0.0238167
Lsm6	1.43631e-06	0.300691	0.478	0.34	0.0245407
Rab21	1.49049e-06	0.302137	0.354	0.218	0.0254664
R3hdm1	1.52435e-06	0.318739	0.298	0.17	0.026045
Acbd5	1.54692e-06	0.379881	0.255	0.137	0.0264308
Ift20	1.56391e-06	0.32772	0.398	0.265	0.026721
Ndufa13	1.58526e-06	0.231223	0.826	0.633	0.0270857
Gnaq	1.67122e-06	0.29693	0.248	0.133	0.0285544
Atrx	1.67241e-06	0.342603	0.478	0.338	0.0285748
Cct7	1.74944e-06	0.282944	0.528	0.382	0.0298908
Psmb3	1.75109e-06	0.279368	0.677	0.51	0.0299191
Cnot8	1.81403e-06	0.305208	0.242	0.129	0.0309945
Fndc3a	1.95032e-06	0.353069	0.317	0.189	0.0333231
Fam46c	1.96985e-06	0.372946	0.273	0.152	0.0336569
Chmp4b	1.97513e-06	0.297207	0.671	0.508	0.033747
Abi3	2.04717e-06	0.239928	0.236	0.121	0.034978
Atf6b	2.07745e-06	0.349805	0.236	0.127	0.0354953
Mydgf	2.14332e-06	0.30961	0.435	0.309	0.0366208
Kmt2e	2.24224e-06	0.21806	0.516	0.358	0.038311
Mtpn	2.31473e-06	0.270052	0.509	0.365	0.0395495
Pink1	2.44753e-06	0.347926	0.224	0.115	0.0418185
Sec22b	2.51485e-06	0.295655	0.298	0.176	0.0429688
Park7	2.54191e-06	0.256509	0.671	0.507	0.0434311
Gatad1	2.66949e-06	0.280192	0.248	0.136	0.0456108
Gng12	2.71464e-06	0.493978	0.348	0.228	0.0463824
Rsbn1l	2.83445e-06	0.251626	0.391	0.251	0.0484293
Kif5b	2.88919e-06	0.2293	0.596	0.433	0.0493646
Erp29	2.93093e-06	0.209283	0.739	0.535	0.0500779
Rer1	2.94705e-06	0.316696	0.54	0.416	0.0503533
Uqcrq	2.95935e-06	0.200427	0.758	0.551	0.0505634
Tmbim4	2.96727e-06	0.293931	0.472	0.333	0.0506988
Slc35b1	2.9924e-06	0.310266	0.329	0.205	0.0511281
Trabd	3.28569e-06	0.259601	0.255	0.139	0.0561393
Lyn	3.31612e-06	0.304407	0.503	0.363	0.0566592
Txndc15	3.32238e-06	0.347999	0.354	0.228	0.0567662
Dhrs7	3.45523e-06	0.281884	0.304	0.182	0.0590361
Mark3	3.61709e-06	0.322654	0.211	0.107	0.0618017
Fam173a	3.77935e-06	0.275125	0.373	0.246	0.064574
Srpk2	3.80387e-06	0.30217	0.304	0.174	0.0649929
Pdia3	3.82668e-06	0.270139	0.727	0.536	0.0653827
Tagap	3.88918e-06	0.259446	0.242	0.124	0.0664506
Cetn2	3.89485e-06	0.268725	0.286	0.164	0.0665473
Hibadh	3.96612e-06	0.274719	0.273	0.156	0.0677651
Pdlim1	3.98256e-06	0.294039	0.248	0.13	0.068046
Arid5a	4.09081e-06	0.210165	0.248	0.129	0.0698956
Golgb1	4.17361e-06	0.251449	0.292	0.17	0.0713103
Tgfb1	4.18614e-06	0.251217	0.596	0.443	0.0715243
Srsf4	4.33132e-06	0.34436	0.236	0.128	0.074005
Zfp706	4.55015e-06	0.248916	0.602	0.454	0.0777438
Rbm8a	4.57586e-06	0.216208	0.565	0.418	0.0781832
Pycard	4.62525e-06	0.298006	0.634	0.478	0.0790271
Cdc37	4.63882e-06	0.21394	0.584	0.426	0.0792589
Srsf3	4.83181e-06	0.270208	0.683	0.53	0.0825562
Ankrd12	5.13466e-06	0.353521	0.385	0.25	0.0877307
B4galnt1	5.29102e-06	0.292828	0.398	0.262	0.0904024
Ctsa	5.67051e-06	0.229773	0.602	0.424	0.0968863
Cpsf6	5.97994e-06	0.281559	0.255	0.142	0.102173
Borcs8	6.03952e-06	0.275876	0.242	0.133	0.103191
Trim12a	6.10963e-06	0.261117	0.311	0.183	0.104389
Stxbp2	6.32286e-06	0.28856	0.298	0.18	0.108032
Cdc42se2	6.83054e-06	0.317016	0.435	0.303	0.116707
Iqgap1	6.83354e-06	0.200162	0.832	0.631	0.116758
Ctcf	6.85552e-06	0.279363	0.342	0.212	0.117133
Trappc4	6.90483e-06	0.247108	0.466	0.329	0.117976
Emc4	7.08549e-06	0.285258	0.366	0.242	0.121063
Pkn1	7.10092e-06	0.260378	0.366	0.237	0.121326
Mob3a	7.46695e-06	0.238799	0.205	0.104	0.12758
Acadvl	7.76628e-06	0.247225	0.242	0.135	0.132695
Ubxn6	7.82052e-06	0.250625	0.286	0.169	0.133621
Bfar	8.22359e-06	0.282029	0.28	0.166	0.140508
Fuca2	8.23861e-06	0.342464	0.311	0.197	0.140765
Atp6v1h	8.33395e-06	0.242253	0.317	0.194	0.142394
Mef2a	9.01744e-06	0.242003	0.391	0.259	0.154072
Stat2	9.03594e-06	0.288003	0.261	0.149	0.154388
Mbd3	9.52767e-06	0.399442	0.286	0.178	0.16279
Asah1	9.56221e-06	0.319292	0.491	0.363	0.16338
Mta2	1.02448e-05	0.291128	0.273	0.16	0.175043
Tle3	1.07361e-05	0.230974	0.217	0.112	0.183438
Ccdc88a	1.07942e-05	0.294728	0.398	0.269	0.18443
Tmem242	1.09174e-05	0.288831	0.242	0.139	0.186535
Arhgap5	1.10456e-05	0.3202	0.224	0.122	0.188725
Mien1	1.11515e-05	0.251755	0.516	0.389	0.190535
Ndufs3	1.18894e-05	0.273772	0.441	0.317	0.203142
Psmd11	1.20352e-05	0.287989	0.429	0.307	0.205633
Klhl6	1.2155e-05	0.201303	0.217	0.112	0.20768
Trim30d	1.25551e-05	0.332751	0.248	0.141	0.214516
Grina	1.25847e-05	0.285902	0.342	0.22	0.215022
Ybx1	1.29549e-05	0.206747	0.932	0.709	0.221347
Med28	1.33017e-05	0.2259	0.565	0.415	0.227273
Fkbp8	1.37677e-05	0.289386	0.472	0.359	0.235235
Sumo2	1.50478e-05	0.219501	0.77	0.625	0.257107
Tnfaip8	1.52029e-05	0.326836	0.453	0.327	0.259757
Ifi47	1.54849e-05	0.286887	0.292	0.169	0.264575
Stk11	1.54991e-05	0.257012	0.298	0.183	0.264818
Hadhb	1.5647e-05	0.353717	0.298	0.188	0.267345
Dpm3	1.57644e-05	0.214019	0.422	0.288	0.269351
Akap9	1.60085e-05	0.210973	0.304	0.186	0.273522
BC004004	1.68847e-05	0.300145	0.298	0.188	0.288492
Zfand6	1.98121e-05	0.258137	0.447	0.324	0.33851
Arf5	2.07088e-05	0.218941	0.77	0.62	0.35383
Necap2	2.10721e-05	0.264762	0.453	0.326	0.360037
Zcchc7	2.21124e-05	0.217729	0.267	0.152	0.377812
Use1	2.24912e-05	0.261724	0.646	0.514	0.384285
Pcbp2	2.26312e-05	0.219944	0.714	0.593	0.386676
Erp44	2.29663e-05	0.256017	0.41	0.288	0.392403
Vav1	2.39025e-05	0.236681	0.335	0.218	0.408397
Copz1	2.435e-05	0.281004	0.379	0.266	0.416045
Srsf9	2.63325e-05	0.281417	0.416	0.297	0.449918
Tomm70a	2.78121e-05	0.329216	0.286	0.18	0.475198
Ndufs5	2.90582e-05	0.249226	0.553	0.429	0.496488
Eif3g	2.93104e-05	0.213322	0.503	0.369	0.500797
Scpep1	2.95646e-05	0.386143	0.329	0.225	0.505141
Puf60	3.13395e-05	0.226931	0.385	0.26	0.535467
Myo5a	3.16704e-05	0.276279	0.286	0.178	0.54112
Vars	3.25039e-05	0.208467	0.248	0.141	0.555362
Riok1	3.33277e-05	0.226921	0.217	0.118	0.569438
Atp5b	3.42342e-05	0.200793	0.832	0.656	0.584925
Ddit3	3.60205e-05	0.203104	0.354	0.232	0.615446
Yipf3	3.65343e-05	0.237566	0.292	0.185	0.624226
Cyc1	3.816e-05	0.304146	0.453	0.34	0.652001
1700123O20Rik	3.99888e-05	0.241764	0.292	0.185	0.683248
Fam98c	4.21286e-05	0.261136	0.205	0.112	0.71981
Josd2	4.61806e-05	0.245869	0.23	0.134	0.789041
Nenf	4.6287e-05	0.282969	0.348	0.238	0.79086
Dynll1	4.63204e-05	0.211681	0.888	0.692	0.79143
Otud5	4.72815e-05	0.218945	0.23	0.132	0.807851
Trappc6a	4.7314e-05	0.29026	0.311	0.203	0.808407
Atp6v1f	4.7317e-05	0.2043	0.776	0.62	0.808459
Creld2	4.97665e-05	0.261152	0.286	0.179	0.850311
Irf9	5.19719e-05	0.263248	0.317	0.205	0.887991
Dlst	5.29174e-05	0.234243	0.236	0.137	0.904147
2410015M20Rik	5.41685e-05	0.222825	0.54	0.417	0.925522
Rnf34	5.47231e-05	0.203982	0.211	0.117	0.934999
Cnih1	5.52898e-05	0.307525	0.298	0.197	0.944681
Bbx	5.58386e-05	0.254942	0.23	0.13	0.954058
Pnrc2	5.73033e-05	0.282281	0.298	0.19	0.979085
Pla2g16	6.21887e-05	0.251942	0.311	0.196	1
Safb2	6.29172e-05	0.240987	0.342	0.231	1
Ppig	6.41545e-05	0.217286	0.503	0.372	1
Rbm38	6.46291e-05	0.208911	0.242	0.138	1
Acadl	6.52333e-05	0.40756	0.36	0.252	1
Zufsp	6.58058e-05	0.273099	0.23	0.133	1
Glod4	6.83207e-05	0.286252	0.286	0.184	1
Aga	7.15646e-05	0.267425	0.205	0.116	1
Atg5	7.19247e-05	0.245109	0.242	0.145	1
Ppp2ca	7.25015e-05	0.280675	0.528	0.406	1
Pdcd10	7.4371e-05	0.229062	0.466	0.355	1
BC017643	8.07046e-05	0.251371	0.261	0.16	1
Bin3	8.09298e-05	0.311294	0.286	0.187	1
Bcas2	8.61071e-05	0.223342	0.447	0.337	1
Bet1	8.71803e-05	0.280112	0.242	0.149	1
Bsg	9.05351e-05	0.235314	0.59	0.468	1
Dapp1	9.26573e-05	0.238795	0.286	0.181	1
Csde1	9.89711e-05	0.223521	0.509	0.399	1
Rab10	0.000117531	0.205596	0.472	0.359	1
Os9	0.000117726	0.290973	0.335	0.234	1
Ddx39b	0.00011778	0.219419	0.391	0.28	1
Limd1	0.000125375	0.255827	0.311	0.208	1
Epn1	0.000128735	0.339536	0.354	0.257	1
Rab2a	0.000130453	0.210394	0.578	0.457	1
Sdha	0.000131853	0.205887	0.391	0.282	1
Sdf4	0.000132279	0.295308	0.478	0.376	1
Ralbp1	0.000132626	0.248754	0.435	0.325	1
Hdlbp	0.000141929	0.26402	0.311	0.206	1
Wbp2	0.000142408	0.234194	0.311	0.207	1
Cpne3	0.000149293	0.352341	0.298	0.204	1
Zc3h7a	0.00015547	0.304328	0.28	0.18	1
Qdpr	0.000157227	0.215416	0.224	0.132	1
Psma4	0.000159745	0.226582	0.609	0.48	1
Rab5a	0.000159846	0.213269	0.323	0.22	1
Papola	0.000160187	0.216235	0.441	0.333	1
Cd2ap	0.000163448	0.237365	0.304	0.202	1
Pet100	0.000163557	0.265456	0.373	0.272	1
Psmc4	0.000164526	0.236888	0.398	0.294	1
Rheb	0.000166626	0.234401	0.528	0.414	1
Abhd16a	0.000167348	0.200984	0.211	0.123	1
Oser1	0.000170846	0.227979	0.323	0.215	1
Csnk1d	0.000177877	0.207242	0.298	0.194	1
Phb2	0.00018791	0.280038	0.503	0.404	1
Naxe	0.000188167	0.262949	0.311	0.217	1
Scfd1	0.000194325	0.212683	0.248	0.154	1
Emg1	0.000199269	0.224492	0.528	0.414	1
Nubp2	0.000202678	0.308351	0.255	0.167	1
Supt16	0.000202977	0.291628	0.286	0.19	1
Gas7	0.000207222	0.263308	0.217	0.127	1
Ssr3	0.000210535	0.209434	0.447	0.335	1
Wnk1	0.000211052	0.263561	0.559	0.446	1
Hnrnpk	0.000216605	0.208675	0.739	0.624	1
Csnk2b	0.000229805	0.243948	0.435	0.333	1
Zyx	0.000237203	0.269851	0.447	0.341	1
Zmat5	0.00023934	0.21525	0.304	0.207	1
Mgat2	0.000249179	0.268888	0.348	0.252	1
Tapbpl	0.000255454	0.214091	0.205	0.118	1
Swi5	0.000258043	0.24037	0.578	0.47	1
Mtch1	0.000266762	0.236623	0.304	0.209	1
Adss	0.000271886	0.244962	0.311	0.211	1
Ddrgk1	0.000296446	0.330921	0.366	0.274	1
Blmh	0.000312635	0.239402	0.23	0.144	1
Zranb2	0.000318299	0.24439	0.273	0.182	1
Napa	0.000322871	0.25114	0.373	0.277	1
Siah2	0.000331624	0.333236	0.236	0.149	1
Apbb1ip	0.000338087	0.230476	0.46	0.359	1
Eif1ad	0.000340576	0.27782	0.23	0.146	1
Dctpp1	0.000365458	0.264888	0.292	0.197	1
Kdm2a	0.000373294	0.241654	0.261	0.169	1
Atg3	0.000376346	0.230711	0.46	0.362	1
Rbck1	0.000380781	0.303035	0.28	0.191	1
Ccz1	0.000385319	0.277943	0.28	0.194	1
Rpl10-ps3	0.000386927	0.240899	0.422	0.322	1
Sema4d	0.000404632	0.267688	0.317	0.222	1
Leprotl1	0.000418291	0.215833	0.385	0.291	1
Setd2	0.00041966	0.229367	0.236	0.147	1
Tceal9	0.000428021	0.225125	0.373	0.273	1
Arl6ip4	0.000435296	0.237088	0.261	0.172	1
Trim12c	0.00044404	0.245284	0.205	0.122	1
Ptp4a2	0.000460908	0.21413	0.696	0.567	1
Rnf166	0.00048009	0.239332	0.255	0.166	1
Ncor1	0.000480974	0.249883	0.491	0.39	1
Pdia4	0.000522631	0.258176	0.286	0.195	1
Tap1	0.00053896	0.251639	0.441	0.335	1
Vapa	0.000549603	0.222738	0.54	0.445	1
Smarce1	0.00055461	0.269545	0.323	0.235	1
Cyb5b	0.000556656	0.205027	0.267	0.179	1
Atf6	0.000580062	0.227328	0.224	0.141	1
Chuk	0.00058131	0.22343	0.205	0.125	1
Rnf4	0.000593614	0.214552	0.28	0.191	1
Dnajb11	0.000598287	0.20336	0.429	0.33	1
Ghitm	0.000607947	0.308228	0.453	0.367	1
Rbm47	0.000629299	0.276147	0.217	0.136	1
Polr2m	0.000696921	0.241167	0.286	0.197	1
Skap2	0.000707068	0.243615	0.497	0.388	1
Hint2	0.000722308	0.219671	0.298	0.212	1
Mapkap1	0.000733012	0.231106	0.217	0.136	1
Gmps	0.000757455	0.200097	0.23	0.147	1
Srebf2	0.000790142	0.205628	0.267	0.178	1
Hmg20b	0.000820581	0.225829	0.255	0.172	1
Grb2	0.000827398	0.231569	0.522	0.431	1
Npm3	0.000841364	0.224689	0.404	0.315	1
Hmox2	0.000845481	0.206677	0.404	0.309	1
Sp100	0.000860672	0.242237	0.522	0.414	1
Rtf2	0.000875676	0.241165	0.373	0.292	1
Sar1b	0.000877391	0.23745	0.348	0.26	1
Clic4	0.000892594	0.224481	0.379	0.285	1
Mrpl18	0.000901915	0.201507	0.453	0.357	1
Pten	0.000907347	0.206108	0.28	0.193	1
Gmfb	0.000908813	0.220621	0.261	0.177	1
Aldh3b1	0.000949019	0.303072	0.242	0.163	1
Chtop	0.000952315	0.228872	0.261	0.176	1
Rbm26	0.000972144	0.2274	0.205	0.126	1
Hnrnpd	0.000978975	0.211939	0.422	0.325	1
Smarca4	0.000980375	0.228181	0.248	0.167	1
Man1a2	0.00104422	0.231759	0.224	0.144	1
Fam114a2	0.00105012	0.216093	0.224	0.145	1
Tmem192	0.00108201	0.216247	0.242	0.161	1
Dcp2	0.00110095	0.205096	0.211	0.134	1
Mrpl38	0.00111883	0.230492	0.205	0.129	1
Smarca5	0.00120367	0.216167	0.416	0.327	1
Ifi27l2a	0.00120538	0.307151	0.671	0.57	1
Nxf1	0.00123818	0.21884	0.286	0.2	1
Osgep	0.0012481	0.206488	0.304	0.221	1
Trmt112	0.00127884	0.201951	0.528	0.428	1
Ndufaf8	0.00128622	0.213923	0.342	0.258	1
Nudc	0.00142552	0.207783	0.41	0.324	1
Gspt1	0.00143799	0.205549	0.323	0.239	1
Tm9sf3	0.00146348	0.205566	0.379	0.296	1
Hpf1	0.00154608	0.206827	0.311	0.23	1
Snx17	0.00159929	0.209291	0.317	0.234	1
Tmem33	0.00160837	0.271156	0.28	0.204	1
Chmp1a	0.00161108	0.203454	0.292	0.212	1
Ccdc107	0.00169672	0.262296	0.217	0.144	1
Vamp3	0.00173361	0.232998	0.261	0.186	1
Aph1a	0.00180774	0.22281	0.292	0.212	1
Tmco1	0.00189014	0.208139	0.354	0.277	1
Exosc4	0.00196443	0.219896	0.205	0.134	1
Morf4l2	0.00198646	0.228349	0.391	0.311	1
Ube3a	0.00199657	0.216385	0.323	0.243	1
Srpr	0.00200795	0.245088	0.267	0.191	1
Gtf3c6	0.00204631	0.217789	0.286	0.209	1
Cuedc2	0.00217028	0.206636	0.348	0.274	1
Mrps33	0.00241644	0.24108	0.484	0.407	1
Ube2e1	0.00251187	0.228167	0.366	0.292	1
Ube2q1	0.0025427	0.204119	0.236	0.162	1
Ddx47	0.0026406	0.207622	0.217	0.147	1
Plcg2	0.00290753	0.220829	0.217	0.146	1
Tardbp	0.00316607	0.231463	0.261	0.189	1
Plbd2	0.0031788	0.248137	0.211	0.144	1
Map3k8	0.00374307	0.277366	0.298	0.222	1
Nucb1	0.00406513	0.217914	0.273	0.202	1
Commd6	0.00419993	0.211006	0.342	0.272	1
Ep400	0.00516972	0.239027	0.211	0.144	1
Grpel1	0.00521331	0.223451	0.366	0.296	1
Ergic2	0.0057241	0.200643	0.248	0.182	1
Naa38	0.00612002	0.232477	0.329	0.263	1
Dazap1	0.00619914	0.227386	0.311	0.24	1
Alg5	0.00629909	0.200316	0.255	0.188	1
Pnkd	0.00652361	0.231671	0.248	0.186	1
Colgalt1	0.00662472	0.282616	0.311	0.246	1
Map4k1	0.00673501	0.200164	0.224	0.159	1
Ndufs2	0.00822131	0.209361	0.404	0.342	1
Trappc3	0.00824035	0.223967	0.273	0.212	1
Ogfr	0.00841678	0.251877	0.292	0.231	1
Gtf3a	0.00875515	0.214425	0.23	0.169	1
Srrt	0.0105352	0.218334	0.23	0.17	1
Tcirg1	0.0120002	0.203761	0.261	0.201	1
Dnajc1	0.0126447	0.230224	0.211	0.154	1
Fgd2	0.014214	0.204075	0.248	0.183	1
Sdf2	0.0168979	0.21318	0.298	0.241	1
Tex261	0.0170491	0.22444	0.311	0.261	1
Scamp3	0.0179521	0.230198	0.224	0.171	1
Slc25a11	0.0241768	0.200052	0.335	0.29	1
Vdac1	0.0249772	0.216909	0.329	0.282	1
Idh2	0.0250917	0.207252	0.217	0.168	1
Tep1	0.026708	0.203796	0.292	0.243	1
C1qbp	0.028151	0.217295	0.323	0.275	1
Dda1	0.0345409	0.208652	0.248	0.204	1
Hsd17b12	0.0412178	0.217979	0.292	0.249	1
Commd7	0.0529936	0.220202	0.317	0.276	1
Edem1	0.0555815	0.211669	0.267	0.226	1
Usp18	0.127561	0.207343	0.217	0.181	1
Lrrc59	0.195143	0.215106	0.224	0.202	1
Hck	0.432104	0.278541	0.273	0.281	1

## Sheet: DEND3
	p_val	avg_logFC	pct.1	pct.2	p_val_adj
Fscn1	0	2.76226	0.73	0.018	0
Tmem123	0	2.70852	0.97	0.215	0
Tspan3	0	2.50606	0.893	0.155	0
Ccr7	0	2.36066	0.981	0.193	0
Tbc1d4	0	2.23029	0.877	0.06	0
Il4i1	0	2.18848	0.862	0.033	0
Marcksl1	0	2.01578	0.959	0.349	0
Rogdi	0	1.9784	0.906	0.097	0
Relb	0	1.96704	0.937	0.137	0
Traf1	0	1.91264	0.961	0.261	0
Ccl5	0	1.90081	0.78	0.192	0
Cxcl16	0	1.88564	0.938	0.268	0
Tmem176a	0	1.86483	0.871	0.212	0
Ccl22	0	1.8602	0.5	0.019	0
Il12b	0	1.85255	0.397	0.005	0
Syngr2	0	1.80593	0.961	0.397	0
Anxa3	0	1.76014	0.752	0.143	0
Socs2	0	1.74992	0.791	0.027	0
Eno3	0	1.73093	0.749	0.058	0
Zmynd15	0	1.69437	0.504	0.015	0
Serpinb6b	0	1.69426	0.605	0.059	0
Samsn1	0	1.66659	0.942	0.235	0
Cacnb3	0	1.64471	0.741	0.006	0
Spint2	0	1.62195	0.774	0.094	0
Tmem176b	0	1.60766	0.879	0.262	0
Bcl2a1b	0	1.58296	0.92	0.332	0
Iscu	0	1.53915	0.933	0.364	0
Tnfrsf4	0	1.53043	0.479	0.011	0
Psme2	0	1.51882	0.955	0.494	0
Basp1	0	1.50191	0.901	0.294	0
Ccdc88a	0	1.4795	0.817	0.253	0
Arl5c	0	1.47277	0.844	0.173	0
Etv3	0	1.45862	0.855	0.188	0
Lsp1	0	1.44129	0.992	0.613	0
Birc2	0	1.43723	0.775	0.123	0
Gadd45b	0	1.42401	0.953	0.443	0
Pcgf5	0	1.4076	0.778	0.144	0
Apol7c	0	1.32874	0.244	0.002	0
Map4k4	0	1.30509	0.814	0.194	0
Avpi1	0	1.29755	0.748	0.164	0
Serpinb9	0	1.28298	0.547	0.064	0
Clic4	0	1.26247	0.847	0.269	0
Myo1g	0	1.25388	0.855	0.255	0
Csrp1	0	1.22841	0.702	0.181	0
Nudt17	0	1.22372	0.493	0.003	0
H2-Eb2	0	1.21022	0.602	0.024	0
Bcl2a1d	0	1.19789	0.756	0.157	0
Bcl2a1a	0	1.16974	0.552	0.07	0
Lima1	0	1.15737	0.599	0.095	0
Bhlhe40	0	1.14935	0.787	0.209	0
Swap70	0	1.14648	0.762	0.192	0
H2-M2	0	1.1358	0.205	0.002	0
Mreg	0	1.10753	0.548	0.007	0
Tubb2b	0	1.06503	0.39	0.031	0
Hmgn3	0	1.03527	0.515	0.083	0
Plxnc1	0	1.02925	0.605	0.083	0
Bcl2l14	0	1.01492	0.325	0.016	0
Sdhaf1	0	1.01047	0.623	0.09	0
Net1	0	1.0027	0.482	0.065	0
Bmp2k	0	0.995207	0.64	0.135	0
Fam49a	0	0.992531	0.675	0.157	0
Lrrk1	0	0.974465	0.572	0.091	0
Poglut1	0	0.970939	0.532	0.048	0
Arl5a	0	0.951405	0.598	0.095	0
Htra2	0	0.945472	0.653	0.145	0
Tbc1d8	0	0.94518	0.556	0.076	0
Aebp2	0	0.942041	0.642	0.118	0
Nr4a3	0	0.927275	0.562	0.106	0
Lad1	0	0.923904	0.399	0.003	0
Tmcc3	0	0.916661	0.573	0.097	0
Laptm4b	0	0.893999	0.321	0.028	0
Grk3	0	0.89114	0.587	0.108	0
Tmem39a	0	0.884589	0.464	0.054	0
Nfkb2	0	0.881448	0.576	0.113	0
Ankrd33b	0	0.875403	0.444	0.036	0
Gm13546	0	0.85962	0.28	0.003	0
Gfpt1	0	0.850609	0.54	0.101	0
Map3k14	0	0.80745	0.477	0.068	0
Il2ra	0	0.806264	0.34	0.01	0
Cd200	0	0.798742	0.419	0.045	0
Fam60a	0	0.783615	0.492	0.062	0
Tnfrsf9	0	0.754457	0.336	0.017	0
Cacna1s	0	0.732372	0.313	0.031	0
Tmem158	0	0.712887	0.225	0.008	0
Il15ra	0	0.69397	0.315	0.023	0
Adora2a	0	0.693153	0.421	0.033	0
Ly75	0	0.686311	0.326	0.022	0
Slco5a1	0	0.676915	0.293	0.002	0
Slc4a8	0	0.659705	0.242	0.006	0
Strip2	0	0.64464	0.317	0.012	0
Ehf	0	0.620254	0.251	0.009	0
Tm4sf5	0	0.61656	0.201	0.007	0
Zc3h12c	0	0.582695	0.311	0.028	0
Dnah2	0	0.559676	0.208	0.003	0
Adcy6	0	0.554011	0.282	0.007	0
Foxp4	0	0.509954	0.324	0.029	0
Gatsl2	0	0.508217	0.27	0.021	0
Gca	0	0.493686	0.274	0.016	0
Vsig10	0	0.492076	0.222	0.008	0
Sh3bp4	0	0.404321	0.226	0.016	0
Id2	3.07832e-303	1.65261	0.92	0.405	5.25961e-299
Mxd1	7.0561e-303	0.869299	0.576	0.115	1.2056e-298
Cd274	1.25489e-300	0.715174	0.434	0.066	2.1441e-296
Marcks	1.90449e-297	1.21427	0.95	0.458	3.25402e-293
Gnb4	7.92586e-296	0.781567	0.311	0.035	1.35421e-291
Tmsb4x	1.82896e-292	0.977217	0.986	0.896	3.12495e-288
Gypc	7.77636e-291	0.506892	0.266	0.025	1.32867e-286
Insl6	1.08468e-289	0.630606	0.28	0.028	1.85328e-285
Papss2	1.37358e-287	0.524072	0.273	0.027	2.3469e-283
Glipr2	5.68992e-287	1.2563	0.585	0.136	9.72179e-283
Fabp5	3.44964e-285	1.53612	0.77	0.237	5.89406e-281
Gucd1	5.64221e-280	0.567199	0.355	0.047	9.64028e-276
Dok1	2.30376e-278	0.964519	0.635	0.165	3.93621e-274
Phlpp1	6.735e-277	0.531427	0.318	0.039	1.15074e-272
Pmaip1	6.55297e-275	1.04367	0.799	0.251	1.11964e-270
Pfkfb3	4.21589e-274	0.773469	0.409	0.065	7.20327e-270
Cst3	6.34117e-272	1.61019	0.975	0.616	1.08345e-267
Psmb8	3.1548e-268	1.13281	0.983	0.65	5.39029e-264
Apobec3	2.05486e-267	1.07469	0.862	0.325	3.51093e-263
Actg1	2.38154e-266	1.13104	0.993	0.807	4.0691e-262
Idi1	2.75549e-266	0.925031	0.43	0.074	4.70804e-262
Snn	3.63663e-264	0.477541	0.339	0.043	6.21355e-260
Arhgap22	1.45468e-263	0.767936	0.423	0.074	2.48547e-259
Dusp5	5.98414e-262	0.986944	0.736	0.22	1.02245e-257
Tuba1a	1.08633e-261	1.42246	0.835	0.341	1.85611e-257
Tspan33	1.80958e-261	0.617978	0.368	0.055	3.09185e-257
Sox4	4.22638e-261	0.657394	0.234	0.021	7.22119e-257
Rgs1	8.43479e-261	1.30869	0.866	0.341	1.44117e-256
Rras2	2.99461e-259	0.570259	0.42	0.069	5.11659e-255
Actn1	9.24002e-257	0.831325	0.442	0.08	1.57875e-252
Cnn2	1.95298e-256	1.14754	0.906	0.429	3.33687e-252
Cpne2	1.35177e-255	0.870352	0.46	0.092	2.30963e-251
Cd83	2.07744e-249	1.06959	0.938	0.439	3.54951e-245
Epsti1	8.29289e-249	1.83595	0.833	0.405	1.41692e-244
Selplg	4.71e-248	1.07481	0.938	0.498	8.04751e-244
H2afz	4.68684e-247	1.21959	0.982	0.674	8.00794e-243
Ptger4	3.04622e-244	0.745916	0.514	0.112	5.20478e-240
Fas	3.43918e-243	0.766922	0.412	0.073	5.87618e-239
B2m	4.35807e-240	0.898998	0.996	0.898	7.4462e-236
Rab21	1.84899e-236	0.85719	0.678	0.206	3.15918e-232
Pgap2	1.21944e-235	0.908624	0.595	0.166	2.08353e-231
Rrad	4.03242e-234	1.17107	0.528	0.123	6.8898e-230
Rel	3.19254e-232	0.973498	0.901	0.404	5.45477e-228
Adap1	1.15718e-231	0.625962	0.394	0.071	1.97716e-227
H2-Eb1	9.94023e-231	1.19745	0.968	0.517	1.69839e-226
Dnase1l3	2.50668e-230	0.610783	0.233	0.024	4.28292e-226
Rab9	5.45017e-222	0.803346	0.548	0.142	9.31216e-218
Pik3r1	6.19428e-222	0.852584	0.635	0.184	1.05835e-217
Ccser2	1.50739e-218	0.570269	0.358	0.06	2.57552e-214
Mif4gd	2.18256e-218	0.915094	0.638	0.197	3.72912e-214
H2-K1	9.23205e-218	0.913474	0.992	0.809	1.57739e-213
Stxbp3	1.45763e-217	0.827579	0.617	0.18	2.49051e-213
Cd63	3.09161e-217	1.12147	0.854	0.321	5.28232e-213
Atox1	1.29947e-216	1.01599	0.974	0.638	2.22028e-212
Rnf115	3.99808e-214	0.88145	0.663	0.218	6.83111e-210
Cd40	2.50522e-213	0.810809	0.499	0.116	4.28042e-209
Casp3	1.84738e-210	0.76648	0.481	0.115	3.15643e-206
H2-Aa	4.83954e-210	1.19091	0.955	0.522	8.26884e-206
4833407H14Rik	6.48093e-209	0.406025	0.259	0.033	1.10733e-204
H2-Q7	5.09492e-208	0.925958	0.868	0.362	8.70518e-204
Lactb	8.37432e-208	1.00366	0.628	0.203	1.43084e-203
H2-Q6	9.50086e-207	0.702295	0.601	0.159	1.62332e-202
Ogfrl1	3.06296e-205	1.02654	0.598	0.19	5.23337e-201
Cblb	3.4165e-202	0.571671	0.408	0.081	5.83743e-198
Grasp	2.61026e-201	0.806519	0.428	0.091	4.45989e-197
Nsmce3	4.79398e-199	0.994252	0.496	0.131	8.19099e-195
N4bp2l1	2.16139e-197	0.803373	0.507	0.13	3.69296e-193
Rap2b	1.27595e-196	0.92176	0.639	0.212	2.18009e-192
Gyg	2.0581e-196	1.54523	0.57	0.182	3.51647e-192
Dpp4	8.16288e-196	0.651359	0.455	0.104	1.39471e-191
Stard7	5.33969e-195	0.588355	0.405	0.085	9.12339e-191
Ptms	2.07534e-193	0.898635	0.848	0.382	3.54593e-189
Ctsh	1.83014e-192	1.02111	0.945	0.562	3.12698e-188
Gdap10	6.25243e-191	0.708437	0.384	0.078	1.06829e-186
Gpr132	6.65324e-190	0.707588	0.665	0.213	1.13677e-185
Gsto1	1.87353e-189	0.859211	0.642	0.226	3.20111e-185
Tmem131l	1.21125e-187	0.527696	0.41	0.087	2.06955e-183
Spib	2.0453e-187	0.530376	0.281	0.042	3.4946e-183
Ssh1	2.84098e-187	0.528742	0.322	0.056	4.8541e-183
Mthfd2	6.89254e-186	0.819639	0.539	0.157	1.17766e-181
Zfp36l1	8.74518e-186	0.875707	0.854	0.39	1.4942e-181
Atxn1	2.14331e-184	0.451638	0.281	0.043	3.66206e-180
Calm1	1.08274e-183	1.11408	0.99	0.827	1.84996e-179
St8sia4	2.9845e-181	0.757782	0.693	0.243	5.09931e-177
Mrpl14	3.31126e-181	0.834254	0.723	0.296	5.65762e-177
Polr3c	3.73688e-181	0.622059	0.464	0.118	6.38484e-177
Psme1	5.30051e-180	0.957959	0.92	0.557	9.05645e-176
Psmb9	3.05903e-179	0.984223	0.854	0.434	5.22666e-175
Gbp2	1.46963e-178	0.802531	0.388	0.084	2.51101e-174
Sepsecs	8.03919e-178	0.380752	0.205	0.025	1.37358e-173
Rnf19b	6.52882e-177	0.704339	0.537	0.157	1.11551e-172
Rassf2	1.47195e-176	0.625798	0.5	0.132	2.51497e-172
Herpud1	5.85166e-176	0.799988	0.726	0.272	9.99815e-172
Ass1	1.2924e-175	0.992212	0.617	0.211	2.2082e-171
Gtf2a1	1.10618e-174	0.613967	0.386	0.084	1.89002e-170
Rftn1	2.33094e-173	0.683577	0.539	0.158	3.98264e-169
Stx11	1.23646e-172	0.558725	0.386	0.084	2.11262e-168
Arf4	2.42331e-172	0.855249	0.864	0.451	4.14048e-168
H2-D1	4.43447e-170	0.696801	0.992	0.88	7.57674e-166
Tmem19	6.0818e-170	0.664278	0.388	0.09	1.03914e-165
Ostf1	1.1983e-169	0.914873	0.935	0.601	2.04742e-165
Tank	4.32287e-169	0.65209	0.572	0.179	7.38606e-165
Flt3	4.47991e-169	0.618721	0.428	0.102	7.65437e-165
Il21r	1.53039e-168	0.512366	0.384	0.081	2.61482e-164
Tes	1.60685e-168	0.677428	0.523	0.151	2.74547e-164
Arl4c	2.24364e-165	0.761005	0.653	0.24	3.83349e-161
Dynll2	6.60824e-165	0.799943	0.551	0.18	1.12908e-160
Nostrin	1.09359e-164	0.712	0.343	0.074	1.86851e-160
Uap1	9.69843e-164	0.875919	0.437	0.116	1.65707e-159
Phf11b	1.96109e-163	0.92101	0.72	0.296	3.35072e-159
Jak2	7.5888e-161	0.644961	0.428	0.108	1.29662e-156
AW112010	1.08508e-160	1.29131	0.711	0.31	1.85396e-156
Fam32a	3.63339e-160	0.886074	0.711	0.306	6.20802e-156
Csf2rb	2.28131e-159	0.742015	0.567	0.191	3.89785e-155
Triobp	2.58526e-159	0.625894	0.438	0.116	4.41718e-155
Gnl2	1.13614e-158	0.832488	0.368	0.086	1.94121e-154
Rcsd1	1.80506e-157	0.646369	0.537	0.163	3.08412e-153
Nfkbib	6.0667e-157	0.702662	0.629	0.233	1.03656e-152
Nfkbia	2.25643e-155	0.837817	0.967	0.655	3.85534e-151
Palld	5.63138e-155	0.398333	0.227	0.034	9.62178e-151
Nudt9	8.26958e-155	0.925106	0.51	0.168	1.41294e-150
Rala	1.24642e-153	0.832476	0.789	0.377	2.12964e-149
Mvp	3.13515e-151	0.745983	0.618	0.237	5.35672e-147
Tpm1	5.74379e-151	0.562892	0.471	0.136	9.81385e-147
Ift57	6.71956e-151	0.495964	0.28	0.052	1.1481e-146
Frmd4a	6.85722e-151	0.566581	0.376	0.091	1.17162e-146
Itgb1	3.81776e-150	0.706182	0.822	0.398	6.52303e-146
Gpr137b	3.87193e-150	0.796315	0.573	0.201	6.61558e-146
Tctex1d2	6.22392e-147	0.977387	0.548	0.198	1.06342e-142
Cdc42ep3	1.28972e-146	0.724754	0.466	0.136	2.20362e-142
Pde4b	1.31492e-145	0.619913	0.577	0.188	2.24667e-141
Stat4	2.43822e-145	0.512029	0.293	0.056	4.16594e-141
Atmin	3.56736e-145	0.426358	0.274	0.051	6.0952e-141
Sub1	2.18645e-144	0.790876	0.978	0.732	3.73577e-140
Wnk1	2.46368e-144	0.8678	0.818	0.436	4.20945e-140
Tapbpl	5.26885e-144	0.580167	0.415	0.11	9.00236e-140
Sqstm1	1.03562e-143	0.849875	0.777	0.381	1.76946e-139
Clptm1	2.20565e-143	0.643007	0.541	0.185	3.76857e-139
Cd74	4.79335e-143	0.818659	0.964	0.546	8.18992e-139
Pmvk	1.39704e-142	0.643418	0.453	0.134	2.38698e-138
Anxa4	7.82326e-142	0.774336	0.64	0.252	1.33668e-137
Traf2	1.16753e-141	0.469691	0.342	0.078	1.99483e-137
Nuak2	1.24756e-141	0.665745	0.479	0.148	2.13159e-137
Nampt	2.87828e-141	0.848153	0.588	0.228	4.91783e-137
Icam1	1.03238e-140	0.655701	0.704	0.29	1.76392e-136
Cflar	1.11564e-139	0.666183	0.642	0.248	1.90618e-135
Polb	7.11132e-139	0.664842	0.518	0.175	1.21504e-134
Phf11a	1.03454e-137	0.682861	0.413	0.117	1.76762e-133
Cd80	1.27758e-137	0.541833	0.278	0.056	2.18287e-133
Crip1	1.36e-137	0.874576	0.957	0.703	2.3237e-133
Edf1	7.52936e-137	0.725297	0.908	0.554	1.28647e-132
Lpcat1	1.13133e-136	0.532994	0.399	0.107	1.933e-132
Vopp1	1.69164e-136	0.399915	0.229	0.038	2.89034e-132
Itga4	4.24242e-134	0.666641	0.667	0.267	7.2486e-130
Rps27l	2.16001e-132	1.06432	0.917	0.582	3.69059e-128
Sri	1.09538e-131	0.721708	0.86	0.504	1.87156e-127
Birc3	1.43946e-131	0.555472	0.525	0.172	2.45947e-127
Rap2a	8.82912e-131	0.48971	0.383	0.104	1.50854e-126
Ddhd1	4.09239e-130	0.509727	0.348	0.086	6.99226e-126
Zfand6	3.6489e-128	0.743919	0.686	0.315	6.23451e-124
Uvrag	7.9888e-127	0.640302	0.572	0.217	1.36497e-122
Rassf3	1.23187e-126	0.486657	0.428	0.124	2.10478e-122
Nrip1	5.85285e-126	0.585621	0.438	0.13	1.00002e-121
Cyba	1.39327e-125	0.673327	0.985	0.762	2.38055e-121
Asap1	1.40253e-125	0.636315	0.625	0.253	2.39636e-121
Dnajc12	1.17694e-123	0.416323	0.209	0.036	2.01092e-119
Cbfa2t3	2.703e-123	0.654474	0.554	0.2	4.61835e-119
Batf3	2.22169e-122	0.739407	0.507	0.183	3.79597e-118
Mob3a	3.60267e-122	0.44989	0.362	0.097	6.15551e-118
Tnfrsf11a	4.75422e-122	0.477485	0.317	0.078	8.12307e-118
Hivep1	7.23682e-122	0.418593	0.278	0.059	1.23648e-117
Icosl	1.13128e-120	0.455099	0.264	0.055	1.93291e-116
Rasa2	6.04595e-119	0.468848	0.328	0.081	1.03301e-114
Prex1	8.76522e-119	0.529292	0.521	0.183	1.49763e-114
Fnbp1l	3.13831e-118	0.454997	0.285	0.065	5.36212e-114
Galnt12	5.96487e-118	0.367976	0.208	0.036	1.01916e-113
AA467197	4.17462e-117	0.642989	0.234	0.045	7.13275e-113
Mvd	1.08905e-116	0.467357	0.248	0.051	1.86075e-112
Btg1	6.89052e-116	0.545446	0.964	0.757	1.17731e-111
Nfkbie	7.62559e-116	0.482017	0.394	0.116	1.30291e-111
Micu1	2.46162e-115	0.478104	0.357	0.099	4.20592e-111
Grb2	1.98961e-114	0.707544	0.777	0.422	3.39945e-110
Wdr91	2.97579e-113	0.63556	0.387	0.119	5.08443e-109
Pnpla8	9.06277e-113	0.448796	0.417	0.128	1.54846e-108
Nectin1	1.31287e-111	0.353674	0.211	0.039	2.24316e-107
Atxn7l1	1.77133e-111	0.460213	0.35	0.097	3.02649e-107
Haus8	1.59343e-110	0.665012	0.453	0.159	2.72254e-106
Med11	1.14186e-109	0.508552	0.369	0.109	1.95098e-105
Tap1	1.857e-109	0.645966	0.685	0.325	3.17286e-105
Coro1b	4.11077e-109	0.693036	0.725	0.375	7.02367e-105
Mcemp1	6.59072e-109	0.551279	0.371	0.105	1.12609e-104
Ncoa7	3.1632e-108	0.908053	0.41	0.138	5.40465e-104
Alkbh6	6.78389e-108	0.430362	0.3	0.077	1.15909e-103
Gngt2	1.84307e-107	0.867068	0.709	0.359	3.14907e-103
Cytip	2.01738e-107	0.649395	0.81	0.429	3.44689e-103
Kcnk6	2.37382e-106	0.309526	0.207	0.039	4.05591e-102
Ppp4r2	4.93394e-105	0.537471	0.494	0.185	8.43013e-101
Mtmr4	8.14307e-105	0.411793	0.234	0.05	1.39132e-100
Rgs3	1.36621e-104	0.488967	0.332	0.093	2.3343e-100
Psme2b	1.83777e-104	0.463639	0.391	0.123	3.14002e-100
Gabarap	7.73952e-103	0.58086	0.95	0.674	1.32237e-98
Stat1	2.58041e-102	0.646148	0.643	0.298	4.40889e-98
Ghitm	2.93405e-102	0.669168	0.689	0.359	5.01311e-98
Fam129a	3.31323e-102	0.59913	0.466	0.172	5.66098e-98
Actb	6.31885e-101	0.755279	0.931	0.694	1.07964e-96
Pvr	7.12062e-101	0.418908	0.304	0.081	1.21663e-96
Ahcyl2	9.71661e-101	0.509499	0.42	0.143	1.66018e-96
Ric1	2.18496e-100	0.307442	0.202	0.039	3.73322e-96
Vamp8	3.48947e-100	0.721405	0.873	0.583	5.96211e-96
Ktn1	1.31332e-98	0.502804	0.384	0.121	2.24395e-94
Cyp51	7.02896e-98	0.482914	0.303	0.082	1.20097e-93
Stk4	5.1563e-97	0.451254	0.521	0.202	8.81005e-93
Tubb5	6.0285e-97	0.616461	0.82	0.474	1.03003e-92
H3f3a	1.44538e-96	0.485914	0.978	0.852	2.46958e-92
Zfc3h1	2.09815e-96	0.428481	0.273	0.069	3.58491e-92
Supt4a	2.25065e-95	0.553217	0.814	0.477	3.84545e-91
Stat5a	2.59836e-95	0.411866	0.282	0.074	4.43956e-91
Appl1	1.4789e-94	0.468366	0.398	0.135	2.52684e-90
Slc25a10	2.27493e-94	0.328447	0.209	0.045	3.88694e-90
Plekhb2	3.93899e-94	0.485734	0.43	0.157	6.73017e-90
Rora	8.56917e-94	0.368361	0.216	0.046	1.46413e-89
Pim1	1.28648e-93	0.565473	0.89	0.546	2.19808e-89
Krcc1	2.63234e-93	0.541758	0.664	0.326	4.49761e-89
Tbc1d10a	4.28612e-93	0.374184	0.281	0.074	7.32326e-89
Tap2	8.88168e-93	0.545722	0.579	0.259	1.51752e-88
Tapbp	1.37603e-92	0.568547	0.775	0.427	2.35108e-88
Psmg4	1.61121e-92	0.632612	0.572	0.262	2.75292e-88
Tnni2	1.09165e-90	0.612724	0.423	0.153	1.86519e-86
Nfe2l1	1.20962e-90	0.388217	0.329	0.099	2.06676e-86
Spred1	1.4789e-90	0.522145	0.322	0.097	2.52685e-86
Nav1	2.58266e-90	0.545786	0.386	0.135	4.41273e-86
Arhgap30	4.95778e-90	0.514197	0.725	0.381	8.47087e-86
Emd	8.02875e-90	0.462371	0.581	0.261	1.37179e-85
Snx20	2.18686e-89	0.565943	0.672	0.341	3.73647e-85
Thap2	4.10915e-89	0.402686	0.245	0.061	7.0209e-85
Sumo2	5.70588e-89	0.556646	0.912	0.617	9.74907e-85
Cers6	6.78554e-89	0.454541	0.342	0.108	1.15938e-84
Rab11fip1	2.67096e-88	0.398679	0.317	0.094	4.5636e-84
4930523C07Rik	4.39391e-88	0.412922	0.647	0.285	7.50744e-84
Trim35	1.22445e-87	0.559365	0.47	0.182	2.0921e-83
Filip1l	1.31412e-87	0.575016	0.492	0.196	2.24531e-83
Lamp1	1.33157e-87	0.46297	0.926	0.539	2.27512e-83
Ikbkb	2.16671e-87	0.505619	0.638	0.306	3.70204e-83
Mllt6	3.18513e-87	0.284362	0.236	0.055	5.44211e-83
Fchsd2	4.7588e-87	0.343984	0.395	0.13	8.13088e-83
Ube2l6	1.18033e-86	0.473204	0.555	0.242	2.01671e-82
Gramd3	3.13148e-86	0.367806	0.348	0.108	5.35045e-82
Tnfrsf1b	4.02392e-86	0.493353	0.5	0.204	6.87527e-82
Ppfibp2	4.29649e-85	0.474426	0.315	0.099	7.34098e-81
Tbc1d15	7.54894e-85	0.379959	0.364	0.122	1.28981e-80
Nfat5	2.3261e-84	0.378997	0.358	0.116	3.97438e-80
Myl6	7.15413e-84	0.522941	0.982	0.809	1.22235e-79
Etv6	7.88068e-84	0.435022	0.329	0.105	1.34649e-79
Mthfsl	6.09284e-83	0.417281	0.41	0.152	1.04102e-78
Paxbp1	7.22196e-83	0.391019	0.322	0.101	1.23394e-78
Spr	1.36905e-82	0.505015	0.428	0.171	2.33915e-78
Rbpms	1.24302e-81	0.391516	0.267	0.073	2.12382e-77
Nabp1	5.26677e-81	0.541247	0.464	0.191	8.9988e-77
Atpif1	2.21943e-80	0.546559	0.866	0.539	3.79211e-76
Vrk2	8.8383e-80	0.447496	0.364	0.131	1.51011e-75
Pfn1	9.7289e-80	0.491201	0.988	0.846	1.66228e-75
Rnf181	2.18434e-79	0.387012	0.321	0.104	3.73216e-75
Gclc	2.85429e-79	0.624475	0.242	0.065	4.87684e-75
Tagln2	3.85904e-79	0.857144	0.862	0.597	6.59355e-75
Kpna3	6.33071e-79	0.400412	0.309	0.098	1.08167e-74
Fnbp1	1.1355e-78	0.526146	0.483	0.209	1.94011e-74
Rtn4	2.27286e-78	0.515728	0.826	0.497	3.88341e-74
Hmg20b	2.3783e-78	0.437109	0.42	0.165	4.06356e-74
S100a4	2.44791e-78	0.622935	0.77	0.429	4.18251e-74
Rabgap1l	8.5461e-78	0.256878	0.365	0.119	1.46019e-73
Anxa2	1.40192e-77	0.610541	0.877	0.545	2.39533e-73
Necap2	3.02665e-77	0.479553	0.624	0.318	5.17133e-73
Asl	4.09828e-77	0.44606	0.375	0.14	7.00232e-73
Fbrsl1	1.27149e-76	0.351968	0.258	0.073	2.17247e-72
3110043O21Rik	1.62668e-76	0.338343	0.219	0.056	2.77934e-72
Skil	2.68704e-76	0.44882	0.472	0.196	4.59107e-72
Pigyl	3.38591e-76	0.43495	0.362	0.133	5.78516e-72
Nub1	4.03958e-76	0.37056	0.368	0.132	6.90203e-72
Tmem168	6.81465e-76	0.370418	0.317	0.104	1.16435e-71
Prr14	7.27735e-76	0.39174	0.336	0.113	1.24341e-71
Plscr1	8.05138e-76	0.49839	0.256	0.075	1.37566e-71
Ak2	1.26314e-75	0.486666	0.534	0.251	2.1582e-71
P2ry10	1.3278e-75	0.328024	0.39	0.136	2.26867e-71
Klf6	1.43312e-75	0.583021	0.93	0.678	2.44862e-71
Pex13	2.04684e-75	0.36559	0.314	0.103	3.49722e-71
Rhog	4.4612e-75	0.503159	0.598	0.309	7.62241e-71
H2-T23	2.43025e-74	0.507981	0.876	0.576	4.15233e-70
Il15	2.82931e-74	0.404228	0.247	0.07	4.83416e-70
Prpf38b	3.49219e-74	0.470994	0.639	0.326	5.96675e-70
Smarce1	1.29989e-73	0.465341	0.5	0.228	2.22099e-69
Pex16	1.97233e-73	0.370761	0.284	0.089	3.36992e-69
Malat1	2.21005e-73	0.57591	0.986	0.913	3.7761e-69
Fam53b	3.14299e-73	0.385406	0.298	0.094	5.37011e-69
Mx1	7.42582e-73	0.465755	0.311	0.104	1.26878e-68
Pold1	1.22464e-72	0.39699	0.225	0.06	2.09242e-68
Itm2c	1.95292e-72	0.523699	0.664	0.364	3.33675e-68
Rest	1.21334e-71	0.423385	0.375	0.141	2.07312e-67
Wdr1	2.52375e-71	0.462304	0.733	0.421	4.31207e-67
Ftl1	3.43837e-71	0.397033	0.963	0.725	5.8748e-67
Rasa4	5.17509e-71	0.401488	0.332	0.118	8.84216e-67
Specc1	8.1778e-71	0.465659	0.273	0.087	1.39726e-66
Nlrc5	9.7812e-71	0.304113	0.231	0.063	1.67122e-66
Nhlrc2	1.63402e-70	0.29543	0.215	0.057	2.79188e-66
Stat3	1.6648e-70	0.413761	0.631	0.314	2.84447e-66
Gpcpd1	1.46811e-69	0.473119	0.514	0.231	2.50842e-65
Dnajc10	4.34365e-69	0.341161	0.304	0.103	7.42157e-65
H2-DMb2	4.82178e-69	0.385029	0.51	0.215	8.23849e-65
Hmgcs1	6.14244e-69	0.538865	0.295	0.099	1.0495e-64
Zmiz2	7.55882e-69	0.351653	0.36	0.134	1.2915e-64
Trafd1	1.3467e-68	0.452437	0.511	0.241	2.30097e-64
Lmo4	1.40591e-68	0.507779	0.431	0.185	2.40214e-64
Rab8b	3.09326e-68	0.504678	0.474	0.22	5.28514e-64
Mfhas1	4.07297e-68	0.296426	0.238	0.069	6.95908e-64
Sbf2	1.12279e-67	0.369222	0.22	0.061	1.91839e-63
Ubxn2a	1.70679e-67	0.350494	0.281	0.092	2.91622e-63
Lrrc8c	2.63011e-67	0.32452	0.311	0.106	4.49381e-63
Hmgcr	3.28486e-67	0.391006	0.28	0.09	5.6125e-63
Brk1	4.4799e-67	0.501579	0.817	0.545	7.65435e-63
Fam96b	5.51063e-67	0.40063	0.547	0.271	9.41547e-63
Synj1	6.71021e-67	0.476689	0.467	0.21	1.14651e-62
Rab8a	2.47304e-66	0.42085	0.594	0.308	4.22544e-62
Ctnna1	2.69428e-66	0.449763	0.45	0.202	4.60344e-62
Slc2a6	7.05117e-66	0.32781	0.211	0.057	1.20476e-61
Vcp	1.38869e-65	0.508143	0.69	0.409	2.37271e-61
Hint3	1.80009e-65	0.361216	0.358	0.139	3.07564e-61
Spop	2.16136e-65	0.471766	0.61	0.334	3.6929e-61
Colgalt1	2.98677e-65	0.514035	0.49	0.239	5.10319e-61
Cd47	2.10406e-64	0.463992	0.887	0.637	3.595e-60
Efhd2	8.76809e-64	0.443364	0.837	0.518	1.49812e-59
Tpm4	1.17631e-63	0.437643	0.775	0.463	2.00985e-59
M6pr	1.91984e-63	0.442385	0.705	0.412	3.28024e-59
H2-Ab1	3.98937e-63	0.694921	0.782	0.531	6.81624e-59
Ddt	1.22284e-62	0.676044	0.39	0.167	2.08935e-58
Gpx4	1.22822e-62	0.567787	0.862	0.582	2.09854e-58
Tnfrsf18	1.45052e-61	0.382013	0.258	0.082	2.47836e-57
Ube2e3	2.24376e-61	0.412721	0.477	0.229	3.83369e-57
B4galnt1	3.31679e-61	0.387622	0.526	0.255	5.66706e-57
Slamf7	4.26427e-61	0.451146	0.572	0.299	7.28592e-57
Polr2e	1.17621e-60	0.508196	0.592	0.331	2.00967e-56
Sowahc	1.91111e-60	0.37034	0.296	0.105	3.26533e-56
Prcp	8.17366e-60	0.459127	0.617	0.343	1.39655e-55
Prr13	2.09781e-59	0.437932	0.764	0.476	3.58431e-55
Malt1	2.4045e-59	0.354286	0.47	0.208	4.10833e-55
Ldlr	3.51516e-59	0.391153	0.346	0.134	6.00601e-55
Glipr1	4.14908e-59	0.482505	0.632	0.346	7.08911e-55
Npc2	7.10297e-59	0.617795	0.904	0.675	1.21361e-54
Kdm2b	1.13821e-58	0.327243	0.306	0.112	1.94474e-54
Dapp1	2.86739e-58	0.343851	0.405	0.175	4.89922e-54
Vhl	4.13531e-58	0.284015	0.225	0.069	7.06559e-54
Klrk1	4.28687e-58	0.341376	0.387	0.16	7.32455e-54
Fut8	6.20891e-58	0.26548	0.201	0.057	1.06085e-53
Got1	1.24631e-57	0.419266	0.405	0.182	2.12944e-53
Yif1b	1.27189e-57	0.380338	0.457	0.222	2.17316e-53
Dnm1l	1.45654e-57	0.326783	0.28	0.099	2.48865e-53
Mkl1	3.05144e-57	0.318008	0.227	0.071	5.21369e-53
Sgpl1	1.36294e-56	0.441293	0.427	0.2	2.32872e-52
Txndc17	1.74892e-56	0.799965	0.749	0.478	2.98821e-52
Med10	2.10916e-56	0.429586	0.497	0.253	3.60372e-52
Pfdn5	2.35247e-56	0.400814	0.959	0.789	4.01943e-52
Emc8	2.98808e-56	0.413486	0.377	0.167	5.10543e-52
Mmd	3.54561e-56	0.349386	0.215	0.067	6.05803e-52
H1f0	3.57286e-56	0.508339	0.372	0.161	6.10459e-52
Apool	5.41552e-56	0.335733	0.259	0.09	9.25295e-52
Manbal	9.28689e-56	0.363845	0.34	0.139	1.58676e-51
Ensa	3.22821e-55	0.370192	0.467	0.228	5.51572e-51
Tubb2a	4.18917e-55	0.492748	0.541	0.289	7.15762e-51
Calm3	4.98867e-55	0.452986	0.767	0.475	8.52365e-51
Ifrd1	5.10506e-55	0.338711	0.725	0.415	8.7225e-51
Ube2l3	5.40923e-55	0.420765	0.76	0.473	9.24221e-51
Sh3bp1	8.10639e-55	0.368111	0.342	0.141	1.38506e-50
Pgls	8.30394e-55	0.450859	0.713	0.443	1.41881e-50
Aftph	1.06791e-54	0.338694	0.386	0.169	1.82462e-50
H2-T22	1.19481e-54	0.433584	0.617	0.356	2.04145e-50
Slc6a6	1.32856e-54	0.396822	0.62	0.351	2.26998e-50
Tax1bp3	2.2804e-54	0.36411	0.355	0.152	3.89629e-50
Adam8	3.19161e-54	0.395007	0.448	0.213	5.45319e-50
Txn1	5.25621e-54	0.51226	0.879	0.623	8.98076e-50
Lrrc58	5.72424e-54	0.363138	0.536	0.283	9.78044e-50
Usp18	6.21124e-54	0.350484	0.398	0.175	1.06125e-49
Rnf114	8.80141e-54	0.405023	0.461	0.225	1.50381e-49
Mrpl38	9.68973e-54	0.44521	0.309	0.124	1.65559e-49
Plgrkt	2.6621e-53	0.462193	0.51	0.267	4.54847e-49
Sh3glb1	3.80887e-53	0.397484	0.842	0.561	6.50783e-49
Dnajc8	3.9405e-53	0.399328	0.709	0.438	6.73275e-49
Akap13	6.12307e-53	0.306601	0.702	0.4	1.04619e-48
S100a11	7.19109e-53	0.27762	0.906	0.646	1.22867e-48
Mrps6	1.42077e-52	0.384459	0.291	0.112	2.42753e-48
Ptcd2	2.93454e-52	0.334418	0.298	0.118	5.01395e-48
Ifi209	4.86695e-52	0.309348	0.53	0.268	8.31567e-48
Dstn	5.15534e-52	0.50226	0.511	0.273	8.80841e-48
Acadl	7.10559e-52	0.497197	0.477	0.246	1.21406e-47
Sav1	1.96104e-51	0.254748	0.233	0.078	3.35063e-47
Psmb7	2.03584e-51	0.390446	0.702	0.424	3.47843e-47
Rassf4	2.53712e-51	0.429718	0.576	0.317	4.33492e-47
Ptpn2	4.01749e-51	0.286657	0.36	0.153	6.86428e-47
Pcyt1a	1.80114e-50	0.465109	0.288	0.114	3.07743e-46
Dusp11	1.83635e-50	0.326492	0.519	0.273	3.13758e-46
Arhgap31	2.74097e-50	0.48992	0.329	0.136	4.68323e-46
Ccni	4.40713e-50	0.320138	0.395	0.179	7.53003e-46
Tbc1d1	5.23238e-50	0.309563	0.311	0.125	8.94004e-46
Ggta1	5.64564e-50	0.310925	0.241	0.084	9.64613e-46
Slc3a2	1.01663e-49	0.40495	0.76	0.485	1.73701e-45
Pde6d	1.50071e-49	0.338421	0.296	0.12	2.56412e-45
Sdf4	1.54093e-49	0.348754	0.635	0.369	2.63284e-45
Zfp524	1.87785e-49	0.266304	0.202	0.064	3.20849e-45
Cop1	1.9432e-49	0.30339	0.321	0.133	3.32015e-45
Ube2f	2.4821e-49	0.338889	0.501	0.264	4.24091e-45
Eif4e2	2.5261e-49	0.361047	0.529	0.285	4.3161e-45
Eif4a2	2.65852e-49	0.40053	0.707	0.447	4.54235e-45
Pdlim4	4.49407e-49	0.462118	0.266	0.103	7.67857e-45
Arpp19	7.88924e-49	0.32	0.766	0.487	1.34796e-44
Ppp1r15a	8.17078e-49	0.335599	0.741	0.468	1.39606e-44
Renbp	3.08541e-48	0.370414	0.357	0.159	5.27173e-44
Dennd4a	3.88885e-48	0.254561	0.679	0.376	6.64449e-44
Ncf1	5.56019e-48	0.323595	0.444	0.222	9.50014e-44
2022-03-05	5.87784e-47	0.375469	0.468	0.248	1.00429e-42
Zdhhc3	1.01722e-46	0.299796	0.26	0.1	1.73802e-42
Tmem51	1.15153e-46	0.389496	0.399	0.195	1.9675e-42
Mthfs	1.16237e-46	0.332171	0.295	0.121	1.98603e-42
Ctsz	1.96949e-46	0.345938	0.871	0.574	3.36507e-42
Bmt2	2.63474e-46	0.296974	0.281	0.11	4.50171e-42
Ncoa2	3.02054e-46	0.238473	0.237	0.084	5.16089e-42
Ube2i	5.83393e-46	0.310451	0.708	0.441	9.96785e-42
Rela	9.143e-46	0.286534	0.348	0.155	1.56217e-41
Tbca	9.86165e-46	0.375764	0.803	0.552	1.68496e-41
Ucp2	1.23703e-45	0.412619	0.844	0.573	2.11359e-41
Peli1	1.4007e-45	0.282846	0.528	0.283	2.39323e-41
Dctn2	1.67915e-45	0.321147	0.467	0.245	2.869e-41
Eva1b	2.62012e-45	0.316255	0.251	0.094	4.47674e-41
Nubp1	3.88036e-45	0.50971	0.439	0.233	6.62999e-41
Srgn	9.86572e-45	0.288896	0.938	0.776	1.68566e-40
Mlf2	1.46306e-44	0.451473	0.532	0.308	2.49978e-40
Foxn2	1.50612e-44	0.249597	0.253	0.096	2.57335e-40
Parp8	1.7248e-44	0.327726	0.269	0.107	2.94699e-40
Dnajc5	2.04496e-44	0.353582	0.421	0.213	3.49402e-40
Dnajb6	2.20358e-44	0.36455	0.609	0.369	3.76504e-40
Selenok	2.31077e-44	0.399302	0.86	0.653	3.94818e-40
Phyh	2.32151e-44	0.294244	0.35	0.159	3.96652e-40
Mapre2	3.3656e-44	0.321399	0.337	0.154	5.75046e-40
Bcat2	4.29808e-44	0.307343	0.282	0.117	7.3437e-40
Galnt1	4.45433e-44	0.317165	0.35	0.159	7.61067e-40
Mrpl45	6.0749e-44	0.281896	0.28	0.115	1.03796e-39
Fdps	8.01109e-44	0.330083	0.252	0.097	1.36877e-39
Ncoa4	8.73275e-44	0.321914	0.358	0.166	1.49208e-39
Rab22a	1.05605e-43	0.284512	0.324	0.142	1.80436e-39
H2-Q4	3.23629e-43	0.275386	0.357	0.159	5.52952e-39
Gosr2	4.84274e-43	0.312112	0.326	0.146	8.2743e-39
Trps1	1.54781e-42	0.273354	0.387	0.184	2.64458e-38
Cep350	1.82921e-42	0.230188	0.229	0.084	3.12538e-38
Arhgdia	5.73185e-42	0.311988	0.826	0.544	9.79345e-38
Clec2d	6.8384e-42	0.233124	0.351	0.156	1.16841e-37
Pik3r5	7.79997e-42	0.261507	0.296	0.126	1.3327e-37
Tbcb	1.17239e-41	0.302705	0.643	0.387	2.00315e-37
Fam46c	1.5411e-41	0.266484	0.332	0.147	2.63312e-37
Sp140	4.13036e-41	0.441299	0.434	0.232	7.05714e-37
Rbm17	7.62517e-41	0.318242	0.496	0.277	1.30284e-36
Cox5a	7.95353e-41	0.352266	0.883	0.615	1.35894e-36
Ppdpf	3.56087e-40	0.377723	0.534	0.31	6.08411e-36
Nfil3	3.58112e-40	0.32825	0.298	0.13	6.1187e-36
Scpep1	4.05234e-40	0.325205	0.42	0.22	6.92383e-36
Myl12a	6.09815e-40	0.350729	0.901	0.659	1.04193e-35
Rtraf	7.35192e-40	0.33853	0.753	0.491	1.25615e-35
Gpd2	1.58691e-39	0.272281	0.241	0.094	2.71139e-35
D17Wsu92e	2.44517e-39	0.306414	0.328	0.153	4.17782e-35
Rbbp8	4.55442e-39	0.314175	0.264	0.112	7.78169e-35
Spi1	8.14877e-39	0.274571	0.825	0.527	1.3923e-34
Sumo1	1.33832e-38	0.289374	0.726	0.475	2.28665e-34
Rgs10	1.68945e-38	0.455998	0.73	0.474	2.88659e-34
Rps19	2.63682e-38	0.237981	0.992	0.896	4.50526e-34
Psmd7	4.03355e-38	0.298205	0.554	0.326	6.89172e-34
Gnai3	4.37073e-38	0.240286	0.391	0.196	7.46784e-34
Nck1	4.47076e-38	0.231225	0.248	0.1	7.63875e-34
Slc25a19	6.70181e-38	0.251704	0.212	0.08	1.14507e-33
Bri3	8.91624e-38	0.267428	0.843	0.549	1.52343e-33
Plin3	9.27722e-38	0.293532	0.318	0.152	1.58511e-33
Ifngr2	1.23183e-37	0.278861	0.51	0.286	2.1047e-33
Mrps7	1.87185e-37	0.337811	0.373	0.193	3.19825e-33
Gnb1	1.91318e-37	0.264264	0.694	0.438	3.26887e-33
Ttyh3	2.83895e-37	0.313916	0.236	0.095	4.85063e-33
Psma5	3.8789e-37	0.320868	0.657	0.424	6.6275e-33
Ly9	5.61585e-37	0.728852	0.351	0.188	9.59525e-33
Snd1	5.63408e-37	0.244973	0.262	0.112	9.62639e-33
Plxnd1	1.10169e-36	0.281005	0.218	0.086	1.88234e-32
Sugt1	1.69019e-36	0.309857	0.528	0.315	2.88786e-32
Gm17056	1.96515e-36	0.302804	0.204	0.077	3.35766e-32
Iah1	2.30082e-36	0.310077	0.387	0.204	3.93119e-32
Phf21a	3.19972e-36	0.295985	0.222	0.086	5.46704e-32
Suds3	4.14694e-36	0.265432	0.379	0.195	7.08546e-32
Psma1	4.71072e-36	0.281011	0.733	0.474	8.04873e-32
Erlin1	8.0461e-36	0.294251	0.256	0.112	1.37476e-31
Gpr183	9.03229e-36	0.294092	0.357	0.175	1.54326e-31
Cmc2	1.92877e-35	0.35256	0.248	0.107	3.2955e-31
Slc26a2	2.57018e-35	0.248835	0.209	0.081	4.39141e-31
Eloc	3.85657e-35	0.321522	0.685	0.457	6.58933e-31
Pirb	4.54926e-35	0.289617	0.521	0.306	7.77287e-31
Sbno1	1.04397e-34	0.202981	0.449	0.245	1.78373e-30
Ccnd2	1.14691e-34	0.3348	0.441	0.235	1.95961e-30
Scamp2	1.53908e-34	0.302819	0.439	0.249	2.62968e-30
Psmd4	2.07466e-34	0.248169	0.632	0.401	3.54477e-30
Herc6	2.61459e-34	0.259454	0.231	0.095	4.46728e-30
Gdi1	5.44469e-34	0.203844	0.225	0.09	9.30279e-30
Ier5	7.4501e-34	0.281738	0.861	0.62	1.27292e-29
Mpc1	8.67226e-34	0.2604	0.663	0.419	1.48174e-29
Msmo1	9.03207e-34	0.315209	0.244	0.105	1.54322e-29
Zdhhc6	9.58111e-34	0.281468	0.211	0.086	1.63703e-29
Psma7	1.11454e-33	0.27761	0.858	0.593	1.9043e-29
Mbtd1	1.1696e-33	0.240047	0.285	0.129	1.99838e-29
Shtn1	1.47753e-33	0.291416	0.314	0.155	2.52451e-29
Pla2g16	1.69433e-33	0.497167	0.358	0.192	2.89494e-29
Ythdf2	1.87623e-33	0.249502	0.339	0.169	3.20573e-29
Bcl7c	1.91366e-33	0.219833	0.34	0.17	3.26969e-29
Bri3bp	3.17689e-33	0.26612	0.314	0.15	5.42803e-29
Bcl3	3.97952e-33	0.217847	0.219	0.088	6.79941e-29
Ubxn1	8.76988e-33	0.235415	0.646	0.412	1.49842e-28
Coq10b	1.20955e-32	0.219521	0.477	0.268	2.06664e-28
Atp2b1	1.35495e-32	0.332419	0.793	0.574	2.31507e-28
Washc1	1.5328e-32	0.326906	0.273	0.128	2.61894e-28
Isg15	6.17855e-32	0.463618	0.551	0.336	1.05567e-27
Sh3bgrl3	7.65476e-32	0.292001	0.964	0.825	1.30789e-27
Serf2	1.31914e-31	0.242685	0.964	0.822	2.25388e-27
Pkp3	1.74122e-31	0.214984	0.255	0.112	2.97504e-27
Cfdp1	2.29528e-31	0.226551	0.455	0.263	3.92172e-27
Nmt1	2.49302e-31	0.26638	0.303	0.15	4.25957e-27
Rab10	3.13951e-31	0.273353	0.555	0.354	5.36417e-27
Snrnp25	3.74242e-31	0.536094	0.289	0.147	6.39429e-27
Mob1a	4.30253e-31	0.259271	0.486	0.292	7.35131e-27
Tnfaip8	4.90574e-31	0.29755	0.519	0.323	8.38195e-27
Got2	5.04011e-31	0.312237	0.362	0.196	8.61153e-27
Sin3b	5.24484e-31	0.252971	0.606	0.389	8.96134e-27
3830406C13Rik	6.5551e-31	0.271018	0.285	0.138	1.12001e-26
Srebf2	8.7964e-31	0.216809	0.342	0.174	1.50295e-26
Dnajc15	1.48948e-30	0.426601	0.605	0.414	2.54493e-26
Ankrd12	2.21002e-30	0.224418	0.437	0.246	3.77604e-26
Tspo	2.57279e-30	0.507196	0.85	0.643	4.39587e-26
Gtpbp4	3.68538e-30	0.346499	0.405	0.235	6.29684e-26
Pafah1b3	4.50904e-30	0.228323	0.31	0.154	7.70414e-26
Sel1l	4.55531e-30	0.226535	0.288	0.14	7.78321e-26
Fbxo6	5.27373e-30	0.265718	0.277	0.134	9.01069e-26
Skap2	5.33266e-30	0.265965	0.606	0.382	9.11139e-26
Elk3	8.18974e-30	0.218313	0.248	0.112	1.3993e-25
Bex3	1.10287e-29	0.247067	0.357	0.188	1.88436e-25
Psmd8	1.92301e-29	0.25078	0.711	0.463	3.28566e-25
Kif2a	2.175e-29	0.236404	0.299	0.15	3.71621e-25
Arrdc4	2.99482e-29	0.245455	0.211	0.09	5.11695e-25
Tbrg1	3.06163e-29	0.221227	0.421	0.24	5.2311e-25
Ubxn4	3.39894e-29	0.290196	0.569	0.37	5.80743e-25
Eif4b	3.52768e-29	0.261106	0.453	0.268	6.02739e-25
Rad50	4.71268e-29	0.244841	0.273	0.132	8.05209e-25
Cdc37	7.05289e-29	0.244931	0.636	0.421	1.20506e-24
Sbds	9.26424e-29	0.245229	0.404	0.23	1.58289e-24
Lpp	1.10687e-28	0.228986	0.245	0.112	1.8912e-24
Osbpl8	1.14813e-28	0.285017	0.404	0.23	1.96169e-24
Ezh2	1.19077e-28	0.227597	0.253	0.117	2.03455e-24
St3gal4	1.19682e-28	0.312909	0.31	0.161	2.04489e-24
Scand1	1.35671e-28	0.359231	0.661	0.466	2.31808e-24
Dlgap4	1.61511e-28	0.236337	0.292	0.147	2.75957e-24
Uqcrfs1	2.62355e-28	0.224372	0.697	0.471	4.48259e-24
Psmc2	2.86387e-28	0.257107	0.47	0.283	4.8932e-24
Ppp1r12a	3.72779e-28	0.208796	0.547	0.343	6.3693e-24
Tbl1x	4.6072e-28	0.21563	0.263	0.126	7.87186e-24
Plekha1	5.20216e-28	0.208177	0.238	0.109	8.88842e-24
Slc25a11	5.29723e-28	0.245681	0.47	0.285	9.05084e-24
Arpc5	7.68159e-28	0.253417	0.895	0.657	1.31248e-23
Rab43	8.84354e-28	0.246544	0.212	0.093	1.51101e-23
Sdf2	9.30366e-28	0.244414	0.41	0.236	1.58962e-23
Slc25a4	9.65118e-28	0.27835	0.584	0.374	1.649e-23
Dnajb14	9.70831e-28	0.267441	0.36	0.2	1.65876e-23
Cfl1	1.00787e-27	0.294461	0.944	0.81	1.72204e-23
Rdx	1.36776e-27	0.224961	0.423	0.246	2.33695e-23
Sar1a	1.66981e-27	0.249601	0.467	0.283	2.85304e-23
Gsdmd	6.03065e-27	0.259145	0.35	0.195	1.0304e-22
Washc2	1.27071e-26	0.204781	0.322	0.17	2.17114e-22
Maff	2.63769e-26	0.243863	0.238	0.112	4.50676e-22
Atp6v0e	2.82462e-26	0.225691	0.894	0.634	4.82614e-22
Rufy3	3.55007e-26	0.245111	0.219	0.1	6.06565e-22
Nrbf2	8.44073e-26	0.232212	0.263	0.132	1.44218e-21
Map4	1.35801e-25	0.22131	0.251	0.123	2.3203e-21
Atp6v1f	1.43708e-25	0.264874	0.837	0.614	2.4554e-21
Gnas	2.82392e-25	0.235558	0.898	0.716	4.82495e-21
Psmb10	7.18475e-25	0.245534	0.632	0.434	1.22759e-20
Taf10	7.34284e-25	0.206972	0.556	0.354	1.2546e-20
Rsu1	1.72289e-24	0.251155	0.475	0.302	2.94373e-20
Arf5	1.78898e-24	0.237872	0.843	0.615	3.05664e-20
Arl3	2.0162e-24	0.247653	0.28	0.149	3.44488e-20
Cct4	2.52707e-24	0.200743	0.653	0.443	4.31774e-20
Ubc	3.00796e-24	0.270469	0.923	0.773	5.13941e-20
Hsp90ab1	3.2797e-24	0.263503	0.963	0.814	5.60369e-20
Hat1	3.45314e-24	0.2204	0.284	0.149	5.90004e-20
Samhd1	4.03131e-24	0.217902	0.704	0.489	6.8879e-20
Chchd2	4.41989e-24	0.237477	0.939	0.775	7.55182e-20
Psmc4	4.94472e-24	0.206286	0.46	0.289	8.44855e-20
Cox4i1	7.49461e-24	0.225236	0.967	0.812	1.28053e-19
Hspb11	8.04879e-24	0.228872	0.285	0.154	1.37522e-19
Rbbp7	8.28571e-24	0.20024	0.387	0.225	1.4157e-19
Irf1	1.36724e-23	0.247473	0.397	0.231	2.33607e-19
Ssu72	1.406e-23	0.20864	0.624	0.418	2.40229e-19
Sema4a	1.70495e-23	0.202497	0.307	0.166	2.91308e-19
Clip1	2.40109e-23	0.227917	0.293	0.159	4.1025e-19
Ccdc50	3.45936e-23	0.268394	0.364	0.215	5.91066e-19
Pdcl3	7.60033e-23	0.204855	0.387	0.235	1.29859e-18
Tmem173	1.1063e-22	0.210784	0.264	0.139	1.89022e-18
Dek	1.12607e-22	0.223764	0.66	0.446	1.924e-18
Fbxo4	1.23822e-22	0.205991	0.216	0.105	2.11562e-18
Os9	1.51755e-22	0.203374	0.382	0.23	2.59288e-18
Dennd5a	4.03721e-22	0.234801	0.266	0.14	6.89799e-18
Edem1	4.27345e-22	0.255052	0.368	0.222	7.30161e-18
Ilk	5.55421e-22	0.24112	0.394	0.24	9.48993e-18
Acadm	1.10645e-21	0.318548	0.291	0.166	1.89048e-17
Nans	1.25145e-21	0.322262	0.354	0.22	2.13823e-17
Gpr65	3.15631e-21	0.236837	0.26	0.139	5.39287e-17
Nap1l1	3.76279e-21	0.238306	0.702	0.489	6.4291e-17
Rnaseh2b	4.01822e-21	0.247749	0.219	0.111	6.86553e-17
Ubb	7.58545e-21	0.203597	0.972	0.884	1.29605e-16
Chp1	8.22892e-21	0.222881	0.28	0.156	1.40599e-16
Apip	8.47189e-21	0.217984	0.237	0.125	1.44751e-16
Kxd1	1.17111e-20	0.214435	0.394	0.244	2.00097e-16
Psmd10	1.59646e-20	0.216231	0.27	0.15	2.72771e-16
Ywhaq	2.12184e-20	0.208451	0.617	0.429	3.62537e-16
2310011J03Rik	3.23592e-20	0.210491	0.314	0.183	5.5289e-16
Hist1h2bc	3.89135e-20	0.27006	0.292	0.164	6.64877e-16
Fam96a	7.32951e-20	0.237013	0.57	0.387	1.25232e-15
Psmd11	8.44909e-20	0.210208	0.46	0.304	1.44361e-15
Dap	2.83095e-19	0.468694	0.395	0.262	4.83696e-15
Vdac1	8.8129e-19	0.200441	0.428	0.278	1.50577e-14
Glod4	1.13663e-18	0.203089	0.306	0.181	1.94204e-14
Napsa	1.66824e-18	0.246871	0.585	0.404	2.85035e-14
Irf5	2.32055e-18	0.207456	0.547	0.377	3.9649e-14
Polr2g	3.58242e-18	0.240589	0.449	0.303	6.12093e-14
Psmd1	4.02168e-18	0.200609	0.315	0.191	6.87144e-14
Naxe	2.22556e-17	0.22957	0.336	0.214	3.80259e-13
Psmd14	2.97399e-16	0.212829	0.402	0.268	5.08136e-12
Ssr2	2.12838e-15	0.232422	0.474	0.334	3.63654e-11
Slc25a20	3.30564e-15	0.210653	0.225	0.127	5.64802e-11
Atp6v0b	5.86637e-14	0.221122	0.767	0.571	1.00233e-09
Bmyc	1.22765e-12	0.264352	0.304	0.206	2.09757e-08
Hfe	3.69514e-12	0.326557	0.296	0.2	6.31352e-08
Vwa5a	1.12334e-11	0.230076	0.237	0.151	1.91934e-07
Ccnd1	8.16579e-09	0.282531	0.315	0.228	0.000139521
Irf7	1.44974e-07	0.344269	0.452	0.354	0.00247703
Lgals3bp	0.00416047	0.220397	0.357	0.309	1

## Sheet: DEND2
	p_val	avg_logFC	pct.1	pct.2	p_val_adj
Cd209a	0	1.99676	0.498	0.03	0
H2-Ab1	0	1.24507	0.946	0.481	0
Clec4b1	0	1.20577	0.661	0.151	0
H2-Aa	0	1.1829	0.943	0.478	0
H2-DMb1	0	1.18113	0.926	0.349	0
H2-Eb1	0	1.16871	0.935	0.473	0
Tnfsf9	0	1.14373	0.485	0.086	0
Ccnd1	0	1.063	0.656	0.171	0
Tnip3	0	1.00919	0.543	0.119	0
Cd74	0	0.977886	0.963	0.501	0
H2afz	0	0.968712	0.96	0.644	0
Klrd1	0	0.968704	0.483	0.117	0
Napsa	0	0.944158	0.797	0.355	0
Slamf9	0	0.934677	0.631	0.137	0
Ms4a4c	0	0.93122	0.741	0.302	0
Clec10a	0	0.926936	0.483	0.113	0
Lsp1	0	0.92221	0.953	0.578	0
H2-DMa	0	0.884207	0.938	0.476	0
Ms4a6c	0	0.866765	0.887	0.394	0
S100a4	0	0.834098	0.911	0.373	0
Cd72	0	0.827022	0.516	0.17	0
Syngr2	0	0.815222	0.837	0.355	0
Gm2a	0	0.813975	0.882	0.402	0
Ifitm3	0	0.809672	0.963	0.517	0
Avpi1	0	0.807127	0.542	0.13	0
Cfp	0	0.793544	0.759	0.297	0
Crip1	0	0.78653	0.924	0.68	0
Ccr2	0	0.780254	0.77	0.3	0
Fxyd5	0	0.776766	0.943	0.624	0
H2afy	0	0.75878	0.855	0.421	0
Pclaf	0	0.752451	0.252	0.053	0
Ifitm2	0	0.696153	0.926	0.499	0
Ckb	0	0.679169	0.765	0.302	0
Ccdc88a	0	0.678005	0.644	0.217	0
Tmem176b	0	0.661946	0.683	0.223	0
Ctsh	0	0.658833	0.936	0.523	0
Phf11b	0	0.646971	0.615	0.265	0
Cd300a	0	0.642306	0.748	0.311	0
Pmaip1	0	0.625585	0.578	0.223	0
Gpx1	0	0.623875	0.97	0.64	0
Rassf4	0	0.621997	0.699	0.272	0
Vim	0	0.621682	0.914	0.598	0
S100a6	0	0.615576	0.955	0.539	0
Traf1	0	0.601133	0.641	0.23	0
Tagln2	0	0.600506	0.895	0.564	0
Tmem176a	0	0.597814	0.591	0.181	0
Olfm1	0	0.584031	0.473	0.114	0
Cbfa2t3	0	0.581737	0.536	0.165	0
Mcub	0	0.581595	0.587	0.247	0
Clec4a3	0	0.565147	0.641	0.264	0
Ly86	0	0.5642	0.859	0.45	0
Wfdc17	0	0.560839	0.859	0.409	0
Tep1	0	0.55235	0.557	0.2	0
Pitpna	0	0.552312	0.826	0.427	0
Ccl9	0	0.5394	0.805	0.357	0
Atox1	0	0.536185	0.948	0.606	0
Bex6	0	0.535821	0.287	0.019	0
Bhlhe40	0	0.53086	0.519	0.184	0
Plbd1	0	0.526432	0.799	0.297	0
Pid1	0	0.519692	0.692	0.309	0
Spi1	0	0.518283	0.898	0.485	0
Pld4	0	0.517608	0.786	0.4	0
Ciita	0	0.516028	0.51	0.148	0
Ccnd2	0	0.513521	0.538	0.2	0
Alox5ap	0	0.507649	0.929	0.497	0
Ass1	0	0.505773	0.491	0.185	0
Ramp1	0	0.487506	0.484	0.164	0
Cdkn1a	0	0.485423	0.818	0.405	0
Sh3bgrl3	0	0.477898	0.982	0.808	0
Actg1	0	0.476087	0.981	0.788	0
Erp29	0	0.472397	0.867	0.491	0
Mcemp1	0	0.466516	0.33	0.083	0
Fam96a	0	0.464044	0.707	0.349	0
Rnase6	0	0.460096	0.598	0.217	0
Evi2a	0	0.4589	0.763	0.378	0
Hexb	0	0.455857	0.713	0.342	0
Stx7	0	0.449982	0.7	0.326	0
Prcp	0	0.44887	0.694	0.303	0
Eps8	0	0.447217	0.468	0.162	0
Cybb	0	0.438405	0.823	0.387	0
Alcam	0	0.431421	0.482	0.177	0
Tctex1d2	0	0.426655	0.477	0.171	0
Acer3	0	0.420875	0.485	0.178	0
1700025G04Rik	0	0.408359	0.367	0.098	0
Fh1	0	0.405283	0.429	0.142	0
Trappc5	0	0.405049	0.449	0.15	0
Ifitm6	0	0.403546	0.543	0.168	0
Map4k1	0	0.382061	0.403	0.126	0
Itgax	0	0.361281	0.315	0.076	0
Ltb4r1	0	0.357483	0.253	0.054	0
Ank	0	0.316114	0.267	0.046	0
Sh2d1b1	0	0.306533	0.263	0.049	0
Cd300lg	0	0.214471	0.24	0.046	0
Tspo	1.44436e-306	0.591371	0.917	0.612	2.46784e-302
Birc5	2.84779e-306	0.730483	0.237	0.051	4.86574e-302
Pip4k2a	2.88948e-306	0.353605	0.526	0.205	4.93697e-302
Mki67	1.49505e-304	0.517052	0.232	0.049	2.55444e-300
Mpp6	2.55597e-304	0.392462	0.426	0.15	4.36713e-300
Axl	4.08931e-301	0.499941	0.412	0.143	6.987e-297
Fam105a	1.15754e-300	0.454784	0.682	0.327	1.97777e-296
Nfkbia	6.22141e-299	0.672074	0.898	0.631	1.06299e-294
Ywhah	9.23979e-299	0.502031	0.787	0.427	1.57871e-294
Pycard	1.71419e-298	0.503651	0.796	0.435	2.92886e-294
Nrros	2.21837e-291	0.423367	0.691	0.332	3.79031e-287
Laptm5	7.3761e-288	0.444768	0.962	0.664	1.26028e-283
Tmsb4x	1.69111e-287	0.384012	0.993	0.886	2.88942e-283
Ptpn6	6.20227e-286	0.445907	0.764	0.409	1.05972e-281
Mgl2	5.61991e-285	0.51222	0.333	0.096	9.60218e-281
Arl6ip5	3.05628e-284	0.40126	0.755	0.395	5.22196e-280
Nfam1	3.68923e-284	0.334433	0.455	0.168	6.30342e-280
Fgr	1.14958e-283	0.3073	0.37	0.116	1.96417e-279
Lactb	2.93344e-278	0.321454	0.467	0.18	5.01208e-274
Cks1b	1.08734e-276	0.523917	0.332	0.103	1.85783e-272
Taok3	4.4157e-276	0.389409	0.626	0.293	7.54466e-272
Nfkb1	3.34222e-275	0.449272	0.604	0.277	5.71051e-271
Gnai2	8.60938e-275	0.428164	0.945	0.643	1.471e-270
Csrnp1	2.62417e-273	0.450926	0.609	0.284	4.48366e-269
Stmn1	1.04834e-272	1.01423	0.437	0.179	1.79119e-268
Kmo	1.46166e-271	0.346733	0.232	0.054	2.4974e-267
Ybx3	1.60655e-269	0.379137	0.451	0.175	2.74496e-265
Cysltr1	2.82958e-269	0.344474	0.311	0.094	4.83462e-265
Sdf2l1	3.03104e-269	0.47436	0.663	0.324	5.17884e-265
St3gal4	5.88289e-269	0.359731	0.386	0.135	1.00515e-264
Nfkbiz	1.32982e-268	0.430639	0.596	0.272	2.27214e-264
Itgb7	1.03956e-265	0.422987	0.579	0.257	1.77619e-261
Tuba1b	1.83649e-264	0.703405	0.803	0.484	3.13782e-260
Top2a	1.91769e-264	0.629632	0.246	0.061	3.27656e-260
Arpc1b	2.90654e-264	0.423236	0.967	0.716	4.96612e-260
Ptma	1.12876e-261	0.437242	0.987	0.845	1.92859e-257
Elmo2	3.23061e-261	0.298503	0.342	0.11	5.51981e-257
Atf3	6.45641e-260	0.471751	0.81	0.451	1.10314e-255
Tubb5	1.9033e-258	0.745102	0.769	0.444	3.25197e-254
Cx3cr1	1.162e-257	0.315496	0.334	0.101	1.9854e-253
Psmd8	1.17462e-256	0.404676	0.78	0.427	2.00695e-252
Ctsz	1.45326e-256	0.400298	0.902	0.538	2.48304e-252
Srsf9	3.99583e-256	0.323593	0.576	0.259	6.82727e-252
Etv3	1.31948e-255	0.445924	0.444	0.175	2.25447e-251
Cdkn2d	5.40865e-255	0.355519	0.432	0.162	9.24121e-251
Glud1	2.49624e-254	0.369985	0.717	0.377	4.26508e-250
Vrk1	5.59555e-254	0.341727	0.403	0.146	9.56055e-250
Cd300c2	1.65526e-253	0.340154	0.703	0.339	2.82817e-249
Socs3	2.65701e-253	0.473532	0.467	0.189	4.53977e-249
Neat1	9.72029e-253	0.451939	0.849	0.516	1.66081e-248
Ptpro	1.44694e-252	0.302612	0.353	0.117	2.47224e-248
Fam49b	1.69272e-251	0.409588	0.862	0.518	2.89218e-247
Mthfd2	5.15362e-251	0.333069	0.386	0.137	8.80548e-247
Clic1	5.77935e-251	0.434211	0.945	0.67	9.87459e-247
Cd7	8.17666e-251	0.676403	0.23	0.056	1.39706e-246
Twf2	1.20331e-250	0.344077	0.577	0.262	2.05597e-246
Icam1	5.35806e-250	0.476301	0.566	0.265	9.15479e-246
Csf2ra	9.91052e-250	0.352597	0.543	0.243	1.69331e-245
Zyx	1.57543e-249	0.378835	0.627	0.302	2.69178e-245
Ptms	9.28702e-249	0.398484	0.708	0.351	1.58678e-244
Fcer1g	2.78671e-247	0.410541	0.98	0.582	4.76137e-243
Lmo1	1.23554e-244	0.273661	0.21	0.049	2.11104e-240
Smdt1	1.30781e-239	0.395975	0.887	0.532	2.23452e-235
Hfe	4.47873e-239	0.427964	0.431	0.171	7.65235e-235
Anp32e	6.69381e-236	0.330116	0.569	0.263	1.1437e-231
Dnajb14	1.01015e-235	0.374436	0.429	0.173	1.72594e-231
Psma4	1.23781e-234	0.373424	0.791	0.438	2.11492e-230
Ccnd3	1.24709e-234	0.327959	0.528	0.23	2.13077e-230
Zmiz2	2.3686e-233	0.27965	0.334	0.113	4.047e-229
Hspa8	3.07245e-232	0.454141	0.968	0.784	5.24958e-228
Sh3bgrl	3.24464e-232	0.342348	0.689	0.356	5.54379e-228
Tkt	4.53877e-231	0.357456	0.73	0.394	7.75495e-227
Card11	5.94978e-231	0.264091	0.261	0.075	1.01658e-226
Snx20	7.82066e-231	0.335246	0.631	0.311	1.33624e-226
Anp32b	2.08504e-227	0.44516	0.812	0.497	3.56249e-223
Cdca8	6.22463e-227	0.38061	0.201	0.048	1.06354e-222
Bst2	2.47448e-226	0.472888	0.83	0.494	4.2279e-222
Etfb	3.36515e-226	0.315614	0.66	0.338	5.74969e-222
Ifi27l2a	5.25041e-226	0.605792	0.804	0.538	8.97085e-222
Psma7	2.67147e-225	0.378313	0.895	0.56	4.56448e-221
Klf4	2.07761e-224	0.409085	0.771	0.439	3.5498e-220
Oasl2	5.27072e-224	0.391204	0.419	0.17	9.00555e-220
Tuba1a	5.65241e-224	0.240164	0.64	0.316	9.65771e-220
Phf11d	1.01197e-222	0.451605	0.339	0.123	1.72905e-218
Ubl3	2.98994e-222	0.301921	0.727	0.387	5.10861e-218
Selplg	1.01724e-221	0.322068	0.816	0.468	1.73805e-217
Cks2	2.44672e-220	0.39231	0.445	0.187	4.18046e-216
Osgep	3.51748e-220	0.277056	0.453	0.19	6.00997e-216
Pirb	5.86595e-220	0.306302	0.581	0.275	1.00226e-215
Slk	2.21502e-219	0.305962	0.437	0.179	3.78459e-215
Ranbp1	1.7675e-217	0.42231	0.736	0.418	3.01995e-213
Capza2	5.14403e-217	0.346678	0.89	0.541	8.78909e-213
Chmp4b	6.15193e-217	0.347889	0.816	0.466	1.05112e-212
Cyth4	7.74657e-217	0.349652	0.653	0.336	1.32358e-212
Racgap1	9.48033e-217	0.271298	0.204	0.05	1.61981e-212
Slamf7	1.52054e-216	0.40463	0.559	0.272	2.59799e-212
Grk3	1.91425e-216	0.28385	0.299	0.098	3.27069e-212
Agpat4	2.15478e-216	0.329215	0.446	0.189	3.68165e-212
Smc2	4.27764e-216	0.433327	0.289	0.095	7.30877e-212
Necap2	5.36795e-215	0.305863	0.59	0.29	9.17167e-211
Sptssa	1.87867e-214	0.349929	0.635	0.329	3.2099e-210
Emp3	4.49387e-214	0.369873	0.909	0.586	7.67823e-210
Ppfia4	1.36713e-212	0.341319	0.336	0.124	2.33588e-208
Fgfr1	1.67061e-212	0.310147	0.21	0.055	2.8544e-208
Eif5a	2.5263e-211	0.392765	0.91	0.611	4.31644e-207
Il1b	3.48977e-210	0.424876	0.526	0.256	5.96262e-206
Anxa2	3.8637e-210	0.397319	0.858	0.513	6.60151e-206
Lmnb1	1.16513e-209	0.22297	0.408	0.163	1.99075e-205
Pltp	2.86319e-209	0.40515	0.489	0.22	4.89205e-205
Clec4a1	3.96931e-209	0.352963	0.532	0.241	6.78197e-205
Mgst3	6.91493e-208	0.291637	0.306	0.107	1.18149e-203
Nap1l1	2.16322e-207	0.34707	0.776	0.456	3.69607e-203
Sgk3	5.03694e-207	0.278024	0.392	0.157	8.60612e-203
Hat1	1.02299e-206	0.30069	0.341	0.127	1.74789e-202
Tmed3	5.25893e-206	0.31615	0.549	0.266	8.9854e-202
Tmem219	1.35517e-205	0.303812	0.54	0.258	2.31544e-201
Pim1	2.84311e-205	0.4063	0.822	0.519	4.85773e-201
Tnni2	4.14511e-205	0.372078	0.355	0.134	7.08233e-201
Grb2	9.09326e-205	0.387948	0.712	0.393	1.55367e-200
Psmb8	1.52984e-203	0.315014	0.932	0.621	2.61389e-199
Cct5	2.9477e-203	0.302498	0.737	0.405	5.03645e-199
Marcksl1	2.84311e-202	0.297807	0.648	0.327	4.85774e-198
Tyrobp	7.25989e-202	0.30216	0.974	0.623	1.24042e-197
U2af1	1.32832e-201	0.287733	0.684	0.363	2.26957e-197
Skap2	2.06979e-201	0.281234	0.676	0.349	3.53645e-197
Lamtor1	2.14849e-201	0.327698	0.678	0.364	3.67091e-197
Rnh1	2.94538e-201	0.316244	0.773	0.426	5.03247e-197
Colgalt1	3.02158e-201	0.316036	0.47	0.215	5.16267e-197
Cd52	5.12717e-201	0.395777	0.966	0.785	8.76028e-197
Dpp4	1.05506e-200	0.269046	0.278	0.091	1.80267e-196
Tlr2	3.02317e-200	0.26308	0.387	0.153	5.1654e-196
Myo1g	6.74427e-199	0.205467	0.521	0.238	1.15233e-194
Ddost	1.66212e-198	0.294882	0.604	0.307	2.83991e-194
Hspa1a	2.25961e-197	0.462986	0.633	0.337	3.86077e-193
Crlf2	2.58478e-197	0.285043	0.628	0.323	4.41636e-193
Klrk1	3.13029e-197	0.216516	0.363	0.139	5.34842e-193
Ezh2	3.84845e-197	0.308659	0.288	0.098	6.57546e-193
Baz1a	1.49328e-196	0.26316	0.579	0.28	2.55141e-192
Plp2	4.1046e-196	0.274535	0.406	0.17	7.01311e-192
Dek	1.3435e-195	0.38484	0.718	0.415	2.2955e-191
Tmem59	5.56841e-195	0.293424	0.754	0.427	9.51418e-191
Pdia6	2.38849e-194	0.350274	0.718	0.397	4.08098e-190
Anxa5	4.19161e-194	0.26971	0.884	0.516	7.16179e-190
Rin3	2.18297e-192	0.208178	0.271	0.089	3.72983e-188
Zeb2	6.90765e-192	0.243108	0.724	0.371	1.18024e-187
Syce2	7.86977e-192	0.2559	0.226	0.066	1.34463e-187
Milr1	2.74351e-191	0.293857	0.381	0.157	4.68756e-187
Phf11a	1.85359e-190	0.338915	0.29	0.102	3.16705e-186
Mcm5	8.38531e-189	0.241269	0.211	0.059	1.43271e-184
Psmb2	1.11978e-188	0.299266	0.815	0.474	1.91325e-184
Fam69a	1.39898e-188	0.22632	0.371	0.149	2.39029e-184
Rgs18	4.53492e-188	0.270958	0.298	0.108	7.74837e-184
Batf	6.11972e-187	0.301967	0.345	0.136	1.04562e-182
Hcls1	3.08213e-186	0.264435	0.745	0.408	5.26612e-182
Mcm3	4.6612e-186	0.27869	0.267	0.089	7.96412e-182
Ifit3	9.36548e-186	0.548474	0.337	0.132	1.60019e-181
Tmpo	3.05989e-185	0.345472	0.492	0.234	5.22812e-181
Atp6ap2	3.08115e-185	0.297605	0.596	0.309	5.26445e-181
Cd47	4.28243e-185	0.339659	0.915	0.606	7.31697e-181
Isg15	4.64559e-185	0.55005	0.583	0.309	7.93745e-181
Nfkbid	1.91253e-184	0.224176	0.487	0.223	3.26775e-180
Aldh9a1	7.64699e-184	0.267656	0.355	0.144	1.30656e-179
Sbno2	6.336e-183	0.275031	0.427	0.188	1.08257e-178
Lyn	9.61872e-183	0.223499	0.633	0.326	1.64345e-178
Gpr132	1.74882e-182	0.213129	0.449	0.194	2.98804e-178
5031439G07Rik	4.7074e-182	0.267091	0.443	0.2	8.04306e-178
H13	6.46999e-182	0.281311	0.618	0.321	1.10546e-177
Ywhae	1.06671e-181	0.308327	0.833	0.491	1.82258e-177
Anxa1	1.19752e-181	0.285618	0.704	0.385	2.04608e-177
Kcnn4	1.50617e-181	0.324164	0.336	0.134	2.57344e-177
Prkcd	5.32046e-181	0.244828	0.663	0.356	9.09055e-177
Maff	1.2995e-180	0.261256	0.273	0.094	2.22033e-176
Ndufs8	1.6333e-180	0.242051	0.626	0.327	2.79066e-176
Efhd2	1.99721e-180	0.312127	0.821	0.486	3.41243e-176
Arhgap9	8.85533e-180	0.25381	0.486	0.229	1.51302e-175
Gltp	3.10658e-179	0.302699	0.755	0.42	5.3079e-175
Cotl1	7.13899e-179	0.3542	0.884	0.585	1.21977e-174
Ctnna1	1.41691e-178	0.299626	0.409	0.182	2.42093e-174
Cnih4	4.307e-178	0.271222	0.605	0.317	7.35894e-174
Calm3	4.84635e-178	0.291693	0.766	0.444	8.28047e-174
Rtp4	6.94254e-178	0.318749	0.534	0.263	1.1862e-173
Gmnn	1.38395e-177	0.345832	0.295	0.112	2.36461e-173
Ndufc2	1.80603e-177	0.283844	0.788	0.466	3.08578e-173
Haus8	2.01018e-177	0.351182	0.347	0.143	3.43459e-173
Ube2f	3.69971e-177	0.261686	0.495	0.24	6.32133e-173
Bmyc	4.00416e-177	0.231837	0.414	0.18	6.84151e-173
Tifab	9.37822e-177	0.277928	0.298	0.112	1.60236e-172
Slfn2	3.94175e-176	0.32381	0.815	0.492	6.73487e-172
Lat2	2.71582e-175	0.21625	0.647	0.336	4.64024e-171
Myd88	2.6851e-174	0.265627	0.396	0.173	4.58776e-170
Dbi	5.86494e-174	0.295544	0.828	0.509	1.00208e-169
Cd83	6.79205e-174	0.333778	0.723	0.415	1.16049e-169
Usp18	1.13768e-173	0.467724	0.363	0.156	1.94384e-169
Csrp1	1.27062e-173	0.200919	0.394	0.169	2.17099e-169
Fam111a	1.31982e-173	0.24706	0.517	0.252	2.25504e-169
Cd48	3.14564e-173	0.296841	0.769	0.447	5.37463e-169
Ryr1	9.83695e-173	0.239165	0.243	0.08	1.68074e-168
Spag9	2.04873e-171	0.269614	0.584	0.305	3.50046e-167
Lsm2	5.76283e-171	0.257866	0.385	0.168	9.84637e-167
Sec61b	8.02445e-171	0.342905	0.919	0.629	1.37106e-166
Hnrnpa3	1.04727e-170	0.294131	0.853	0.537	1.78936e-166
Dck	1.65326e-170	0.247592	0.374	0.16	2.82476e-166
Gpr141	1.76651e-170	0.217218	0.248	0.083	3.01826e-166
Irf5	2.43739e-170	0.268109	0.647	0.345	4.16452e-166
Selenoh	6.70653e-170	0.321781	0.506	0.254	1.14588e-165
Bri3bp	4.55871e-169	0.252903	0.329	0.131	7.78901e-165
Map3k8	4.74799e-169	0.259377	0.428	0.194	8.11241e-165
Irf7	1.12116e-168	0.53178	0.588	0.324	1.91561e-164
Ifi35	1.21593e-168	0.308036	0.563	0.295	2.07753e-164
Nhp2	3.8796e-168	0.243208	0.554	0.283	6.62868e-164
Atp5f1	6.57412e-168	0.30929	0.89	0.575	1.12325e-163
Uvrag	8.12013e-168	0.238954	0.434	0.199	1.3874e-163
Pnp	5.93468e-167	0.283327	0.615	0.333	1.014e-162
Coro1b	8.79103e-167	0.279996	0.642	0.349	1.50204e-162
Dpysl2	2.28335e-166	0.225144	0.329	0.131	3.90133e-162
Prelid1	3.63787e-166	0.304799	0.732	0.435	6.21567e-162
Bcl3	4.44113e-166	0.227311	0.227	0.073	7.58812e-162
Ly6a	5.23428e-166	0.700307	0.467	0.237	8.94329e-162
Siva1	8.16587e-166	0.306805	0.431	0.203	1.39522e-161
Lgals3bp	1.60469e-165	0.357695	0.54	0.278	2.74177e-161
Kdm6b	1.15636e-164	0.257049	0.548	0.28	1.97576e-160
Tmco1	2.11253e-164	0.236882	0.496	0.247	3.60946e-160
Ube2e3	2.99331e-164	0.247343	0.438	0.208	5.11437e-160
Nfkbie	4.47861e-164	0.266371	0.278	0.102	7.65216e-160
Tap1	4.59529e-164	0.236743	0.588	0.3	7.85151e-160
Clec4a2	5.04409e-164	0.27453	0.517	0.256	8.61834e-160
Slc15a4	5.76898e-164	0.230874	0.312	0.123	9.85688e-160
Zfp36	2.58264e-163	0.285827	0.817	0.512	4.41271e-159
Ms4a6b	5.68785e-163	0.301323	0.652	0.355	9.71827e-159
Apex1	1.22216e-162	0.23974	0.299	0.117	2.08819e-158
Lman2	1.89011e-162	0.258504	0.642	0.354	3.22943e-158
Impdh2	1.55864e-161	0.201631	0.504	0.245	2.6631e-157
Snrpd1	1.68558e-161	0.24765	0.61	0.331	2.87998e-157
Eno1	2.57808e-161	0.237314	0.593	0.317	4.4049e-157
Sap30	2.65582e-161	0.304909	0.493	0.25	4.53774e-157
Tgfbi	8.01081e-161	0.402222	0.606	0.347	1.36873e-156
Fosb	5.96136e-160	0.29523	0.768	0.473	1.01856e-155
Atp5o.1	4.14285e-159	0.246752	0.755	0.447	7.07847e-155
Ldlr	4.59229e-159	0.297215	0.301	0.117	7.84638e-155
Rnf114	5.32068e-159	0.223539	0.434	0.204	9.09092e-155
Slc35c2	1.1565e-158	0.250511	0.352	0.151	1.97599e-154
Tmem51	5.14894e-158	0.290136	0.384	0.175	8.79747e-154
Rps27l	1.54962e-157	0.261686	0.88	0.551	2.64768e-153
Actb	3.45726e-157	0.396928	0.901	0.673	5.90707e-153
Hsp90ab1	2.38698e-156	0.336134	0.975	0.796	4.07839e-152
Fcgr2b	5.74511e-156	0.296427	0.551	0.291	9.81609e-152
Bcl11a	5.86825e-156	0.218254	0.239	0.08	1.00265e-151
Etfa	1.06768e-155	0.206479	0.485	0.242	1.82424e-151
Mrps15	2.34343e-155	0.213276	0.486	0.242	4.00399e-151
Gnb2	7.11886e-155	0.304369	0.892	0.588	1.21633e-150
Dapp1	9.2088e-155	0.220537	0.361	0.157	1.57342e-150
Irgm1	1.02989e-154	0.27121	0.366	0.163	1.75967e-150
Sowahc	1.55158e-154	0.237851	0.252	0.091	2.65103e-150
Arhgdia	1.68968e-154	0.277151	0.834	0.513	2.88698e-150
Xaf1	2.44053e-154	0.310215	0.419	0.201	4.16989e-150
Pepd	2.40157e-153	0.285852	0.436	0.213	4.10333e-149
Ccdc12	2.7281e-153	0.240503	0.807	0.491	4.66123e-149
Ifrd1	3.55985e-153	0.287493	0.673	0.389	6.08236e-149
Zbp1	7.66659e-153	0.341638	0.519	0.274	1.30991e-148
2022-09-07	1.18243e-152	0.235106	0.751	0.441	2.02029e-148
H2afv	1.55911e-152	0.401861	0.574	0.315	2.6639e-148
Unc93b1	1.84002e-152	0.216085	0.805	0.47	3.14386e-148
Synj1	4.0346e-152	0.24332	0.41	0.191	6.89352e-148
Mndal	4.68941e-152	0.296753	0.717	0.421	8.01233e-148
Samd9l	8.20168e-152	0.233863	0.441	0.209	1.40134e-147
Tpm4	8.40874e-152	0.249308	0.732	0.436	1.43672e-147
Cox5a	8.56566e-152	0.279113	0.893	0.586	1.46353e-147
Rnf166	3.07934e-151	0.200132	0.338	0.143	5.26136e-147
Nucks1	4.09179e-151	0.306888	0.482	0.249	6.99124e-147
Bach1	1.40038e-150	0.235554	0.351	0.152	2.39268e-146
Nmral1	3.22284e-150	0.223084	0.215	0.072	5.50654e-146
Ccrl2	9.20443e-150	0.27296	0.371	0.167	1.57267e-145
Rab24	9.2133e-150	0.217486	0.405	0.19	1.57418e-145
Dpy19l1	1.08844e-149	0.205006	0.214	0.071	1.85971e-145
Hdgf	1.23377e-149	0.257977	0.556	0.3	2.10802e-145
Itpr1	1.54944e-149	0.20199	0.279	0.107	2.64737e-145
Set	2.01779e-149	0.252955	0.749	0.445	3.44759e-145
Rbpj	3.04167e-149	0.260782	0.488	0.248	5.197e-145
Fbl	3.44721e-149	0.227964	0.594	0.32	5.88991e-145
Tmem109	7.77505e-149	0.220123	0.334	0.144	1.32845e-144
Snx10	8.71284e-149	0.242835	0.424	0.205	1.48868e-144
Mapk14	6.77464e-148	0.202219	0.386	0.177	1.15751e-143
Bak1	9.00424e-148	0.239212	0.382	0.177	1.53846e-143
Fam129a	1.29862e-147	0.22671	0.355	0.156	2.21882e-143
Stat3	5.15224e-147	0.211206	0.552	0.291	8.80312e-143
Nadk	5.47725e-147	0.205141	0.495	0.252	9.35844e-143
Pigx	6.27611e-147	0.20527	0.35	0.154	1.07234e-142
Arpc2	9.74374e-147	0.281709	0.967	0.736	1.66482e-142
Flt3	9.93955e-147	0.350324	0.246	0.093	1.69827e-142
Mrps6	1.38225e-146	0.210228	0.26	0.098	2.36171e-142
Rnd3	1.85952e-146	0.263884	0.213	0.072	3.17718e-142
Arl4c	3.98408e-146	0.222497	0.458	0.223	6.8072e-142
Ppia	8.09604e-146	0.317727	0.981	0.858	1.38329e-141
Rpn2	2.33455e-145	0.223929	0.607	0.336	3.98881e-141
Cfl1	2.35457e-144	0.293673	0.971	0.792	4.02303e-140
Ifih1	4.6758e-144	0.278266	0.282	0.114	7.98906e-140
Fkbp2	5.78833e-144	0.254956	0.615	0.344	9.88994e-140
Med30	6.887e-144	0.236357	0.402	0.192	1.17671e-139
Uqcc2	8.45362e-144	0.200315	0.573	0.311	1.44439e-139
Cox7b	1.22589e-143	0.251293	0.827	0.515	2.09455e-139
Nav1	1.97056e-143	0.230378	0.295	0.121	3.3669e-139
Eif4h	2.43087e-143	0.208181	0.621	0.345	4.15339e-139
Ssr4	3.77938e-143	0.24415	0.816	0.497	6.45744e-139
Mdh2	4.08612e-143	0.215465	0.701	0.407	6.98154e-139
Myadm	4.40011e-143	0.204712	0.479	0.242	7.51803e-139
H3f3a	5.45233e-143	0.233021	0.977	0.838	9.31585e-139
Ran	5.64252e-143	0.315274	0.81	0.529	9.6408e-139
Cyp4f16	9.23608e-143	0.229782	0.202	0.066	1.57808e-138
Pdia3	9.52623e-143	0.288563	0.81	0.499	1.62765e-138
Tppp3	9.84086e-143	0.284924	0.27	0.104	1.68141e-138
Ndufs2	3.04728e-142	0.200736	0.573	0.31	5.20659e-138
Cyba	5.83862e-142	0.28735	0.958	0.742	9.97587e-138
Srsf3	2.04929e-141	0.236047	0.798	0.494	3.50142e-137
Gsto1	2.72836e-141	0.246182	0.429	0.212	4.66168e-137
Vdac3	4.45406e-140	0.21667	0.592	0.33	7.6102e-136
Edem1	5.55847e-140	0.222784	0.412	0.2	9.4972e-136
Tipin	2.15571e-139	0.221482	0.255	0.097	3.68324e-135
Eef1akmt1	2.50632e-139	0.203718	0.307	0.13	4.28229e-135
H2-D1	2.74977e-139	0.261028	0.988	0.869	4.69826e-135
Actr3	3.09923e-139	0.282782	0.942	0.667	5.29534e-135
Calm1	3.21416e-139	0.259704	0.984	0.81	5.49171e-135
Pfkp	4.5896e-139	0.225739	0.415	0.199	7.84179e-135
Capzb	4.96425e-139	0.25744	0.922	0.617	8.48191e-135
Herpud1	8.94717e-139	0.227002	0.501	0.255	1.52871e-134
Slfn5	1.86786e-138	0.317575	0.549	0.306	3.19142e-134
Atpif1	2.26317e-138	0.245663	0.827	0.509	3.86685e-134
Taf10	8.84742e-138	0.202386	0.594	0.327	1.51167e-133
Usp1	1.87248e-137	0.202824	0.314	0.134	3.19933e-133
Cenpa	1.94552e-137	0.333007	0.329	0.146	3.32411e-133
Clic4	4.42619e-137	0.202854	0.496	0.257	7.56259e-133
Bcl2a1d	5.49638e-137	0.267482	0.341	0.152	9.39112e-133
Ssr2	6.25249e-137	0.21425	0.563	0.307	1.0683e-132
Unc119	9.26453e-137	0.251967	0.409	0.197	1.58294e-132
Hpcal1	1.84576e-136	0.221514	0.569	0.313	3.15366e-132
Rogdi	1.97346e-136	0.213887	0.26	0.101	3.37186e-132
Hnrnpab	7.27169e-136	0.237639	0.678	0.403	1.24244e-131
Calr	1.30749e-135	0.32258	0.838	0.556	2.23397e-131
Hpf1	1.1662e-134	0.219599	0.413	0.205	1.99256e-130
Swi5	1.43347e-134	0.204562	0.736	0.433	2.44923e-130
Mcm6	3.0063e-134	0.213801	0.234	0.086	5.13657e-130
Pa2g4	4.14735e-134	0.221371	0.463	0.239	7.08616e-130
Sdc3	1.74443e-133	0.240181	0.458	0.238	2.98053e-129
Tmed10	3.55525e-133	0.226523	0.799	0.484	6.0745e-129
Cdk4	9.72954e-133	0.219971	0.484	0.254	1.66239e-128
Bloc1s2	1.14125e-132	0.201109	0.469	0.239	1.94993e-128
H2-T23	7.0337e-132	0.288506	0.826	0.551	1.20178e-127
Pcbp1	8.23058e-132	0.213119	0.763	0.462	1.40628e-127
Sp140	2.04995e-131	0.22236	0.425	0.212	3.50254e-127
Msn	4.31057e-131	0.212659	0.835	0.549	7.36504e-127
Mrpl28	7.18996e-131	0.201165	0.452	0.234	1.22848e-126
Mrpl18	1.87262e-130	0.211523	0.581	0.327	3.19956e-126
Psma5	2.5191e-130	0.207778	0.681	0.396	4.30414e-126
Sp110	4.78848e-130	0.221897	0.416	0.206	8.1816e-126
Tm6sf1	1.39906e-129	0.228818	0.584	0.329	2.39044e-125
Txn2	1.47594e-129	0.208486	0.573	0.321	2.5218e-125
Arpc4	6.57398e-129	0.208688	0.672	0.398	1.12323e-124
Cdc42	1.52106e-128	0.261817	0.949	0.704	2.59888e-124
Arf2	1.6208e-128	0.210253	0.266	0.109	2.76929e-124
Rps6ka1	1.64944e-128	0.204912	0.302	0.13	2.81823e-124
Hint1	4.05102e-128	0.281974	0.916	0.642	6.92157e-124
Hmox2	5.67936e-128	0.201025	0.518	0.28	9.70376e-124
Manf	2.08124e-127	0.245823	0.656	0.382	3.556e-123
Atp5c1	2.32672e-127	0.214868	0.857	0.546	3.97543e-123
Reep5	9.95547e-127	0.240339	0.848	0.543	1.70099e-122
Csf2rb	1.82578e-126	0.214857	0.37	0.178	3.11952e-122
Hsp90aa1	2.72208e-126	0.300277	0.932	0.697	4.65095e-122
Ybx1	3.17273e-126	0.274219	0.941	0.678	5.42092e-122
Zfand5	3.7415e-126	0.275429	0.767	0.485	6.39272e-122
Ifi47	7.19048e-126	0.284246	0.327	0.147	1.22856e-121
Tmem14c	1.55305e-125	0.208598	0.703	0.418	2.65354e-121
Eif3k	5.79784e-125	0.233017	0.911	0.636	9.9062e-121
Ldha	2.17276e-124	0.21883	0.851	0.532	3.71237e-120
Ucp2	2.58071e-124	0.254124	0.856	0.542	4.40941e-120
Arl8b	9.12028e-124	0.203817	0.382	0.187	1.55829e-119
Tubb6	2.89889e-123	0.262005	0.461	0.247	4.95304e-119
Nfe2l2	2.34361e-122	0.20327	0.567	0.32	4.00429e-118
Gapdh	8.74128e-122	0.232101	0.762	0.486	1.49353e-117
Atp5g1	3.82679e-121	0.231087	0.831	0.525	6.53845e-117
Coro1a	1.4508e-120	0.252198	0.949	0.739	2.47884e-116
Hck	9.80474e-120	0.22532	0.469	0.255	1.67524e-115
H2-Oa	2.10631e-119	0.275716	0.323	0.148	3.59884e-115
Lsr	5.85682e-119	0.225331	0.214	0.081	1.0007e-114
Dnajc7	6.79972e-118	0.207879	0.503	0.275	1.1618e-113
Eif4a1	1.03304e-117	0.261242	0.916	0.659	1.76506e-113
Slc25a5	1.68905e-117	0.239138	0.915	0.656	2.8859e-113
Ppib	7.26259e-117	0.22066	0.874	0.563	1.24089e-112
Ccdc34	1.64632e-116	0.209421	0.213	0.082	2.81291e-112
Cd40	6.21476e-116	0.227713	0.26	0.108	1.06185e-111
Pak1	2.4415e-115	0.209313	0.293	0.13	4.17154e-111
Ifit1	7.16796e-114	0.392143	0.23	0.093	1.22472e-109
Slamf8	1.02197e-113	0.235077	0.372	0.186	1.74613e-109
S100a10	1.10832e-113	0.349986	0.811	0.608	1.89368e-109
Shtn1	1.56276e-113	0.20797	0.302	0.139	2.67014e-109
Hsp90b1	4.73579e-113	0.284235	0.827	0.547	8.09157e-109
Clec12a	9.69145e-112	0.212904	0.582	0.338	1.65588e-107
Trim30a	1.71282e-111	0.227469	0.524	0.301	2.92652e-107
Cox6b1	4.12455e-111	0.23264	0.923	0.656	7.04721e-107
Ifi203	7.46539e-111	0.209265	0.63	0.372	1.27554e-106
Arf5	1.92964e-110	0.209522	0.884	0.585	3.29699e-106
Sigmar1	2.54416e-110	0.201839	0.295	0.136	4.34695e-106
Fos	1.28771e-108	0.286087	0.872	0.657	2.20018e-104
Ube2s	2.64988e-108	0.278317	0.67	0.431	4.52759e-104
Ppp1ca	5.12557e-108	0.201239	0.878	0.586	8.75756e-104
Grasp	5.83764e-108	0.297829	0.213	0.085	9.9742e-104
Dhx58	5.94214e-108	0.21273	0.261	0.116	1.01527e-103
Atp5g2	3.2486e-106	0.211657	0.874	0.609	5.55056e-102
Hmgb2	8.16867e-106	0.427786	0.661	0.432	1.3957e-101
Serf2	2.90126e-104	0.231135	0.973	0.806	4.95709e-100
H2afx	4.84683e-104	0.312716	0.298	0.142	8.28129e-100
Jun	3.19779e-103	0.241079	0.774	0.52	5.46375e-99
Jpt1	3.4989e-103	0.234381	0.841	0.575	5.97822e-99
Cd200r1	5.11344e-103	0.2095	0.223	0.093	8.73683e-99
Tor3a	2.75509e-102	0.232007	0.376	0.198	4.70735e-98
Glipr1	4.27764e-102	0.21351	0.554	0.327	7.30878e-98
Pfn1	8.72268e-100	0.211704	0.979	0.832	1.49036e-95
Hnrnpa2b1	1.3292e-99	0.202605	0.907	0.653	2.27107e-95
Ear2	2.62003e-98	0.425165	0.212	0.088	4.47659e-94
Isg20	6.58173e-98	0.334939	0.301	0.149	1.12455e-93
Hspa5	2.86964e-97	0.30156	0.867	0.629	4.90307e-93
Atp5h	1.12664e-95	0.204623	0.936	0.693	1.92497e-91
Atp5b	6.66483e-94	0.204998	0.897	0.624	1.13875e-89
Trafd1	7.62894e-93	0.200109	0.404	0.227	1.30348e-88
Fgl2	1.64906e-92	0.202527	0.391	0.209	2.81758e-88
Smc4	3.25831e-92	0.222233	0.425	0.239	5.56715e-88
Rac1	6.94537e-92	0.20182	0.873	0.592	1.18669e-87
Ahnak	1.6638e-89	0.214718	0.72	0.481	2.84277e-85
Furin	1.05171e-88	0.229461	0.315	0.165	1.79695e-84
Prdx4	5.35e-85	0.212952	0.373	0.21	9.14101e-81
Fam26f	2.10261e-82	0.215189	0.205	0.09	3.59252e-78
Mt1	1.30594e-78	0.299051	0.559	0.365	2.23133e-74
Arl6ip1	1.31974e-64	0.223992	0.764	0.527	2.25491e-60
Plac8	2.02556e-53	0.249857	0.535	0.38	3.46087e-49
Rsad2	8.03935e-52	0.221599	0.279	0.164	1.3736e-47

## Sheet: DEND1
	p_val	avg_logFC	pct.1	pct.2	p_val_adj
Cst3	0	2.5662	0.999	0.594	0
Naaa	0	2.3821	0.981	0.215	0
Irf8	0	2.00829	0.99	0.381	0
Plbd1	0	1.73226	0.983	0.304	0
Ppt1	0	1.71671	0.964	0.255	0
Ckb	0	1.48928	0.958	0.307	0
Psmb9	0	1.31108	0.972	0.401	0
H2-Ab1	0	1.24422	1	0.498	0
Ifi205	0	1.24171	0.785	0.073	0
H2-DMb1	0	1.23573	0.975	0.371	0
Jaml	0	1.22178	0.858	0.087	0
Naga	0	1.19965	0.845	0.122	0
Xcr1	0	1.18784	0.716	0.007	0
Gm2a	0	1.18768	0.971	0.416	0
H2afz	0	1.1766	0.987	0.656	0
Wdfy4	0	1.14365	0.865	0.107	0
Psmb8	0	1.13529	0.989	0.631	0
Tnni2	0	1.12749	0.803	0.105	0
Id2	0	1.11255	0.937	0.375	0
Cd24a	0	1.09122	0.942	0.232	0
Ppm1m	0	1.06263	0.859	0.148	0
Pkib	0	1.05715	0.839	0.163	0
Rnase6	0	1.05091	0.909	0.208	0
Trim35	0	1.02769	0.79	0.138	0
BC028528	0	1.02509	0.904	0.279	0
H2-Aa	0	1.02253	0.998	0.494	0
Sdf2l1	0	1.01864	0.835	0.325	0
H2-DMa	0	1.01816	0.986	0.493	0
H2afy	0	0.982122	0.964	0.431	0
Taldo1	0	0.980528	0.968	0.522	0
2022-09-03	0	0.968893	0.625	0.007	0
H2-Eb1	0	0.966135	0.998	0.489	0
Psme1	0	0.964402	0.978	0.532	0
Atpif1	0	0.960775	0.976	0.511	0
Rab7b	0	0.959915	0.915	0.271	0
Pak1	0	0.953709	0.74	0.099	0
Txndc15	0	0.939714	0.82	0.178	0
Ahr	0	0.925159	0.667	0.076	0
Batf3	0	0.922659	0.791	0.14	0
2022-09-06	0	0.910374	0.84	0.14	0
Actg1	0	0.903827	0.995	0.796	0
Pclaf	0	0.902014	0.325	0.056	0
Cks1b	0	0.892271	0.544	0.095	0
Hspa8	0	0.890715	0.985	0.791	0
Clec9a	0	0.890692	0.624	0.014	0
Cd74	0	0.883705	1	0.52	0
Acadl	0	0.871656	0.741	0.21	0
Pomp	0	0.871188	0.982	0.575	0
Tmsb4x	0	0.862083	0.992	0.891	0
Flt3	0	0.84853	0.704	0.06	0
Olfm1	0	0.833534	0.678	0.113	0
Unc119	0	0.831612	0.788	0.174	0
Ptms	0	0.820995	0.917	0.35	0
Sub1	0	0.816185	0.988	0.718	0
H2afx	0	0.815521	0.53	0.13	0
Dctpp1	0	0.803305	0.706	0.153	0
Pfkp	0	0.794828	0.748	0.18	0
Cadm1	0	0.793755	0.539	0.069	0
Fgd2	0	0.792203	0.764	0.134	0
Gdi2	0	0.791773	0.968	0.574	0
Slc25a20	0	0.788108	0.616	0.088	0
Pdia3	0	0.786402	0.939	0.502	0
Cldnd1	0	0.778678	0.684	0.167	0
Man2b1	0	0.778342	0.895	0.336	0
Gatm	0	0.776933	0.661	0.076	0
Cbfa2t3	0	0.769914	0.773	0.162	0
Rab32	0	0.757346	0.68	0.125	0
Atox1	0	0.756304	0.986	0.619	0
Gpr171	0	0.756115	0.605	0.1	0
Crip1	0	0.755336	0.992	0.686	0
Psap	0	0.754952	0.996	0.614	0
Tlr3	0	0.750908	0.493	0.018	0
Pmaip1	0	0.741432	0.772	0.223	0
Herpud1	0	0.737586	0.713	0.248	0
Commd8	0	0.73531	0.83	0.284	0
Ptma	0	0.733878	0.991	0.851	0
Fgl2	0	0.730392	0.762	0.185	0
Bloc1s2	0	0.71909	0.799	0.221	0
Napsa	0	0.714686	0.931	0.364	0
Lsp1	0	0.70314	0.987	0.592	0
Shtn1	0	0.699043	0.652	0.117	0
Ldha	0	0.69536	0.958	0.537	0
Dbnl	0	0.687974	0.845	0.305	0
Tap1	0	0.685627	0.844	0.292	0
Smdt1	0	0.685418	0.96	0.542	0
Txn1	0	0.680231	0.966	0.601	0
Pafah1b3	0	0.675063	0.681	0.113	0
Gcsam	0	0.670714	0.479	0.003	0
Mpeg1	0	0.666917	0.944	0.409	0
Cd52	0	0.661438	0.994	0.791	0
Ppp1r11	0	0.659988	0.829	0.292	0
Rtl8b	0	0.657769	0.432	0.032	0
Birc5	0	0.649977	0.29	0.055	0
Tmpo	0	0.646529	0.685	0.229	0
Got2	0	0.641359	0.708	0.157	0
P2ry14	0	0.639739	0.512	0.051	0
Irf5	0	0.638022	0.867	0.34	0
Ffar4	0	0.632052	0.424	0.013	0
S100a11	0	0.630113	0.985	0.624	0
Itgb7	0	0.629135	0.817	0.252	0
Creld2	0	0.628109	0.507	0.151	0
Syngr2	0	0.623805	0.922	0.37	0
Gcnt2	0	0.623556	0.479	0.07	0
Rtl8a	0	0.622465	0.44	0.038	0
Mycl	0	0.615458	0.441	0.01	0
Psma4	0	0.615387	0.905	0.444	0
Skap2	0	0.605951	0.861	0.348	0
Cycs	0	0.605916	0.848	0.354	0
Alox5ap	0	0.604228	0.975	0.513	0
Rgs10	0	0.602894	0.93	0.442	0
Lsr	0	0.591964	0.509	0.062	0
Ppfia4	0	0.591866	0.604	0.11	0
Ifi211	0	0.589478	0.629	0.139	0
Bri3bp	0	0.589136	0.626	0.114	0
Ccnd1	0	0.58767	0.698	0.19	0
Cyb5a	0	0.585688	0.875	0.369	0
Snx22	0	0.581612	0.398	0.005	0
Camk1d	0	0.578791	0.596	0.113	0
Baz1a	0	0.575752	0.782	0.276	0
Selenoh	0	0.574167	0.682	0.25	0
Grasp	0	0.573115	0.441	0.071	0
Fnbp1	0	0.571643	0.704	0.175	0
H13	0	0.571589	0.82	0.317	0
Plac8	0	0.570833	0.836	0.361	0
Hfe	0	0.567545	0.575	0.17	0
Rps11	0	0.565453	0.997	0.888	0
Hepacam2	0	0.562682	0.373	0.01	0
Tbca	0	0.561816	0.947	0.526	0
Arpc2	0	0.56065	0.99	0.745	0
Ncoa7	0	0.556598	0.502	0.115	0
Rtraf	0	0.555435	0.918	0.462	0
Slc35c2	0	0.555066	0.614	0.138	0
Gng12	0	0.554314	0.656	0.191	0
Pbx1	0	0.554181	0.467	0.031	0
Fbl	0	0.551367	0.829	0.313	0
Phf11b	0	0.549594	0.778	0.267	0
St3gal5	0	0.5469	0.489	0.059	0
Ece1	0	0.54681	0.505	0.057	0
Dpp4	0	0.545583	0.561	0.075	0
Ucp2	0	0.544068	0.957	0.548	0
Psme2	0	0.542533	0.929	0.471	0
Nr4a2	0	0.541847	0.657	0.181	0
Sdad1	0	0.537945	0.487	0.069	0
Tap2	0	0.537913	0.751	0.226	0
Vrk1	0	0.537436	0.62	0.139	0
Phf11a	0	0.537421	0.489	0.094	0
Actr3	0	0.536516	0.982	0.676	0
Prkar2a	0	0.533017	0.488	0.074	0
Arsb	0	0.53079	0.51	0.06	0
Mrpl42	0	0.527986	0.787	0.305	0
Eef1b2	0	0.526768	0.982	0.718	0
Mdh1	0	0.52635	0.82	0.333	0
Me2	0	0.522568	0.618	0.141	0
Mki67	0	0.520825	0.3	0.052	0
Twf2	0	0.515924	0.745	0.262	0
Sod1	0	0.515667	0.79	0.295	0
Slc46a3	0	0.515483	0.469	0.057	0
Efhd2	0	0.514057	0.95	0.49	0
Cd83	0	0.513657	0.88	0.416	0
Ezh2	0	0.510944	0.465	0.092	0
Anxa6	0	0.510105	0.785	0.259	0
Cpne3	0	0.499271	0.616	0.169	0
Erlin1	0	0.499058	0.512	0.081	0
1700025G04Rik	0	0.498253	0.525	0.097	0
Gm6377	0	0.495665	0.595	0.149	0
Sh3bp1	0	0.495503	0.565	0.111	0
Gltp	0	0.493362	0.892	0.424	0
Itm2c	0	0.492653	0.803	0.335	0
Klrb1b	0	0.492519	0.386	0.023	0
Zyx	0	0.489765	0.778	0.304	0
Tspan33	0	0.489177	0.427	0.033	0
Arhgap5	0	0.488924	0.522	0.088	0
C1qbp	0	0.487132	0.694	0.239	0
Kctd14	0	0.479213	0.363	0.025	0
Alyref	0	0.473946	0.608	0.182	0
Spc24	0	0.469674	0.271	0.041	0
Atp6v0a2	0	0.468981	0.506	0.086	0
Arpc5l	0	0.466751	0.817	0.309	0
Cdca8	0	0.464713	0.28	0.048	0
Plekho1	0	0.463774	0.767	0.291	0
AC163354.1	0	0.459858	0.35	0.012	0
Rpl14	0	0.459478	0.994	0.86	0
Cxcr3	0	0.457886	0.409	0.034	0
A530099J19Rik	0	0.457136	0.335	0.003	0
Mpp6	0	0.455662	0.579	0.15	0
Cystm1	0	0.452392	0.362	0.014	0
Slc8b1	0	0.452346	0.499	0.096	0
Sigmar1	0	0.45164	0.521	0.124	0
Acvrl1	0	0.44837	0.532	0.134	0
Casp6	0	0.447885	0.456	0.075	0
Dut	0	0.440597	0.412	0.103	0
Impdh2	0	0.439613	0.676	0.242	0
Tbc1d8	0	0.438303	0.448	0.059	0
Lmnb1	0	0.437992	0.656	0.153	0
Timeless	0	0.437234	0.354	0.036	0
2310040G24Rik	0	0.436572	0.382	0.035	0
Cnn2	0	0.435838	0.886	0.404	0
Ppa1	0	0.435579	0.496	0.13	0
BC035044	0	0.433965	0.448	0.059	0
Ccdc86	0	0.42937	0.491	0.127	0
Ap1s3	0	0.429036	0.415	0.037	0
Tbrg1	0	0.427031	0.675	0.208	0
Aif1	0	0.426676	0.939	0.368	0
Plp2	0	0.424405	0.588	0.165	0
Ciita	0	0.421677	0.609	0.156	0
Klrk1	0	0.419259	0.642	0.125	0
Slk	0	0.418837	0.593	0.178	0
Rbbp7	0	0.417814	0.613	0.196	0
Stard3nl	0	0.416977	0.689	0.25	0
Abhd17a	0	0.415954	0.609	0.181	0
Tbc1d9	0	0.415686	0.399	0.065	0
Slamf8	0	0.415015	0.593	0.176	0
Mvb12a	0	0.411505	0.665	0.224	0
Btla	0	0.411046	0.482	0.053	0
Bex3	0	0.410185	0.562	0.161	0
Lpcat1	0	0.410126	0.466	0.085	0
Mthfd2	0	0.407532	0.514	0.138	0
Cdca3	0	0.407522	0.241	0.038	0
Cacna1s	0	0.402268	0.309	0.015	0
Cd86	0	0.39531	0.669	0.22	0
Lsm6	0	0.391846	0.756	0.304	0
Dock10	0	0.389265	0.761	0.285	0
Ass1	0	0.385906	0.625	0.188	0
Fam149a	0	0.384021	0.294	0.007	0
Tfg	0	0.383243	0.515	0.157	0
Tor1a	0	0.377557	0.58	0.181	0
Hacd2	0	0.375989	0.486	0.118	0
Fundc1	0	0.373829	0.522	0.141	0
Znrd1	0	0.373521	0.662	0.225	0
Rab43	0	0.373192	0.404	0.07	0
Gna15	0	0.37307	0.388	0.064	0
Cdk14	0	0.372698	0.453	0.097	0
Sla	0	0.372237	0.613	0.195	0
Ppfibp2	0	0.372199	0.399	0.08	0
Rab11fip1	0	0.371552	0.426	0.072	0
Parp8	0	0.371192	0.431	0.084	0
Cnp	0	0.369805	0.648	0.198	0
Itgae	0	0.368578	0.233	0.005	0
Fgfr1	0	0.366469	0.342	0.051	0
Scimp	0	0.36502	0.453	0.11	0
Pqlc1	0	0.362361	0.484	0.118	0
Pdia5	0	0.360325	0.275	0.012	0
Ivns1abp	0	0.360042	0.504	0.133	0
Parvg	0	0.358511	0.413	0.076	0
Knstrn	0	0.35655	0.254	0.035	0
Havcr2	0	0.356259	0.345	0.052	0
Dbn1	0	0.352457	0.271	0.006	0
Dynll2	0	0.352062	0.541	0.16	0
Net1	0	0.346782	0.355	0.053	0
Plekha5	0	0.34571	0.323	0.027	0
Ccr2	0	0.343548	0.824	0.317	0
Rab30	0	0.341263	0.3	0.021	0
Anpep	0	0.341185	0.398	0.087	0
Isyna1	0	0.340612	0.444	0.117	0
Hmgn3	0	0.333258	0.382	0.071	0
Slc25a38	0	0.331579	0.346	0.052	0
Rcn2	0	0.32981	0.514	0.148	0
Map4k1	0	0.328136	0.522	0.128	0
Rtcb	0	0.322751	0.612	0.2	0
Ptrhd1	0	0.319826	0.469	0.124	0
Nmral1	0	0.31504	0.326	0.069	0
Lemd2	0	0.314314	0.382	0.086	0
Unc119b	0	0.311319	0.337	0.043	0
Cd9	0	0.311108	0.852	0.319	0
Plcb4	0	0.307072	0.284	0.017	0
Itpr1	0	0.303824	0.444	0.101	0
Mctp1	0	0.301719	0.302	0.053	0
Ryr1	0	0.300199	0.352	0.079	0
Gm9530	0	0.299978	0.238	0.021	0
Pik3cb	0	0.297811	0.295	0.045	0
Nek6	0	0.292099	0.325	0.067	0
Dna2	0	0.290658	0.295	0.042	0
Kmo	0	0.287198	0.343	0.052	0
Pla2g16	0	0.286962	0.564	0.164	0
Agpat3	0	0.284924	0.363	0.066	0
Hells	0	0.279949	0.247	0.041	0
Plpp1	0	0.278214	0.283	0.019	0
Mtmr4	0	0.277976	0.288	0.036	0
P3h2	0	0.276446	0.227	0.013	0
Kit	0	0.276377	0.218	0.012	0
Fcgrt	0	0.274739	0.649	0.208	0
Impa2	0	0.273292	0.292	0.052	0
Fmnl2	0	0.267402	0.255	0.038	0
Gm3336	0	0.267341	0.222	0.014	0
Nup210	0	0.247339	0.335	0.062	0
Nsmaf	0	0.242978	0.35	0.075	0
Slco3a1	0	0.241354	0.266	0.037	0
Prelid2	0	0.241289	0.242	0.037	0
Phf11c	0	0.234874	0.202	0.021	0
Zbtb46	0	0.233741	0.211	0.02	0
H2-Ob	0	0.230824	0.655	0.147	0
Lrrk2	0	0.23064	0.297	0.042	0
Arl6	0	0.226226	0.204	0.022	0
Polr1a	0	0.216706	0.25	0.037	0
Spint2	0	0.215193	0.442	0.085	0
Cdk1	6.48255e-308	0.364726	0.239	0.039	1.10761e-303
Fancl	1.17951e-307	0.219075	0.259	0.045	2.01532e-303
Cdc14a	1.49509e-307	0.237291	0.223	0.033	2.55451e-303
Anp32b	1.85108e-307	0.586792	0.917	0.503	3.16276e-303
Ranbp1	1.87756e-307	0.581952	0.865	0.421	3.20799e-303
Mospd1	2.06178e-306	0.25761	0.251	0.043	3.52276e-302
Rala	4.47155e-306	0.409969	0.822	0.352	7.64009e-302
Myo9a	8.46987e-306	0.247747	0.277	0.052	1.44716e-301
Eif2s1	1.79841e-305	0.383786	0.696	0.263	3.07277e-301
Actb	4.1921e-305	0.700027	0.977	0.677	7.16263e-301
Pmvk	3.98815e-303	0.263434	0.439	0.117	6.81416e-299
Cct3	2.82943e-302	0.425194	0.721	0.282	4.83436e-298
Dynlt1f	3.18314e-301	0.268143	0.371	0.089	5.43871e-297
Rpl3	1.24215e-298	0.445494	0.996	0.856	2.12234e-294
Nudt21	3.12885e-298	0.357409	0.712	0.274	5.34595e-294
Hnrnpa1	4.26019e-298	0.481516	0.928	0.502	7.27896e-294
Acox3	2.31108e-297	0.303412	0.418	0.111	3.94871e-293
Tmem50b	4.49448e-297	0.254455	0.346	0.079	7.67926e-293
Lmo1	5.90267e-297	0.258791	0.272	0.051	1.00853e-292
Prkra	1.40265e-296	0.288794	0.353	0.084	2.39657e-292
Rbpj	3.50459e-296	0.384356	0.664	0.244	5.98794e-292
Rplp0	2.57716e-295	0.406704	0.995	0.868	4.40333e-291
Stmn1	3.67235e-294	0.939744	0.519	0.184	6.27458e-290
Mtmr14	1.00927e-293	0.287	0.33	0.074	1.72443e-289
Exosc8	1.04859e-293	0.367272	0.517	0.166	1.79161e-289
Nap1l1	4.57602e-293	0.4861	0.894	0.46	7.81859e-289
Glipr1	4.58172e-293	0.424222	0.766	0.319	7.82832e-289
Rbm17	1.93292e-291	0.345686	0.667	0.25	3.30258e-287
Mlec	2.94807e-291	0.320152	0.482	0.145	5.03707e-287
Txndc5	3.57165e-291	0.260771	0.46	0.133	6.10252e-287
Ccnb2	8.57553e-291	0.481031	0.231	0.039	1.46521e-286
Slc36a3os	3.70732e-290	0.233787	0.249	0.044	6.33433e-286
Srebf2	6.42419e-290	0.262326	0.506	0.151	1.09764e-285
Hcls1	1.72181e-289	0.433109	0.869	0.413	2.94189e-285
Arhgap18	2.73596e-288	0.308539	0.473	0.14	4.67465e-284
Ccna2	3.41533e-288	0.332675	0.209	0.032	5.83543e-284
2022-09-09	6.77517e-288	0.34644	0.611	0.216	1.15761e-283
Tifab	4.70245e-287	0.352674	0.408	0.111	8.0346e-283
Asf1b	1.34239e-286	0.331153	0.239	0.042	2.2936e-282
Ctnnbip1	1.49356e-286	0.268013	0.377	0.096	2.5519e-282
Ppib	7.60647e-286	0.570193	0.956	0.57	1.29964e-281
Pigf	2.9824e-284	0.246556	0.301	0.065	5.09573e-280
Eif5a	1.10753e-283	0.545148	0.957	0.62	1.89233e-279
Arl3	1.28749e-283	0.319679	0.442	0.128	2.1998e-279
Set	1.87133e-283	0.489032	0.88	0.447	3.19736e-279
Gtpbp4	2.73608e-283	0.321591	0.602	0.208	4.67486e-279
Jpt2	6.4097e-283	0.2508	0.294	0.063	1.09516e-278
Nono	1.81105e-281	0.35728	0.743	0.304	3.09436e-277
Fuca1	2.65619e-281	0.388545	0.774	0.324	4.53836e-277
Dpy19l1	3.78465e-281	0.250292	0.312	0.069	6.46646e-277
Hint3	4.09951e-281	0.273316	0.43	0.12	7.00441e-277
Prpf19	4.24295e-280	0.298418	0.463	0.138	7.2495e-276
Manf	5.06694e-280	0.705108	0.799	0.382	8.65738e-276
Top2a	5.41149e-280	0.632168	0.295	0.066	9.24607e-276
Cs	7.82458e-280	0.289094	0.575	0.195	1.33691e-275
Snrpd1	2.64676e-279	0.439175	0.755	0.332	4.52225e-275
Sema4a	2.78151e-279	0.256671	0.482	0.143	4.75249e-275
Nudc	2.36209e-277	0.395445	0.709	0.291	4.03587e-273
Psmb7	4.00114e-276	0.443619	0.836	0.397	6.83635e-272
Ncf4	6.4152e-276	0.326624	0.703	0.274	1.0961e-271
Hmgn1	1.00438e-274	0.297472	0.747	0.294	1.71608e-270
Dek	1.04319e-274	0.550743	0.837	0.419	1.78239e-270
Cysltr1	2.46703e-274	0.305674	0.375	0.098	4.21517e-270
Tiam1	6.66314e-272	0.231278	0.262	0.051	1.13846e-267
Tyms	1.06389e-271	0.307877	0.248	0.047	1.81777e-267
M6pr	1.79085e-271	0.453457	0.83	0.385	3.05984e-267
Snrpa1	1.71162e-269	0.327092	0.548	0.188	2.92447e-265
Arhgef6	3.00896e-269	0.252129	0.469	0.14	5.14111e-265
Sumo3	4.37105e-269	0.36075	0.695	0.279	7.46838e-265
Rasgrp4	4.57059e-269	0.233386	0.322	0.074	7.8093e-265
Gar1	4.93231e-269	0.265858	0.442	0.129	8.42735e-265
Slc25a5	2.3351e-268	0.510577	0.965	0.664	3.98974e-264
Psma5	2.40831e-268	0.407039	0.85	0.395	4.11485e-264
Gpr65	5.12802e-268	0.316304	0.417	0.119	8.76174e-264
Atp5c1	1.02254e-267	0.468035	0.945	0.553	1.74711e-263
Cnih4	1.02582e-267	0.371922	0.752	0.317	1.75272e-263
Srsf9	2.16529e-267	0.348655	0.676	0.265	3.69961e-263
Stx17	2.26983e-266	0.200578	0.247	0.047	3.87823e-262
Tacc3	2.73901e-266	0.255375	0.22	0.038	4.67988e-262
Tk1	3.9344e-266	0.298342	0.215	0.036	6.72232e-262
Cltb	5.481e-266	0.258964	0.501	0.159	9.36483e-262
Glrx	1.34292e-265	0.305184	0.624	0.231	2.29452e-261
Exosc5	1.29396e-264	0.227706	0.445	0.131	2.21087e-260
Scand1	2.18266e-264	0.413063	0.878	0.437	3.72929e-260
Ndufaf6	2.33267e-264	0.20737	0.226	0.04	3.9856e-260
Slamf7	3.60895e-264	0.322122	0.701	0.273	6.16626e-260
Il18	4.08613e-264	0.321854	0.382	0.105	6.98156e-260
Ddost	1.3616e-263	0.392418	0.733	0.31	2.32643e-259
Ubfd1	1.54239e-263	0.267218	0.375	0.101	2.63534e-259
Eif2b2	8.08931e-263	0.253459	0.401	0.112	1.38214e-258
Prmt1	8.55795e-263	0.307896	0.582	0.209	1.46221e-258
Akr7a5	1.53626e-262	0.267134	0.343	0.087	2.62485e-258
Hspe1	1.55494e-262	0.508015	0.96	0.604	2.65676e-258
Anp32e	1.0799e-261	0.416032	0.665	0.269	1.84512e-257
Serf2	2.41347e-261	0.436973	0.989	0.812	4.12366e-257
Nudt14	2.92627e-261	0.22267	0.313	0.073	4.99982e-257
Runx3	5.45263e-261	0.231661	0.413	0.114	9.31637e-257
Prr5l	3.3053e-259	0.205758	0.232	0.042	5.64743e-255
Cyth4	5.95662e-259	0.371848	0.781	0.34	1.01775e-254
Oaz1	1.45968e-258	0.404945	0.992	0.847	2.49401e-254
Pdia6	2.47026e-258	0.636111	0.818	0.403	4.22069e-254
Eif3g	6.41096e-258	0.351826	0.77	0.336	1.09538e-253
Pld4	9.58468e-258	0.353682	0.891	0.408	1.63764e-253
Clec12a	1.35569e-257	0.309205	0.796	0.33	2.31633e-253
Fbxo4	1.61896e-257	0.249537	0.345	0.088	2.76615e-253
Sfxn1	1.38691e-256	0.253951	0.38	0.104	2.36968e-252
Ifi35	2.52848e-256	0.373436	0.707	0.295	4.32017e-252
Ruvbl1	8.62727e-256	0.241594	0.365	0.098	1.47406e-251
Rps5	1.23363e-255	0.372324	0.994	0.884	2.10777e-251
Bcl2a1d	6.61611e-255	0.314096	0.473	0.149	1.13043e-250
Spop	8.59921e-255	0.331102	0.735	0.308	1.46926e-250
Cd2ap	1.88719e-253	0.263351	0.522	0.175	3.22446e-249
Pdlim2	2.42408e-253	0.242106	0.382	0.105	4.14178e-249
Ccdc107	7.12135e-253	0.268386	0.413	0.121	1.21675e-248
Tomm70a	1.4847e-251	0.272707	0.479	0.155	2.53675e-247
Khk	1.5433e-251	0.258715	0.361	0.096	2.63688e-247
Plekho2	1.61963e-251	0.310856	0.669	0.263	2.76731e-247
Npm1	1.84605e-251	0.438938	0.985	0.73	3.15416e-247
G3bp1	6.83939e-251	0.344852	0.772	0.339	1.16858e-246
Pkp3	1.10528e-248	0.205367	0.363	0.095	1.88848e-244
Ran	2.56937e-248	0.543644	0.912	0.533	4.39003e-244
Coro2a	3.04848e-248	0.224245	0.377	0.103	5.20863e-244
Fam105a	3.56251e-248	0.349524	0.77	0.336	6.0869e-244
Uchl3	3.92189e-248	0.228624	0.528	0.179	6.70094e-244
Bak1	4.44083e-248	0.316345	0.511	0.175	7.5876e-244
Arl4a	1.53836e-247	0.253072	0.417	0.122	2.62845e-243
Atp5f1	1.67626e-247	0.474313	0.952	0.584	2.86406e-243
Pgk1	4.84595e-247	0.350212	0.798	0.358	8.2798e-243
Ptpa	3.74905e-246	0.269699	0.501	0.169	6.40562e-242
Gusb	1.03292e-245	0.342032	0.748	0.314	1.76485e-241
Mcm5	8.18717e-245	0.252318	0.273	0.061	1.39886e-240
Ube2n	1.85727e-244	0.37647	0.799	0.368	3.17333e-240
Iqgap2	2.21887e-244	0.259857	0.449	0.14	3.79117e-240
Ywhah	1.96579e-243	0.438844	0.858	0.438	3.35875e-239
Kctd12	5.50445e-243	0.262655	0.728	0.303	9.4049e-239
Mfsd14a	6.3501e-243	0.228602	0.464	0.148	1.08498e-238
Nuak2	8.48095e-243	0.236934	0.437	0.133	1.44906e-238
Acsl5	1.07539e-242	0.297026	0.534	0.188	1.83741e-238
Btf3	7.12724e-242	0.420312	0.982	0.773	1.21776e-237
Arhgdia	1.54497e-241	0.438172	0.933	0.519	2.63974e-237
Dnajc8	2.32409e-240	0.342823	0.85	0.411	3.97093e-236
Coq2	2.77819e-240	0.241268	0.373	0.105	4.74682e-236
Cct7	3.52716e-240	0.350232	0.774	0.349	6.02651e-236
Hipk2	2.07056e-239	0.219511	0.28	0.065	3.53776e-235
Calm1	6.21199e-239	0.427687	0.99	0.818	1.06138e-234
Cox7b	1.26431e-238	0.441725	0.922	0.522	2.16021e-234
Nhp2	2.54624e-238	0.324317	0.689	0.284	4.3505e-234
Apobec3	8.93578e-237	0.226707	0.744	0.306	1.52677e-232
Tm2d2	1.42949e-236	0.285291	0.634	0.248	2.44243e-232
Sri	1.46594e-234	0.436958	0.888	0.481	2.50471e-230
Uqcrfs1	3.45646e-234	0.368731	0.872	0.444	5.9057e-230
Pa2g4	3.59091e-234	0.32415	0.608	0.237	6.13542e-230
Selplg	8.2391e-234	0.345169	0.906	0.477	1.40773e-229
Cytip	2.23575e-233	0.306597	0.865	0.403	3.82001e-229
Sec61b	2.74746e-233	0.492814	0.964	0.638	4.69431e-229
Phf10	9.65418e-233	0.211226	0.284	0.068	1.64951e-228
Trpv2	1.30812e-232	0.256342	0.424	0.134	2.23506e-228
Polr1d	2.42456e-232	0.399624	0.93	0.535	4.1426e-228
Polr1c	2.63482e-231	0.227717	0.441	0.14	4.50185e-227
Tmsb10	1.16087e-230	0.480861	0.994	0.798	1.98346e-226
Tubb6	1.85941e-229	0.346459	0.611	0.244	3.17698e-225
Ube2e1	2.0432e-229	0.28703	0.646	0.261	3.49101e-225
Lsm2	7.94698e-229	0.304921	0.486	0.17	1.35782e-224
Atg3	9.98359e-229	0.287157	0.75	0.329	1.7058e-224
Mpc2	1.10272e-228	0.31687	0.832	0.394	1.88411e-224
Eif4h	1.40829e-228	0.334673	0.763	0.346	2.4062e-224
Efr3a	1.95975e-228	0.247841	0.495	0.17	3.34843e-224
Erp29	3.30212e-227	0.425773	0.915	0.504	5.64201e-223
Trim30a	1.09647e-225	0.353496	0.693	0.296	1.87342e-221
Ncaph2	2.73203e-225	0.238388	0.454	0.15	4.66794e-221
U2af1	9.46979e-225	0.361418	0.781	0.369	1.61801e-220
Atp5b	1.9655e-224	0.454677	0.96	0.631	3.35824e-220
Tmed3	2.17477e-224	0.295213	0.659	0.269	3.71581e-220
Akap9	2.4443e-224	0.203417	0.479	0.161	4.17633e-220
Tyk2	1.63536e-223	0.210044	0.288	0.071	2.79418e-219
Cops4	8.52826e-223	0.24166	0.517	0.185	1.45714e-218
Cct8	1.63477e-222	0.310572	0.775	0.35	2.79317e-218
Uqcrc2	4.44252e-222	0.263662	0.706	0.3	7.59049e-218
Hnrnpd	6.86356e-222	0.278702	0.692	0.293	1.17271e-217
Dnajc7	7.03276e-222	0.240734	0.664	0.272	1.20162e-217
Cbfb	7.77605e-222	0.22485	0.499	0.175	1.32862e-217
Agpat4	3.19042e-221	0.244406	0.533	0.193	5.45115e-217
Kif23	5.06398e-221	0.300781	0.257	0.06	8.65231e-217
Bcl7c	2.31694e-220	0.221138	0.453	0.15	3.95872e-216
Suclg1	2.95587e-220	0.228514	0.602	0.233	5.05039e-216
Ndufa6	4.01983e-220	0.387947	0.945	0.571	6.86828e-216
Asap1	4.69723e-220	0.266695	0.602	0.235	8.02568e-216
Rtca	5.7981e-220	0.205008	0.319	0.085	9.90664e-216
Racgap1	1.71811e-219	0.286792	0.242	0.054	2.93556e-215
Snrpd2	2.72636e-219	0.33053	0.865	0.438	4.65825e-215
Hsp90ab1	5.40349e-219	0.42043	0.993	0.803	9.2324e-215
Hspd1	1.06504e-218	0.332687	0.713	0.313	1.81973e-214
Srsf3	1.71249e-218	0.388413	0.909	0.499	2.92596e-214
Lrrc58	2.49325e-218	0.282228	0.635	0.261	4.25996e-214
Cd180	4.19324e-217	0.275402	0.459	0.158	7.16456e-213
Ssr2	4.38375e-217	0.317236	0.706	0.306	7.49008e-213
Glrx3	9.77092e-217	0.313579	0.724	0.319	1.66946e-212
Cct5	1.9434e-216	0.342364	0.831	0.412	3.32049e-212
Dapp1	2.60827e-216	0.208671	0.467	0.157	4.45648e-212
Rpl4	6.15296e-216	0.35018	0.991	0.848	1.0513e-211
Rps6	1.86376e-215	0.32904	0.994	0.885	3.18443e-211
Sp140	2.04296e-214	0.29883	0.553	0.211	3.49059e-210
Odc1	5.16009e-214	0.244159	0.497	0.178	8.81653e-210
Gpi1	8.38211e-214	0.310209	0.832	0.402	1.43217e-209
Dnajc3	1.50888e-213	0.404303	0.615	0.259	2.57807e-209
Ube2c	2.32037e-213	0.580893	0.257	0.063	3.96458e-209
Nt5c	2.43443e-213	0.258175	0.71	0.306	4.15947e-209
Ptcd2	1.18134e-212	0.220778	0.352	0.103	2.01843e-208
Gtf2e2	1.22081e-212	0.213052	0.357	0.105	2.08588e-208
Cyp27a1	1.42742e-212	0.201047	0.265	0.063	2.43888e-208
Mndal	1.75431e-212	0.409148	0.84	0.424	2.99742e-208
Paics	9.19111e-212	0.250742	0.416	0.137	1.57039e-207
Gtf3c6	1.38424e-211	0.222371	0.506	0.184	2.36512e-207
Hsp90b1	1.59045e-211	0.591998	0.918	0.552	2.71744e-207
Pi4k2a	4.90108e-211	0.247208	0.392	0.124	8.37398e-207
Nadk	4.76111e-210	0.233512	0.63	0.251	8.13483e-206
Glod4	5.0445e-210	0.236436	0.462	0.161	8.61903e-206
Psma7	1.55016e-209	0.416793	0.943	0.571	2.6486e-205
Mrps15	1.7601e-209	0.251374	0.604	0.243	3.00731e-205
Uvrag	1.17753e-208	0.20801	0.541	0.2	2.01193e-204
Dnajc2	3.03556e-208	0.237658	0.582	0.229	5.18656e-204
Gfer	3.41998e-208	0.222018	0.415	0.136	5.84338e-204
Pin1	3.86698e-208	0.245319	0.563	0.219	6.60712e-204
Vrk2	6.27736e-208	0.225019	0.377	0.117	1.07255e-203
Apobr	6.9589e-208	0.209667	0.316	0.088	1.189e-203
Pip4k2a	2.91592e-207	0.262052	0.561	0.217	4.98214e-203
Tspo	8.01137e-207	0.539149	0.942	0.624	1.36882e-202
Snrpa	1.70989e-206	0.242146	0.425	0.142	2.92152e-202
Gnb2	2.22685e-206	0.425403	0.948	0.597	3.80479e-202
Gpsm3	6.50536e-206	0.318218	0.833	0.414	1.11151e-201
Fam46c	2.94929e-205	0.217499	0.406	0.131	5.03915e-201
Avpi1	3.89471e-205	0.223203	0.456	0.157	6.6545e-201
Psma3	1.61202e-204	0.403682	0.94	0.578	2.75429e-200
Lsm4	1.82899e-204	0.328052	0.85	0.44	3.12502e-200
Pold4	2.36219e-204	0.247394	0.673	0.287	4.03605e-200
Apex1	3.00012e-204	0.254829	0.376	0.119	5.126e-200
Slc35b1	9.58037e-204	0.320316	0.485	0.182	1.6369e-199
Spag9	1.29558e-203	0.29684	0.699	0.308	2.21363e-199
Prdx2	2.32067e-203	0.320363	0.864	0.443	3.9651e-199
Arf5	2.63051e-203	0.384031	0.956	0.592	4.49449e-199
Bmyc	1.16957e-202	0.20629	0.504	0.183	1.99834e-198
Lman2	1.29281e-202	0.303496	0.76	0.357	2.20889e-198
Mrpl28	1.49053e-202	0.279295	0.577	0.234	2.54673e-198
Ndufb11	3.17283e-202	0.330909	0.895	0.49	5.42109e-198
Churc1	5.3659e-202	0.240512	0.621	0.253	9.16818e-198
Psma1	1.98724e-201	0.339821	0.856	0.449	3.3954e-197
Ramp1	4.06507e-201	0.213928	0.495	0.178	6.94559e-197
Slc25a4	4.22102e-201	0.278578	0.762	0.347	7.21203e-197
Pcbd2	1.36912e-200	0.245056	0.58	0.233	2.33927e-196
Psmb4	1.47775e-200	0.312511	0.85	0.427	2.52488e-196
Hmgb2	2.96246e-200	0.975698	0.777	0.432	5.06165e-196
Swi5	3.37864e-200	0.32336	0.855	0.437	5.77274e-196
Mrps14	3.39759e-200	0.298908	0.835	0.405	5.80513e-196
Mbd3	1.29465e-199	0.216812	0.445	0.155	2.21204e-195
Mrps28	1.62269e-199	0.236288	0.502	0.188	2.77253e-195
Fen1	1.84355e-199	0.214477	0.27	0.069	3.14989e-195
Dnajb11	2.3273e-199	0.337161	0.671	0.301	3.97642e-195
Phb2	5.48642e-199	0.286747	0.786	0.372	9.3741e-195
Nsun2	7.96464e-199	0.208072	0.422	0.141	1.36084e-194
Ndufs8	1.49062e-198	0.26958	0.735	0.331	2.54687e-194
Smc4	1.69417e-198	0.284606	0.579	0.235	2.89466e-194
Scarb1	2.39062e-198	0.202099	0.352	0.107	4.08461e-194
Meaf6	6.45594e-198	0.207237	0.349	0.106	1.10306e-193
Bnip2	1.26329e-197	0.254195	0.634	0.267	2.15846e-193
Nars	1.3189e-197	0.252282	0.581	0.234	2.25348e-193
Myl12b	2.05847e-197	0.286105	0.883	0.468	3.5171e-193
Chchd1	2.50989e-197	0.256486	0.692	0.305	4.28839e-193
BC147527	2.82439e-197	0.206666	0.242	0.057	4.82575e-193
Rab11a	9.26796e-197	0.262613	0.771	0.356	1.58352e-192
Ifngr1	1.90351e-196	0.301105	0.849	0.453	3.25234e-192
Phyh	2.15901e-196	0.244055	0.416	0.142	3.68888e-192
Tnfaip8	2.38651e-196	0.265552	0.679	0.298	4.07758e-192
Rpl10a	2.61134e-196	0.333681	0.993	0.847	4.46174e-192
Tmem219	1.63712e-195	0.263757	0.623	0.264	2.79718e-191
Rpn1	1.82406e-195	0.273733	0.554	0.222	3.11659e-191
Arpc3	6.58288e-195	0.386352	0.971	0.709	1.12475e-190
Smc2	3.32332e-194	0.360836	0.327	0.101	5.67822e-190
Cacybp	2.1867e-193	0.249017	0.682	0.299	3.7362e-189
Phactr2	2.46234e-193	0.207202	0.266	0.069	4.20715e-189
Vasp	1.49484e-192	0.232623	0.778	0.369	2.55408e-188
Alcam	6.19512e-192	0.233984	0.505	0.189	1.0585e-187
Srsf7	1.04622e-191	0.283432	0.749	0.355	1.78758e-187
Arid4a	1.58777e-191	0.218133	0.638	0.271	2.71287e-187
Selenos	1.71603e-191	0.265344	0.717	0.327	2.93201e-187
Tm6sf1	1.74796e-191	0.27589	0.725	0.329	2.98656e-187
Mcm3	3.67374e-191	0.289823	0.314	0.093	6.27695e-187
Cyb5r4	6.16474e-191	0.235446	0.544	0.218	1.05331e-186
Coro1b	2.0216e-190	0.285107	0.754	0.353	3.45411e-186
Csnk2b	2.68337e-190	0.24623	0.682	0.303	4.58481e-186
Tipin	7.33687e-190	0.248794	0.326	0.098	1.25358e-185
Eif3l	8.28472e-190	0.226982	0.577	0.236	1.41553e-185
Stx16	7.16554e-189	0.210753	0.473	0.173	1.2243e-184
Psmb1	7.25499e-189	0.368449	0.958	0.621	1.23959e-184
Tmem173	9.99346e-189	0.216963	0.375	0.122	1.70748e-184
Ctnna1	6.26009e-188	0.210429	0.493	0.185	1.0696e-183
Mrpl18	8.24156e-187	0.286146	0.708	0.327	1.40815e-182
Arhgap22	1.02785e-186	0.20374	0.262	0.069	1.75618e-182
Ccdc12	1.87757e-186	0.306167	0.906	0.497	3.20802e-182
Gng2	4.38464e-186	0.211769	0.725	0.322	7.4916e-182
Thoc7	4.94957e-186	0.217669	0.563	0.227	8.45684e-182
Ssrp1	1.23374e-185	0.239233	0.556	0.228	2.10798e-181
Ogfr	3.27981e-185	0.223487	0.527	0.206	5.60389e-181
Myd88	4.89183e-185	0.252978	0.47	0.177	8.35819e-181
Cct4	5.12165e-185	0.292385	0.827	0.417	8.75086e-181
Cdc37	9.10258e-185	0.268959	0.802	0.394	1.55527e-180
Snx20	9.44137e-185	0.249003	0.703	0.32	1.61315e-180
Trappc4	9.66983e-185	0.226056	0.674	0.3	1.65219e-180
Eif3d	3.57393e-184	0.209644	0.608	0.255	6.10641e-180
Mcm6	6.6714e-184	0.25273	0.299	0.087	1.13988e-179
Ndufa9	2.38004e-183	0.217743	0.538	0.215	4.06653e-179
Ywhae	2.60025e-183	0.342116	0.906	0.501	4.44278e-179
Oxct1	2.79825e-183	0.225364	0.505	0.194	4.7811e-179
Zfp706	3.12714e-183	0.249663	0.833	0.422	5.34303e-179
Sec11c	3.93568e-183	0.310857	0.862	0.448	6.7245e-179
Nop58	4.92935e-182	0.202299	0.488	0.184	8.4223e-178
Nans	8.32876e-182	0.229982	0.509	0.2	1.42305e-177
5031439G07Rik	6.8443e-181	0.228614	0.518	0.205	1.16942e-176
Tubb5	1.26666e-180	0.772116	0.782	0.458	2.16422e-176
Cfl1	1.32576e-180	0.369675	0.991	0.799	2.26519e-176
Nucks1	1.91019e-180	0.318388	0.58	0.251	3.26374e-176
Mrpl12	2.64819e-180	0.219338	0.584	0.243	4.52469e-176
Tmem258	3.91889e-180	0.29571	0.827	0.425	6.69582e-176
Uqcrb	1.4646e-179	0.371614	0.951	0.588	2.50242e-175
Sdhd	2.88647e-179	0.233884	0.649	0.284	4.93183e-175
Bin3	1.19569e-178	0.207735	0.446	0.165	2.04295e-174
Gars	7.0462e-178	0.207896	0.406	0.143	1.20391e-173
Atp5o.1	8.41304e-178	0.285412	0.86	0.452	1.43745e-173
Mtch1	4.68458e-177	0.227385	0.482	0.186	8.00408e-173
St3gal4	5.91808e-176	0.211388	0.409	0.144	1.01116e-171
Ostc	7.23223e-176	0.29311	0.746	0.361	1.2357e-171
Stx7	5.66112e-175	0.23716	0.733	0.34	9.67259e-171
Syce2	7.05444e-175	0.252506	0.257	0.071	1.20532e-170
Ssr4	2.73486e-174	0.338784	0.897	0.505	4.67278e-170
Pgam1	4.06757e-174	0.241496	0.772	0.366	6.94985e-170
Ddx39	7.38949e-174	0.212704	0.499	0.198	1.26257e-169
Fkbp4	1.46361e-173	0.202665	0.49	0.192	2.50072e-169
Spcs3	2.62869e-173	0.204838	0.403	0.143	4.49138e-169
Eif2s2	2.70389e-173	0.270369	0.839	0.433	4.61986e-169
Nfu1	1.32749e-172	0.203918	0.561	0.233	2.26815e-168
Cope	2.3684e-172	0.288359	0.771	0.379	4.04665e-168
Cisd1	2.50171e-172	0.206189	0.402	0.144	4.27442e-168
Hnrnpab	4.69268e-172	0.310224	0.783	0.407	8.01791e-168
Rpsa	1.02506e-171	0.279335	0.992	0.85	1.75142e-167
Mia2	5.80859e-171	0.227354	0.645	0.289	9.92456e-167
Mcm7	6.67916e-171	0.207323	0.241	0.063	1.1412e-166
Hmgn2	7.03835e-171	0.226142	0.383	0.134	1.20257e-166
Ube2s	1.00758e-170	0.424728	0.795	0.432	1.72155e-166
Papd4	3.01421e-170	0.201093	0.459	0.175	5.15009e-166
Ube2m	3.33824e-170	0.200475	0.463	0.177	5.70372e-166
Hspa5	3.56294e-170	0.641024	0.929	0.634	6.08764e-166
Tagln2	6.21081e-170	0.395842	0.917	0.577	1.06118e-165
Psmb5	9.08445e-170	0.269747	0.865	0.449	1.55217e-165
Calr	2.32876e-169	0.487694	0.903	0.563	3.97891e-165
Atp5g3	3.74314e-169	0.246057	0.792	0.399	6.39554e-165
Rpl28	4.39764e-169	0.330089	0.992	0.851	7.5138e-165
Lig1	7.8203e-169	0.25596	0.223	0.057	1.33618e-164
Dctn3	1.37393e-168	0.245243	0.773	0.378	2.3475e-164
Pcbp2	1.54689e-168	0.310978	0.928	0.565	2.64302e-164
Eif3i	7.00651e-168	0.26823	0.841	0.444	1.19713e-163
Ywhaz	9.09977e-168	0.203498	0.818	0.411	1.55479e-163
Nelfe	2.65174e-167	0.212253	0.334	0.11	4.53077e-163
Ogfrl1	2.69077e-167	0.210984	0.464	0.179	4.59744e-163
Hat1	9.14233e-167	0.250681	0.375	0.134	1.56206e-162
Sec61g	1.28192e-166	0.385678	0.958	0.646	2.19029e-162
Ndufa12	1.28777e-166	0.224466	0.729	0.344	2.20028e-162
Khdrbs1	1.81572e-166	0.213561	0.732	0.346	3.10234e-162
Tcp1	2.35732e-166	0.227012	0.712	0.336	4.02772e-162
Rpn2	7.12862e-166	0.231568	0.72	0.339	1.218e-161
Plekhj1	7.62312e-166	0.208861	0.735	0.351	1.30249e-161
Psmd14	2.27406e-165	0.218668	0.571	0.246	3.88545e-161
Rab10	2.12798e-164	0.207296	0.707	0.33	3.63587e-160
Eif3m	5.79158e-164	0.255179	0.856	0.464	9.8955e-160
Anxa7	1.20149e-163	0.222145	0.611	0.269	2.05287e-159
Got1	6.27852e-163	0.208044	0.438	0.167	1.07275e-158
Spg21	9.23034e-163	0.212712	0.698	0.324	1.5771e-158
Pitpna	6.14487e-162	0.240926	0.864	0.442	1.04991e-157
Tapbp	1.33198e-161	0.231795	0.801	0.405	2.27582e-157
Lap3	1.45078e-161	0.226477	0.302	0.096	2.47881e-157
Anapc5	2.39636e-161	0.219017	0.543	0.233	4.09443e-157
Clic1	3.53451e-161	0.366256	0.969	0.681	6.03906e-157
Mgat2	7.58799e-161	0.209057	0.54	0.228	1.29648e-156
Magt1	7.91526e-161	0.238312	0.531	0.223	1.3524e-156
Txn2	1.93743e-160	0.214862	0.69	0.322	3.31029e-156
Rps27l	9.57298e-160	0.262157	0.941	0.561	1.63564e-155
Copz1	3.76413e-159	0.208373	0.56	0.242	6.4314e-155
Gmnn	7.06259e-159	0.254925	0.336	0.117	1.20671e-154
Xbp1	8.30617e-159	0.202145	0.596	0.264	1.41919e-154
Wdr1	1.13151e-158	0.236614	0.796	0.398	1.9333e-154
Banf1	1.47213e-158	0.213777	0.609	0.272	2.51529e-154
Psmb2	1.95283e-158	0.310547	0.876	0.485	3.3366e-154
Gnai2	7.00571e-158	0.348836	0.967	0.655	1.197e-153
Nucb2	1.0231e-157	0.243334	0.325	0.11	1.74806e-153
Tbcb	1.36985e-157	0.250548	0.747	0.363	2.34053e-153
Coro1a	1.24174e-156	0.338546	0.98	0.746	2.12164e-152
Vdac3	1.72375e-156	0.217863	0.701	0.333	2.9452e-152
Pcbp1	7.85992e-156	0.264814	0.858	0.468	1.34295e-151
1110008F13Rik	9.52834e-156	0.239049	0.826	0.426	1.62801e-151
Cdk4	3.562e-155	0.257845	0.569	0.257	6.08603e-151
Mrpl54	8.76426e-155	0.212317	0.717	0.344	1.49746e-150
Dpy30	1.4583e-153	0.204113	0.556	0.247	2.49165e-149
Ssr3	1.99861e-152	0.214069	0.656	0.308	3.41483e-148
Vdac2	2.27301e-152	0.248399	0.842	0.442	3.88366e-148
Eif3k	5.83347e-152	0.311151	0.964	0.644	9.96707e-148
Bcl2a1a	9.03575e-152	0.256481	0.244	0.07	1.54385e-147
Prpf40a	5.34768e-151	0.200462	0.684	0.324	9.13705e-147
Srp72	5.81654e-151	0.217188	0.499	0.21	9.93815e-147
Cd48	5.28681e-150	0.252594	0.848	0.455	9.03305e-146
Ndufab1	3.64284e-149	0.20315	0.738	0.362	6.22416e-145
Park7	4.34791e-149	0.241867	0.875	0.477	7.42885e-145
P4hb	4.89624e-149	0.214094	0.664	0.313	8.36571e-145
Rheb	8.42672e-149	0.213357	0.77	0.384	1.43979e-144
Clic4	1.1421e-148	0.208122	0.577	0.261	1.95139e-144
Fkbp2	1.26198e-148	0.249534	0.708	0.348	2.15622e-144
Pebp1	4.24992e-147	0.21221	0.76	0.378	7.26141e-143
Rps3	9.3249e-146	0.217673	0.996	0.891	1.59325e-141
Snrpf	9.50109e-146	0.267149	0.898	0.541	1.62336e-141
Ccdc34	1.02183e-145	0.208567	0.265	0.083	1.7459e-141
Ndufa4	1.06444e-142	0.308821	0.951	0.62	1.81869e-138
Hnrnpc	5.44161e-141	0.203974	0.798	0.414	9.29754e-137
Capzb	3.54371e-139	0.304568	0.961	0.627	6.05478e-135
Usp18	6.22267e-139	0.374227	0.4	0.162	1.06321e-134
Minos1	1.58193e-138	0.254614	0.902	0.53	2.70289e-134
Snrpe	5.08091e-138	0.271459	0.906	0.558	8.68123e-134
Snx3	2.30643e-137	0.248804	0.9	0.503	3.94077e-133
Atp5g2	5.48658e-137	0.296497	0.951	0.615	9.37438e-133
Eef1d	1.12416e-136	0.234637	0.918	0.555	1.92074e-132
H2afv	2.47404e-136	0.368216	0.63	0.322	4.22715e-132
Ybx1	1.83063e-135	0.337224	0.966	0.688	3.12781e-131
Abracl	2.71533e-135	0.2574	0.923	0.555	4.63942e-131
Dck	3.10465e-135	0.203094	0.412	0.167	5.30461e-131
Sh3bgrl3	5.27912e-135	0.291581	0.991	0.815	9.0199e-131
Eif3e	8.6512e-135	0.210028	0.915	0.539	1.47814e-130
Prelid1	3.66951e-134	0.220411	0.831	0.441	6.26973e-130
Pdia4	9.64746e-134	0.259995	0.42	0.176	1.64837e-129
Eif3h	2.3769e-133	0.268947	0.952	0.627	4.06116e-129
Anxa2	7.83885e-133	0.234594	0.921	0.523	1.33935e-128
Ppp1ca	1.85204e-131	0.293721	0.937	0.595	3.1644e-127
Psmb3	2.33948e-131	0.232626	0.853	0.481	3.99723e-127
Hnrnpa2b1	1.23591e-130	0.288681	0.948	0.661	2.11167e-126
Tpm3	5.62459e-130	0.239212	0.889	0.518	9.61018e-126
Stat1	4.10035e-129	0.240536	0.586	0.284	7.00587e-125
Spi1	2.45864e-128	0.203847	0.92	0.502	4.20083e-124
Hnrnpa3	4.20956e-128	0.264478	0.903	0.547	7.19245e-124
Cenpa	4.76866e-128	0.367595	0.368	0.151	8.14773e-124
Naca	2.96677e-127	0.266415	0.988	0.801	5.06903e-123
1810037I17Rik	2.15639e-126	0.212552	0.828	0.464	3.6844e-122
Irf7	1.07682e-125	0.486312	0.632	0.333	1.83985e-121
Rpl15	1.34639e-125	0.24332	0.988	0.857	2.30045e-121
Cox7c	5.10589e-125	0.28929	0.966	0.703	8.72393e-121
Spcs2	4.13406e-124	0.241338	0.826	0.453	7.06345e-120
Atp6v0e	1.20496e-123	0.272327	0.953	0.615	2.05879e-119
Fam49b	7.52673e-123	0.216458	0.905	0.53	1.28602e-118
Atp5g1	1.10699e-122	0.236726	0.916	0.532	1.8914e-118
Eef1g	6.73792e-122	0.255718	0.968	0.719	1.15124e-117
Dnajb14	2.3533e-118	0.219569	0.425	0.185	4.02085e-114
Sumo2	2.41172e-116	0.253294	0.926	0.6	4.12066e-112
Cox6a1	2.27434e-114	0.26505	0.959	0.673	3.88594e-110
Hint1	1.00527e-112	0.286036	0.949	0.652	1.7176e-108
Rbm3	7.86371e-112	0.244815	0.962	0.697	1.34359e-107
Hnrnpf	3.81148e-111	0.251606	0.94	0.643	6.5123e-107
Atp5h	2.34607e-109	0.253548	0.969	0.701	4.0085e-105
Rpl32	5.04003e-109	0.20896	0.995	0.892	8.61139e-105
Npc2	6.98146e-109	0.209193	0.979	0.656	1.19285e-104
Rpl22	8.0304e-109	0.217978	0.987	0.821	1.37207e-104
Nedd8	3.30162e-108	0.225012	0.921	0.552	5.64115e-104
Cox5b	7.26395e-108	0.227152	0.907	0.557	1.24112e-103
Cox6c	3.25395e-107	0.251833	0.964	0.679	5.55969e-103
Snrpb	1.82027e-106	0.226905	0.903	0.574	3.11011e-102
Atp5j	5.45067e-99	0.221224	0.948	0.635	9.31302e-95
Laptm5	3.85185e-98	0.235403	0.978	0.676	6.58127e-94
Cd47	1.34627e-97	0.213751	0.948	0.618	2.30023e-93
Ppia	8.03358e-95	0.277912	0.988	0.864	1.37262e-90
Arpc1b	9.51771e-95	0.244504	0.986	0.726	1.6262e-90
Hspa1a	3.81935e-93	0.231072	0.607	0.353	6.52574e-89
Fos	3.64134e-87	0.298187	0.914	0.663	6.2216e-83
Slfn5	4.1575e-67	0.346779	0.541	0.318	7.10351e-63
Tuba1b	1.18713e-66	0.523249	0.741	0.504	2.02833e-62
Klf2	1.39649e-65	0.227468	0.868	0.659	2.38605e-61

## Sheet: VEC
	p_val	avg_logFC	pct.1	pct.2	p_val_adj
Fabp4	0	4.92659	0.996	0.196	0
Gpihbp1	0	3.34226	0.843	0.008	0
Ly6c1	0	3.25479	0.873	0.025	0
Tm4sf1	0	3.13582	0.707	0.014	0
Igfbp7	0	2.94856	0.806	0.027	0
Cavin2	0	2.87384	0.825	0.009	0
Sparc	0	2.83845	0.867	0.035	0
Aqp1	0	2.80303	0.502	0.005	0
Gng11	0	2.80295	0.856	0.038	0
Hspb1	0	2.75901	0.812	0.027	0
Cav1	0	2.71696	0.849	0.012	0
Cldn5	0	2.71272	0.692	0.005	0
Mgll	0	2.50507	0.745	0.009	0
Egfl7	0	2.50468	0.814	0.009	0
Rbp7	0	2.4941	0.513	0.007	0
Cdh5	0	2.46707	0.793	0.008	0
Id1	0	2.45202	0.686	0.044	0
Id3	0	2.42338	0.801	0.133	0
Cd36	0	2.4037	0.915	0.31	0
Cxcl12	0	2.38086	0.596	0.013	0
Ramp2	0	2.32575	0.734	0.007	0
Flt1	0	2.31786	0.758	0.023	0
Ptprb	0	2.26592	0.657	0.003	0
Sparcl1	0	2.26441	0.714	0.013	0
Kdr	0	2.24616	0.657	0.036	0
Slc9a3r2	0	2.19618	0.659	0.014	0
Timp3	0	2.19392	0.71	0.01	0
Col4a1	0	2.17434	0.688	0.017	0
Crip2	0	2.17142	0.727	0.042	0
Btnl9	0	2.09195	0.55	0.003	0
Esam	0	2.08031	0.697	0.006	0
Sptbn1	0	2.07155	0.782	0.154	0
Adgrf5	0	2.04754	0.666	0.004	0
Tcf15	0	2.04307	0.611	0.004	0
Cd300lg	0	2.03937	0.646	0.059	0
Timp4	0	2.01686	0.515	0.003	0
Epas1	0	1.96174	0.622	0.01	0
Cdkn1c	0	1.96151	0.493	0.026	0
Cavin1	0	1.95712	0.62	0.013	0
Sox18	0	1.93472	0.541	0.002	0
Tinagl1	0	1.9333	0.563	0.005	0
Eng	0	1.91925	0.557	0.041	0
Adamts1	0	1.88272	0.491	0.007	0
Plpp3	0	1.88137	0.561	0.021	0
Rflnb	0	1.86192	0.546	0.032	0
Car4	0	1.81987	0.443	0.002	0
Emcn	0	1.8081	0.511	0.002	0
Lims2	0	1.8077	0.548	0.003	0
Cav2	0	1.77478	0.592	0.071	0
Pecam1	0	1.76697	0.666	0.106	0
Tspan7	0	1.75638	0.546	0.004	0
Col4a2	0	1.73994	0.552	0.01	0
S100a16	0	1.73875	0.563	0.008	0
Jam2	0	1.72019	0.55	0.003	0
Plpp1	0	1.70752	0.454	0.032	0
Cyyr1	0	1.70239	0.546	0.002	0
Kitl	0	1.67431	0.513	0.02	0
C1qtnf9	0	1.65727	0.524	0.001	0
Cyr61	0	1.61745	0.415	0.009	0
Cd200	0	1.60771	0.517	0.047	0
Ecscr	0	1.60627	0.483	0.002	0
Afdn	0	1.6007	0.507	0.041	0
8430408G22Rik	0	1.58813	0.317	0.004	0
Aqp7	0	1.57852	0.454	0.001	0
Iigp1	0	1.56112	0.384	0.025	0
Tcim	0	1.56048	0.419	0.003	0
Fbln5	0	1.53772	0.288	0.004	0
Podxl	0	1.53078	0.459	0.002	0
Adgrl4	0	1.52298	0.45	0.002	0
Myct1	0	1.49636	0.469	0.002	0
Ushbp1	0	1.48525	0.48	0.003	0
Sox17	0	1.48431	0.371	0.002	0
Fermt2	0	1.46863	0.469	0.008	0
S1pr1	0	1.45779	0.559	0.065	0
Itga1	0	1.45338	0.48	0.029	0
Hspg2	0	1.44359	0.41	0.008	0
Ltbp4	0	1.43574	0.426	0.004	0
Ehd2	0	1.43002	0.483	0.008	0
Mmrn2	0	1.4273	0.437	0.001	0
Kank3	0	1.41527	0.441	0.028	0
Apold1	0	1.39566	0.336	0.005	0
Stmn2	0	1.38562	0.234	0.003	0
Unc45b	0	1.30484	0.4	0.002	0
Cavin3	0	1.29445	0.4	0.011	0
Cyp4b1	0	1.28681	0.354	0.005	0
Serpinh1	0	1.27792	0.437	0.015	0
Rasip1	0	1.27598	0.413	0.007	0
Tie1	0	1.27091	0.382	0.002	0
Thrsp	0	1.26879	0.341	0.008	0
Prex2	0	1.26137	0.371	0.004	0
Palmd	0	1.2522	0.38	0.001	0
Efnb1	0	1.2448	0.365	0.01	0
Pdzd2	0	1.23504	0.303	0.003	0
Nfib	0	1.21119	0.38	0.009	0
Cald1	0	1.20583	0.402	0.016	0
Tjp1	0	1.20566	0.36	0.002	0
Tshz2	0	1.18015	0.328	0.005	0
Pls3	0	1.17794	0.352	0.012	0
Cdh13	0	1.17216	0.341	0.001	0
Bcam	0	1.16403	0.325	0.006	0
Tek	0	1.16348	0.378	0.002	0
Sema3g	0	1.1617	0.242	0.002	0
Cd34	0	1.15364	0.321	0.008	0
Adgrg1	0	1.12691	0.323	0.002	0
Slc43a3	0	1.11363	0.369	0.026	0
Dst	0	1.1109	0.373	0.023	0
Sema6a	0	1.09242	0.319	0.002	0
Uaca	0	1.08968	0.321	0.005	0
Arhgap29	0	1.08741	0.325	0.006	0
Ppfibp1	0	1.08341	0.365	0.032	0
2022-09-04	0	1.0826	0.314	0.008	0
Efna1	0	1.07227	0.297	0.001	0
Clec14a	0	1.06995	0.303	0.001	0
Ppic	0	1.06772	0.336	0.009	0
Abcg2	0	1.0671	0.325	0.015	0
Fmo1	0	1.0639	0.275	0.002	0
Arhgef15	0	1.04329	0.314	0.001	0
Clic5	0	1.02425	0.275	0.002	0
Grrp1	0	1.01315	0.273	0.001	0
Tanc1	0	1.01271	0.279	0.012	0
Dlc1	0	1.0037	0.303	0.008	0
Hrct1	0	0.997519	0.29	0.004	0
Dab2ip	0	0.994587	0.317	0.007	0
Jcad	0	0.993179	0.282	0.004	0
Aplnr	0	0.989695	0.227	0.004	0
Fbln2	0	0.988688	0.218	0.004	0
Ablim3	0	0.984237	0.279	0.001	0
Clec1a	0	0.983601	0.288	0.006	0
Ephb4	0	0.950004	0.253	0.001	0
Apbb2	0	0.948495	0.275	0.009	0
Ptprg	0	0.939	0.245	0.001	0
Dock9	0	0.93444	0.251	0.007	0
Myo10	0	0.932733	0.273	0.011	0
Wwtr1	0	0.920344	0.295	0.003	0
Hspa12b	0	0.919225	0.273	0.001	0
Eva1a	0	0.908977	0.234	0.001	0
Akap12	0	0.906593	0.255	0.01	0
Cmtm8	0	0.902831	0.258	0.012	0
Tmem204	0	0.896435	0.245	0.002	0
Efnb2	0	0.893587	0.245	0.003	0
Etl4	0	0.893429	0.227	0.002	0
Fzd4	0	0.88001	0.255	0.006	0
Meox2	0	0.878854	0.264	0.002	0
Mpzl1	0	0.877947	0.249	0.005	0
Rassf9	0	0.85544	0.212	0	0
Sorbs1	0	0.84783	0.242	0.008	0
Pcdh17	0	0.840265	0.234	0.002	0
Bvht	0	0.832253	0.255	0.009	0
Npr1	0	0.826003	0.231	0.005	0
Adamts9	0	0.823195	0.201	0.001	0
Rapgef5	0	0.819196	0.255	0.008	0
Epn2	0	0.806022	0.229	0.005	0
Lamb2	0	0.790821	0.234	0.006	0
F11r	0	0.781531	0.214	0.008	0
Lzts2	0	0.77219	0.247	0.008	0
Rhoj	0	0.771417	0.231	0.009	0
Afap1l1	0	0.769464	0.234	0.004	0
Fgd5	0	0.763503	0.21	0.001	0
Robo4	0	0.760401	0.201	0.001	0
Ldb2	0	0.74702	0.205	0.001	0
Gata2	0	0.744377	0.205	0.003	0
Cd59a	0	0.740407	0.214	0.009	0
Pcdh1	0	0.730105	0.212	0.002	0
Npdc1	0	0.72201	0.216	0.006	0
Tspan12	0	0.719974	0.201	0.003	0
Nid1	0	0.706965	0.225	0.01	0
Yes1	0	0.680996	0.205	0.007	0
Tns1	1.38676e-301	1.34436	0.476	0.059	2.36942e-297
Nedd4	2.07293e-299	1.18024	0.437	0.048	3.54181e-295
Nes	6.79266e-276	0.81354	0.223	0.012	1.16059e-271
Arhgef12	1.18102e-272	0.943236	0.31	0.026	2.01789e-268
Itga6	4.64423e-267	1.30461	0.45	0.058	7.93513e-263
Smco4	2.84423e-257	1.24556	0.402	0.048	4.85965e-253
Plcb4	1.49356e-255	1.15135	0.332	0.033	2.55189e-251
Ly6a	2.3208e-251	2.17989	0.83	0.255	3.96531e-247
Rgcc	8.27656e-251	2.03358	0.755	0.202	1.41413e-246
Heg1	1.1635e-250	1.13574	0.376	0.042	1.98795e-246
Cd81	1.87404e-247	1.81657	0.801	0.227	3.20199e-243
Myo1b	4.17783e-244	0.715452	0.21	0.013	7.13824e-240
Pkp4	4.71004e-232	0.995262	0.306	0.03	8.04757e-228
Cnn3	3.53217e-227	1.08797	0.402	0.052	6.03507e-223
Tcf4	4.52496e-226	1.68351	0.771	0.237	7.73135e-222
Icam2	1.09537e-222	1.37503	0.493	0.085	1.87155e-218
Ccdc85b	1.60839e-219	1.25761	0.4	0.056	2.74809e-215
Tmem88	6.64669e-219	1.23936	0.419	0.062	1.13565e-214
Snrk	2.57358e-217	1.29811	0.493	0.087	4.39721e-213
Sult1a1	6.34608e-211	1.17408	0.354	0.045	1.08429e-206
Cracr2b	3.05617e-208	0.867128	0.269	0.026	5.22177e-204
Mast4	1.28517e-207	0.896817	0.286	0.028	2.19584e-203
Ctla2a	1.41253e-205	1.40138	0.439	0.068	2.41345e-201
Thbd	3.31737e-203	1.05822	0.293	0.031	5.66806e-199
Aplp2	1.48121e-202	1.67413	0.795	0.304	2.5308e-198
Tspan13	1.59734e-202	1.62003	0.773	0.269	2.72921e-198
Ddah2	3.97242e-196	0.832991	0.266	0.027	6.78728e-192
Cd151	3.53952e-191	1.12244	0.391	0.061	6.04763e-187
Ablim1	7.00238e-185	1.08927	0.507	0.095	1.19643e-180
Tsc22d1	2.59967e-181	1.36067	0.498	0.104	4.4418e-177
Nfia	4.28381e-178	0.713496	0.229	0.021	7.31931e-174
Klf9	5.61058e-176	1.10044	0.43	0.077	9.58624e-172
Arap3	1.70191e-172	0.725997	0.214	0.019	2.90788e-168
mt-Nd2	1.97181e-170	1.66348	0.799	0.315	3.36904e-166
Jup	4.32499e-162	1.17481	0.421	0.083	7.38967e-158
mt-Cytb	2.54361e-155	1.60961	0.83	0.379	4.34601e-151
Gna11	3.04576e-155	0.836242	0.282	0.037	5.20398e-151
Luzp1	4.70827e-154	1.18554	0.437	0.093	8.04455e-150
Arhgap31	8.67522e-154	1.18734	0.535	0.135	1.48225e-149
Pdgfb	2.97366e-153	0.931144	0.295	0.041	5.0808e-149
Enpp4	6.87311e-153	0.751984	0.225	0.024	1.17434e-148
Gm42418	8.48774e-153	1.79908	0.895	0.527	1.45022e-148
4931406P16Rik	5.9754e-151	0.997334	0.323	0.051	1.02096e-146
mt-Nd1	1.30149e-137	1.41298	0.878	0.478	2.22373e-133
Tmcc3	1.49162e-137	1.11186	0.448	0.105	2.54858e-133
Ece1	3.46546e-134	1.16431	0.397	0.087	5.92109e-130
Zbtb20	4.36829e-134	1.19601	0.572	0.171	7.46366e-130
Arid5b	3.84536e-130	1.2612	0.517	0.148	6.57018e-126
mt-Nd4	1.34229e-128	1.4085	0.849	0.469	2.29345e-124
mt-Atp6	5.81524e-127	1.29631	0.869	0.529	9.93593e-123
Crim1	6.4104e-127	0.684774	0.225	0.028	1.09528e-122
Ctnnbip1	1.42903e-126	1.18995	0.439	0.113	2.44165e-122
Ccser2	4.85337e-123	0.885066	0.334	0.063	8.29248e-119
Nrp1	4.94903e-123	1.35535	0.574	0.204	8.45591e-119
Rhoc	4.67136e-120	1.11801	0.459	0.124	7.98149e-116
Hes1	6.07504e-120	0.941961	0.312	0.055	1.03798e-115
Syne2	4.31237e-119	0.798937	0.238	0.034	7.36811e-115
Ddit4	4.33656e-119	0.831453	0.286	0.048	7.40944e-115
Tmem140	3.17366e-118	0.989653	0.341	0.07	5.42252e-114
Lpar6	5.73509e-117	1.08954	0.319	0.062	9.79897e-113
Utrn	5.05084e-116	1.08696	0.417	0.103	8.62986e-112
Rasgrp3	5.55415e-115	0.831717	0.277	0.046	9.48982e-111
Gm1673	2.84319e-114	0.73503	0.21	0.028	4.85788e-110
mt-Co2	9.1532e-114	1.28222	0.838	0.479	1.56392e-109
Angptl4	1.26543e-113	1.17866	0.26	0.043	2.16212e-109
Slfn5	9.42126e-111	1.31534	0.703	0.329	1.60972e-106
Selenom	8.01461e-109	1.02052	0.413	0.108	1.36938e-104
Vamp5	8.82497e-109	0.869356	0.301	0.058	1.50783e-104
Mfge8	3.76153e-108	0.729643	0.251	0.041	6.42694e-104
Pim3	3.76426e-106	1.23392	0.463	0.138	6.43162e-102
Lmo1	4.49811e-106	0.921328	0.31	0.064	7.68547e-102
Egr1	1.29664e-104	1.40802	0.679	0.302	2.21544e-100
Cxcl9	5.54298e-104	0.901071	0.223	0.033	9.47074e-100
Wwc2	7.02921e-103	0.776923	0.242	0.04	1.20101e-98
Fam43a	7.10652e-103	0.772405	0.293	0.055	1.21422e-98
Sgk1	2.68245e-99	1.4034	0.526	0.191	4.58323e-95
Fabp5	4.79348e-97	0.618817	0.672	0.244	8.19015e-93
Cd93	1.58641e-94	1.10425	0.528	0.195	2.71055e-90
Laptm4a	1.78357e-94	1.2132	0.734	0.452	3.0474e-90
Rbpms	1.29254e-93	0.867504	0.323	0.074	2.20844e-89
Pparg	6.66084e-92	1.08595	0.397	0.115	1.13807e-87
mt-Nd3	7.68871e-92	1.01547	0.67	0.302	1.31369e-87
S100a1	1.66865e-89	1.07981	0.498	0.188	2.85105e-85
Hdac7	4.73185e-88	0.628848	0.234	0.042	8.08484e-84
Ndrg1	4.75071e-88	0.921512	0.338	0.087	8.11706e-84
Gnas	6.52068e-88	0.902094	0.871	0.719	1.11412e-83
Atp5j	2.71271e-85	0.956858	0.854	0.656	4.63493e-81
Klf7	3.76171e-83	0.94002	0.378	0.109	6.42726e-79
Tgm2	1.96701e-78	0.976643	0.382	0.117	3.36084e-74
Ctnnb1	9.18011e-78	1.12971	0.513	0.217	1.56851e-73
Txnip	1.63572e-77	0.993594	0.666	0.34	2.79479e-73
Ets2	3.53664e-77	0.887671	0.408	0.131	6.0427e-73
Gstm1	3.92114e-77	0.966599	0.448	0.159	6.69966e-73
mt-Co3	1.04723e-76	1.02279	0.821	0.528	1.78929e-72
Gadd45g	1.50017e-76	1.28002	0.491	0.196	2.56319e-72
Eva1b	1.16906e-73	0.809573	0.332	0.094	1.99746e-69
Nck1	2.90606e-72	0.916006	0.338	0.1	4.96529e-68
Tnfaip1	1.91696e-71	0.787003	0.262	0.063	3.27531e-67
Fnbp1l	1.14051e-70	0.806541	0.271	0.067	1.94868e-66
Ppp1r2	5.48811e-70	1.13696	0.568	0.296	9.37698e-66
App	6.12625e-69	1.02	0.614	0.337	1.04673e-64
Rdx	2.06664e-67	1.0887	0.52	0.246	3.53106e-63
Gstt2	9.6642e-65	0.749772	0.223	0.05	1.65122e-60
Cd38	2.06785e-64	0.59475	0.236	0.053	3.53314e-60
Ebf1	4.80623e-64	0.281045	0.522	0.173	8.21192e-60
S100a13	5.60745e-64	1.00854	0.686	0.465	9.58089e-60
Elk3	1.54818e-63	0.808404	0.345	0.112	2.64522e-59
Mprip	2.13436e-62	0.817932	0.295	0.086	3.64676e-58
Myl12a	5.5897e-62	0.829911	0.814	0.664	9.55056e-58
Fkbp1a	8.17378e-62	0.985145	0.648	0.429	1.39657e-57
Mxd4	1.13211e-61	0.918429	0.421	0.164	1.93433e-57
mt-Co1	1.15114e-59	0.823806	0.832	0.615	1.96683e-55
Notch1	4.87848e-59	0.708184	0.273	0.076	8.33537e-55
Cpd	1.54157e-57	0.598122	0.214	0.05	2.63393e-53
Tmem245	2.90894e-57	0.70728	0.221	0.053	4.97022e-53
Gbp7	1.21234e-56	0.738999	0.279	0.081	2.07141e-52
Socs2	4.84119e-55	0.516254	0.205	0.046	8.27166e-51
Lpl	8.46234e-55	0.86401	0.579	0.278	1.44588e-50
Rtl8a	2.2199e-54	0.787113	0.242	0.067	3.79293e-50
Nbeal1	2.79334e-54	0.733649	0.275	0.082	4.77271e-50
Fez2	9.85052e-54	0.851284	0.325	0.115	1.68306e-49
Anxa3	2.21545e-52	0.832891	0.389	0.157	3.78531e-48
Wasl	4.42655e-52	0.66866	0.249	0.071	7.56321e-48
Selenow	8.10161e-51	0.713173	0.801	0.667	1.38424e-46
Kctd10	7.55225e-50	0.843573	0.314	0.111	1.29038e-45
Acvrl1	4.63392e-49	0.937942	0.378	0.162	7.91752e-45
mt-Nd4l	1.08397e-48	0.838938	0.463	0.22	1.85207e-44
Rras	2.75117e-47	0.590554	0.24	0.071	4.70065e-43
Trim24	5.40013e-46	0.611685	0.216	0.059	9.22666e-42
Itpkb	5.87907e-46	0.77056	0.443	0.203	1.0045e-41
Sptan1	3.49727e-45	0.683618	0.312	0.115	5.97543e-41
Tpst1	4.6594e-45	0.729672	0.269	0.09	7.96105e-41
Jun	9.9216e-45	0.983413	0.716	0.548	1.69521e-40
Gm20594	1.67556e-44	0.657393	0.249	0.077	2.86287e-40
Rsad2	3.19476e-44	0.809277	0.397	0.174	5.45857e-40
Pros1	4.78261e-44	0.640622	0.221	0.064	8.17156e-40
Slc6a6	5.08884e-44	1.22898	0.537	0.355	8.6948e-40
mt-Nd5	1.24396e-43	0.795311	0.657	0.433	2.12542e-39
Scarb1	2.69471e-43	0.876394	0.312	0.123	4.60419e-39
Itm2b	4.95106e-43	0.438013	0.945	0.777	8.45938e-39
Tspan4	8.1265e-43	0.736924	0.264	0.091	1.38849e-38
Cltb	4.9259e-42	0.825121	0.386	0.183	8.41639e-38
Gimap6	5.01612e-42	0.420558	0.52	0.225	8.57055e-38
Inpp1	6.27658e-42	0.507999	0.207	0.058	1.07242e-37
Klf4	8.81608e-42	0.98367	0.659	0.476	1.50632e-37
Ndufa8	3.39949e-41	0.898847	0.585	0.403	5.80837e-37
Itgb1	4.79361e-41	0.802459	0.598	0.407	8.19036e-37
Plk2	7.10887e-41	0.755646	0.459	0.228	1.21462e-36
Bst2	1.18604e-40	0.787756	0.721	0.532	2.02646e-36
Ctnna1	4.41372e-40	0.927365	0.402	0.206	7.54128e-36
Adam15	5.5834e-40	0.795123	0.325	0.136	9.5398e-36
Dusp3	7.18163e-40	0.892499	0.426	0.223	1.22705e-35
Ybx1	1.46489e-39	0.619079	0.817	0.708	2.5029e-35
Sec62	1.82323e-39	0.756653	0.614	0.42	3.11517e-35
Gimap4	6.73631e-39	0.41871	0.341	0.124	1.15097e-34
H1f0	7.19286e-39	0.827753	0.36	0.163	1.22897e-34
Mapk3	1.06532e-38	0.880707	0.415	0.221	1.8202e-34
Malat1	6.45392e-38	0.43493	0.954	0.914	1.10272e-33
Ifitm3	9.57189e-38	0.40532	0.889	0.565	1.63545e-33
Ifi27	1.42056e-37	0.758024	0.441	0.23	2.42717e-33
Trim47	4.38717e-37	0.618696	0.21	0.067	7.49591e-33
Sh3bp5	4.54862e-37	0.633178	0.29	0.108	7.77178e-33
Tmod3	1.45649e-36	0.787632	0.452	0.247	2.48856e-32
H2-Q4	1.6032e-36	0.781364	0.356	0.161	2.73923e-32
Elk4	2.10404e-36	0.594155	0.271	0.099	3.59497e-32
Ctsl	3.19137e-36	0.391302	0.544	0.292	5.45278e-32
Chchd10	1.06579e-35	0.768898	0.273	0.101	1.82101e-31
Smim10l1	1.11542e-35	0.716875	0.308	0.132	1.9058e-31
Btg2	2.65934e-35	0.810035	0.753	0.655	4.54376e-31
Gbp2	1.31789e-34	0.598377	0.251	0.09	2.25174e-30
Ifitm2	4.87752e-32	0.53186	0.749	0.548	8.33373e-28
Ly6e	8.38433e-32	0.496731	0.889	0.754	1.43255e-27
Clic4	3.7655e-31	0.79975	0.459	0.283	6.43373e-27
Slc50a1	4.44692e-31	0.681296	0.347	0.168	7.598e-27
Cyb5a	7.97987e-31	0.764666	0.576	0.407	1.36344e-26
Chchd2	8.43093e-31	0.487106	0.867	0.778	1.44051e-26
Lrrc8c	1.02581e-30	0.657654	0.264	0.109	1.7527e-26
Ercc1	1.30357e-30	0.56653	0.214	0.077	2.22728e-26
Cebpd	7.44289e-30	0.742662	0.312	0.143	1.27169e-25
Dynll1	9.83612e-30	0.552061	0.801	0.691	1.6806e-25
Actn4	2.0516e-29	0.794375	0.402	0.233	3.50536e-25
Fryl	8.1342e-29	0.624519	0.253	0.103	1.38981e-24
Klf2	2.22572e-28	0.596948	0.806	0.673	3.80286e-24
Rhob	6.73946e-28	0.813556	0.424	0.248	1.1515e-23
Fcho2	8.85195e-28	0.672761	0.31	0.15	1.51244e-23
Cyb5r3	1.20454e-27	0.7881	0.341	0.181	2.05807e-23
Sypl	2.52347e-27	0.700089	0.38	0.211	4.3116e-23
Anp32a	3.55492e-27	0.708611	0.598	0.471	6.07393e-23
Myl6	3.62135e-27	0.394785	0.9	0.812	6.18744e-23
Serinc3	3.95106e-27	0.48918	0.745	0.622	6.75077e-23
Gbp3	1.7015e-26	0.523844	0.214	0.082	2.90719e-22
Elovl5	2.51295e-26	0.559503	0.258	0.113	4.29363e-22
Nfe2l1	2.53683e-26	0.726352	0.242	0.103	4.33442e-22
Tubb4b	2.91226e-26	0.696643	0.454	0.284	4.97589e-22
Uqcrb	6.84562e-26	0.604729	0.723	0.615	1.16964e-21
Il6st	1.02739e-25	0.783874	0.214	0.085	1.75539e-21
Nrp2	1.54657e-25	0.666089	0.229	0.096	2.64247e-21
Pkn2	2.12412e-25	0.663347	0.362	0.202	3.62928e-21
Map4	2.80569e-25	0.612922	0.269	0.124	4.7938e-21
Xiap	9.13522e-25	0.687553	0.328	0.171	1.56084e-20
Fli1	1.50267e-24	0.57268	0.365	0.198	2.56746e-20
Tuba1a	1.7512e-24	0.723136	0.507	0.352	2.99211e-20
Pitpnc1	2.91623e-24	0.518252	0.236	0.099	4.98268e-20
Wasf2	3.08924e-24	0.627016	0.526	0.389	5.27828e-20
Ggta1	3.56545e-24	0.502318	0.212	0.086	6.09193e-20
Oaz2	4.02819e-24	0.695363	0.295	0.15	6.88256e-20
Hist1h2bc	5.82451e-24	0.703603	0.321	0.165	9.95175e-20
Map1lc3a	6.41501e-24	0.520877	0.279	0.134	1.09607e-19
Ets1	9.74554e-24	0.259303	0.454	0.225	1.66512e-19
Arhgap5	1.16243e-23	0.549798	0.258	0.12	1.98612e-19
Pnpla2	1.37379e-23	0.605234	0.269	0.128	2.34726e-19
Rassf3	1.98636e-23	0.631489	0.273	0.13	3.3939e-19
Cds2	2.52453e-23	0.430187	0.203	0.08	4.31342e-19
Rgs3	4.74259e-23	0.591314	0.225	0.097	8.10319e-19
Ndufc2	1.38614e-22	0.602457	0.607	0.504	2.36836e-18
Nudt4	1.77522e-22	0.646909	0.251	0.119	3.03315e-18
Tmem184b	2.17381e-22	0.522097	0.212	0.09	3.71417e-18
Smagp	2.61982e-22	0.421475	0.225	0.095	4.47622e-18
Plxnd1	2.84916e-22	0.543296	0.207	0.088	4.86807e-18
Serpinb6a	5.03976e-22	0.465952	0.336	0.175	8.61093e-18
Nbdy	8.5827e-22	0.494147	0.24	0.111	1.46644e-17
Nr3c1	8.60166e-22	0.617722	0.384	0.234	1.46968e-17
Mbnl2	1.07538e-21	0.636006	0.393	0.245	1.8374e-17
Gas6	1.24576e-21	0.477433	0.229	0.099	2.12851e-17
Ktn1	2.8759e-21	0.569744	0.262	0.126	4.91375e-17
Mylip	4.67858e-21	0.555908	0.275	0.136	7.99381e-17
Arhgap18	8.86493e-21	0.714763	0.297	0.164	1.51466e-16
Ehd1	1.12592e-20	0.644077	0.356	0.212	1.92375e-16
Zfp36l1	1.99375e-20	0.516903	0.559	0.401	3.40652e-16
Pcmtd1	2.88372e-20	0.571782	0.271	0.136	4.92712e-16
Tsen34	3.62568e-20	0.569924	0.255	0.127	6.19485e-16
Adipor2	5.42425e-20	0.509583	0.262	0.131	9.26788e-16
Tcn2	1.4441e-19	0.575208	0.251	0.125	2.46738e-15
Calm1	2.03909e-19	0.27474	0.921	0.83	3.48398e-15
Glul	2.80453e-19	0.812814	0.389	0.26	4.79183e-15
Cdc42ep3	3.21301e-19	0.608511	0.273	0.143	5.48974e-15
Rabac1	3.84128e-19	0.517018	0.62	0.531	6.56321e-15
Tmem59	4.27736e-19	0.627071	0.544	0.465	7.30829e-15
Mgst1	5.31728e-19	0.54859	0.297	0.157	9.0851e-15
Pgrmc1	7.33507e-19	0.615015	0.303	0.174	1.25327e-14
Selenof	1.26208e-18	0.551305	0.622	0.539	2.1564e-14
Rock2	2.26951e-18	0.580509	0.303	0.172	3.87768e-14
Lima1	2.64234e-18	0.592205	0.221	0.108	4.51469e-14
Cox7a2	4.10658e-18	0.529557	0.705	0.632	7.0165e-14
Smc1a	4.41619e-18	0.610421	0.395	0.265	7.54551e-14
Clec2d	7.68654e-18	0.535436	0.29	0.159	1.31332e-13
Sod1	8.53958e-18	0.616114	0.45	0.333	1.45907e-13
Bsg	1.12236e-17	0.663081	0.557	0.467	1.91766e-13
Cox6c	1.70651e-17	0.524804	0.766	0.701	2.91574e-13
Ubc	2.69857e-17	0.469571	0.795	0.777	4.61078e-13
Cd2ap	3.26552e-17	0.6511	0.325	0.201	5.57946e-13
Foxn3	4.97914e-17	0.430646	0.384	0.24	8.50735e-13
1810037I17Rik	5.14678e-17	0.579447	0.572	0.492	8.79379e-13
Ctdsp2	5.68964e-17	0.449745	0.242	0.124	9.72131e-13
Ndufa4	6.64473e-17	0.424827	0.731	0.645	1.13532e-12
Diaph2	7.86419e-17	0.48257	0.218	0.108	1.34368e-12
Ier2	2.14229e-16	0.558726	0.675	0.612	3.66031e-12
Ralbp1	2.30679e-16	0.602106	0.437	0.324	3.94138e-12
Ccnd2	3.21808e-16	0.470891	0.384	0.239	5.49841e-12
Tpm1	8.87991e-16	0.5871	0.255	0.143	1.51722e-11
Smad7	8.88924e-16	0.296202	0.225	0.108	1.51882e-11
Fos	9.90763e-16	0.71118	0.714	0.683	1.69282e-11
Irf1	1.06495e-15	0.631969	0.36	0.233	1.81957e-11
Hspa1b	1.18443e-15	0.737876	0.328	0.199	2.02371e-11
Socs3	1.1866e-15	0.647606	0.347	0.22	2.02742e-11
Kif1b	1.33763e-15	0.589972	0.214	0.109	2.28548e-11
Ptp4a3	2.17807e-15	0.465394	0.319	0.188	3.72145e-11
Dram2	3.20572e-15	0.560426	0.269	0.158	5.47729e-11
Dnaja1	5.15005e-15	0.438459	0.67	0.608	8.79938e-11
Znrf1	5.69325e-15	0.449631	0.201	0.099	9.72748e-11
Tax1bp3	5.72827e-15	0.570729	0.264	0.156	9.78733e-11
Tob1	6.09791e-15	0.508803	0.321	0.195	1.04189e-10
1700020I14Rik	1.10578e-14	0.516483	0.321	0.206	1.88933e-10
Ccdc47	4.99841e-14	0.549684	0.249	0.142	8.54029e-10
Isg15	7.1798e-14	0.358323	0.48	0.34	1.22674e-09
Tpm4	9.44438e-14	0.54143	0.552	0.471	1.61367e-09
Stx12	9.59683e-14	0.554007	0.247	0.146	1.63971e-09
B230219D22Rik	1.22005e-13	0.48696	0.273	0.162	2.08457e-09
Ptma	1.70051e-13	0.211551	0.91	0.861	2.90548e-09
Fcgrt	5.23026e-13	0.544305	0.352	0.241	8.93641e-09
Ppp2r5a	5.58729e-13	0.533907	0.345	0.235	9.54644e-09
Uqcr11	7.0809e-13	0.540803	0.579	0.51	1.20984e-08
Gpx4	7.51651e-13	0.445361	0.662	0.589	1.28427e-08
Rab11a	9.38801e-13	0.566512	0.465	0.388	1.60404e-08
Cox6a1	1.05446e-12	0.421806	0.747	0.694	1.80165e-08
Pnkd	1.10181e-12	0.514052	0.288	0.185	1.88256e-08
Ifit1	1.27114e-12	0.4972	0.205	0.108	2.17187e-08
Ginm1	1.41394e-12	0.420363	0.231	0.133	2.41586e-08
H2-K1	1.77975e-12	0.268012	0.865	0.814	3.04088e-08
Pea15a	2.00879e-12	0.492475	0.286	0.182	3.43221e-08
Xdh	2.21625e-12	0.575544	0.205	0.115	3.78669e-08
Ccdc88c	3.02226e-12	0.379301	0.203	0.103	5.16383e-08
Atp5j2	3.03212e-12	0.45301	0.699	0.646	5.18068e-08
Prkch	6.00861e-12	0.402606	0.205	0.112	1.02663e-07
Klf13	1.03258e-11	0.458994	0.43	0.338	1.76426e-07
Kcnq1ot1	1.12291e-11	0.553926	0.247	0.146	1.9186e-07
Pla2g16	3.82645e-11	0.412921	0.299	0.194	6.53788e-07
Sh3glb1	3.88167e-11	0.413801	0.618	0.569	6.63222e-07
Pdlim1	4.1697e-11	0.423576	0.223	0.13	7.12436e-07
Dusp1	4.4248e-11	0.363754	0.675	0.594	7.56022e-07
Ywhaq	4.69321e-11	0.501589	0.491	0.433	8.01882e-07
Macf1	5.00549e-11	0.444731	0.367	0.265	8.55238e-07
Csrp1	5.66773e-11	0.454261	0.29	0.194	9.68388e-07
Sbds	8.09159e-11	0.538053	0.323	0.233	1.38253e-06
Strn3	9.24701e-11	0.352469	0.221	0.128	1.57994e-06
Peak1	9.41548e-11	0.307715	0.203	0.114	1.60873e-06
Cdkn1a	1.00324e-10	0.447479	0.55	0.453	1.71414e-06
Slc25a4	1.02557e-10	0.461706	0.461	0.379	1.75229e-06
Ahnak	1.24466e-10	0.38073	0.6	0.508	2.12662e-06
Tprgl	1.34467e-10	0.452653	0.393	0.307	2.2975e-06
Son	1.69401e-10	0.432173	0.629	0.604	2.89438e-06
Crk	1.88759e-10	0.455448	0.24	0.151	3.22513e-06
Nav1	2.19516e-10	0.438149	0.227	0.14	3.75065e-06
Chmp5	2.2337e-10	0.57482	0.38	0.305	3.81649e-06
Myadm	3.07059e-10	0.558615	0.356	0.269	5.2464e-06
Tsnax	3.35241e-10	0.462318	0.227	0.142	5.72793e-06
Midn	7.02315e-10	0.472594	0.245	0.157	1.19998e-05
Dynlt3	1.13337e-09	0.383248	0.223	0.138	1.93647e-05
Ndufa5	1.47521e-09	0.600921	0.382	0.311	2.52055e-05
Fus	1.70831e-09	0.383427	0.607	0.572	2.91881e-05
Tnfrsf1a	1.70989e-09	0.458165	0.358	0.281	2.92152e-05
Ankrd12	4.66665e-09	0.477348	0.334	0.25	7.97343e-05
Hmgb1	5.26624e-09	0.479526	0.522	0.465	8.9979e-05
Bnip2	5.29575e-09	0.59944	0.362	0.295	9.04832e-05
Selenok	5.29731e-09	0.316719	0.681	0.659	9.05098e-05
Qk	5.74187e-09	0.470264	0.312	0.233	9.81056e-05
Adam10	9.03326e-09	0.405645	0.214	0.136	0.000154342
Aida	1.76165e-08	0.372943	0.236	0.155	0.000300996
Atxn7l3b	2.1523e-08	0.424757	0.336	0.262	0.000367741
Hspa1a	2.17693e-08	0.483541	0.463	0.372	0.00037195
Dstn	3.02812e-08	0.511316	0.349	0.278	0.000517385
Rab6a	3.74417e-08	0.454931	0.284	0.209	0.000639729
Mef2a	3.7625e-08	0.460155	0.334	0.259	0.000642861
Gnai2	3.97344e-08	0.282562	0.714	0.679	0.000678902
Hook3	4.04871e-08	0.367444	0.223	0.146	0.000691763
Ptms	4.8358e-08	0.461015	0.459	0.394	0.000826245
Taok1	5.29417e-08	0.342627	0.21	0.132	0.000904562
AY036118	5.6024e-08	0.471816	0.317	0.24	0.000957226
Lman1	6.76242e-08	0.460755	0.24	0.169	0.00115543
Zmynd11	7.41031e-08	0.363339	0.207	0.132	0.00126613
Atraid	7.47625e-08	0.476063	0.323	0.253	0.00127739
Tap2	8.94221e-08	0.43336	0.341	0.266	0.00152787
Uqcr10	8.94849e-08	0.487549	0.566	0.529	0.00152894
Cyth1	1.09611e-07	0.412943	0.214	0.139	0.00187282
Fbxw2	1.10806e-07	0.40195	0.293	0.217	0.00189323
Mtch1	1.47866e-07	0.440485	0.277	0.208	0.00252644
Klhl24	1.50842e-07	0.290472	0.271	0.184	0.00257729
Setd5	1.68553e-07	0.412447	0.203	0.132	0.0028799
Ppp1r10	5.51358e-07	0.405321	0.293	0.219	0.0094205
Pttg1ip	6.22554e-07	0.412415	0.225	0.158	0.010637
Cr1l	6.725e-07	0.498817	0.288	0.222	0.0114903
Cebpg	7.26731e-07	0.391357	0.258	0.188	0.0124169
Dync1h1	7.29395e-07	0.363236	0.227	0.158	0.0124624
Nenf	7.35151e-07	0.45239	0.303	0.237	0.0125608
Ndufs5	7.45011e-07	0.413139	0.463	0.43	0.0127293
Hras	7.55615e-07	0.431709	0.205	0.14	0.0129104
Hadhb	7.62338e-07	0.470712	0.253	0.187	0.0130253
Dbi	1.05729e-06	0.350508	0.59	0.547	0.0180649
2022-09-07	1.37734e-06	0.389855	0.507	0.479	0.0235333
Eif4a2	1.72051e-06	0.341748	0.502	0.453	0.0293966
Xaf1	1.81881e-06	0.435303	0.288	0.226	0.0310761
Vamp3	3.31305e-06	0.40153	0.247	0.185	0.0566068
Tmem30a	4.75699e-06	0.45652	0.306	0.246	0.081278
Hexim1	4.79588e-06	0.332568	0.299	0.225	0.0819423
Rsrp1	5.10847e-06	0.344529	0.583	0.569	0.0872833
Prdx4	5.56173e-06	0.452575	0.284	0.229	0.0950278
Gabarapl2	6.85315e-06	0.371757	0.498	0.486	0.117093
Baz2b	9.0007e-06	0.365372	0.275	0.213	0.153786
Tgfbr2	1.26211e-05	0.307681	0.238	0.172	0.215644
Gnb1	1.34602e-05	0.403174	0.465	0.445	0.229982
Reep3	1.44452e-05	0.464234	0.303	0.255	0.24681
Taf7	1.90791e-05	0.350771	0.227	0.168	0.325985
Sertad1	2.25441e-05	0.460534	0.415	0.381	0.385188
Cbfa2t3	2.90119e-05	0.371803	0.269	0.209	0.495698
Rbms1	3.31405e-05	0.380155	0.443	0.414	0.566239
Psmd7	4.16377e-05	0.412556	0.367	0.332	0.711421
Nisch	4.53084e-05	0.36137	0.288	0.233	0.774139
Eif4g2	4.73716e-05	0.30985	0.533	0.521	0.809391
Cox6b1	4.95412e-05	0.28329	0.714	0.688	0.846461
Ddx3x	6.13638e-05	0.368626	0.421	0.388	1
Arhgef2	6.58725e-05	0.356761	0.201	0.148	1
Dhrs7	6.81795e-05	0.370176	0.231	0.181	1
Rlim	7.3407e-05	0.324429	0.205	0.152	1
Atox1	7.9892e-05	0.292095	0.705	0.647	1
Zcchc6	0.000101407	0.35222	0.352	0.307	1
Sppl2a	0.000101558	0.361268	0.277	0.23	1
Adipor1	0.000104415	0.303939	0.408	0.375	1
Purb	0.000107351	0.258109	0.273	0.215	1
Hnrnph1	0.000115363	0.404086	0.345	0.298	1
Ech1	0.000115496	0.466424	0.343	0.311	1
Nus1	0.000121563	0.333681	0.207	0.157	1
Serinc1	0.000124654	0.425583	0.306	0.267	1
Cbx1	0.000128204	0.398218	0.277	0.228	1
Usp34	0.000152311	0.301492	0.242	0.19	1
Atrx	0.000154078	0.401337	0.373	0.338	1
Pura	0.000161134	0.247161	0.216	0.163	1
Chmp2a	0.000212486	0.373007	0.498	0.487	1
H2-Q6	0.000233936	0.309716	0.225	0.17	1
Nxf1	0.000240777	0.319484	0.249	0.2	1
Ndufa7	0.000245225	0.358863	0.557	0.559	1
Tmem109	0.000245803	0.383451	0.21	0.167	1
Elob	0.000264956	0.25607	0.668	0.658	1
Rab18	0.000265776	0.43233	0.271	0.234	1
Romo1	0.000277276	0.458471	0.371	0.355	1
Kif5b	0.000288407	0.347853	0.441	0.434	1
Tmbim6	0.000313629	0.248447	0.635	0.642	1
Hmg20b	0.000323022	0.418485	0.214	0.172	1
Arglu1	0.000323767	0.41483	0.321	0.283	1
Pbrm1	0.000336478	0.273323	0.314	0.27	1
Akap9	0.000347902	0.388428	0.231	0.185	1
Klf3	0.00038662	0.266166	0.321	0.271	1
Rad21	0.000398984	0.357411	0.227	0.177	1
Sbno2	0.00049966	0.330824	0.262	0.217	1
Ndufb4	0.000603887	0.379598	0.417	0.413	1
Cenpb	0.000610816	0.336268	0.201	0.159	1
Rasgrp2	0.000685373	0.205078	0.223	0.167	1
Parp14	0.000747025	0.323656	0.229	0.183	1
Atp5g3	0.000767775	0.340862	0.437	0.43	1
Tceal9	0.000789418	0.3798	0.31	0.273	1
Mat2a	0.000791686	0.374345	0.415	0.403	1
Cast	0.000941475	0.3337	0.269	0.23	1
Mrpl27	0.000951881	0.367386	0.236	0.199	1
Morf4l1	0.000998206	0.213581	0.635	0.67	1
Plec	0.00101829	0.307032	0.205	0.161	1
Tgoln1	0.00121389	0.311784	0.293	0.252	1
Higd2a	0.00124695	0.348264	0.378	0.361	1
Cetn3	0.00143549	0.417379	0.332	0.314	1
Imp3	0.00163716	0.315325	0.282	0.244	1
Capns1	0.00166063	0.30227	0.509	0.507	1
Cox5a	0.00176323	0.216242	0.655	0.623	1
Azi2	0.00177626	0.341429	0.205	0.165	1
Etfb	0.00183473	0.39564	0.384	0.377	1
Smim11	0.00186472	0.379574	0.279	0.25	1
Psmb10	0.00187551	0.293333	0.443	0.44	1
Rock1	0.00189059	0.324852	0.36	0.338	1
Ppp1cb	0.00220274	0.339962	0.332	0.302	1
Acadm	0.00225554	0.381116	0.205	0.169	1
Arpc1a	0.00236959	0.340738	0.288	0.265	1
Filip1l	0.00238793	0.22258	0.247	0.204	1
Dhrs3	0.00249053	0.318851	0.275	0.24	1
Tubb2a	0.00250395	0.370998	0.321	0.296	1
Mdfic	0.00259708	0.437466	0.203	0.169	1
Hcfc1r1	0.00270634	0.316087	0.312	0.291	1
Myl12b	0.00277561	0.29395	0.493	0.502	1
Arpp19	0.00292689	0.346453	0.489	0.495	1
Spag9	0.00296882	0.31021	0.362	0.339	1
Aes	0.00328276	0.270839	0.36	0.345	1
Top1	0.00333732	0.311836	0.413	0.401	1
Ypel3	0.00356854	0.200259	0.406	0.373	1
Spop	0.00402473	0.37395	0.354	0.341	1
Pdcl3	0.00405089	0.365562	0.264	0.239	1
Prpf4b	0.00407254	0.225606	0.238	0.2	1
Camk1	0.00429192	0.270029	0.234	0.198	1
Bnip3l	0.00450921	0.234167	0.417	0.409	1
Osbpl9	0.00461711	0.258379	0.229	0.194	1
Ddx17	0.00475427	0.308	0.247	0.213	1
Srpr	0.00508735	0.341392	0.223	0.191	1
Tmem50a	0.00508919	0.250642	0.524	0.534	1
Golgb1	0.00510717	0.317716	0.203	0.171	1
Ddt	0.00532456	0.373178	0.203	0.173	1
2022-09-11	0.00537242	0.214042	0.21	0.172	1
Arl6ip1	0.0054772	0.267986	0.544	0.556	1
Cdipt	0.00669813	0.296388	0.201	0.17	1
Fkbp3	0.0067342	0.322102	0.338	0.322	1
Abhd17a	0.00682315	0.331442	0.242	0.214	1
Rcn2	0.00685424	0.330872	0.207	0.177	1
Capn2	0.00736964	0.37062	0.264	0.244	1
Gsk3b	0.00778204	0.265878	0.253	0.224	1
Hsbp1	0.00807931	0.357987	0.404	0.403	1
Cox7c	0.00906874	0.243748	0.712	0.724	1
Mat2b	0.00987157	0.282409	0.271	0.245	1
2022-03-02	0.0102177	0.279889	0.319	0.305	1
Rtn3	0.0107249	0.351966	0.308	0.299	1
Pum2	0.0122244	0.226894	0.266	0.235	1
Ddx50	0.0125915	0.257501	0.295	0.271	1
Cnpy2	0.0125933	0.344363	0.269	0.254	1
Lmbrd1	0.0138715	0.216716	0.207	0.18	1
Map7d1	0.0140368	0.361646	0.229	0.21	1
Ndufc1	0.0142357	0.429038	0.389	0.402	1
Mier1	0.014311	0.281296	0.275	0.251	1
Csnk1a1	0.0154042	0.298639	0.419	0.429	1
Ndufa6	0.0161129	0.230535	0.579	0.601	1
Gemin7	0.0164876	0.27509	0.229	0.207	1
Ppp3ca	0.0173972	0.248348	0.336	0.324	1
Ndufs6	0.0175243	0.336058	0.402	0.415	1
Prkar1a	0.0193455	0.309191	0.393	0.395	1
Tacc1	0.0226888	0.360523	0.271	0.255	1
Ddrgk1	0.0228431	0.296145	0.286	0.274	1
Vps36	0.0229695	0.301703	0.247	0.228	1
Tnrc6b	0.023085	0.202144	0.225	0.192	1
Anxa7	0.0233637	0.367696	0.301	0.296	1
Ash1l	0.0239527	0.2393	0.236	0.209	1
Ndufb9	0.026743	0.302803	0.469	0.502	1
Picalm	0.0271871	0.316561	0.323	0.318	1
Rnf7	0.0295928	0.36797	0.362	0.374	1
9930111J21Rik2	0.030219	0.305109	0.225	0.203	1
Ywhab	0.0308612	0.268768	0.419	0.435	1
Mtss1	0.0309131	0.332426	0.249	0.23	1
Tm9sf2	0.0325163	0.255494	0.218	0.197	1
Acaa2	0.0336886	0.327779	0.21	0.19	1
Mllt10	0.0338385	0.25872	0.201	0.177	1
2022-03-02	0.0338521	0.252539	0.262	0.246	1
Ndufab1	0.0382012	0.287112	0.386	0.392	1
Uqcrq	0.0386803	0.289077	0.526	0.553	1
Lbr	0.0389651	0.224089	0.205	0.179	1
Tbrg1	0.0417627	0.289009	0.258	0.245	1
Cfdp1	0.042396	0.291665	0.273	0.268	1
Ncor1	0.042953	0.234938	0.386	0.391	1
Ifi35	0.045408	0.327053	0.33	0.328	1
Irgm1	0.0458862	0.347927	0.205	0.187	1
Lrpap1	0.0504029	0.276892	0.234	0.219	1
Zc3h13	0.050821	0.226743	0.212	0.191	1
Srp14	0.0532759	0.211477	0.513	0.547	1
Med21	0.0547713	0.22091	0.207	0.188	1
Polr2i	0.055974	0.321383	0.223	0.208	1
Rab11b	0.0592295	0.321835	0.336	0.341	1
H2-T22	0.0619391	0.208788	0.358	0.363	1
H2afv	0.064516	0.213736	0.358	0.347	1
Leprot	0.0677522	0.31529	0.238	0.228	1
Rgl1	0.069898	0.214844	0.201	0.179	1
Ndufb11	0.0729503	0.257652	0.485	0.523	1
Rbx1	0.0737047	0.213199	0.576	0.605	1
Pin4	0.0773665	0.209603	0.21	0.275	1
Fosb	0.0776838	0.335429	0.467	0.51	1
Tmed5	0.0806272	0.250907	0.365	0.374	1
Polr2m	0.0914705	0.221541	0.212	0.198	1
Cnot4	0.0915404	0.260476	0.221	0.211	1
Usmg5	0.096658	0.242378	0.5	0.523	1
Cbx3	0.0970581	0.27507	0.247	0.236	1
Polr2c	0.10032	0.261945	0.264	0.26	1
Psmc1	0.110049	0.364712	0.221	0.215	1
Nap1l4	0.111113	0.273912	0.223	0.213	1
Ndufb7	0.118394	0.229061	0.485	0.516	1
Pop5	0.122626	0.219863	0.216	0.204	1
Guk1	0.124305	0.227109	0.203	0.193	1
Cd9	0.128971	0.205925	0.358	0.361	1
Mrfap1	0.130171	0.229197	0.463	0.503	1
Kras	0.132371	0.20336	0.31	0.309	1
Ccnl2	0.132483	0.213631	0.238	0.228	1
Atp5o.1	0.138716	0.256706	0.445	0.485	1
Smc3	0.143623	0.26592	0.247	0.24	1
Rab2a	0.150763	0.209051	0.424	0.459	1
Saraf	0.160183	0.214867	0.367	0.382	1
Svbp	0.164557	0.251565	0.225	0.22	1
Uqcc2	0.178742	0.21954	0.273	0.344	1
Polr2k	0.197005	0.201523	0.26	0.326	1
Ndufb6	0.198619	0.294136	0.378	0.406	1
Sptlc2	0.20987	0.266618	0.201	0.196	1
Dnttip2	0.220933	0.210392	0.216	0.212	1
Emc4	0.222433	0.289366	0.238	0.243	1
Lgals9	0.226664	0.292519	0.258	0.262	1
Dynlrb1	0.228621	0.207317	0.469	0.506	1
Lasp1	0.236767	0.319064	0.221	0.22	1
Dctn2	0.24652	0.279229	0.245	0.252	1
Atf4	0.256432	0.241527	0.461	0.499	1
Bod1l	0.259064	0.244826	0.238	0.236	1
Tomm7	0.269166	0.278732	0.513	0.576	1
Nras	0.271415	0.215583	0.221	0.222	1
Paip2	0.273291	0.224352	0.369	0.391	1
Tm2d1	0.273637	0.217115	0.177	0.221	1
Krtcap2	0.276159	0.232194	0.445	0.492	1
Rab14	0.281506	0.225127	0.417	0.451	1
Eid1	0.282843	0.206459	0.205	0.202	1
Tapbp	0.283515	0.258648	0.402	0.437	1
Comt	0.288872	0.200012	0.415	0.445	1
Rbm8a	0.294301	0.239834	0.386	0.419	1
Magoh	0.296511	0.208987	0.295	0.305	1
Rsu1	0.302396	0.227313	0.29	0.308	1
Ndufb2	0.303104	0.338345	0.288	0.313	1
Emc7	0.307907	0.266945	0.317	0.341	1
Cox17	0.311869	0.269362	0.295	0.307	1
Pttg1	0.312531	0.260984	0.258	0.265	1
Ndufb10	0.318884	0.300781	0.413	0.472	1
Eif4g1	0.321212	0.232469	0.223	0.225	1
Tra2a	0.321822	0.218439	0.301	0.31	1
C1d	0.334263	0.203775	0.218	0.268	1
Chmp3	0.336058	0.277888	0.231	0.237	1
Zfp36	0.347962	0.266934	0.504	0.55	1
Etfa	0.352289	0.214437	0.223	0.272	1
Ube2r2	0.363854	0.211095	0.242	0.249	1
Ndufa11	0.369725	0.21407	0.323	0.4	1
Mlf2	0.371043	0.270236	0.295	0.315	1
Tmco1	0.38372	0.282287	0.26	0.277	1
Dnajb1	0.385412	0.279421	0.293	0.305	1
Sugt1	0.399156	0.234248	0.303	0.321	1
Akt1	0.430036	0.268554	0.203	0.211	1
Cpne3	0.438687	0.253165	0.201	0.205	1
Mrpl17	0.462663	0.211855	0.231	0.28	1
Ndufb8	0.465177	0.230308	0.445	0.491	1
Ndel1	0.471301	0.209322	0.266	0.283	1
Ctbp1	0.475526	0.272919	0.269	0.29	1
Mrpl51	0.477495	0.217063	0.258	0.273	1
Thoc2	0.477573	0.237065	0.227	0.238	1
Dnajb9	0.494446	0.279259	0.231	0.237	1
Ift20	0.507981	0.257004	0.249	0.267	1
Dpm3	0.50824	0.318266	0.271	0.289	1
Ybx3	0.51676	0.21273	0.203	0.209	1
Coa3	0.522347	0.219749	0.277	0.334	1
Ndufa12	0.538821	0.226014	0.314	0.375	1
Snu13	0.544116	0.211878	0.428	0.479	1
Rassf1	0.560182	0.271625	0.258	0.276	1
Lrrc58	0.567483	0.303183	0.264	0.291	1
Anapc5	0.572759	0.222109	0.221	0.259	1
Fam174a	0.57997	0.200806	0.269	0.319	1
Ndufb3	0.596522	0.219538	0.376	0.424	1
Eif4b	0.604606	0.240885	0.255	0.274	1
Slirp	0.610725	0.299845	0.308	0.342	1
Ndufa10	0.617338	0.211036	0.249	0.265	1
Tmbim4	0.621583	0.228368	0.303	0.334	1
Timm10b	0.627501	0.248123	0.253	0.273	1
Atp5k	0.631406	0.206549	0.328	0.369	1
Timm17a	0.664166	0.222748	0.236	0.277	1
Bud31	0.679534	0.202376	0.31	0.344	1
Vti1b	0.67972	0.212589	0.247	0.268	1
Hpcal1	0.683189	0.250819	0.31	0.345	1
Ralb	0.688338	0.219384	0.179	0.207	1
Emc10	0.691496	0.217276	0.273	0.298	1
Zcrb1	0.69487	0.256915	0.306	0.363	1
Naa38	0.70395	0.290473	0.24	0.264	1
Lims1	0.744525	0.232981	0.262	0.286	1
Actr10	0.747154	0.209299	0.183	0.208	1
Tcea1	0.757393	0.207847	0.216	0.233	1
Uqcc3	0.78105	0.216053	0.253	0.277	1
Tmpo	0.792648	0.2255	0.251	0.266	1
Mrps24	0.793029	0.268447	0.354	0.403	1
Rwdd1	0.807483	0.201672	0.325	0.369	1
Lamtor5	0.886467	0.208934	0.4	0.457	1
Med28	0.895281	0.204816	0.367	0.417	1
Zmiz1	0.899649	0.25123	0.21	0.235	1
Stub1	0.912538	0.242718	0.221	0.248	1
Pak1ip1	0.926816	0.213918	0.188	0.207	1
Cflar	0.937459	0.210665	0.236	0.26	1
Bola3	0.938038	0.221674	0.21	0.233	1
Tm2d2	0.953658	0.203859	0.247	0.279	1
Tmem256	0.956916	0.253577	0.395	0.447	1
Emc2	0.973878	0.244096	0.186	0.208	1

[truncated: 7 more sheets: Tlym, RET, RBC, NKT, NEUT, Lin-, Blym]
