# Supplementary material for: Deconstructing cold-induced brown adipocyte neogenesis in mice
Source: eLife. 2022 Jul 18;11:e80167. doi: 10.7554/eLife.80167 (PMC9348851; doi:10.7554/eLife.80167)
Supplement: Supplementary file 8. [file elife-80167-supp8.xlsx]

## Sheet: Sheet1
Supplementary File 8. List of gene-specific primers used to synthesize probes for SABER-FISH.
Gene	Probe ID	Probe Sequence
Adrb1	Adrb1_1	ACCACGATGAGCAGAACGATGAGCGCCAGCAGTAG
Adrb1	Adrb1_2	GACATGATGAAGAGGTTGGTGAGCGTCTGCAGCCG
Adrb1	Adrb1_3	AAAGGCACCACCAGCAATCCCATGACCAGATCAGC
Adrb1	Adrb1_4	AAGTCCAGAGCTCGCAGAAGAAGGAGCCGTACTCC
Adrb1	Adrb1_5	AAACTCTGGTAGCGAAAGGGCGACGTGATGGCGAG
Adrb1	Adrb1_6	GACGAAATCGCAGCACTTGGGGTCGTTGTAGCAGC
Adrb1	Adrb1_7	CATGATGCACAGGGGCACGTAGAAGGAGACGACGG
Adrb1	Adrb1_8	GGCGCTCGCAGCTGTCGATCTTCTTTACCTGTTTT
Adrb1	Adrb1_9	ATGATGATGCCCAGTGTCTTGAGCGCCTTCTGCTCG
Adrb1	Adrb1_10	TTGAAGAAGACGAAGAGGCGATCCGGCACCAGGTC
Adrb1	Adrb1_11	TAGATGATGGGGTTGAAGGCCGAGTTGGCGTAGCC
Adrb1	Adrb1_12	CTCTCTACACCTTGGACTCCGAGGAGAAGCCCTGG
Adrb1	Adrb1_13	CTCTCTTCCTCTAGGGATGCAGAGCCCGTGTCCAG
Adrb1	Adrb1_14	TAAACAGAGATCTCCTCTCTCCCCTGGGGAGCGGC
Adrb1	Adrb1_16	GGGGCTTTTCTGTACGTCTCGGATGATTCGATAGATC
Adrb1	Adrb1_17	AGAGAGAAAGGAACTCAAGACAAGCCAGTAAGCCATACTAA
Adrb1	Adrb1_19	CTTGCAGAAAGTGTCAAAACCCACCTAGGGGCGGG
Adrb1	Adrb1_20	AACCGGAAAGCCAGGTGATAGACTCCATCCTGCCC
Adrb1	Adrb1_22	GAAACACTTCCTGGCTAATTATCACCGGCCCCGCC
Adrb1	Adrb1_23	ACAGGAGACACCAGTACTCCGGAATTAGTATGCAATTTCTT
Adrb1	Adrb1_24	CAGATTTGTCTGTTTCGCATCCTTCTTTTCCCTTTGCTTTA
Adrb1	Adrb1_26	AGGTGAACCGTGCTCCACACATAGTTTCTCGAAAC
Adrb1	Adrb1_27	ACTCAGCGCCTGGTCCTTCCAACTAGTATTGATACATAAAT
Adrb1	Adrb1_25	CACTGTGCAAAATGGCCTTCCAACCACTGCCTTTT
Bmper	BMPER_1	AAGAACCAGAGCATCGTCACCTGGAGGGAATCCCG
Bmper	BMPER_2	ATTGAGCAGCAGCAAGACGCAGCAGGTAATCCCAG
Bmper	BMPER_3	CTGTCAGGAAGGAGGAAGCCAGAGACATGGGGACC
Bmper	BMPER_4	GCAAGGGTTGTCTGTGATAAATGGAATTTGGAGGACCTC
Bmper	BMPER_5	CTTTGCATCGTTCACAGCAGGCGCCTCTCTGCTTG
Bmper	BMPER_6	TGCCACTTGAAGGAACTGTTGTAGGTTCTTCCTTCA
Bmper	BMPER_7	TACAATGAACAACACAGCGCACCTCAGACTCTGTC
Bmper	BMPER_8	TCTCCTTCCCGGTATTGCACACCTTCAAACACACA
Bmper	BMPER_9	GCAGGAGCATGTAATACATTTGTTTCCTTCTGGCTGAAATT
Bmper	BMPER_10	CAGCACTGTCCTGAGGGTGTGTGACTAAGGTGCTG
Bmper	BMPER_11	CATAAACATCACTGCGAAACAGGCAGCTCCCAAAG
Bmper	BMPER_13	AGGGTGGGAGCACTTCTTCTTACAAACCATTGTTGA
Bmper	BMPER_15	GCTACCGAACTTGCACACTTTGATGTCTTCAGGGG
Bmper	BMPER_16	ACAAGCACAGATGCTGCAGTTGACTGAGGACCACA
Bmper	BMPER_18	CCATCAAAAGTGTTGTAGTGGGGATCTCCGAATACTGT
Bmper	BMPER_20	AGGGTGAGGCTGGGGAGGAGCAGTCTTTTGTCAAA
Bmper	BMPER_22	ATCAGCTCCACAGACTTGGTCCAGGAGAAGGAACG
Bmper	BMPER_23	AAAAGGTAGCCGTCCAGGTCGATGTGGAAGTGGGG
Bmper	BMPER_24	CCTCCACAAAACTGTCTCCATCCCACGATATCTCC
Bmper	BMPER_25	AAGACCACAGAGCTTGCCCTTGAGATGAGGGGCAG
Bmper	BMPER_34	TCCCAGTGCACTTTGATTCCCTCTCTCTGACAGGC
Bmper	BMPER_36	AGGGCTTATTGCATGGGCCGATCTCATTCCAGTTA
Bmper	BMPER_37	ATGAAGGACCAGATTTGCTGGGCAGTGGCAACCTG
Bmper	BMPER_39	ACTGGATTTCAAAGTCTATGGACTAGAACAAAGGTCATCGC
Bmper	BMPER_41	GCACTCTTAAAGAGACCTGATGAGTCTGCATGCCATCTTAT
Bmper	BMPER_42	CCTTCTCCAAGAAAATCTCACTCAAAGGTCCTGACTCAAAT
Bmper	BMPER_43	GCCATCTTTCTCTGGCATACATTCCAGTCTTTGGAAATACA
Bmper	BMPER_45	AGCTCTGACCCGGTGAAATCTGACAGACTCTCCTT
Bmper	BMPER_46	GCAGGACATGCAAATGGTCATATCCATTGCACACATAAGTA
Bmper	BMPER_47	GCCACTCAATGGATTTGCCAATCCTAAATTGCTCTGAGATT
Bmper	BMPER_49	TGGACAGTAATGAGACAGAATAGCCGAAGGCTTTCATTTT
Bmper	BMPER_51	AGCTAAAACAACTGGTCAGCAGTCCCTTCCCTCCT
Dcn	DCNNEW_1	CGTCTCTTGTATTGTAGCCAGAAACTTTATCGGCCCC
Dcn	DCNNEW_2	GCATCCAGCTGACACCCACATTAGATCATATGGTAATGAT
Dcn	DCNNEW_3	CCATAGCACAGTTAAGAACTAAGGTTTCACTGCGTGAGC
Dcn	DCNNEW_4	GACTGTCACTGGGTTGAAAACCTCCTGCTTCTACT
Dcn	DCNNEW_5	TGCGATGTAATTAACACTAACTATGCAGCCCAGGCA
Dcn	DCNNEW_6	TTAATCCGGGTATTTGCCACAGGAGCCCTCAAAGC
Dcn	DCNNEW_7	GCCAGAAGGAAGAAGATGAGAGTTGCCTTCATGATTATCTC
Dcn	DCNNEW_8	CTCTCTGTTCAAATGGTCCAGCCCAAGAGACTTGT
Dcn	DCNNEW_9	TGCCAGAAGCCTCATCTTCTAGCATGAAGTCAAATAAGC
Dcn	DCNNEW_10	GCACATAGATATCAGGGGATTGTCAGGGTCATAAGGGATTA
Dcn	DCNNEW_11	CTCTGTAATTTTGTTGTTTTGCAGGTCTAGCAAGGTTGTGT
Dcn	DCNNEW_12	AAGTCCTTCAGGTTCTTGAAGGCCCCTTCTTTGAT
Dcn	DCNNEW_13	GGTTTGAATGCCTCTGGACTGATTTTGCTGATCTTGT
Dcn	DCNNEW_14	GGTTCTTAGACAGGTAAAGCCTTTCCAACTTCACGAGA
Dcn	DCNNEW_15	TGGACACGAAGTTCCTGGAGAGTTCTGGGCATTTT
Dcn	DCNNEW_16	AGTCGGATTTCCGCAGCTTGGTGATCTCATTCTCA
Dcn	DCNNEW_17	TCCCTGGAAGGCTCCGTTTTCAATCCCAGAGTTTT
Dcn	DCNNEW_18	GTTGGTGTCTGAGATGCGAATGTATGAGAGACTCTTCAG
Dcn	DCNNEW_19	TCAACCTTGGTGATCTTGTTGCCATCTAGATGCACT
Dcn	DCNNEW_20	GGCCAGACTGCCATTCTCCATAACGGTGATGCTGT
Dcn	DCNNEW_21	TTGTCCAAGTGGAGTTCCCTCAGATGAGGAACATT
Dcn	DCNNEW_22	ATATACTTATGCTGTGCCAGCCCAGCAGGCACCCTG
Dcn	DCNNEW_23	GCCCAACTGCGGAGATGTTGTTGTTGTGAAGGTAG
Dcn	DCNNEW_24	TCGAGAGGGGTGTCCAGCTCGGCAGAAGTCATTTT
Gdf10	GDF10_1	AGGTATCGGGATTGGCTCTCTGTAGCAGCGCTGTG
Gdf10	GDF10_2	GAACAGACAAGGAGGGCTCAGTGTTGGCTGTGCAC
Gdf10	GDF10_3	CATGGCTGAGTAACGGTGGTGAAGGGTCTGAGCCC
Gdf10	GDF10_4	GAGCCTGAGCATGTGGATAGCGACCATGTCCTGGG
Gdf10	GDF10_6	GGAAGTCAAGTTGAAGAAATACACAGGCTTTTGGTCGATCA
Gdf10	GDF10_7	AAGGCGGCTGTGAGGATCATTTCTGAGTCTTGCAT
Gdf10	GDF10_8	CTTAGCTCGGGGCTTGCAGAATACCTCACGAGCCC
Gdf10	GDF10_9	AAAGACTGCGGAAGATTAGGTGCAAGCGTGCAGGC
Gdf10	GDF10_10	CTGAGCAGAGAGAAGCAGCTCTCCATCCCTTCGGG
Gdf10	GDF10_11	ACAAGGATATAGGGCATGTGGGAACTGGGCCGTGG
Gdf10	GDF10_13	AAATGGGTCGTATCTCTGTAGCGACACTGCTACAC
Gdf10	GDF10_14	CATTGTCTTGCAGGGGTTTTGACACCTGAGCCGCC
Gdf10	GDF10_15	ATGTGTCCTGGTCCTTCTTCTTGCGGTCTTTGCGC
Gdf10	GDF10_16	AAATCCACCTTCAGGTACCTCCTGGAGCAGACCCG
Gdf10	GDF10_18	GGCCCCAGCACAGTAGTAGGCGTCAAAGGATTTGG
Gdf10	GDF10_19	CTGACGATGCTCTGGATGGTGGCATGGTTGGATGG
Gdf10	GDF10_20	GAACACAGCATGGCTCTGGGATGCCAGGGACAATG
Gdf10	GDF10_22	GGGGTACACCTTCAGAACCGCATTCCGATTTTCAT
Gdf10	GDF10_24	GGGATGAAGCAGGTCTGTCTTCTATCTTGAAGCCA
Gdf10	GDF10_25	CTCTGTCTAGCACCTGGAACCTCCCCGAGTCAAGC
Gdf10	GDF10_27	GCACGGAAGAACTGAAGAATTGCGATGTGGTGGGC
Gdf10	GDF10_29	TGGGCAAATTGCAGACCACAGTTAATTCCAGATTTCTTC
Gdf10	GDF10_31	ACAAATGCCTGGAGTTGACATTTGAGGACACACGT
Gdf10	GDF10_32	GGGAGTACCCCAAGATTTGCATAGTCTTTCTAGGTTTTGAG
Gpnmb	gpnmb_1	CATCGCTTAACAACTCGTGCTCATGAGTCACTTGC
Gpnmb	gpnmb_3	CTCTGTTTTATGAAATACGGGGCCAGAGGGAGATCA
Gpnmb	gpnmb_4	TCTGACTCCCCAGTCCCATCCACCAGGAGTCACAG
Gpnmb	gpnmb_5	GGTTGTGCTCTCTCATGTGATCGGGATACTGTTCA
Gpnmb	gpnmb_7	ATATTGGAACCCACCAGAGCCGGTGAGTCACTGGTCA
Gpnmb	gpnmb_9	TGCAGTTCTTCTCATAGACGATATTGCCATTAGCATCTTCC
Gpnmb	gpnmb_10	TTCGGCTGGTGCCATCTTCCCAGTCACCATCATCT
Gpnmb	gpnmb_11	TTATAGAAACCCGTGCTGAACACCGACCCAGTTTT
Gpnmb	gpnmb_14	TCTGAGGAAGATCTCATCAGACAAGTTCCTGTCATTCTTCT
Gpnmb	gpnmb_18	TGAAGGTTCCATTGAGCACATAAGTGTGATTCAAAGTGTGA
Gpnmb	gpnmb_19	GGCTCTGAAGTAGCCATATCTGTTTATTCGGCAGTTTTCAT
Gpnmb	gpnmb_20	TCACAGTGAAGTCCATCAGGGAGTTGGCAGGCTGC
Gpnmb	gpnmb_21	GTGGGGTCGGAGATGATCGTACAGGCTTCCATGGG
Gpnmb	gpnmb_22	AAATTCACACAGTAGGTGCCAGACCCATTGAAGGC
Gpnmb	gpnmb_23	GTGACTGAGGAGAACACTCAGGCCCTTGCCCTTGA
Gpnmb	gpnmb_24	CTTCTCCTGGTCTCCTCGGAAGAACGGGGCTTTCG
Gpnmb	gpnmb_28	ACAGATGGGAAGAAACACTAAGTCTTCCCATGTCTTCTCTA
Gpnmb	gpnmb_29	AGACACAGCGTGTCCACCCCACGAACAGTGTAAAA
Gpnmb	gpnmb_31	TATGTGGAAAGCTGAGGCATCTGTGGTATCTCCCC
Gpnmb	gpnmb_33	ATGCTCAGTGAGTTGGAAGGCAGATGAAGCATGGC
Gpnmb	gpnmb_35	GGTAGTTCACTGAACTACACAGGGAAAATTTTCTCCCCAAT
Gpnmb	gpnmb_36	AGCCCACCACATGCTTTATAAGTGTCCATGGATAAATGAAT
Gpnmb	gpnmb_38	AGTCTGGACTCTCAGATCTCACTTGGTTGCTATTAAGGG
Gpnmb	gpnmb_39	CAGACTGAATGTTGGTCCTCCACAATGCCTCAAAA
Gpnmb	gpnmb_40	CTGTTGGGATGCCTGTGCCCAGGACTCCTTCAGTT
Gpnmb	gpnmb_42	AGACTCCTAACATGCCATGTCACTAGGTCACAAAGC
Gpnmb	gpnmb_44	AGTAGCGGCCATGTGAAGTGAGTCAGAGAGGGACA
Gpnmb	gpnmb_46	CACGTGTTTCTGTCCCCAGGCTGAGACTGTAACAC
Gpnmb	gpnmb_47	CCTGTTTTGGGTACTAGTGAACGGGCTCCTTAGTATGTAAA
Gpnmb	gpnmb_48	AGGAAGTGATCCCAAGCCCAGCCTTGCTCATTCTT
Gpnmb	gpnmb_49	AAGCTAGATAAACAAAGTCATGGACCTGCCGCTTTG
Gpnmb	gpnmb_50	GTTCCCTTACCAGGGTCACTTGGAAAATATAAATCGACACA
H2-ab1	MHCII_1	TAATGGCAGTCACCAGGACTCACACCTGCTGTGCC
H2-ab1	MHCII_2	TATCGTATGCGCTGCGTCCCGTTGGTGAAGTAGCAC
H2-ab1	MHCII_3	CGTACTCCTCCCGGTTGTAGATGTATCTGGTCACA
H2-ab1	MHCII_4	GGGCCTCTGTCCTGGACAGGGAGATGACGACATTG
H2-ab1	MHCII_5	TGTCACTGAGCAGACCAGAGTGTTGTGGTGGTTGA
H2-ab1	MHCII_6	AACCAGCGCACTTTGATCTTGGCTGGGTAGAAATC
H2-ab1	MHCII_7	TCCCCATTCCTAATAAGCTGTGTGGATGAGACCCC
H2-ab1	MHCII_8	TCATCTCCAGCATGACCAGGACCTGGAAGGTCCAG
H2-ab1	MHCII_9	CTGGGATGCTCCACGTGACAGGTGTAGACCTCTCC
H2-ab1	MHCII_10	ATGAAAAGGCCAAGCCCGAGGAAGATCACCCCAAG
H2-ab1	MHCII_11	AGAGACATTCAGGTCTTACAGTCTGAGACAGTCAACTGA
H2-ab1	MHCII_12	GAGTGGCAGGTGGACTGGCAGTCAGGAATTCGGAG
H2-ab1	MHCII_13	GGTGGTGGATACAATAGTACCATGCTAGACTCTGAGTCG
H2-ab1	MHCII_14	TCACCAAGGAGCAGAGCTACAGACAGAGACTGGGG
H2-ab1	MHCII_15	AGACAGAAAGCCTGGGGTGCGGCTGTACACAGATG
Nnat	Nnat_1	ATGGTTCCGAAAGTGGGTGGGTGGTCGAGAGCAAG
Nnat	Nnat_2	TGTGTCCCTGGAGGATTTCGAAAAGCGAATCCTAC
Nnat	Nnat_3	ACCTTGGCAAGTGCTCCTCTGACGAGGGAACACAG
Nnat	Nnat_4	ACTGTTCCGACTTGGTCCAGATCAGAATGTGGTGC
Nnat	Nnat_5	ATCTTCATGGTAGGATCTTGTGCGGCTGAGATGGT
Nnat	Nnat_6	TCTGCACCGAGATGTAGGGCTTCAGCTGGTGATGT
Pi16	PI16_5	AGTTTGCTTCTCGTCCTCTGTGAGGGCTGTGGTGG
Pi16	PI16_6	ACCTGGGCACGGTACTGGTTGTGAAGATCCACCAT
Pi16	PI16_7	ATGCCCTCGTCCGTGATGGCAAACAAGTTCTCTCCG
Pi16	PI16_8	TAATACTCATGCTCCTCGTGCCAGTTCCCCACGGC
Pi16	PI16_9	CTTCTTCCACTCCCTGGAGCGTCTCGCAGAAGTGG
Pi16	PI16_10	AGGCTCATAGTTGCACACCAGCAAATGGATGTTAG
Pi16	PI16_11	AGTTCTCACAGCTGTAGCCAAGAGGGCACTGGGAG
Pi16	PI16_12	CCGAGAAATGTAGAGTCTCAGAGGTTGCTAGGGATGG
Pi16	PI16_13	GGACTCGGTTGCCAGGGAGTCCGAGACCTTTGTTA
Pi16	PI16_14	AAGGAAGATGGTGCCTTTGTTTCTACTGCAGGTGA
Pi16	PI16_15	TACAAAAGCCTGAGCCTCTGTTGCCATGGAGGAGGG
Pi16	PI16_16	CTGCATGTGCCTTGCAGAAACCAAGGGGACCTCAG
Pi16	PI16_17	GTGAGGAAGTTAACTGGCCCTTCATCCACCGAGGG
Pi16	PI16_18	CTTCGTCCATAGATTTGGGGACAGGGATATGTGTTGAT
Pi16	PI16_19	ATTTCTTTGGGCTCACGGAGGTTGCGCTCGACTTG
Pi16	PI16_20	TCCTGACTCTGTCAGGGACATCTTGGGGTACAGCG
Pi16	PI16_21	GGTTCAGCCTCCTCCTGGATTTGGGGTACGGACTC
Pi16	PI16_22	ATTACCCGAAGCACTAGGGAAGGTGGGCAGGGATG
Pi16	PI16_23	ACACGTGAGCAGAATTCTTCAAATCCCAGTCGGCC
Pi16	PI16_24	GATAGGACACAGCAGTTGATCAGCTGACCTCTTCT
Pi16	PI16_25	TTTGGCCAGGCGGTGGTATCTTGTTTGAGCGATAG
Pi16	PI16_26	TACTGATGGGCTGGACCACACAGCCTTTCCCTTCC
Pi16	PI16_27	TAGAACTCCACTGTAAAGGGCAAGGGAGGGCCCTG
Pi16	PI16_28	GGAAGCAGACAAGTATCCCCAGAATCATGTCCTCTG
Top2a	TOP2A_1	AACAGCACTTAAATAAGAGACAACAGCACAGAAGGTCTTGG
Top2a	TOP2A_3	ACTTCCTGGTTGATCCTGGAGATGTAACCGTGAGC
Top2a	TOP2A_4	CCAGGGATCTCGTGTTGGGAAGGCATCCCGAGTAG
Top2a	TOP2A_6	CTTTCTCCAGCCTCCGATGTTCAAAAGGTACGAGC
Top2a	TOP2A_7	AACTTCTCATGGCTTAAACAAAATGCATCACGTCAGAGG
Top2a	TOP2A_8	AAAACCATCCCTAAAACAATCTCTTCTGCCTCAGAAGAGG
Top2a	TOP2A_10	GCCCGGTCAGATTTGGCTCGAGGAGCTATCGTGTC
Top2a	TOP2A_12	TCGTGGCACCTTTAGAAATTGCTCTCTCAAAATCAGAGT
Top2a	TOP2A_13	TTTTCCGAGACACGAGCACTCAAGGCTGAATCTGA
Top2a	TOP2A_14	TTTTGGATGGCTTTGACTGTTCAGTTTCCGCTGGG
Top2a	TOP2A_15	CAGGAACGCCTGGAGAAGCTGGCACACTGTCCTTA
Top2a	TOP2A_16	GGGGATTTTGGCCTTAGGTGGAGTAGCATCTAATGG
Top2a	TOP2A_17	TTTTGTCGAGGAGGGACATCAACGTTACTTTCATTACTGC
Top2a	TOP2A_18	TTTTGACAGGCTTAAACGGCAATGTAGTCTGCTTCTTTG
Top2a	TOP2A_19	GCACCATCCTCAGCAGGGGTACCCTCAACGTTTTC
Top2a	TOP2A_20	TTCTTCCTAATTTTCTTCTCTGCCTCAGCTTTCATCTCCAC
Top2a	TOP2A_21	GGGGATGACTCTTTTGCCCCGAGGAGAAGGCAAGA
Top2a	TOP2A_23	GCCTTTCCAGGAAGGCCCACTTGTTCATCCTGCTT
Top2a	TOP2A_24	AAAACAGCCAGATCTTCCTTCCACAGATCTGATGGA
Top2a	TOP2A_25	TTTGTTTGCACAGCTCATCCTTCTTCTCCTTGGTC
Top2a	TOP2A_27	AGCGAGCTTGATTATTCAGTTTAGAAGATTCTGCACCAAGC
Top2a	TOP2A_28	AGCCTGAGCTCAAAGAAGTCTCTTAGAATATCCAACACAGT
Top2a	TOP2A_29	GTTTGAAGACTTTGTGTAGGCCGACTCTCTCTGCC
Top2a	TOP2A_30	TTATTAGAGAGGGTGTCTTCTCAGTTCCATTCAACATGGGT
Top2a	TOP2A_32	AAACCGTAATGTGTGATCATCTTTTGGAGGAAACAACAACC
Top2a	TOP2A_33	AAAGGTTCAAATTATTGCTACCCACAAAATTCTGCGCCA
Top2a	TOP2A_36	TCCGTTTGAAACAAGTAAACAAAACCTTTCTCTGACCTGGT
Top2a	TOP2A_37	ACCATGGATGGGATAGACCTTTCATTATCAGAGTTGGAGA
Top2a	TOP2A_38	TAAATTCTTCTAGAAAACGATGTCGCAGAAGAGATGGCCAA
Top2a	TOP2A_40	ATCTTTCCTCTAAGAGGGAACACCCCATATTTGTCTCTTCC
Top2a	TOP2A_41	TTTTGCTGAGTCTCCCTCAGTCAGGATAAGTGTGC
Top2a	TOP2A_43	TTGAACTTCACCCAGTTTAGTATGCTTTCCACAATACCACA
