# Supplementary figures and images for: Deconstructing cold-induced brown adipocyte neogenesis in mice
Source: eLife journal article supplement (doi:10.7554/elife.80167), 2022-07-18

Figure 5-figure supplement 1

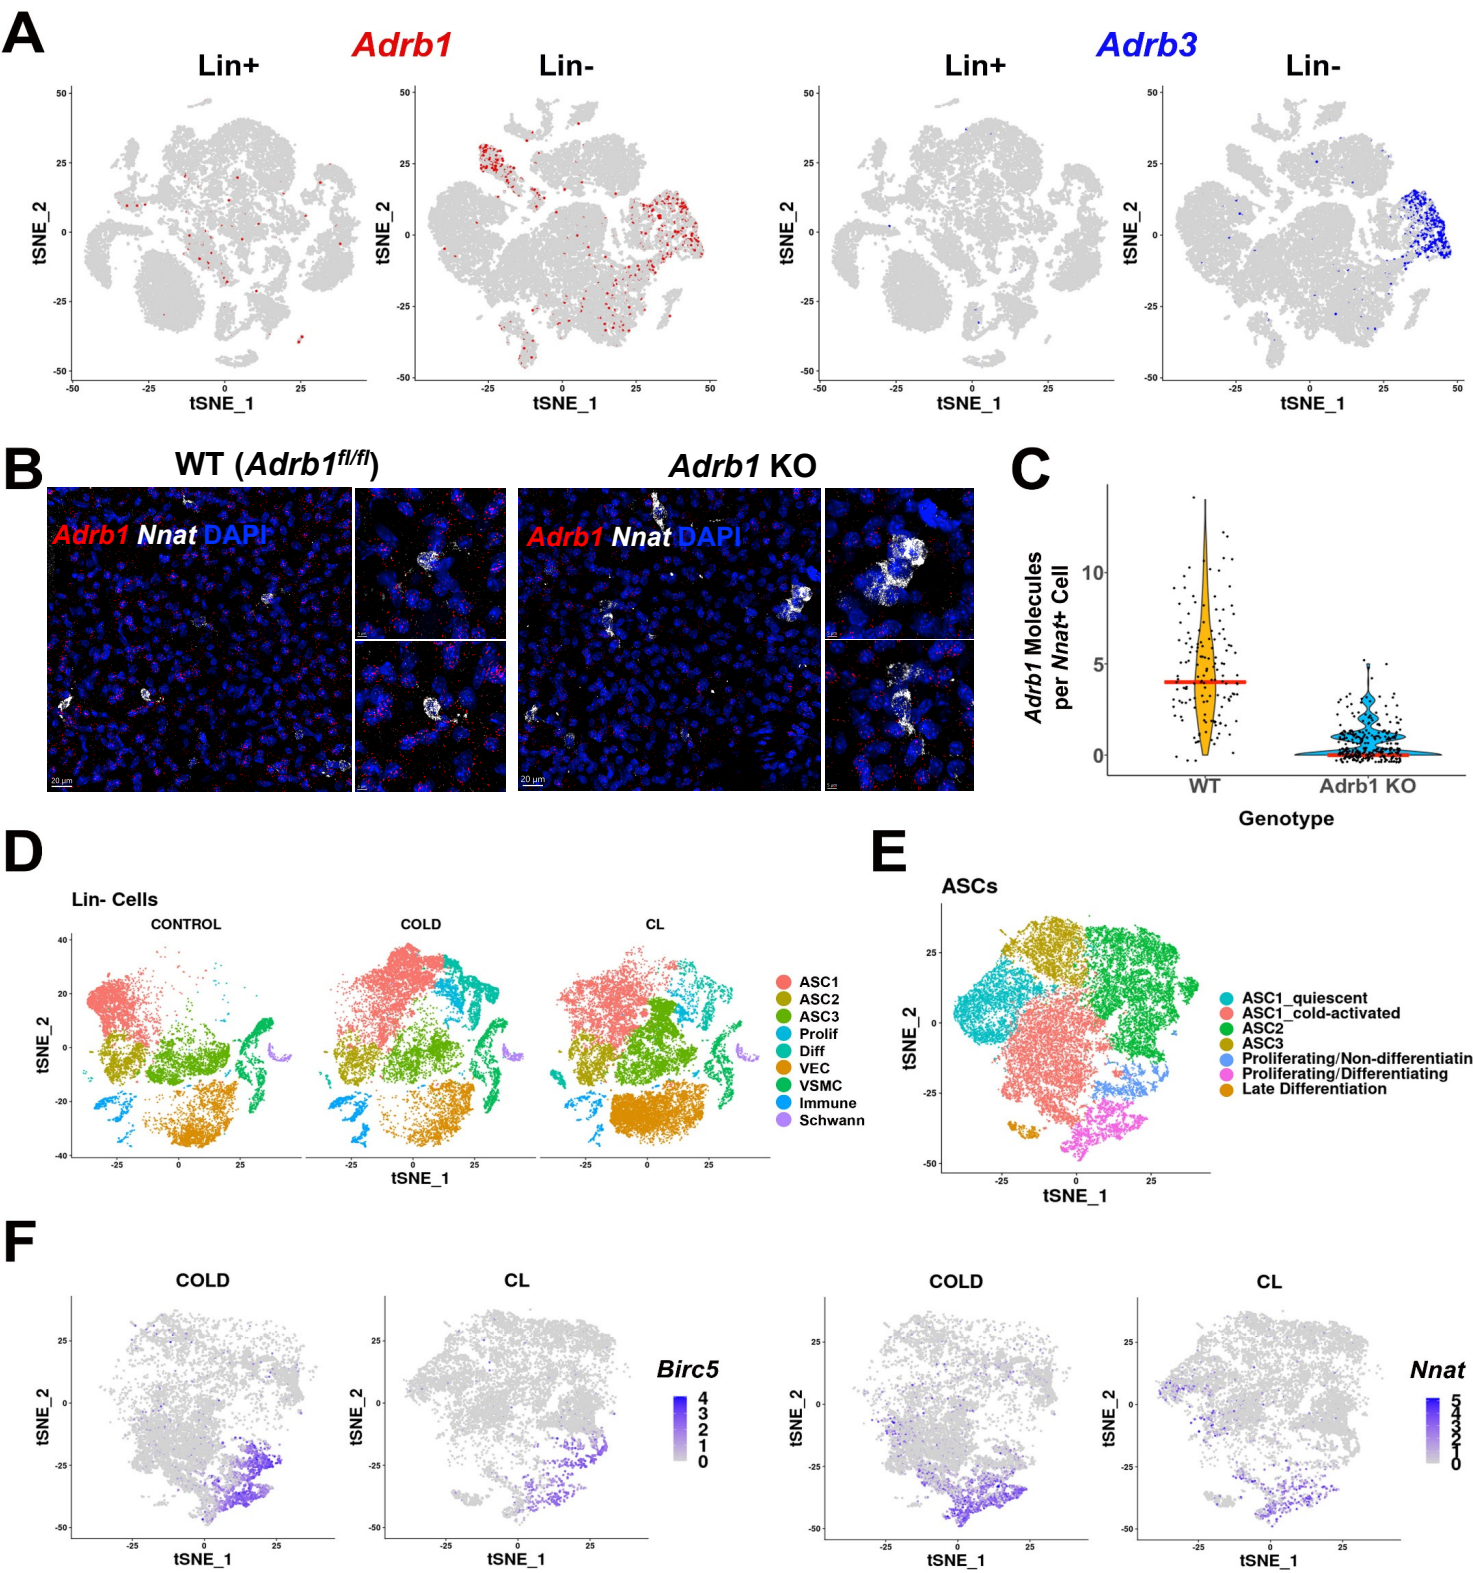

Supplement: supp [file elife-80167-supp-v1.zip]

Figure 7-figure supplement 1

**A** F4/80 PLIN1 DAPI

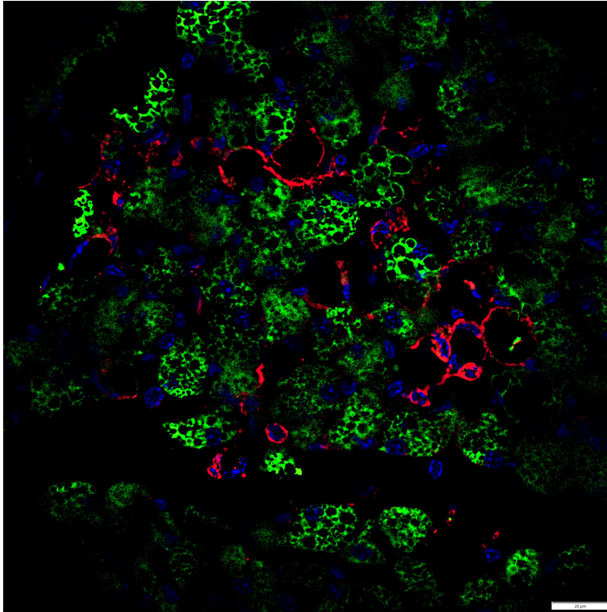

LipidTOX AF

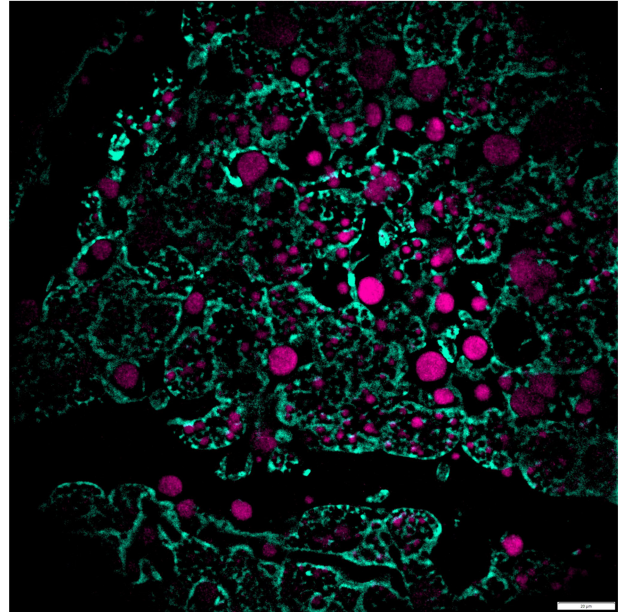

Supplement: supp [file elife-80167-supp-v1.zip]

**Figure 2-figure supplement 2**

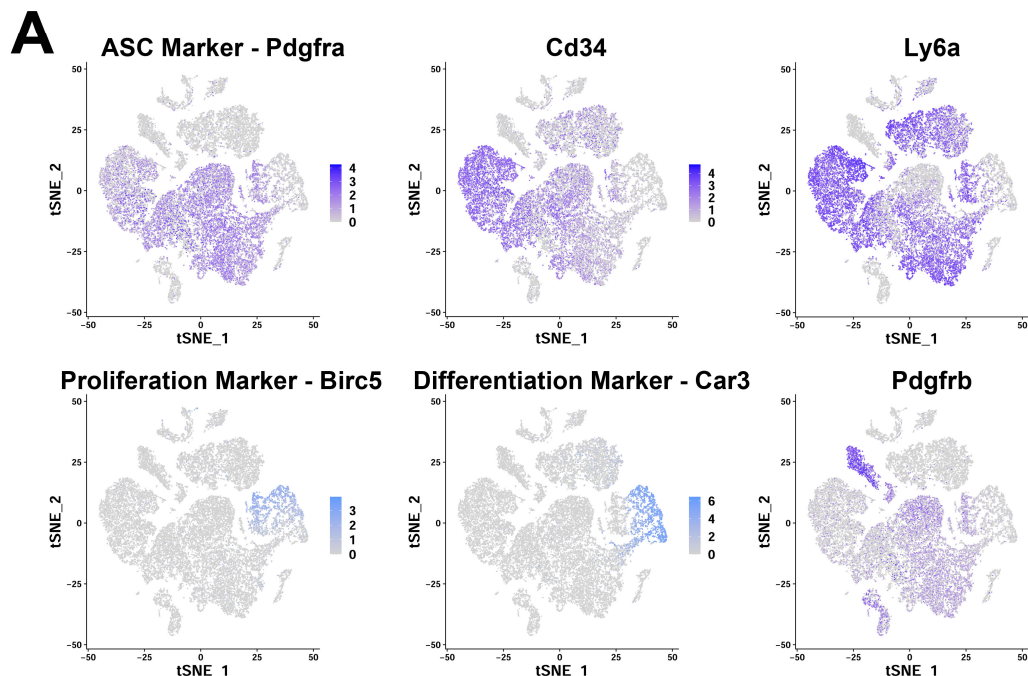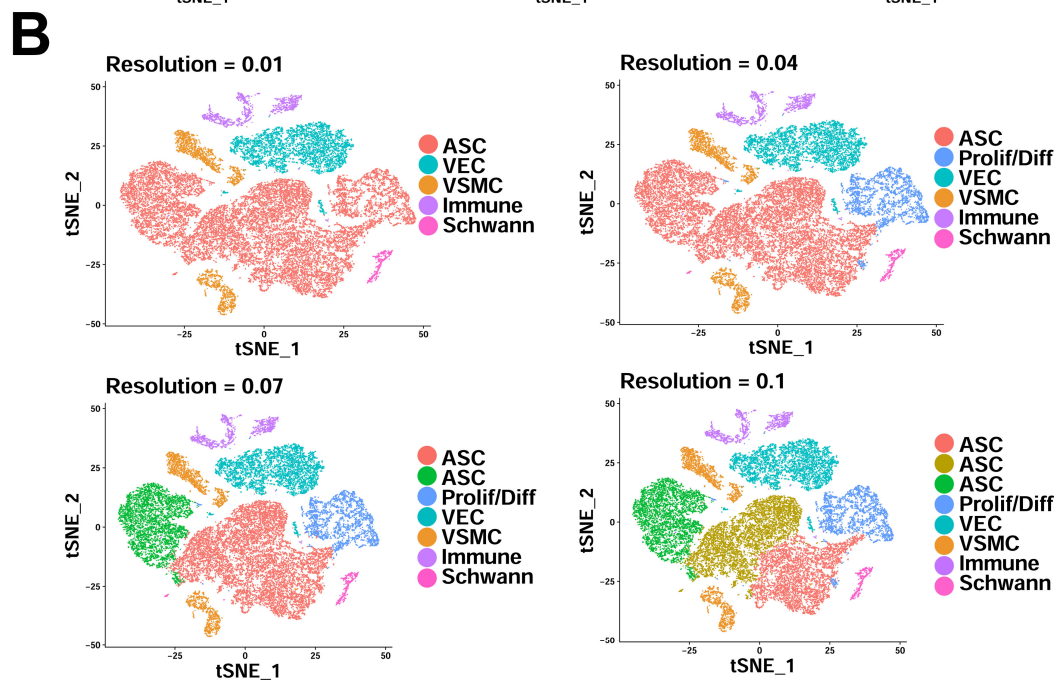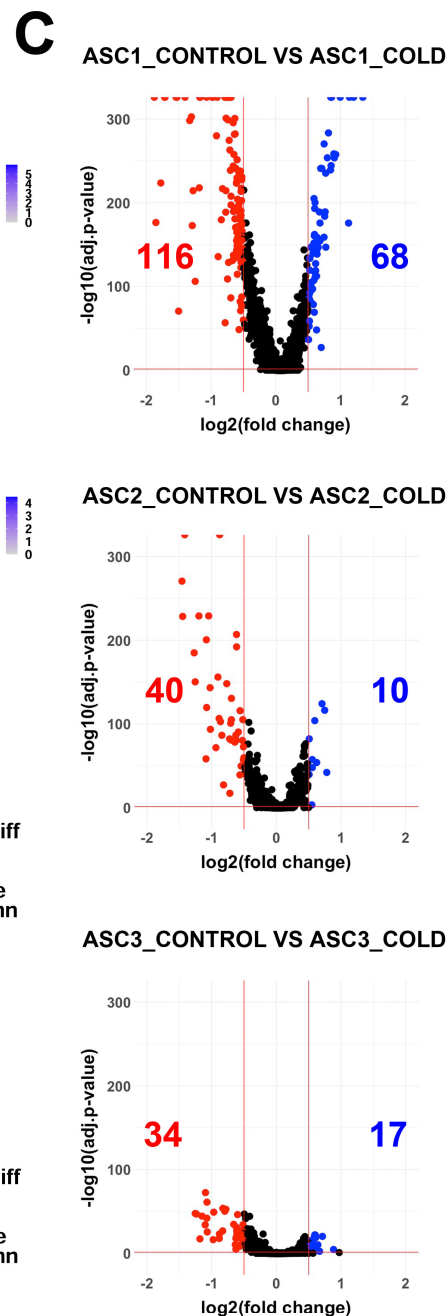

Supplement: supp [file elife-80167-supp-v1.zip]

Figure 8-figure supplement 1

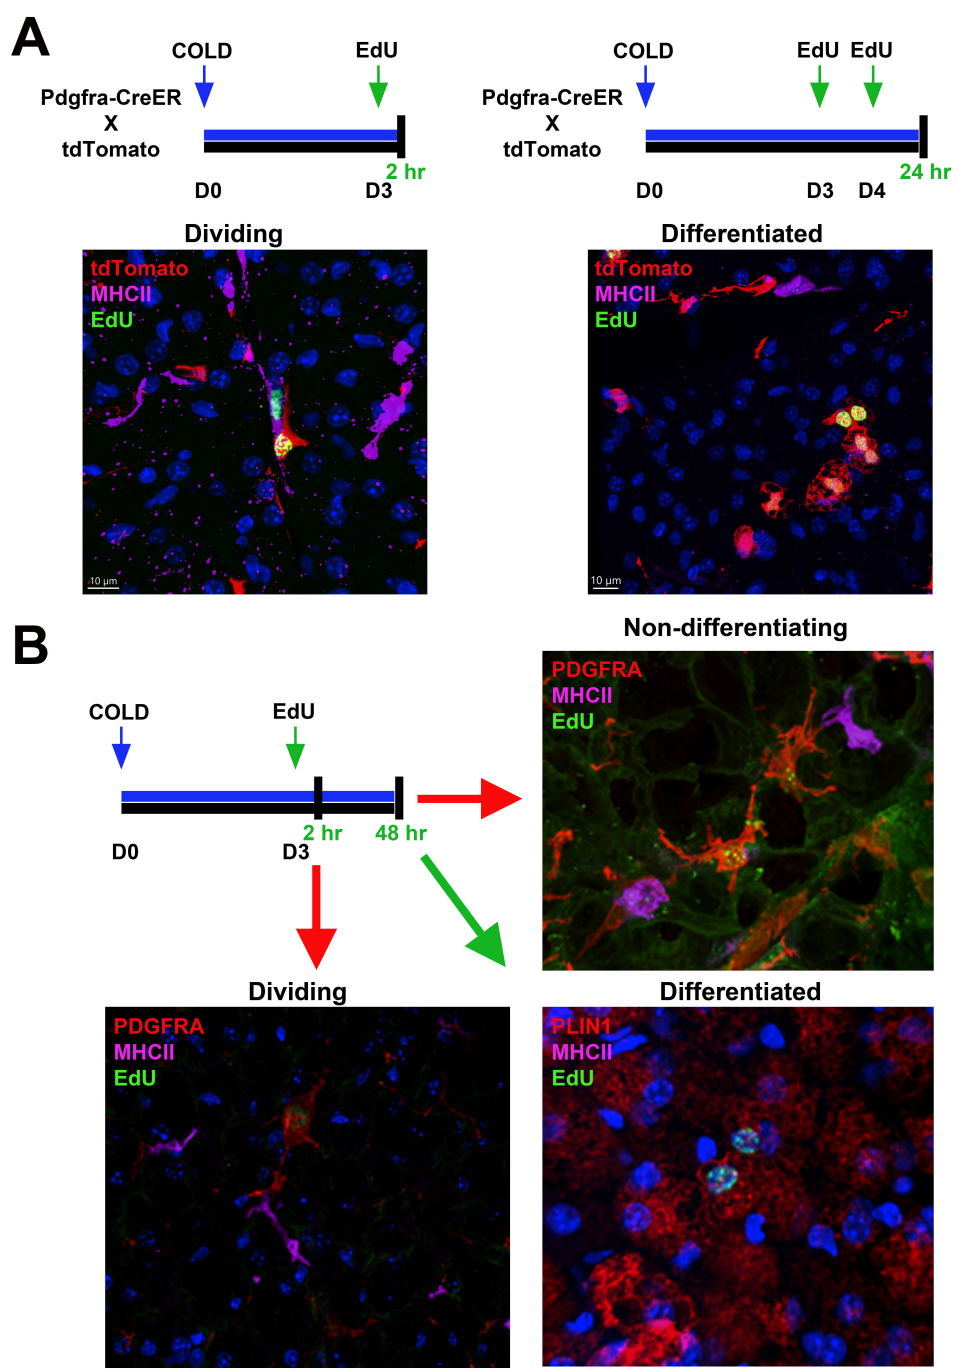

Supplement: supp [file elife-80167-supp-v1.zip]

Figure 4-figure supplement 1

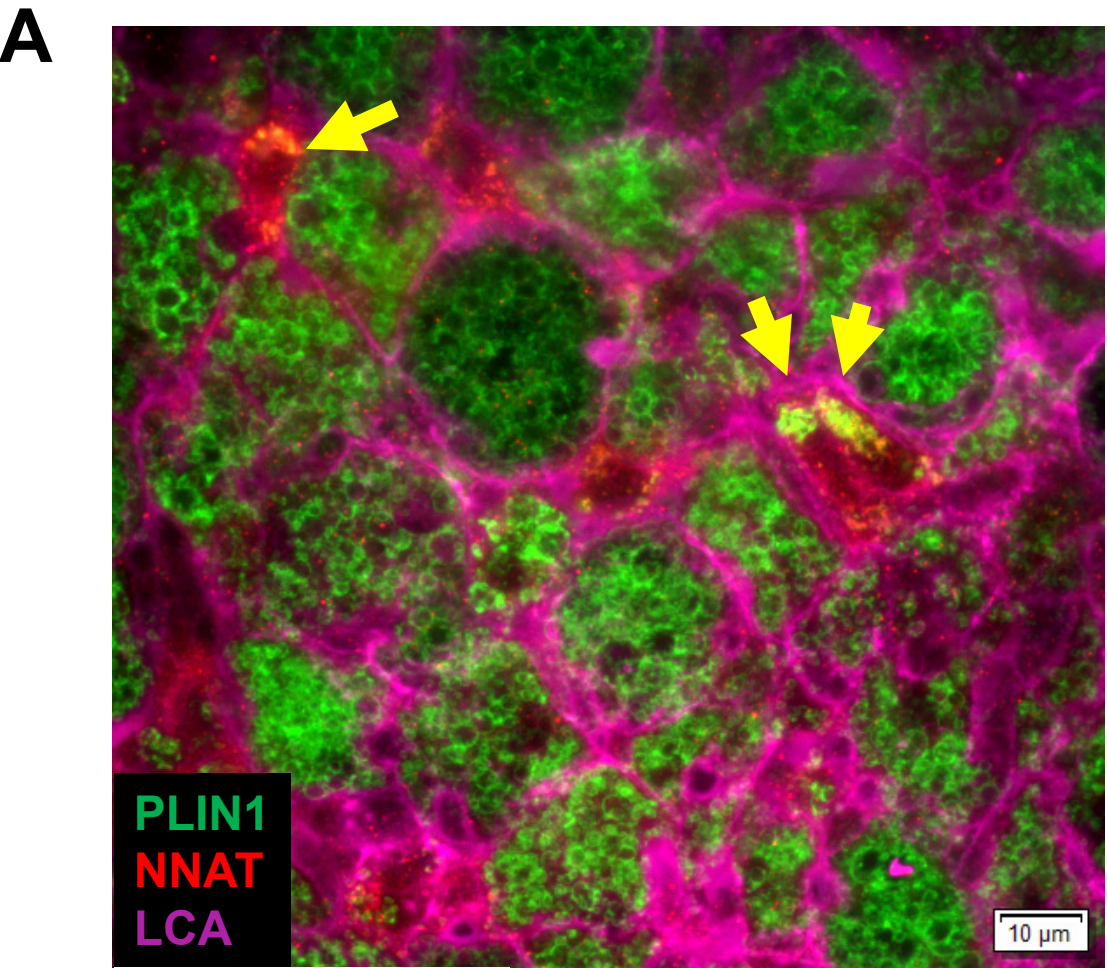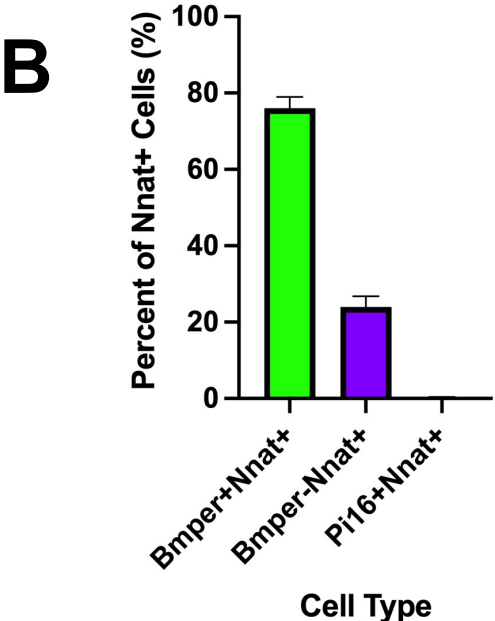

Supplement: supp [file elife-80167-supp-v1.zip]

Figure 6-figure supplement 1

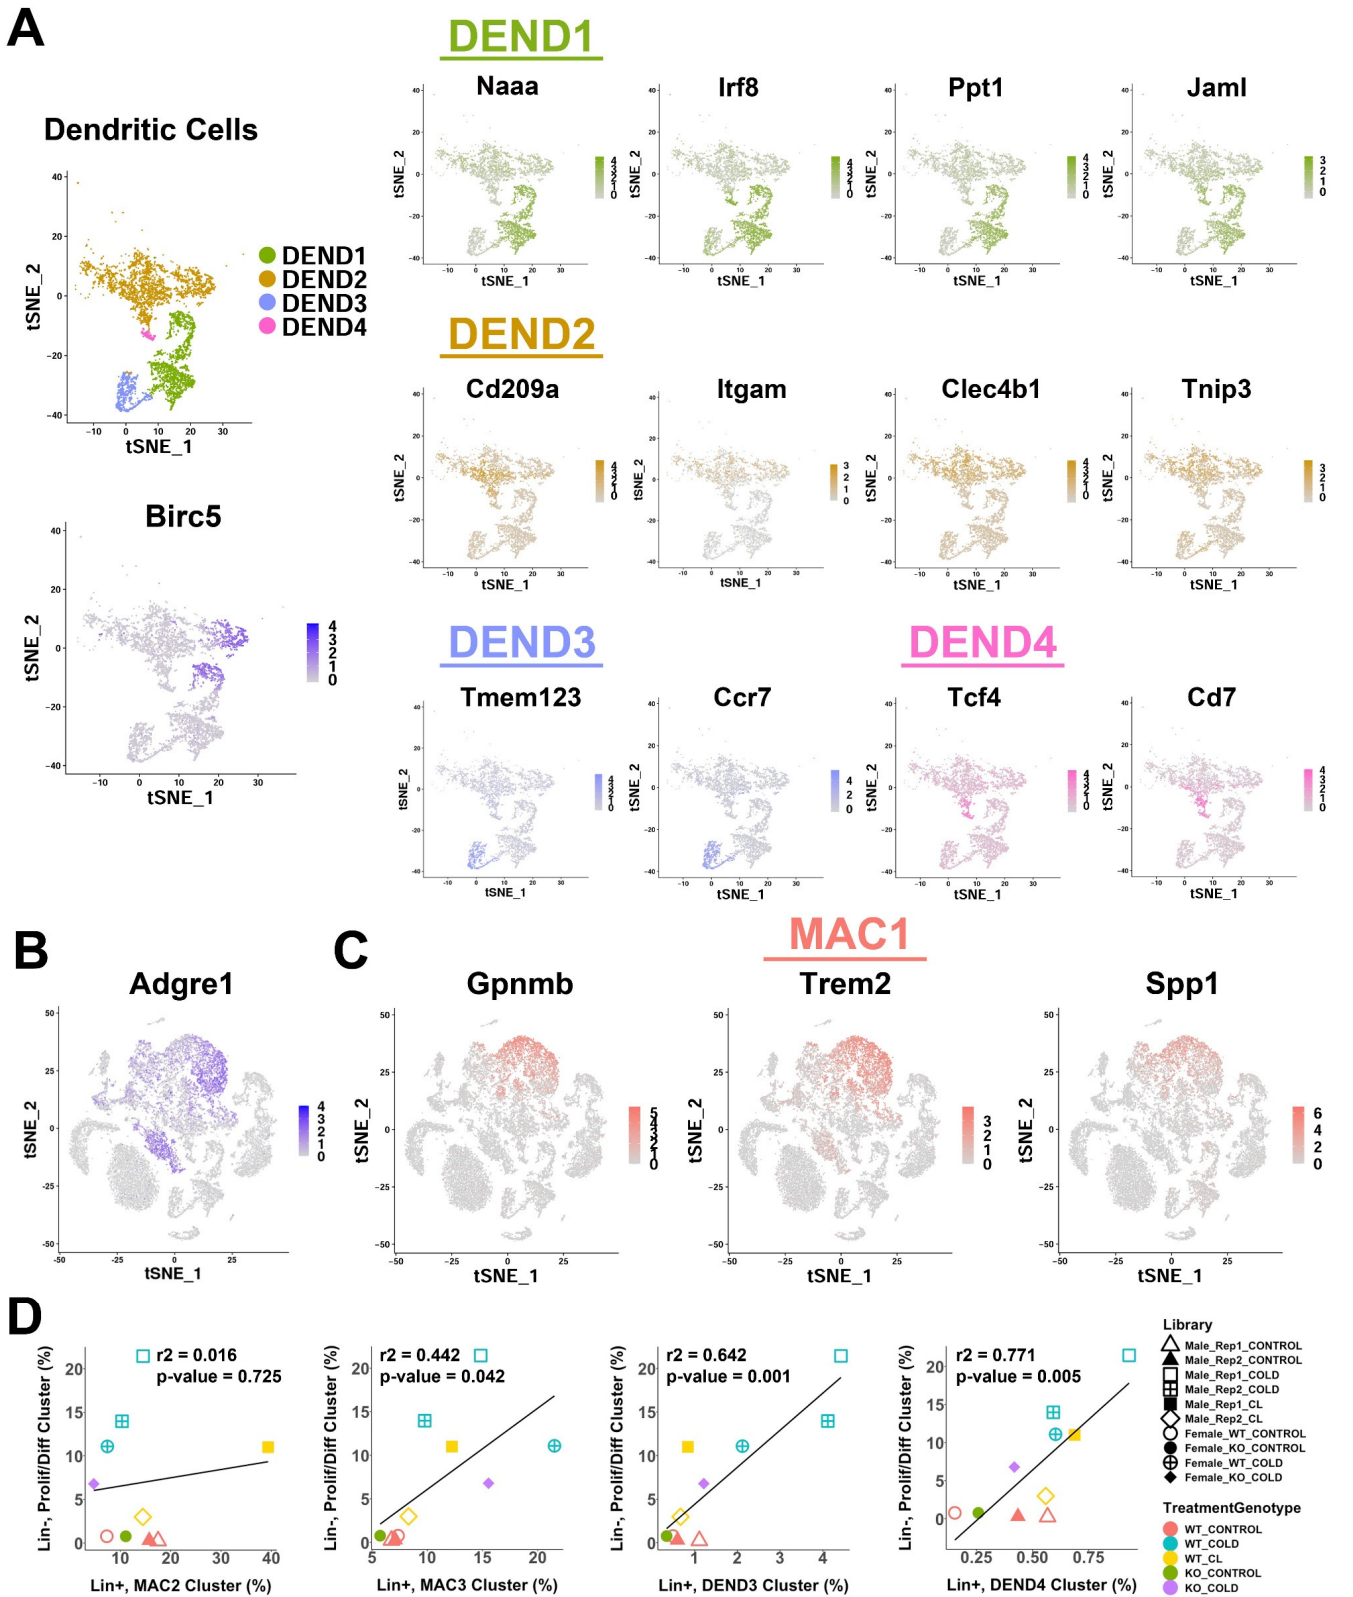

Supplement: supp [file elife-80167-supp-v1.zip]
